# Supplementary material for: ALCAM: A Novel Surface Marker on EpCAMlow Circulating Tumor Cells
Source: MDPI journal article supplement (doi:10.3390/biomedicines10081983), 2022-08-16

**Supplementary Figure S1.** G-Banding karyotyping of CTC cell lines (i) CF49, (ii) CM61 and (iii) HM59. Metaphase images from at least 5 cells per CTC were taken.

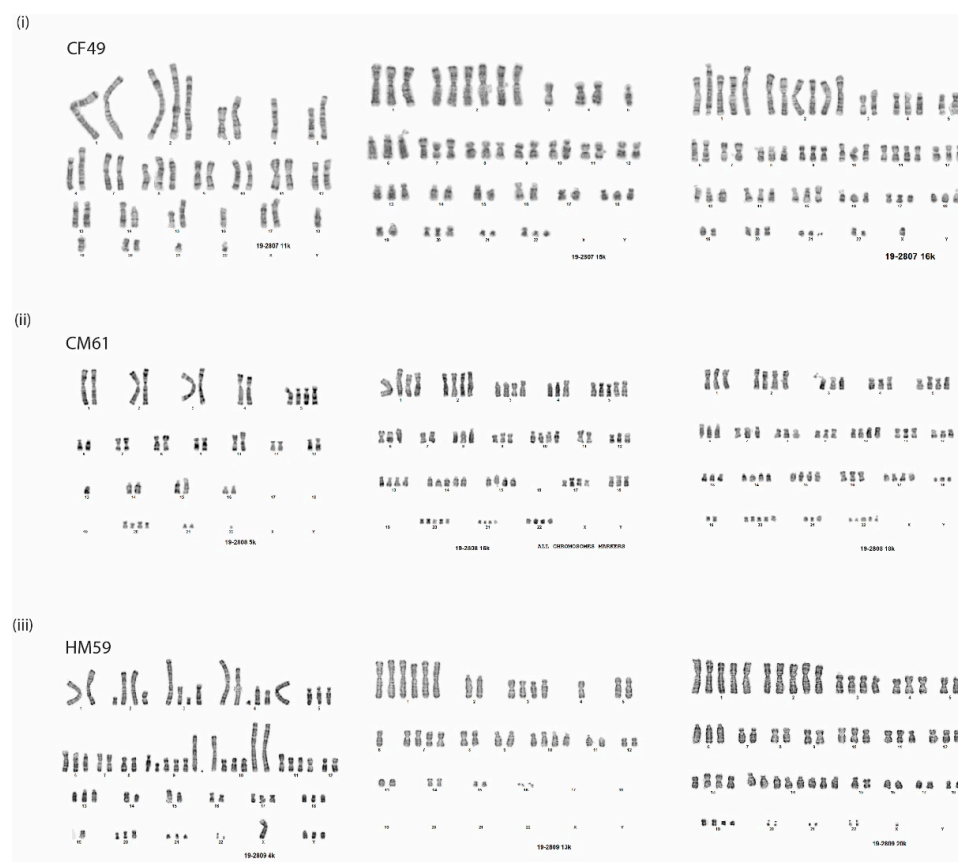

**Supplementary Figure S2.** TEM images of CM61 CTC cultured under (i) adherent and (ii) low attachment conditions.

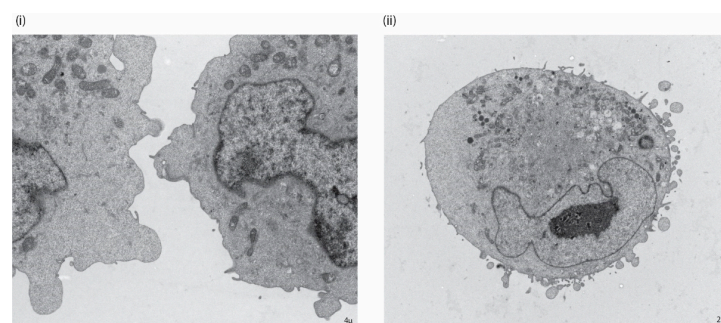

Supplement: s1 [file s1]
