# Supplementary material for: ALCAM: A Novel Surface Marker on EpCAMlow Circulating Tumor Cells
Source: Biomedicines. 2022 Aug 16;10(8):1983. doi: 10.3390/biomedicines10081983 (PMC9405826; doi:10.3390/biomedicines10081983)
Supplement: Supplementary file 1 [file biomedicines-10-01983-s001.zip]

Archive with 7 entries (7 files):
- biomedicines-1810144-supplementary.pdf
- Supplementary File S1.xlsx
- Supplementary File S2.xlsx
- Supplementary File S3.xlsx
- Supplementary File S4.xlsx
- Supplementary File S5.xlsx
- Supplementary File S6.xlsx
