# Supplementary material for: ALCAM: A Novel Surface Marker on EpCAMlow Circulating Tumor Cells
Source: Biomedicines. 2022 Aug 16;10(8):1983. doi: 10.3390/biomedicines10081983 (PMC9405826; doi:10.3390/biomedicines10081983)
Supplement: Supplementary file 1 [file biomedicines-10-01983-s001.zip › Supplementary File S1.xlsx]

## Sheet: Average Percent Positive Cells
Surface Marker	Percentage of Parent Population
	CM61	CF49	HM59
CD85h	99.93	100	100
CD166	99.83	99.95	99.98
MICA/MICB	99.9	99.93	99.86
CD9	99.73	99.79	99.93
EphA2	97.63	99.19	99.16
CD252	93.08	95.88	97.67
CD129	90.5	94.89	93.97
CD73	83.43	90.05	90.4
CD263	67.75	78.85	83.37
CD215	60.04	57.96	72.92
CD107b	48.25	71.68	65.51
CD43	50.28	53.82	65.44
TCR γ/δ	41.03	50.29	54.81
Notch 4	36.1	53.32	55.69
CD199	32.14	41	41.93
CD141	31.02	32.62	39.96
CD58	25.23	35.5	40.82
CD57	24.04	36.15	33.57
β2-microglobulin	26.92	35.84	29.82
CD74	23.44	31.78	36.41
CD301	18.46	27.06	29.93
CD277	13.56	19.52	21.89
CD245	13.27	19.35	21.24
CD220	12.37	17.12	19.18
CD87	11.73	16.6	19.18
CD344	11.07	16.46	19.56
CD126	6.63	19.14	20.68
CD107a	10.21	16.27	19.28
CD276	10.96	15.73	18.49
4-1BB Ligand	9.94	15.86	16.92
CD179a	8.49	15.13	16.85
CD196	11.61	11.23	14.69
Tim-4	8.55	13.17	13.31
CD86	8.31	12.85	12.91
CD109	7.98	5.9	19.88
CD140b	7.35	11.56	13.71
CD83	6.89	12.02	13.27
CD79b	8.7	7.93	14.79
Jagged 2	7.64	11.21	11.97
CD326	6.13	11.01	13.37
CD183	6.23	7.97	16.3
CD284	5.78	10.82	12.16
CD100	5.19	10.28	11.01
HLA-E	5.22	9.58	11.25
Notch 1	5.06	9.13	11.32
TMEM8A	4.99	10.19	10.23
CCR10	3.46	13.82	7.36
CD92	5.19	9.02	9.39
CD300c	4.08	8.25	10.72
MRGX2	3.86	10.75	8.28
CD198	4.67	7.07	11.06
CD231	3.87	10.16	7.21
CD33	2.99	7.98	9.28
CD49f	4.03	7.14	8.76
CD325	3.7	7.54	8.68
CD365	3.55	7.02	8.77
CD82	3.81	7.3	8.1
CD93	2.75	7.73	8.5
CD134	3.46	6.74	8.03
CD49c	3.07	7.14	7.72
CD193	3.92	5.83	8.18
NPC	3.66	6.24	7.38
CD314	3.4	6.58	7.28
CD317	3.08	5.88	8.06
CD32	3.68	6.66	6.61
CD49a	2.82	5.88	6.88
CD261	2.61	5.88	6.88
GPR83	2.84	5.85	6.53
CD55	2.45	6.17	6.19
CD262	2.28	5.51	6.55
CD59	3.13	5.07	6.08
CD298	2.7	5.06	5.61
CD1d	3.85	3.43	5.28
TRA-1-81	1.99	5.95	4.29
CD191	2.43	4.02	5.64
CD360	1.94	4.33	5.4
CLEC4A	2.16	4.5	4.84
SUSD2	1.59	3.15	6.27
CD96	1.67	4.48	4.78
IgM, κ Isotype Ctrl	2.18	2.74	5.72
CD184	2.1	3.4	4.48
CD258	1.87	4.29	3.55
CD309	1.64	3.62	3.91
CD80	1.52	3.34	4.06
DR3	1.69	2.46	4.04
SSEA-5	1.26	2.79	3.39
CD97	1.36	2.9	3.16
CD70	1.33	2.77	3.24
CD62E	1.31	3.1	2.93
CD151	2.15	3.04	2.11
CD64	1.3	2.72	3.28
CD202b	1.4	2.56	2.71
CD54	1.1	2.66	2.81
CD30	1.12	2.37	2.99
CD272	1.29	2.35	2.79
CD89	1.33	2.75	2.28
CD200R	0.88	2.31	2.91
CD170	1.19	2.33	2.56
CD1b	0.96	2.26	2.7
CD354	1.24	2.16	2.49
CCRL2	1.02	1.85	2.78
CD116	1.14	2.11	2.33
HVEM	1.17	2.09	2.27
CD84	1.11	2.01	2.34
CD290	1.14	2.15	2.01
CD243	0.93	1.96	2.39
CD227	1.09	1.82	2.31
SUSD2	1	2.16	1.98
CD200	0.81	1.97	2.35
CD226	0.8	1.75	2.53
CD148	0.78	2.13	1.82
IFN-γ R b chain	0.83	1.74	2.07
MERTK	0.96	1.65	1.94
CD49e	1.19	1.35	1.87
CD114	0.75	1.61	2.02
FcεRIα	0.81	1.38	2.18
CD255	0.57	1.5	2.2
LOX-1	0.96	1.15	2.13
Siglec-10	0.94	1.48	1.8
CD328	0.8	1.58	1.81
VEGFR-3	0.86	1.34	1.97
CD22	1.12	1.25	1.78
CD25	1.03	1.22	1.79
FPR3	0.88	1.55	1.58
CD158b	0.75	1.35	1.81
CD85k	0.65	1.39	1.68
CD48	0.63	1.49	1.53
Cadherin 11	0.84	1.11	1.55
CD28	0.88	0.89	1.68
IgG1, κ Isotype Ctrl	0.58	1.19	1.67
CD163	0.73	1.25	1.44
CD14	0.64	1.17	1.54
CD120b	0.73	1.12	1.46
CD197	0.7	1.17	1.41
CD144	0.63	1.12	1.49
CD158	1.03	1.1	1.07
CD156c	0.64	0.91	1.58
CD15	0.82	0.96	1.32
CD29	0.85	0.96	1.29
CD24	0.6	1.08	1.42
IgG3,k Isotype Ctrl	0.75	0.95	1.39
CD254	0.78	0.92	1.33
CD366	0.51	1.1	1.39
XCR1	0.56	1.16	1.22
NKp80	0.53	1.04	1.34
SSEA-3	0.65	0.6	1.66
CD143	0.42	1.2	1.25
Integrin α9β1	0.73	0.87	1.25
CD11c	0.56	0.97	1.27
CD99	0.64	0.81	1.32
CD112	0.55	1.16	1.02
CD294	0.71	0.88	1.09
IgM, κ Isotype Ctrl	0.58	1.1	0.95
CD18	0.4	0.86	1.35
CD135	0.49	0.94	1.18
CD1a	0.44	1.08	1.09
CD179b	0.54	1	1.06
GPR19	0.53	1.03	1.03
CD85	0.48	0.96	1.11
CD282	0.51	0.89	1.14
TCR α/β	0.68	0.91	0.92
CD27	0.55	0.8	1.14
CXCR7	0.4	1.05	1.04
CD213α1	0.5	0.81	1.15
TRA-2-49	0.62	0.64	1.13
MSC	0.58	0.9	0.9
IgG2a, κ Isotype Ctrl	0.66	0.84	0.86
MSC,NPC	0.42	0.85	1.07
CD95	0.54	0.64	1.15
ROR1	0.58	0.65	1.1
CD230 (Prion)	0.61	0.69	1.03
KLRG1	0.64	0.65	1.02
CD3	0.52	0.71	1
CD178	0.48	0.93	0.8
CD124	0.51	0.84	0.85
CD223 (LAG-3)	0.91	0.64	0.64
CD355	0.46	0.78	0.93
CD217	0.71	0.72	0.72
CD172g (SIRPγ)	0.39	0.8	0.96
Siglec-8	0.59	0.72	0.84
CD155	0.47	0.59	1.05
CD269	0.48	0.66	0.97
CD268	0.63	0.54	0.94
Blank	0.54	0.65	0.89
CD369	0.57	0.64	0.85
CD46	0.4	0.79	0.83
CD338	0.5	0.64	0.88
CD324	0.72	0.6	0.68
CD88	0.72	0.67	0.54
CD244 (2B4)	0.68	0.38	0.87
CD111	0.31	0.7	0.89
CD20	0.43	0.57	0.81
PSMA	0.62	0.51	0.68
CD274	0.41	0.7	0.64
CD85d	0.34	0.55	0.85
CD360	0.61	0.34	0.75
CD56 (NCAM)	0.43	0.56	0.67
CD119	0.24	0.67	0.71
CD218a	0.6	0.4	0.62
CD328	0.58	0.45	0.59
CD266	0.25	0.55	0.81
CD275	0.58	0.36	0.67
CD279	0.58	0.43	0.6
TLT-2	0.54	0.48	0.52
CD152 (CTLA-4)	0.44	0.46	0.63
CD11b	0.42	0.57	0.53
CD31	0.55	0.31	0.65
CD186	0.57	0.32	0.59
CD104	0.38	0.55	0.55
CD62P	0.37	0.5	0.6
CD47	0.43	0.49	0.55
Notch 2	0.55	0.48	0.43
CD194	0.4	0.36	0.68
LY6G6D	0.43	0.34	0.64
CD49b	0.39	0.45	0.57
CD357	0.48	0.36	0.56
CD63	0.27	0.41	0.7
CD38	0.35	0.36	0.67
CD35	0.42	0.41	0.55
CD192	0.42	0.41	0.55
CD36L1	0.52	0.27	0.55
CD85	0.38	0.35	0.6
Ksp37	0.62	0.22	0.49
APCDD1	0.4	0.48	0.44
GPR56	0.38	0.45	0.49
EGFR	0.48	0.37	0.45
MUC-13	0.29	0.46	0.53
CD334	0.35	0.3	0.61
CD271	0.43	0.31	0.52
CD81	0.38	0.33	0.55
CD206	0.2	0.44	0.61
CD352	0.57	0.29	0.39
CD336	0.42	0.31	0.51
CD357	0.52	0.24	0.46
CD102	0.29	0.29	0.59
Siglec-9	0.37	0.28	0.52
TM4SF20	0.34	0.36	0.45
CD340	0.3	0.3	0.51
CD8a	0.3	0.37	0.44
CD323	0.31	0.32	0.48
TIGIT (VSTM3)	0.38	0.34	0.38
CD185	0.21	0.34	0.55
CD210	0.2	0.46	0.44
CD162	0.21	0.31	0.57
CD44	0.32	0.33	0.44
CD213α2	0.22	0.41	0.45
CD370	0.12	0.35	0.61
CD94	0.38	0.3	0.38
CD8a	0.41	0.36	0.29
CD209	0.36	0.35	0.35
CD51	0.24	0.32	0.49
Sialyl Lewis X (dimeric)	0.25	0.36	0.44
CD90	0.38	0.24	0.42
CD130	0.37	0.29	0.37
CD335	0.33	0.33	0.36
CXCL16	0.38	0.31	0.33
CD40	0.27	0.32	0.41
CD5	0.27	0.33	0.4
CD205	0.24	0.17	0.58
CD337	0.25	0.21	0.53
Lymphotoxin β Receptor	0.29	0.26	0.41
CD36	0.23	0.27	0.43
GARP	0.26	0.28	0.39
CD132	0.25	0.36	0.32
TRA-2-54	0.35	0.24	0.33
Notch3	0.28	0.19	0.43
CD45RO	0.29	0.34	0.27
CD6	0.22	0.17	0.5
CD42b	0.32	0.25	0.32
TNAP	0.37	0.18	0.34
CD203c	0.17	0.28	0.44
erbB3	0.16	0.28	0.45
CD45	0.23	0.38	0.27
CD26	0.27	0.27	0.34
CD13	0.28	0.28	0.32
TSLPR	0.18	0.27	0.41
CD221	0.23	0.2	0.42
CD39	0.29	0.21	0.33
CD62L	0.43	0.2	0.19
CD371	0.3	0.12	0.4
LAP	0.23	0.21	0.36
Ganglioside GD2	0.34	0.13	0.33
CD140a	0.26	0.22	0.31
CD307e	0.25	0.21	0.32
Dopamine Receptor D1 (DRD1)	0.18	0.26	0.33
B7-H4	0.22	0.23	0.31
Blank	0.15	0.26	0.34
CD49d	0.2	0.22	0.32
CD229	0.26	0.09	0.38
CD41	0.19	0.11	0.43
CD4	0.18	0.3	0.25
CD303	0.21	0.2	0.31
CD181	0.24	0.17	0.31
CD34	0.23	0.16	0.31
CD117	0.11	0.23	0.35
CD71	0.18	0.17	0.34
CD304	0.13	0.24	0.32
CD165	0.18	0.15	0.34
CD16	0.22	0.17	0.25
CD7	0.16	0.1	0.38
CD45RB	0.13	0.19	0.32
CD45RA	0.21	0.16	0.27
CD137	0.18	0.23	0.22
IgM	0.08	0.15	0.4
CD1c	0.28	0.12	0.21
CD172a/b (SIRPα/β)	0.13	0.23	0.24
CD11a	0.24	0.16	0.19
CD161	0.17	0.15	0.26
IL-28RA	0.14	0.18	0.26
TACSTD2	0.14	0.22	0.22
CD127	0.2	0.19	0.17
CCX-CKR (CCRL1)	0.14	0.18	0.24
HLA-A,B,C	0.11	0.14	0.3
IgG2b, κ Isotype Ctrl	0.15	0.12	0.28
CD154	0.15	0.15	0.24
CD318	0.13	0.12	0.26
CD195	0.18	0.13	0.2
CD142	0.12	0.17	0.21
CD10	0.2	0.11	0.19
CD146	0.25	0.13	0.11
CD207	0.15	0.17	0.16
CD50	0.06	0.12	0.3
CD160	0.17	0.1	0.19
CD158e1	0.11	0.08	0.26
CD182	0.19	0.05	0.21
CD66b	0.05	0.12	0.27
CD180	0.11	0.07	0.25
CD164	0.14	0.05	0.24
Podoplanin	0.1	0.12	0.21
CD368	0.11	0.14	0.18
DLL4	0.02	0.19	0.2
CD123	0.18	0.02	0.21
CD150	0.14	0.07	0.2
CD105 (Endoglin)	0.16	0.08	0.17
CD66a/c/e	0.08	0.14	0.19
CD19	0.08	0.1	0.22
IgG Fc	0.16	0.08	0.16
CD131	0.19	0.13	0.07
Blank	0.1	0.03	0.26
CD106	0.13	0.03	0.22
DLL1	0.1	0.09	0.19
TRA-1-60-R	0.13	0.07	0.18
CD138	0.13	0.1	0.13
Delta Opioid Receptor	0.09	0.1	0.17
CD235ab	0.08	0.12	0.16
CD61	0.02	0.09	0.24
Blank	0.02	0.05	0.26
SSEA-4	0.05	0.07	0.2
CD21	0.02	0.1	0.17
CD23	0.02	0.05	0.17
CD169	0.03	0.08	0.12
CD85	0.13	0.03	0.07
C3aR	0.1	0.05	0.07
IgG2b, κ Isotype Ctrl	0.08	0.05	0.09
CD52	0.07	0.03	0.11
CD122	0.11	0.03	0.06
CD69	0	0.05	0.15
IgG2a, κ Isotype Ctrl	0.02	0.09	0.08
IgG Isotype Ctrl	0.05	0.03	0.09
integrin β5	0.05	0.07	0.05
CD2	0.03	0.03	0.09
CX3CR1	0.05	0.02	0.07
CD103	0.02	0.02	0.09
Ig light chain κ	0	0.03	0.09
CD319	0.04	0	0.07
IgG1, κ Isotype Ctrl	0	0.07	0.04
CD267	0.03	0	0.07
CD115	0.02	0.04	0.04
Integrin β7	0.02	0.02	0.05
CD278	0.02	0.02	0.04
Blank	0.02	0.03	0.02
CD201	0	0.02	0.04
Blank	0	0	0.05
Blank	0.02	0.03	0
Blank	0	0	0.04
Blank	0	0.02	0.02
Blank	0	0.02	0.02
Blank	0.01	0	0
HLA-DR	0	0.01	0
Blank	0	0	0
Blank	0	0	0
Ig light chain λ	0	0	0
IgD	0	0	0
Blank	0	0	0
