# Supplementary material for: ALCAM: A Novel Surface Marker on EpCAMlow Circulating Tumor Cells
Source: Biomedicines. 2022 Aug 16;10(8):1983. doi: 10.3390/biomedicines10081983 (PMC9405826; doi:10.3390/biomedicines10081983)
Supplement: Supplementary file 1 [file biomedicines-10-01983-s001.zip › Supplementary File S2.xlsx]

## Sheet: Receptor Type
© 2000-2021 QIAGEN. All rights reserved.
Symbol	Entrez Gene Name	Gene Symbol - human (HUGO / HGNC / Entrez Gene)	Location	Type(s)	Biomarker Application(s)	Drug(s)	Entrez Gene ID for Human	Entrez Gene ID for Mouse	Entrez Gene ID for Rat
TNFSF4	TNF superfamily member 4	TNFSF4	Extracellular Space	cytokine			7292	22164	89814
LAMP2	lysosomal associated membrane protein 2	LAMP2	Plasma Membrane	enzyme			3920	16784	24944
CCR9	C-C motif chemokine receptor 9	CCR9	Plasma Membrane	G-protein coupled receptor	disease progression		10803	12769	282832
EPHA2	EPH receptor A2	EPHA2	Plasma Membrane	kinase	disease progression	afatinib/dasatinib,blinatumomab/dasatinib,BT5528,corticosteroid/dasatinib,cytarabine/dasatinib,cytarabine/dasatinib/dexamethasone/methotrexate,cytarabine/dasatinib/filgrastim/fludarabine phosphate,cytarabine/dasatinib/filgrastim/fludarabine phosphate/idarubicin,dasatinib,dasatinib/6-mercaptopurine/methotrexate,dasatinib/dexamethasone,dasatinib/dexamethasone/vincristine,dasatinib/erlotinib,dasatin…	1969	13836	366492
ALCAM	activated leukocyte cell adhesion molecule	ALCAM	Plasma Membrane	other	prognosis	praluzatamab ravtansine	214	11658	79559
CD9	CD9 molecule	CD9	Plasma Membrane	other	efficacy		928	12527	24936
LILRA2	leukocyte immunoglobulin like receptor A2	LILRA2	Plasma Membrane	other			11027
MICA	MHC class I polypeptide-related sequence A	MICA	Plasma Membrane	other	safety		100507436
NT5E	5'-nucleotidase ecto	NT5E	Plasma Membrane	phosphatase		AB680,AK119,BMS-986179,CPI-006,GS-1423,LY3475070,MEDI9447,NZV930,Sym024,TJ004309	4907	23959	58813
NOTCH4	notch receptor 4	NOTCH4	Plasma Membrane	transcription regulator	diagnosis		4855	18132	406162
CD58	CD58 molecule	CD58	Plasma Membrane	transmembrane receptor			965
CD74	CD74 molecule	CD74	Plasma Membrane	transmembrane receptor		milatuzumab,milatuzumab-doxorubicin antibody-drug conjugate	972	16149	25599
IL15RA	interleukin 15 receptor subunit alpha	IL15RA	Plasma Membrane	transmembrane receptor	prognosis		3601	16169	690369
IL9R	interleukin 9 receptor	IL9R	Plasma Membrane	transmembrane receptor			3581	16199	24500
KLRC2	killer cell lectin like receptor C2	KLRC2	Plasma Membrane	transmembrane receptor			3822
MICB	MHC class I polypeptide-related sequence B	MICB	Plasma Membrane	transmembrane receptor	safety		4277	243864	365212
SPN	sialophorin	SPN	Plasma Membrane	transmembrane receptor	unspecified application		6693	20737	24796
THBD	thrombomodulin	THBD	Plasma Membrane	transmembrane receptor	efficacy		7056	21824	83580
TNFRSF10C	TNF receptor superfamily member 10c	TNFRSF10C	Plasma Membrane	transmembrane receptor			8794

## Sheet: Canonical Pathways
© 2000-2021 QIAGEN. All rights reserved.
Ingenuity Canonical Pathways	-log(p-value)	Ratio	z-score	Molecules
Crosstalk between Dendritic Cells and Natural Killer Cells	4.29	0.033	#NUM!	IL15RA,MICA,MICB
Natural Killer Cell Signaling	3.29	0.0151	#NUM!	KLRC2,MICA,MICB
Role of JAK1 and JAK3 in γc Cytokine Signaling	2.85	0.029	#NUM!	IL15RA,IL9R
STAT3 Pathway	2.28	0.0148	#NUM!	IL15RA,IL9R
Th2 Pathway	2.27	0.0146	#NUM!	NOTCH4,TNFSF4
Th1 and Th2 Activation Pathway	2.08	0.0116	#NUM!	NOTCH4,TNFSF4
Cardiac Hypertrophy Signaling (Enhanced)	2.06	0.00558	#NUM!	IL15RA,IL9R,TNFSF4
Guanosine Nucleotides Degradation III	1.98	0.0769	#NUM!	NT5E
PI3K/AKT Signaling	1.96	0.0101	#NUM!	IL15RA,IL9R
Urate Biosynthesis/Inosine 5'-phosphate Degradation	1.95	0.0714	#NUM!	NT5E
Extrinsic Prothrombin Activation Pathway	1.89	0.0625	#NUM!	THBD
Adenosine Nucleotides Degradation II	1.89	0.0625	#NUM!	NT5E
Purine Nucleotides Degradation II (Aerobic)	1.82	0.0526	#NUM!	NT5E
NAD Salvage Pathway II	1.67	0.037	#NUM!	NT5E
Coagulation System	1.56	0.0286	#NUM!	THBD
IL-9 Signaling	1.56	0.0286	#NUM!	IL9R
MIF-mediated Glucocorticoid Regulation	1.54	0.0278	#NUM!	CD74
Notch Signaling	1.52	0.0263	#NUM!	NOTCH4
Antigen Presentation Pathway	1.51	0.0256	#NUM!	CD74
Intrinsic Prothrombin Activation Pathway	1.48	0.0238	#NUM!	THBD
B Cell Development	1.47	0.0233	#NUM!	SPN
MIF Regulation of Innate Immunity	1.46	0.0227	#NUM!	CD74
Ephrin A Signaling	1.43	0.0213	#NUM!	EPHA2
Retinoic acid Mediated Apoptosis Signaling	1.33	0.0167	#NUM!	TNFRSF10C
VDR/RXR Activation	1.21	0.0128	#NUM!	THBD
Glucocorticoid Receptor Signaling	1.1	0.00344	#NUM!	IL15RA,IL9R
Airway Pathology in Chronic Obstructive Pulmonary Disease	1.04	0.00847	#NUM!	TNFSF4
Th1 Pathway	1.03	0.0082	#NUM!	NOTCH4
IL-15 Production	1.02	0.00813	#NUM!	EPHA2
NAD Signaling Pathway	0.939	0.00662	#NUM!	NT5E
Role of Pattern Recognition Receptors in Recognition of Bacteria and Viruses	0.928	0.00641	#NUM!	TNFSF4
Epithelial Adherens Junction Signaling	0.924	0.00637	#NUM!	NOTCH4
Phagosome Maturation	0.917	0.00629	#NUM!	LAMP2
Inhibition of ARE-Mediated mRNA Degradation Pathway	0.914	0.00621	#NUM!	TNFSF4
HMGB1 Signaling	0.9	0.00599	#NUM!	TNFSF4
Erythropoietin Signaling Pathway	0.876	0.00565	#NUM!	TNFSF4
IL-17 Signaling	0.854	0.00535	#NUM!	TNFSF4
Hepatic Cholestasis	0.848	0.00529	#NUM!	TNFSF4
Granulocyte Adhesion and Diapedesis	0.848	0.00529	#NUM!	CCR9
Regulation Of The Epithelial Mesenchymal Transition By Growth Factors Pathway	0.842	0.00521	#NUM!	TNFSF4
Leukocyte Extravasation Signaling	0.839	0.00518	#NUM!	SPN
Regulation of the Epithelial-Mesenchymal Transition Pathway	0.836	0.00513	#NUM!	NOTCH4
Ephrin Receptor Signaling	0.824	0.00498	#NUM!	EPHA2
Autophagy	0.801	0.00469	#NUM!	LAMP2
Agranulocyte Adhesion and Diapedesis	0.799	0.00467	#NUM!	CCR9
Sperm Motility	0.73	0.00394	#NUM!	EPHA2
Synaptogenesis Signaling Pathway	0.65	0.00321	#NUM!	EPHA2
OX40 Signaling Pathway	0.491	0.00209	#NUM!	TNFSF4
Axonal Guidance Signaling	0.471	0.00198	#NUM!	EPHA2
IL-15 Signaling	0.456	0.00189	#NUM!	IL15RA
Dendritic Cell Maturation	0.418	0.0017	#NUM!	CD58
Breast Cancer Regulation by Stathmin1	0.417	0.00169	#NUM!	CCR9
CREB Signaling in Neurons	0.411	0.00166	#NUM!	CCR9
Phagosome Formation	0.366	0.00145	#NUM!	CCR9
Systemic Lupus Erythematosus In B Cell Signaling Pathway	0.351	0.00138	#NUM!	TNFSF4
