# Supplementary material for: ALCAM: A Novel Surface Marker on EpCAMlow Circulating Tumor Cells
Source: Biomedicines. 2022 Aug 16;10(8):1983. doi: 10.3390/biomedicines10081983 (PMC9405826; doi:10.3390/biomedicines10081983)
Supplement: Supplementary file 1 [file biomedicines-10-01983-s001.zip › Supplementary File S3.xlsx]

## Sheet: Proteins
Protein FDR Confidence: A5 PMI-Byonic	Protein FDR Confidence: Sequest HT	Master	Accession	Description	Exp. q-value: A5 PMI-Byonic	Exp. q-value: Sequest HT	Coverage [%]	# Peptides	# PSMs	# Unique Peptides	# AAs	MW [kDa]	calc. pI	Score Sequest HT: Sequest HT	Biological Process	Cellular Component	Molecular Function	Pfam IDs	Entrez Gene ID	Ensembl Gene ID	Gene Symbol	Chromosome	WikiPathways	KEGG Pathways	Reactome Pathways	# Protein Pathway Groups	Abundance Ratio: (Neutrophils, Sample) / (Empty, Control)	Abundance Ratio: (CM61-adherent, Sample) / (Empty, Control)	Abundance Ratio: (CM61-low-attachment, Sample) / (Empty, Control)	Abundance Ratio: (CM61-plus-neutrophils, Sample) / (Empty, Control)	Abundances (Grouped): CM61-adherent, Sample	Abundances (Grouped): CM61-plus-neutrophils, Sample	Abundances (Grouped): CM61-low-attachment, Sample	Abundances (Grouped): Neutrophils, Sample	Abundances (Grouped): Empty, Control	Abundances (Grouped) CV [%]: CM61-adherent, Sample	Abundances (Grouped) CV [%]: CM61-plus-neutrophils, Sample	Abundances (Grouped) CV [%]: CM61-low-attachment, Sample	Abundances (Grouped) CV [%]: Neutrophils, Sample	Abundances (Grouped) CV [%]: Empty, Control	Abundances (Normalized): F1: Sample, CM61-adherent, A1	Abundances (Normalized): F2: Sample, CM61-adherent, A2	Abundances (Normalized): F3: Sample, CM61-adherent, A3	Abundances (Normalized): F4: Sample, CM61-plus-neutrophils, B1	Abundances (Normalized): F5: Sample, CM61-plus-neutrophils, B2	Abundances (Normalized): F6: Sample, CM61-plus-neutrophils, B3	Abundances (Normalized): F7: Sample, CM61-low-attachment, C1	Abundances (Normalized): F8: Sample, CM61-low-attachment, C2	Abundances (Normalized): F9: Sample, CM61-low-attachment, C3
n/a	High	Master Protein	Q13813	Spectrin alpha chain, non-erythrocytic 1 [OS=Homo sapiens]		0	56	145	1743	30	2472	284.4	5.35	1581.81	cell organization and biogenesis;cellular component movement;metabolic process;regulation of biological process;response to stimulus;transport	cytoplasm;cytoskeleton;cytosol;extracellular;membrane;organelle lumen	metal ion binding;protein binding;structural molecule activity	Pf00018, Pf00036, Pf00435, Pf07653, Pf08239, Pf08726, Pf13405, Pf13499, Pf14604	6709	ENSG00000197694.15	SPTAN1	9	Fas Ligand (FasL) pathway and Stress induction of Heat Shock Proteins (HSP) regulation	Apoptosis; Tight junction	Interaction between L1 and Ankyrins; Caspase-mediated cleavage of cytoskeletal proteins; NCAM signaling for neurite out-growth; Nephrin family interactions; Neutrophil degranulation; COPI-mediated anterograde transport; RAF/MAP kinase cascade; Interleukin-20 family signaling	33	20.027	100	100	100	6.72911e+09	4.06049e+09	8.70263e+09	2.19251e+07	1.09478e+06	12.88	20.8	23.19	6.29	107.87	5.36285e+09	6.72911e+09	6.80398e+09	3.35346e+09	5.07608e+09	4.06049e+09	5.73062e+09	8.70263e+09	9.01245e+09
n/a	High	Master Protein	Q01082-1	Spectrin beta chain, non-erythrocytic 1 [OS=Homo sapiens]		0	53	132	1441	36	2364	274.4	5.57	1087.96	cell organization and biogenesis;cellular component movement;metabolic process;regulation of biological process;response to stimulus;transport	cytoplasm;cytoskeleton;cytosol;membrane;nucleus	protein binding;RNA binding;structural molecule activity	Pf00169, Pf00307, Pf00435, Pf11971, Pf12128, Pf15410	6711	ENSG00000115306.15	SPTBN1	2	TGF-beta Signaling Pathway; Sudden Infant Death Syndrome (SIDS) Susceptibility Pathways		Nephrin family interactions; Interaction between L1 and Ankyrins; COPI-mediated anterograde transport; RAF/MAP kinase cascade; NCAM signaling for neurite out-growth; Interleukin-20 family signaling	25	3.433	100	100	100	3.53325e+09	2.20123e+09	6.09975e+09	6.2039e+06	1.80713e+06	10.81	16.78	21.25	72.73	58.51	3.30348e+09	3.53325e+09	4.06943e+09	1.88518e+09	2.63392e+09	2.20123e+09	4.10105e+09	6.09975e+09	6.10288e+09
n/a	High	Master Protein	P21333-2	Isoform 2 of Filamin-A [OS=Homo sapiens]		0	45	105	1288	97	2639	279.8	6.05	1132.51	cell organization and biogenesis;cellular component movement;metabolic process;regulation of biological process;response to stimulus;transport	cytoplasm;cytoskeleton;cytosol;extracellular;membrane;nucleus	protein binding;RNA binding;signal transducer activity	Pf00307, Pf00630	2316	ENSG00000196924.14	FLNA	X	Androgen receptor signaling pathway; Prolactin Signaling Pathway; Focal Adhesion; Hypothesized Pathways in Pathogenesis of Cardiovascular Disease; MAPK Signaling Pathway; IL-4 Signaling Pathway			6	100	100	100	100	2.66558e+09	1.13822e+09	2.64674e+09	9.85294e+07	813899	11.79	22.13	24.77	63.04	49.93	2.21097e+09	2.66558e+09	2.77978e+09	9.70099e+08	1.49037e+09	1.13822e+09	1.72475e+09	2.64674e+09	2.83833e+09
n/a	High	Master Protein	P35579-1	Myosin-9 [OS=Homo sapiens]		0	50	98	969	81	1960	226.4	5.6	883.19	cell differentiation;cell organization and biogenesis;cellular component movement;metabolic process;regulation of biological process;response to stimulus;transport	cytoplasm;cytoskeleton;cytosol;extracellular;membrane;nucleus	catalytic activity;motor activity;nucleotide binding;protein binding;RNA binding;transporter activity	Pf00063, Pf01442, Pf01496, Pf01576, Pf01765, Pf02736, Pf03962, Pf04111, Pf04156, Pf05911, Pf06637, Pf07888, Pf09731, Pf11068, Pf11559, Pf12128, Pf13094	4627	ENSG00000100345.20	MYH9	22	Primary Focal Segmental Glomerulosclerosis FSGS; VEGFA-VEGFR2 Signaling Pathway	Tight junction; Regulation of actin cytoskeleton; Salmonella infection	RHO GTPases activate PAKs; EPHA-mediated growth cone collapse; RHO GTPases Activate ROCKs; Sema4D induced cell migration and growth-cone collapse; Regulation of actin dynamics for phagocytic cup formation; RHO GTPases activate CIT; RHO GTPases activate PKNs	23	5.39	100	100	100	3.17646e+09	1.87807e+09	3.22133e+09	1.87865e+07	3.48558e+06	15.13	23.83	26.36	17.13	47.01	2.49705e+09	3.36303e+09	3.17646e+09	1.55816e+09	2.48402e+09	1.87807e+09	2.01806e+09	3.22133e+09	3.4282e+09
n/a	High	Master Protein	Q15149-7	Isoform 7 of Plectin [OS=Homo sapiens]		0	25	122	1269	118	4515	512.3	5.77	1002.09	cell organization and biogenesis	cytoplasm;cytoskeleton;cytosol;membrane	protein binding;RNA binding;structural molecule activity	Pf00307, Pf00681, Pf07812	5339	ENSG00000178209.14	PLEC	8				0	4.437	100	100	100	1.86777e+09	1.09706e+09	2.54006e+09	5.64832e+06	1.27302e+06	12.29	24.48	21.8	18.78	73.32	1.52452e+09	1.92899e+09	1.86777e+09	9.72942e+08	1.53282e+09	1.09706e+09	1.74227e+09	2.54006e+09	2.68011e+09
n/a	High	Master Protein	P04264	Keratin, type II cytoskeletal 1 [OS=Homo sapiens]		0	68	52	1326	43	644	66	8.12	1172.96	cell death;defense response;metabolic process;regulation of biological process;response to stimulus;transport	cytoskeleton;cytosol;extracellular;membrane;nucleus	catalytic activity;motor activity;protein binding;receptor activity;structural molecule activity	Pf00038, Pf01576, Pf05103, Pf05957, Pf12128, Pf13166, Pf13514	3848	ENSG00000167768.4	KRT1	12	Corticotropin-releasing hormone signaling pathway		Formation of the cornified envelope; Neutrophil degranulation	7	1.378	6.22	6.989	5.631	8.643e+08	7.82436e+08	9.71259e+08	1.91523e+08	1.38962e+08	15.45	13.44	24.86	6.4	16.66	6.74915e+08	9.1464e+08	8.643e+08	6.55346e+08	8.58998e+08	7.82436e+08	6.16329e+08	1.00314e+09	9.71259e+08
n/a	High	Master Protein	P60709	Actin, cytoplasmic 1 [OS=Homo sapiens]		0	82	32	2423	5	375	41.7	5.48	1464.1	cell organization and biogenesis;cellular component movement;metabolic process;regulation of biological process;response to stimulus	cytoplasm;cytoskeleton;cytosol;membrane;nucleus	DNA binding;nucleotide binding;protein binding;structural molecule activity	Pf00022	60	ENSG00000075624.13	ACTB	7	Arrhythmogenic Right Ventricular Cardiomyopathy; Pathogenic Escherichia coli infection; Common Pathways Underlying Drug Addiction; Myometrial Relaxation and Contraction Pathways; Focal Adhesion; Fas Ligand (FasL) pathway and Stress induction of Heat Shock Proteins (HSP) regulation; Regulation of Actin Cytoskeleton	Oxytocin signaling pathway; Bacterial invasion of epithelial cells; Dilated cardiomyopathy; Regulation of actin cytoskeleton; Arrhythmogenic right ventricular cardiomyopathy (ARVC); Proteoglycans in cancer; Hypertrophic cardiomyopathy (HCM); Phagosome; Vibrio cholerae infection; Rap1 signaling pathway; Leukocyte transendothelial migration; Pathogenic Escherichia coli infection; Salmonella infecti…	Formation of annular gap junctions; Cell-extracellular matrix interactions; UCH proteinases; MAP2K and MAPK activation; Interaction between L1 and Ankyrins; Factors involved in megakaryocyte development and platelet production; Translocation of GLUT4 to the plasma membrane; EPH-ephrin mediated repulsion of cells; Prefoldin mediated transfer of substrate to CCT/TriC; EPHB-mediated forward signalin…	102	3.504	100	100	100	2.6352e+10	2.43084e+10	3.34856e+10	1.42206e+08	4.05872e+07	12.66	13.63	18.93	11.35	80.91	2.28542e+10	2.6352e+10	2.94927e+10	2.08189e+10	2.74052e+10	2.43084e+10	2.394e+10	3.44008e+10	3.34856e+10
n/a	High	Master Protein	P35908	Keratin, type II cytoskeletal 2 epidermal [OS=Homo sapiens]		0	76	50	687	34	639	65.4	8	691.01	cell death;cell organization and biogenesis;cell proliferation;cellular component movement;metabolic process	cytoskeleton;cytosol;membrane;nucleus	protein binding;structural molecule activity	Pf00038, Pf08614, Pf12128, Pf13166	3849	ENSG00000172867.3	KRT2	12			Formation of the cornified envelope	3	1.095	6.36	6.13	3.501	1.95884e+08	1.07822e+08	1.88795e+08	3.3725e+07	3.07978e+07	9.56	13.85	17.9	17.26	38.4	1.6719e+08	2.00207e+08	1.95884e+08	8.97552e+07	1.18666e+08	1.07822e+08	1.42601e+08	1.88795e+08	2.03886e+08
n/a	High	Master Protein	O43707	Alpha-actinin-4 [OS=Homo sapiens]		0	51	51	660	36	911	104.8	5.44	453.72	cell organization and biogenesis;cellular component movement;regulation of biological process;response to stimulus;transport	cytoplasm;cytoskeleton;cytosol;extracellular;nucleus;organelle lumen	DNA binding;metal ion binding;protein binding;RNA binding	Pf00307, Pf00435, Pf08726, Pf11971, Pf13499	81	ENSG00000282844.1; ENSG00000130402.11	ACTN4	19; CHR_HG26_PATCH	Arrhythmogenic Right Ventricular Cardiomyopathy; Primary Focal Segmental Glomerulosclerosis FSGS; Striated Muscle Contraction	Arrhythmogenic right ventricular cardiomyopathy (ARVC); Leukocyte transendothelial migration; Focal adhesion; Amoebiasis; Regulation of actin cytoskeleton; Tight junction; Viral carcinogenesis; Systemic lupus erythematosus; Adherens junction	Platelet degranulation ; Nephrin family interactions	18	6.757	100	100	100	2.77762e+09	2.03757e+09	3.81644e+09	6.97151e+06	1.03169e+06	12.04	19.78	23.01	3.06	71.76	2.24611e+09	2.77762e+09	2.80169e+09	1.84249e+09	2.66861e+09	2.03757e+09	2.51421e+09	3.81644e+09	3.93183e+09
n/a	High	Master Protein	P13645	Keratin, type I cytoskeletal 10 [OS=Homo sapiens]		0	56	35	994	27	584	58.8	5.21	905.16	cell death;cell differentiation;metabolic process	cytoplasm;cytoskeleton;cytosol;membrane;nucleus	structural molecule activity	Pf00038, Pf04111	3858	ENSG00000186395.7	KRT10	17		Staphylococcus aureus infection	Formation of the cornified envelope	4	1.062	4.083	3.952	2.619	3.0216e+08	1.93764e+08	2.92443e+08	7.8583e+07	7.39961e+07	18.13	11.28	34.18	13.22	23.02	2.19599e+08	3.10706e+08	3.0216e+08	1.7782e+08	2.21893e+08	1.93764e+08	1.5525e+08	3.16845e+08	2.92443e+08
n/a	High	Master Protein	P08670	Vimentin [OS=Homo sapiens]		0	75	45	946	43	466	53.6	5.12	660.5	cell differentiation;cell organization and biogenesis;cellular component movement;metabolic process;regulation of biological process;response to stimulus	cytoplasm;cytoskeleton;cytosol;membrane	protein binding;RNA binding;structural molecule activity	Pf00038, Pf04111, Pf04156, Pf04732, Pf05622, Pf10186	7431	ENSG00000026025.15	VIM	10	Allograft Rejection; Spinal Cord Injury; Primary Focal Segmental Glomerulosclerosis FSGS; Apoptosis-related network due to altered Notch3 in ovarian cancer; Striated Muscle Contraction; TGF-B Signaling in Thyroid Cells for Epithelial-Mesenchymal Transition; T-Cell antigen Receptor (TCR) Signaling Pathway	MicroRNAs in cancer; Epstein-Barr virus infection	Interleukin-4 and 13 signaling; Caspase-mediated cleavage of cytoskeletal proteins; Striated Muscle Contraction	20	2.263	100	100	100	4.54969e+09	5.47733e+09	9.50624e+09	3.75212e+06	1.65833e+06	21.08	8.95	19.13	10.88	60.8	4.54969e+09	3.6079e+09	5.53101e+09	5.21932e+09	5.47733e+09	6.19157e+09	7.29981e+09	1.07759e+10	9.50624e+09
n/a	High	Master Protein	P05107	Integrin beta-2 [OS=Homo sapiens]		0	57	38	441	38	769	84.7	6.95	361.79	cell communication;cell death;cell differentiation;cell organization and biogenesis;cellular component movement;defense response;metabolic process;regulation of biological process;response to stimulus;transport	cell surface;membrane	metal ion binding;protein binding;receptor activity;signal transducer activity	Pf00362, Pf07965, Pf08725	3689		ITGB2	21	Integrin-mediated Cell Adhesion; Focal Adhesion; Focal Adhesion-PI3K-Akt-mTOR-signaling pathway; Microglia Pathogen Phagocytosis Pathway; TYROBP Causal Network	HTLV-I infection; Leukocyte transendothelial migration; Cell adhesion molecules (CAMs); Phagosome; Amoebiasis; Viral myocarditis; Natural killer cell mediated cytotoxicity; Malaria; Hippo signaling pathway; Staphylococcus aureus infection; Tuberculosis; Complement and coagulation cascades; Leishmaniasis; Legionellosis; Pertussis; Regulation of actin cytoskeleton; Rap1 signaling pathway; Rheumatoi…	Integrin cell surface interactions; Neutrophil degranulation; Immunoregulatory interactions between a Lymphoid and a non-Lymphoid cell; Toll Like Receptor 4 (TLR4) Cascade; Cell surface interactions at the vascular wall; Interleukin-4 and 13 signaling	37	100	100	100	100	3.37479e+08	1.34486e+08	2.45958e+08	7.28062e+07	277729	18.89	21.11	27.03	10.48	26.18	2.44355e+08	3.37479e+08	3.53345e+08	1.08724e+08	1.66254e+08	1.34486e+08	1.7722e+08	2.45958e+08	3.09124e+08
n/a	High	Master Protein	P35527	Keratin, type I cytoskeletal 9 [OS=Homo sapiens]		0	74	29	662	28	623	62	5.24	745.75	cell death;cell organization and biogenesis	cytosol;membrane;nucleus	structural molecule activity	Pf00038, Pf13166	3857	ENSG00000171403.9	KRT9	17			Formation of the cornified envelope	3	1.434	6.428	7.507	6.178	1.81961e+08	1.74874e+08	2.12484e+08	4.0598e+07	2.83066e+07	16.81	4.68	27.64	7.02	13.7	1.64034e+08	2.2633e+08	1.81961e+08	1.62483e+08	1.74874e+08	1.77538e+08	1.46923e+08	2.12484e+08	2.60753e+08
n/a	High	Master Protein	P11215-2	Isoform 2 of Integrin alpha-M [OS=Homo sapiens]		0	36	38	341	36	1153	127.2	7.23	309.51	cell differentiation;cell organization and biogenesis;cellular component movement;regulation of biological process;response to stimulus;transport	cell surface;membrane	metal ion binding;protein binding	Pf00092, Pf00357, Pf01839, Pf08441, Pf13519	3684	ENSG00000169896.16	ITGAM	16	Integrin-mediated Cell Adhesion; Focal Adhesion; Microglia Pathogen Phagocytosis Pathway; TYROBP Causal Network			4	76.445	100	100	100	8.02421e+07	5.10832e+07	8.16689e+07	3.24716e+07	424769	7.35	25.83	31.15	7.9	16.51	8.02421e+07	7.36051e+07	8.52832e+07	3.68338e+07	6.27354e+07	5.10832e+07	4.58341e+07	8.16689e+07	8.65095e+07
n/a	High	Master Protein	P07437	tubulin beta chain [OS=Homo sapiens]		0	66	23	615	4	444	49.6	4.89	400.1	cell division;cell organization and biogenesis;cellular component movement;defense response;regulation of biological process;response to stimulus;transport	cytoplasm;cytoskeleton;extracellular;membrane;nucleus;organelle lumen	catalytic activity;nucleotide binding;protein binding;structural molecule activity	Pf00091, Pf03953, Pf10644	203068	ENSG00000232575.10; ENSG00000196230.12; ENSG00000227739.10; ENSG00000224156.10; ENSG00000235067.10; ENSG00000229684.10; ENSG00000183311.16; ENSG00000232421.10	TUBB	6; CHR_HSCHR6_MHC_MANN_CTG1; CHR_HSCHR6_MHC_COX_CTG1; CHR_HSCHR6_MHC_APD_CTG1; CHR_HSCHR6_MHC_DBB_CTG1; CHR_HSCHR6_MHC_MCF_CTG1; CHR_HSCHR6_MHC_QBL_CTG1; CHR_HSCHR6_MHC_SSTO_CTG1	Pathogenic Escherichia coli infection; Parkin-Ubiquitin Proteasomal System pathway	Phagosome; Gap junction; Pathogenic Escherichia coli infection	Neutrophil degranulation; Regulation of PLK1 Activity at G2/M Transition; AURKA Activation by TPX2; Anchoring of the basal body to the plasma membrane; Recruitment of NuMA to mitotic centrosomes; Loss of Nlp from mitotic centrosomes; Recruitment of mitotic centrosome proteins and complexes	24	0.8	100	100	100	1.19543e+09	6.14874e+08	1.39618e+09	3.92989e+06	4.91205e+06	16.81	28.08	33.07	38.81	19.12	9.12028e+08	1.19543e+09	1.27104e+09	4.55361e+08	8.06103e+08	6.14874e+08	7.3333e+08	1.39618e+09	1.42764e+09
n/a	High	Master Protein	P14618	Pyruvate kinase PKM [OS=Homo sapiens]		0	74	34	373	34	531	57.9	7.84	282.32	cell death;cell organization and biogenesis;metabolic process;response to stimulus;transport	cytoplasm;cytosol;extracellular;mitochondrion;nucleus;organelle lumen	catalytic activity;metal ion binding;nucleotide binding;protein binding;RNA binding	Pf00224, Pf02887	5315	ENSG00000067225.17	PKM	15	Photodynamic therapy-induced HIF-1 survival signaling; Amino Acid metabolism; Glycolysis and Gluconeogenesis	Carbon metabolism; Glycolysis / Gluconeogenesis; Pyruvate metabolism; Central carbon metabolism in cancer; Metabolic pathways; Glucagon signaling pathway; Purine metabolism; Viral carcinogenesis; Biosynthesis of amino acids; Type II diabetes mellitus	Glycolysis; Neutrophil degranulation	20	0.256	29.943	20.287	7.331	5.56416e+08	1.36236e+08	3.7698e+08	4.75084e+06	1.85827e+07	18.56	28.84	27.5	3.78	21.52	3.96188e+08	5.60129e+08	5.56416e+08	1.04357e+08	1.85671e+08	1.36236e+08	2.26078e+08	3.7698e+08	3.89609e+08
n/a	High	Master Protein	P08238	Heat shock protein HSP 90-beta [OS=Homo sapiens]		0	48	36	511	20	724	83.2	5.03	365.68	cell organization and biogenesis;metabolic process;regulation of biological process;response to stimulus;transport	cell surface;cytoplasm;cytosol;extracellular;membrane;mitochondrion;nucleus;organelle lumen	enzyme regulator activity;nucleotide binding;protein binding;RNA binding	Pf00183, Pf02518, Pf13589	3326	ENSG00000096384.19	HSP90AB1	6	NRF2 pathway; Focal Adhesion-PI3K-Akt-mTOR-signaling pathway	NOD-like receptor signaling pathway; Antigen processing and presentation; Protein processing in endoplasmic reticulum; Progesterone-mediated oocyte maturation; PI3K-Akt signaling pathway; Prostate cancer; Estrogen signaling pathway; Pathways in cancer	Sema3A PAK dependent Axon repulsion; HSF1 activation; Attenuation phase; Neutrophil degranulation; Aryl hydrocarbon receptor signalling; Uptake and function of diphtheria toxin; Regulation of actin dynamics for phagocytic cup formation; The NLRP3 inflammasome; HSP90 chaperone cycle for steroid hormone receptors (SHR); The role of GTSE1 in G2/M progression after G2 checkpoint	42	0.913	100	100	100	1.35569e+09	4.90222e+08	1.06593e+09	1.94309e+06	2.1272e+06	16.64	27.68	30.42	5.76	75.55	1.00305e+09	1.36577e+09	1.35569e+09	3.65829e+08	6.4176e+08	4.90222e+08	6.02745e+08	1.06593e+09	1.11343e+09
n/a	High	Master Protein	P02768-1	Serum albumin [OS=Homo sapiens]		0	67	40	446	40	609	69.3	6.28	387.98	cell communication;cell organization and biogenesis;metabolic process;regulation of biological process;response to stimulus;transport	cytoplasm;endoplasmic reticulum;extracellular;Golgi;nucleus;organelle lumen	antioxidant activity;catalytic activity;DNA binding;metal ion binding;protein binding	Pf00273	213	ENSG00000163631.16	ALB	4	Selenium Micronutrient Network; Vitamin B12 Metabolism; Folate Metabolism	Thyroid hormone synthesis	Post-translational protein phosphorylation; Regulation of Insulin-like Growth Factor (IGF) transport and uptake by Insulin-like Growth Factor Binding Proteins (IGFBPs); Scavenging of heme from plasma; Platelet degranulation ; Defective SLCO1B1 causes hyperbilirubinemia, Rotor type (HBLRR); HDL remodeling; Defective SLCO1B3 causes hyperbilirubinemia, Rotor type (HBLRR); Transport of organic anions…	32	1.624	10.179	25.53	18.74	7.01848e+07	1.29213e+08	1.76034e+08	1.11996e+07	6.89523e+06	30.28	25.41	28.2	20.34	41.76	4.46027e+07	7.01848e+07	8.42265e+07	9.69876e+07	1.62881e+08	1.29213e+08	1.04224e+08	1.76034e+08	1.82732e+08
n/a	High	Master Protein	P35580	Myosin-10 [OS=Homo sapiens]		0	26	53	414	43	1976	228.9	5.54	469.59	cell organization and biogenesis;cellular component movement;metabolic process;regulation of biological process;transport	cytoplasm;cytosol;nucleus	catalytic activity;motor activity;nucleotide binding;protein binding;transporter activity	Pf00063, Pf00769, Pf01496, Pf01576, Pf02736, Pf04111, Pf05622, Pf05911, Pf06637, Pf07888, Pf09726, Pf12128, Pf13094, Pf13514	4628	ENSG00000133026.12	MYH10	17	Regulation of Actin Cytoskeleton	Regulation of actin cytoskeleton; Tight junction; Salmonella infection	RHO GTPases activate PAKs; EPHA-mediated growth cone collapse; RHO GTPases Activate ROCKs; Sema4D induced cell migration and growth-cone collapse; RHO GTPases activate CIT; RHO GTPases activate PKNs	18	0.529	100	100	100	4.08498e+08	3.49642e+08	2.37766e+08	129485	244614	13.1	23	22.52	41.89	40.73	3.25299e+08	4.15492e+08	4.08498e+08	3.49642e+08	4.95776e+08	3.31081e+08	1.66601e+08	2.37766e+08	2.63327e+08
n/a	High	Master Protein	Q9Y490	Talin-1 [OS=Homo sapiens]		0	28	60	415	60	2541	269.6	6.07	363.57	cell organization and biogenesis;cellular component movement;regulation of biological process;response to stimulus;transport	cell surface;cytoplasm;cytoskeleton;cytosol;extracellular;membrane	protein binding;structural molecule activity	Pf00373, Pf01608, Pf02174, Pf08913, Pf09141, Pf09379	7094	ENSG00000137076.20	TLN1	9	Integrin-mediated Cell Adhesion; Primary Focal Segmental Glomerulosclerosis FSGS; Focal Adhesion	Focal adhesion; Rap1 signaling pathway; Platelet activation; HTLV-I infection	SEMA3A-Plexin repulsion signaling by inhibiting Integrin adhesion; Signaling by BRAF and RAF fusions; MAP2K and MAPK activation; Smooth Muscle Contraction; XBP1(S) activates chaperone genes; GRB2:SOS provides linkage to MAPK signaling for Integrins ; Signaling by RAS mutants; Signaling by high-kinase activity BRAF mutants; Signaling by moderate kinase activity BRAF mutants; p130Cas linkage to MAP…	43	29.097	100	100	100	4.74426e+08	1.20548e+08	3.25121e+08	1.13226e+07	389131	10.77	20.94	15.48	19.84	47.52	4.74426e+08	4.74327e+08	5.68765e+08	9.99064e+07	1.51483e+08	1.20548e+08	2.47624e+08	3.31334e+08	3.25121e+08
n/a	High	Master Protein	P11142-1	Heat shock cognate 71 kDa protein [OS=Homo sapiens]		0	47	28	424	20	646	70.9	5.52	355.13	cell communication;cell organization and biogenesis;metabolic process;regulation of biological process;response to stimulus;transport	cytoplasm;cytosol;endosome;extracellular;membrane;nucleus;organelle lumen;spliceosomal complex	catalytic activity;nucleotide binding;protein binding;RNA binding	Pf00012, Pf02463, Pf06723	3312	ENSG00000109971.13	HSPA8	11	Parkin-Ubiquitin Proteasomal System pathway; MAPK Signaling Pathway; Exercise-induced Circadian Regulation	Toxoplasmosis; Spliceosome; Endocytosis; Legionellosis; Measles; MAPK signaling pathway; Longevity regulating pathway - multiple species; Estrogen signaling pathway; Antigen processing and presentation; Influenza A; Protein processing in endoplasmic reticulum; Epstein-Barr virus infection	Protein methylation; Clathrin-mediated endocytosis; Regulation of HSF1-mediated heat shock response; Golgi Associated Vesicle Biogenesis; GABA synthesis, release, reuptake and degradation; Lysosome Vesicle Biogenesis; CHL1 interactions; AUF1 (hnRNP D0) binds and destabilizes mRNA; Attenuation phase; Neutrophil degranulation; mRNA Splicing - Major Pathway; Interleukin-4 and 13 signaling; HSP90 cha…	52	1.972	100	100	100	1.05079e+09	4.7748e+08	1.32334e+09	2.469e+06	1.25204e+06	12.19	9.19	20.48	16.99	73.82	8.84472e+08	1.05079e+09	1.12811e+09	4.12992e+08	4.92901e+08	4.7748e+08	9.16685e+08	1.35906e+09	1.32334e+09
n/a	High	Master Protein	P04406-1	glyceraldehyde-3-phosphate dehydrogenase [OS=Homo sapiens]		0	74	20	248	20	335	36	8.46	281.77	cell death;cell organization and biogenesis;defense response;metabolic process;regulation of biological process;response to stimulus	cytoplasm;cytoskeleton;cytosol;membrane;nucleus	catalytic activity;enzyme regulator activity;nucleotide binding;protein binding	Pf00044, Pf02800	2597	ENSG00000111640.14	GAPDH	12	Cori Cycle; Alzheimers Disease; Glycolysis and Gluconeogenesis; Sudden Infant Death Syndrome (SIDS) Susceptibility Pathways	Alzheimer's disease; Glycolysis / Gluconeogenesis; HIF-1 signaling pathway; Metabolic pathways; Biosynthesis of amino acids; Carbon metabolism	Gluconeogenesis; Glycolysis	15	1.616	39.351	31.111	20.417	1.5895e+08	8.24705e+07	1.25663e+08	6.52581e+06	4.03924e+06	22.09	32.37	33.03	17.5	38.25	1.17028e+08	1.84072e+08	1.5895e+08	6.6239e+07	1.23181e+08	8.24705e+07	6.74402e+07	1.25663e+08	1.32942e+08
n/a	High	Master Protein	P08575-2	Isoform 2 of Receptor-type tyrosine-protein phosphatase C [OS=Homo sapiens]		0	35	40	278	40	1143	130.8	6.33	183.64	cell differentiation;cell proliferation;cellular homeostasis;defense response;metabolic process;regulation of biological process;response to stimulus;transport	cell surface;membrane	catalytic activity;protein binding;receptor activity;signal transducer activity	Pf00041, Pf00102, Pf12453, Pf12567	5788		PTPRC	1	B Cell Receptor Signaling Pathway; T-Cell antigen Receptor (TCR) pathway during Staphylococcus aureus infection; EPO Receptor Signaling; Interferon type I signaling pathways			4	13.034	57.462	65.589	19.429	9.28211e+07	3.13854e+07	1.0595e+08	2.10545e+07	1.61535e+06	21.93	30.67	30.56	11.93	22.75	7.33409e+07	1.14335e+08	9.28211e+07	2.71148e+07	4.76852e+07	3.13854e+07	6.21972e+07	1.0595e+08	1.17237e+08
n/a	High	Master Protein	P02545	Prelamin-A/C [OS=Homo sapiens]		0	55	44	485	43	664	74.1	7.02	398.39	cell organization and biogenesis;regulation of biological process;response to stimulus;transport	cytosol;membrane;nucleus	protein binding;structural molecule activity	Pf00038, Pf00932	4000	ENSG00000160789.19	LMNA	1	Arrhythmogenic Right Ventricular Cardiomyopathy; Adipogenesis; Fas Ligand (FasL) pathway and Stress induction of Heat Shock Proteins (HSP) regulation	Hypertrophic cardiomyopathy (HCM); Dilated cardiomyopathy; Apoptosis; Arrhythmogenic right ventricular cardiomyopathy (ARVC)	Signaling by BRAF and RAF fusions; Breakdown of the nuclear lamina; XBP1(S) activates chaperone genes; Initiation of Nuclear Envelope Reformation; Clearance of Nuclear Envelope Membranes from Chromatin; Depolymerisation of the Nuclear Lamina; Deregulated CDK5 triggers multiple neurodegenerative pathways in Alzheimer's disease models	33	19.405	100	100	100	1.73727e+09	3.41202e+08	2.02329e+09	9.11671e+06	469807	14.01	25.62	25.65	24.07	98.9	1.4017e+09	1.73727e+09	1.84932e+09	2.62882e+08	4.40921e+08	3.41202e+08	1.26744e+09	2.02329e+09	2.10296e+09
n/a	High	Master Protein	P68104	Elongation factor 1-alpha 1 [OS=Homo sapiens]		0	55	25	445	25	462	50.1	9.01	273.17	metabolic process;regulation of biological process;response to stimulus;transport	cytoplasm;cytoskeleton;cytosol;extracellular;membrane;nucleus;organelle lumen	catalytic activity;nucleotide binding;protein binding;RNA binding	Pf00009, Pf03143, Pf03144	1915	ENSG00000156508.17	EEF1A1	6	Translation Factors	RNA transport; Legionellosis	Peptide chain elongation; Protein methylation; Neutrophil degranulation; HSF1 activation	16	0.449	100	100	100	3.4082e+09	1.07245e+09	2.54194e+09	1.51657e+06	3.37739e+06	20.19	30.76	27.44	15.49	61.58	2.41041e+09	3.58291e+09	3.4082e+09	8.28143e+08	1.51965e+09	1.07245e+09	1.53548e+09	2.54194e+09	2.65313e+09
n/a	High	Master Protein	P02533	Keratin, type I cytoskeletal 14 [OS=Homo sapiens]		0	69	37	385	11	472	51.5	5.16	446.72	cell death;cell differentiation;cell organization and biogenesis;response to stimulus	cytoplasm;cytosol;nucleus	protein binding;structural molecule activity	Pf00038, Pf13514	3861	ENSG00000186847.5	KRT14	17	Corticotropin-releasing hormone signaling pathway		Formation of the cornified envelope; Type I hemidesmosome assembly	7	1.571	11.661	13.126	6.488	3.26283e+08	1.81543e+08	3.67277e+08	4.39701e+07	2.79809e+07	19.11	16.61	27.45	25.93	47.21	2.5293e+08	3.73362e+08	3.26283e+08	1.41754e+08	1.97824e+08	1.81543e+08	2.20802e+08	3.80466e+08	3.67277e+08
n/a	High	Master Protein	P68363	Tubulin alpha-1B chain [OS=Homo sapiens]		0	57	23	419	2	451	50.1	5.06	346.97	cell division;cell organization and biogenesis;response to stimulus;transport	cytoplasm;cytoskeleton;membrane	catalytic activity;nucleotide binding;protein binding;RNA binding;structural molecule activity	Pf00091, Pf03953	10376	ENSG00000123416.15	TUBA1B	12	Pathogenic Escherichia coli infection; Allograft Rejection; Parkin-Ubiquitin Proteasomal System pathway	Gap junction; Phagosome; Pathogenic Escherichia coli infection; Apoptosis	COPI-independent Golgi-to-ER retrograde traffic; COPI-dependent Golgi-to-ER retrograde traffic; Carboxyterminal post-translational modifications of tubulin; Recruitment of NuMA to mitotic centrosomes; Hedgehog 'off' state; Translocation of GLUT4 to the plasma membrane; Microtubule-dependent trafficking of connexons from Golgi to the plasma membrane; Separation of Sister Chromatids; COPI-mediated …	66	0.25	100	100	100	1.05177e+09	6.28652e+08	1.18475e+09	1.0621e+06	4.24763e+06	20.21	27.97	33.96	107.69	13.78	7.49114e+08	1.05177e+09	1.11779e+09	5.11673e+08	8.80387e+08	6.28652e+08	6.28385e+08	1.18475e+09	1.2726e+09
n/a	High	Master Protein	P15924-1	Desmoplakin [OS=Homo sapiens]		0	27	88	349	88	2871	331.6	6.81	236.5	cell death;cell differentiation;cell organization and biogenesis;metabolic process;regulation of biological process;response to stimulus;transport	cytoplasm;cytoskeleton;membrane;nucleus	catalytic activity;motor activity;protein binding;RNA binding;structural molecule activity	Pf00038, Pf00681, Pf01540, Pf01576, Pf02463, Pf04111, Pf04156, Pf05483, Pf05557, Pf05622, Pf06008, Pf06160, Pf06637, Pf07888, Pf10174, Pf12072, Pf12128, Pf13166	1832	ENSG00000096696.13	DSP	6	Arrhythmogenic Right Ventricular Cardiomyopathy; Lung fibrosis	Arrhythmogenic right ventricular cardiomyopathy (ARVC)	Apoptotic cleavage of cell adhesion proteins; Formation of the cornified envelope; Neutrophil degranulation	14	1.382	38.742	33.721	43.999	6.62627e+07	7.52546e+07	5.76758e+07	2.36433e+06	1.71036e+06	15.05	28.1	19.25	12.53	86.56	5.18078e+07	6.94727e+07	6.62627e+07	5.84168e+07	1.02216e+08	7.52546e+07	4.24069e+07	5.76758e+07	6.23318e+07
n/a	High	Master Protein	P02538	Keratin, type II cytoskeletal 6A [OS=Homo sapiens]		0	60	46	407	8	564	60	8	395.02	cell death;cell differentiation;cell organization and biogenesis;defense response;metabolic process;regulation of biological process;response to stimulus	cytosol;membrane;nucleus	protein binding;structural molecule activity	Pf00038, Pf04111, Pf13166	3853	ENSG00000205420.10	KRT6A	12	Ectoderm Differentiation		Formation of the cornified envelope	4	0.774	24.596	42.088	30.826	2.01876e+08	2.53017e+08	3.45455e+08	6.3525e+06	8.20785e+06	7.3	46.1	24.47	22.88	118.79	2.10422e+08	1.82198e+08	2.01876e+08	4.75367e+08	2.06559e+08	2.53017e+08	4.24832e+08	3.45455e+08	2.57299e+08
n/a	High	Master Protein	P11021	78 kDa glucose-regulated protein [OS=Homo sapiens]		0	50	38	418	36	654	72.3	5.16	378.1	cell communication;cell death;cell differentiation;cell organization and biogenesis;metabolic process;regulation of biological process;response to stimulus;transport	cell surface;cytoplasm;endoplasmic reticulum;membrane;mitochondrion;nucleus;organelle lumen	catalytic activity;metal ion binding;nucleotide binding;protein binding	Pf00012, Pf01968, Pf06723	3309	ENSG00000044574.7	HSPA5	9	Parkin-Ubiquitin Proteasomal System pathway; Apoptosis-related network due to altered Notch3 in ovarian cancer; Photodynamic therapy-induced unfolded protein response; MAPK Signaling Pathway	Antigen processing and presentation; Protein export; Thyroid hormone synthesis; Prion diseases; Protein processing in endoplasmic reticulum	Platelet degranulation ; PERK regulates gene expression; ATF6 (ATF6-alpha) activates chaperone genes; Antigen Presentation: Folding, assembly and peptide loading of class I MHC; Regulation of HSF1-mediated heat shock response; IRE1alpha activates chaperones	27	12.622	100	100	100	8.76111e+08	4.33993e+08	1.7848e+09	5.07761e+06	402268	18.42	26.48	25.24	16.21	110.23	6.45861e+08	9.28935e+08	8.76111e+08	3.67683e+08	6.08703e+08	4.33993e+08	1.13443e+09	1.7848e+09	1.87223e+09
n/a	High	Master Protein	P09651-1	Heterogeneous nuclear ribonucleoprotein A1 [OS=Homo sapiens]		0	49	20	246	18	372	38.7	9.13	205.28	cell communication;metabolic process;regulation of biological process;response to stimulus;transport	cytoplasm;membrane;nucleus;spliceosomal complex	DNA binding;protein binding;RNA binding	Pf00076, Pf13893, Pf14259	3178	ENSG00000135486.17	HNRNPA1	12	mRNA Processing	Spliceosome	mRNA Splicing - Major Pathway; FGFR2 alternative splicing	11	0.126	100	100	48.106	3.1754e+08	7.64433e+07	3.45538e+08	200632	1.58906e+06	7.86	20.21	13.45	37.51	65.16	3.05013e+08	3.54248e+08	3.1754e+08	7.42576e+07	1.0514e+08	7.64433e+07	2.73429e+08	3.45538e+08	3.51722e+08
n/a	High	Master Protein	P04114	apolipoprotein B-100 [OS=Homo sapiens]		0	11	54	431	54	4563	515.3	7.05	232.88	cell organization and biogenesis;cellular component movement;metabolic process;regulation of biological process;response to stimulus;transport	cytoplasm;cytosol;endoplasmic reticulum;endosome;extracellular;membrane;organelle lumen	protein binding;transporter activity	Pf01347, Pf04286, Pf06448, Pf09172, Pf12491	338		APOB	2	Selenium Micronutrient Network; Vitamin B12 Metabolism; Folate Metabolism; Statin Pathway	Fat digestion and absorption; Vitamin digestion and absorption	Post-translational protein phosphorylation; Cargo recognition for clathrin-mediated endocytosis; Regulation of Insulin-like Growth Factor (IGF) transport and uptake by Insulin-like Growth Factor Binding Proteins (IGFBPs); LDL remodeling; Scavenging by Class H Receptors; VLDL clearance; Retinoid metabolism and transport; Chylomicron remodeling; Scavenging by Class A Receptors; LDL clearance; Plate…	46	0.308	7.768	9.353	5.89	2.29656e+08	1.74117e+08	2.76513e+08	9.10568e+06	2.95639e+07	13.01	15.21	5.15	29.76	37.18	1.90715e+08	2.47314e+08	2.29656e+08	1.81891e+08	1.74117e+08	1.35393e+08	2.76513e+08	2.85456e+08	2.57852e+08
n/a	High	Master Protein	O75369-1	Filamin-B [OS=Homo sapiens]		0	24	51	370	44	2602	278	5.73	265.26	cell differentiation;cell organization and biogenesis;development;regulation of biological process;response to stimulus	cytoplasm;cytoskeleton;cytosol;membrane;nucleus	protein binding;RNA binding	Pf00307, Pf00630	2317	ENSG00000136068.14	FLNB	3	VEGFA-VEGFR2 Signaling Pathway	Proteoglycans in cancer; MAPK signaling pathway; Salmonella infection; Focal adhesion	ISG15 antiviral mechanism	10	1.709	100	100	100	4.8439e+08	1.53204e+08	4.98505e+08	638061	373384	12.24	22.59	26.01	34.86	38.42	3.89896e+08	4.87796e+08	4.8439e+08	1.28659e+08	2.00076e+08	1.53204e+08	3.04715e+08	5.03112e+08	4.98505e+08
n/a	High	Master Protein	P06733-1	alpha-enolase [OS=Homo sapiens]		0	59	25	308	21	434	47.1	7.39	272.54	metabolic process;regulation of biological process;response to stimulus	cell surface;cytoplasm;cytosol;membrane;nucleus	catalytic activity;DNA binding;metal ion binding;protein binding;RNA binding	Pf00113, Pf03952, Pf13378	2023	ENSG00000074800.13	ENO1	1	Glycolysis and Gluconeogenesis	Biosynthesis of amino acids; Carbon metabolism; Metabolic pathways; Glycolysis / Gluconeogenesis; RNA degradation; HIF-1 signaling pathway	Gluconeogenesis; Glycolysis	12	29.077	100	100	100	6.74882e+08	3.12507e+08	8.64353e+08	2.20849e+07	759533	18.54	22.64	31.54	9.17	80.66	4.95345e+08	6.74882e+08	7.1359e+08	2.35517e+08	3.74475e+08	3.12507e+08	4.92262e+08	8.64353e+08	9.46783e+08
n/a	High	Master Protein	P13639	Elongation factor 2 [OS=Homo sapiens]		0	45	38	421	37	858	95.3	6.83	295.67	cell differentiation;cell proliferation;metabolic process;regulation of biological process;response to stimulus;transport	cytoplasm;cytosol;extracellular;membrane;nucleus;organelle lumen;ribosome	catalytic activity;nucleotide binding;protein binding;RNA binding	Pf00009, Pf00679, Pf03144, Pf03764, Pf14492	1938	ENSG00000167658.15	EEF2	19	Translation Factors; AMP-activated Protein Kinase (AMPK) Signaling; Brain-Derived Neurotrophic Factor (BDNF) signaling pathway	AMPK signaling pathway; Oxytocin signaling pathway	Peptide chain elongation; Protein methylation; Synthesis of diphthamide-EEF2; Neutrophil degranulation; Uptake and function of diphtheria toxin	20	4.81	100	100	100	9.67547e+08	2.74572e+08	7.96316e+08	1.56983e+06	326359	16.41	23.83	25.38	13.54	108.93	8.4222e+08	9.67547e+08	1.165e+09	2.15558e+08	3.48542e+08	2.74572e+08	5.09229e+08	7.96316e+08	8.46777e+08
n/a	High	Master Protein	P46940	Ras GTPase-activating-like protein IQGAP1 [OS=Homo sapiens]		0	29	42	275	42	1657	189.1	6.48	219.09	cell growth;regulation of biological process;response to stimulus;transport	cytoplasm;cytoskeleton;cytosol;membrane;nucleus	enzyme regulator activity;metal ion binding;protein binding	Pf00307, Pf00397, Pf00616, Pf03836, Pf11016	8826	ENSG00000140575.12	IQGAP1	15	VEGFA-VEGFR2 Signaling Pathway; EGF/EGFR Signaling Pathway; Regulation of Actin Cytoskeleton; G13 Signaling Pathway	Adherens junction; Proteoglycans in cancer; Regulation of actin cytoskeleton	Signaling by BRAF and RAF fusions; MAP2K and MAPK activation; RHO GTPases activate IQGAPs; Glucagon-like Peptide-1 (GLP1) regulates insulin secretion; Signaling by RAS mutants; Signaling by high-kinase activity BRAF mutants; Signaling by moderate kinase activity BRAF mutants; Nephrin family interactions; Paradoxical activation of RAF signaling by kinase inactive BRAF; Neutrophil degranulation; In…	35	2.04	100	100	100	4.85673e+08	1.2556e+08	3.85643e+08	597103	292751	16.21	20.51	25.81	9.68	20.21	3.75647e+08	4.85673e+08	5.17754e+08	1.01063e+08	1.52939e+08	1.2556e+08	2.39041e+08	3.85643e+08	3.96192e+08
n/a	High	Master Protein	Q00610-2	Isoform 2 of Clathrin heavy chain 1 [OS=Homo sapiens]		0	24	32	285	32	1639	187.8	5.69	227.83	cell differentiation;cell division;cell organization and biogenesis;cellular component movement;metabolic process;regulation of biological process;response to stimulus;transport	cytosol;endosome;membrane;vacuole	protein binding;RNA binding;structural molecule activity	Pf00637, Pf01394, Pf04053, Pf09268, Pf13838	1213	ENSG00000141367.11	CLTC	17	Synaptic Vesicle Pathway; VEGFA-VEGFR2 Signaling Pathway; Complement and Coagulation Cascades			3	2.493	100	100	100	4.30491e+08	3.64881e+08	4.23838e+08	188088	75455.7	15.23	29.3	21.16	27.12	69.1	3.51252e+08	4.77801e+08	4.30491e+08	2.93045e+08	5.17931e+08	3.64881e+08	2.85431e+08	4.23838e+08	4.23959e+08
n/a	High	Master Protein	O00159-3	Isoform 3 of Unconventional myosin-Ic [OS=Homo sapiens]		0	32	32	289	31	1044	119.6	9.45	197.47	cell organization and biogenesis;regulation of biological process;response to stimulus;transport	cytoplasm;cytosol;membrane	catalytic activity;motor activity;nucleotide binding;protein binding	Pf00063, Pf06017	4641	ENSG00000197879.14	MYO1C	17	Insulin Signaling		B-WICH complex positively regulates rRNA expression	5	0.176	100	100	100	7.57714e+08	2.36276e+08	6.48751e+08	264149	1.49974e+06	16.38	33.31	25.42	68.25	42.54	5.97607e+08	8.30977e+08	7.57714e+08	1.89575e+08	3.58202e+08	2.36276e+08	4.24831e+08	6.48751e+08	7.13428e+08
n/a	High	Master Protein	P12814-1	Alpha-actinin-1 [OS=Homo sapiens]		0	57	46	470	31	892	103	5.41	445.01	cell differentiation;cell organization and biogenesis;regulation of biological process;transport	cytoplasm;cytoskeleton;cytosol;extracellular;membrane;organelle lumen	metal ion binding;protein binding;RNA binding	Pf00036, Pf00307, Pf00435, Pf08726, Pf11971, Pf13405, Pf13499	87	ENSG00000072110.13	ACTN1	14	Arrhythmogenic Right Ventricular Cardiomyopathy; Focal Adhesion; Regulation of Actin Cytoskeleton	Systemic lupus erythematosus; Adherens junction; Arrhythmogenic right ventricular cardiomyopathy (ARVC); Leukocyte transendothelial migration; Focal adhesion; Amoebiasis; Regulation of actin cytoskeleton; Tight junction; Viral carcinogenesis	Platelet degranulation ; Nephrin family interactions; Regulation of cytoskeletal remodeling and cell spreading by IPP complex components; Syndecan interactions	24	1.389	100	100	100	8.35833e+08	5.97864e+08	1.28582e+09	1.83433e+06	1.32062e+06	13.06	7.88	21	2.83	28.4	8.35833e+08	7.35726e+08	9.55544e+08	5.87655e+08	5.97864e+08	6.7709e+08	9.13023e+08	1.39158e+09	1.28582e+09
n/a	High	Master Protein	P33241	Lymphocyte-specific protein 1 [OS=Homo sapiens]		0	51	14	138	14	339	37.2	4.74	171.67	cellular component movement;defense response;regulation of biological process;response to stimulus	cytoskeleton;membrane	protein binding;signal transducer activity	Pf02029	4046	ENSG00000130592.15	LSP1	11		Tuberculosis		1	10.035	100	100	100	8.39512e+08	7.04816e+08	9.351e+08	305649	30456.8	18.26	28.27	26.69	15.75	143.48	6.12815e+08	8.39512e+08	8.72939e+08	5.8045e+08	9.9962e+08	7.04816e+08	5.74159e+08	9.351e+08	9.75954e+08
n/a	High	Master Protein	P13647	keratin, type II cytoskeletal 5 [OS=Homo sapiens]		0	57	45	375	27	590	62.3	7.74	396.38	cell death;cell organization and biogenesis;metabolic process	cytoplasm;cytosol;membrane;mitochondrion;nucleus	catalytic activity;motor activity;protein binding;structural molecule activity	Pf00038, Pf01576, Pf02994, Pf03961, Pf04111, Pf05957, Pf12128	3852	ENSG00000186081.11	KRT5	12			Formation of the cornified envelope; Type I hemidesmosome assembly	6	1.388	20.471	17.568	19.682	8.0895e+07	7.77776e+07	6.94227e+07	5.48674e+06	3.95162e+06	20.75	32.6	31.35	15.82	94.7	5.52891e+07	8.18968e+07	8.0895e+07	5.75889e+07	1.10543e+08	7.77776e+07	4.2545e+07	6.94227e+07	8.23453e+07
n/a	High	Master Protein	P06753-2	Isoform 2 of Tropomyosin alpha-3 chain [OS=Homo sapiens]		0	74	30	332	8	248	29	4.78	196.43	cell organization and biogenesis;cellular component movement	cytoskeleton;cytosol	protein binding;structural molecule activity	Pf00261, Pf12718	7170	ENSG00000143549.19	TPM3	1	Striated Muscle Contraction			1	4.208	100	100	100	8.24552e+08	3.223e+08	8.68906e+08	2.99123e+06	710834	13.39	28.91	24.58	10.19	64.72	6.51504e+08	8.35321e+08	8.24552e+08	2.60824e+08	4.5674e+08	3.223e+08	5.69321e+08	8.68906e+08	9.3359e+08
n/a	High	Master Protein	P05023	Sodium/potassium-transporting ATPase subunit alpha-1 [OS=Homo sapiens]		0	31	30	328	21	1023	112.8	5.49	284.38	cell communication;cellular homeostasis;metabolic process;regulation of biological process;response to stimulus;transport	endoplasmic reticulum;endosome;Golgi;membrane	catalytic activity;metal ion binding;nucleotide binding;protein binding;transporter activity	Pf00122, Pf00689, Pf00690, Pf00702, Pf08282, Pf12710, Pf13246	476	ENSG00000163399.15	ATP1A1	1	Preimplantation Embryo	Protein digestion and absorption; Cardiac muscle contraction; Aldosterone-regulated sodium reabsorption; Thyroid hormone signaling pathway; cGMP-PKG signaling pathway; Gastric acid secretion; Thyroid hormone synthesis; cAMP signaling pathway; Insulin secretion; Salivary secretion; Proximal tubule bicarbonate reclamation; Carbohydrate digestion and absorption; Endocrine and other factor-regulated …	Ion homeostasis; Ion transport by P-type ATPases	24	5.634	100	100	100	8.53889e+08	7.21376e+07	6.18278e+08	1.75959e+06	312298	13.13	24.71	26.3	16.82	13.68	6.8694e+08	8.53889e+08	8.83955e+08	5.99206e+07	9.69393e+07	7.21376e+07	3.89816e+08	6.18278e+08	6.62891e+08
n/a	High	Master Protein	P51991-1	Heterogeneous nuclear ribonucleoprotein A3 [OS=Homo sapiens]		0	50	19	233	4	378	39.6	9.01	203.14	metabolic process;transport	cytoplasm;nucleus;spliceosomal complex	protein binding;RNA binding;transporter activity	Pf00076, Pf13893, Pf14259	220988	ENSG00000170144.20	HNRNPA3	2		Spliceosome	mRNA Splicing - Major Pathway	5	0.218	100	100	100	3.22668e+08	6.48223e+07	3.71133e+08	133222	611159	14.19	28.26	25.84	41.62	51.52	2.65843e+08	3.53716e+08	3.22668e+08	5.09498e+07	8.9081e+07	6.48223e+07	2.40091e+08	3.71133e+08	4.06433e+08
n/a	High	Master Protein	P02788-2	Isoform DeltaLf of Lactotransferrin [OS=Homo sapiens]		0	46	28	188	3	666	73.1	7.85	167.44	cellular homeostasis;defense response;metabolic process;regulation of biological process;response to stimulus;transport	cell surface;cytoplasm;extracellular;nucleus;organelle lumen	catalytic activity;DNA binding;enzyme regulator activity;metal ion binding;protein binding	Pf00405	4057	ENSG00000012223.12	LTF	3				0	12.847	100	100	100	5.40864e+07	3.1391e+08	4.14909e+07	2.65799e+06	206902	16.08	22.32	31.82	8.24	21.29	4.57999e+07	6.32857e+07	5.40864e+07	2.82533e+08	4.27328e+08	3.1391e+08	2.38214e+07	4.14909e+07	4.63098e+07
n/a	High	Master Protein	P13796	Plastin-2 [OS=Homo sapiens]		0	45	26	167	22	627	70.2	5.43	177.37	cell organization and biogenesis;cellular component movement;regulation of biological process;response to stimulus	cytoplasm;cytoskeleton;cytosol;membrane	metal ion binding;protein binding	Pf00036, Pf00307, Pf13405, Pf13499	3936	ENSG00000136167.13	LCP1	13			Gene and protein expression by JAK-STAT signaling after Interleukin-12 stimulation; Interleukin-12 family signaling	5	100	100	100	100	6.51774e+07	1.56344e+08	5.48997e+07	3.62437e+06	27571.5	19.85	26.66	7.71	19.4	129.13	4.6265e+07	6.51774e+07	6.82018e+07	1.22832e+08	2.08872e+08	1.56344e+08	4.86837e+07	5.48997e+07	5.64563e+07
n/a	High	Master Protein	P22626	heterogeneous nuclear ribonucleoproteins A2/B1 [OS=Homo sapiens]		0	59	21	269	20	353	37.4	8.95	242.23	metabolic process;regulation of biological process;response to stimulus;transport	cytoplasm;extracellular;membrane;nucleus;spliceosomal complex	DNA binding;protein binding;RNA binding	Pf00076, Pf13893, Pf14259	3181	ENSG00000122566.20	HNRNPA2B1	7	mRNA Processing		Gene and protein expression by JAK-STAT signaling after Interleukin-12 stimulation; Interleukin-12 family signaling; mRNA Splicing - Major Pathway	10	2.971	100	100	100	2.77553e+08	5.46326e+07	4.03176e+08	1.47894e+06	497803	9.01	13.32	20.59	25.27	52.76	2.41515e+08	2.87566e+08	2.77553e+08	4.99035e+07	6.4611e+07	5.46326e+07	2.80267e+08	4.03176e+08	4.17948e+08
n/a	High	Master Protein	P47756-2	Isoform 2 of F-actin-capping protein subunit beta [OS=Homo sapiens]		0	61	19	367	19	272	30.6	6	267.76	cell organization and biogenesis;cellular component movement;coagulation;regulation of biological process;transport	cytoplasm;cytoskeleton;cytosol	protein binding	Pf01115	832	ENSG00000077549.17	CAPZB	1				0	17.619	100	100	100	5.89296e+08	3.03738e+08	6.25976e+08	1.51827e+06	86171.7	17.77	32.43	26.17	13.77	53.52	4.48467e+08	6.40395e+08	5.89296e+08	2.36684e+08	4.45408e+08	3.03738e+08	3.94283e+08	6.25976e+08	6.67551e+08
n/a	High	Master Protein	Q86YZ3	Hornerin [OS=Homo sapiens]		0	14	14	93	14	2850	282.2	10.04	112.72	cell organization and biogenesis;development;transport	cytoplasm;cytoskeleton;extracellular;nucleus;organelle lumen	metal ion binding		388697	ENSG00000197915.5	HRNR	1			Neutrophil degranulation	3	3.661	35.319	26.54	10.702	2.84023e+07	8.60655e+06	2.13429e+07	2.94378e+06	804171	15.3	15.57	20.94	64.84	46.99	2.16534e+07	2.8819e+07	2.84023e+07	8.60655e+06	1.03164e+07	7.59304e+06	1.45784e+07	2.13429e+07	2.17401e+07
n/a	High	Master Protein	P55072	Transitional endoplasmic reticulum ATPase [OS=Homo sapiens]		0	44	30	179	30	806	89.3	5.26	93.21	cell communication;cell organization and biogenesis;metabolic process;regulation of biological process;response to stimulus;transport	cytoplasm;cytosol;endoplasmic reticulum;extracellular;membrane;nucleus;organelle lumen;proteasome	catalytic activity;enzyme regulator activity;nucleotide binding;protein binding;RNA binding	Pf00004, Pf00910, Pf01057, Pf01078, Pf02359, Pf02933, Pf05496, Pf05673, Pf06068, Pf07724, Pf07726, Pf07728, Pf09336, Pf13191, Pf13207, Pf13401	7415	ENSG00000165280.15	VCP	9		Legionellosis; Protein processing in endoplasmic reticulum	Protein methylation; Translesion Synthesis by POLH; N-glycan trimming in the ER and Calnexin/Calreticulin cycle; Josephin domain DUBs; Ovarian tumor domain proteases; ABC-family proteins mediated transport; HSF1 activation; Hh mutants that don't undergo autocatalytic processing are degraded by ERAD; E3 ubiquitin ligases ubiquitinate target proteins; Neutrophil degranulation; Defective CFTR causes…	35	0.521	100	100	49.698	2.97645e+08	1.13343e+08	2.39793e+08	1.1878e+06	2.28063e+06	13.25	23.8	24.33	34.9	27.8	2.4158e+08	3.13114e+08	2.97645e+08	1.04429e+08	1.60249e+08	1.13343e+08	1.56958e+08	2.39793e+08	2.55327e+08
n/a	High	Master Protein	P61978	Heterogeneous nuclear ribonucleoprotein K [OS=Homo sapiens]		0	49	19	240	19	463	50.9	5.54	209.53	metabolic process;regulation of biological process;response to stimulus	cytoplasm;membrane;nucleus;spliceosomal complex	DNA binding;protein binding;RNA binding	Pf00013, Pf08067, Pf13014, Pf13083	3190	ENSG00000165119.20	HNRNPK	9	mRNA Processing	Herpes simplex infection; MicroRNAs in cancer; Spliceosome; Viral carcinogenesis	mRNA Splicing - Major Pathway; SUMOylation of RNA binding proteins	14	55.335	100	100	100	3.05702e+08	7.52387e+07	3.0215e+08	2.64521e+06	47803.6	16.92	26.94	22.77	80.66	84.14	2.36241e+08	3.31506e+08	3.05702e+08	6.34999e+07	1.0606e+08	7.52387e+07	2.06757e+08	3.0215e+08	3.26935e+08
n/a	High	Master Protein	P06576	ATP synthase subunit beta, mitochondrial [OS=Homo sapiens]		0	47	16	219	16	529	56.5	5.4	178.01	cell differentiation;cell organization and biogenesis;cellular homeostasis;metabolic process;regulation of biological process;transport	cell surface;membrane;mitochondrion;nucleus;organelle lumen	catalytic activity;nucleotide binding;protein binding;transporter activity	Pf00006, Pf00306, Pf02874	506	ENSG00000110955.8	ATP5B	12	Electron Transport Chain; Oxidative phosphorylation	Metabolic pathways; Parkinson's disease; Alzheimer's disease; Oxidative phosphorylation; Huntington's disease	Transcriptional activation of mitochondrial biogenesis; Cristae formation; Mitochondrial protein import; Formation of ATP by chemiosmotic coupling; Metabolism of proteins	17	12.579	100	100	100	3.72808e+08	1.86471e+08	5.51258e+08	1.77469e+06	141082	18.83	28.85	27.55	0.38	118.53	2.64637e+08	3.76881e+08	3.72808e+08	1.36073e+08	2.45142e+08	1.86471e+08	3.36008e+08	5.51258e+08	5.85502e+08
n/a	High	Master Protein	P80723	Brain acid soluble protein 1 [OS=Homo sapiens]		0	75	11	73	11	227	22.7	4.63	104	cell differentiation;cell organization and biogenesis;regulation of biological process	cytoplasm;cytoskeleton;membrane;nucleus	DNA binding;protein binding		10409	ENSG00000176788.8	BASP1	5				0	21.796	0.247	24.707	100	7911.64	1.77991e+07	792124	698822	32061.3		3.4	78.81	23.88				7911.64	1.78027e+07	1.77991e+07	1.67729e+07	2.57405e+06	792124	679544
n/a	High	Master Protein	P63244	Receptor of activated protein C kinase 1 [OS=Homo sapiens]		0	61	14	145	14	317	35.1	7.69	171.65	cell death;cellular homeostasis;development;metabolic process;regulation of biological process;response to stimulus	cytoplasm;cytosol;membrane;mitochondrion;nucleus;ribosome	enzyme regulator activity;protein binding;RNA binding;structural molecule activity	Pf00400	10399	ENSG00000204628.11	GNB2L1; RACK1	5	Androgen receptor signaling pathway; Brain-Derived Neurotrophic Factor (BDNF) signaling pathway; VEGFA-VEGFR2 Signaling Pathway; Interferon type I signaling pathways	Measles	Regulation of TNFR1 signaling; TNFR1-mediated ceramide production; TNFR1-induced NFkappaB signaling pathway	11	0.918	100	100	100	7.27075e+07	8.83526e+07	7.58379e+07	47615.3	51851.2	21.32	16.33	26.16	39.03	99.8	4.9161e+07	7.27075e+07	7.37395e+07	7.34643e+07	1.02208e+08	8.83526e+07	4.62225e+07	7.58379e+07	7.65947e+07
n/a	High	Master Protein	P31146	Coronin-1A [OS=Homo sapiens]		0	40	27	273	26	461	51	6.68	167.48	cell organization and biogenesis;cellular component movement;defense response;regulation of biological process;response to stimulus;transport	cytoplasm;cytoskeleton;cytosol;endosome;membrane;nucleus	protein binding;RNA binding	Pf00400, Pf08953, Pf08954, Pf13094, Pf13863	11151	ENSG00000102879.15	CORO1A	16		Phagosome; Tuberculosis		2	23.414	100	100	100	1.59269e+08	9.61465e+08	1.57657e+08	8.68187e+06	370795	12.34	7.69	17.72	13.16	103.2	1.59269e+08	1.30599e+08	1.65839e+08	9.61465e+08	1.09415e+09	9.59059e+08	1.27775e+08	1.83066e+08	1.57657e+08
n/a	High	Master Protein	P07355	Annexin A2 [OS=Homo sapiens]		0	58	23	245	23	339	38.6	7.75	230.32	cell organization and biogenesis;metabolic process;regulation of biological process;response to stimulus;transport	cell surface;cytoplasm;cytosol;endoplasmic reticulum;endosome;extracellular;membrane;nucleus;organelle lumen	enzyme regulator activity;metal ion binding;protein binding;RNA binding	Pf00191	302	ENSG00000182718.16	ANXA2	15	Prostaglandin Synthesis and Regulation		Dissolution of Fibrin Clot; Gene and protein expression by JAK-STAT signaling after Interleukin-12 stimulation; Smooth Muscle Contraction; Neutrophil degranulation; Interleukin-12 family signaling	12	1.342	100	100	100	3.11076e+08	1.18277e+08	3.38964e+08	567201	422528	10.46	31.28	30.22	6.81	121.18	2.62263e+08	3.20232e+08	3.11076e+08	8.76819e+07	1.64395e+08	1.18277e+08	2.09164e+08	3.38964e+08	3.94042e+08
n/a	High	Master Protein	P04075	fructose-bisphosphate aldolase A [OS=Homo sapiens]		0	68	22	205	22	364	39.4	8.09	125.28	cell organization and biogenesis;cellular homeostasis;metabolic process;regulation of biological process;transport	cytoplasm;cytoskeleton;cytosol;extracellular;membrane;nucleus;organelle lumen	catalytic activity;protein binding;RNA binding	Pf00274	226	ENSG00000149925.17	ALDOA	16	Glycolysis and Gluconeogenesis; Sudden Infant Death Syndrome (SIDS) Susceptibility Pathways	Carbon metabolism; Metabolic pathways; Pentose phosphate pathway; HIF-1 signaling pathway; Glycolysis / Gluconeogenesis; Biosynthesis of amino acids; Fructose and mannose metabolism	Platelet degranulation ; Gluconeogenesis; Glycolysis; Neutrophil degranulation	21	3.735	100	100	100	4.78139e+08	1.50746e+08	3.21623e+08	4.32381e+06	1.15774e+06	18.32	27.92	21.74	2.22	71.91	3.87426e+08	5.61656e+08	4.78139e+08	1.37553e+08	2.26295e+08	1.50746e+08	2.24493e+08	3.21623e+08	3.47243e+08
n/a	High	Master Protein	Q14204	Cytoplasmic dynein 1 heavy chain 1 [OS=Homo sapiens]		0	12	49	206	49	4646	532.1	6.4	115.6	cell division;cell organization and biogenesis;cellular component movement;regulation of biological process;transport	cytoplasm;cytoskeleton;cytosol;extracellular;membrane;organelle lumen	catalytic activity;motor activity;nucleotide binding;protein binding;RNA binding	Pf00769, Pf03028, Pf03915, Pf04156, Pf07246, Pf07728, Pf08385, Pf08393, Pf12774, Pf12775, Pf12777, Pf12780, Pf12781, Pf13173, Pf13207, Pf13401	1778	ENSG00000197102.10	DYNC1H1	14		Salmonella infection; Vasopressin-regulated water reabsorption; Phagosome	COPI-independent Golgi-to-ER retrograde traffic; Regulation of PLK1 Activity at G2/M Transition; AURKA Activation by TPX2; Anchoring of the basal body to the plasma membrane; Recruitment of NuMA to mitotic centrosomes; Recruitment of mitotic centrosome proteins and complexes; Loss of Nlp from mitotic centrosomes; Amplification of signal from unattached kinetochores via a MAD2 inhibitory signal; N…	50	47.6	100	100	100	2.31576e+08	7.4672e+07	1.45556e+08	4.28803e+06	90083.9	12.93	29.03	20.47	16.75	53.05	1.88323e+08	2.42174e+08	2.31576e+08	6.31165e+07	1.09035e+08	7.4672e+07	1.00624e+08	1.45556e+08	1.48886e+08
n/a	High	Master Protein	Q29963	HLA class I histocompatibility antigen, Cw-6 alpha chain [OS=Homo sapiens]		0	45	12	82	3	366	40.9	6	103.51	regulation of biological process;response to stimulus	cell surface;endoplasmic reticulum;Golgi;membrane	protein binding	Pf00129, Pf07654	3107	ENSG00000228299.9	HLA-C	6; CHR_HSCHR6_MHC_DBB_CTG1	Proteasome Degradation; Allograft Rejection		Interferon alpha/beta signaling; ER-Phagosome pathway; Immunoregulatory interactions between a Lymphoid and a non-Lymphoid cell; Endosomal/Vacuolar pathway; Interferon gamma signaling; Antigen Presentation: Folding, assembly and peptide loading of class I MHC	14	100	100	100	100	3.53073e+06	7.61329e+06	7.26736e+06	1.4339e+06		86.28	75.9	80.98	15.74		8.47626e+06	1.08498e+06	3.53073e+06	1.45064e+07	2.2202e+06	7.61329e+06	1.83459e+07	7.26736e+06	3.29076e+06
n/a	High	Master Protein	P06396	Gelsolin [OS=Homo sapiens]		0	32	27	153	27	782	85.6	6.28	87.59	cell death;cell organization and biogenesis;metabolic process;regulation of biological process;response to stimulus;transport	cytoplasm;cytoskeleton;cytosol;extracellular;membrane;nucleus;organelle lumen	metal ion binding;protein binding	Pf00626	2934	ENSG00000148180.19	GSN	9	Regulation of Actin Cytoskeleton; Senescence and Autophagy in Cancer	Regulation of actin cytoskeleton; Fc gamma R-mediated phagocytosis; Viral carcinogenesis	Neutrophil degranulation; Caspase-mediated cleavage of cytoskeletal proteins; Amyloid fiber formation	15	99.842	100	100	100	3.1907e+09	2.5141e+09	2.99135e+09	1.64617e+07	164877	25.06	30.76	31.12	32.08	66.54	2.09803e+09	3.49246e+09	3.1907e+09	1.79103e+09	3.36137e+09	2.5141e+09	1.73033e+09	2.99135e+09	3.30212e+09
n/a	High	Master Protein	Q09666-1	Neuroblast differentiation-associated protein AHNAK [OS=Homo sapiens]		0	13	30	205	30	5890	628.7	6.15	156.94	cell organization and biogenesis;regulation of biological process	cytoplasm;cytoskeleton;cytosol;membrane;nucleus	protein binding;RNA binding;structural molecule activity		79026	ENSG00000124942.13	AHNAK	11				0	1.26	100	100	100	4.86243e+08	7.81279e+07	3.84959e+08	566657	449831	19.92	32.12	33.05	9.85	74.52	3.48623e+08	5.17395e+08	4.86243e+08	6.08071e+07	1.13882e+08	7.81279e+07	2.12206e+08	3.84959e+08	4.23166e+08
n/a	High	Master Protein	P62805	histone H4 [OS=Homo sapiens]		0	67	16	213	16	103	11.4	11.36	135.03	cell organization and biogenesis;metabolic process;regulation of biological process;response to stimulus	chromosome;extracellular;membrane;nucleus	DNA binding;protein binding;RNA binding	Pf00125, Pf02969, Pf15630	8359; 8361; 8360; 8363; 8370; 554313; 8365; 8364; 121504; 8367; 8294; 8366; 8362; 8368	ENSG00000197061.4; ENSG00000275126.1; ENSG00000273542.1; ENSG00000197238.4; ENSG00000197837.3; ENSG00000276966.2; ENSG00000158406.4; ENSG00000270882.2; ENSG00000274618.1; ENSG00000278637.1; ENSG00000277157.1; ENSG00000278705.1; ENSG00000270276.2; ENSG00000276180.1	HIST1H4A; HIST1H4F; HIST1H4D; HIST1H4J; HIST2H4A; HIST2H4B; HIST1H4H; HIST1H4C; HIST4H4; HIST1H4E; HIST1H4I; HIST1H4B; HIST1H4K; HIST1H4L	6; 1; 12	Gastric Cancer Network 1; Histone Modifications; Type II interferon signaling (IFNG)	Viral carcinogenesis; Systemic lupus erythematosus; Alcoholism	SIRT1 negatively regulates rRNA expression; RMTs methylate histone arginines; Nonhomologous End-Joining (NHEJ); Activation of anterior HOX genes in hindbrain development during early embryogenesis; NoRC negatively regulates rRNA expression; Meiotic synapsis; Transcriptional regulation by small RNAs; Meiotic recombination; PRC2 methylates histones and DNA; Recruitment and ATM-mediated phosphorylat…	82	1.709	100	100	27.84	7.32962e+08	1.43025e+08	5.56676e+08	8.78062e+06	5.13743e+06	15.58	30.47	24.31	11.25	43.8	6.85734e+08	7.32962e+08	9.15322e+08	9.85029e+07	1.8517e+08	1.43025e+08	3.53493e+08	5.63998e+08	5.56676e+08
n/a	High	Master Protein	P30101	Protein disulfide-isomerase A3 [OS=Homo sapiens]		0	45	27	215	27	505	56.7	6.35	168.49	cellular homeostasis;metabolic process;regulation of biological process;response to stimulus;transport	cell surface;endoplasmic reticulum;membrane;nucleus;organelle lumen	catalytic activity;protein binding;RNA binding	Pf00085, Pf13098, Pf13848, Pf13899, Pf13905	2923	ENSG00000167004.12	PDIA3	15		Protein processing in endoplasmic reticulum; Antigen processing and presentation	ER-Phagosome pathway; Calnexin/calreticulin cycle; Antigen Presentation: Folding, assembly and peptide loading of class I MHC	13	58.911	100	100	100	2.83538e+08	1.32754e+08	5.23106e+08	2.95215e+06	50112.3	12.44	25.97	26.8	21.86	141.7	2.34607e+08	2.83538e+08	2.99781e+08	9.80497e+07	1.66897e+08	1.32754e+08	3.24087e+08	5.23106e+08	5.5551e+08
n/a	High	Master Protein	P49411	elongation factor Tu, mitochondrial [OS=Homo sapiens]		0	38	14	132	14	452	49.5	7.61	109.96	metabolic process;response to stimulus	membrane;mitochondrion	catalytic activity;nucleotide binding;protein binding;RNA binding	Pf00009, Pf03143, Pf03144	7284		TUFM	16			Mitochondrial translation elongation	4	31.184	100	100	100	1.74055e+08	6.54534e+07	2.12723e+08	2.50118e+06	80208	16.48	28.81	23.86	45.19	92.58	1.39028e+08	1.74055e+08	1.94065e+08	5.72564e+07	9.72395e+07	6.54534e+07	1.46098e+08	2.12723e+08	2.37982e+08
n/a	High	Master Protein	P21291	Cysteine and glycine-rich protein 1 [OS=Homo sapiens]		0	58	12	146	12	193	20.6	8.57	213.21		nucleus	metal ion binding;RNA binding	Pf00412	1465	ENSG00000159176.13	CSRP1	1	Mecp2 and Associated Rett Syndrome		MTF1 activates gene expression	4	8.206	100	100	100	1.48032e+08	5.89004e+07	1.60169e+08	112589	13720.7	4.48	51.59	14.59	53.48	40.77	1.47872e+08	1.59747e+08	1.48032e+08	1.3002e+08	5.55955e+07	5.89004e+07	1.35909e+08	1.82429e+08	1.60169e+08
n/a	High	Master Protein	P14625	Endoplasmin [OS=Homo sapiens]		0	38	31	254	30	803	92.4	4.84	132.09	cell organization and biogenesis;metabolic process;regulation of biological process;response to stimulus;transport	cytosol;endoplasmic reticulum;extracellular;membrane;nucleus;organelle lumen	metal ion binding;nucleotide binding;protein binding;RNA binding	Pf00183, Pf02518, Pf13589	7184	ENSG00000166598.14	HSP90B1	12	Photodynamic therapy-induced unfolded protein response; Focal Adhesion-PI3K-Akt-mTOR-signaling pathway; Sudden Infant Death Syndrome (SIDS) Susceptibility Pathways	PI3K-Akt signaling pathway; Protein processing in endoplasmic reticulum; Estrogen signaling pathway; Prostate cancer; Thyroid hormone synthesis; Pathways in cancer	Post-translational protein phosphorylation; Regulation of Insulin-like Growth Factor (IGF) transport and uptake by Insulin-like Growth Factor Binding Proteins (IGFBPs); ATF6 (ATF6-alpha) activates chaperone genes; Interleukin-4 and 13 signaling; Trafficking and processing of endosomal TLR; Scavenging by Class A Receptors	26	22.707	100	100	100	5.34295e+08	2.26137e+08	8.93249e+08	3.22507e+06	142031	17.39	26.7	24.23	9.36	79.74	3.94778e+08	5.34295e+08	5.51047e+08	1.89214e+08	3.1574e+08	2.26137e+08	5.73296e+08	8.93249e+08	9.19243e+08
n/a	High	Master Protein	P23528	Cofilin-1 [OS=Homo sapiens]		0	87	20	206	15	166	18.5	8.09	126.65	cell organization and biogenesis;cellular component movement;metabolic process;regulation of biological process;response to stimulus	cytoplasm;cytoskeleton;cytosol;membrane;nucleus	protein binding	Pf00241	1072	ENSG00000172757.12	CFL1	11	Brain-Derived Neurotrophic Factor (BDNF) signaling pathway; VEGFA-VEGFR2 Signaling Pathway; EGF/EGFR Signaling Pathway; Regulation of Actin Cytoskeleton; G13 Signaling Pathway	Axon guidance; Pertussis; Fc gamma R-mediated phagocytosis; Regulation of actin cytoskeleton	Platelet degranulation ; Sema3A PAK dependent Axon repulsion; Gene and protein expression by JAK-STAT signaling after Interleukin-12 stimulation; EPHB-mediated forward signaling; Regulation of actin dynamics for phagocytic cup formation; Interleukin-12 family signaling	27	30.128	100	100	100	3.41712e+08	3.7182e+08	4.62551e+08	4.03709e+06	134000	16.8	29.37	37.51	10.13	140.17	2.63248e+08	3.41712e+08	3.67952e+08	2.75112e+08	4.9875e+08	3.7182e+08	2.31068e+08	4.62551e+08	5.1512e+08
n/a	High	Master Protein	P52790	Hexokinase-3 [OS=Homo sapiens]		0	24	19	94	19	923	99	5.4	94.71	cellular homeostasis;metabolic process;transport	cytosol;extracellular;mitochondrion;organelle lumen	catalytic activity;nucleotide binding	Pf00349, Pf03727	3101	ENSG00000160883.10	HK3	5	Glycolysis and Gluconeogenesis	Neomycin, kanamycin and gentamicin biosynthesis; Carbon metabolism; Insulin signaling pathway; Carbohydrate digestion and absorption; Starch and sucrose metabolism; Galactose metabolism; HIF-1 signaling pathway; Metabolic pathways; Glycolysis / Gluconeogenesis; Amino sugar and nucleotide sugar metabolism; Fructose and mannose metabolism; Type II diabetes mellitus; Central carbon metabolism in can…	Glycolysis; Neutrophil degranulation	21	4.343	92.242	100	63.54	5.10868e+07	3.51904e+07	6.42652e+07	2.40541e+06	553831	18.48	53.61	31.01	6.72	79.49	3.78549e+07	5.46438e+07	5.10868e+07	2.62774e+07	7.10038e+07	3.51904e+07	3.66248e+07	6.42652e+07	6.93023e+07
n/a	High	Master Protein	P05164-2	Isoform H14 of Myeloperoxidase [OS=Homo sapiens]		0	37	30	156	30	650	73.8	9.11	114.27	cell organization and biogenesis;defense response;metabolic process;regulation of biological process;response to stimulus;transport	extracellular;mitochondrion;nucleus;organelle lumen;vacuole	antioxidant activity;catalytic activity;metal ion binding	Pf03098	4353		MPO	17	Selenium Micronutrient Network; Vitamin B12 Metabolism; Folate Metabolism; Benzene metabolism			4	19.963	100	100	100	1.18618e+08	1.92527e+08	1.4604e+08	5.52176e+06	276604	19.63	24.59	24.89	17.82	10.28	1.18618e+08	1.0212e+08	1.49874e+08	1.5366e+08	2.50883e+08	1.92527e+08	9.82834e+07	1.4604e+08	1.63717e+08
n/a	High	Master Protein	Q96C19	EF-hand domain-containing protein D2 [OS=Homo sapiens]		0	48	17	221	17	240	26.7	5.2	178.38		membrane	metal ion binding;protein binding		79180	ENSG00000142634.12	EFHD2	1				0	6.812	100	100	100	5.78584e+08	5.17574e+08	7.99089e+08	1.20198e+06	176438	15.31	30.58	28.27	25.2	44.55	4.467e+08	5.78584e+08	5.99748e+08	4.32343e+08	7.69355e+08	5.17574e+08	4.72479e+08	7.99089e+08	8.29699e+08
n/a	High	Master Protein	P08779	Keratin, type I cytoskeletal 16 [OS=Homo sapiens]		0	56	33	247	15	473	51.2	5.05	377.59	cell death;cell differentiation;cell organization and biogenesis;cell proliferation;cellular component movement;defense response;regulation of biological process;response to stimulus	cytoskeleton;cytosol;nucleus	protein binding;structural molecule activity	Pf00038, Pf07888, Pf13514	3868	ENSG00000186832.8	KRT16	17			Formation of the cornified envelope	3	0.778	23.248	14.368	16.27	1.8946e+07	1.32591e+07	1.1709e+07	634353	814959	25.78	27.73	10.51	24.92	127.96	1.47147e+07	2.47083e+07	1.8946e+07	1.32591e+07	1.71469e+07	9.73061e+06	1.1709e+07	1.16505e+07	1.3943e+07
n/a	High	Master Protein	P52907	F-actin-capping protein subunit alpha-1 [OS=Homo sapiens]		0	64	14	123	12	286	32.9	5.69	79.66	cell organization and biogenesis;cellular component movement;coagulation;defense response;regulation of biological process;response to stimulus;transport	cytoplasm;cytoskeleton;cytosol;extracellular	protein binding	Pf01267	829	ENSG00000116489.12	CAPZA1	1		Endocytosis	COPI-independent Golgi-to-ER retrograde traffic; Gene and protein expression by JAK-STAT signaling after Interleukin-12 stimulation; Advanced glycosylation endproduct receptor signaling; Factors involved in megakaryocyte development and platelet production; COPI-mediated anterograde transport; MHC class II antigen presentation; HSP90 chaperone cycle for steroid hormone receptors (SHR); Interleuki…	26	9.074	100	100	100	1.35248e+08	1.1316e+08	1.36362e+08	803574	88562.1	43.3	29.07	22.22	21.37	49.63	1.52985e+08	5.87405e+07	1.35248e+08	8.00403e+07	1.45714e+08	1.1316e+08	1.00183e+08	1.58034e+08	1.36362e+08
n/a	High	Master Protein	P62701	40S ribosomal protein S4, X isoform [OS=Homo sapiens]		0	60	18	194	18	263	29.6	10.15	136.84	cell organization and biogenesis;development;metabolic process;regulation of biological process;transport	cytoplasm;cytosol;membrane;ribosome	protein binding;RNA binding;structural molecule activity	Pf00900, Pf08071	6191	ENSG00000198034.10	RPS4X	X	Cytoplasmic Ribosomal Proteins	Ribosome	Peptide chain elongation; Eukaryotic Translation Termination; Viral mRNA Translation; Formation of the ternary complex, and subsequently, the 43S complex; L13a-mediated translational silencing of Ceruloplasmin expression; Selenocysteine synthesis; Nonsense Mediated Decay (NMD) independent of the Exon Junction Complex (EJC); Nonsense Mediated Decay (NMD) enhanced by the Exon Junction Complex (EJC)…	38	2.241	100	100	100	4.89924e+08	2.46705e+08	4.21329e+08	745593	332671	16.76	32.44	25.26	10.56	30.26	3.61459e+08	4.93161e+08	4.89924e+08	2.06888e+08	3.78832e+08	2.46705e+08	2.6308e+08	4.21329e+08	4.29471e+08
n/a	High	Master Protein	Q02878	60S ribosomal protein L6 [OS=Homo sapiens]		0	36	20	197	20	288	32.7	10.58	99.55	cell organization and biogenesis;metabolic process;regulation of biological process;transport	cytosol;membrane;nucleus;ribosome	DNA binding;protein binding;RNA binding;structural molecule activity	Pf01159, Pf03868	6128	ENSG00000089009.15	RPL6	12	Cytoplasmic Ribosomal Proteins	Ribosome	Peptide chain elongation; Eukaryotic Translation Termination; Viral mRNA Translation; L13a-mediated translational silencing of Ceruloplasmin expression; Nonsense Mediated Decay (NMD) independent of the Exon Junction Complex (EJC); Selenocysteine synthesis; Nonsense Mediated Decay (NMD) enhanced by the Exon Junction Complex (EJC); GTP hydrolysis and joining of the 60S ribosomal subunit; Major path…	34	1.378	100	100	100	6.78977e+08	2.83929e+08	7.19459e+08	1.30806e+06	949039	11.58	26.32	23.5	1.31	82.48	5.8099e+08	6.78977e+08	7.32753e+08	2.37509e+08	3.93858e+08	2.83929e+08	4.65725e+08	7.19459e+08	7.316e+08
n/a	High	Master Protein	P10809	60 kDa heat shock protein, mitochondrial [OS=Homo sapiens]		0	35	20	187	20	573	61	5.87	144.93	cell organization and biogenesis;cell proliferation;metabolic process;regulation of biological process;response to stimulus;transport	cell surface;cytoplasm;cytosol;endosome;membrane;mitochondrion;organelle lumen	catalytic activity;DNA binding;nucleotide binding;protein binding;RNA binding	Pf00118	3329	ENSG00000144381.16	HSPD1	2	Apoptosis-related network due to altered Notch3 in ovarian cancer; Sudden Infant Death Syndrome (SIDS) Susceptibility Pathways	RNA degradation; Legionellosis; Type I diabetes mellitus; Tuberculosis	TFAP2A acts as a transcriptional repressor during retinoic acid induced cell differentiation; Mitochondrial protein import; Metabolism of proteins	13	1.514	100	100	100	1.47842e+08	6.56473e+07	1.73235e+08	545514	360398	9.65	31.2	25.51	4.05	86.7	1.36071e+08	1.47842e+08	1.64777e+08	5.02162e+07	9.31313e+07	6.56473e+07	1.0939e+08	1.73235e+08	1.81485e+08
n/a	High	Master Protein	P31943	Heterogeneous nuclear ribonucleoprotein H [OS=Homo sapiens]		0	34	11	130	8	449	49.2	6.3	131.56	metabolic process;regulation of biological process;response to stimulus	cytosol;membrane;nucleus;spliceosomal complex	protein binding;RNA binding	Pf00076, Pf08080, Pf14259	3187	ENSG00000169045.17; ENSG00000284254.1	HNRNPH1	5; CHR_HG30_PATCH	Mecp2 and Associated Rett Syndrome; mRNA Processing		mRNA Splicing - Major Pathway; FGFR2 alternative splicing	11	3.651	100	100	100	2.33119e+08	2.94331e+07	2.10855e+08	202759	55540.2	19.3	34.14	31.02	115.18	70.67	1.71963e+08	2.53328e+08	2.33119e+08	2.16052e+07	4.27088e+07	2.94331e+07	1.23948e+08	2.10855e+08	2.36787e+08
n/a	High	Master Protein	P21796	voltage-dependent anion-selective channel protein 1 [OS=Homo sapiens]		0	52	14	101	14	283	30.8	8.54	112.03	cell communication;cell death;cell differentiation;defense response;metabolic process;regulation of biological process;response to stimulus;transport	membrane;mitochondrion;nucleus	protein binding;transporter activity	Pf01459	7416	ENSG00000213585.10	VDAC1	5		Influenza A; cGMP-PKG signaling pathway; HTLV-I infection; Calcium signaling pathway; Parkinson's disease; Huntington's disease; NOD-like receptor signaling pathway	Mitochondrial calcium ion transport; Ub-specific processing proteases; Mitochondrial protein import; Pink/Parkin Mediated Mitophagy	16	0.083	100	100	100	9.29403e+07	4.33864e+07	9.76364e+07	22782.8	275651	23.21	28.09	35.32	87.98	17.95	6.0231e+07	9.36548e+07	9.29403e+07	3.0531e+07	5.45707e+07	4.33864e+07	5.10776e+07	1.07606e+08	9.76364e+07
n/a	High	Master Protein	P36578	60S ribosomal protein L4 [OS=Homo sapiens]		0	34	19	152	19	427	47.7	11.06	120.66	cell organization and biogenesis;metabolic process;transport	cytoplasm;cytosol;endoplasmic reticulum;membrane;nucleus;ribosome	protein binding;RNA binding;structural molecule activity	Pf00573, Pf14374	6124	ENSG00000174444.14	RPL4	15	Cytoplasmic Ribosomal Proteins	Ribosome	Peptide chain elongation; Eukaryotic Translation Termination; Viral mRNA Translation; L13a-mediated translational silencing of Ceruloplasmin expression; Nonsense Mediated Decay (NMD) independent of the Exon Junction Complex (EJC); Selenocysteine synthesis; Nonsense Mediated Decay (NMD) enhanced by the Exon Junction Complex (EJC); GTP hydrolysis and joining of the 60S ribosomal subunit; Major path…	34	3.967	100	100	100	2.37163e+08	1.17303e+08	2.32039e+08	489671	123432	19.61	23.69	21.39	7.21	91.81	2.37163e+08	1.82681e+08	2.72531e+08	1.17303e+08	8.26034e+07	1.34413e+08	1.68365e+08	2.60338e+08	2.32039e+08
n/a	High	Master Protein	O43175	D-3-phosphoglycerate dehydrogenase [OS=Homo sapiens]		0	25	11	123	11	533	56.6	6.71	107.89	metabolic process	cytosol	catalytic activity;nucleotide binding	Pf00389, Pf02826	26227	ENSG00000092621.11	PHGDH	1	Trans-sulfuration and one carbon metabolism	Carbon metabolism; Biosynthesis of amino acids; Metabolic pathways; Glycine, serine and threonine metabolism	Serine biosynthesis	9	0.859	100	100	100	2.34748e+08	4.87052e+07	1.16571e+08	78940.4	91919.4	22.65	32.16	31.84	71.64	52.18	1.54474e+08	2.38164e+08	2.34748e+08	3.30895e+07	6.44416e+07	4.87052e+07	6.49328e+07	1.16571e+08	1.25058e+08
n/a	High	Master Protein	Q16643	drebrin [OS=Homo sapiens]		0	27	19	177	19	649	71.4	4.45	76.74	cell communication;cell differentiation;cell organization and biogenesis;cell proliferation;development;regulation of biological process	cytoplasm;cytoskeleton;membrane	protein binding	Pf00241	1627	ENSG00000113758.13	DBN1	5				0	5.026	100	100	100	5.33305e+08	2.77011e+08	8.12441e+08	283172	56342.8	10.16	10.22	20.29	9.89	125.74	5.2435e+08	5.33305e+08	6.27313e+08	2.32356e+08	2.80742e+08	2.77011e+08	5.73502e+08	8.54336e+08	8.12441e+08
n/a	High	Master Protein	P38646	Stress-70 protein, mitochondrial [OS=Homo sapiens]		0	29	16	99	16	679	73.6	6.16	87.1	cell differentiation;cell organization and biogenesis;metabolic process;regulation of biological process;response to stimulus	cytoplasm;mitochondrion;nucleus;organelle lumen	nucleotide binding;protein binding;RNA binding	Pf00012, Pf06723	3313	ENSG00000113013.12	HSPA9	5	Parkin-Ubiquitin Proteasomal System pathway	Tuberculosis; RNA degradation	Gene and protein expression by JAK-STAT signaling after Interleukin-12 stimulation; Mitochondrial protein import; Regulation of HSF1-mediated heat shock response; Interleukin-12 family signaling; Cristae formation; Metabolism of proteins	17	3.544	100	100	100	5.13595e+07	1.98835e+07	3.5863e+07	267688	75533.9	22.74	16.18	30	37.21	130.67	5.13595e+07	3.7929e+07	6.04967e+07	1.98835e+07	1.49832e+07	2.0368e+07	2.07424e+07	3.82124e+07	3.5863e+07
n/a	High	Master Protein	P16615-3	Isoform 3 of Sarcoplasmic/endoplasmic reticulum calcium ATPase 2 [OS=Homo sapiens]		0	24	22	149	15	999	109.8	5.36	161.62	cell organization and biogenesis;cellular homeostasis;regulation of biological process;response to stimulus;transport	endoplasmic reticulum;membrane	catalytic activity;metal ion binding;nucleotide binding;protein binding;transporter activity	Pf00122, Pf00689, Pf00690, Pf00702, Pf08282, Pf12710, Pf13246	488		ATP2A2	12	Arrhythmogenic Right Ventricular Cardiomyopathy; Myometrial Relaxation and Contraction Pathways; Calcium Regulation in the Cardiac Cell			3	54.206	100	100	100	2.44196e+08	5.17161e+08	2.9272e+08	2.31803e+06	42763.3	11.21	34.55	18.76	14.15	109.36	2.12919e+08	2.66778e+08	2.44196e+08	4.10747e+08	7.95114e+08	5.17161e+08	2.07405e+08	2.9272e+08	2.94074e+08
n/a	High	Master Protein	P07237	Protein disulfide-isomerase [OS=Homo sapiens]		0	46	27	231	27	508	57.1	4.87	158.59	cell organization and biogenesis;cellular homeostasis;metabolic process;regulation of biological process;response to stimulus	endoplasmic reticulum;extracellular;membrane;organelle lumen	catalytic activity;metal ion binding;protein binding;RNA binding	Pf00085, Pf01216, Pf13098, Pf13848, Pf13899, Pf13905	5034	ENSG00000185624.14	P4HB	17		Protein processing in endoplasmic reticulum	Post-translational protein phosphorylation; Regulation of Insulin-like Growth Factor (IGF) transport and uptake by Insulin-like Growth Factor Binding Proteins (IGFBPs); VLDL assembly; Chylomicron assembly; Collagen biosynthesis and modifying enzymes; Interleukin-12 family signaling; Detoxification of Reactive Oxygen Species; Hedgehog ligand biogenesis	23	2.025	22.91	68.486	18.09	1.32668e+08	1.04754e+08	3.96593e+08	1.17265e+07	5.79085e+06	31.17	40.17	23.09	13.83	32.17	1.01179e+08	1.87733e+08	1.32668e+08	9.97698e+07	1.94771e+08	1.04754e+08	2.69411e+08	3.96593e+08	4.28806e+08
n/a	High	Master Protein	P61158	actin-related protein 3 [OS=Homo sapiens]		0	45	16	154	16	418	47.3	5.88	137.36	cell division;cell organization and biogenesis;cellular component movement;regulation of biological process;response to stimulus	cytoplasm;cytoskeleton;cytosol;membrane	nucleotide binding;protein binding;structural molecule activity	Pf00022	10096	ENSG00000115091.11	ACTR3	2	Association Between Physico-Chemical Features and Toxicity Associated Pathways		EPHB-mediated forward signaling; Clathrin-mediated endocytosis; RHO GTPases Activate WASPs and WAVEs; Regulation of actin dynamics for phagocytic cup formation	16	26.104	100	100	100	1.55376e+08	9.01493e+07	1.75954e+08	1.57593e+06	60372.3	15.55	24.08	26.07	16.58	63.34	1.21796e+08	1.65685e+08	1.55376e+08	6.99236e+07	1.13861e+08	9.01493e+07	1.10517e+08	1.75954e+08	1.86233e+08
n/a	High	Master Protein	P25705-1	ATP synthase subunit alpha, mitochondrial [OS=Homo sapiens]		0	41	19	151	19	553	59.7	9.13	128.19	cell organization and biogenesis;metabolic process;regulation of biological process;transport	membrane;mitochondrion;organelle lumen	catalytic activity;nucleotide binding;protein binding;RNA binding;transporter activity	Pf00006, Pf00306, Pf02663, Pf02874, Pf05943	498	ENSG00000152234.15	ATP5A1	18	Electron Transport Chain; Oxidative phosphorylation	Metabolic pathways; Parkinson's disease; Alzheimer's disease; Oxidative phosphorylation; Huntington's disease	Cristae formation; Mitochondrial protein import; Formation of ATP by chemiosmotic coupling; Metabolism of proteins	16	5.561	100	100	100	5.31554e+08	2.17549e+08	8.16322e+08	834528	150061	16.07	32.36	27.67	14.01	122.98	4.00822e+08	5.43076e+08	5.31554e+08	1.64486e+08	3.1236e+08	2.17549e+08	4.87037e+08	8.16322e+08	8.41745e+08
n/a	High	Master Protein	Q96PK6-1	RNA-binding protein 14 [OS=Homo sapiens]		0	28	16	168	16	669	69.4	9.67	184.76	cell organization and biogenesis;defense response;metabolic process;regulation of biological process;response to stimulus	cytoplasm;nucleus	protein binding;RNA binding	Pf00076, Pf13893, Pf14259	10432; 100526737	ENSG00000239306.4	RBM14; RBM14-RBM4	11			RUNX2 regulates bone development	5	1.388	100	100	100	1.69071e+08	3.95862e+07	2.07924e+08	419758	302398	15.74	32.46	24.13	28.92	19.34	1.40696e+08	1.93443e+08	1.69071e+08	3.95862e+07	6.66824e+07	3.92445e+07	1.52029e+08	2.07924e+08	2.49763e+08
n/a	High	Master Protein	P07900-2	Isoform 2 of Heat shock protein HSP 90-alpha [OS=Homo sapiens]		0	37	32	250	17	854	98.1	5.16	249.9	cell organization and biogenesis;metabolic process;regulation of biological process;response to stimulus;transport	cytoplasm;cytosol;extracellular;membrane;nucleus;organelle lumen	catalytic activity;enzyme regulator activity;nucleotide binding;protein binding;RNA binding	Pf00183, Pf02518, Pf13589	3320	ENSG00000080824.18	HSP90AA1	14	Nucleotide-binding Oligomerization Domain (NOD) pathway; TNF alpha Signaling Pathway; Corticotropin-releasing hormone signaling pathway; Aryl Hydrocarbon Receptor; EBV LMP1 signaling; Aryl Hydrocarbon Receptor Pathway; Constitutive Androstane Receptor Pathway; NRF2 pathway; VEGFA-VEGFR2 Signaling Pathway; Focal Adhesion-PI3K-Akt-mTOR-signaling pathway			10	0.652	100	100	97.103	1.47874e+08	6.95069e+07	9.7314e+07	466964	715806	15.69	21.82	27.92	19.14	70.56	1.13422e+08	1.47874e+08	1.53479e+08	5.65422e+07	8.7461e+07	6.95069e+07	5.74319e+07	9.7314e+07	9.94168e+07
n/a	High	Master Protein	O43451	Maltase-glucoamylase, intestinal [OS=Homo sapiens]		0	11	21	103	21	1857	209.7	5.5	67.13	metabolic process;transport	membrane	catalytic activity	Pf00088, Pf01055	8972	ENSG00000257335.8	MGAM	7		Metabolic pathways; Starch and sucrose metabolism; Carbohydrate digestion and absorption; Galactose metabolism	Digestion of dietary carbohydrate; Neutrophil degranulation	10	61.847	100	100	100	1.71401e+07	3.47797e+07	1.66075e+07	3.27763e+06	52995.6	15.34	23.32	18.37	9.09	56.29	1.55969e+07	1.71401e+07	2.09301e+07	3.3571e+07	5.0088e+07	3.47797e+07	2.24669e+07	1.66075e+07	1.65327e+07
n/a	High	Master Protein	P06702	Protein S100-A9 [OS=Homo sapiens]		0	75	10	208	10	114	13.2	6.13	121.93	cell communication;cell death;cellular component movement;defense response;metabolic process;regulation of biological process;response to stimulus;transport	cytoplasm;cytoskeleton;cytosol;extracellular;membrane;nucleus;organelle lumen	antioxidant activity;catalytic activity;metal ion binding;protein binding;signal transducer activity	Pf00036, Pf01023, Pf13499, Pf13833	6280	ENSG00000163220.10	S100A9	1	IL1 and megakaryocytes in obesity		Neutrophil degranulation; Metal sequestration by antimicrobial proteins; Regulation of TLR by endogenous ligand	8	13.731	66.742	72.395	100	1.1979e+08	6.94258e+08	1.29935e+08	2.46442e+07	1.79482e+06	17.92	33.34	24.12	19.74	114.09	9.28774e+07	1.33545e+08	1.1979e+08	5.15e+08	1.00069e+09	6.94258e+08	8.44237e+07	1.29935e+08	1.35926e+08
n/a	High	Master Protein	P20700	Lamin-B1 [OS=Homo sapiens]		0	47	29	216	28	586	66.4	5.16	173.76	regulation of biological process;response to stimulus	membrane;nucleus	catalytic activity;motor activity;protein binding;structural molecule activity	Pf00038, Pf00932, Pf01576, Pf07888, Pf09726, Pf09731, Pf10186, Pf12128	4001	ENSG00000113368.11	LMNB1	5	Fas Ligand (FasL) pathway and Stress induction of Heat Shock Proteins (HSP) regulation	Apoptosis	Gene and protein expression by JAK-STAT signaling after Interleukin-12 stimulation; Breakdown of the nuclear lamina; Initiation of Nuclear Envelope Reformation; Clearance of Nuclear Envelope Membranes from Chromatin; Meiotic synapsis; Depolymerisation of the Nuclear Lamina; Formation of Senescence-Associated Heterochromatin Foci (SAHF); Deregulated CDK5 triggers multiple neurodegenerative pathway…	34	100	100	100	100	4.51149e+08	1.19693e+08	3.97766e+08	1.599e+06	13913.9	12.68	30.71	26.08	10.74	143.81	3.71403e+08	4.76621e+08	4.51149e+08	9.32767e+07	1.70505e+08	1.19693e+08	2.48691e+08	3.97766e+08	4.18258e+08
n/a	High	Master Protein	Q12913-1	Receptor-type tyrosine-protein phosphatase eta [OS=Homo sapiens]		0	18	20	81	20	1337	145.9	5.58	49.96	metabolic process;regulation of biological process;response to stimulus;transport	cell surface;membrane	catalytic activity;protein binding	Pf00041, Pf00102, Pf00782, Pf13350, Pf14566	5795	ENSG00000149177.12	PTPRJ	11	VEGFA-VEGFR2 Signaling Pathway	Adherens junction	Negative regulation of MET activity; Neutrophil degranulation; Phosphorylation of CD3 and TCR zeta chains	12	83.599	100	100	100	1.79174e+07	6.99464e+06	2.00174e+07	1.39839e+06	16727.4	17.53	54.75	23.86	19.7	127.63	1.60716e+07	1.79174e+07	2.24817e+07	2.67802e+06	9.6779e+06	6.99464e+06	1.32084e+07	2.12546e+07	2.00174e+07
n/a	High	Master Protein	Q9UQE7	Structural maintenance of chromosomes protein 3 [OS=Homo sapiens]		0	25	32	138	32	1217	141.5	7.18	110.77	cell division;cell organization and biogenesis;metabolic process;regulation of biological process;response to stimulus;transport	chromosome;cytosol;nucleus	catalytic activity;motor activity;nucleotide binding;protein binding;transporter activity	Pf01496, Pf02463, Pf04111, Pf06470, Pf10168, Pf12128, Pf13304, Pf13476, Pf13555	9126	ENSG00000108055.9	SMC3	10	Retinoblastoma (RB) in Cancer; Mecp2 and Associated Rett Syndrome	Oocyte meiosis; Cell cycle	Meiotic synapsis; Separation of Sister Chromatids; Resolution of Sister Chromatid Cohesion; Cohesin Loading onto Chromatin; Establishment of Sister Chromatid Cohesion; SUMOylation of DNA damage response and repair proteins	24	15.949	100	100	100	1.30141e+08	8.86015e+07	1.48363e+08	567773	35599.6	11.36	24.89	16.85	30.54	33.53	1.12706e+08	1.41628e+08	1.30141e+08	8.36696e+07	1.29254e+08	8.86015e+07	1.09232e+08	1.48363e+08	1.49242e+08
n/a	High	Master Protein	P07737	profilin-1 [OS=Homo sapiens]		0	64	8	95	8	140	15	8.27	80.19	cell organization and biogenesis;regulation of biological process;response to stimulus	cytoplasm;cytoskeleton;cytosol;membrane;nucleus	enzyme regulator activity;nucleotide binding;protein binding;RNA binding	Pf00235	5216	ENSG00000108518.7	PFN1	17	Association Between Physico-Chemical Features and Toxicity Associated Pathways; VEGFA-VEGFR2 Signaling Pathway; Regulation of Actin Cytoskeleton; G13 Signaling Pathway	Rap1 signaling pathway; Regulation of actin cytoskeleton; Shigellosis; Salmonella infection	Platelet degranulation ; Signaling by ROBO receptors; RHO GTPases Activate Formins; PCP/CE pathway	22	33.364	100	100	100	4.79742e+07	8.09951e+07	5.78886e+07	1.7739e+06	53167.6	20.04	17.34	21.65	9.14	90.71	3.58985e+07	5.39763e+07	4.79742e+07	7.50398e+07	1.03488e+08	8.09951e+07	4.03936e+07	5.78886e+07	6.23015e+07
n/a	High	Master Protein	Q00839	Heterogeneous nuclear ribonucleoprotein U [OS=Homo sapiens]		0	16	16	143	16	825	90.5	6	94.37	cell differentiation;metabolic process;regulation of biological process;response to stimulus	cell surface;chromosome;cytoplasm;membrane;nucleus;spliceosomal complex	DNA binding;nucleotide binding;protein binding;RNA binding	Pf00622, Pf13671	3192	ENSG00000153187.18	HNRNPU	1	mRNA Processing	Spliceosome	mRNA Splicing - Major Pathway	6	1.747	100	100	100	3.22265e+08	8.13375e+07	3.05179e+08	169631	97079.7	19.55	29.79	30.76	70.82	130.8	2.27249e+08	3.30352e+08	3.22265e+08	6.31954e+07	1.1383e+08	8.13375e+07	1.8317e+08	3.05179e+08	3.48736e+08
n/a	High	Master Protein	P23396-1	40S ribosomal protein S3 [OS=Homo sapiens]		0	72	20	182	20	243	26.7	9.66	125.94	cell death;cell division;cell organization and biogenesis;metabolic process;regulation of biological process;response to stimulus;transport	cytoplasm;cytoskeleton;cytosol;endoplasmic reticulum;membrane;mitochondrion;nucleus;organelle lumen;ribosome	catalytic activity;DNA binding;protein binding;RNA binding;structural molecule activity	Pf00189, Pf07650	6188	ENSG00000149273.14	RPS3	11	Cytoplasmic Ribosomal Proteins	Ribosome	Peptide chain elongation; Eukaryotic Translation Termination; Viral mRNA Translation; Formation of the ternary complex, and subsequently, the 43S complex; L13a-mediated translational silencing of Ceruloplasmin expression; Selenocysteine synthesis; Nonsense Mediated Decay (NMD) independent of the Exon Junction Complex (EJC); Nonsense Mediated Decay (NMD) enhanced by the Exon Junction Complex (EJC)…	38	2.266	100	100	100	3.16427e+08	2.11758e+08	3.71604e+08	473545	208976	13.82	18.97	21.6	17.63	139	3.16427e+08	2.8643e+08	3.75008e+08	2.11758e+08	1.67339e+08	2.46212e+08	2.67144e+08	4.14673e+08	3.71604e+08
n/a	High	Master Protein	Q6UVK1	Chondroitin sulfate proteoglycan 4 [OS=Homo sapiens]		0	7	22	217	22	2322	250.4	5.47	93.06	cell differentiation;cell proliferation;cellular component movement;development;metabolic process;regulation of biological process;response to stimulus	cell surface;extracellular;membrane;organelle lumen	protein binding;signal transducer activity	Pf00054, Pf02210	1464	ENSG00000173546.7	CSPG4	15	Spinal Cord Injury		A tetrasaccharide linker sequence is required for GAG synthesis; Dermatan sulfate biosynthesis; Defective CHSY1 causes TPBS; Defective B4GALT7 causes EDS, progeroid type; Defective B3GALT6 causes EDSP2 and SEMDJL1; CS/DS degradation; Defective CHST14 causes EDS, musculocontractural type; Defective CHST3 causes SEDCJD; Chondroitin sulfate biosynthesis; Defective B3GAT3 causes JDSSDHD	19	2.606	100	100	100	8.2453e+08	8.08883e+07	6.27228e+08	581353	223070	17.21	22.9	23.79	6.24	44.9	6.39176e+08	9.03832e+08	8.2453e+08	7.06222e+07	1.09029e+08	8.08883e+07	4.03552e+08	6.27228e+08	6.37862e+08
n/a	High	Master Protein	Q92896	Golgi apparatus protein 1 [OS=Homo sapiens]		0	13	17	151	17	1179	134.5	6.9	152.63	cellular component movement;regulation of biological process	Golgi;membrane	protein binding	Pf00839	2734	ENSG00000090863.11	GLG1	16		Cell adhesion molecules (CAMs)	Cell surface interactions at the vascular wall	3	30.802	100	100	100	1.33735e+08	2.77773e+07	1.51028e+08	134547	4368.1	9.6	15.93	24.91	35.23	156.64	1.33735e+08	1.32654e+08	1.56618e+08	2.70909e+07	3.5746e+07	2.77773e+07	9.69615e+07	1.51028e+08	1.59142e+08
n/a	High	Master Protein	P62241	40S ribosomal protein S8 [OS=Homo sapiens]		0	67	16	187	16	208	24.2	10.32	152.88	cell organization and biogenesis;metabolic process;transport	cytoplasm;cytosol;endoplasmic reticulum;membrane;nucleus;ribosome	protein binding;RNA binding;structural molecule activity	Pf01201	6202	ENSG00000142937.11	RPS8	1	Cytoplasmic Ribosomal Proteins	Ribosome	Peptide chain elongation; Eukaryotic Translation Termination; Viral mRNA Translation; Formation of the ternary complex, and subsequently, the 43S complex; L13a-mediated translational silencing of Ceruloplasmin expression; Selenocysteine synthesis; Nonsense Mediated Decay (NMD) independent of the Exon Junction Complex (EJC); Nonsense Mediated Decay (NMD) enhanced by the Exon Junction Complex (EJC)…	38	0.242	100	100	100	4.10208e+08	5.3286e+07	4.03777e+08	25025.1	103402	15.79	22.31	22.07	70.38	75.94	3.07785e+08	4.10208e+08	4.11281e+08	4.76971e+07	7.22778e+07	5.3286e+07	2.81219e+08	4.03777e+08	4.38561e+08
n/a	High	Master Protein	P04899-1	guanine nucleotide-binding protein G(i) subunit alpha-2 [OS=Homo sapiens]		0	52	17	192	13	355	40.4	5.54	158.7	cell division;cell proliferation;metabolic process;regulation of biological process;response to stimulus	cytoplasm;cytoskeleton;cytosol;membrane;nucleus	catalytic activity;metal ion binding;nucleotide binding;protein binding;signal transducer activity	Pf00025, Pf00503	2771	ENSG00000114353.16	GNAI2	3	Human Thyroid Stimulating Hormone (TSH) signaling pathway; Corticotropin-releasing hormone signaling pathway; Signal Transduction of S1P Receptor; G Protein Signaling Pathways; Chemokine signaling pathway; Calcium Regulation in the Cardiac Cell	cGMP-PKG signaling pathway; Leukocyte transendothelial migration; Dopaminergic synapse; Toxoplasmosis; Cholinergic synapse; Pathways in cancer; Axon guidance; Rap1 signaling pathway; Sphingolipid signaling pathway; Tight junction; Long-term depression; Adrenergic signaling in cardiomyocytes; Estrogen signaling pathway; Circadian entrainment; Alcoholism; Chagas disease (American trypanosomiasis); …	G alpha (z) signalling events; Cooperation of PDCL (PhLP1) and TRiC/CCT in G-protein beta folding; G alpha (s) signalling events; PLC beta mediated events; ADP signalling through P2Y purinoceptor 12; Adrenaline,noradrenaline inhibits insulin secretion; Adenylate cyclase inhibitory pathway; G-protein activation	70	100	100	100	100	1.26669e+08	1.19539e+08	1.5835e+08	4.99752e+06	34225.3	14.69	21.73	23.66	14.59	95.2	1.18844e+08	1.26669e+08	1.56138e+08	8.24801e+07	1.26942e+08	1.19539e+08	1.03197e+08	1.63857e+08	1.5835e+08
n/a	High	Master Protein	P13591-1	Isoform 2 of Neural cell adhesion molecule 1 [OS=Homo sapiens]		0	17	17	135	17	848	93.3	4.87	138.6	cellular component movement;metabolic process;regulation of biological process;response to stimulus	cell surface;cytosol;membrane	protein binding;receptor activity	Pf00041, Pf00047, Pf07654, Pf07679, Pf08205, Pf13895, Pf13927	4684	ENSG00000149294.16	NCAM1	11	Brain-Derived Neurotrophic Factor (BDNF) signaling pathway; Cardiac Progenitor Differentiation			2	19.166	100	100	100	1.32425e+09	1.85946e+08	9.07695e+08	3.75498e+06	195916	15.84	25.97	25.01	38.06	34.16	1.0387e+09	1.424e+09	1.32425e+09	1.60737e+08	2.61946e+08	1.85946e+08	5.96009e+08	9.07695e+08	9.90319e+08
n/a	High	Master Protein	P18669	Phosphoglycerate mutase 1 [OS=Homo sapiens]		0	39	10	124	10	254	28.8	7.18	98.89	metabolic process;regulation of biological process;transport	cytoplasm;cytosol;extracellular;membrane;organelle lumen	catalytic activity;protein binding	Pf00300	5223; 643576	ENSG00000171314.8	PGAM1; LOC643576	10; 12	Cori Cycle; Glycolysis and Gluconeogenesis	Glycolysis / Gluconeogenesis; Carbon metabolism; Metabolic pathways; Glucagon signaling pathway; Central carbon metabolism in cancer; Biosynthesis of amino acids; Glycine, serine and threonine metabolism	Gluconeogenesis; Glycolysis; Neutrophil degranulation	17	1.09	100	100	100	2.16843e+08	6.37685e+07	1.37985e+08	610534	560271	17.52	34.46	22.2	3.39	64.58	1.70741e+08	2.43613e+08	2.16843e+08	4.25568e+07	8.69465e+07	6.37685e+07	9.49113e+07	1.37985e+08	1.47913e+08
n/a	High	Master Protein	P04083	annexin A1 [OS=Homo sapiens]		0	49	18	135	18	346	38.7	7.02	96.78	cell differentiation;cell organization and biogenesis;cellular component movement;defense response;metabolic process;regulation of biological process;response to stimulus;transport	cell surface;cytoplasm;cytoskeleton;cytosol;endosome;extracellular;membrane;nucleus;vacuole	catalytic activity;DNA binding;enzyme regulator activity;metal ion binding;protein binding;RNA binding;structural molecule activity	Pf00191	301	ENSG00000135046.13	ANXA1	9	Integrated Breast Cancer Pathway; Spinal Cord Injury; VEGFA-VEGFR2 Signaling Pathway; Prostaglandin Synthesis and Regulation		Gastrin-CREB signalling pathway via PKC and MAPK; G alpha (i) signalling events; Smooth Muscle Contraction; Interleukin-4 and 13 signaling; Formyl peptide receptors bind formyl peptides and many other ligands	20	3.598	53.736	65.782	48.908	9.69916e+07	8.82771e+07	1.18733e+08	6.49357e+06	1.80495e+06	14.33	28.45	23.3	2.57	72.85	8.08375e+07	9.69916e+07	1.07989e+08	6.45835e+07	1.15435e+08	8.82771e+07	7.69027e+07	1.18733e+08	1.19963e+08
n/a	High	Master Protein	P05556-1	Integrin beta-1 [OS=Homo sapiens]		0	17	16	174	16	798	88.4	5.39	179.97	cell differentiation;cell growth;cell organization and biogenesis;cellular component movement;defense response;metabolic process;regulation of biological process;response to stimulus;transport	cell surface;cytoplasm;endosome;membrane	enzyme regulator activity;metal ion binding;protein binding;receptor activity;signal transducer activity	Pf00362, Pf07965, Pf08725	3688	ENSG00000150093.18	ITGB1	10	Integrin-mediated Cell Adhesion; Prolactin Signaling Pathway; Neural Crest Differentiation; Arrhythmogenic Right Ventricular Cardiomyopathy; Pathogenic Escherichia coli infection; Primary Focal Segmental Glomerulosclerosis FSGS; Focal Adhesion; Signaling of Hepatocyte Growth Factor Receptor; Rac1/Pak1/p38/MMP-2 pathway; TGF-beta Signaling Pathway; Factors and pathways affecting insulin-like growt…	Pertussis; Dilated cardiomyopathy; PI3K-Akt signaling pathway; Bacterial invasion of epithelial cells; Phagosome; Cell adhesion molecules (CAMs); Shigellosis; Arrhythmogenic right ventricular cardiomyopathy (ARVC); ECM-receptor interaction; Regulation of actin cytoskeleton; Leishmaniasis; Hypertrophic cardiomyopathy (HCM); Focal adhesion; Pathogenic Escherichia coli infection; Axon guidance; Toxo…	Integrin cell surface interactions; Signal transduction by L1; Basigin interactions; MET activates PTK2 signaling; Molecules associated with elastic fibres; Platelet Adhesion to exposed collagen; Syndecan interactions; CHL1 interactions; ECM proteoglycans; Laminin interactions; Localization of the PINCH-ILK-PARVIN complex to focal adhesions; Immunoregulatory interactions between a Lymphoid and a …	74	7.5	100	100	100	4.17605e+08	2.63818e+07	2.93673e+08	389870	51981.6	12.91	18.34	21.59	35.09	74.49	3.55748e+08	4.17605e+08	4.61564e+08	2.18442e+07	3.15936e+07	2.63818e+07	1.97896e+08	2.93673e+08	2.98967e+08
n/a	High	Master Protein	Q14683	structural maintenance of chromosomes protein 1a [OS=Homo sapiens]		0	24	30	201	30	1233	143.1	7.64	148.6	cell division;cell organization and biogenesis;metabolic process;regulation of biological process;response to stimulus	chromosome;cytosol;nucleus	nucleotide binding;protein binding;RNA binding	Pf02463, Pf05262, Pf05557, Pf06470, Pf09726, Pf09731, Pf10186, Pf12128, Pf13175, Pf13304, Pf13476, Pf13555, Pf13558	8243	ENSG00000072501.17	SMC1A	X	miRNA Regulation of DNA Damage Response; Cell Cycle; Retinoblastoma (RB) in Cancer; Constitutive Androstane Receptor Pathway; Pathways Affected in Adenoid Cystic Carcinoma; ATM Signaling Network in Development and Disease; mRNA Processing; DNA Damage Response	Oocyte meiosis; Cell cycle	Meiotic synapsis; Separation of Sister Chromatids; Resolution of Sister Chromatid Cohesion; Cohesin Loading onto Chromatin; Establishment of Sister Chromatid Cohesion; SUMOylation of DNA damage response and repair proteins	30	0.682	100	100	100	1.78998e+08	6.92873e+07	1.99481e+08	100212	146904	13.64	27.16	25.08	50.15	22.19	1.50136e+08	1.97698e+08	1.78998e+08	6.92873e+07	1.02248e+08	6.26621e+07	1.64047e+08	1.99481e+08	2.67868e+08
n/a	High	Master Protein	P26641	elongation factor 1-gamma [OS=Homo sapiens]		0	41	17	175	17	437	50.1	6.67	111.18	metabolic process;response to stimulus	cytoplasm;cytosol;endoplasmic reticulum;membrane;nucleus	catalytic activity;protein binding;RNA binding	Pf00043, Pf00647, Pf02798, Pf13409, Pf13410, Pf13417, Pf14497	1937	ENSG00000254772.9	EEF1G	11	Translation Factors	Legionellosis	Eukaryotic Translation Elongation	5	1.253	100	100	100	4.61354e+08	2.09311e+08	3.39081e+08	168123	134153	22.57	25.61	29.62	30.98	102.29	3.02641e+08	4.61354e+08	4.63929e+08	1.7607e+08	2.8799e+08	2.09311e+08	2.05095e+08	3.39081e+08	3.7917e+08
n/a	High	Master Protein	P29401	Transketolase [OS=Homo sapiens]		0	33	20	141	20	623	67.8	7.66	79.67	metabolic process;regulation of biological process	cytosol	catalytic activity;metal ion binding;protein binding	Pf00456, Pf00676, Pf02775, Pf02779, Pf02780, Pf09364	7086	ENSG00000163931.15	TKT	3	Pentose Phosphate Pathway	Pentose phosphate pathway; Biosynthesis of amino acids; Metabolic pathways; Carbon metabolism	Insulin effects increased synthesis of Xylulose-5-Phosphate; Pentose phosphate pathway (hexose monophosphate shunt)	10	47.168	100	100	100	3.5997e+08	1.94833e+08	3.15858e+08	4.87256e+06	103303	12.61	21.48	21.07	18.47	21.21	3.30529e+08	3.5997e+08	4.22141e+08	1.64768e+08	2.50887e+08	1.94833e+08	2.19351e+08	3.15858e+08	3.31931e+08
n/a	High	Master Protein	P62633-1	Cellular nucleic acid-binding protein [OS=Homo sapiens]		0	45	7	73	1	177	19.5	7.71	79.81	metabolic process;regulation of biological process	cytoplasm;cytosol;endoplasmic reticulum;nucleus	DNA binding;metal ion binding;protein binding;RNA binding	Pf00098	7555	ENSG00000169714.16	CNBP	3				0	2.718	100	100	100	1.42045e+08	1.96127e+07	1.72306e+08	41423.5	15243	10.59	25.05	15.17	31.55	20.72	1.34622e+08	1.64524e+08	1.42045e+08	1.71734e+07	2.74389e+07	1.96127e+07	1.35322e+08	1.72306e+08	1.82377e+08
n/a	High	Master Protein	P39023	60S ribosomal protein L3 [OS=Homo sapiens]		0	40	19	139	19	403	46.1	10.18	89.21	cell organization and biogenesis;metabolic process;response to stimulus;transport	cytoplasm;cytosol;nucleus;ribosome	protein binding;RNA binding;structural molecule activity	Pf00297	6122	ENSG00000100316.15	RPL3	22	Cytoplasmic Ribosomal Proteins	Ribosome	Peptide chain elongation; Eukaryotic Translation Termination; Viral mRNA Translation; L13a-mediated translational silencing of Ceruloplasmin expression; Nonsense Mediated Decay (NMD) independent of the Exon Junction Complex (EJC); Selenocysteine synthesis; Nonsense Mediated Decay (NMD) enhanced by the Exon Junction Complex (EJC); GTP hydrolysis and joining of the 60S ribosomal subunit; Major path…	34	2.512	100	100	100	5.12201e+08	1.59257e+08	5.04666e+08	953588	379594	9.92	15.61	21.65	5.84	83.3	4.3191e+08	5.12201e+08	5.18794e+08	1.33456e+08	1.82951e+08	1.59257e+08	3.37484e+08	5.07724e+08	5.04666e+08
n/a	High	Master Protein	P26038	Moesin [OS=Homo sapiens]		0	36	30	232	23	577	67.8	6.4	146.88	cell differentiation;cell organization and biogenesis;cell proliferation;cellular component movement;regulation of biological process;response to stimulus	cell surface;cytoplasm;cytoskeleton;cytosol;membrane;nucleus	protein binding;RNA binding;structural molecule activity	Pf00373, Pf00769, Pf09379, Pf09380	4478	ENSG00000147065.16	MSN	X	Glial Cell Differentiation; AGE/RAGE pathway; Regulation of Actin Cytoskeleton	Leukocyte transendothelial migration; Measles; Proteoglycans in cancer; Regulation of actin cytoskeleton	Gene and protein expression by JAK-STAT signaling after Interleukin-12 stimulation; Interleukin-12 family signaling; Recycling pathway of L1	16	29.264	100	100	100	2.06353e+08	1.09581e+08	2.24984e+08	2.84223e+06	97124.8	10.33	25.04	21.88	20.73	72.92	2.00026e+08	2.06353e+08	2.41428e+08	8.81837e+07	1.4482e+08	1.09581e+08	1.53606e+08	2.24984e+08	2.36356e+08
n/a	High	Master Protein	P12429	annexin A3 [OS=Homo sapiens]		0	56	19	121	19	323	36.4	5.92	68.85	defense response;regulation of biological process;response to stimulus;transport	cytoplasm;cytosol;membrane	enzyme regulator activity;metal ion binding;protein binding	Pf00191	306	ENSG00000138772.12	ANXA3	4	Prostaglandin Synthesis and Regulation			1	16.427	100	100	100	3.52347e+07	3.33613e+07	3.28755e+07	4.65998e+06	283674	47.55	20.24	30.1	29.72	56.87	3.84206e+07	1.31551e+07	3.52347e+07	2.94082e+07	4.32946e+07	3.33613e+07	3.28755e+07	4.37563e+07	2.36552e+07
n/a	High	Master Protein	Q06830	peroxiredoxin-1 [OS=Homo sapiens]		0	57	14	178	12	199	22.1	8.13	118.63	cell proliferation;cellular homeostasis;defense response;metabolic process;regulation of biological process;response to stimulus	cytoplasm;cytosol;mitochondrion;nucleus	antioxidant activity;catalytic activity;protein binding;RNA binding	Pf00578, Pf08534, Pf10417	5052	ENSG00000117450.13	PRDX1	1	Androgen receptor signaling pathway; Selenium Micronutrient Network; NRF2 pathway	Peroxisome	TP53 Regulates Metabolic Genes; Deregulated CDK5 triggers multiple neurodegenerative pathways in Alzheimer's disease models; Detoxification of Reactive Oxygen Species	15	3.847	100	100	100	5.44643e+08	2.40799e+08	5.88637e+08	1.61501e+06	419795	20.69	34.56	26.94	10.23	68.34	3.75999e+08	5.44643e+08	5.60148e+08	1.60688e+08	3.28917e+08	2.40799e+08	3.61897e+08	6.20703e+08	5.88637e+08
n/a	High	Master Protein	P61313-1	60S ribosomal protein L15 [OS=Homo sapiens]		0	40	13	199	13	204	24.1	11.62	125.84	cell organization and biogenesis;metabolic process;response to stimulus;transport	cytosol;membrane;nucleus;ribosome	protein binding;RNA binding;structural molecule activity	Pf00827	6138	ENSG00000174748.18	RPL15	3	Cytoplasmic Ribosomal Proteins	Ribosome	Peptide chain elongation; Eukaryotic Translation Termination; Viral mRNA Translation; L13a-mediated translational silencing of Ceruloplasmin expression; Nonsense Mediated Decay (NMD) independent of the Exon Junction Complex (EJC); Selenocysteine synthesis; Nonsense Mediated Decay (NMD) enhanced by the Exon Junction Complex (EJC); GTP hydrolysis and joining of the 60S ribosomal subunit; Major path…	34	1.024	100	100	100	5.39345e+08	1.51673e+08	4.7353e+08	62733.2	61281.8	3.68	14.65	21.91	51.33	128.59	5.39345e+08	5.06239e+08	5.4043e+08	1.37626e+08	1.82673e+08	1.51673e+08	3.15071e+08	4.76647e+08	4.7353e+08
n/a	High	Master Protein	Q13740-2	Isoform 2 of CD166 antigen [OS=Homo sapiens]		0	27	13	102	13	570	63.6	7.3	95.16	cell growth;cellular component movement;regulation of biological process;response to stimulus		protein binding	Pf07679, Pf08205, Pf13895, Pf13927	214	ENSG00000170017.12	ALCAM	3				0	16.489	100	100	100	2.03348e+08	5.68625e+07	2.39683e+08	129547	7856.42	12.61	21.71	26.23	30.33	113.14	1.66909e+08	2.03348e+08	2.13592e+08	5.01662e+07	7.56645e+07	5.68625e+07	1.51332e+08	2.39683e+08	2.56967e+08
n/a	High	Master Protein	P05109	Protein S100-A8 [OS=Homo sapiens]		0	76	12	203	12	93	10.8	7.03	127.8	cell death;cellular component movement;defense response;metabolic process;regulation of biological process;response to stimulus;transport	cytoplasm;cytoskeleton;cytosol;extracellular;membrane;nucleus;organelle lumen	metal ion binding;protein binding	Pf01023, Pf13499	6279	ENSG00000143546.9	S100A8	1			Neutrophil degranulation; Metal sequestration by antimicrobial proteins; Regulation of TLR by endogenous ligand	7	23.873	100	100	100	1.47218e+08	4.37368e+08	1.30862e+08	3.04527e+07	1.27563e+06	19.89	35.63	26.46	4.43	103.18	1.0318e+08	1.51085e+08	1.47218e+08	2.91099e+08	6.08269e+08	4.37368e+08	8.32853e+07	1.30862e+08	1.42787e+08
n/a	High	Master Protein	P15880	40S ribosomal protein S2 [OS=Homo sapiens]		0	55	18	154	18	293	31.3	10.24	61.14	cell organization and biogenesis;metabolic process;regulation of biological process;transport	cytosol;membrane;nucleus;ribosome	protein binding;RNA binding;structural molecule activity	Pf00333, Pf03719	6187	ENSG00000140988.15	RPS2	16	Cytoplasmic Ribosomal Proteins	Ribosome	Peptide chain elongation; Protein methylation; Eukaryotic Translation Termination; Viral mRNA Translation; RMTs methylate histone arginines; Formation of the ternary complex, and subsequently, the 43S complex; L13a-mediated translational silencing of Ceruloplasmin expression; Selenocysteine synthesis; Nonsense Mediated Decay (NMD) independent of the Exon Junction Complex (EJC); Nonsense Mediated …	44	0.563	100	100	100	4.6408e+08	1.96908e+08	4.79758e+08	178853	317708	15.05	28.75	25.31	19.59	100.49	3.69556e+08	4.6408e+08	4.9872e+08	1.55778e+08	2.74112e+08	1.96908e+08	2.98506e+08	4.86704e+08	4.79758e+08
n/a	High	Master Protein	Q9UQ80	proliferation-associated protein 2G4 [OS=Homo sapiens]		0	34	13	100	13	394	43.8	6.55	68.7	cell proliferation;metabolic process;regulation of biological process;transport	cytoplasm;extracellular;membrane;nucleus;organelle lumen	DNA binding;protein binding;RNA binding	Pf00557	5036	ENSG00000170515.13	PA2G4	12			Neutrophil degranulation	3	0.908	100	100	100	9.33207e+07	3.58996e+07	9.58141e+07	27982.2	30834.3	36.81	29.29	25.86	33.66	120.55	6.73816e+07	1.4022e+08	9.33207e+07	2.66e+07	4.81391e+07	3.58996e+07	6.00593e+07	9.58141e+07	1.00402e+08
n/a	High	Master Protein	P05141	ADP/ATP translocase 2 [OS=Homo sapiens]		0	48	17	158	10	298	32.8	9.69	78.93	regulation of biological process;transport	membrane;mitochondrion;nucleus	protein binding;RNA binding;transporter activity	Pf00153	292	ENSG00000005022.5	SLC25A5	X	Electron Transport Chain	Calcium signaling pathway; HTLV-I infection; cGMP-PKG signaling pathway; Parkinson's disease; Huntington's disease	Vpr-mediated induction of apoptosis by mitochondrial outer membrane permeabilization; Regulation of insulin secretion	15	2.541	100	100	100	1.08912e+09	3.27314e+08	1.34121e+09	258420	101706	16.71	29.93	30.86	32.45	100.77	8.41945e+08	1.17516e+09	1.08912e+09	2.71243e+08	4.79078e+08	3.27314e+08	7.64048e+08	1.34121e+09	1.43857e+09
n/a	High	Master Protein	P60660	Myosin light polypeptide 6 [OS=Homo sapiens]		0	62	8	185	8	151	16.9	4.65	115.47	cellular component movement	cytosol;membrane	catalytic activity;metal ion binding;motor activity;protein binding;structural molecule activity	Pf00036, Pf13405, Pf13499	4637	ENSG00000092841.18	MYL6	12	Focal Adhesion	Oxytocin signaling pathway; Vascular smooth muscle contraction	RHO GTPases activate PAKs; EPHA-mediated growth cone collapse; RHO GTPases Activate ROCKs; Sema4D induced cell migration and growth-cone collapse; Smooth Muscle Contraction; RHO GTPases activate CIT; RHO GTPases activate PKNs	19	11.625	100	100	100	4.0376e+08	1.20422e+08	2.58669e+08	4.55638e+06	391937	20.95	31.94	30.55	3.5	47.34	2.74707e+08	4.08496e+08	4.0376e+08	9.41689e+07	1.75542e+08	1.20422e+08	1.49973e+08	2.58669e+08	2.81532e+08
n/a	High	Master Protein	P18206-2	Isoform 1 of Vinculin [OS=Homo sapiens]		0	22	23	170	23	1066	116.6	6.09	122.41	cell growth;cell organization and biogenesis;cellular component movement;regulation of biological process;transport	cytoskeleton;cytosol;extracellular;membrane;organelle lumen	protein binding;structural molecule activity	Pf01044	7414	ENSG00000035403.17	VCL	10	Integrin-mediated Cell Adhesion; Primary Focal Segmental Glomerulosclerosis FSGS; Focal Adhesion; VEGFA-VEGFR2 Signaling Pathway; Regulation of Actin Cytoskeleton			5	34.494	100	100	100	1.4857e+08	4.75892e+07	1.14723e+08	1.0741e+06	31138.6	16.8	2.41	20.18	26.57	114.42	1.2623e+08	1.76697e+08	1.4857e+08	4.56549e+07	4.75892e+07	4.76461e+07	7.9729e+07	1.17225e+08	1.14723e+08
n/a	High	Master Protein	Q92614-1	Unconventional myosin-XVIIIa [OS=Homo sapiens]		0	10	20	108	20	2054	233	6.3	81.02	cell differentiation;cell organization and biogenesis;cellular component movement;metabolic process;regulation of biological process;transport	cell surface;cytoplasm;cytoskeleton;Golgi;membrane	catalytic activity;DNA binding;motor activity;nucleotide binding;protein binding;RNA binding;structural molecule activity;transporter activity	Pf00038, Pf00063, Pf00595, Pf00769, Pf01496, Pf01576, Pf02463, Pf02841, Pf03962, Pf04111, Pf04156, Pf04502, Pf04615, Pf05483, Pf05557, Pf05622, Pf05701, Pf05911, Pf06008, Pf06160, Pf06785, Pf06818, Pf07111, Pf07888, Pf08286, Pf09726, Pf09728, Pf09731, Pf09789, Pf10174, Pf12128, Pf12252, Pf12718, Pf13514, Pf13851, Pf14643, Pf14662, Pf14992, Pf15066, Pf15070, Pf15397	399687	ENSG00000196535.15	MYO18A	17			Signaling by cytosolic FGFR1 fusion mutants	6	1.244	100	100	100	8.20844e+07	4.0572e+07	1.00946e+08	34232.7	27525.2	26.05	24.55	23.94	65.29	44.33	6.04855e+07	1.03157e+08	8.20844e+07	2.95291e+07	4.89504e+07	4.0572e+07	6.67879e+07	1.00946e+08	1.07867e+08
n/a	High	Master Protein	P46459	Vesicle-fusing ATPase [OS=Homo sapiens]		0	23	18	171	18	744	82.5	6.95	106.73	cell organization and biogenesis;metabolic process;regulation of biological process;response to stimulus;transport	cytoplasm;cytosol;membrane	catalytic activity;metal ion binding;nucleotide binding;protein binding;RNA binding	Pf00004, Pf00910, Pf01078, Pf02359, Pf02933, Pf05272, Pf05496, Pf06068, Pf07724, Pf07728, Pf13173, Pf13191, Pf13207, Pf13401	4905	ENSG00000073969.18; ENSG00000278174.3; ENSG00000276262.2	NSF	17; CHR_HSCHR17_1_CTG5; CHR_HSCHR17_2_CTG5	Synaptic Vesicle Pathway; Brain-Derived Neurotrophic Factor (BDNF) signaling pathway	Synaptic vesicle cycle; Vasopressin-regulated water reabsorption; GABAergic synapse	COPI-dependent Golgi-to-ER retrograde traffic; Intra-Golgi traffic; COPII (Coat Protein 2) Mediated Vesicle Transport; COPI-mediated anterograde transport; Retrograde transport at the Trans-Golgi-Network; Trafficking of GluR2-containing AMPA receptors	25	2.283	100	100	100	2.62764e+08	6.74857e+07	2.0034e+08	248142	108711	13.9	19.06	26.91	9.32	6.31	2.04866e+08	2.62764e+08	2.64393e+08	5.46254e+07	8.03517e+07	6.74857e+07	1.28009e+08	2.0034e+08	2.22506e+08
n/a	High	Master Protein	P50991	T-complex protein 1 subunit delta [OS=Homo sapiens]		0	32	16	128	16	539	57.9	7.83	95.31	metabolic process;regulation of biological process;transport	cytoplasm;cytoskeleton;cytosol	nucleotide binding;protein binding;RNA binding	Pf00118	10575	ENSG00000115484.14	CCT4	2			BBSome-mediated cargo-targeting to cilium; Prefoldin mediated transfer of substrate to CCT/TriC; Cooperation of PDCL (PhLP1) and TRiC/CCT in G-protein beta folding; Association of TriC/CCT with target proteins during biosynthesis; Formation of tubulin folding intermediates by CCT/TriC; Folding of actin by CCT/TriC	13	8.097	100	100	100	3.47188e+08	9.5403e+07	1.8146e+08	1.05849e+06	130730	18.37	30.66	25.28	15.51	89.46	2.6665e+08	3.8697e+08	3.47188e+08	7.70235e+07	1.38996e+08	9.5403e+07	1.14206e+08	1.8146e+08	1.876e+08
n/a	High	Master Protein	Q01518-1	adenylyl cyclase-associated protein 1 [OS=Homo sapiens]		0	45	20	193	20	475	51.9	8.06	110.32	cell organization and biogenesis;cellular component movement;regulation of biological process;response to stimulus;transport	cytoplasm;cytoskeleton;extracellular;membrane;organelle lumen	protein binding	Pf01213, Pf07986, Pf08603	10487	ENSG00000131236.16	CAP1	1	Angiopoietin Like Protein 8 Regulatory Pathway; Insulin Signaling		Platelet degranulation ; Neutrophil degranulation; Role of ABL in ROBO-SLIT signaling	13	19.858	100	100	100	1.4914e+08	1.27008e+08	1.30747e+08	5.43898e+06	273894	6.73	11.05	26.58	29.78	114.8	1.32941e+08	1.4914e+08	1.50294e+08	1.10432e+08	1.37873e+08	1.27008e+08	8.47602e+07	1.30747e+08	1.46479e+08
n/a	High	Master Protein	P52597	Heterogeneous nuclear ribonucleoprotein F [OS=Homo sapiens]		0	43	12	92	11	415	45.6	5.58	117.85	metabolic process;regulation of biological process;response to stimulus	cytosol;membrane;nucleus;spliceosomal complex	protein binding;RNA binding	Pf00076, Pf08080, Pf14259	3185	ENSG00000169813.16	HNRNPF	10	Mecp2 and Associated Rett Syndrome		Gene and protein expression by JAK-STAT signaling after Interleukin-12 stimulation; mRNA Splicing - Major Pathway; FGFR2 alternative splicing; Interleukin-12 family signaling	15	4.32	100	100	100	2.88779e+08	7.76635e+07	3.3848e+08	501664	116137	17.61	30.62	25.84	19.55	23.75	2.25115e+08	3.21585e+08	2.88779e+08	6.0318e+07	1.10216e+08	7.76635e+07	2.09244e+08	3.3848e+08	3.46467e+08
n/a	High	Master Protein	P27105	erythrocyte band 7 integral membrane protein [OS=Homo sapiens]		0	52	13	86	13	288	31.7	7.88	91.35	cell organization and biogenesis;regulation of biological process;transport	cytoplasm;cytoskeleton;cytosol;endoplasmic reticulum;membrane;mitochondrion	protein binding	Pf01145	2040	ENSG00000148175.12	STOM	9			Neutrophil degranulation; Stimuli-sensing channels	6	100	100	100	100	3.82292e+07	5.24337e+07	3.10705e+07	5.90181e+06	8154.08	14.62	12.78	25.61	16.81	119.81	3.04409e+07	4.06294e+07	3.82292e+07	4.4709e+07	5.24337e+07	5.7847e+07	2.03942e+07	3.10705e+07	3.44396e+07
n/a	High	Master Protein	Q16891-4	Isoform 4 of MICOS complex subunit MIC60 [OS=Homo sapiens]		0	22	16	108	16	757	83.5	6.57	49.35	cell organization and biogenesis;cellular homeostasis	membrane;mitochondrion	protein binding;RNA binding	Pf09731	10989	ENSG00000132305.20	IMMT	2				0	3.979	100	100	100	2.22164e+08	8.53398e+07	3.10424e+08	277630	69769.7	20.29	40.99	33.8	17.9	80.13	1.80834e+08	2.71996e+08	2.22164e+08	7.94037e+07	1.58768e+08	8.53398e+07	1.6159e+08	3.10424e+08	3.21972e+08
n/a	High	Master Protein	P11498	pyruvate carboxylase, mitochondrial [OS=Homo sapiens]		0	17	19	118	19	1178	129.6	6.84	102.85	metabolic process;regulation of biological process	cytoplasm;cytosol;mitochondrion;organelle lumen	catalytic activity;metal ion binding;nucleotide binding;protein binding	Pf00289, Pf00364, Pf00682, Pf02222, Pf02436, Pf02785, Pf02786, Pf07478, Pf08443, Pf13533, Pf13535, Pf15632	5091	ENSG00000173599.13	PC	11	Alanine and aspartate metabolism; TCA Cycle and Deficiency of Pyruvate Dehydrogenase complex (PDHc); Fatty Acid Biosynthesis; Amino Acid metabolism; Glycolysis and Gluconeogenesis	Carbon metabolism; Biosynthesis of amino acids; Citrate cycle (TCA cycle); Metabolic pathways; Pyruvate metabolism	Gluconeogenesis; Biotin transport and metabolism; Defective HLCS causes multiple carboxylase deficiency	22	2.335	100	100	100	6.01095e+07	2.19713e+07	7.87044e+07	22396.5	9591.35	6.87	16.44	27.53	33.2	140.48	6.01095e+07	5.89398e+07	6.6829e+07	2.19713e+07	2.782e+07	2.05448e+07	4.83708e+07	7.87044e+07	8.45398e+07
n/a	High	Master Protein	P67809	Nuclease-sensitive element-binding protein 1 [OS=Homo sapiens]		0	33	8	66	8	324	35.9	9.88	141.68	metabolic process;regulation of biological process	cytoplasm;cytosol;extracellular;membrane;nucleus;spliceosomal complex	DNA binding;protein binding;RNA binding	Pf00313	4904	ENSG00000065978.18	YBX1	1	Brain-Derived Neurotrophic Factor (BDNF) signaling pathway; Mecp2 and Associated Rett Syndrome; mRNA Processing; Sudden Infant Death Syndrome (SIDS) Susceptibility Pathways		mRNA Splicing - Major Pathway; mRNA Splicing - Minor Pathway	9	0.01	100	100	100	1.54114e+07	4.92324e+06	2.49658e+07		10579.9	12.78	38.83	12.56		93.49	1.54114e+07	1.43806e+07	1.83333e+07	2.54166e+06	5.90848e+06	4.92324e+06	2.23216e+07	2.49658e+07	2.865e+07
n/a	High	Master Protein	P33176	Kinesin-1 heavy chain [OS=Homo sapiens]		0	17	14	92	14	963	109.6	6.51	97.84	cell differentiation;cell organization and biogenesis;cellular component movement;metabolic process;regulation of biological process;transport	cytoplasm;cytoskeleton;cytosol;membrane	catalytic activity;motor activity;nucleotide binding;protein binding	Pf00225, Pf01576, Pf02463, Pf03999, Pf04111, Pf04156, Pf05483, Pf05557, Pf05622, Pf06160, Pf07111, Pf07888, Pf10174, Pf12128, Pf13514, Pf13851, Pf14915	3799	ENSG00000170759.10	KIF5B	10	Insulin Signaling	Endocytosis; Dopaminergic synapse	COPI-dependent Golgi-to-ER retrograde traffic; Kinesins; RHO GTPases activate KTN1; Insulin processing; MHC class II antigen presentation	21	3.668	100	100	100	1.02817e+08	1.20804e+07	4.77992e+07	63112.1	17207.8	16.85	30.25	22.92	15.79	95.91	7.57652e+07	1.03586e+08	1.02817e+08	9.2231e+06	1.68375e+07	1.20804e+07	3.24035e+07	4.77992e+07	5.12858e+07
n/a	High	Master Protein	Q14315	Filamin-C [OS=Homo sapiens]		0	14	36	223	27	2725	290.8	5.97	235.78	cell organization and biogenesis	cytoplasm;cytoskeleton;cytosol;membrane	protein binding	Pf00307, Pf00630	2318	ENSG00000128591.15	FLNC	7		Focal adhesion; Salmonella infection; Proteoglycans in cancer; MAPK signaling pathway	Cell-extracellular matrix interactions	7	17.893	100	100	100	3.04608e+08	1.7439e+08	3.52531e+08	3.37879e+06	188829	18.49	31.84	23.35	17.97	59.24	2.29451e+08	3.32837e+08	3.04608e+08	1.40665e+08	2.589e+08	1.7439e+08	2.2699e+08	3.52843e+08	3.52531e+08
n/a	High	Master Protein	P62424	60S ribosomal protein L7a [OS=Homo sapiens]		0	42	14	174	14	266	30	10.61	77.13	cell organization and biogenesis;metabolic process;transport	cytoplasm;cytosol;membrane;nucleus;ribosome	protein binding;RNA binding;structural molecule activity	Pf01248	6130	ENSG00000280858.2; ENSG00000148303.16	RPL7A	9; CHR_HG2030_PATCH	Cytoplasmic Ribosomal Proteins	Ribosome	Peptide chain elongation; Eukaryotic Translation Termination; Viral mRNA Translation; L13a-mediated translational silencing of Ceruloplasmin expression; Nonsense Mediated Decay (NMD) independent of the Exon Junction Complex (EJC); Selenocysteine synthesis; Nonsense Mediated Decay (NMD) enhanced by the Exon Junction Complex (EJC); GTP hydrolysis and joining of the 60S ribosomal subunit; Major path…	34	27.205	100	100	100	5.61648e+08	1.50587e+08	5.78354e+08	911202	33494.1	21.12	32.91	29.92	70.2	164.67	4.09449e+08	6.29452e+08	5.61648e+08	1.1445e+08	2.19016e+08	1.50587e+08	3.27537e+08	5.78354e+08	5.94367e+08
n/a	High	Master Protein	P50990	T-complex protein 1 subunit theta [OS=Homo sapiens]		0	35	18	118	18	548	59.6	5.6	60.27	cell organization and biogenesis;metabolic process;regulation of biological process;transport	cytoplasm;cytoskeleton;cytosol;extracellular;organelle lumen	catalytic activity;nucleotide binding;protein binding	Pf00118	10694	ENSG00000156261.12	CCT8	21			BBSome-mediated cargo-targeting to cilium; Prefoldin mediated transfer of substrate to CCT/TriC; Cooperation of PDCL (PhLP1) and TRiC/CCT in G-protein beta folding; Association of TriC/CCT with target proteins during biosynthesis; Neutrophil degranulation; Folding of actin by CCT/TriC; Formation of tubulin folding intermediates by CCT/TriC	16	19.127	100	100	100	3.90105e+08	6.79989e+07	1.54436e+08	959172	50146.9	11.96	20.84	27.59	14.39	107.94	3.15396e+08	3.90105e+08	3.92203e+08	5.88727e+07	8.80532e+07	6.79989e+07	9.2196e+07	1.54436e+08	1.58937e+08
n/a	High	Master Protein	P08865	40S ribosomal protein SA [OS=Homo sapiens]		0	44	9	95	9	295	32.8	4.87	119.17	cell organization and biogenesis;metabolic process;transport	cytoplasm;cytosol;membrane;nucleus;ribosome	protein binding;receptor activity;RNA binding;structural molecule activity	Pf00318	3921	ENSG00000168028.13	RPSA	3	Cytoplasmic Ribosomal Proteins	Ribosome	Peptide chain elongation; Eukaryotic Translation Termination; Viral mRNA Translation; Formation of the ternary complex, and subsequently, the 43S complex; L13a-mediated translational silencing of Ceruloplasmin expression; Selenocysteine synthesis; Nonsense Mediated Decay (NMD) independent of the Exon Junction Complex (EJC); Nonsense Mediated Decay (NMD) enhanced by the Exon Junction Complex (EJC)…	38	2.908	100	100	100	7.53552e+07	1.71614e+07	5.70835e+07	47833.9	16446.4	21.45	26.02	33.47	42.64		5.30542e+07	8.16227e+07	7.53552e+07	1.10451e+07	1.87681e+07	1.71614e+07	3.00809e+07	5.70835e+07	5.96413e+07
n/a	High	Master Protein	P27797	Calreticulin [OS=Homo sapiens]		0	38	12	102	12	417	48.1	4.44	63.04	cell differentiation;cell organization and biogenesis;cellular homeostasis;metabolic process;regulation of biological process;response to stimulus;transport	cell surface;cytoplasm;cytosol;endoplasmic reticulum;extracellular;Golgi;membrane;nucleus;organelle lumen	DNA binding;metal ion binding;protein binding;RNA binding	Pf00262	811	ENSG00000179218.13	CALR	19	Androgen receptor signaling pathway; Photodynamic therapy-induced unfolded protein response; Calcium Regulation in the Cardiac Cell	Phagosome; Chagas disease (American trypanosomiasis); HTLV-I infection; Antigen processing and presentation; Protein processing in endoplasmic reticulum	Scavenging by Class F Receptors; Assembly of Viral Components at the Budding Site; ATF6 (ATF6-alpha) activates chaperone genes; Antigen Presentation: Folding, assembly and peptide loading of class I MHC; ER-Phagosome pathway; Calnexin/calreticulin cycle; Scavenging by Class A Receptors	32	7.678	82.188	100	100	2.55396e+07	1.5731e+08	9.81771e+07	2.38587e+06	310747	3.96	67.84	15.44	12.45	55.4	2.45242e+07	2.55396e+07	2.65445e+07	1.5731e+08	3.26924e+07	2.06887e+08	7.4718e+07	9.81771e+07	9.97974e+07
n/a	High	Master Protein	P40926	Malate dehydrogenase, mitochondrial [OS=Homo sapiens]		0	42	12	67	12	338	35.5	8.68	50.1	metabolic process	membrane;mitochondrion;nucleus;organelle lumen	catalytic activity;nucleotide binding;protein binding;RNA binding	Pf00056, Pf01073, Pf01118, Pf02866, Pf13460	4191	ENSG00000146701.11	MDH2	7	Amino Acid metabolism; Glycolysis and Gluconeogenesis; TCA Cycle	Glyoxylate and dicarboxylate metabolism; Pyruvate metabolism; Cysteine and methionine metabolism; Carbon metabolism; Metabolic pathways; Citrate cycle (TCA cycle)	Gluconeogenesis; Citric acid cycle (TCA cycle)	16	6.774	100	100	100	6.23828e+07	1.51047e+07	5.39434e+07	783812	115702	15.9	9.82	24.86	4.02	121.94	5.68715e+07	7.70006e+07	6.23828e+07	1.51047e+07	1.67948e+07	1.38103e+07	3.40996e+07	5.39434e+07	5.53545e+07
n/a	High	Master Protein	P60174-1	Isoform 2 of Triosephosphate isomerase [OS=Homo sapiens]		0	51	12	164	12	249	26.7	6.9	136.65	development;metabolic process	cytosol;nucleus	catalytic activity;protein binding	Pf00121	7167	ENSG00000111669.14	TPI1	12	Fatty Acid Beta Oxidation; Cori Cycle; Glycolysis and Gluconeogenesis			3	6.218	100	100	100	4.67328e+08	5.37782e+07	1.3979e+08	1.471e+06	236557	10.67	22.01	21.19	12.57	104.57	4.20325e+08	5.20412e+08	4.67328e+08	4.76831e+07	7.21475e+07	5.37782e+07	9.40775e+07	1.3979e+08	1.39804e+08
n/a	High	Master Protein	P35232	Prohibitin [OS=Homo sapiens]		0	54	15	109	15	272	29.8	5.76	47.77	cell differentiation;cell organization and biogenesis;metabolic process;regulation of biological process;response to stimulus;transport	cell surface;cytoplasm;endosome;membrane;mitochondrion;nucleus	DNA binding;protein binding	Pf01145	5245	ENSG00000167085.11	PHB	17	Integrated Breast Cancer Pathway		Paradoxical activation of RAF signaling by kinase inactive BRAF; Processing of SMDT1; RAF activation; Signaling by RAS mutants; Signaling by moderate kinase activity BRAF mutants; Interleukin-20 family signaling	19	4.959	100	100	100	3.202e+08	1.54461e+08	4.11536e+08	115891	23370.3	16.33	28.14	27.29	3.71	110.28	2.49838e+08	3.46255e+08	3.202e+08	1.30023e+08	2.21728e+08	1.54461e+08	2.45974e+08	4.19483e+08	4.11536e+08
n/a	High	Master Protein	P27824	Calnexin [OS=Homo sapiens]		0	29	15	83	15	592	67.5	4.6	70.82	metabolic process;regulation of biological process;response to stimulus;transport	cytoplasm;endoplasmic reticulum;membrane;organelle lumen;ribosome	metal ion binding;protein binding;RNA binding	Pf00262	821	ENSG00000127022.14; ENSG00000283777.1	CANX	5; CHR_HG30_PATCH		Thyroid hormone synthesis; HTLV-I infection; Antigen processing and presentation; Phagosome; Protein processing in endoplasmic reticulum	Assembly of Viral Components at the Budding Site; Antigen Presentation: Folding, assembly and peptide loading of class I MHC; Interleukin-35 Signalling; Calnexin/calreticulin cycle; MHC class II antigen presentation	25	96.024	100	100	100	1.05756e+07	9.72052e+06	1.20102e+07	3.50017e+06	36451.1	21.66	35.69	71.64	17.44	72.15	7.32177e+06	1.12619e+07	1.05756e+07	6.81505e+06	1.40448e+07	9.72052e+06	1.60094e+06	1.34154e+07	1.20102e+07
n/a	High	Master Protein	P62979	Ubiquitin-40S ribosomal protein S27a [OS=Homo sapiens]		0	63	10	194	4	156	18	9.64	130.75	cell communication;cell organization and biogenesis;cellular homeostasis;defense response;metabolic process;regulation of biological process;response to stimulus;transport	cytoplasm;cytosol;membrane;nucleus;ribosome	metal ion binding;protein binding;RNA binding;structural molecule activity	Pf00240, Pf01599, Pf11976, Pf13019, Pf13881, Pf14560	6233	ENSG00000143947.13	RPS27A	2	Cytoplasmic Ribosomal Proteins	Ribosome	NOTCH1 Intracellular Domain Regulates Transcription; Activated NOTCH1 Transmits Signal to the Nucleus; Regulation of RAS by GAPs; Viral mRNA Translation; UCH proteinases; ISG15 antiviral mechanism; Regulation of PLK1 Activity at G2/M Transition; Constitutive Signaling by NOTCH1 HD+PEST Domain Mutants; Activated TLR4 signalling; Hh mutants that don't undergo autocatalytic processing are degraded b…	364	1.728	100	100	100	1.8776e+08	1.35512e+08	1.43062e+08	989662	572700	17.57	30.45	25.76	44.5	137.84	1.39082e+08	1.95518e+08	1.8776e+08	1.06593e+08	1.9342e+08	1.35512e+08	9.52951e+07	1.43062e+08	1.62013e+08
n/a	High	Master Protein	P63010-2	Isoform 2 of AP-2 complex subunit beta [OS=Homo sapiens]		0	19	17	119	10	951	105.6	5.34	95.67	cell organization and biogenesis;cellular component movement;metabolic process;regulation of biological process;response to stimulus;transport	cytoplasm;cytosol;membrane	protein binding;transporter activity	Pf01602, Pf02883, Pf09066, Pf12717, Pf13646	163	ENSG00000006125.17	AP2B1	17	Synaptic Vesicle Pathway; EGF/EGFR Signaling Pathway			2	4.117	100	100	100	7.79615e+07	3.30845e+07	7.88617e+07	144697	35143.2	13.04	11.24	21.91	72.47	34.98	7.71162e+07	7.79615e+07	9.64612e+07	2.81708e+07	3.52205e+07	3.30845e+07	5.34603e+07	8.20036e+07	7.88617e+07
n/a	High	Master Protein	P62750	60S ribosomal protein L23a [OS=Homo sapiens]		0	56	10	89	10	156	17.7	10.45	77.43	cell organization and biogenesis;cell proliferation;metabolic process;transport	cytoplasm;cytosol;nucleus;ribosome	protein binding;RNA binding;structural molecule activity	Pf00276, Pf03939	6147	ENSG00000198242.13	RPL23A	17	Cytoplasmic Ribosomal Proteins	Ribosome	Peptide chain elongation; Eukaryotic Translation Termination; Viral mRNA Translation; L13a-mediated translational silencing of Ceruloplasmin expression; Nonsense Mediated Decay (NMD) independent of the Exon Junction Complex (EJC); Selenocysteine synthesis; Nonsense Mediated Decay (NMD) enhanced by the Exon Junction Complex (EJC); GTP hydrolysis and joining of the 60S ribosomal subunit; Major path…	34	0.757	100	100	100	1.93298e+08	2.63282e+07	2.00743e+08	61095.6	80738.4	28.45	41.82	29.24	38.24	59.04	1.11869e+08	1.93298e+08	1.94624e+08	2.19814e+07	4.68084e+07	2.63282e+07	1.22195e+08	2.00743e+08	2.23873e+08
n/a	High	Master Protein	P31689-1	DnaJ homolog subfamily A member 1 [OS=Homo sapiens]		0	35	12	85	12	397	44.8	7.08	92.92	cellular component movement;metabolic process;regulation of biological process;response to stimulus;transport	cytoplasm;cytoskeleton;cytosol;endoplasmic reticulum;membrane;mitochondrion;nucleus	enzyme regulator activity;metal ion binding;nucleotide binding;protein binding	Pf00226, Pf00684, Pf01556	3301	ENSG00000086061.15	DNAJA1	9	Exercise-induced Circadian Regulation	Protein processing in endoplasmic reticulum	HSP90 chaperone cycle for steroid hormone receptors (SHR)	5	74.898	100	100	100	8.23589e+07	7.53511e+07	1.14333e+08	1.37752e+06	18392	4.18	28.93	14.83	21.17	75.3	8.47766e+07	7.80312e+07	8.23589e+07	9.19812e+07	5.0288e+07	7.53511e+07	9.9079e+07	1.14333e+08	1.33293e+08
n/a	High	Master Protein	P45880	Voltage-dependent anion-selective channel protein 2 [OS=Homo sapiens]		0	39	8	72	8	294	31.5	7.56	69.51	regulation of biological process;transport	membrane;mitochondrion;nucleus	nucleotide binding;protein binding;transporter activity	Pf01459	7417	ENSG00000165637.13	VDAC2	10		HTLV-I infection; NOD-like receptor signaling pathway; Calcium signaling pathway; Huntington's disease; Parkinson's disease; cGMP-PKG signaling pathway	Mitochondrial calcium ion transport; Ub-specific processing proteases	12	1.661	100	100	100	1.16785e+08	3.74586e+07	9.70535e+07	22347.1	13457.7	27.49	36.63	25.65	87.02		7.20193e+07	1.16785e+08	1.25906e+08	2.81335e+07	5.75527e+07	3.74586e+07	6.68934e+07	9.70535e+07	1.13729e+08
n/a	High	Master Protein	P23246-1	splicing factor, proline- and glutamine-rich [OS=Homo sapiens]		0	19	13	115	13	707	76.1	9.44	87.96	cell organization and biogenesis;defense response;metabolic process;regulation of biological process;response to stimulus	chromosome;cytoplasm;nucleus	DNA binding;protein binding;RNA binding	Pf00076, Pf08075, Pf13893, Pf14259	6421	ENSG00000116560.10	SFPQ	1	mRNA Processing		PTK6 Regulates Proteins Involved in RNA Processing	5	0.816	100	100	100	1.02708e+08	2.07576e+07	8.13732e+07	140398	172122	18.31	23.94	27.53	33.86	16.06	7.66115e+07	1.10328e+08	1.02708e+08	1.6082e+07	2.61215e+07	2.07576e+07	5.008e+07	8.13732e+07	8.75774e+07
n/a	High	Master Protein	P18124	60S ribosomal protein L7 [OS=Homo sapiens]		0	36	11	126	11	248	29.2	10.65	154.35	cell organization and biogenesis;metabolic process;transport	cytoplasm;cytosol;membrane;nucleus;ribosome	DNA binding;protein binding;RNA binding;structural molecule activity	Pf00327, Pf08079	6129	ENSG00000147604.13	RPL7	8	Cytoplasmic Ribosomal Proteins	Ribosome	Peptide chain elongation; Eukaryotic Translation Termination; Viral mRNA Translation; L13a-mediated translational silencing of Ceruloplasmin expression; Nonsense Mediated Decay (NMD) independent of the Exon Junction Complex (EJC); Selenocysteine synthesis; Nonsense Mediated Decay (NMD) enhanced by the Exon Junction Complex (EJC); GTP hydrolysis and joining of the 60S ribosomal subunit; Major path…	34	0.212	100	100	100	1.51793e+08	8.99412e+07	1.57411e+08	180047	850703	19.34	29.32	24.93	34.1	28.81	1.13966e+08	1.68639e+08	1.51793e+08	7.27554e+07	1.28312e+08	8.99412e+07	1.03948e+08	1.57411e+08	1.7262e+08
n/a	High	Master Protein	Q9UM54-6	Isoform 6 of Unconventional myosin-VI [OS=Homo sapiens]		0	15	18	94	18	1285	148.6	8.56	41.56	cellular component movement;regulation of biological process;response to stimulus;transport	cytoplasm;cytosol;Golgi;membrane;nucleus	catalytic activity;motor activity;nucleotide binding;protein binding	Pf00063, Pf00529	4646		MYO6	6	VEGFA-VEGFR2 Signaling Pathway			1	2.701	100	100	100	1.48141e+08	4.19092e+07	1.42643e+08	348612	129069	10.85	31.61	27.81	6.47	52.39	1.28266e+08	1.5939e+08	1.48141e+08	3.11927e+07	5.8755e+07	4.19092e+07	9.07791e+07	1.42643e+08	1.61471e+08
n/a	High	Master Protein	P50552	Vasodilator-stimulated phosphoprotein [OS=Homo sapiens]		0	23	8	34	8	380	39.8	8.94	32.11	cell organization and biogenesis;cellular component movement;regulation of biological process	cytoplasm;cytoskeleton;cytosol;membrane	protein binding	Pf00568	7408	ENSG00000125753.13	VASP	19	Integrin-mediated Cell Adhesion; Focal Adhesion	Fc gamma R-mediated phagocytosis; Rap1 signaling pathway; Leukocyte transendothelial migration; cGMP-PKG signaling pathway; Platelet activation; Focal adhesion	Cell-extracellular matrix interactions; Generation of second messenger molecules; Signaling by ROBO receptors	18	7.768	100	100	100	2.15728e+07	1.31827e+07	8.11734e+06	233413	30048.3	8.12	20.35	25.94	10.72		2.15728e+07	2.13629e+07	2.46288e+07	9.59574e+06	1.44709e+07	1.31827e+07	6.32051e+06	8.11734e+06	1.06368e+07
n/a	High	Master Protein	P02647	Apolipoprotein A-I [OS=Homo sapiens]		0	55	16	101	16	267	30.8	5.76	73.17	cell organization and biogenesis;cell proliferation;cellular component movement;metabolic process;regulation of biological process;response to stimulus;transport	cell surface;cytosol;endosome;extracellular;membrane;nucleus;organelle lumen	enzyme regulator activity;protein binding;transporter activity	Pf01442	335	ENSG00000118137.9	APOA1	11	Selenium Micronutrient Network; Vitamin B12 Metabolism; Folate Metabolism; PPAR Alpha Pathway; PPAR signaling pathway; Statin Pathway	PPAR signaling pathway; African trypanosomiasis; Fat digestion and absorption; Vitamin digestion and absorption	Post-translational protein phosphorylation; Regulation of Insulin-like Growth Factor (IGF) transport and uptake by Insulin-like Growth Factor Binding Proteins (IGFBPs); Amyloid fiber formation; Scavenging of heme from plasma; Retinoid metabolism and transport; Chylomicron remodeling; HDL assembly; ABC transporters in lipid homeostasis; PPARA activates gene expression; Scavenging by Class A Recept…	46	0.42	63.412	62.43	23.953	6.0518e+07	2.28596e+07	5.95807e+07	400552	954365	26.31	39.86	30.22	9.84	39.12	3.7694e+07	6.37623e+07	6.0518e+07	1.47214e+07	3.35723e+07	2.28596e+07	3.41012e+07	5.95807e+07	6.29732e+07
n/a	High	Master Protein	Q92841	Probable ATP-dependent RNA helicase DDX17 [OS=Homo sapiens]		0	14	11	165	8	729	80.2	8.27	142.22	cell differentiation;cell organization and biogenesis;defense response;metabolic process;regulation of biological process;response to stimulus	cytoplasm;cytosol;membrane;nucleus	catalytic activity;nucleotide binding;protein binding;RNA binding	Pf00270, Pf00271	10521	ENSG00000100201.20	DDX17	22	RIG-I-like Receptor Signaling			1	2.458	100	100	100	4.6757e+08	3.32799e+08	7.79364e+08	419562	170692	15.45	30.28	35.44	20.92	75.56	3.54577e+08	4.72326e+08	4.6757e+08	2.67862e+08	4.80826e+08	3.32799e+08	4.08254e+08	7.79364e+08	8.63733e+08
n/a	High	Master Protein	P62917	60S ribosomal protein L8 [OS=Homo sapiens]		0	28	11	163	11	257	28	11.03	77.68	cell organization and biogenesis;metabolic process;response to stimulus;transport	cytoplasm;cytosol;membrane;ribosome	RNA binding;structural molecule activity	Pf00181, Pf03947	6132	ENSG00000161016.17	RPL8	8	Cytoplasmic Ribosomal Proteins	Ribosome	Peptide chain elongation; Eukaryotic Translation Termination; Viral mRNA Translation; L13a-mediated translational silencing of Ceruloplasmin expression; Nonsense Mediated Decay (NMD) independent of the Exon Junction Complex (EJC); Selenocysteine synthesis; Nonsense Mediated Decay (NMD) enhanced by the Exon Junction Complex (EJC); GTP hydrolysis and joining of the 60S ribosomal subunit; Major path…	34	0.759	100	100	100	5.87813e+08	1.90872e+08	6.57228e+08	128085	168654	18.48	29.46	27.25	107.69	85.87	4.31584e+08	6.20742e+08	5.87813e+08	1.53675e+08	2.72083e+08	1.90872e+08	3.94383e+08	6.73778e+08	6.57228e+08
n/a	High	Master Protein	P49368-1	T-complex protein 1 subunit gamma [OS=Homo sapiens]		0	29	15	133	15	545	60.5	6.49	76.63	cell organization and biogenesis;metabolic process;regulation of biological process;transport	cytoplasm;cytoskeleton;cytosol;membrane	nucleotide binding;protein binding;RNA binding	Pf00118	7203	ENSG00000163468.14	CCT3	1			BBSome-mediated cargo-targeting to cilium; Prefoldin mediated transfer of substrate to CCT/TriC; Cooperation of PDCL (PhLP1) and TRiC/CCT in G-protein beta folding; Association of TriC/CCT with target proteins during biosynthesis; Formation of tubulin folding intermediates by CCT/TriC; Folding of actin by CCT/TriC	13	18.115	100	100	100	2.90877e+08	4.292e+07	1.26787e+08	854068	47147.3	14.28	19.7	29.16	49.37	109.47	2.26968e+08	2.96977e+08	2.90877e+08	4.292e+07	5.92255e+07	4.26014e+07	7.62376e+07	1.26787e+08	1.38871e+08
n/a	High	Master Protein	O75533-1	splicing factor 3B subunit 1 [OS=Homo sapiens]		0	14	15	75	15	1304	145.7	7.09	79.89	cell organization and biogenesis;metabolic process;regulation of biological process;response to stimulus	nucleus;spliceosomal complex	DNA binding;protein binding;receptor activity;RNA binding;signal transducer activity	Pf02161, Pf08920, Pf12815, Pf13513	23451	ENSG00000115524.15	SF3B1	2	mRNA Processing	Spliceosome	B-WICH complex positively regulates rRNA expression; mRNA Splicing - Major Pathway; mRNA Splicing - Minor Pathway	11	6.075	100	100	100	3.93263e+07	7.85829e+06	3.83244e+07	134398	22125	16.33	38.64	23.72	25.5	62.65	3.11462e+07	4.32917e+07	3.93263e+07	7.85829e+06	1.36979e+07	6.92913e+06	2.52803e+07	3.83244e+07	4.04937e+07
n/a	High	Master Protein	P10316	HLA class I histocompatibility antigen, A-69 alpha chain [OS=Homo sapiens]		0	33	9	58	4	365	41	6.9	98.61	regulation of biological process;response to stimulus	cell surface;endoplasmic reticulum;Golgi;membrane	protein binding;RNA binding	Pf00129, Pf07654	3105		HLA-A	6	Proteasome Degradation; Allograft Rejection		Interferon alpha/beta signaling; ER-Phagosome pathway; Immunoregulatory interactions between a Lymphoid and a non-Lymphoid cell; Endosomal/Vacuolar pathway; Interferon gamma signaling; Antigen Presentation: Folding, assembly and peptide loading of class I MHC	14	10.005	100	100	100	2.3782e+07	2.61024e+07	6.59565e+07	561772	56150.6	14.03	15.96	14.41	62.58	101.66	2.95515e+07	2.30216e+07	2.3782e+07	2.61024e+07	2.69663e+07	1.98574e+07	6.74693e+07	6.59565e+07	5.13897e+07
		Master Protein	Q8WZ42-12	Isoform 12 of Titin [OS=Homo sapiens]			2	68	210	68	35991	3992.1	6.39		cell organization and biogenesis;cellular component movement;metabolic process;regulation of biological process;response to stimulus;transport	chromosome;cytosol;extracellular	catalytic activity;metal ion binding;nucleotide binding;protein binding;structural molecule activity	Pf00041, Pf00047, Pf00069, Pf02818, Pf07679, Pf07686, Pf07714, Pf09042, Pf10446, Pf13895, Pf13927	7273		TTN	2	Striated Muscle Contraction			1	12.861	100	100	100	1.17116e+09	5.7858e+08	1.46078e+09	6.82634e+06	530766	15.81	30.51	24.16	5.55	37.17	9.02273e+08	1.22787e+09	1.17116e+09	4.17743e+08	7.78008e+08	5.7858e+08	9.48447e+08	1.46078e+09	1.5285e+09
n/a	High	Master Protein	P27708	CAD protein [OS=Homo sapiens]		0	12	23	157	22	2225	242.8	6.46	95.23	metabolic process	cytoplasm;cytosol;membrane;nucleus	catalytic activity;metal ion binding;nucleotide binding;protein binding	Pf00117, Pf00185, Pf00289, Pf00988, Pf01979, Pf02142, Pf02222, Pf02729, Pf02786, Pf02787, Pf07478, Pf07722, Pf13147, Pf13535, Pf13594, Pf15632	790	ENSG00000084774.13	CAD	2	Endothelin Pathways; Amino Acid metabolism	Metabolic pathways; Pyrimidine metabolism; Alanine, aspartate and glutamate metabolism	Pyrimidine biosynthesis	9	3.332	100	100	100	1.70846e+08	6.39888e+07	1.34379e+08	439451	131896	18.19	22.7	26.74	22.67	55.53	1.42636e+08	1.70846e+08	2.05457e+08	5.68e+07	8.68979e+07	6.39888e+07	8.32598e+07	1.34379e+08	1.42459e+08
n/a	High	Master Protein	P17987	T-complex protein 1 subunit alpha [OS=Homo sapiens]		0	34	20	104	20	556	60.3	6.11	60.82	cell organization and biogenesis;metabolic process;regulation of biological process;response to stimulus;transport	cytoplasm;cytoskeleton;cytosol;Golgi	nucleotide binding;protein binding;RNA binding	Pf00118	6950	ENSG00000120438.11	TCP1	6			BBSome-mediated cargo-targeting to cilium; Prefoldin mediated transfer of substrate to CCT/TriC; Gene and protein expression by JAK-STAT signaling after Interleukin-12 stimulation; Cooperation of PDCL (PhLP1) and TRiC/CCT in G-protein beta folding; Association of TriC/CCT with target proteins during biosynthesis; Folding of actin by CCT/TriC; Formation of tubulin folding intermediates by CCT/TriC…	18	7.744	100	100	100	2.28555e+08	5.65067e+07	1.10399e+08	564044	72838.4	21.3	30.42	19.55	9.98	65.45	1.58032e+08	2.28555e+08	2.4038e+08	3.8807e+07	7.2915e+07	5.65067e+07	7.85712e+07	1.14879e+08	1.10399e+08
n/a	High	Master Protein	P62258-1	14-3-3 protein epsilon [OS=Homo sapiens]		0	38	11	115	9	255	29.2	4.74	109.63	cell organization and biogenesis;cellular component movement;cellular homeostasis;metabolic process;regulation of biological process;response to stimulus;transport	cytoplasm;cytosol;membrane;mitochondrion;nucleus	protein binding;RNA binding	Pf00244	7531	ENSG00000108953.16; ENSG00000274474.3	YWHAE	17; CHR_HSCHR17_2_CTG2	Cell Cycle; Myometrial Relaxation and Contraction Pathways; VEGFA-VEGFR2 Signaling Pathway; Calcium Regulation in the Cardiac Cell; Sudden Infant Death Syndrome (SIDS) Susceptibility Pathways	Cell cycle; Neurotrophin signaling pathway; Oocyte meiosis; Epstein-Barr virus infection; PI3K-Akt signaling pathway; Hippo signaling pathway; Viral carcinogenesis	Regulation of PLK1 Activity at G2/M Transition; Recruitment of NuMA to mitotic centrosomes; Loss of Nlp from mitotic centrosomes; NADE modulates death signalling; Translocation of GLUT4 to the plasma membrane; Deregulated CDK5 triggers multiple neurodegenerative pathways in Alzheimer's disease models; Chk1/Chk2(Cds1) mediated inactivation of Cyclin B:Cdk1 complex; Signaling by Hippo; AURKA Activa…	65	6.812	100	100	100	3.45076e+08	1.72799e+08	2.81861e+08	771023	113184	18.96	26.83	26.86	13.73	106.25	2.48876e+08	3.59913e+08	3.45076e+08	1.41968e+08	2.38883e+08	1.72799e+08	1.73275e+08	2.81861e+08	2.96446e+08
n/a	High	Master Protein	P20702	Integrin alpha-X [OS=Homo sapiens]		0	19	21	84	19	1163	127.7	6.64	75.57	cell organization and biogenesis;cellular component movement;regulation of biological process;response to stimulus;transport	cell surface;membrane	metal ion binding;protein binding;receptor activity	Pf00092, Pf00357, Pf01839, Pf08441, Pf13517, Pf13519	3687	ENSG00000140678.16	ITGAX	16	Integrin-mediated Cell Adhesion; Focal Adhesion; Focal Adhesion-PI3K-Akt-mTOR-signaling pathway; TYROBP Causal Network	Regulation of actin cytoskeleton; Tuberculosis; Complement and coagulation cascades	ECM proteoglycans; Integrin cell surface interactions; Interleukin-4 and 13 signaling; Neutrophil degranulation; Cell surface interactions at the vascular wall	18	22.794	100	100	100	1.18155e+07	6.78846e+06	1.38296e+07	1.10823e+06	48619.2	24.21	48.22	16.11	26.12	62.86	7.88756e+06	1.28809e+07	1.18155e+07	6.78846e+06	1.33967e+07	5.70861e+06	1.08574e+07	1.38296e+07	1.49888e+07
n/a	High	Master Protein	P09429	High mobility group protein B1 [OS=Homo sapiens]		0	40	10	113	9	215	24.9	5.74	82.48	cell differentiation;cell organization and biogenesis;cell proliferation;cellular component movement;cellular homeostasis;defense response;metabolic process;regulation of biological process;response to stimulus;transport	cell surface;chromosome;cytoplasm;endosome;extracellular;membrane;nucleus;organelle lumen	catalytic activity;DNA binding;enzyme regulator activity;protein binding;RNA binding	Pf00505, Pf09011	3146	ENSG00000189403.14	HMGB1	13	Retinoblastoma (RB) in Cancer; DNA Damage Response (only ATM dependent)	Base excision repair	TRAF6 mediated NF-kB activation; Advanced glycosylation endproduct receptor signaling; TAK1 activates NFkB by phosphorylation and activation of IKKs complex; RIP-mediated NFkB activation via ZBP1; Activated TLR4 signalling; Interleukin-1 family signaling; Neutrophil degranulation; Regulation of TLR by endogenous ligand; DEx/H-box helicases activate type I IFN and inflammatory cytokines production…	40	0.428	100	100	100	1.90416e+08	5.72769e+07	1.62702e+08	167123	390897	21.45	6.99	12.31	34.35	94.25	1.90416e+08	1.48997e+08	2.30505e+08	5.35055e+07	6.15322e+07	5.72769e+07	1.30888e+08	1.62702e+08	1.64109e+08
n/a	High	Master Protein	P30050-1	60S ribosomal protein L12 [OS=Homo sapiens]		0	62	8	55	8	165	17.8	9.42	51.57	cell organization and biogenesis;metabolic process;transport	cytosol;membrane;ribosome	protein binding;RNA binding;structural molecule activity	Pf00298, Pf03946	6136	ENSG00000197958.12	RPL12	9	Cytoplasmic Ribosomal Proteins	Ribosome	Peptide chain elongation; Eukaryotic Translation Termination; Viral mRNA Translation; L13a-mediated translational silencing of Ceruloplasmin expression; Nonsense Mediated Decay (NMD) independent of the Exon Junction Complex (EJC); Selenocysteine synthesis; Nonsense Mediated Decay (NMD) enhanced by the Exon Junction Complex (EJC); GTP hydrolysis and joining of the 60S ribosomal subunit; Major path…	34	0.079	100	100	100	4.54969e+07	1.97093e+07	5.14713e+07	6574.08	83419.4	25.02	36.97	27.2	67	46.05	3.0582e+07	4.54969e+07	5.11035e+07	9.39315e+06	2.00567e+07	1.97093e+07	3.05283e+07	5.14713e+07	5.15217e+07
n/a	High	Master Protein	Q99536	Synaptic vesicle membrane protein VAT-1 homolog [OS=Homo sapiens]		0	35	10	69	10	393	41.9	6.29	56.24	metabolic process;regulation of biological process;transport	cytoplasm;extracellular;membrane;mitochondrion;organelle lumen	catalytic activity;metal ion binding	Pf00107, Pf08240, Pf13602	10493	ENSG00000108828.15	VAT1	17			Neutrophil degranulation	3	36.086	100	100	100	2.28925e+07	1.03859e+07	3.31125e+07	270208	7487.97	18.88	31.47	38.95	8.19	54.04	1.64811e+07	2.28925e+07	2.37537e+07	7.64551e+06	1.44121e+07	1.03859e+07	1.49092e+07	3.32662e+07	3.31125e+07
n/a	High	Master Protein	P19338	Nucleolin [OS=Homo sapiens]		0	20	14	123	14	710	76.6	4.7	68.94	regulation of biological process;response to stimulus	cytoplasm;membrane;nucleus	DNA binding;protein binding;RNA binding	Pf00076, Pf13893, Pf14259	4691	ENSG00000115053.15	NCL	2	Pathogenic Escherichia coli infection; VEGFA-VEGFR2 Signaling Pathway	Pathogenic Escherichia coli infection	Major pathway of rRNA processing in the nucleolus and cytosol	7	7.869	100	100	100	3.80048e+08	1.0284e+08	3.28493e+08	210098	26698.4	17.01	25.99	24.79	22.12	69.52	2.84787e+08	3.80048e+08	3.96023e+08	7.18785e+07	1.23119e+08	1.0284e+08	2.11598e+08	3.28493e+08	3.46601e+08
n/a	High	Master Protein	Q93077	Histone H2A type 1-C [OS=Homo sapiens]		0	68	9	271	6	130	14.1	11.05	177.34	regulation of biological process	chromosome;nucleus	DNA binding;protein binding	Pf00125, Pf00808	8334	ENSG00000180573.9	HIST1H2AC	6		Alcoholism; Systemic lupus erythematosus	SIRT1 negatively regulates rRNA expression; UCH proteinases; RMTs methylate histone arginines; Activation of anterior HOX genes in hindbrain development during early embryogenesis; NoRC negatively regulates rRNA expression; Meiotic synapsis; Transcriptional regulation by small RNAs; Meiotic recombination; PRC2 methylates histones and DNA; HDACs deacetylate histones; Formation of the beta-catenin:…	66	0.291	100	100	42.059	1.68031e+09	2.40085e+08	1.56612e+09	1.65914e+06	5.70834e+06	17.86	33.91	27.79	11.65	93.34	1.21035e+09	1.68031e+09	1.68384e+09	1.95706e+08	3.71152e+08	2.40085e+08	9.41226e+08	1.6414e+09	1.56612e+09
n/a	High	Master Protein	P43243	Matrin-3 [OS=Homo sapiens]		0	19	12	59	12	847	94.6	6.25	71.17	defense response;regulation of biological process;response to stimulus	membrane;nucleus	metal ion binding;protein binding;RNA binding;structural molecule activity	Pf00076, Pf13893, Pf14259	9782	ENSG00000015479.18; ENSG00000280987.4	MATR3	5				0	0.175	100	100	100	2.62359e+07	6.61442e+06	2.28334e+07	9615.26	55028.8	17.16	8.62	41.58	93.71	120.02	2.62359e+07	2.07644e+07	2.94028e+07	6.00944e+06	6.61442e+06	7.14522e+06	1.09519e+07	2.73591e+07	2.28334e+07
n/a	High	Master Protein	P59665	Neutrophil defensin 1 [OS=Homo sapiens]		0	34	6	656	6	94	10.2	6.99	259.64	cell organization and biogenesis;cellular component movement;defense response;regulation of biological process;response to stimulus;transport	extracellular;organelle lumen		Pf00323, Pf00879	1667; 728358	ENSG00000206047.2; ENSG00000240247.7	DEFA1; DEFA1B	8			Alpha-defensins; Neutrophil degranulation	6	100	100	100	100	3.05871e+08	8.50437e+09	4.56737e+08	1.23082e+09	1.01271e+06	31.07	28.83	28.05	3.57	70	2.21727e+08	4.16685e+08	3.05871e+08	7.07187e+09	1.225e+10	8.50437e+09	2.68813e+08	4.56737e+08	4.66605e+08
n/a	High	Master Protein	P08311	Cathepsin G [OS=Homo sapiens]		0	44	17	109	17	255	28.8	11.19	60.54	cell organization and biogenesis;defense response;metabolic process;regulation of biological process;response to stimulus;transport	cell surface;extracellular;membrane;nucleus;organelle lumen	catalytic activity;protein binding	Pf00089	1511	ENSG00000100448.3	CTSG	14	ACE Inhibitor Pathway	Lysosome; Neuroactive ligand-receptor interaction; Renin-angiotensin system; Amoebiasis; Systemic lupus erythematosus	Activation of Matrix Metalloproteinases; Regulation of Insulin-like Growth Factor (IGF) transport and uptake by Insulin-like Growth Factor Binding Proteins (IGFBPs); Metabolism of Angiotensinogen to Angiotensins; Antimicrobial peptides; Neutrophil degranulation	17	46.493	100	100	100	4.657e+07	2.89434e+08	6.44059e+07	2.12903e+06	45792.6	0.85	24.08	12.49	6.81	119.48	4.61669e+07	4.657e+07	4.69539e+07	2.59882e+08	4.04833e+08	2.89434e+08	5.44424e+07	6.99619e+07	6.44059e+07
n/a	High	Master Protein	Q8NC51-1	Plasminogen activator inhibitor 1 RNA-binding protein [OS=Homo sapiens]		0	29	13	110	13	408	44.9	8.65	94.13	regulation of biological process	cytoplasm;cytosol;membrane;nucleus	protein binding;RNA binding	Pf04774	26135	ENSG00000142864.14	SERBP1	1	Apoptosis-related network due to altered Notch3 in ovarian cancer			1	33.728	100	100	100	1.95641e+08	2.66723e+07	1.7373e+08	230902	6846.09	17.03	15.71	14.52	114.99	122.32	1.95641e+08	1.44937e+08	2.00303e+08	2.16435e+07	2.97389e+07	2.66723e+07	1.41737e+08	1.89754e+08	1.7373e+08
n/a	High	Master Protein	Q9Y383-3	Isoform 3 of Putative RNA-binding protein Luc7-like 2 [OS=Homo sapiens]		0	29	11	97	11	389	46.2	10.05	90.34	cell organization and biogenesis	spliceosomal complex	protein binding;RNA binding	Pf03194	51631	ENSG00000146963.17	LUC7L2	7				0	5.44	100	100	100	1.99642e+08	4.99494e+07	2.11446e+08	112691	20713.3	11.91	20.05	22.89	18.34	113.52	1.99642e+08	1.99182e+08	2.43593e+08	3.76521e+07	5.66681e+07	4.99494e+07	1.40063e+08	2.11446e+08	2.18908e+08
n/a	High	Master Protein	P04839	Cytochrome b-245 heavy chain [OS=Homo sapiens]		0	22	12	66	12	570	65.3	8.63	52.76	cellular homeostasis;defense response;metabolic process;regulation of biological process;response to stimulus;transport	cytoplasm;endoplasmic reticulum;Golgi;membrane;mitochondrion	catalytic activity;metal ion binding;nucleotide binding;protein binding;transporter activity	Pf00175, Pf00970, Pf01794, Pf08022, Pf08030	1536	ENSG00000165168.7	CYBB	X	Microglia Pathogen Phagocytosis Pathway; Type II interferon signaling (IFNG)	Phagosome; Osteoclast differentiation; Leukocyte transendothelial migration; HIF-1 signaling pathway; AGE-RAGE signaling pathway in diabetic complications; NOD-like receptor signaling pathway	ROS, RNS production in phagocytes; Neutrophil degranulation; Cross-presentation of particulate exogenous antigens (phagosomes); VEGFA-VEGFR2 Pathway; Detoxification of Reactive Oxygen Species; RHO GTPases Activate NADPH Oxidases	26	47.752	8.993	100	75.627	1.16607e+06	9.80643e+06	1.52244e+07	6.19197e+06	129668	80.96	26.4	36.57	25.26	62.05	1.16607e+06	4.1314e+06	1.10875e+06	1.33004e+07	7.91869e+06	9.80643e+06	7.37362e+06	1.52244e+07	1.56588e+07
n/a	High	Master Protein	Q9NZM1	Myoferlin [OS=Homo sapiens]		0	10	18	70	16	2061	234.6	6.18	55.22	cell organization and biogenesis;regulation of biological process;response to stimulus	membrane;nucleus	protein binding	Pf00168, Pf08150, Pf08151, Pf08165	26509	ENSG00000138119.16	MYOF	10	Aryl Hydrocarbon Receptor Pathway; Hepatitis C and Hepatocellular Carcinoma			2	4.63	100	100	100	7.43185e+07	1.95983e+07	5.03032e+07	229185	49501.9	13.41	12.12	29.09	41.91	48.22	5.8412e+07	7.45955e+07	7.43185e+07	1.95983e+07	1.57759e+07	1.96568e+07	2.97518e+07	5.03032e+07	5.37539e+07
n/a	High	Master Protein	P04040	catalase [OS=Homo sapiens]		0	26	13	119	13	527	59.7	7.39	97.83	cell differentiation;cell organization and biogenesis;metabolic process;regulation of biological process;response to stimulus;transport	cytosol;endoplasmic reticulum;extracellular;Golgi;membrane;mitochondrion;organelle lumen;vacuole	antioxidant activity;catalytic activity;metal ion binding;nucleotide binding;protein binding	Pf00199, Pf06628	847	ENSG00000121691.4	CAT	11	Selenium Micronutrient Network; Folate Metabolism; Amyotrophic lateral sclerosis (ALS); Oxidative Stress; Tryptophan metabolism; DNA Damage Response (only ATM dependent)	Glyoxylate and dicarboxylate metabolism; Peroxisome; Longevity regulating pathway; FoxO signaling pathway; Longevity regulating pathway - multiple species; Tryptophan metabolism; Amyotrophic lateral sclerosis (ALS); Carbon metabolism	Neutrophil degranulation; Detoxification of Reactive Oxygen Species	20	16.13	100	100	100	7.43075e+07	3.33001e+07	1.27293e+08	988483	61282.5	11.33	25.81	67.32	29.79	41.43	6.53167e+07	7.43075e+07	8.20475e+07	2.29074e+07	3.90838e+07	3.33001e+07	7.06612e+07	1.27293e+08	2.76927e+08
n/a	High	Master Protein	P11940-1	Polyadenylate-binding protein 1 [OS=Homo sapiens]		0	22	13	78	9	636	70.6	9.5	61.99	metabolic process;regulation of biological process	cytoplasm;cytosol;membrane;nucleus;spliceosomal complex	protein binding;RNA binding;translation regulator activity	Pf00076, Pf00658, Pf13893, Pf14259	26986	ENSG00000070756.15	PABPC1	8	Translation Factors; Endoderm Differentiation	mRNA surveillance pathway; RNA degradation; RNA transport	AUF1 (hnRNP D0) binds and destabilizes mRNA; L13a-mediated translational silencing of Ceruloplasmin expression; Regulation of expression of SLITs and ROBOs; Nonsense Mediated Decay (NMD) independent of the Exon Junction Complex (EJC); Translation initiation complex formation; Nonsense Mediated Decay (NMD) enhanced by the Exon Junction Complex (EJC); Deadenylation of mRNA	24	4.392	100	100	100	8.72817e+07	1.78235e+07	5.97675e+07	191322	43564.2	16.35	35.79	23.48	51.22	74.07	6.58612e+07	8.72817e+07	9.00943e+07	1.04052e+07	2.23611e+07	1.78235e+07	3.92812e+07	6.23127e+07	5.97675e+07
n/a	High	Master Protein	P40227-1	T-complex protein 1 subunit zeta [OS=Homo sapiens]		0	22	11	148	11	531	58	6.68	78.94	metabolic process;regulation of biological process	cytoplasm;cytosol;membrane	nucleotide binding;protein binding;RNA binding	Pf00118, Pf05504	908	ENSG00000146731.10	CCT6A	7			Prefoldin mediated transfer of substrate to CCT/TriC; Cooperation of PDCL (PhLP1) and TRiC/CCT in G-protein beta folding; Association of TriC/CCT with target proteins during biosynthesis; Formation of tubulin folding intermediates by CCT/TriC; Folding of actin by CCT/TriC	9	15.949	100	100	100	4.99723e+08	1.01388e+08	3.24361e+08	235703	14778.6	13.66	23.34	23.61	3.76	143.59	4.00537e+08	5.22352e+08	4.99723e+08	9.82443e+07	1.46361e+08	1.01388e+08	2.09958e+08	3.24361e+08	3.31205e+08
n/a	High	Master Protein	P12270	Nucleoprotein TPR [OS=Homo sapiens]		0	7	17	90	17	2363	267.1	5.02	78.48	cell division;cell organization and biogenesis;metabolic process;regulation of biological process;response to stimulus;transport	chromosome;cytoplasm;cytoskeleton;membrane;nucleus	catalytic activity;motor activity;protein binding;RNA binding;structural molecule activity;transporter activity	Pf00038, Pf01496, Pf01576, Pf02463, Pf03961, Pf04111, Pf05911, Pf07888, Pf07926, Pf09726, Pf12128, Pf13166, Pf13514	7175	ENSG00000047410.13	TPR	1		RNA transport; Thyroid cancer; Pathways in cancer	Rev-mediated nuclear export of HIV RNA; ISG15 antiviral mechanism; NEP/NS2 Interacts with the Cellular Export Machinery; tRNA processing in the nucleus; Transcriptional regulation by small RNAs; Defective TPR may confer susceptibility towards thyroid papillary carcinoma (TPC); Nuclear Pore Complex (NPC) Disassembly; Regulation of Glucokinase by Glucokinase Regulatory Protein; Vpr-mediated nuclear…	69	1.122	100	100	100	1.05292e+08	2.31929e+07	6.19049e+07	83499.3	74447.9	13.06	9.42	22.23	14.61	133.35	1.10349e+08	8.55314e+07	1.05292e+08	2.05772e+07	2.48506e+07	2.31929e+07	4.13749e+07	6.19049e+07	6.35874e+07
n/a	High	Master Protein	Q99832	T-complex protein 1 subunit eta [OS=Homo sapiens]		0	31	15	110	15	543	59.3	7.65	72.23	metabolic process;regulation of biological process;transport	cytoplasm;cytosol;mitochondrion	nucleotide binding;protein binding	Pf00118	10574	ENSG00000135624.15	CCT7	2			Prefoldin mediated transfer of substrate to CCT/TriC; Cooperation of PDCL (PhLP1) and TRiC/CCT in G-protein beta folding; Association of TriC/CCT with target proteins during biosynthesis; Formation of tubulin folding intermediates by CCT/TriC; Folding of actin by CCT/TriC	9	3.754	100	100	100	3.99892e+08	6.58259e+07	2.93053e+08	854732	227706	20.23	31.96	25.53	19	71.96	2.86955e+08	4.2965e+08	3.99892e+08	5.17013e+07	9.62759e+07	6.58259e+07	1.86682e+08	2.93053e+08	3.11307e+08
n/a	High	Master Protein	Q9Y4I1-1	Unconventional myosin-Va [OS=Homo sapiens]		0	10	18	133	18	1855	215.3	8.48	82.62	cell communication;cell differentiation;cell organization and biogenesis;cellular component movement;metabolic process;regulation of biological process;response to stimulus;transport	cytoplasm;cytoskeleton;cytosol;endoplasmic reticulum;endosome;extracellular;Golgi;membrane;vacuole	catalytic activity;metal ion binding;motor activity;nucleotide binding;protein binding;RNA binding	Pf00063, Pf00612, Pf00769, Pf01442, Pf01576, Pf01843, Pf02463, Pf04111, Pf04156, Pf05262, Pf05557, Pf06160, Pf07888, Pf07926, Pf09726, Pf09731, Pf10174, Pf12128, Pf12718, Pf13851, Pf14992, Pf15035, Pf15070	4644	ENSG00000197535.14	MYO5A	15			Translocation of GLUT4 to the plasma membrane; Regulation of actin dynamics for phagocytic cup formation; Insulin processing	10	6.666	100	100	100	1.09764e+08	6.38808e+07	1.09905e+08	407773	61169.8	13.59	22.06	22.44	30.8	29.41	9.72285e+07	1.27382e+08	1.09764e+08	5.52872e+07	8.44293e+07	6.38808e+07	7.40161e+07	1.09905e+08	1.15086e+08
n/a	High	Master Protein	P62269	40S ribosomal protein S18 [OS=Homo sapiens]		0	55	15	179	15	152	17.7	10.99	81.54	cell organization and biogenesis;metabolic process;transport	cytoplasm;cytosol;membrane;nucleus;ribosome	protein binding;RNA binding;structural molecule activity	Pf00416	6222	ENSG00000223367.6; ENSG00000096150.9; ENSG00000235650.6; ENSG00000226225.6; ENSG00000231500.6	RPS18	6; CHR_HSCHR6_MHC_DBB_CTG1; CHR_HSCHR6_MHC_QBL_CTG1; CHR_HSCHR6_MHC_COX_CTG1; CHR_HSCHR6_MHC_MCF_CTG1	Cytoplasmic Ribosomal Proteins	Ribosome	Peptide chain elongation; Eukaryotic Translation Termination; Viral mRNA Translation; Formation of the ternary complex, and subsequently, the 43S complex; L13a-mediated translational silencing of Ceruloplasmin expression; Selenocysteine synthesis; Nonsense Mediated Decay (NMD) independent of the Exon Junction Complex (EJC); Nonsense Mediated Decay (NMD) enhanced by the Exon Junction Complex (EJC)…	38	13.718	100	100	100	6.92103e+08	3.1401e+08	8.10329e+08	824237	60084.4	11.61	27.09	25.2	19.9	135.43	5.77189e+08	7.23839e+08	6.92103e+08	2.63232e+08	4.41817e+08	3.1401e+08	5.1444e+08	8.10329e+08	8.47394e+08
n/a	High	Master Protein	Q04695	Keratin, type I cytoskeletal 17 [OS=Homo sapiens]		0	50	28	181	12	432	48.1	5.02	243.41	cell death;cell organization and biogenesis;regulation of biological process;response to stimulus	cytoplasm;cytoskeleton;cytosol	protein binding;receptor activity;signal transducer activity;structural molecule activity	Pf00038, Pf07888	3872	ENSG00000128422.15	KRT17	17			Formation of the cornified envelope	3	1.056	47.484	26.177	17.231	6.74305e+07	2.44697e+07	3.71728e+07	1.50008e+06	1.42007e+06	32.87	18.09	21.16	23.01	109.92	4.4464e+07	6.74305e+07	8.83202e+07	2.44697e+07	3.17171e+07	2.27458e+07	2.58115e+07	3.91727e+07	3.71728e+07
n/a	High	Master Protein	P78371-1	T-complex protein 1 subunit beta [OS=Homo sapiens]		0	30	17	123	17	535	57.5	6.46	76.74	cell organization and biogenesis;metabolic process;regulation of biological process;transport	cytoplasm;cytosol;extracellular;organelle lumen	nucleotide binding;protein binding	Pf00118	10576	ENSG00000166226.12	CCT2	12			BBSome-mediated cargo-targeting to cilium; Prefoldin mediated transfer of substrate to CCT/TriC; Cooperation of PDCL (PhLP1) and TRiC/CCT in G-protein beta folding; Association of TriC/CCT with target proteins during biosynthesis; Neutrophil degranulation; Folding of actin by CCT/TriC; Formation of tubulin folding intermediates by CCT/TriC	16	23.6	100	100	100	3.10684e+08	1.12414e+08	1.72555e+08	2.67136e+06	113195	5.52	8.98	15.52	14.33	105.39	2.84067e+08	3.14948e+08	3.10684e+08	1.09715e+08	1.29121e+08	1.12414e+08	1.4347e+08	1.96386e+08	1.72555e+08
n/a	High	Master Protein	Q04637-5	Isoform D of Eukaryotic translation initiation factor 4 gamma 1 [OS=Homo sapiens]		0	9	15	90	15	1435	158.4	5.21	85.76	cell organization and biogenesis;defense response;metabolic process;regulation of biological process;response to stimulus	cytoplasm;cytosol;membrane;nucleus	nucleotide binding;protein binding;RNA binding;structural molecule activity	Pf00566, Pf02020, Pf02847, Pf02854	1981	ENSG00000114867.20	EIF4G1	3	Translation Factors			1	1.42	100	100	100	9.76583e+07	1.90739e+07	7.56275e+07	100280	70612	6.37	26.53	18.2	22.66	60.74	9.76583e+07	8.81609e+07	9.94082e+07	1.49138e+07	2.53337e+07	1.90739e+07	5.65381e+07	7.56275e+07	8.12412e+07
n/a	High	Master Protein	P16284-3	Isoform Delta13 of Platelet endothelial cell adhesion molecule [OS=Homo sapiens]		0	18	12	53	12	717	80.2	7.33	52.51	cell organization and biogenesis;cellular component movement;regulation of biological process;response to stimulus;transport	membrane	protein binding	Pf00047, Pf07679, Pf13895, Pf13927	5175		PECAM1	17				0	41.004	100	100	100	1.04457e+08	3.43002e+07	9.29341e+07	2.14523e+06	52318.2	13.66	28.14	26.05	26.3	95.28	8.19564e+07	1.04457e+08	1.05459e+08	2.45777e+07	4.38455e+07	3.43002e+07	5.69831e+07	9.29341e+07	9.44884e+07
n/a	High	Master Protein	Q8N423-1	Leukocyte immunoglobulin-like receptor subfamily B member 2 [OS=Homo sapiens]		0	17	7	38	7	598	65	7.23	40.03	cell communication;defense response;regulation of biological process;response to stimulus;transport	cell surface;cytoplasm;membrane	protein binding;receptor activity;signal transducer activity	Pf00047, Pf13895, Pf13927	10288	ENSG00000275463.4	LILRB2	19; CHR_HSCHR19_4_CTG3_1			Neutrophil degranulation; Immunoregulatory interactions between a Lymphoid and a non-Lymphoid cell	5	7.375	27.392	29.822	25.418	4.0091e+06	3.72011e+06	4.36481e+06	1.07935e+06	146360	53.4	4.69	47.76	14.12	22.38	4.0091e+06	7.66231e+06	2.72364e+06	3.72011e+06	4.01477e+06	3.69241e+06	4.36481e+06	3.9735e+06	8.91379e+06
n/a	High	Master Protein	P78324	tyrosine-protein phosphatase non-receptor type substrate 1 [OS=Homo sapiens]		0	21	11	56	10	504	54.9	6.98	57.93	cellular component movement;transport	membrane	protein binding	Pf00047, Pf07654, Pf07679, Pf07686, Pf08205	140885	ENSG00000198053.11	SIRPA	20	Prolactin Signaling Pathway; Brain-Derived Neurotrophic Factor (BDNF) signaling pathway; Cardiac Progenitor Differentiation	Osteoclast differentiation	Neutrophil degranulation; Cell surface interactions at the vascular wall; Signal regulatory protein family interactions	11	73.346	84.846	50.767	52.764	3.40781e+06	2.11923e+06	2.03905e+06	2.94591e+06	40164.5	84.02	56.63	55.23	26.66	10.38	2.0777e+06	1.03264e+07	3.40781e+06	2.95514e+06	2.11923e+06	769208	709407	2.03905e+06	2.65688e+06
n/a	High	Master Protein	Q13162	Peroxiredoxin-4 [OS=Homo sapiens]		0	41	8	54	7	271	30.5	6.29	47.44	cell organization and biogenesis;cellular homeostasis;metabolic process;regulation of biological process;transport	cytoplasm;cytosol;endoplasmic reticulum;extracellular;mitochondrion;nucleus;organelle lumen	antioxidant activity;catalytic activity;protein binding	Pf00578, Pf08534, Pf10417	10549	ENSG00000123131.12	PRDX4	X	Selenium Micronutrient Network		Neutrophil degranulation	4	4.67	100	100	100	1.50467e+08	4.82421e+07	2.18269e+08	23822.7	5101.18	15.17	33	30.17		127.82	1.50467e+08	1.40328e+08	1.86256e+08	3.10066e+07	6.20205e+07	4.82421e+07	1.22725e+08	2.18269e+08	2.23705e+08
n/a	High	Master Protein	Q16181	Septin-7 [OS=Homo sapiens]		0	24	9	80	9	437	50.6	8.63	66.71	cell differentiation;cell division;cell organization and biogenesis;regulation of biological process	chromosome;cytoplasm;cytoskeleton;cytosol;membrane;nucleus	nucleotide binding;protein binding;structural molecule activity	Pf00735, Pf01926, Pf10211	989		SEPT7	7			MAPK6/MAPK4 signaling	3	100	100	100	100	4.65647e+07	5.33943e+06	2.50962e+07	38390.8		31.72	17.59	54.46	73.97		2.68512e+07	5.20954e+07	4.65647e+07	4.25248e+06	6.07899e+06	5.33943e+06	1.30541e+07	4.20227e+07	2.50962e+07
n/a	High	Master Protein	Q9ULV4	coronin-1C [OS=Homo sapiens]		0	31	15	124	15	474	53.2	7.08	64.13	cell organization and biogenesis;cellular component movement;regulation of biological process;response to stimulus;transport	cytoplasm;cytoskeleton;membrane	protein binding	Pf00400, Pf08953, Pf08954	23603	ENSG00000110880.10	CORO1C	12				0	23.237	100	100	100	2.22827e+08	1.60964e+08	4.378e+08	436490	18784.5	18.35	26.47	19.49	124.81	127.07	2.22827e+08	1.82378e+08	2.64254e+08	1.50678e+08	2.39584e+08	1.60964e+08	3.2006e+08	4.378e+08	4.72603e+08
n/a	High	Master Protein	Q12792-2	Twinfilin-1 [OS=Homo sapiens]		0	25	10	62	8	350	40.3	6.96	41.93	cell organization and biogenesis;regulation of biological process	cytoplasm;cytoskeleton;cytosol	catalytic activity;nucleotide binding;protein binding	Pf00241	5756	ENSG00000151239.13	TWF1	12				0	2.222	100	100	100	3.56397e+07	1.77465e+07	7.34195e+07	56724.8	25528.7	15.96	21	25.63	152.54	87.04	3.49092e+07	3.56397e+07	4.59983e+07	1.30595e+07	2.00436e+07	1.77465e+07	4.60354e+07	7.34195e+07	7.63787e+07
n/a	High	Master Protein	O00571	ATP-dependent RNA helicase DDX3X [OS=Homo sapiens]		0	23	15	138	15	662	73.2	7.18	75.06	cell death;cell organization and biogenesis;defense response;metabolic process;regulation of biological process;response to stimulus;transport	cytoplasm;cytosol;extracellular;membrane;mitochondrion;nucleus;organelle lumen	catalytic activity;DNA binding;enzyme regulator activity;nucleotide binding;protein binding;RNA binding	Pf00270, Pf00271, Pf04851	1654	ENSG00000215301.9	DDX3X	X	RIG-I-like Receptor Signaling	Hepatitis B; RIG-I-like receptor signaling pathway; Viral carcinogenesis	Neutrophil degranulation	7	10.729	100	100	100	2.1278e+08	8.80392e+07	2.48877e+08	588197	54824.8	12.99	10.6	27.36	51.85	102.04	2.02093e+08	2.1278e+08	2.56959e+08	8.80392e+07	7.28786e+07	8.82066e+07	1.50731e+08	2.48877e+08	2.60121e+08
n/a	High	Master Protein	P00558	phosphoglycerate kinase 1 [OS=Homo sapiens]		0	37	14	90	14	417	44.6	8.1	53.89	cell differentiation;metabolic process;regulation of biological process;response to stimulus	cytoplasm;cytosol;membrane	catalytic activity;nucleotide binding;protein binding	Pf00162	5230	ENSG00000102144.13	PGK1	X	Cori Cycle; Photodynamic therapy-induced HIF-1 survival signaling; Glycolysis and Gluconeogenesis	HIF-1 signaling pathway; Glycolysis / Gluconeogenesis; Metabolic pathways; Carbon metabolism; Biosynthesis of amino acids	Gluconeogenesis; Glycolysis	13	53.814	100	100	100	9.73283e+07	4.17417e+07	7.00081e+07	1.19061e+07	221243	11.32	18.82	21.05	29.13	104.88	8.50229e+07	1.06786e+08	9.73283e+07	3.60277e+07	5.21006e+07	4.17417e+07	4.76477e+07	7.00081e+07	7.11267e+07
n/a	High	Master Protein	P61247	40S ribosomal protein S3a [OS=Homo sapiens]		0	45	13	64	13	264	29.9	9.73	58.86	cell differentiation;cell organization and biogenesis;metabolic process;regulation of biological process;transport	cytoplasm;cytosol;endoplasmic reticulum;nucleus;ribosome	protein binding;RNA binding;structural molecule activity	Pf01015	6189	ENSG00000145425.9	RPS3A	4	Cytoplasmic Ribosomal Proteins	Ribosome	Peptide chain elongation; Eukaryotic Translation Termination; Viral mRNA Translation; Formation of the ternary complex, and subsequently, the 43S complex; L13a-mediated translational silencing of Ceruloplasmin expression; Selenocysteine synthesis; Nonsense Mediated Decay (NMD) independent of the Exon Junction Complex (EJC); Nonsense Mediated Decay (NMD) enhanced by the Exon Junction Complex (EJC)…	38	6.84	100	100	100	9.52945e+07	2.84148e+07	1.01451e+08	931721	136217	18.96	30.31	30.21	6.35	60.56	6.84559e+07	9.52945e+07	9.87853e+07	2.43925e+07	4.2764e+07	2.84148e+07	6.20097e+07	1.01451e+08	1.16667e+08
n/a	High	Master Protein	P15144	aminopeptidase N [OS=Homo sapiens]		0	14	14	66	14	967	109.5	5.48	46.24	cell communication;cell differentiation;development;metabolic process;regulation of biological process;response to stimulus;transport	membrane;nucleus	catalytic activity;metal ion binding;receptor activity	Pf01433, Pf10023, Pf11838, Pf13485	290	ENSG00000166825.13	ANPEP	15	Glutathione metabolism; Cardiac Progenitor Differentiation	Renin-angiotensin system; Metabolic pathways; Hematopoietic cell lineage; Glutathione metabolism	Metabolism of Angiotensinogen to Angiotensins; Neutrophil degranulation	12	21.402	100	100	84.523	6.53552e+06	4.47512e+06	2.10139e+07	1.13315e+06	52945.3	32.33	35.82	35.68	30.03	116.33	6.53552e+06	5.74874e+06	1.0303e+07	3.39164e+06	6.82311e+06	4.47512e+06	1.11023e+07	2.10139e+07	2.37132e+07
n/a	High	Master Protein	P05387	60S acidic ribosomal protein P2 [OS=Homo sapiens]		0	40	6	69	6	115	11.7	4.54	55.48	cell organization and biogenesis;metabolic process;transport	cytosol;membrane;ribosome	protein binding;structural molecule activity	Pf00428	6181	ENSG00000177600.8	RPLP2	11	Cytoplasmic Ribosomal Proteins	Ribosome	Peptide chain elongation; Eukaryotic Translation Termination; Viral mRNA Translation; L13a-mediated translational silencing of Ceruloplasmin expression; Nonsense Mediated Decay (NMD) independent of the Exon Junction Complex (EJC); Selenocysteine synthesis; Nonsense Mediated Decay (NMD) enhanced by the Exon Junction Complex (EJC); GTP hydrolysis and joining of the 60S ribosomal subunit; Major path…	34	5.035	100	100	100	2.99878e+08	1.22603e+08	3.33925e+08	206172	40946.9	20.86	27.33	29.1	30.61	46.62	2.2043e+08	3.37183e+08	2.99878e+08	9.01462e+07	1.57602e+08	1.22603e+08	1.92264e+08	3.33925e+08	3.42003e+08
n/a	High	Master Protein	P25398	40S ribosomal protein S12 [OS=Homo sapiens]		0	48	5	83	5	132	14.5	7.21	94.28	cell organization and biogenesis;metabolic process;transport	cytoplasm;cytosol;membrane;ribosome	RNA binding;structural molecule activity	Pf01248	6206	ENSG00000112306.7	RPS12	6	Cytoplasmic Ribosomal Proteins	Ribosome	Peptide chain elongation; Eukaryotic Translation Termination; Viral mRNA Translation; Formation of the ternary complex, and subsequently, the 43S complex; L13a-mediated translational silencing of Ceruloplasmin expression; Selenocysteine synthesis; Nonsense Mediated Decay (NMD) independent of the Exon Junction Complex (EJC); Nonsense Mediated Decay (NMD) enhanced by the Exon Junction Complex (EJC)…	38	38.426	100	100	100	1.05213e+08	4.71174e+07	1.11867e+08	461326	12005.7	22.43	27.29	28.62	36.01	138.32	6.98124e+07	1.07477e+08	1.05213e+08	3.23101e+07	5.69582e+07	4.71174e+07	6.92676e+07	1.11867e+08	1.25241e+08
n/a	High	Master Protein	P61254	60S ribosomal protein L26 [OS=Homo sapiens]		0	54	11	126	11	145	17.2	10.55	96.97	cell organization and biogenesis;metabolic process;regulation of biological process;response to stimulus;transport	cytoplasm;cytosol;membrane;ribosome	protein binding;RNA binding;structural molecule activity	Pf00467	6154	ENSG00000161970.12	RPL26	17	Cytoplasmic Ribosomal Proteins	Ribosome	Peptide chain elongation; Eukaryotic Translation Termination; Viral mRNA Translation; L13a-mediated translational silencing of Ceruloplasmin expression; Nonsense Mediated Decay (NMD) independent of the Exon Junction Complex (EJC); Selenocysteine synthesis; Nonsense Mediated Decay (NMD) enhanced by the Exon Junction Complex (EJC); GTP hydrolysis and joining of the 60S ribosomal subunit; Major path…	34	7.428	100	100	100	3.39045e+08	5.91324e+07	3.63944e+08	289108	38920.9	9.17	8.15	26.48	114.84	101.34	3.13523e+08	3.39045e+08	3.76051e+08	5.29322e+07	6.22282e+07	5.91324e+07	2.22279e+08	3.63944e+08	3.73566e+08
n/a	High	Master Protein	P62158	Calmodulin [OS=Homo sapiens]		0	43	9	89	7	149	16.8	4.22	47.87	metabolic process;regulation of biological process;response to stimulus;transport	cytoplasm;cytoskeleton;cytosol;extracellular;membrane	catalytic activity;enzyme regulator activity;metal ion binding;protein binding;transporter activity	Pf00036, Pf08726, Pf12763, Pf13202, Pf13405, Pf13499, Pf13833, Pf14658	808; 805; 801	ENSG00000160014.16; ENSG00000143933.16; ENSG00000198668.10	CALM3; CALM2; CALM1	19; 2; 14	Physiological and Pathological Hypertrophy of the Heart; MicroRNAs in cardiomyocyte hypertrophy; Alzheimers Disease; Endothelin Pathways; T-Cell Receptor and Co-stimulatory Signaling; Common Pathways Underlying Drug Addiction; Cardiac Hypertrophic Response; Myometrial Relaxation and Contraction Pathways; Melatonin metabolism and effects; G Protein Signaling Pathways; T-Cell antigen Receptor (TCR)…	Inflammatory mediator regulation of TRP channels; cAMP signaling pathway; Dopaminergic synapse; Amphetamine addiction; Rap1 signaling pathway; Circadian entrainment; Adrenergic signaling in cardiomyocytes; Pertussis; Oocyte meiosis; GnRH signaling pathway; Calcium signaling pathway; Insulin signaling pathway; Neurotrophin signaling pathway; Olfactory transduction; Phosphatidylinositol signaling s…	Smooth Muscle Contraction; Uptake and function of anthrax toxins; Stimuli-sensing channels; Translocation of GLUT4 to the plasma membrane; Synthesis of IP3 and IP4 in the cytosol; Reduction of cytosolic Ca++ levels; CREB phosphorylation through the activation of CaMKII; Ion homeostasis; Ca2+ pathway; Phase 0 - rapid depolarisation; Calcineurin activates NFAT; Platelet degranulation ; eNOS activat…	150	21.407	100	100	100	4.22469e+08	1.69358e+08	3.33934e+08	1.45083e+06	67773.2	20.73	29.49	36.71	28.92	103.94	3.02827e+08	4.22469e+08	4.59399e+08	1.15165e+08	2.12725e+08	1.69358e+08	1.69054e+08	3.33934e+08	3.68786e+08
n/a	High	Master Protein	P41091	eukaryotic translation initiation factor 2 subunit 3 [OS=Homo sapiens]		0	36	14	101	14	472	51.1	8.4	72.94	metabolic process;transport	cytoplasm;cytosol;nucleus	catalytic activity;nucleotide binding;protein binding;RNA binding	Pf00009, Pf03144, Pf09173	1968	ENSG00000130741.10	EIF2S3	X	Translation Factors	RNA transport	Formation of the ternary complex, and subsequently, the 43S complex; L13a-mediated translational silencing of Ceruloplasmin expression; ABC-family proteins mediated transport; Translation initiation complex formation; GTP hydrolysis and joining of the 60S ribosomal subunit; Recycling of eIF2:GDP; Ribosomal scanning and start codon recognition	15	7.497	100	100	100	1.26409e+08	4.33536e+07	1.28725e+08	56825.8	7579.49	15.58	30.67	22.76	15.47	122.27	9.78083e+07	1.32519e+08	1.26409e+08	3.51655e+07	6.33591e+07	4.33536e+07	8.517e+07	1.28725e+08	1.32412e+08
n/a	High	Master Protein	Q05682-6	Isoform 6 of Caldesmon [OS=Homo sapiens]		0	17	14	96	14	563	65.6	6.62	83.96	cellular component movement	cytoskeleton;cytosol;membrane	protein binding	Pf02029	800	ENSG00000122786.19	CALD1	7	Myometrial Relaxation and Contraction Pathways			1	1.26	100	100	100	1.76317e+08	4.81205e+07	1.90024e+08	28055.6	22273.9	18.39	21.06	24.43	4.41	19.5	1.5571e+08	2.22064e+08	1.76317e+08	4.37137e+07	6.45452e+07	4.81205e+07	1.33783e+08	1.90024e+08	2.21432e+08
n/a	High	Master Protein	P61626	lysozyme c [OS=Homo sapiens]		0	61	10	88	10	148	16.5	9.16	57.04	defense response;metabolic process;response to stimulus;transport	extracellular;organelle lumen	catalytic activity;protein binding	Pf00062	4069	ENSG00000090382.6	LYZ	12		Salivary secretion	Antimicrobial peptides; Neutrophil degranulation; Amyloid fiber formation	7	19.155	100	100	100	4.57419e+07	2.19429e+08	6.0692e+07	1.9842e+06	103587	15	23.52	16.2	32.78	19.59	4.57419e+07	5.49052e+07	4.09737e+07	1.98116e+08	3.05162e+08	2.19429e+08	4.58213e+07	6.2409e+07	6.0692e+07
n/a	High	Master Protein	Q09028	Histone-binding protein RBBP4 [OS=Homo sapiens]		0	27	7	52	5	425	47.6	4.89	51.99	cell organization and biogenesis;metabolic process;regulation of biological process;response to stimulus	cytosol;nucleus	catalytic activity;DNA binding;protein binding	Pf00400, Pf12265	5928	ENSG00000162521.18	RBBP4	1	Retinoblastoma (RB) in Cancer; Interactome of polycomb repressive complex 2 (PRC2)		Regulation of TP53 Activity through Acetylation; Polo-like kinase mediated events; PKMTs methylate histone lysines; Activation of anterior HOX genes in hindbrain development during early embryogenesis; Cyclin A:Cdk2-associated events at S phase entry; Deposition of new CENPA-containing nucleosomes at the centromere; Transcription of E2F targets under negative control by p107 (RBL1) and p130 (RBL2…	50	2.082	100	100	100	2.44231e+07	1.29729e+07	2.78391e+07	98594.9	47363.6	20.22	25.5	26.68	44.81	50.58	1.77393e+07	2.44231e+07	2.66513e+07	9.0337e+06	1.53097e+07	1.29729e+07	1.69055e+07	2.78391e+07	2.8508e+07
n/a	High	Master Protein	P46777	60S ribosomal protein L5 [OS=Homo sapiens]		0	38	12	138	12	297	34.3	9.72	81.57	cell organization and biogenesis;metabolic process;regulation of biological process;transport	cytoplasm;cytosol;membrane;nucleus;ribosome	protein binding;RNA binding;structural molecule activity	Pf00861, Pf14204	6125	ENSG00000122406.12	RPL5	1	Cytoplasmic Ribosomal Proteins	Ribosome	Peptide chain elongation; Eukaryotic Translation Termination; Viral mRNA Translation; L13a-mediated translational silencing of Ceruloplasmin expression; Nonsense Mediated Decay (NMD) independent of the Exon Junction Complex (EJC); Selenocysteine synthesis; Nonsense Mediated Decay (NMD) enhanced by the Exon Junction Complex (EJC); GTP hydrolysis and joining of the 60S ribosomal subunit; Major path…	34	1.407	100	100	100	3.88874e+08	1.40019e+08	4.26771e+08	247160	175708	5.43	22.97	18.57	31.41	56.56	3.58359e+08	3.97957e+08	3.88874e+08	1.13932e+08	1.79893e+08	1.40019e+08	3.27244e+08	4.26771e+08	4.76986e+08
n/a	High	Master Protein	P07910-2	Isoform C1 of Heterogeneous nuclear ribonucleoproteins C1/C2 [OS=Homo sapiens]		0	33	9	88	9	293	32.3	5.08	52.09	cell differentiation;cell organization and biogenesis;metabolic process;regulation of biological process	cytoskeleton;cytosol;extracellular;membrane;nucleus;spliceosomal complex	DNA binding;protein binding;RNA binding	Pf00076, Pf13893, Pf14259	3183	ENSG00000092199.17	HNRNPC	14	mRNA Processing			1	4.143	100	100	100	1.44222e+08	4.6802e+07	1.53968e+08	329848	79613	21.74	24.25	33.67	24.8	60.53	1.03745e+08	1.44222e+08	1.61595e+08	3.25729e+07	5.36562e+07	4.6802e+07	8.23726e+07	1.53968e+08	1.65771e+08
n/a	High	Master Protein	P55060-3	Isoform 3 of Exportin-2 [OS=Homo sapiens]		0	15	14	91	14	945	107.7	5.82	79.78	cell death;cell proliferation;transport	cytoplasm;cytosol;membrane;nucleus	protein binding;transporter activity	Pf03378, Pf03810, Pf08506	1434		CSE1L	20				0	29.402	100	100	100	1.14214e+08	2.53777e+07	9.82799e+07	328639	11177.5	16.6	28.56	29.19	92.61	128.58	9.1375e+07	1.14214e+08	1.27894e+08	2.16636e+07	3.6999e+07	2.53777e+07	6.04506e+07	9.82799e+07	1.10846e+08
n/a	High	Master Protein	P61106	Ras-related protein Rab-14 [OS=Homo sapiens]		0	48	8	51	7	215	23.9	6.21	36.64	cell organization and biogenesis;defense response;metabolic process;regulation of biological process;response to stimulus;transport	cytosol;endoplasmic reticulum;endosome;Golgi;membrane;vacuole	catalytic activity;nucleotide binding;protein binding	Pf00009, Pf00025, Pf00071, Pf04670, Pf08477	51552	ENSG00000119396.10	RAB14	9	Focal Adhesion-PI3K-Akt-mTOR-signaling pathway	AMPK signaling pathway	Translocation of GLUT4 to the plasma membrane; Neutrophil degranulation; Synthesis of PIPs at the plasma membrane; RAB GEFs exchange GTP for GDP on RABs; RAB geranylgeranylation	18	100	100	100	100	4.52736e+07	2.74821e+07	5.14847e+07	133159		12.34	23.71	28.04	42.52		3.80416e+07	4.86769e+07	4.52736e+07	2.34256e+07	3.69578e+07	2.74821e+07	3.22568e+07	5.14847e+07	5.75559e+07
n/a	High	Master Protein	O60701	UDP-glucose 6-dehydrogenase [OS=Homo sapiens]		0	27	12	72	12	494	55	7.12	58.25	metabolic process	cytosol;nucleus	catalytic activity;nucleotide binding	Pf00984, Pf03720, Pf03721	7358	ENSG00000109814.11	UGDH	4	Glucuronidation	Metabolic pathways; Amino sugar and nucleotide sugar metabolism; Pentose and glucuronate interconversions; Ascorbate and aldarate metabolism	Formation of the active cofactor, UDP-glucuronate	10	3.648	100	100	100	9.81457e+07	2.2303e+07	5.59391e+07	183248	50233.3	21.46	32.57	36.25	19.4	43.98	6.60033e+07	9.90821e+07	9.81457e+07	1.46095e+07	2.88786e+07	2.2303e+07	2.85777e+07	5.59391e+07	6.15766e+07
n/a	High	Master Protein	Q7KZF4	staphylococcal nuclease domain-containing protein 1 [OS=Homo sapiens]		0	15	12	62	12	910	101.9	7.17	59.21	cell differentiation;metabolic process;regulation of biological process	cytoplasm;cytosol;membrane;mitochondrion;nucleus	catalytic activity;protein binding;RNA binding	Pf00565, Pf00567	27044	ENSG00000197157.10	SND1	7		Viral carcinogenesis; Epstein-Barr virus infection	Signaling by BRAF and RAF fusions	6	5.818	100	100	100	5.64806e+07	1.84898e+07	5.33889e+07	53519.7	9198.42	16.82	18.05	20.58	39.8	65.02	4.92014e+07	5.64806e+07	6.8537e+07	1.74044e+07	2.41298e+07	1.84898e+07	3.65504e+07	5.38757e+07	5.33889e+07
n/a	High	Master Protein	P62873	Guanine nucleotide-binding protein G(I)/G(S)/G(T) subunit beta-1 [OS=Homo sapiens]		0	26	9	139	5	340	37.4	6	86.64	cell death;cell organization and biogenesis;cell proliferation;cellular homeostasis;metabolic process;regulation of biological process;response to stimulus	cytosol;membrane	catalytic activity;protein binding;signal transducer activity	Pf00400	2782	ENSG00000078369.17	GNB1	1	Nicotine Activity on Dopaminergic Neurons; Human Thyroid Stimulating Hormone (TSH) signaling pathway; Corticotropin-releasing hormone signaling pathway; Myometrial Relaxation and Contraction Pathways; G Protein Signaling Pathways; Chemokine signaling pathway; Focal Adhesion-PI3K-Akt-mTOR-signaling pathway; Calcium Regulation in the Cardiac Cell; Estrogen signaling pathway	Dopaminergic synapse; Ras signaling pathway; Retrograde endocannabinoid signaling; Circadian entrainment; Phototransduction; Cholinergic synapse; Alcoholism; Pathways in cancer; Olfactory transduction; PI3K-Akt signaling pathway; Serotonergic synapse; Chemokine signaling pathway; GABAergic synapse; Morphine addiction; Glutamatergic synapse	G alpha (z) signalling events; Activation of G protein gated Potassium channels; Cooperation of PDCL (PhLP1) and TRiC/CCT in G-protein beta folding; Glucagon-type ligand receptors; Thromboxane signalling through TP receptor; ADP signalling through P2Y purinoceptor 1; Olfactory Signaling Pathway; G beta:gamma signalling through PI3Kgamma; Vasopressin regulates renal water homeostasis via Aquaporin…	84	45.771	100	100	100	1.67764e+08	5.74821e+07	1.75412e+08	1.7679e+06	38625	15.14	18.87	25.62	11.86	78.66	1.28415e+08	1.70519e+08	1.67764e+08	5.74821e+07	7.84379e+07	5.72905e+07	1.08479e+08	1.78173e+08	1.75412e+08
n/a	High	Master Protein	Q13200	26S proteasome non-ATPase regulatory subunit 2 [OS=Homo sapiens]		0	17	14	89	14	908	100.1	5.2	65.33	metabolic process;regulation of biological process;response to stimulus;transport	cytoplasm;cytosol;extracellular;membrane;nucleus;organelle lumen;proteasome	catalytic activity;enzyme regulator activity;nucleotide binding;protein binding	Pf01851	5708	ENSG00000175166.16	PSMD2	3	Proteasome Degradation; TNF alpha Signaling Pathway; Parkin-Ubiquitin Proteasomal System pathway	Epstein-Barr virus infection; Proteasome	Regulation of RAS by GAPs; CDT1 association with the CDC6:ORC:origin complex; Downstream TCR signaling; UCH proteinases; NIK-->noncanonical NF-kB signaling; Hh mutants that don't undergo autocatalytic processing are degraded by ERAD; SCF-beta-TrCP mediated degradation of Emi1; Neutrophil degranulation; Cross-presentation of soluble exogenous antigens (endosomes); Separation of Sister Chromatids; …	154	1.288	100	100	100	5.55399e+07	2.34516e+07	4.0066e+07	14488	11250.6	19.28	8.13	18.82	96.81	116.8	4.48488e+07	6.62646e+07	5.55399e+07	2.34516e+07	2.16606e+07	2.54845e+07	2.96276e+07	4.0066e+07	4.31306e+07
n/a	High	Master Protein	Q14974	Importin subunit beta-1 [OS=Homo sapiens]		0	19	14	94	14	876	97.1	4.78	69.31	cell organization and biogenesis;cellular component movement;metabolic process;regulation of biological process;response to stimulus;transport	cytoplasm;cytosol;extracellular;membrane;nucleus;organelle lumen	metal ion binding;protein binding;RNA binding;transporter activity	Pf02985, Pf03810, Pf13513, Pf13646	3837	ENSG00000108424.9	KPNB1	17	Sterol Regulatory Element-Binding Proteins (SREBP) signalling	RNA transport	ISG15 antiviral mechanism; NS1 Mediated Effects on Host Pathways; Nuclear import of Rev protein; Neutrophil degranulation; Regulation of cholesterol biosynthesis by SREBP (SREBF); Transport of Ribonucleoproteins into the Host Nucleus; Activation of DNA fragmentation factor	29	100	100	100	100	2.00876e+08	2.48348e+07	1.30989e+08	1.39698e+06	10846.9	20.12	37.08	23.58	42.72	99.69	1.52277e+08	2.29606e+08	2.00876e+08	1.97914e+07	3.98655e+07	2.48348e+07	8.51726e+07	1.30989e+08	1.34677e+08
n/a	High	Master Protein	P06756	Integrin alpha-V [OS=Homo sapiens]		0	17	19	101	19	1048	116	5.68	57.54	cell differentiation;cell growth;cell organization and biogenesis;cellular component movement;cellular homeostasis;metabolic process;regulation of biological process;response to stimulus;transport	cell surface;cytosol;membrane	metal ion binding;protein binding;receptor activity;signal transducer activity;transporter activity	Pf01839, Pf08441, Pf13517	3685	ENSG00000138448.11	ITGAV	2	Osteopontin Signaling; Integrin-mediated Cell Adhesion; Arrhythmogenic Right Ventricular Cardiomyopathy; Primary Focal Segmental Glomerulosclerosis FSGS; Focal Adhesion; Osteoblast Signaling; MFAP5-mediated ovarian cancer cell motility and invasiveness; VEGFA-VEGFR2 Signaling Pathway; Focal Adhesion-PI3K-Akt-mTOR-signaling pathway	Regulation of actin cytoskeleton; Thyroid hormone signaling pathway; Small cell lung cancer; Arrhythmogenic right ventricular cardiomyopathy (ARVC); Phagosome; ECM-receptor interaction; Dilated cardiomyopathy; Focal adhesion; PI3K-Akt signaling pathway; Cell adhesion molecules (CAMs); Proteoglycans in cancer; Hypertrophic cardiomyopathy (HCM); Pathways in cancer	Integrin cell surface interactions; Signal transduction by L1; PECAM1 interactions; Cross-presentation of particulate exogenous antigens (phagosomes); VEGFA-VEGFR2 Pathway; Molecules associated with elastic fibres; Syndecan interactions; ECM proteoglycans; Laminin interactions; Neutrophil degranulation	48	26.937	100	100	100	2.22417e+08	4.76155e+07	2.05602e+08	1.70509e+06	63299	14.34	32.9	20.9	25.1	39.55	1.95089e+08	2.22417e+08	2.59546e+08	3.79052e+07	7.13428e+07	4.76155e+07	1.42675e+08	2.14675e+08	2.05602e+08
n/a	High	Master Protein	P48643	T-complex protein 1 subunit epsilon [OS=Homo sapiens]		0	29	16	80	16	541	59.6	5.66	51.06	metabolic process;regulation of biological process;response to stimulus;transport	cytoplasm;cytoskeleton;cytosol	nucleotide binding;protein binding;RNA binding	Pf00118	22948	ENSG00000150753.11	CCT5	5			BBSome-mediated cargo-targeting to cilium; Prefoldin mediated transfer of substrate to CCT/TriC; Cooperation of PDCL (PhLP1) and TRiC/CCT in G-protein beta folding; Association of TriC/CCT with target proteins during biosynthesis; Formation of tubulin folding intermediates by CCT/TriC; Folding of actin by CCT/TriC	13	10.31	100	100	100	1.76746e+08	2.58404e+07	1.17546e+08	856104	83032.6	19.52	32.38	24.64	19.89	51.62	1.43416e+08	2.12767e+08	1.76746e+08	1.88641e+07	3.62199e+07	2.58404e+07	7.69249e+07	1.17546e+08	1.26286e+08
n/a	High	Master Protein	P18621	60S ribosomal protein L17 [OS=Homo sapiens]		0	35	7	72	7	184	21.4	10.17	50.26	cell organization and biogenesis;metabolic process;transport	cytosol;nucleus;ribosome	protein binding;RNA binding;structural molecule activity	Pf00237	6139	ENSG00000215472.10; ENSG00000265681.7	RPL17	18	Cytoplasmic Ribosomal Proteins	Ribosome	Peptide chain elongation; Eukaryotic Translation Termination; Viral mRNA Translation; L13a-mediated translational silencing of Ceruloplasmin expression; Nonsense Mediated Decay (NMD) independent of the Exon Junction Complex (EJC); Selenocysteine synthesis; Nonsense Mediated Decay (NMD) enhanced by the Exon Junction Complex (EJC); GTP hydrolysis and joining of the 60S ribosomal subunit; Major path…	34	1.794	100	100	100	1.26659e+08	1.30262e+07	1.32342e+08	160625	89512.8	17.02	36.74	28.26	41.63	37.69	9.70395e+07	1.36179e+08	1.26659e+08	9.67346e+06	1.99074e+07	1.30262e+07	7.93346e+07	1.40341e+08	1.32342e+08
n/a	High	Master Protein	P22087	rRNA 2'-O-methyltransferase fibrillarin [OS=Homo sapiens]		0	38	9	88	9	321	33.8	10.18	92.59	cell differentiation;cell organization and biogenesis;metabolic process	chromosome;membrane;nucleus	catalytic activity;protein binding;RNA binding	Pf01135, Pf01269, Pf13847	2091	ENSG00000280548.3; ENSG00000105202.8	FBL	19; CHR_HG2021_PATCH		Ribosome biogenesis in eukaryotes	Major pathway of rRNA processing in the nucleolus and cytosol; rRNA modification in the nucleus and cytosol	6	12.94	100	100	100	1.06909e+08	3.5083e+07	1.23859e+08	169315	13084.7	12.37	14.1	19.54	50.71	145.61	1.06909e+08	9.10711e+07	1.16797e+08	3.62692e+07	2.76809e+07	3.5083e+07	9.05096e+07	1.33821e+08	1.23859e+08
n/a	High	Master Protein	P05388	60S acidic ribosomal protein P0 [OS=Homo sapiens]		0	33	7	78	7	317	34.3	5.97	86.19	cell organization and biogenesis;metabolic process;regulation of biological process;response to stimulus;transport	cytoplasm;cytosol;endoplasmic reticulum;membrane;nucleus;ribosome	protein binding;RNA binding;structural molecule activity	Pf00428, Pf00466	6175	ENSG00000089157.15	RPLP0	12	Cytoplasmic Ribosomal Proteins	Ribosome	Peptide chain elongation; Gene and protein expression by JAK-STAT signaling after Interleukin-12 stimulation; Eukaryotic Translation Termination; Viral mRNA Translation; L13a-mediated translational silencing of Ceruloplasmin expression; Nonsense Mediated Decay (NMD) independent of the Exon Junction Complex (EJC); Selenocysteine synthesis; Nonsense Mediated Decay (NMD) enhanced by the Exon Junctio…	39	3.073	100	100	100	1.9297e+08	1.11171e+08	2.13509e+08	32261.9	10499.2	11.26	25.17	16.99	45.28	129.54	1.67961e+08	2.10639e+08	1.9297e+08	1.09681e+08	1.66739e+08	1.11171e+08	1.57052e+08	2.13509e+08	2.15548e+08
n/a	High	Master Protein	O00567	Nucleolar protein 56 [OS=Homo sapiens]		0	22	12	78	12	594	66	9.19	67.53	metabolic process	cytoplasm;membrane;nucleus	protein binding;RNA binding	Pf01798, Pf08060, Pf08156	10528	ENSG00000101361.16	NOP56	20		Ribosome biogenesis in eukaryotes	Major pathway of rRNA processing in the nucleolus and cytosol; Association of TriC/CCT with target proteins during biosynthesis; rRNA modification in the nucleus and cytosol	10	2.444	100	100	100	1.2244e+08	4.94142e+07	1.02381e+08	121103	49549.2	20.59	30.09	28.24	11.12	70.32	8.91637e+07	1.35306e+08	1.2244e+08	3.69826e+07	6.77133e+07	4.94142e+07	6.15713e+07	1.02381e+08	1.0903e+08
n/a	High	Master Protein	P14866	Heterogeneous nuclear ribonucleoprotein L [OS=Homo sapiens]		0	20	11	111	10	589	64.1	8.22	87.5	metabolic process;regulation of biological process	cytoplasm;membrane;nucleus	DNA binding;protein binding;RNA binding	Pf00076, Pf13893, Pf14259	3191	ENSG00000282947.1; ENSG00000104824.16	HNRNPL	19; CHR_HG26_PATCH	mRNA Processing		mRNA Splicing - Major Pathway	5	16.15	100	100	100	2.0674e+08	3.85172e+07	1.68305e+08	196410	12161.7	20.14	30.97	26.96	17.7	60.1	1.42244e+08	2.07098e+08	2.0674e+08	2.23609e+07	4.25265e+07	3.85172e+07	1.00421e+08	1.68305e+08	1.6873e+08
n/a	High	Master Protein	P62266	40S ribosomal protein S23 [OS=Homo sapiens]		0	50	8	78	8	143	15.8	10.49	51.71	cell organization and biogenesis;metabolic process;transport	cytosol;membrane;ribosome	protein binding;RNA binding;structural molecule activity	Pf00164	6228	ENSG00000186468.12	RPS23	5	Cytoplasmic Ribosomal Proteins	Ribosome	Peptide chain elongation; Eukaryotic Translation Termination; Viral mRNA Translation; Formation of the ternary complex, and subsequently, the 43S complex; L13a-mediated translational silencing of Ceruloplasmin expression; Selenocysteine synthesis; Nonsense Mediated Decay (NMD) independent of the Exon Junction Complex (EJC); Nonsense Mediated Decay (NMD) enhanced by the Exon Junction Complex (EJC)…	38	67.287	100	100	100	3.51982e+08	5.97345e+07	3.29745e+08	314950	4680.67	10.77	3.05	17.16	24.45	146.66	3.095e+08	3.84365e+08	3.51982e+08	5.83392e+07	6.19623e+07	5.97345e+07	2.46319e+08	3.29745e+08	3.43558e+08
n/a	High	Master Protein	Q7Z794	Keratin, type II cytoskeletal 1b [OS=Homo sapiens]		0	29	22	137	16	578	61.9	5.99	158.65	cell death;cell organization and biogenesis	cytoskeleton;cytosol	structural molecule activity	Pf00038, Pf03962, Pf13166, Pf14817	374454	ENSG00000189182.9	KRT77	12			Formation of the cornified envelope	3	1.573	29.634	34.023	22.047	1.61496e+07	1.20152e+07	1.85414e+07	857494	544974	10.71	25.19	33.13	7.42	16.31	1.45082e+07	1.7979e+07	1.61496e+07	1.20152e+07	1.5388e+07	9.24455e+06	9.72326e+06	1.89569e+07	1.85414e+07
n/a	High	Master Protein	O60506	Heterogeneous nuclear ribonucleoprotein Q [OS=Homo sapiens]		0	16	10	50	6	623	69.6	8.59	30.25	cell differentiation;metabolic process;regulation of biological process;response to stimulus	cytoplasm;endoplasmic reticulum;membrane;nucleus;spliceosomal complex	protein binding;RNA binding	Pf00076, Pf13893, Pf14259	10492	ENSG00000135316.17	SYNCRIP	6				0	0.01	100	100	100	1.17715e+07	4.84711e+06	6.95836e+06		4307.82	13.29	31.64	36		97.14	1.03173e+07	1.34648e+07	1.17715e+07	3.54018e+06	6.70766e+06	4.84711e+06	3.56299e+06	6.95836e+06	7.62195e+06
n/a	High	Master Protein	P35637-1	RNA-binding protein FUS [OS=Homo sapiens]		0	13	6	44	5	526	53.4	9.36	54.72	metabolic process;regulation of biological process;response to stimulus	cytoplasm;nucleus	DNA binding;metal ion binding;protein binding;RNA binding	Pf00076, Pf00641, Pf13893, Pf14259	2521	ENSG00000089280.18	FUS	16	mRNA Processing	Transcriptional misregulation in cancer	mRNA Splicing - Major Pathway	6	2.749	100	100	100	4.51435e+07	3.21558e+07	5.93191e+07	23209.5	8444.1	17.72	38.71	22.69	127.33	16.1	3.51728e+07	5.03679e+07	4.51435e+07	1.78085e+07	4.11008e+07	3.21558e+07	4.19827e+07	6.67455e+07	5.93191e+07
n/a	High	Master Protein	P62081	40S ribosomal protein S7 [OS=Homo sapiens]		0	60	12	157	12	194	22.1	10.1	48.43	cell organization and biogenesis;metabolic process;regulation of biological process;transport	cytoplasm;cytoskeleton;cytosol;membrane;nucleus;ribosome	protein binding;RNA binding;structural molecule activity	Pf01251	6201	ENSG00000171863.12	RPS7	2	Cytoplasmic Ribosomal Proteins	Ribosome	Peptide chain elongation; Eukaryotic Translation Termination; Viral mRNA Translation; Formation of the ternary complex, and subsequently, the 43S complex; L13a-mediated translational silencing of Ceruloplasmin expression; Selenocysteine synthesis; Nonsense Mediated Decay (NMD) independent of the Exon Junction Complex (EJC); Nonsense Mediated Decay (NMD) enhanced by the Exon Junction Complex (EJC)…	39	0.115	100	100	100	1.01965e+09	7.14126e+08	1.28355e+09	238923	2.07292e+06	16.53	28.39	25.01	17.03	27.09	7.85306e+08	1.09001e+09	1.01965e+09	4.91258e+08	8.86076e+08	7.14126e+08	8.03153e+08	1.28355e+09	1.30043e+09
n/a	High	Master Protein	P49913	cathelicidin antimicrobial peptide [OS=Homo sapiens]		0	39	10	106	10	170	19.3	9.41	73.55	defense response;regulation of biological process;response to stimulus;transport	extracellular;organelle lumen	protein binding	Pf00666, Pf12153	820		CAMP	3	Sterol Regulatory Element-Binding Proteins (SREBP) signalling	NOD-like receptor signaling pathway; Tuberculosis; Salivary secretion	Antimicrobial peptides; Neutrophil degranulation	8	61.448	100	100	100	4.05167e+07	9.57626e+07	3.89712e+07	2.21954e+07	361209	25.68	9.49	16.45	13.01	42.08	4.05167e+07	2.4909e+07	4.07945e+07	1.01946e+08	8.4358e+07	9.57626e+07	3.89712e+07	4.77658e+07	3.4709e+07
n/a	High	Master Protein	Q08211	Atp-dependent rna helicase a [OS=Homo sapiens]		0	11	10	33	10	1270	140.9	6.84	23.39	cell death;cell differentiation;cell organization and biogenesis;defense response;metabolic process;regulation of biological process;response to stimulus;transport	cytoplasm;cytoskeleton;cytosol;membrane;nucleus;ribosome	catalytic activity;DNA binding;metal ion binding;nucleotide binding;protein binding;RNA binding	Pf00035, Pf00270, Pf00271, Pf04408, Pf07717	1660	ENSG00000135829.16	DHX9	1	mRNA Processing		TRAF6 mediated NF-kB activation; TAK1 activates NFkB by phosphorylation and activation of IKKs complex; RIP-mediated NFkB activation via ZBP1; Activated TLR4 signalling; Interleukin-1 family signaling; mRNA Splicing - Major Pathway; DEx/H-box helicases activate type I IFN and inflammatory cytokines production	34	4.117	100	100	100	6.78575e+07	2.01865e+07	6.67246e+07	65006.4	15788.9	9.7	12.75	19.38	108.97	102.41	7.17468e+07	6.78575e+07	5.91905e+07	1.73749e+07	2.24667e+07	2.01865e+07	4.68022e+07	6.73297e+07	6.67246e+07
n/a	High	Master Protein	P13797	Plastin-3 [OS=Homo sapiens]		0	32	16	72	12	630	70.8	5.6	94.98	cell organization and biogenesis	cytoplasm;cytosol;membrane	metal ion binding;protein binding	Pf00036, Pf00307, Pf13499	5358	ENSG00000102024.17	PLS3	X				0	3.218	100	100	100	9.8804e+07	4.41472e+07	1.46284e+08	25964.8	8069.28	20.59	28.62	33.43	7.84	102.45	6.81892e+07	9.8804e+07	1.01215e+08	3.53152e+07	6.1785e+07	4.41472e+07	7.87771e+07	1.46284e+08	1.57707e+08
n/a	High	Master Protein	P06748	Nucleophosmin [OS=Homo sapiens]		0	19	6	80	6	294	32.6	4.78	71.72	cell growth;cell organization and biogenesis;cellular homeostasis;metabolic process;regulation of biological process;response to stimulus;transport	cytoplasm;cytoskeleton;cytosol;membrane;nucleus	DNA binding;enzyme regulator activity;protein binding;RNA binding	Pf03066	4869	ENSG00000181163.13	NPM1	5			Nuclear import of Rev protein; TFAP2A acts as a transcriptional repressor during retinoic acid induced cell differentiation; TP53 regulates transcription of additional cell cycle genes whose exact role in the p53 pathway remain uncertain; Deposition of new CENPA-containing nucleosomes at the centromere	18	4.62	100	100	100	3.06734e+08	9.43085e+07	2.44056e+08	413414	89481.2	15	29.88	25.91	39.41	101.77	2.46811e+08	3.06734e+08	3.3338e+08	7.55982e+07	1.35005e+08	9.43085e+07	1.53232e+08	2.44056e+08	2.56868e+08
n/a	High	Master Protein	P69905	Hemoglobin subunit alpha [OS=Homo sapiens]		0	63	7	57	7	142	15.2	8.68	48.14	cell organization and biogenesis;metabolic process;regulation of biological process;response to stimulus;transport	cytosol;extracellular;membrane;organelle lumen	antioxidant activity;catalytic activity;metal ion binding;protein binding;transporter activity	Pf00042	3040; 3039	ENSG00000206172.8; ENSG00000188536.12	HBA2; HBA1	16	Selenium Micronutrient Network; Vitamin B12 Metabolism; Folate Metabolism; Effects of Nitric Oxide	African trypanosomiasis; Malaria	Scavenging of heme from plasma; Erythrocytes take up carbon dioxide and release oxygen; Erythrocytes take up oxygen and release carbon dioxide	13	0.775	3.198	36.346	15.526	1.30136e+06	6.31717e+06	1.47887e+07	315257	406886	10.13	32.59	43.96	28.88	27.94	1.21625e+06	1.30136e+06	1.48065e+06	4.37323e+06	8.55096e+06	6.31717e+06	7.39017e+06	1.95082e+07	1.47887e+07
n/a	High	Master Protein	O15143	Actin-related protein 2/3 complex subunit 1B [OS=Homo sapiens]		0	43	13	100	13	372	40.9	8.35	72.77	cell organization and biogenesis;cellular component movement;regulation of biological process;response to stimulus	cytoplasm;cytoskeleton;cytosol	protein binding;structural molecule activity	Pf00400	10095	ENSG00000130429.12	ARPC1B	7	Pathogenic Escherichia coli infection; Microglia Pathogen Phagocytosis Pathway	Endocytosis; Fc gamma R-mediated phagocytosis; Salmonella infection; Shigellosis; Regulation of actin cytoskeleton; Bacterial invasion of epithelial cells; Pathogenic Escherichia coli infection	Regulation of actin dynamics for phagocytic cup formation; EPHB-mediated forward signaling; RHO GTPases Activate WASPs and WAVEs	21	10.093	100	100	100	3.54582e+07	4.93535e+07	7.93022e+07	1.34703e+06	133466	9.02	14.72	20.95	35.25	69.24	3.54582e+07	3.26495e+07	3.90787e+07	4.0668e+07	5.47467e+07	4.93535e+07	5.64417e+07	7.93022e+07	8.59588e+07
n/a	High	Master Protein	Q96N67-5	Isoform 5 of Dedicator of cytokinesis protein 7 [OS=Homo sapiens]		0	8	16	101	15	2109	239.3	6.8	96.76	cell organization and biogenesis;regulation of biological process;response to stimulus		protein binding	Pf06920, Pf11878, Pf14429	85440	ENSG00000116641.17	DOCK7	1				0	4.903	100	100	100	3.78342e+07	2.40213e+07	4.98547e+07	853964	174168	11.04	28.76	31.81	33.33	61.84	3.555e+07	3.78342e+07	4.39021e+07	1.64358e+07	2.98857e+07	2.40213e+07	2.91939e+07	4.98547e+07	5.695e+07
n/a	High	Master Protein	Q03135	Caveolin-1 [OS=Homo sapiens]		0	36	6	74	6	178	20.5	6.02	61.69	cell communication;cell differentiation;cell organization and biogenesis;cellular component movement;cellular homeostasis;metabolic process;regulation of biological process;response to stimulus;transport	endoplasmic reticulum;endosome;Golgi;membrane	enzyme regulator activity;protein binding;structural molecule activity	Pf01146	857	ENSG00000105974.11	CAV1	7	Androgen receptor signaling pathway; Integrin-mediated Cell Adhesion; Focal Adhesion; TGF-beta Signaling Pathway; VEGFA-VEGFR2 Signaling Pathway; EGF/EGFR Signaling Pathway	Viral myocarditis; Focal adhesion; Bacterial invasion of epithelial cells; Endocytosis; Proteoglycans in cancer	Triglyceride catabolism; Basigin interactions; eNOS activation; NOSTRIN mediated eNOS trafficking; Disassembly of the destruction complex and recruitment of AXIN to the membrane; VEGFR2 mediated vascular permeability	30	100	100	100	100	7.95794e+07	5.04102e+07	5.12041e+07	3805.39		22.5	9.46	19.08			8.81141e+07	5.57741e+07	7.95794e+07	5.07431e+07	4.27263e+07	5.04102e+07	5.12041e+07	6.07577e+07	4.12719e+07
n/a	High	Master Protein	P11388-1	DNA topoisomerase 2-alpha [OS=Homo sapiens]		0	8	13	88	13	1531	174.3	8.72	62.47	cell differentiation;cell division;cell organization and biogenesis;metabolic process;regulation of biological process;response to stimulus	chromosome;cytoplasm;nucleus	catalytic activity;DNA binding;metal ion binding;nucleotide binding;protein binding;RNA binding	Pf00204, Pf00521, Pf01751, Pf02518, Pf08070	7153	ENSG00000131747.14	TOP2A	17	Gastric Cancer Network 1; Gastric cancer network 2; Retinoblastoma (RB) in Cancer	Platinum drug resistance	SUMOylation of DNA replication proteins; Transcription of E2F targets under negative control by DREAM complex	14	8.391	100	100	100	9.06071e+07	1.99027e+07	7.72708e+07	176611	21048.3	12.52	24.65	23.63	23.68	12.2	7.23762e+07	9.08245e+07	9.06071e+07	1.86457e+07	2.87963e+07	1.99027e+07	4.9549e+07	7.72708e+07	7.75929e+07
n/a	High	Master Protein	P62263	40S ribosomal protein S14 [OS=Homo sapiens]		0	40	6	82	6	151	16.3	10.05	66.28	cell differentiation;cell organization and biogenesis;metabolic process;regulation of biological process;transport	cytosol;membrane;mitochondrion;ribosome	protein binding;RNA binding;structural molecule activity;translation regulator activity	Pf00411	6208	ENSG00000164587.11	RPS14	5	Cytoplasmic Ribosomal Proteins	Ribosome	Peptide chain elongation; Eukaryotic Translation Termination; Viral mRNA Translation; Formation of the ternary complex, and subsequently, the 43S complex; L13a-mediated translational silencing of Ceruloplasmin expression; Selenocysteine synthesis; Nonsense Mediated Decay (NMD) independent of the Exon Junction Complex (EJC); Nonsense Mediated Decay (NMD) enhanced by the Exon Junction Complex (EJC)…	39	3.59	100	100	100	2.03183e+08	3.24947e+07	1.83165e+08	150891	42033.1	21.08	33.59	25.06	6.91	117.84	1.46285e+08	2.24198e+08	2.03183e+08	2.74683e+07	5.10669e+07	3.24947e+07	1.14581e+08	1.83165e+08	1.85862e+08
n/a	High	Master Protein	O15144	Actin-related protein 2/3 complex subunit 2 [OS=Homo sapiens]		0	40	11	62	11	300	34.3	7.36	20.41	cell organization and biogenesis;cellular component movement;regulation of biological process;response to stimulus	cytoplasm;cytoskeleton;cytosol;endosome;membrane	protein binding;structural molecule activity	Pf04045	10109	ENSG00000163466.15	ARPC2	2	Pathogenic Escherichia coli infection	Regulation of actin cytoskeleton; Endocytosis; Fc gamma R-mediated phagocytosis; Salmonella infection; Bacterial invasion of epithelial cells; Pathogenic Escherichia coli infection; Shigellosis	EPHB-mediated forward signaling; Clathrin-mediated endocytosis; RHO GTPases Activate WASPs and WAVEs; Regulation of actin dynamics for phagocytic cup formation	23	6.387	100	100	100	3.09981e+07	2.05381e+07	4.33386e+07	325776	51008	24.51	37.05	32.98	22.53	30.43	2.15752e+07	3.09981e+07	3.57542e+07	1.42877e+07	3.02348e+07	2.05381e+07	2.31875e+07	4.33386e+07	4.55397e+07
n/a	High	Master Protein	P14923	Junction plakoglobin [OS=Homo sapiens]		0	22	16	63	16	745	81.7	6.14	41.72	cell death;cell organization and biogenesis;cellular component movement;regulation of biological process;response to stimulus;transport	cytoplasm;cytoskeleton;cytosol;extracellular;membrane;nucleus;organelle lumen	protein binding;signal transducer activity;structural molecule activity	Pf00514	3728	ENSG00000173801.16	JUP	17	Arrhythmogenic Right Ventricular Cardiomyopathy; Corticotropin-releasing hormone signaling pathway; Ectoderm Differentiation	Acute myeloid leukemia; Transcriptional misregulation in cancer; Arrhythmogenic right ventricular cardiomyopathy (ARVC); Pathways in cancer	Adherens junctions interactions; Neutrophil degranulation; Formation of the cornified envelope; VEGFR2 mediated vascular permeability	22	0.856	18.131	5.74	7.232	8.60732e+06	3.43324e+06	2.72474e+06	406353	474719	26.76	29.3	62.78	8.45	60.21	5.2313e+06	8.60732e+06	8.85281e+06	3.43324e+06	2.33492e+06	4.29573e+06	1.44153e+06	2.72474e+06	5.34721e+06
n/a	High	Master Protein	P15170-2	Isoform 2 of Eukaryotic peptide chain release factor GTP-binding subunit ERF3A [OS=Homo sapiens]		0	18	13	108	13	636	68.6	5.33	82.91	cell organization and biogenesis;metabolic process	cytosol	catalytic activity;nucleotide binding;protein binding;RNA binding	Pf00009, Pf03143, Pf03144, Pf07145	2935	ENSG00000103342.12	GSPT1	16				0	3.653	100	100	100	2.02781e+08	9.27415e+07	1.48787e+08	230684	63152	10.28	24.29	20.94	9.66	138.02	1.76218e+08	2.02781e+08	2.16323e+08	8.31433e+07	1.30036e+08	9.27415e+07	1.01918e+08	1.52289e+08	1.48787e+08
n/a	High	Master Protein	Q9Y3I0	tRNA-splicing ligase RtcB homolog [OS=Homo sapiens]		0	14	8	115	8	505	55.2	7.23	98.11	metabolic process	cytoplasm;cytosol;membrane;nucleus	catalytic activity;metal ion binding;nucleotide binding;protein binding;RNA binding	Pf01139	51493	ENSG00000100220.11	C22orf28; RTCB	22			tRNA processing in the nucleus	3	0.159	100	100	100	8.92688e+07	2.40511e+07	8.1064e+07	4302.32	27064.5	16.09	32.69	20.68		31.53	7.00302e+07	9.6597e+07	8.92688e+07	1.8548e+07	3.51868e+07	2.40511e+07	5.90734e+07	8.1064e+07	8.98573e+07
n/a	High	Master Protein	P68871	Hemoglobin subunit beta [OS=Homo sapiens]		0	63	8	48	8	147	16	7.28	43.49	cell organization and biogenesis;coagulation;metabolic process;regulation of biological process;response to stimulus;transport	cytosol;extracellular;organelle lumen	antioxidant activity;catalytic activity;metal ion binding;protein binding;transporter activity	Pf00042	3043	ENSG00000244734.3	HBB	11	Selenium Micronutrient Network; Vitamin B12 Metabolism; Folate Metabolism	African trypanosomiasis; Malaria	Neutrophil degranulation; Scavenging of heme from plasma; Erythrocytes take up carbon dioxide and release oxygen; Erythrocytes take up oxygen and release carbon dioxide; Factors involved in megakaryocyte development and platelet production	17	1.684	25.056	52.142	69.394	6.69233e+06	1.8535e+07	1.3927e+07	449666	267098	18.84	26.51	43	8.1	56.06	5.03169e+06	6.69233e+06	7.35927e+06	1.23204e+07	2.13284e+07	1.8535e+07	6.59295e+06	1.3927e+07	1.71103e+07
n/a	High	Master Protein	P00338-1	L-lactate dehydrogenase A chain [OS=Homo sapiens]		0	34	12	139	11	332	36.7	8.27	135.44	metabolic process;regulation of biological process;response to stimulus	cytoplasm;cytosol;membrane;nucleus	catalytic activity;nucleotide binding;protein binding	Pf00056, Pf02866	3939	ENSG00000134333.13	LDHA	11	Cori Cycle; Photodynamic therapy-induced HIF-1 survival signaling; Amino Acid metabolism; Glycolysis and Gluconeogenesis	Metabolic pathways; Pyruvate metabolism; Propanoate metabolism; Glycolysis / Gluconeogenesis; Central carbon metabolism in cancer; Cysteine and methionine metabolism; Glucagon signaling pathway; HIF-1 signaling pathway	Pyruvate metabolism	16	6.972	100	100	100	1.46353e+08	5.88916e+07	1.26208e+08	2.35283e+06	337456	17.42	25.62	27.71	20.65	119.27	1.12811e+08	1.60144e+08	1.46353e+08	5.2108e+07	8.36877e+07	5.88916e+07	7.414e+07	1.26698e+08	1.26208e+08
n/a	High	Master Protein	O43852-4	Isoform 4 of Calumenin [OS=Homo sapiens]		0	35	11	93	4	323	38.1	4.58	73.17	metabolic process	endoplasmic reticulum;extracellular;Golgi;membrane;organelle lumen	metal ion binding;protein binding	Pf13499	813	ENSG00000128595.16	CALU	7	NOTCH1 regulation of human endothelial cell calcification			1	2.821	100	100	100	6.18194e+07	3.18832e+07	1.04305e+08	23171.9	8215.01	5.62	7.38	14.47	87.66	62.16	6.18194e+07	5.78262e+07	6.47034e+07	3.18832e+07	3.60519e+07	3.17363e+07	8.72839e+07	1.04305e+08	1.16942e+08
n/a	High	Master Protein	P12259	Coagulation factor V [OS=Homo sapiens]		0	5	12	74	12	2224	251.5	6.05	51.06	cell organization and biogenesis;coagulation;metabolic process;response to stimulus;transport	endoplasmic reticulum;extracellular;Golgi;membrane;organelle lumen	metal ion binding;protein binding	Pf00754, Pf07732	2153	ENSG00000198734.10	F5	1	Blood Clotting Cascade; Complement and Coagulation Cascades	Complement and coagulation cascades	Platelet degranulation ; Post-translational protein phosphorylation; Regulation of Insulin-like Growth Factor (IGF) transport and uptake by Insulin-like Growth Factor Binding Proteins (IGFBPs); Common Pathway of Fibrin Clot Formation; Cargo concentration in the ER; COPII (Coat Protein 2) Mediated Vesicle Transport	20	52.304	100	100	100	9.35874e+07	2.55745e+07	9.43908e+07	695379	13295	7.99	33.88	13.13	14.92	52.12	9.35874e+07	1.0088e+08	8.59499e+07	2.35566e+07	4.2383e+07	2.55745e+07	9.66673e+07	9.43908e+07	7.54212e+07
n/a	High	Master Protein	Q92945	Far upstream element-binding protein 2 [OS=Homo sapiens]		0	17	10	97	10	711	73.1	7.3	83.79	metabolic process;regulation of biological process;response to stimulus;transport	cytoplasm;cytosol;membrane;nucleus	DNA binding;protein binding;RNA binding	Pf00013, Pf07650, Pf09005, Pf13014	8570	ENSG00000088247.17	KHSRP	19	Preimplantation Embryo		ATF4 activates genes; KSRP (KHSRP) binds and destabilizes mRNA	8	2.053	100	100	100	1.33616e+08	4.45188e+07	1.85262e+08	133465	65005	19.08	28.61	28.16	53	129.4	1.01562e+08	1.49634e+08	1.33616e+08	3.61811e+07	6.29533e+07	4.45188e+07	1.11294e+08	1.96475e+08	1.85262e+08
n/a	High	Master Protein	O00410	Importin-5 [OS=Homo sapiens]		0	9	10	70	10	1097	123.6	4.94	46.87	regulation of biological process;response to stimulus;transport	cytoplasm;membrane;nucleus	enzyme regulator activity;protein binding;RNA binding;transporter activity	Pf02985, Pf12755, Pf13513, Pf13646	3843	ENSG00000065150.18	IPO5	13			vRNP Assembly	6	2.188	100	100	100	1.81192e+08	3.95176e+07	9.31018e+07	73756.4	33714.9	10.48	12.26	18.96	68.58	86.51	1.5968e+08	1.97138e+08	1.81192e+08	3.91886e+07	4.83427e+07	3.95176e+07	6.89442e+07	9.31018e+07	1.0078e+08
n/a	High	Master Protein	O60264	SWI/SNF-related matrix-associated actin-dependent regulator of chromatin subfamily A member 5 [OS=Homo sapiens]		0	12	13	94	13	1052	121.8	8.09	59.57	cell organization and biogenesis;metabolic process;regulation of biological process	chromosome;nucleus	catalytic activity;DNA binding;nucleotide binding;protein binding	Pf00176, Pf00270, Pf00271, Pf04851, Pf09110, Pf09111, Pf11496	8467	ENSG00000153147.5	SMARCA5	4			Recruitment and ATM-mediated phosphorylation of repair and signaling proteins at DNA double strand breaks; NoRC negatively regulates rRNA expression; B-WICH complex positively regulates rRNA expression; Deposition of new CENPA-containing nucleosomes at the centromere	14	12.249	100	100	100	8.68372e+07	1.79703e+08	7.70486e+07	613987	50125.5	33.02	9.15	17.24	19.9	104.05	6.60179e+07	1.26541e+08	8.68372e+07	1.79703e+08	1.87839e+08	1.56975e+08	5.67362e+07	7.70486e+07	7.86144e+07
n/a	High	Master Protein	P67936	Tropomyosin alpha-4 chain [OS=Homo sapiens]		0	56	21	131	10	248	28.5	4.69	136.5	cell differentiation;cell organization and biogenesis;cellular component movement	cytoplasm;cytoskeleton;cytosol;membrane	metal ion binding;protein binding;structural molecule activity	Pf00261, Pf12718	7171	ENSG00000167460.14	TPM4	19	Striated Muscle Contraction	Hypertrophic cardiomyopathy (HCM); Dilated cardiomyopathy; Adrenergic signaling in cardiomyocytes; Cardiac muscle contraction	Smooth Muscle Contraction; Striated Muscle Contraction	8	5.489	100	100	100	2.23719e+08	1.57917e+08	3.14705e+08	340074	61950.2	5.8	38.65	18.77	38.69	79.95	2.11885e+08	2.37877e+08	2.23719e+08	1.21932e+08	2.55192e+08	1.57917e+08	2.257e+08	3.14705e+08	3.23342e+08
n/a	High	Master Protein	P22061-2	Isoform 2 of Protein-L-isoaspartate(D-aspartate) O-methyltransferase [OS=Homo sapiens]		0	28	7	33	7	228	24.7	6.52	35.35	metabolic process	cytoplasm;cytosol	catalytic activity;protein binding	Pf01135, Pf01209, Pf05175, Pf06325, Pf08241, Pf12847, Pf13489, Pf13659, Pf13847	5110		PCMT1	6				0	12.938	100	100	100	8.25876e+06	2.64295e+07	7.81481e+06	185515	14338.3	34.91	21.69	4.15	18.6	55.42	4.53976e+06	9.54745e+06	8.25876e+06	2.18539e+07	3.35967e+07	2.64295e+07	8.00352e+06	7.81481e+06	7.37748e+06
n/a	High	Master Protein	P02765	Alpha-2-HS-glycoprotein [OS=Homo sapiens]		0	21	8	103	8	367	39.3	5.72	97.71	defense response;metabolic process;regulation of biological process;response to stimulus;transport	extracellular;Golgi;organelle lumen	enzyme regulator activity	Pf00031	197		AHSG	3			Platelet degranulation ; Post-translational protein phosphorylation; Regulation of Insulin-like Growth Factor (IGF) transport and uptake by Insulin-like Growth Factor Binding Proteins (IGFBPs); Neutrophil degranulation	11	28.147	100	100	100	1.25396e+08	2.84162e+08	2.97926e+08	5.89338e+06	209382	9.24	20.83	15.06	14.94	66.41	1.45462e+08	1.23579e+08	1.25396e+08	2.89778e+08	1.94669e+08	2.84162e+08	2.97926e+08	3.47216e+08	2.56786e+08
n/a	High	Master Protein	P31946	14-3-3 protein beta/alpha [OS=Homo sapiens]		0	34	7	97	4	246	28.1	4.83	88.75	cell organization and biogenesis;metabolic process;regulation of biological process;response to stimulus;transport	cytoplasm;cytosol;membrane;mitochondrion;nucleus	protein binding	Pf00244	7529	ENSG00000166913.12	YWHAB	20	Cell Cycle; IL-3 Signaling Pathway; Myometrial Relaxation and Contraction Pathways; Calcium Regulation in the Cardiac Cell; Sudden Infant Death Syndrome (SIDS) Susceptibility Pathways	Oocyte meiosis; Hepatitis B; PI3K-Akt signaling pathway; Hippo signaling pathway; Viral carcinogenesis; Cell cycle; Epstein-Barr virus infection	MAP2K and MAPK activation; mTORC1-mediated signalling; Negative regulation of MAPK pathway; ARMS-mediated activation; Tristetraprolin (TTP, ZFP36) binds and destabilizes mRNA; Translocation of GLUT4 to the plasma membrane; Rap1 signalling; Paradoxical activation of RAF signaling by kinase inactive BRAF; Frs2-mediated activation; Butyrate Response Factor 1 (BRF1) binds and destabilizes mRNA; Inter…	68	2.497	34.239	24.235	15.886	4.03998e+07	1.87438e+07	2.85957e+07	2.94621e+06	1.17992e+06	15.91	43.73	16.5	37.8	28.98	4.03998e+07	5.17593e+07	3.91112e+07	1.62686e+07	3.50725e+07	1.87438e+07	2.15676e+07	2.96397e+07	2.85957e+07
n/a	High	Master Protein	Q99623	Prohibitin-2 [OS=Homo sapiens]		0	30	9	128	9	299	33.3	9.83	75.58	cell organization and biogenesis;metabolic process;regulation of biological process;response to stimulus;transport	cell surface;cytoplasm;membrane;mitochondrion;nucleus	protein binding	Pf01145	11331	ENSG00000215021.8	PHB2	12			Processing of SMDT1	3	12.144	100	100	100	6.47736e+08	6.91075e+08	6.53057e+08	740012	60934.5	21.1	31.37	22.35	75.35	83.27	4.41035e+08	6.5983e+08	6.47736e+08	5.30436e+08	9.85502e+08	6.91075e+08	4.42637e+08	6.53057e+08	6.88615e+08
n/a	High	Master Protein	P02671-1	Fibrinogen alpha chain [OS=Homo sapiens]		0	13	11	55	11	866	94.9	6.01	71.61	cell organization and biogenesis;coagulation;defense response;metabolic process;regulation of biological process;response to stimulus;transport	cell surface;extracellular;membrane;organelle lumen	metal ion binding;protein binding;structural molecule activity	Pf00147, Pf02414, Pf08702, Pf12160	2243	ENSG00000171560.14	FGA	4	Blood Clotting Cascade; VEGFA-VEGFR2 Signaling Pathway	Platelet activation; Complement and coagulation cascades	Post-translational protein phosphorylation; Integrin cell surface interactions; Regulation of Insulin-like Growth Factor (IGF) transport and uptake by Insulin-like Growth Factor Binding Proteins (IGFBPs); Signaling by BRAF and RAF fusions; Amyloid fiber formation; MAP2K and MAPK activation; GRB2:SOS provides linkage to MAPK signaling for Integrins ; Signaling by RAS mutants; Signaling by high-kin…	42	0.923	100	100	100	5.99261e+07	2.22728e+07	9.96375e+07	125707	136230	6.44	42.63	47.67	19.88	41.07	5.38827e+07	6.07363e+07	5.99261e+07	1.28859e+07	3.19618e+07	2.22728e+07	3.54448e+07	1.01359e+08	9.96375e+07
n/a	High	Master Protein	Q14103	heterogeneous nuclear ribonucleoprotein D0 [OS=Homo sapiens]		0	23	7	44	5	355	38.4	7.81	77.15	metabolic process;regulation of biological process;response to stimulus	cytoplasm;cytosol;nucleus	DNA binding;protein binding;RNA binding	Pf00076, Pf13893, Pf14259	3184	ENSG00000138668.18	HNRNPD	4	mRNA Processing		mRNA Splicing - Major Pathway	5	0.803	100	100	100	7.94487e+07	1.98359e+07	8.55816e+07	77784.3	96827.8	10.16	15.3	22.17	29.01	29.7	7.02488e+07	7.94487e+07	8.61602e+07	1.6349e+07	2.22837e+07	1.98359e+07	5.83139e+07	8.55816e+07	9.04428e+07
n/a	High	Master Protein	P05386	60S acidic ribosomal protein P1 [OS=Homo sapiens]		0	75	3	45	3	114	11.5	4.32	80.18	cell organization and biogenesis;metabolic process;regulation of biological process;transport	cytosol;ribosome	enzyme regulator activity;protein binding;structural molecule activity	Pf00428	6176	ENSG00000137818.11	RPLP1	15	Cytoplasmic Ribosomal Proteins	Ribosome	Peptide chain elongation; Eukaryotic Translation Termination; Viral mRNA Translation; L13a-mediated translational silencing of Ceruloplasmin expression; Nonsense Mediated Decay (NMD) independent of the Exon Junction Complex (EJC); Selenocysteine synthesis; Nonsense Mediated Decay (NMD) enhanced by the Exon Junction Complex (EJC); GTP hydrolysis and joining of the 60S ribosomal subunit; Major path…	34		100	100	100	2.84364e+06	193744	3.16229e+06			70.49	11.54	24.04			2.84364e+06	3.81771e+06	528756	176412	221513	193744	2.1372e+06	3.16229e+06	3.48595e+06
n/a	High	Master Protein	P38159-1	RNA-binding motif protein, X chromosome [OS=Homo sapiens]		0	24	10	95	10	391	42.3	10.05	53.73	cell differentiation;cell organization and biogenesis;metabolic process;regulation of biological process;response to stimulus	membrane;nucleus;spliceosomal complex	DNA binding;protein binding;RNA binding	Pf00076, Pf08081, Pf13893, Pf14259	27316	ENSG00000147274.14	RBMX	X	mRNA Processing	Spliceosome	mRNA Splicing - Major Pathway	6	10.22	100	100	100	1.35362e+08	3.69268e+07	1.38897e+08	151631	14836.8	16.95	18.31	10.09	17.3	79.84	1.35362e+08	1.06528e+08	1.50053e+08	3.69268e+07	2.65672e+07	3.75452e+07	1.25697e+08	1.53825e+08	1.38897e+08
n/a	High	Master Protein	Q14847-2	Isoform 2 of LIM and SH3 domain protein 1 [OS=Homo sapiens]		0	25	9	94	9	323	36	8.62	81.05	regulation of biological process;transport	cytoplasm;cytoskeleton	metal ion binding;protein binding;transporter activity	Pf00412, Pf00880	3927		LASP1	17				0	1.339	100	100	50.042	7.76791e+07	2.64321e+07	8.07951e+07	707238	528195	18.88	29.54	27.19	6.08	3.9	5.90081e+07	8.65312e+07	7.76791e+07	2.04822e+07	3.67655e+07	2.64321e+07	5.18323e+07	8.07951e+07	9.08469e+07
n/a	High	Master Protein	Q9P2E9-1	Ribosome-binding protein 1 [OS=Homo sapiens]		0	6	9	72	8	1410	152.4	8.6	75.24	cell differentiation;metabolic process;regulation of biological process;transport	endoplasmic reticulum;membrane;ribosome	receptor activity;RNA binding	Pf03276, Pf04156, Pf05104, Pf09606, Pf12128, Pf13779	6238		RRBP1	20	Ectoderm Differentiation	Protein processing in endoplasmic reticulum		2	0.4	100	100	99.014	6.58269e+07	6.06433e+06	1.0988e+08	24499.1	61246.9	52.15	32.13	26.43	59.28	21.34	4.528e+07	1.24105e+08	6.58269e+07	5.23045e+06	9.42199e+06	6.06433e+06	7.24221e+07	1.0988e+08	1.2501e+08
n/a	High	Master Protein	O75643-1	U5 small nuclear ribonucleoprotein 200 kDa helicase [OS=Homo sapiens]		0	10	23	91	23	2136	244.4	6.06	56.96	cell differentiation;cell organization and biogenesis;metabolic process	membrane;nucleus;spliceosomal complex	catalytic activity;DNA binding;nucleotide binding;protein binding;RNA binding	Pf00270, Pf00271, Pf02889, Pf04851	23020	ENSG00000144028.14	SNRNP200	2		Spliceosome	mRNA Splicing - Major Pathway; mRNA Splicing - Minor Pathway	6	1.062	100	100	100	7.32287e+07	7.01204e+07	9.02367e+07	85927.2	80911.6	13.27	9.38	26.06	7.43	103.26	7.32287e+07	6.79824e+07	8.75344e+07	6.93659e+07	8.17086e+07	7.01204e+07	6.28695e+07	9.02367e+07	1.07846e+08
n/a	High	Master Protein	P62826	GTP-binding nuclear protein RAN [OS=Homo sapiens]		0	43	12	125	12	216	24.4	7.49	53.66	cell division;cell organization and biogenesis;metabolic process;regulation of biological process;response to stimulus;transport	chromosome;cytoplasm;cytosol;endosome;membrane;nucleus	catalytic activity;metal ion binding;nucleotide binding;protein binding;RNA binding;transporter activity	Pf00025, Pf00071, Pf08477	5901	ENSG00000132341.11	RAN	12	Androgen receptor signaling pathway; miRNA Biogenesis	Ribosome biogenesis in eukaryotes; HTLV-I infection; Epstein-Barr virus infection; RNA transport	MicroRNA (miRNA) biogenesis; Rev-mediated nuclear export of HIV RNA; Nuclear import of Rev protein; Regulation of cholesterol biosynthesis by SREBP (SREBF); NEP/NS2 Interacts with the Cellular Export Machinery; tRNA processing in the nucleus; Transcriptional regulation by small RNAs	30	8.825	100	100	100	2.31863e+08	7.53675e+07	1.72768e+08	749827	84969.2	20.16	29.72	22.71	8.49	104.8	1.60126e+08	2.34112e+08	2.31863e+08	5.83217e+07	1.05052e+08	7.53675e+07	1.16078e+08	1.72768e+08	1.81805e+08
n/a	High	Master Protein	Q07955-1	Serine/arginine-rich splicing factor 1 [OS=Homo sapiens]		0	42	10	86	10	248	27.7	10.36	51.11	cell differentiation;cell organization and biogenesis;metabolic process;regulation of biological process;transport	cytoplasm;nucleus;spliceosomal complex	protein binding;RNA binding	Pf00076, Pf13893, Pf14259	6426	ENSG00000136450.12	SRSF1	17	mRNA Processing	Herpes simplex infection; Spliceosome	Cleavage of Growing Transcript in the Termination Region ; Transport of Mature mRNA derived from an Intron-Containing Transcript; mRNA 3'-end processing; mRNA Splicing - Major Pathway; mRNA Splicing - Minor Pathway	15	37.355	100	100	100	4.90559e+07	3.1864e+07	5.55017e+07	806288	21584.7	12.56	22.84	19.36	14.98	63.16	3.96305e+07	5.02475e+07	4.90559e+07	2.46638e+07	3.92504e+07	3.1864e+07	4.27069e+07	5.55017e+07	6.33689e+07
n/a	High	Master Protein	P26599	Polypyrimidine tract-binding protein 1 [OS=Homo sapiens]		0	22	6	20	5	531	57.2	9.17	21.27	metabolic process;regulation of biological process;response to stimulus	membrane;nucleus	protein binding;RNA binding	Pf00076, Pf13893, Pf14259	5725	ENSG00000011304.19	PTBP1	19	mir-124 predicted interactions with cell cycle and differentiation; mRNA Processing		mRNA Splicing - Major Pathway; FGFR2 alternative splicing	11	1.665	100	100	100	4.85236e+07	1.04339e+07	3.70353e+07	59812.8	35916.6	17.43	38.33	21.16	31.73		3.81674e+07	5.43479e+07	4.85236e+07	1.04339e+07	1.78415e+07	8.96493e+06	2.86869e+07	3.70353e+07	4.41704e+07
n/a	High	Master Protein	P68371	Tubulin beta-4B chain [OS=Homo sapiens]		0	62	22	207	4	445	49.8	4.89	406.72	cell organization and biogenesis;cellular component movement;defense response;regulation of biological process;response to stimulus;transport	cytoplasm;cytoskeleton;cytosol;extracellular;nucleus;organelle lumen	catalytic activity;nucleotide binding;protein binding;RNA binding;structural molecule activity	Pf00091, Pf03953, Pf10644	10383	ENSG00000188229.5	TUBB4B	9	Pathogenic Escherichia coli infection; Parkin-Ubiquitin Proteasomal System pathway	Pathogenic Escherichia coli infection; Phagosome; Gap junction	COPI-independent Golgi-to-ER retrograde traffic; COPI-dependent Golgi-to-ER retrograde traffic; Carboxyterminal post-translational modifications of tubulin; Regulation of PLK1 Activity at G2/M Transition; Recruitment of NuMA to mitotic centrosomes; Hedgehog 'off' state; Loss of Nlp from mitotic centrosomes; Translocation of GLUT4 to the plasma membrane; Prefoldin mediated transfer of substrate to…	74	1.303	100	100	100	5.39407e+07	2.31514e+07	5.75727e+07	39629.7	30406.8	21.65	32.11	35.02	49.2	112.08	3.79033e+07	5.39407e+07	5.8596e+07	1.59047e+07	3.08743e+07	2.31514e+07	3.0412e+07	5.75727e+07	6.36561e+07
n/a	High	Master Protein	Q9UHD8-1	Septin-9 [OS=Homo sapiens]		0	20	10	83	10	586	65.4	8.97	53.24	cell division;cell organization and biogenesis;regulation of biological process	cytoplasm;cytoskeleton	catalytic activity;nucleotide binding;protein binding	Pf00735, Pf01926, Pf03193, Pf04548	10801	ENSG00000184640.17	SEPT9	17		Bacterial invasion of epithelial cells		1	29.421	100	100	100	1.05806e+08	3.1771e+07	9.4755e+07	220688	7501.03	17.26	31.11	24.54	28.46	20.93	8.23563e+07	1.16671e+08	1.05806e+08	2.63555e+07	4.74364e+07	3.1771e+07	6.62637e+07	9.4755e+07	1.09921e+08
n/a	High	Master Protein	P27348	14-3-3 protein theta [OS=Homo sapiens]		0	34	7	42	4	245	27.7	4.78	43.92	cell organization and biogenesis;regulation of biological process;response to stimulus;transport	cytoplasm;cytosol;membrane;mitochondrion	protein binding	Pf00244	10971	ENSG00000134308.13	YWHAQ	2	Cell Cycle; Pathogenic Escherichia coli infection; Primary Focal Segmental Glomerulosclerosis FSGS; IL-3 Signaling Pathway; Myometrial Relaxation and Contraction Pathways; Calcium Regulation in the Cardiac Cell; Sudden Infant Death Syndrome (SIDS) Susceptibility Pathways	Cell cycle; Hepatitis B; Hippo signaling pathway; Viral carcinogenesis; PI3K-Akt signaling pathway; Oocyte meiosis; Epstein-Barr virus infection; Pathogenic Escherichia coli infection	Translocation of GLUT4 to the plasma membrane; Chk1/Chk2(Cds1) mediated inactivation of Cyclin B:Cdk1 complex; TP53 Regulates Metabolic Genes; Activation of BAD and translocation to mitochondria ; RHO GTPases activate PKNs	37	3.091	100	100	100	2.83952e+07	4.57557e+06	2.39053e+07	136569	44184.4	23.79	25.81	29.82	57.16	87.6	2.04361e+07	3.33573e+07	2.83952e+07	3.97677e+06	6.45111e+06	4.57557e+06	1.45794e+07	2.39053e+07	2.71434e+07
n/a	High	Master Protein	Q14697-1	Neutral alpha-glucosidase AB [OS=Homo sapiens]		0	19	16	62	16	944	106.8	6.14	45.32	metabolic process	endoplasmic reticulum;Golgi;membrane;organelle lumen	catalytic activity;RNA binding	Pf01055, Pf13802	23193	ENSG00000089597.16	GANAB	11		N-Glycan biosynthesis; Metabolic pathways; Protein processing in endoplasmic reticulum	Calnexin/calreticulin cycle	8	9.675	100	100	35.546	1.76971e+07	5.011e+06	2.72856e+07	1.36386e+06	140972	20.99	37.87	20.58	21	78.79	1.37931e+07	1.76971e+07	2.11548e+07	2.7413e+06	6.2132e+06	5.011e+06	1.91385e+07	2.72856e+07	2.8674e+07
n/a	High	Master Protein	P53621-1	coatomer subunit alpha [OS=Homo sapiens]		0	16	21	146	21	1224	138.3	7.66	84.49	regulation of biological process;transport	cytoplasm;cytosol;extracellular;Golgi;membrane	protein binding;structural molecule activity	Pf00400, Pf04053, Pf06957	1314	ENSG00000122218.14	COPA	1			COPI-dependent Golgi-to-ER retrograde traffic; COPI-mediated anterograde transport	11	1.513	100	100	100	1.29453e+08	4.65343e+07	1.00057e+08	59592.1	39396.6	15.15	12.17	21.64	43.87	71.88	9.979e+07	1.33189e+08	1.29453e+08	3.94306e+07	5.03238e+07	4.65343e+07	7.00212e+07	1.00057e+08	1.08073e+08
n/a	High	Master Protein	P16070	CD44 antigen [OS=Homo sapiens]		0	9	6	53	6	742	81.5	5.33	39.8	cell organization and biogenesis;cellular component movement;metabolic process;regulation of biological process;response to stimulus;transport	cell surface;cytosol;Golgi;membrane	protein binding;receptor activity;signal transducer activity	Pf00193	960	ENSG00000026508.17	CD44	11	Hepatitis C and Hepatocellular Carcinoma; Wnt Signaling Pathway and Pluripotency; Senescence and Autophagy in Cancer	Proteoglycans in cancer; Shigellosis; MicroRNAs in cancer; ECM-receptor interaction; Epstein-Barr virus infection; Hematopoietic cell lineage	Integrin cell surface interactions; Degradation of the extracellular matrix; Neutrophil degranulation; Hyaluronan uptake and degradation; Interferon gamma signaling; Cell surface interactions at the vascular wall	25	98.393	100	100	100	4.71823e+07	1.1507e+07	2.92476e+07	1.52523e+06	15501.4	20.39	32.92	29.1	42.2	33.67	3.38786e+07	5.09608e+07	4.71823e+07	7.8393e+06	1.54811e+07	1.1507e+07	1.71808e+07	3.09444e+07	2.92476e+07
n/a	High	Master Protein	Q92616	eIF-2-alpha kinase activator GCN1 [OS=Homo sapiens]		0	7	20	73	20	2671	292.6	7.47	29.08	cell communication;metabolic process;regulation of biological process;response to stimulus	cytoplasm;cytosol;membrane;ribosome	enzyme regulator activity;protein binding;RNA binding	Pf12074, Pf13646	10985		GCN1L1; GCN1	12				0	25.087	100	100	100	7.22353e+07	2.29696e+07	6.44035e+07	745634	29721.7	18.11	18.8	27.31	13.6	104.95	7.02802e+07	9.61615e+07	7.22353e+07	2.29696e+07	3.13286e+07	2.29226e+07	3.83966e+07	6.44035e+07	6.53966e+07
n/a	High	Master Protein	Q9Y6M1-1	Isoform 2 of Insulin-like growth factor 2 mRNA-binding protein 2 [OS=Homo sapiens]		0	27	13	64	13	556	61.8	8.25	21.85	regulation of biological process;transport	cytoplasm;cytoskeleton;cytosol;nucleus	protein binding;RNA binding;translation regulator activity	Pf00013, Pf00076, Pf13014, Pf13893, Pf14259	10644	ENSG00000073792.15	IGF2BP2	3				0	9.801	100	100	100	1.34635e+08	4.59287e+07	1.417e+08	576090	58777	19.24	27.9	19.17	38.97	27.72	1.03572e+08	1.53263e+08	1.34635e+08	3.72446e+07	6.40858e+07	4.59287e+07	1.04385e+08	1.53163e+08	1.417e+08
n/a	High	Master Protein	Q6P2Q9	Pre-mRNA-processing-splicing factor 8 [OS=Homo sapiens]		0	9	24	134	24	2335	273.4	8.84	66.08	cell organization and biogenesis;metabolic process;response to stimulus	membrane;nucleus;spliceosomal complex	catalytic activity;protein binding;RNA binding	Pf01398, Pf08082, Pf08083, Pf08084, Pf10596, Pf10597, Pf10598, Pf12134	10594	ENSG00000174231.16; ENSG00000274442.2	PRPF8	17; CHR_HSCHR17_1_CTG2	mRNA Processing	Spliceosome	mRNA Splicing - Major Pathway; mRNA Splicing - Minor Pathway	7	4.656	96.984	62.67	31.819	2.27524e+08	7.46477e+07	1.47022e+08	1.09219e+07	2.34598e+06	16.08	30.76	28.78	9.65	18.05	1.71078e+08	2.31425e+08	2.27524e+08	6.46542e+07	1.13751e+08	7.46477e+07	8.82573e+07	1.47022e+08	1.5888e+08
n/a	High	Master Protein	P29317	Ephrin type-A receptor 2 [OS=Homo sapiens]		0	9	9	55	9	976	108.2	6.23	33.05	cell death;cell differentiation;cell organization and biogenesis;cell proliferation;cellular component movement;defense response;development;metabolic process;regulation of biological process;response to stimulus	cell surface;membrane	catalytic activity;nucleotide binding;protein binding;receptor activity;signal transducer activity	Pf00041, Pf00069, Pf00536, Pf01404, Pf07647, Pf07699, Pf07714, Pf09294, Pf14575	1969	ENSG00000142627.12	EPHA2	1	NRF2 pathway; Focal Adhesion-PI3K-Akt-mTOR-signaling pathway	PI3K-Akt signaling pathway; Rap1 signaling pathway; Axon guidance; Ras signaling pathway	EPH-ephrin mediated repulsion of cells; EPHA-mediated growth cone collapse	11	1.735	100	100	100	6.34759e+07	9.21466e+06	3.54686e+07	57049.9	32890.5	26.09	20.35	26.83	38.16	94.64	4.2778e+07	7.3397e+07	6.34759e+07	9.20309e+06	1.28866e+07	9.21466e+06	2.45429e+07	3.54686e+07	4.28188e+07
n/a	High	Master Protein	P02679	Fibrinogen gamma chain [OS=Homo sapiens]		0	22	8	37	8	453	51.5	5.62	36.28	cell organization and biogenesis;coagulation;metabolic process;regulation of biological process;response to stimulus;transport	cell surface;cytoplasm;extracellular;membrane;organelle lumen	catalytic activity;metal ion binding;protein binding;structural molecule activity	Pf00147, Pf08317, Pf08702, Pf15397	2266	ENSG00000171557.16	FGG	4	Blood Clotting Cascade; VEGFA-VEGFR2 Signaling Pathway	Platelet activation; Complement and coagulation cascades; Staphylococcus aureus infection	Post-translational protein phosphorylation; Integrin cell surface interactions; Regulation of Insulin-like Growth Factor (IGF) transport and uptake by Insulin-like Growth Factor Binding Proteins (IGFBPs); Signaling by BRAF and RAF fusions; MAP2K and MAPK activation; GRB2:SOS provides linkage to MAPK signaling for Integrins ; Signaling by RAS mutants; Signaling by high-kinase activity BRAF mutants…	42	2.686	95.572	83.732	0.622	1.39406e+07	90698.5	1.22136e+07	391830	145865	16.19	42.52	21.25	26.55	47.66	1.19501e+07	1.65148e+07	1.39406e+07		123696	66503.5	8.25794e+06	1.23535e+07	1.22136e+07
n/a	High	Master Protein	P30086	phosphatidylethanolamine-binding protein 1 [OS=Homo sapiens]		0	34	5	37	5	187	21	7.53	17.53	metabolic process;regulation of biological process;response to stimulus	cytoplasm;cytosol;nucleus	enzyme regulator activity;nucleotide binding;protein binding;RNA binding	Pf01161	5037	ENSG00000089220.4	PEBP1	12	EGF/EGFR Signaling Pathway		Paradoxical activation of RAF signaling by kinase inactive BRAF; Signaling by BRAF and RAF fusions; MAP2K and MAPK activation; Negative regulation of MAPK pathway; Signaling by RAS mutants; Signaling by high-kinase activity BRAF mutants; Signaling by moderate kinase activity BRAF mutants; Interleukin-20 family signaling	19	1.296	100	100	100	8.5641e+07	3.4702e+07	5.66759e+07	187383	144624	14.95	34.12	28.54	18.26	39.36	6.8686e+07	9.26194e+07	8.5641e+07	2.44651e+07	4.89465e+07	3.4702e+07	3.31391e+07	5.66759e+07	5.83356e+07
n/a	High	Master Protein	O95497	Pantetheinase [OS=Homo sapiens]		0	23	10	48	10	513	57	5.55	32.12	cellular component movement;defense response;metabolic process;regulation of biological process;response to stimulus;transport	extracellular;membrane	catalytic activity	Pf00795	8876	ENSG00000112299.7	VNN1	6		Pantothenate and CoA biosynthesis	Vitamin B5 (pantothenate) metabolism; Neutrophil degranulation; Post-translational modification: synthesis of GPI-anchored proteins	11	4.398	71.863	19.905	63.188	2.66816e+07	2.34607e+07	7.3902e+06	1.63289e+06	371283	17.09	25.83	32.58	45.9	28.53	1.97838e+07	2.66816e+07	2.74055e+07	2.04161e+07	3.31103e+07	2.34607e+07	5.48615e+06	1.05176e+07	7.3902e+06
n/a	High	Master Protein	P11413-1	Glucose-6-phosphate 1-dehydrogenase [OS=Homo sapiens]		0	25	13	50	13	515	59.2	6.84	22.19	metabolic process;regulation of biological process;response to stimulus	cytoplasm;cytosol;membrane;nucleus	catalytic activity;nucleotide binding;protein binding	Pf00479, Pf02781	2539	ENSG00000160211.15	G6PD	X	Glutathione metabolism; Pentose Phosphate Pathway; Cori Cycle; NRF2 pathway; ATM Signaling Network in Development and Disease; Sulfation Biotransformation Reaction	Central carbon metabolism in cancer; Pentose phosphate pathway; Carbon metabolism; Metabolic pathways; Glutathione metabolism	TP53 Regulates Metabolic Genes; Pentose phosphate pathway (hexose monophosphate shunt)	19	2.038	27.266	31.418	30.409	1.60653e+07	1.79168e+07	1.85111e+07	1.201e+06	589196	26.72	36	30	26.28	89.2	1.43255e+07	1.60653e+07	2.33474e+07	8.76286e+06	1.82937e+07	1.79168e+07	1.43647e+07	2.59792e+07	1.85111e+07
n/a	High	Master Protein	Q15029	116 kDa U5 small nuclear ribonucleoprotein component [OS=Homo sapiens]		0	15	13	82	12	972	109.4	5	40.86	cell organization and biogenesis;metabolic process;response to stimulus	cytosol;membrane;nucleus;spliceosomal complex	catalytic activity;nucleotide binding;protein binding;RNA binding	Pf00009, Pf00679, Pf03144, Pf03764, Pf14492	9343	ENSG00000108883.12	EFTUD2	17	mRNA Processing	Spliceosome	mRNA Splicing - Major Pathway; mRNA Splicing - Minor Pathway	7	3.756	100	100	100	6.96228e+07	3.88135e+07	7.63851e+07	70375.6	18735.6	15.49	28.42	20.52	48.77	95.93	5.45921e+07	6.96228e+07	7.416e+07	3.04526e+07	5.34124e+07	3.88135e+07	5.23415e+07	7.63851e+07	7.70348e+07
n/a	High	Master Protein	Q9Y230	RuvB-like 2 [OS=Homo sapiens]		0	24	10	91	10	463	51.1	5.64	38.41	cell organization and biogenesis;metabolic process;regulation of biological process;response to stimulus	cytoplasm;cytosol;membrane;nucleus	catalytic activity;DNA binding;nucleotide binding;protein binding	Pf00004, Pf03796, Pf06068, Pf13481	10856	ENSG00000183207.13	RUVBL2	19			HATs acetylate histones; Telomere Extension By Telomerase	8	17.099	100	100	100	1.29281e+08	6.6722e+07	9.21175e+07	9.15841e+06	535604	10.08	22.29	23.85	18.06	43.76	1.08732e+08	1.29281e+08	1.31049e+08	5.58588e+07	8.65003e+07	6.6722e+07	6.65857e+07	1.08824e+08	9.21175e+07
n/a	High	Master Protein	O95831-3	Isoform 3 of Apoptosis-inducing factor 1, mitochondrial [OS=Homo sapiens]		0	19	14	133	14	609	66.3	8.94	79.34	cell death;cell organization and biogenesis;metabolic process;regulation of biological process;response to stimulus	cytosol;membrane;mitochondrion;nucleus	catalytic activity;DNA binding;nucleotide binding;protein binding	Pf00070, Pf07992, Pf14721, Pf14962	9131	ENSG00000156709.13	AIFM1	X	Apoptosis Modulation and Signaling; Nanomaterial induced apoptosis; Apoptosis Modulation by HSP70			3	74.002	100	100	100	2.49822e+08	2.20585e+08	3.43389e+08	841315	11368.8	14.29	31.85	28.98	43.97	154.35	1.97163e+08	2.59854e+08	2.49822e+08	1.57843e+08	3.01896e+08	2.20585e+08	2.08254e+08	3.43389e+08	3.78362e+08
n/a	High	Master Protein	Q92598	Heat shock protein 105 kDa [OS=Homo sapiens]		0	14	12	80	12	858	96.8	5.39	33.06	metabolic process;regulation of biological process;response to stimulus;transport	cytoplasm;cytosol;extracellular;nucleus;organelle lumen	enzyme regulator activity;nucleotide binding;protein binding	Pf00012	10808	ENSG00000120694.19	HSPH1	13		Protein processing in endoplasmic reticulum	Scavenging by Class F Receptors; Regulation of HSF1-mediated heat shock response	8	36.812	100	100	100	1.29544e+08	3.20684e+07	1.18634e+08	390509	10608.3	6.28	29.29	25.32	38.78	70.53	1.23742e+08	1.29544e+08	1.39977e+08	3.20684e+07	5.01225e+07	3.02665e+07	7.40975e+07	1.18634e+08	1.21252e+08
n/a	High	Master Protein	P06744	glucose-6-phosphate isomerase [OS=Homo sapiens]		0	19	10	55	10	558	63.1	8.32	49.47	metabolic process;regulation of biological process;response to stimulus;transport	cytoplasm;cytosol;extracellular;membrane;organelle lumen	catalytic activity;protein binding	Pf00342	2821	ENSG00000105220.14	GPI	19	Cori Cycle; Glycolysis and Gluconeogenesis	Starch and sucrose metabolism; Amino sugar and nucleotide sugar metabolism; Pentose phosphate pathway; Carbon metabolism; Metabolic pathways; Glycolysis / Gluconeogenesis	Glycolysis; Neutrophil degranulation; Gluconeogenesis; TP53 Regulates Metabolic Genes	21	33.48	57.887	76.49	100	2.4717e+06	9.66324e+06	3.26602e+06	1.42957e+06	42698.6	7.03	23.97	33.9	13.31	124.69	2.42448e+06	2.7561e+06	2.4717e+06	6.47051e+06	1.05047e+07	9.66324e+06	1.74321e+06	3.26602e+06	3.53187e+06
n/a	High	Master Protein	O00299	chloride intracellular channel protein 1 [OS=Homo sapiens]		0	37	7	95	7	241	26.9	5.17	82.53	metabolic process;regulation of biological process;response to stimulus;transport	cytoplasm;membrane;mitochondrion;nucleus	catalytic activity;protein binding;transporter activity	Pf00043, Pf13409, Pf13410, Pf13417	1192	ENSG00000213719.8; ENSG00000206394.8; ENSG00000230685.6; ENSG00000226248.6; ENSG00000223639.6; ENSG00000226651.6; ENSG00000226417.6	CLIC1	6; CHR_HSCHR6_MHC_QBL_CTG1; CHR_HSCHR6_MHC_COX_CTG1; CHR_HSCHR6_MHC_DBB_CTG1; CHR_HSCHR6_MHC_SSTO_CTG1; CHR_HSCHR6_MHC_MANN_CTG1; CHR_HSCHR6_MHC_MCF_CTG1				0	100	100	100	100	1.97505e+07	3.60615e+06	2.75444e+07	1.47301e+06	10764.3	19.01	39.84	26.69	62.39	139.37	1.41887e+07	2.05064e+07	1.97505e+07	2.69819e+06	5.83001e+06	3.60615e+06	1.65377e+07	2.75444e+07	2.76303e+07
n/a	High	Master Protein	Q96SB3	Neurabin-2 [OS=Homo sapiens]		0	14	13	86	13	815	89.1	4.97	40.43	cell differentiation;cell organization and biogenesis;cellular component movement;development;metabolic process;regulation of biological process;response to stimulus	cytoplasm;cytoskeleton;membrane;nucleus	enzyme regulator activity;protein binding;structural molecule activity	Pf00038, Pf00595, Pf04012, Pf04111, Pf04156, Pf05557, Pf07106, Pf07888, Pf14992	84687		PPP1R9B	17				0	0.654	100	100	100	1.07549e+08	5.06024e+07	1.38595e+08	234677	358622	17.17	10.92	16.31	22.35	105.75	1.07549e+08	7.84909e+07	1.07668e+08	4.64025e+07	5.75409e+07	5.06024e+07	1.04553e+08	1.42825e+08	1.38595e+08
n/a	High	Master Protein	Q8WVV9	Heterogeneous nuclear ribonucleoprotein L-like [OS=Homo sapiens]		0	27	12	74	11	542	60	7.72	70.36	metabolic process;regulation of biological process	membrane;nucleus	protein binding;RNA binding	Pf00076, Pf13893, Pf14259	92906	ENSG00000143889.15	HNRNPLL; HNRPLL	2				0	15.367	100	100	100	1.35323e+08	2.41444e+07	6.5787e+07	184738	12021.4	10.48	25.74	24.88	33.66	106.51	1.19093e+08	1.47012e+08	1.35323e+08	2.41444e+07	3.49811e+07	2.19976e+07	4.4908e+07	6.5787e+07	7.49548e+07
n/a	High	Master Protein	Q9H4G4	Golgi-associated plant pathogenesis-related protein 1 [OS=Homo sapiens]		0	40	5	46	5	154	17.2	9.41	66.19	regulation of biological process	extracellular;Golgi;membrane	protein binding	Pf00188	152007	ENSG00000122694.15	GLIPR2	9				0	1.87	100	100	100	2.90483e+07	1.08711e+07	2.81656e+07	149908	80172.6	23.44	30.03	19.99	12.15	31.62	1.88937e+07	2.90483e+07	2.97329e+07	6.32741e+06	1.17005e+07	1.08711e+07	1.97794e+07	2.81656e+07	2.91081e+07
n/a	High	Master Protein	P47755	F-actin-capping protein subunit alpha-2 [OS=Homo sapiens]		0	50	11	79	9	286	32.9	5.85	64.8	cell organization and biogenesis;cellular component movement;coagulation;defense response;regulation of biological process;response to stimulus;transport	cytoskeleton;cytosol;extracellular;membrane	protein binding	Pf01267	830	ENSG00000198898.13	CAPZA2	7		Endocytosis	COPI-independent Golgi-to-ER retrograde traffic; Advanced glycosylation endproduct receptor signaling; COPI-mediated anterograde transport; MHC class II antigen presentation; HSP90 chaperone cycle for steroid hormone receptors (SHR); Factors involved in megakaryocyte development and platelet production	22	12.543	100	100	100	1.28085e+08	5.25782e+07	1.18372e+08	275280	21947.7	19.25	36.21	22.23	19.04	48.01	9.47136e+07	1.3941e+08	1.28085e+08	4.06591e+07	8.17096e+07	5.25782e+07	8.0741e+07	1.18372e+08	1.25516e+08
n/a	High	Master Protein	P19367-1	Hexokinase-1 [OS=Homo sapiens]		0	11	9	66	3	917	102.4	6.8	43.23	cellular homeostasis;metabolic process;regulation of biological process	cytosol;membrane;mitochondrion	catalytic activity;nucleotide binding;protein binding	Pf00349, Pf03727	3098	ENSG00000156515.21	HK1	10	Cori Cycle; Photodynamic therapy-induced HIF-1 survival signaling; Glycolysis and Gluconeogenesis; Glucuronidation	Galactose metabolism; Insulin signaling pathway; Amino sugar and nucleotide sugar metabolism; Starch and sucrose metabolism; Central carbon metabolism in cancer; Glycolysis / Gluconeogenesis; Type II diabetes mellitus; Metabolic pathways; Carbon metabolism; Carbohydrate digestion and absorption; HIF-1 signaling pathway; Fructose and mannose metabolism; Neomycin, kanamycin and gentamicin biosynthe…	Glycolysis; Defective HK1 causes hexokinase deficiency (HK deficiency)	25	10.969	100	100	100	9.17041e+07	3.58873e+07	1.06829e+08	242268	22087.6	22.47	35.34	18.6	17.49	34.45	6.21397e+07	9.7024e+07	9.17041e+07	2.52523e+07	5.16659e+07	3.58873e+07	7.60681e+07	1.06829e+08	1.07688e+08
n/a	High	Master Protein	P30040-1	Endoplasmic reticulum resident protein 29 [OS=Homo sapiens]		0	33	7	63	7	261	29	7.31	64.92	metabolic process;regulation of biological process;transport	cell surface;endoplasmic reticulum;membrane;organelle lumen	catalytic activity;protein binding	Pf07749, Pf07912	10961	ENSG00000089248.6	ERP29	12		Protein processing in endoplasmic reticulum		1	13.587	100	100	100	9.65048e+06	9.10032e+06	2.18233e+07	624861	45990.5	8.64	32.06	21.89	3.62	56.87	9.19805e+06	1.08526e+07	9.65048e+06	7.37234e+06	1.35976e+07	9.10032e+06	3.04956e+07	2.18233e+07	2.07782e+07
n/a	High	Master Protein	P32969	60S ribosomal protein L9 [OS=Homo sapiens]		0.001	37	7	26	7	192	21.9	9.95	14.45	cell organization and biogenesis;metabolic process;transport	cytosol;membrane;nucleus;ribosome	protein binding;RNA binding;structural molecule activity	Pf00347	6133	ENSG00000163682.15	RPL9	4	Cytoplasmic Ribosomal Proteins	Ribosome	Peptide chain elongation; Eukaryotic Translation Termination; Viral mRNA Translation; L13a-mediated translational silencing of Ceruloplasmin expression; Nonsense Mediated Decay (NMD) independent of the Exon Junction Complex (EJC); Selenocysteine synthesis; Nonsense Mediated Decay (NMD) enhanced by the Exon Junction Complex (EJC); GTP hydrolysis and joining of the 60S ribosomal subunit; Major path…	34	0.883	100	100	100	1.93947e+07	2.42589e+07	2.38558e+07	43532	49278.5	62.55	68.48	39.86	28.66	54.73	3.09662e+07	7.03689e+06	1.93947e+07	2.62238e+07	3.83348e+06	2.42589e+07	2.38558e+07	2.994e+07	1.2565e+07
n/a	High	Master Protein	P62333	26S proteasome regulatory subunit 10B [OS=Homo sapiens]		0	23	9	66	9	389	44.1	7.49	67.45	cell organization and biogenesis;metabolic process;regulation of biological process;response to stimulus;transport	cytoplasm;cytosol;membrane;nucleus;proteasome	catalytic activity;nucleotide binding;protein binding;RNA binding	Pf00004, Pf00910, Pf01078, Pf05496, Pf07724, Pf07726, Pf07728, Pf13191, Pf13207, Pf13401	5706	ENSG00000100519.11	PSMC6	14	Proteasome Degradation; Parkin-Ubiquitin Proteasomal System pathway	Epstein-Barr virus infection; Proteasome	Regulation of RAS by GAPs; CDT1 association with the CDC6:ORC:origin complex; Downstream TCR signaling; UCH proteinases; NIK-->noncanonical NF-kB signaling; Hh mutants that don't undergo autocatalytic processing are degraded by ERAD; SCF-beta-TrCP mediated degradation of Emi1; Cross-presentation of soluble exogenous antigens (endosomes); Separation of Sister Chromatids; Vpu mediated degradation o…	152	100	100	100	100	5.12081e+07	3.02348e+07	3.50049e+07	1.99206e+06	13419.9	8.1	27.52	19.87	67.53	102.67	4.46083e+07	5.1777e+07	5.12081e+07	2.51615e+07	4.26431e+07	3.02348e+07	2.64028e+07	3.50049e+07	3.95761e+07
n/a	High	Master Protein	Q9Y265	RuvB-like 1 [OS=Homo sapiens]		0	18	7	51	7	456	50.2	6.42	19.13	cell division;cell organization and biogenesis;metabolic process;regulation of biological process;response to stimulus	cytoplasm;cytoskeleton;cytosol;membrane;nucleus	catalytic activity;nucleotide binding;protein binding	Pf00004, Pf01078, Pf01695, Pf05496, Pf06068, Pf06414, Pf07726, Pf13191, Pf13238, Pf13245, Pf13481	8607	ENSG00000175792.11	RUVBL1	3	Gastric Cancer Network 1	Wnt signaling pathway	Ub-specific processing proteases; UCH proteinases; DNA Damage Recognition in GG-NER; HATs acetylate histones; Formation of the beta-catenin:TCF transactivating complex; Telomere Extension By Telomerase; Deposition of new CENPA-containing nucleosomes at the centromere	25	0.165	100	100	100	3.26767e+07	9.79595e+06	2.73378e+07	7063.33	42716.5	33	28.6	31.22		83.67	1.77736e+07	3.52212e+07	3.26767e+07	7.39384e+06	1.31523e+07	9.79595e+06	1.52416e+07	2.73378e+07	2.87364e+07
n/a	High	Master Protein	Q9Y4L1	Hypoxia up-regulated protein 1 [OS=Homo sapiens]		0	13	14	81	14	999	111.3	5.22	39.8	regulation of biological process;response to stimulus;transport	endoplasmic reticulum;extracellular;membrane;organelle lumen	nucleotide binding;protein binding	Pf00012	10525	ENSG00000280682.2; ENSG00000149428.18	HYOU1	11; CHR_HG2217_PATCH		Protein processing in endoplasmic reticulum	Scavenging by Class F Receptors; XBP1(S) activates chaperone genes	8	3.271	100	100	100	5.43824e+07	5.34747e+07	8.85126e+07	85421.6	26117.3	10.6	21.73	17.83	49.5	80.36	5.78056e+07	4.68206e+07	5.43824e+07	6.45149e+07	4.14266e+07	5.34747e+07	1.114e+08	8.85126e+07	7.91656e+07
n/a	High	Master Protein	P62136-1	serine/threonine-protein phosphatase PP1-alpha catalytic subunit [OS=Homo sapiens]		0	21	6	89	3	330	37.5	6.33	62.26	cell division;metabolic process;regulation of biological process;response to stimulus	cytoplasm;cytosol;membrane;nucleus	catalytic activity;metal ion binding;protein binding	Pf00149	5499	ENSG00000172531.14	PPP1CA	11	Nicotine Activity on Dopaminergic Neurons; Common Pathways Underlying Drug Addiction	Focal adhesion; Hippo signaling pathway; Dopaminergic synapse; Alcoholism; mRNA surveillance pathway; Long-term potentiation; Amphetamine addiction; Platelet activation; Herpes simplex infection; Proteoglycans in cancer; Vascular smooth muscle contraction; cAMP signaling pathway; Adrenergic signaling in cardiomyocytes; Inflammatory mediator regulation of TRP channels; Oxytocin signaling pathway; …	Signaling by GPCR; Triglyceride catabolism; DARPP-32 events; Downregulation of TGF-beta receptor signaling; Circadian Clock	35	100	100	100	100	4.13467e+07	9.99358e+06	3.88915e+07	8622.72		18.5	36.15	31.37			2.98405e+07	4.25351e+07	4.13467e+07	8.38583e+06	1.62897e+07	9.99358e+06	2.29218e+07	3.88915e+07	4.42314e+07
n/a	High	Master Protein	O60313-2	Isoform 2 of Dynamin-like 120 kDa protein, mitochondrial [OS=Homo sapiens]		0	14	14	87	14	997	115.8	7.87	49.43	cell death;cell organization and biogenesis;cellular component movement;cellular homeostasis;metabolic process;regulation of biological process;response to stimulus;transport	cytosol;membrane;mitochondrion	catalytic activity;metal ion binding;nucleotide binding;protein binding	Pf00350, Pf01926	4976	ENSG00000198836.8	OPA1	3				0	2.23	100	100	100	1.59225e+08	5.56629e+07	1.48315e+08	156820	70334.8	14.63	28.41	21.79	19.76	70.6	1.22441e+08	1.60315e+08	1.59225e+08	5.47299e+07	8.76721e+07	5.56629e+07	1.01748e+08	1.48315e+08	1.56469e+08
n/a	High	Master Protein	P04179	Superoxide dismutase [Mn], mitochondrial [OS=Homo sapiens]		0.001	39	6	17	6	222	24.7	8.25	12.02	cell organization and biogenesis;metabolic process;regulation of biological process;response to stimulus	mitochondrion;organelle lumen	antioxidant activity;catalytic activity;metal ion binding;protein binding	Pf00081, Pf02777	6648		SOD2	6	Selenium Micronutrient Network; Vitamin B12 Metabolism; Folate Metabolism; VEGFA-VEGFR2 Signaling Pathway; One carbon metabolism and related pathways; Oxidative Stress; DNA Damage Response (only ATM dependent)	FoxO signaling pathway; Huntington's disease; Longevity regulating pathway; Peroxisome; Longevity regulating pathway - multiple species	Gene and protein expression by JAK-STAT signaling after Interleukin-12 stimulation; Transcriptional activation of mitochondrial biogenesis; Deregulated CDK5 triggers multiple neurodegenerative pathways in Alzheimer's disease models; Interleukin-12 family signaling; Detoxification of Reactive Oxygen Species	26	12.868	29.571	1.153	53.386	847156	1.52945e+06	33027.3	368641	28648.6	37.75	55.34	153.31	19.5	60.99	670160	847156	1.36875e+06		2.31224e+06	1.01166e+06	17906.2	33027.3	612861
n/a	High	Master Protein	Q99729-2	Isoform 2 of Heterogeneous nuclear ribonucleoprotein A/B [OS=Homo sapiens]		0	23	6	55	5	332	35.9	6.95	53.71	cell organization and biogenesis;regulation of biological process	cytoplasm;nucleus	DNA binding;protein binding;RNA binding	Pf00076, Pf08143, Pf13893, Pf14259	3182	ENSG00000197451.11	HNRNPAB	5	Preimplantation Embryo; mRNA Processing			2	0.01	100	100	68.952	6.51019e+06	4.05144e+06	8.37809e+06		58757	14.85	37.68	2.21		60.58	5.29057e+06	6.51019e+06	7.13305e+06	4.05144e+06	1.88507e+06	4.07336e+06	8.37809e+06	8.66827e+06	8.3194e+06
n/a	High	Master Protein	Q99879	Histone H2B type 1-M [OS=Homo sapiens]		0	58	10	232	5	126	14	10.32	100.36	cell organization and biogenesis;metabolic process	chromosome;cytosol;nucleus	DNA binding;protein binding	Pf00125, Pf00808	8342	ENSG00000273703.1	HIST1H2BM	6		Systemic lupus erythematosus; Alcoholism; Viral carcinogenesis	SIRT1 negatively regulates rRNA expression; Nonhomologous End-Joining (NHEJ); Activation of anterior HOX genes in hindbrain development during early embryogenesis; NoRC negatively regulates rRNA expression; Meiotic synapsis; Transcriptional regulation by small RNAs; Meiotic recombination; PRC2 methylates histones and DNA; Recruitment and ATM-mediated phosphorylation of repair and signaling protei…	77	20.139	100	100	100	3.82869e+09	6.18842e+08	3.39738e+09	1.65077e+07	819700	15.84	4.1	15.06	16.05	78.21	3.82869e+09	2.88906e+09	3.88666e+09	5.86726e+08	6.36306e+08	6.18842e+08	3.23984e+09	4.25603e+09	3.39738e+09
n/a	High	Master Protein	Q9UBS4	DnaJ homolog subfamily B member 11 [OS=Homo sapiens]		0	24	7	50	7	358	40.5	6.18	43.48	metabolic process;regulation of biological process	cytoplasm;endoplasmic reticulum;membrane;nucleus;organelle lumen	protein binding	Pf00226, Pf01556	51726	ENSG00000090520.11	DNAJB11	3	Photodynamic therapy-induced unfolded protein response	Protein processing in endoplasmic reticulum	XBP1(S) activates chaperone genes	6	100	100	100	100	1.82816e+07	9.31127e+06	2.46543e+07	6639.03		21.3	21.05	21.22			1.82816e+07	1.44465e+07	2.22517e+07	7.36783e+06	9.31127e+06	1.12925e+07	1.80573e+07	2.46543e+07	2.78445e+07
n/a	High	Master Protein	P25786-1	Proteasome subunit alpha type-1 [OS=Homo sapiens]		0	41	11	59	11	263	29.5	6.61	24.91	metabolic process;regulation of biological process;response to stimulus;transport	cytoplasm;cytosol;nucleus;proteasome	catalytic activity;protein binding;RNA binding	Pf00227, Pf10584	5682	ENSG00000129084.17	PSMA1	11	Proteasome Degradation	Proteasome	Regulation of RAS by GAPs; CDT1 association with the CDC6:ORC:origin complex; Downstream TCR signaling; UCH proteinases; NIK-->noncanonical NF-kB signaling; Hh mutants that don't undergo autocatalytic processing are degraded by ERAD; SCF-beta-TrCP mediated degradation of Emi1; Cross-presentation of soluble exogenous antigens (endosomes); Separation of Sister Chromatids; Vpu mediated degradation o…	150	21.825	100	100	100	9.03671e+07	2.43891e+07	5.24949e+07	501250	22966.5	19.15	23.71	17.93	44.8	113.99	9.10019e+07	6.36098e+07	9.03671e+07	2.43891e+07	1.6215e+07	2.60599e+07	4.70936e+07	6.63202e+07	5.24949e+07
n/a	High	Master Protein	P14314-2	Isoform 2 of Glucosidase 2 subunit beta [OS=Homo sapiens]		0	18	8	44	8	525	59.1	4.42	36.1	metabolic process;regulation of biological process;response to stimulus	endoplasmic reticulum;organelle lumen	metal ion binding;protein binding	Pf07915, Pf12999, Pf13015	5589	ENSG00000130175.9	PRKCSH	19				0	29.096	100	100	100	1.0844e+07	7.37371e+06	2.08174e+07	155326	5338.39	18.81	10.03	3.77	7.65	116.77	8.86253e+06	1.29581e+07	1.0844e+07	7.72088e+06	7.37371e+06	6.34311e+06	2.08174e+07	2.20912e+07	2.06185e+07
n/a	High	Master Protein	Q9Y277	Voltage-dependent anion-selective channel protein 3 [OS=Homo sapiens]		0	31	8	44	8	283	30.6	8.66	27.78	cell communication;defense response;regulation of biological process;response to stimulus;transport	membrane;mitochondrion;nucleus	nucleotide binding;transporter activity	Pf01459	7419	ENSG00000078668.13	VDAC3	8		HTLV-I infection; Viral carcinogenesis; Calcium signaling pathway; cGMP-PKG signaling pathway; NOD-like receptor signaling pathway; Parkinson's disease; Huntington's disease; Hepatitis B	Mitochondrial calcium ion transport; Ub-specific processing proteases	14	48.902	100	100	100	1.43391e+07	5.56535e+06	1.47383e+07	171495	3506.88	23.47	32.12	33.96	77.94	3.12	9.69519e+06	1.55721e+07	1.43391e+07	4.44795e+06	8.25304e+06	5.56535e+06	7.88344e+06	1.47383e+07	1.60198e+07
n/a	High	Master Protein	Q8N6Q3	CD177 antigen [OS=Homo sapiens]		0	14	4	32	4	437	46.3	6.29	53.12	cell organization and biogenesis;cellular component movement;coagulation;regulation of biological process;transport	membrane	protein binding	Pf00021	57126		CD177	19			Common Pathway of Fibrin Clot Formation; Neutrophil degranulation; Cell surface interactions at the vascular wall	7	2.621	6.3	4.551	2.258	1.63651e+06	586494	1.18234e+06	680788	259780	22.67	44.45	15.64	18.5	89.15	1.43385e+06	2.20262e+06	1.63651e+06	254253	586494	686610	940565	1.18234e+06	1.28716e+06
n/a	High	Master Protein	Q8N1N4	Keratin, type II cytoskeletal 78 [OS=Homo sapiens]		0	33	19	77	14	520	56.8	6.02	72.32	cell death	cytosol	structural molecule activity	Pf00038, Pf12128, Pf13166	196374	ENSG00000170423.12	KRT78	12			Formation of the cornified envelope	3	1.191	46.389	20.961	14.564	3.46804e+07	1.08878e+07	1.56701e+07	890161	747597	59.72	15.65	36.67	14.82	4.97	3.46804e+07	1.38896e+07	5.52114e+07	1.03349e+07	1.37324e+07	1.08878e+07	1.11865e+07	1.56701e+07	2.3317e+07
n/a	High	Master Protein	P62906	60S ribosomal protein L10A [OS=Homo sapiens]		0	40	10	54	10	217	24.8	9.94	35.02	cell organization and biogenesis;metabolic process;response to stimulus;transport	cytosol;membrane;nucleus;ribosome	protein binding;RNA binding;structural molecule activity	Pf00687	4736	ENSG00000198755.10	RPL10A	6	Cytoplasmic Ribosomal Proteins	Ribosome	Peptide chain elongation; Eukaryotic Translation Termination; Viral mRNA Translation; L13a-mediated translational silencing of Ceruloplasmin expression; Nonsense Mediated Decay (NMD) independent of the Exon Junction Complex (EJC); Selenocysteine synthesis; Nonsense Mediated Decay (NMD) enhanced by the Exon Junction Complex (EJC); GTP hydrolysis and joining of the 60S ribosomal subunit; Major path…	34	1.812	100	100	54.717	8.80195e+07	3.96968e+07	8.82744e+07	1.3148e+06	725489	13.97	28.63	25.61	11.93	23.15	6.86356e+07	8.88117e+07	8.80195e+07	2.70404e+07	4.90604e+07	3.96968e+07	5.72981e+07	8.82744e+07	9.64766e+07
n/a	High	Master Protein	P06737-1	Glycogen phosphorylase, liver form [OS=Homo sapiens]		0	21	20	81	17	847	97.1	7.17	43.92	cell death;metabolic process;transport	cytoplasm;cytosol;extracellular;organelle lumen	catalytic activity;nucleotide binding;protein binding	Pf00343	5836	ENSG00000100504.16	PYGL	14	TNF alpha Signaling Pathway; Glycogen Metabolism	Glucagon signaling pathway; Insulin resistance; Starch and sucrose metabolism; Insulin signaling pathway; Metabolic pathways	Neutrophil degranulation; Glycogen breakdown (glycogenolysis)	14	11.516	100	100	100	4.55887e+07	2.29941e+07	3.638e+07	2.09202e+06	181660	18.88	23.97	23.53	59.12	46.77	3.26e+07	4.55887e+07	4.67806e+07	1.80134e+07	2.92096e+07	2.29941e+07	2.56868e+07	3.638e+07	4.16494e+07
n/a	High	Master Protein	P63104-1	14-3-3 protein zeta/delta [OS=Homo sapiens]		0	31	9	84	7	245	27.7	4.79	84.41	cell organization and biogenesis;metabolic process;regulation of biological process;response to stimulus;transport	cytoplasm;cytosol;membrane;mitochondrion;nucleus	catalytic activity;protein binding;RNA binding	Pf00244	7534	ENSG00000164924.17	YWHAZ	8	Cell Cycle; Prolactin Signaling Pathway; Pathogenic Escherichia coli infection; Myometrial Relaxation and Contraction Pathways; Calcium Regulation in the Cardiac Cell; Sudden Infant Death Syndrome (SIDS) Susceptibility Pathways	Epstein-Barr virus infection; Viral carcinogenesis; Oocyte meiosis; Hepatitis B; Cell cycle; PI3K-Akt signaling pathway; Hippo signaling pathway; Pathogenic Escherichia coli infection	Chk1/Chk2(Cds1) mediated inactivation of Cyclin B:Cdk1 complex; Interleukin-3, 5 and GM-CSF signaling; KSRP (KHSRP) binds and destabilizes mRNA; Activation of BAD and translocation to mitochondria ; GP1b-IX-V activation signalling; Translocation of GLUT4 to the plasma membrane; Rap1 signalling; Deactivation of the beta-catenin transactivating complex; TP53 Regulates Metabolic Genes; RHO GTPases a…	51	2.845	16.552	18.502	58.313	1.90369e+07	6.70653e+07	2.12797e+07	3.27183e+06	1.1501e+06	16.26	17.63	9.38	17.72	47.23	1.90369e+07	2.39686e+07	1.77281e+07	6.47172e+07	8.81857e+07	6.70653e+07	1.8412e+07	2.20897e+07	2.12797e+07
n/a	High	Master Protein	P04843	Dolichyl-diphosphooligosaccharide--protein glycosyltransferase subunit 1 [OS=Homo sapiens]		0	22	15	89	15	607	68.5	6.38	35.21	metabolic process	cytosol;endoplasmic reticulum;membrane	catalytic activity;protein binding;RNA binding	Pf04597	6184	ENSG00000163902.11	RPN1	3	Proteasome Degradation	Protein processing in endoplasmic reticulum; Metabolic pathways; N-Glycan biosynthesis	Asparagine N-linked glycosylation; SRP-dependent cotranslational protein targeting to membrane	9	44.179	100	100	100	1.5246e+08	6.32095e+07	1.85965e+08	2.49718e+06	56523.9	12.53	23.11	26.16	68.09	131.43	1.30319e+08	1.5246e+08	1.67761e+08	4.86536e+07	7.78828e+07	6.32095e+07	1.16799e+08	1.97397e+08	1.85965e+08
n/a	High	Master Protein	Q13085-2	Isoform 2 of Acetyl-CoA carboxylase 1 [OS=Homo sapiens]		0	5	10	62	9	2288	259.5	6.58	42.75	cell organization and biogenesis;metabolic process;regulation of biological process;response to stimulus;transport	cytoskeleton;cytosol;mitochondrion	catalytic activity;metal ion binding;nucleotide binding;protein binding	Pf00289, Pf00364, Pf01039, Pf02222, Pf02655, Pf02785, Pf02786, Pf07478, Pf08326, Pf13535, Pf15632	31	ENSG00000278540.4; ENSG00000275176.4	ACACA	17; CHR_HSCHR17_7_CTG4	AMP-activated Protein Kinase (AMPK) Signaling; Sterol Regulatory Element-Binding Proteins (SREBP) signalling; Leptin signaling pathway; Corticotropin-releasing hormone signaling pathway; Mesodermal Commitment Pathway; Fatty Acid Biosynthesis; VEGFA-VEGFR2 Signaling Pathway; Focal Adhesion-PI3K-Akt-mTOR-signaling pathway; Leptin and adiponectin			9	2.561	100	100	100	8.58392e+07	1.48941e+08	2.86537e+08	36415.5	14218	7.75	21.28	23.01	65.49	69.52	7.52275e+07	8.67289e+07	8.58392e+07	1.38456e+08	2.03283e+08	1.48941e+08	1.9706e+08	2.86537e+08	3.1411e+08
n/a	High	Master Protein	Q9BR76	Coronin-1B [OS=Homo sapiens]		0	14	10	143	10	489	54.2	5.88	73.27	cell organization and biogenesis;cellular component movement;regulation of biological process;response to stimulus	cytoplasm;cytoskeleton;cytosol;membrane	protein binding	Pf00400, Pf08953, Pf08954	57175	ENSG00000172725.13	CORO1B	11				0	29.621	100	100	100	2.8369e+08	2.13595e+08	6.12962e+08	1.43176e+06	48335.1	12.59	3.73	18.86	17.43	88.1	2.8369e+08	2.44496e+08	3.15116e+08	2.15939e+08	2.0133e+08	2.13595e+08	4.35416e+08	6.12962e+08	6.21243e+08
n/a	High	Master Protein	P61160-1	Actin-related protein 2 [OS=Homo sapiens]		0	24	10	56	10	394	44.7	6.74	21.48	cell division;cell organization and biogenesis;cellular component movement;regulation of biological process;response to stimulus;transport	cytoplasm;cytoskeleton;cytosol;extracellular;membrane;organelle lumen	nucleotide binding;protein binding;structural molecule activity	Pf00022	10097	ENSG00000138071.13	ACTR2	2	Association Between Physico-Chemical Features and Toxicity Associated Pathways; ESC Pluripotency Pathways		EPHB-mediated forward signaling; Neutrophil degranulation; Clathrin-mediated endocytosis; RHO GTPases Activate WASPs and WAVEs; Regulation of actin dynamics for phagocytic cup formation	18	14.194	100	100	100	7.48018e+07	1.41054e+08	8.18728e+07	450954	31770.7	21.39	27.49	28.82	50.43	3	6.4897e+07	9.79172e+07	7.48018e+07	1.2016e+08	2.01839e+08	1.41054e+08	4.8462e+07	8.18728e+07	8.6793e+07
n/a	High	Master Protein	Q12906-1	Interleukin enhancer-binding factor 3 [OS=Homo sapiens]		0	14	11	40	11	894	95.3	8.76	34.4	defense response;metabolic process;regulation of biological process;response to stimulus	cytoplasm;extracellular;membrane;mitochondrion;nucleus	DNA binding;protein binding;RNA binding	Pf00035, Pf07528, Pf14709	3609	ENSG00000129351.17	ILF3	19				0	0.183	100	100	100	5.78319e+07	1.94756e+07	4.85625e+07	3702.02	20259.3	15.03	37.14	26.12		132.23	4.71074e+07	6.37833e+07	5.78319e+07	1.35298e+07	2.86871e+07	1.94756e+07	2.95763e+07	4.89053e+07	4.85625e+07
n/a	High	Master Protein	Q8N1F7-1	Nuclear pore complex protein Nup93 [OS=Homo sapiens]		0	16	11	74	11	819	93.4	5.72	58.42	cell organization and biogenesis;cellular component movement;metabolic process;regulation of biological process;response to stimulus;transport	membrane;nucleus	protein binding;structural molecule activity	Pf04097	9688	ENSG00000102900.12	NUP93	16		RNA transport	Rev-mediated nuclear export of HIV RNA; ISG15 antiviral mechanism; NEP/NS2 Interacts with the Cellular Export Machinery; tRNA processing in the nucleus; Transcriptional regulation by small RNAs; Nuclear Pore Complex (NPC) Disassembly; Regulation of Glucokinase by Glucokinase Regulatory Protein; Vpr-mediated nuclear import of PICs; Regulation of HSF1-mediated heat shock response; snRNP Assembly; S…	64	0.817	100	100	100	3.4873e+07	7.17151e+06	2.14606e+07	19953.5	24408	24.61	35.93	32.77	76.59	24.17	2.40206e+07	3.98689e+07	3.4873e+07	6.63727e+06	1.23016e+07	7.17151e+06	1.3025e+07	2.14606e+07	2.60692e+07
n/a	Medium	Master Protein	P52943	Cysteine-rich protein 2 [OS=Homo sapiens]		0.023	41	9	38	9	208	22.5	8.72	0	regulation of biological process		metal ion binding;protein binding	Pf00412	1397	ENSG00000182809.10	CRIP2	14				0	0.455	100	100	100	1.23199e+08	3.30708e+07	1.2133e+08	2602.76	5720.97	13.01	21.51	21.86			1.02836e+08	1.33459e+08	1.23199e+08	3.30708e+07	4.69474e+07	3.28039e+07	8.23729e+07	1.2133e+08	1.26245e+08
n/a	High	Master Protein	P46782	40S ribosomal protein S5 [OS=Homo sapiens]		0	31	9	103	9	204	22.9	9.72	57.5	cell organization and biogenesis;metabolic process;regulation of biological process;transport	cytosol;membrane;ribosome	protein binding;RNA binding;structural molecule activity	Pf00177	6193	ENSG00000083845.8	RPS5	19	Cytoplasmic Ribosomal Proteins	Ribosome	Peptide chain elongation; Eukaryotic Translation Termination; Viral mRNA Translation; Formation of the ternary complex, and subsequently, the 43S complex; L13a-mediated translational silencing of Ceruloplasmin expression; Selenocysteine synthesis; Nonsense Mediated Decay (NMD) independent of the Exon Junction Complex (EJC); Nonsense Mediated Decay (NMD) enhanced by the Exon Junction Complex (EJC)…	38	35.297	100	100	100	2.82524e+08	1.14234e+08	3.3227e+08	346001	9802.52	7.99	10.38	19.5	26.94	139.96	2.82524e+08	2.6446e+08	3.0978e+08	1.0967e+08	1.14234e+08	1.32973e+08	2.35634e+08	3.43249e+08	3.3227e+08
n/a	High	Master Protein	P01857	Immunoglobulin heavy constant gamma 1 [OS=Homo sapiens]		0	35	10	50	7	330	36.1	8.19	36.8	cell organization and biogenesis;cellular component movement;defense response;metabolic process;regulation of biological process;response to stimulus;transport	extracellular;membrane	catalytic activity;metal ion binding;protein binding	Pf07654, Pf08205	3500	ENSG00000277633.5; ENSG00000211896.7	IGHG1	14; CHR_HSCHR14_3_CTG1			Regulation of Complement cascade; Classical antibody-mediated complement activation; FCGR activation; Regulation of actin dynamics for phagocytic cup formation; Interleukin-4 and 13 signaling; Role of phospholipids in phagocytosis	14	0.713	45.259	93.644	11.091	1.21511e+07	2.97756e+06	2.51415e+07	191316	268478	8.65	46.68	41.75	30.37	64.41	1.05128e+07	1.23537e+07	1.21511e+07	2.97756e+06	6.13168e+06	2.84615e+06	1.05766e+07	2.51415e+07	2.55253e+07
n/a	High	Master Protein	Q9BY15	Adhesion G protein-coupled receptor E3 [OS=Homo sapiens]		0	15	8	28	8	652	72.6	8.05	31.16	regulation of biological process;response to stimulus;transport	extracellular;membrane	metal ion binding;receptor activity;signal transducer activity	Pf00002, Pf01825, Pf07645, Pf12947	84658	ENSG00000131355.14	EMR3; ADGRE3	19	GPCRs, Other		Neutrophil degranulation; Class B/2 (Secretin family receptors)	8	3.927	3.754	5.686	2.097	1.89431e+06	1.05799e+06	2.86933e+06	1.98138e+06	504597	3.35	24.59	21.56	11.64	14.2		1.84989e+06	1.9398e+06	692408	1.13534e+06	1.05799e+06	2.43138e+06	2.86933e+06	3.70536e+06
n/a	High	Master Protein	P23284	peptidyl-prolyl cis-trans isomerase B [OS=Homo sapiens]		0	48	11	76	11	216	23.7	9.41	45.74	metabolic process;regulation of biological process	endoplasmic reticulum;membrane;nucleus;organelle lumen	catalytic activity;protein binding;RNA binding	Pf00160	5479	ENSG00000166794.4	PPIB	15	Prolactin Signaling Pathway		Collagen biosynthesis and modifying enzymes	4	100	100	100	100	8.2686e+07	6.57317e+07	1.89812e+08	2.47444e+06	4192.46	18.11	30.74	28.63	17.28	144.79	6.12027e+07	8.2686e+07	8.73825e+07	5.45352e+07	9.75638e+07	6.57317e+07	1.12122e+08	1.89812e+08	1.99294e+08
n/a	High	Master Protein	P0DMV8	heat shock 70 kDa protein 1A [OS=Homo sapiens]		0	25	15	93	12	641	70	5.66	123.11	cell organization and biogenesis;metabolic process;regulation of biological process;response to stimulus;transport	cytoplasm;cytoskeleton;cytosol;endoplasmic reticulum;extracellular;mitochondrion;nucleus	catalytic activity;nucleotide binding;protein binding;receptor activity;RNA binding	Pf00012, Pf06723	3304; 3303	ENSG00000232804.5; ENSG00000234475.5; ENSG00000231555.4; ENSG00000235941.5; ENSG00000204389.9; ENSG00000204388.6; ENSG00000212866.6; ENSG00000237724.5; ENSG00000224501.5	HSPA1B; HSPA1A	6; CHR_HSCHR6_MHC_APD_CTG1; CHR_HSCHR6_MHC_DBB_CTG1; CHR_HSCHR6_MHC_QBL_CTG1; CHR_HSCHR6_MHC_COX_CTG1	Apoptosis Modulation and Signaling; Parkin-Ubiquitin Proteasomal System pathway; NRF2 pathway; MAPK Signaling Pathway; Apoptosis Modulation by HSP70; VEGFA-VEGFR2 Signaling Pathway	Epstein-Barr virus infection; Toxoplasmosis; Legionellosis; Prion diseases; Protein processing in endoplasmic reticulum; Estrogen signaling pathway; Longevity regulating pathway - multiple species; MAPK signaling pathway; Influenza A; Endocytosis; Spliceosome; Measles; Antigen processing and presentation	AUF1 (hnRNP D0) binds and destabilizes mRNA; Attenuation phase; Neutrophil degranulation; Regulation of HSF1-mediated heat shock response; Viral RNP Complexes in the Host Cell Nucleus; HSP90 chaperone cycle for steroid hormone receptors (SHR)	38	29.501	68.903	64.171	100	3.06881e+06	1.60219e+07	2.85805e+06	1.3139e+06	44538	55.36	25.78	61.4	18.42	107.07	3.06881e+06	5.14723e+06	1.55564e+06	1.60219e+07	2.30784e+07	1.44359e+07	2.79486e+06	2.85805e+06	7.48251e+06
n/a	High	Master Protein	P61224-3	Isoform 3 of Ras-related protein Rap-1b [OS=Homo sapiens]		0	37	7	62	1	165	18.8	8.53	45.05	cell organization and biogenesis;cell proliferation;regulation of biological process;response to stimulus;transport	cytosol;membrane	catalytic activity;nucleotide binding;protein binding	Pf00071, Pf08477	5908	ENSG00000127314.17	RAP1B	12	Integrin-mediated Cell Adhesion; Human Thyroid Stimulating Hormone (TSH) signaling pathway; Corticotropin-releasing hormone signaling pathway; Common Pathways Underlying Drug Addiction; Focal Adhesion; Signaling of Hepatocyte Growth Factor Receptor; MAPK Signaling Pathway; VEGFA-VEGFR2 Signaling Pathway; Chemokine signaling pathway			9	100	100	100	100	759138	549137	1.41034e+06	39803.9		28.36	37.35	39.36	36.59		453909	804842	759138	317769	707477	549137	676870	1.58491e+06	1.41034e+06
n/a	High	Master Protein	Q14254	Flotillin-2 [OS=Homo sapiens]		0	24	9	61	9	428	47	5.25	41.59	cell organization and biogenesis;regulation of biological process	cytoskeleton;endosome;membrane	protein binding	Pf01145	2319	ENSG00000132589.15	FLOT2	17	Angiopoietin Like Protein 8 Regulatory Pathway; Insulin Signaling	Insulin signaling pathway	Synaptic adhesion-like molecules	6	100	100	100	100	1.08004e+07	1.19424e+07	5.44527e+06	1.10212e+06	4822.79	16.61	20.22	14.83	12.74	83.03	8.5066e+06	1.08004e+07	1.18894e+07	1.19424e+07	1.62685e+07	1.13973e+07	4.45516e+06	5.44527e+06	6.0089e+06
n/a	High	Master Protein	Q6UB35-1	Monofunctional C1-tetrahydrofolate synthase, mitochondrial [OS=Homo sapiens]		0	11	8	69	8	978	105.7	8.06	36.5	metabolic process	membrane;mitochondrion;organelle lumen	catalytic activity;nucleotide binding;protein binding	Pf00763, Pf01268, Pf02882	25902	ENSG00000120254.15	MTHFD1L	6	One Carbon Metabolism; Trans-sulfuration and one carbon metabolism	Metabolic pathways; One carbon pool by folate	Metabolism of folate and pterines	8	4.564	100	100	100	7.95529e+07	5.70364e+07	1.44657e+08	37596.9	8238.38	13.17	16.26	19.08	34.32	61.22	7.61566e+07	7.95529e+07	9.68238e+07	5.70364e+07	7.40571e+07	5.59975e+07	1.04872e+08	1.44657e+08	1.526e+08
n/a	High	Master Protein	P35998	26S proteasome regulatory subunit 7 [OS=Homo sapiens]		0	16	6	60	6	433	48.6	5.95	71.17	cell differentiation;metabolic process;regulation of biological process;response to stimulus;transport	cytoplasm;cytosol;extracellular;membrane;nucleus;organelle lumen;proteasome	catalytic activity;nucleotide binding;protein binding	Pf00004, Pf00158, Pf07724, Pf07726, Pf07728, Pf13191, Pf13401	5701	ENSG00000161057.11	PSMC2	7	Proteasome Degradation; Parkin-Ubiquitin Proteasomal System pathway	Proteasome; Epstein-Barr virus infection	Regulation of RAS by GAPs; CDT1 association with the CDC6:ORC:origin complex; Downstream TCR signaling; UCH proteinases; NIK-->noncanonical NF-kB signaling; Hh mutants that don't undergo autocatalytic processing are degraded by ERAD; SCF-beta-TrCP mediated degradation of Emi1; Neutrophil degranulation; Cross-presentation of soluble exogenous antigens (endosomes); Separation of Sister Chromatids; …	153	100	100	100	100	3.30326e+07	9.74283e+06	1.78881e+07	100979		10.15	22.98	22.39	51.09		3.14137e+07	3.80668e+07	3.30326e+07	8.75486e+06	1.33934e+07	9.74283e+06	1.18938e+07	1.83123e+07	1.78881e+07
n/a	High	Master Protein	P17096-2	Isoform HMG-Y of High mobility group protein HMG-I/HMG-Y [OS=Homo sapiens]		0	34	4	57	1	96	10.7	10.32	59.59	cell organization and biogenesis;metabolic process;regulation of biological process;response to stimulus;transport	chromosome;cytosol;nucleus	catalytic activity;DNA binding;protein binding		3159	ENSG00000137309.19	HMGA1	6	Adipogenesis; Preimplantation Embryo; Senescence and Autophagy in Cancer			3	2.679	100	100	100	1.28832e+08	2.39821e+07	1.30687e+08	130125	48570.3	8.63	22.76	13.1	11.33	69.35	1.19836e+08	1.42186e+08	1.28832e+08	2.4459e+07	1.57888e+07	2.39821e+07	1.05004e+08	1.30687e+08	1.3489e+08
n/a	High	Master Protein	P55769	NHP2-like protein 1 [OS=Homo sapiens]		0	40	4	54	4	128	14.2	8.46	66.96	cell organization and biogenesis;metabolic process	nucleus;spliceosomal complex	protein binding;RNA binding	Pf01248	4809	ENSG00000100138.13	NHP2L1; SNU13	22	mRNA Processing	Spliceosome; Ribosome biogenesis in eukaryotes	Major pathway of rRNA processing in the nucleolus and cytosol; rRNA modification in the nucleus and cytosol; mRNA Splicing - Major Pathway; mRNA Splicing - Minor Pathway	12	97.109	100	100	100	5.32281e+07	6.07811e+07	5.69507e+07	1.17513e+06	12101.2	20	20.26	38.11	23.22		4.06842e+07	5.32281e+07	6.11989e+07	4.59408e+07	6.94696e+07	6.07811e+07	2.69153e+07	5.69507e+07	5.9945e+07
n/a	High	Master Protein	Q02543	60S ribosomal protein L18a [OS=Homo sapiens]		0	32	7	64	7	176	20.7	10.71	75.73	cell organization and biogenesis;metabolic process;response to stimulus;transport	cytosol;membrane;ribosome	protein binding;RNA binding;structural molecule activity	Pf01775	6142	ENSG00000105640.12	RPL18A	19	Cytoplasmic Ribosomal Proteins	Ribosome	Peptide chain elongation; Eukaryotic Translation Termination; Viral mRNA Translation; L13a-mediated translational silencing of Ceruloplasmin expression; Nonsense Mediated Decay (NMD) independent of the Exon Junction Complex (EJC); Selenocysteine synthesis; Nonsense Mediated Decay (NMD) enhanced by the Exon Junction Complex (EJC); GTP hydrolysis and joining of the 60S ribosomal subunit; Major path…	34	4.61	100	100	100	5.08086e+07	1.2695e+07	3.90955e+07	304085	65963.6	17.01	35.64	32.12	75.71	76.52	4.02175e+07	5.08086e+07	5.67641e+07	7.42365e+06	1.58985e+07	1.2695e+07	2.15523e+07	4.17049e+07	3.90955e+07
n/a	High	Master Protein	P51148-2	Isoform 2 of Ras-related protein Rab-5C [OS=Homo sapiens]		0	24	5	36	3	249	27	8.66	33.91	regulation of biological process;response to stimulus;transport	endosome;membrane	catalytic activity;nucleotide binding;protein binding	Pf00009, Pf00025, Pf00071, Pf04670, Pf08477	5878	ENSG00000108774.14	RAB5C	17				0	92.748	100	100	100	913240	8.2595e+06	1.33646e+07	269459	2905.26	58.36	26.92	32.88	23.84	145.41	591576	1.84686e+06	913240	6.28403e+06	1.08249e+07	8.2595e+06	7.06857e+06	1.33646e+07	1.37261e+07
n/a	High	Master Protein	P49588	Alanine--tRNA ligase, cytoplasmic [OS=Homo sapiens]		0	12	11	79	11	968	106.7	5.53	49.66	metabolic process;regulation of biological process	cytoplasm;cytosol;membrane;mitochondrion	catalytic activity;metal ion binding;nucleotide binding;RNA binding	Pf01411, Pf02272, Pf07973	16	ENSG00000090861.15	AARS	16		Aminoacyl-tRNA biosynthesis	Cytosolic tRNA aminoacylation	5	2.271	100	100	100	1.57977e+08	8.20114e+07	2.0037e+08	266951	117572	7.63	18.98	8.54	38.35	131.41	1.45009e+08	1.68974e+08	1.57977e+08	8.20114e+07	1.07639e+08	7.59918e+07	1.72585e+08	2.01379e+08	2.0037e+08
n/a	High	Master Protein	P80188	Neutrophil gelatinase-associated lipocalin [OS=Homo sapiens]		0	25	4	34	4	198	22.6	8.91	35.57	cell communication;cell death;cell organization and biogenesis;cellular homeostasis;defense response;regulation of biological process;response to stimulus;transport	cytosol;extracellular;organelle lumen	metal ion binding;protein binding;transporter activity	Pf00061	3934	ENSG00000148346.11	LCN2	9			Interleukin-4 and 13 signaling; Neutrophil degranulation; Iron uptake and transport; Metal sequestration by antimicrobial proteins	10	64.055	88.083	100	100	1.56605e+06	1.2474e+07	1.94265e+06	1.13886e+06	17779.3	24.52	96.44	72.53	13	134.52	1.16741e+06	1.56605e+06	1.92924e+06	1.2474e+07	2.72124e+06	3.31646e+07	1.12297e+06	4.71078e+06	1.94265e+06
n/a	High	Master Protein	Q5JTV8	Torsin-1A-interacting protein 1 [OS=Homo sapiens]		0.001	13	7	29	7	583	66.2	8.18	13.28	cell organization and biogenesis;regulation of biological process	membrane;nucleus	enzyme regulator activity;protein binding	Pf05609	26092	ENSG00000143337.18	TOR1AIP1	1				0	100	100	100	100	1.15332e+07	1.22601e+07	3.14618e+07	525633	3758.32	15.67	23.15	17.46	30.28	135.06	1.15332e+07	1.43602e+07	1.0715e+07	1.11577e+07	1.70305e+07	1.22601e+07	2.3052e+07	3.20628e+07	3.14618e+07
n/a	High	Master Protein	P35241-1	radixin [OS=Homo sapiens]		0	23	16	82	9	583	68.5	6.37	87.73	cell organization and biogenesis;regulation of biological process;response to stimulus	cytoplasm;cytoskeleton;membrane	protein binding;RNA binding	Pf00373, Pf00769, Pf09379, Pf09380	5962	ENSG00000137710.14	RDX	11	Regulation of Actin Cytoskeleton	MicroRNAs in cancer; Regulation of actin cytoskeleton; Proteoglycans in cancer	Recycling pathway of L1	8	0.58	100	100	100	5.23283e+07	1.06031e+07	4.67725e+07	19960.2	34386.1	14.41	35.29	27.78	4.55	92.58	5.03223e+07	6.51766e+07	5.23283e+07	1.06031e+07	1.85866e+07	1.04278e+07	3.19148e+07	5.68745e+07	4.67725e+07
n/a	High	Master Protein	P40121-2	Isoform 2 of Macrophage-capping protein [OS=Homo sapiens]		0	25	8	35	8	333	36.8	7.2	20.51	cell organization and biogenesis;regulation of biological process	cytoplasm;nucleus	protein binding	Pf00626	822	ENSG00000042493.15	CAPG	2	TYROBP Causal Network			1	7.568	100	100	100	1.16949e+07	1.11145e+07	1.17777e+07	664308	87773.8	13.53	32.68	26.64	26.91	80.64	1.16949e+07	1.16696e+07	1.46508e+07	9.09297e+06	1.68788e+07	1.11145e+07	7.80481e+06	1.17777e+07	1.3552e+07
n/a	High	Master Protein	Q9Y5B9	FACT complex subunit SPT16 [OS=Homo sapiens]		0	13	11	42	11	1047	119.8	5.66	29.55	cell organization and biogenesis;metabolic process;regulation of biological process;response to stimulus	chromosome;nucleus	protein binding;RNA binding	Pf00557, Pf08512, Pf08644, Pf14826	11198	ENSG00000092201.9	SUPT16H	14			HIV elongation arrest and recovery; TP53 Regulates Transcription of DNA Repair Genes; Tat-mediated HIV elongation arrest and recovery; Formation of RNA Pol II elongation complex ; Formation of HIV elongation complex in the absence of HIV Tat; Regulation of TP53 Activity through Phosphorylation; RNA Polymerase II Pre-transcription Events; Pausing and recovery of HIV elongation; Pausing and recover…	24	20.595	100	100	100	1.11594e+08	3.15032e+07	1.27187e+08	370373	17984	21.44	28.8	27.61	47.76	51.36	7.55742e+07	1.11594e+08	1.13979e+08	2.26303e+07	4.08674e+07	3.15032e+07	7.55806e+07	1.27187e+08	1.29947e+08
n/a	High	Master Protein	P09493-5	Isoform 5 of Tropomyosin alpha-1 chain [OS=Homo sapiens]		0	44	14	119	5	245	28.4	4.77	148.93	cell organization and biogenesis;cellular component movement;regulation of biological process;response to stimulus	cytoskeleton;cytosol	protein binding;structural molecule activity	Pf00261, Pf12718	7168	ENSG00000140416.19	TPM1	15	Striated Muscle Contraction			1	2.87	100	100	100	1.06161e+08	4.27318e+07	1.53256e+08	35679.4	12430.1	17.86	27.65	27.88	64.49		7.95583e+07	1.13351e+08	1.06161e+08	3.44134e+07	5.90934e+07	4.27318e+07	9.31941e+07	1.53256e+08	1.63932e+08
n/a	High	Master Protein	P00367	Glutamate dehydrogenase 1, mitochondrial [OS=Homo sapiens]		0	17	8	50	8	558	61.4	7.8	50.85	cell organization and biogenesis;metabolic process;regulation of biological process	cytoplasm;mitochondrion;organelle lumen	catalytic activity;nucleotide binding;protein binding	Pf00208, Pf02812	2746	ENSG00000148672.8	GLUD1	10	Amino Acid metabolism; Urea cycle and metabolism of amino groups	Alanine, aspartate and glutamate metabolism; Arginine biosynthesis; Metabolic pathways; Proximal tubule bicarbonate reclamation; Nitrogen metabolism; Carbon metabolism; D-Glutamine and D-glutamate metabolism	Transcriptional activation of mitochondrial biogenesis; Amino acid synthesis and interconversion (transamination)	15	0.598	100	100	38.097	2.5211e+07	6.31796e+06	2.6719e+07	99094.6	165839	18.99	31.34	29.3	55.91		1.78211e+07	2.54446e+07	2.5211e+07	5.18968e+06	9.41093e+06	6.31796e+06	1.55811e+07	2.6719e+07	2.81508e+07
n/a	High	Master Protein	Q14247-1	Src substrate cortactin [OS=Homo sapiens]		0	21	11	69	11	550	61.5	5.4	46.58	cell organization and biogenesis;cellular component movement;regulation of biological process;transport	cytoplasm;cytoskeleton;cytosol;Golgi;membrane	protein binding	Pf00018, Pf02218, Pf07653, Pf14604	2017	ENSG00000085733.15	CTTN	11	Pathogenic Escherichia coli infection; Hepatitis C and Hepatocellular Carcinoma	Pathogenic Escherichia coli infection; Bacterial invasion of epithelial cells; Shigellosis; Proteoglycans in cancer; Tight junction	RHO GTPases activate PAKs; Clathrin-mediated endocytosis	14	100	100	100	100	8.05946e+07	1.76552e+07	8.04893e+07	95223.3		2.18	29.9	4.8	33.62		7.78754e+07	8.05946e+07	8.11105e+07	1.28962e+07	2.36804e+07	1.76552e+07	7.55377e+07	8.30634e+07	8.04893e+07
n/a	High	Master Protein	O76094	Signal recognition particle subunit SRP72 [OS=Homo sapiens]		0	22	13	45	13	671	74.6	9.26	42.51	cell organization and biogenesis;response to stimulus;transport	cytoplasm;cytosol;endoplasmic reticulum	protein binding;RNA binding	Pf08492, Pf12569, Pf12895, Pf13424, Pf14559	6731	ENSG00000174780.15	SRP72	4		Protein export	SRP-dependent cotranslational protein targeting to membrane	4	28.066	100	100	100	2.77033e+07	3.24515e+08	1.35219e+07	42454.6	1512.65	22.43	32.31	27.13	46.58	125.89	2.18888e+07	3.44411e+07	2.77033e+07	2.34017e+08	4.5034e+08	3.24515e+08	9.45115e+06	1.35219e+07	1.65811e+07
n/a	High	Master Protein	O95498-6	Isoform 6 of Vascular non-inflammatory molecule 2 [OS=Homo sapiens]		0	19	7	31	7	467	52.8	6.96	20.08	cellular component movement;metabolic process	extracellular;membrane	catalytic activity	Pf00795	8875	ENSG00000112303.13	VNN2	6				0	100	100	100	100	3.50401e+07	2.30503e+07	2.13814e+07	9.61007e+06	14363.2	20.59	29.81	21.19	7.75	134.63	2.49002e+07	3.75245e+07	3.50401e+07	1.78315e+07	3.2174e+07	2.30503e+07	1.52489e+07	2.13814e+07	2.33822e+07
n/a	High	Master Protein	P31997	carcinoembryonic antigen-related cell adhesion molecule 8 [OS=Homo sapiens]		0	17	5	66	4	349	38.1	7.39	69.81	cellular component movement;response to stimulus;transport	membrane	protein binding	Pf00047, Pf07679, Pf13895, Pf13927	1088	ENSG00000124469.11	CEACAM8	19			Neutrophil degranulation; Fibronectin matrix formation; Cell surface interactions at the vascular wall	7	100	29.016	30.077	85.693	2.37764e+06	7.02176e+06	2.46453e+06	9.87923e+06	81941.4	27.7	39.42	36.07	6.33	16.27	2.37764e+06	1.43107e+06	2.48981e+06	7.02176e+06	3.18017e+06	7.28418e+06	1.8988e+06		3.19879e+06
n/a	High	Master Protein	P53618	Coatomer subunit beta [OS=Homo sapiens]		0.001	13	10	42	10	953	107.1	6.05	13.72	transport	cytoplasm;cytosol;Golgi;membrane	protein binding;structural molecule activity	Pf01602, Pf07718, Pf14806	1315	ENSG00000129083.12	COPB1	11			COPI-dependent Golgi-to-ER retrograde traffic; Neutrophil degranulation; COPI-mediated anterograde transport	14	4.052	100	100	100	3.3641e+07	1.21049e+07	2.74986e+07	139018	34311.5	10.66	23.26	18.74	39.64	84.07	3.09195e+07	3.3641e+07	3.81424e+07	9.47952e+06	1.51729e+07	1.21049e+07	2.01776e+07	2.74986e+07	2.92239e+07
n/a	High	Master Protein	O75923-3	Isoform 3 of Dysferlin [OS=Homo sapiens]		0	5	11	34	9	2066	235.8	5.67	21.56	cell organization and biogenesis	endosome;membrane	metal ion binding;protein binding	Pf00168, Pf06398, Pf08150, Pf08151, Pf08165	8291		DYSF	2				0	100	100	100	100	8.14528e+06	9.41471e+06	1.15039e+07	298505		22.4	27.25	31.46	6.65		5.41019e+06	8.32701e+06	8.14528e+06	6.21186e+06	1.094e+07	9.41471e+06	9.02959e+06	1.66778e+07	1.15039e+07
n/a	High	Master Protein	P62280	40S ribosomal protein S11 [OS=Homo sapiens]		0	46	13	79	13	158	18.4	10.3	19.85	cell differentiation;cell organization and biogenesis;metabolic process;transport	cytoplasm;cytosol;membrane;ribosome	protein binding;RNA binding;structural molecule activity	Pf00366	6205	ENSG00000142534.6	RPS11	19	Cytoplasmic Ribosomal Proteins	Ribosome	Peptide chain elongation; Eukaryotic Translation Termination; Viral mRNA Translation; Formation of the ternary complex, and subsequently, the 43S complex; L13a-mediated translational silencing of Ceruloplasmin expression; Selenocysteine synthesis; Nonsense Mediated Decay (NMD) independent of the Exon Junction Complex (EJC); Nonsense Mediated Decay (NMD) enhanced by the Exon Junction Complex (EJC)…	38	4.277	100	100	100	3.49723e+08	7.06394e+07	3.44515e+08	241509	56466.9	19.19	30.26	25.41	17.87	100.49	2.72995e+08	4.0363e+08	3.49723e+08	5.21343e+07	9.61021e+07	7.06394e+07	2.12783e+08	3.44515e+08	3.46174e+08
n/a	High	Master Protein	P29692-2	Isoform 2 of Elongation factor 1-delta [OS=Homo sapiens]		0	11	8	54	6	647	71.4	6.42	37.18	metabolic process;regulation of biological process;response to stimulus	cytoplasm;cytosol;endoplasmic reticulum;nucleus	DNA binding;protein binding;RNA binding;signal transducer activity	Pf00736, Pf10587	1936	ENSG00000104529.17; ENSG00000273594.4	EEF1D	8; CHR_HSCHR8_3_CTG7	Translation Factors			1	19.692	100	100	100	1.80497e+08	2.79168e+07	1.02024e+08	286326	14540.2	17.75	27.88	26.51	27.95	129.02	1.32434e+08	1.80497e+08	1.86195e+08	1.88308e+07	3.36452e+07	2.79168e+07	6.57522e+07	1.02024e+08	1.13281e+08
n/a	High	Master Protein	P01040	Cystatin-A [OS=Homo sapiens]		0	67	6	43	6	98	11	5.5	33.31	cell death;cell differentiation;metabolic process;regulation of biological process	cytoplasm;cytoskeleton;cytosol	enzyme regulator activity;protein binding;structural molecule activity	Pf00031	1475	ENSG00000121552.3	CSTA	3			Formation of the cornified envelope	3	0.58	13.887	10.98	2.818	1.11667e+07	2.26574e+06	8.82912e+06	466351	804102	19.31	52.63	32.04	50.99	66.04	7.8623e+06	1.11667e+07	1.13209e+07	1.44141e+06	4.12331e+06	2.26574e+06	5.28634e+06	8.82912e+06	1.03955e+07
n/a	High	Master Protein	Q15365	Poly(RC)-binding protein 1 [OS=Homo sapiens]		0	23	7	128	5	356	37.5	7.09	91.4	metabolic process;regulation of biological process	cytoplasm;cytosol;membrane;nucleus	DNA binding;protein binding;RNA binding	Pf00013, Pf13014	5093	ENSG00000169564.6	PCBP1	2		Spliceosome	mRNA Splicing - Major Pathway	5	100	100	100	100	7.03628e+08	5.69621e+08	6.93688e+08	2.49043e+06	15165.7	26.56	29.23	31.66	15.09	130.63	4.6863e+08	7.03628e+08	8.12339e+08	4.3644e+08	7.81828e+08	5.69621e+08	3.91122e+08	6.93688e+08	7.52352e+08
n/a	High	Master Protein	Q5D862	Filaggrin-2 [OS=Homo sapiens]		0	6	8	30	8	2391	247.9	8.31	30.07	transport	cytoplasm;extracellular;nucleus	metal ion binding;structural molecule activity		388698	ENSG00000143520.6	FLG2	1			Neutrophil degranulation	3	0.939	4.178	4.539	2.639	1.37603e+06	869357	1.49524e+06	309200	329387	66.52	24.43	39.13	14.86	44.05	2.29276e+06	825842		1.00381e+06	606775	869357	1.96185e+06	1.49524e+06	844785
n/a	High	Master Protein	Q9UJZ1	Stomatin-like protein 2, mitochondrial [OS=Homo sapiens]		0	14	4	56	4	356	38.5	7.39	66.12	cell organization and biogenesis;cellular homeostasis;metabolic process;regulation of biological process;response to stimulus;transport	cytoplasm;cytoskeleton;membrane;mitochondrion	protein binding	Pf01145	30968	ENSG00000165283.15	STOML2	9			Processing of SMDT1	3	7.745	100	100	100	7.43167e+07	4.64475e+07	6.93631e+07	62226.8	8034.42	20.38	25.4	32.69	91.38	83.7	5.1119e+07	7.43167e+07	7.50933e+07	3.63935e+07	6.05594e+07	4.64475e+07	4.00878e+07	6.93631e+07	7.99227e+07
n/a	High	Master Protein	Q92621	Nuclear pore complex protein Nup205 [OS=Homo sapiens]		0	6	12	35	12	2012	227.8	6.19	36.1	cell organization and biogenesis;metabolic process;regulation of biological process;transport	membrane;nucleus	protein binding;structural molecule activity	Pf11894	23165	ENSG00000155561.14	NUP205	7		RNA transport	Rev-mediated nuclear export of HIV RNA; ISG15 antiviral mechanism; NEP/NS2 Interacts with the Cellular Export Machinery; tRNA processing in the nucleus; Transcriptional regulation by small RNAs; Nuclear Pore Complex (NPC) Disassembly; Regulation of Glucokinase by Glucokinase Regulatory Protein; Vpr-mediated nuclear import of PICs; Regulation of HSF1-mediated heat shock response; snRNP Assembly; S…	64	8.648	100	100	100	2.68257e+07	1.90187e+07	2.42258e+07	561732	64955.9	17.66	34.34	31.09	27.44	89.38	2.07941e+07	2.68257e+07	2.9716e+07	1.02801e+07	1.90187e+07	2.1208e+07	1.6598e+07	3.16109e+07	2.42258e+07
n/a	High	Master Protein	P04792	Heat shock protein beta-1 [OS=Homo sapiens]		0	37	7	61	7	205	22.8	6.4	70.95	cellular component movement;metabolic process;regulation of biological process;response to stimulus	cytoplasm;cytoskeleton;cytosol;membrane;nucleus;proteasome	enzyme regulator activity;protein binding;RNA binding	Pf00011	3315	ENSG00000106211.8	HSPB1	7	Apoptosis-related network due to altered Notch3 in ovarian cancer; Fas Ligand (FasL) pathway and Stress induction of Heat Shock Proteins (HSP) regulation; MAPK Signaling Pathway; ATM Signaling Network in Development and Disease; VEGFA-VEGFR2 Signaling Pathway; p38 MAPK Signaling Pathway	VEGF signaling pathway; Epstein-Barr virus infection; MAPK signaling pathway; Amoebiasis	AUF1 (hnRNP D0) binds and destabilizes mRNA; VEGFA-VEGFR2 Pathway; MAPK6/MAPK4 signaling	19	0.602	100	100	100	3.69681e+07	2.0316e+07	5.21834e+07	57028.5	94756.5	8.45	38.03	22.63	26.45	119.13	3.66486e+07	4.24613e+07	3.69681e+07	1.5157e+07	3.18188e+07	2.0316e+07	3.42782e+07	5.21834e+07	5.27405e+07
n/a	High	Master Protein	E9PAV3	Nascent polypeptide-associated complex subunit alpha, muscle-specific form [OS=Homo sapiens]		0	2	3	31	3	2078	205.3	9.58	37.43	metabolic process;regulation of biological process	cytoplasm;nucleus	DNA binding	Pf01849	4666	ENSG00000196531.10	NACA	12				0	2.702	100	100	100	6.33639e+06	3.42887e+06	7.20418e+06	39898.7	14765.4	28.11	55.1	46.02		133.78	3.97394e+06	6.33639e+06	7.10496e+06	2.79427e+06	7.41575e+06	3.42887e+06	2.96147e+06	7.20418e+06	8.3565e+06
n/a	High	Master Protein	P61221	ATP-binding cassette sub-family E member 1 [OS=Homo sapiens]		0	15	10	104	10	599	67.3	8.34	68.95	cell organization and biogenesis;metabolic process;regulation of biological process;transport	cytoplasm;cytosol;membrane;mitochondrion;organelle lumen	catalytic activity;enzyme regulator activity;metal ion binding;nucleotide binding;protein binding	Pf00005, Pf04068, Pf13304, Pf13671	6059	ENSG00000164163.10	ABCE1	4			Interferon alpha/beta signaling	4	4.871	100	100	100	9.17539e+07	3.59641e+07	6.17563e+07	191344	39278.3	12	16.3	24.88	14.37	36.81	7.95454e+07	9.17539e+07	1.01303e+08	2.98555e+07	4.15138e+07	3.59641e+07	4.05836e+07	6.17563e+07	6.71992e+07
n/a	High	Master Protein	Q92499	ATP-dependent RNA helicase DDX1 [OS=Homo sapiens]		0	9	5	61	5	740	82.4	7.23	51.62	cell organization and biogenesis;development;metabolic process;regulation of biological process;response to stimulus	cytoplasm;cytosol;membrane;nucleus	catalytic activity;DNA binding;nucleotide binding;protein binding;RNA binding	Pf00270, Pf00271, Pf00622	1653	ENSG00000079785.14	DDX1	2	DDX1 as a regulatory component of the Drosha microprocessor; mRNA Processing		tRNA processing in the nucleus	5	4.749	100	100	100	5.98244e+07	3.52821e+07	5.89603e+07	32907.3	6928.74	18.57	24.21	30.93	92.54	42.44	4.27166e+07	6.05639e+07	5.98244e+07	2.95111e+07	4.72371e+07	3.52821e+07	3.44815e+07	5.89603e+07	6.56247e+07
n/a	High	Master Protein	Q14152	Eukaryotic translation initiation factor 3 subunit A [OS=Homo sapiens]		0	14	20	59	20	1382	166.5	6.79	17.19	cell organization and biogenesis;metabolic process;regulation of biological process	cytoplasm;cytosol;membrane;nucleus	protein binding;RNA binding;structural molecule activity	Pf01399	8661	ENSG00000107581.12	EIF3A	10	Translation Factors	RNA transport	Formation of the ternary complex, and subsequently, the 43S complex; L13a-mediated translational silencing of Ceruloplasmin expression; Translation initiation complex formation; GTP hydrolysis and joining of the 60S ribosomal subunit; Formation of a pool of free 40S subunits; Ribosomal scanning and start codon recognition	13	0.964	100	100	100	1.59289e+08	8.51478e+07	1.12166e+08	64016.7	66380.3	5.94	20.6	20.46	41.51	109.35	1.55409e+08	1.59289e+08	1.73759e+08	8.06362e+07	1.16201e+08	8.51478e+07	8.06735e+07	1.21648e+08	1.12166e+08
n/a	High	Master Protein	P52209	6-phosphogluconate dehydrogenase, decarboxylating [OS=Homo sapiens]		0	24	10	78	10	483	53.1	7.23	57.69	metabolic process	cytoplasm;cytosol;nucleus	catalytic activity	Pf00393, Pf03446	5226	ENSG00000142657.20	PGD	1	Pentose Phosphate Pathway; NRF2 pathway	Carbon metabolism; Metabolic pathways; Glutathione metabolism; Pentose phosphate pathway	Pentose phosphate pathway (hexose monophosphate shunt)	9	17.144	100	100	100	2.95121e+07	1.57735e+07	2.95448e+07	2.05675e+06	119966	22.84	37	31.57	13.81	43.6	1.9981e+07	3.15332e+07	2.95121e+07	1.09197e+07	2.31211e+07	1.57735e+07	1.62716e+07	3.08578e+07	2.95448e+07
n/a	High	Master Protein	P14868	Aspartate--tRNA ligase, cytoplasmic [OS=Homo sapiens]		0	22	10	68	10	501	57.1	6.55	44.81	cell organization and biogenesis;metabolic process	cytoplasm;cytosol;membrane	catalytic activity;nucleotide binding;protein binding;RNA binding	Pf00152, Pf01336	1615	ENSG00000115866.10	DARS	2	Alanine and aspartate metabolism	Aminoacyl-tRNA biosynthesis	Cytosolic tRNA aminoacylation; SeMet incorporation into proteins	10	13.297	100	100	100	8.33675e+07	2.92352e+07	5.01458e+07	110927	8342.54	12.76	38.91	28.74	12.03	111.78	7.06488e+07	9.13334e+07	8.33675e+07	2.4244e+07	4.94568e+07	2.92352e+07	2.89368e+07	5.08223e+07	5.01458e+07
n/a	High	Master Protein	O00160	Unconventional myosin-If [OS=Homo sapiens]		0	11	14	64	9	1098	124.8	9.11	49.29			catalytic activity;motor activity;nucleotide binding;protein binding	Pf00018, Pf00063, Pf06017, Pf07653, Pf14604	4542	ENSG00000142347.16	MYO1F	19				0	10.987	100	100	100	1.23465e+08	5.44848e+07	1.10446e+08	87958.9	8005.66	17.58	35	27.28	31.46	72.61	9.29808e+07	1.23465e+08	1.31726e+08	4.10312e+07	8.15922e+07	5.44848e+07	6.69906e+07	1.10446e+08	1.15376e+08
n/a	High	Master Protein	P15531	Nucleoside diphosphate kinase A [OS=Homo sapiens]		0	53	7	44	4	152	17.1	6.19	17.91	cell differentiation;cellular homeostasis;metabolic process;regulation of biological process;response to stimulus;transport	cytoplasm;cytosol;membrane;mitochondrion;nucleus	catalytic activity;DNA binding;metal ion binding;nucleotide binding;protein binding;RNA binding	Pf00334	4830	ENSG00000239672.7	NME1	17		Metabolic pathways; Pyrimidine metabolism; Purine metabolism	Interconversion of nucleotide di- and triphosphates	6	0.775	100	100	100	4.49072e+07	1.57094e+07	5.61159e+07	88339.9	113992	20.67	19.54	33.34	29.74	142.09	4.36035e+07	4.49072e+07	6.22095e+07	1.18952e+07	1.57094e+07	1.77031e+07	3.17105e+07	6.41381e+07	5.61159e+07
n/a	High	Master Protein	P16403	Histone H1.2 [OS=Homo sapiens]		0	24	6	76	5	213	21.4	10.93	42.53	cell organization and biogenesis;metabolic process;regulation of biological process	chromosome;nucleus	DNA binding;protein binding;RNA binding	Pf00538	3006	ENSG00000187837.3	HIST1H1C	6			Formation of Senescence-Associated Heterochromatin Foci (SAHF); Activation of DNA fragmentation factor	10	50.455	100	100	100	5.16721e+08	5.29059e+07	3.62836e+08	1.20143e+06	23812	22.52	24.51	27.03	13.9	87.39	3.89246e+08	6.17476e+08	5.16721e+08	4.33287e+07	7.01491e+07	5.29059e+07	2.3051e+08	3.62836e+08	4.01375e+08
n/a	High	Master Protein	P49915	GMP synthase [glutamine-hydrolyzing] [OS=Homo sapiens]		0	14	11	53	11	693	76.7	6.87	67.69	metabolic process	cytoplasm;cytosol	catalytic activity;nucleotide binding	Pf00117, Pf00733, Pf00958, Pf01171, Pf02540, Pf03054, Pf06508, Pf07722	8833	ENSG00000163655.15	GMPS	3		Purine metabolism; Metabolic pathways; Drug metabolism - other enzymes	Purine ribonucleoside monophosphate biosynthesis	7	9.037	100	100	100	3.48802e+07	3.78337e+06	1.37243e+07	70992.6	7855.65	6.13	25.96	12.32	64.67	117.2	3.48802e+07	3.32003e+07	3.74824e+07	3.78337e+06	5.03022e+06	3.00317e+06	1.11108e+07	1.37243e+07	1.40016e+07
n/a	High	Master Protein	P61513	60S ribosomal protein L37a [OS=Homo sapiens]		0	52	5	63	5	92	10.3	10.43	70.14	cell organization and biogenesis;metabolic process;transport	cytosol;nucleus;ribosome	metal ion binding;protein binding;RNA binding;structural molecule activity	Pf01780	6168	ENSG00000197756.9	RPL37A	2	Cytoplasmic Ribosomal Proteins	Ribosome	Peptide chain elongation; Eukaryotic Translation Termination; Viral mRNA Translation; L13a-mediated translational silencing of Ceruloplasmin expression; Nonsense Mediated Decay (NMD) independent of the Exon Junction Complex (EJC); Selenocysteine synthesis; Nonsense Mediated Decay (NMD) enhanced by the Exon Junction Complex (EJC); GTP hydrolysis and joining of the 60S ribosomal subunit; Major path…	34	2.095	100	100	100	8.55787e+07	1.02744e+07	9.17838e+07	41725.9	19912.6	47.86	7.68	16.02		98.72	1.08104e+08	3.63448e+07	8.55787e+07	1.14616e+07	1.02744e+07	9.91366e+06	1.08286e+08	9.17838e+07	7.85863e+07
n/a	High	Master Protein	Q01469	Fatty acid-binding protein, epidermal [OS=Homo sapiens]		0	45	7	39	7	135	15.2	7.01	24.77	metabolic process;transport	cytoplasm;cytosol;extracellular;membrane;organelle lumen	protein binding;transporter activity	Pf00061	2171	ENSG00000164687.10	FABP5	8	PPAR signaling pathway	PPAR signaling pathway	Triglyceride catabolism; Signaling by Retinoic Acid; Neutrophil degranulation	12	1.075	8.384	9.183	15.741	2.27404e+06	4.26947e+06	2.49064e+06	291571	271233	45.24	25.94	40.54	37.99	91.61	4.07526e+06	1.74688e+06	2.27404e+06	2.90334e+06	4.96693e+06	4.26947e+06	2.49064e+06	2.15083e+06	4.42155e+06
n/a	High	Master Protein	Q07020	60S ribosomal protein L18 [OS=Homo sapiens]		0	34	10	63	10	188	21.6	11.72	48.02	cell organization and biogenesis;metabolic process;transport	cytoplasm;cytosol;endoplasmic reticulum;membrane;nucleus;ribosome	RNA binding;structural molecule activity	Pf00828	6141	ENSG00000063177.12	RPL18	19	Cytoplasmic Ribosomal Proteins	Ribosome	Peptide chain elongation; Eukaryotic Translation Termination; Viral mRNA Translation; L13a-mediated translational silencing of Ceruloplasmin expression; Nonsense Mediated Decay (NMD) independent of the Exon Junction Complex (EJC); Selenocysteine synthesis; Nonsense Mediated Decay (NMD) enhanced by the Exon Junction Complex (EJC); GTP hydrolysis and joining of the 60S ribosomal subunit; Major path…	34	6.74	100	100	100	2.45034e+08	7.40425e+07	2.72273e+08	465586	69075.5	16.88	37.65	21.64	117.66	86.42	1.85153e+08	2.57527e+08	2.45034e+08	5.04387e+07	1.0859e+08	7.40425e+07	1.85733e+08	2.72273e+08	2.83482e+08
n/a	High	Master Protein	Q9Y2X3	Nucleolar protein 58 [OS=Homo sapiens]		0	16	9	54	9	529	59.5	8.92	38.82	cell growth;metabolic process	cytosol;membrane;nucleus	protein binding;RNA binding	Pf01798, Pf08060, Pf08156	51602	ENSG00000055044.10	NOP58	2		Ribosome biogenesis in eukaryotes	Major pathway of rRNA processing in the nucleolus and cytosol; rRNA modification in the nucleus and cytosol; SUMOylation of RNA binding proteins	11	0.01	100	100	100	5.69212e+07	2.01004e+07	6.37863e+07		14467.3	12.32	35.72	30.06		8.35	4.81046e+07	5.69212e+07	6.15797e+07	1.72078e+07	3.29174e+07	2.01004e+07	3.67087e+07	6.37863e+07	6.76119e+07
n/a	High	Master Protein	P46779	60S ribosomal protein L28 [OS=Homo sapiens]		0	42	8	94	8	137	15.7	12.02	40.01	cell organization and biogenesis;metabolic process;regulation of biological process;transport	cytosol;membrane;ribosome	protein binding;RNA binding;structural molecule activity	Pf01778	6158	ENSG00000108107.14	RPL28	19	Cytoplasmic Ribosomal Proteins	Ribosome	Peptide chain elongation; Eukaryotic Translation Termination; Viral mRNA Translation; L13a-mediated translational silencing of Ceruloplasmin expression; Nonsense Mediated Decay (NMD) independent of the Exon Junction Complex (EJC); Selenocysteine synthesis; Nonsense Mediated Decay (NMD) enhanced by the Exon Junction Complex (EJC); GTP hydrolysis and joining of the 60S ribosomal subunit; Major path…	34	9.35	100	100	100	4.4327e+08	1.597e+08	4.26168e+08	220539	23587.3	7.13	29.06	12.32	45.73	82.55	4.09392e+08	4.72349e+08	4.4327e+08	1.26884e+08	2.24119e+08	1.597e+08	3.5874e+08	4.5888e+08	4.26168e+08
n/a	High	Master Protein	P60900	Proteasome subunit alpha type-6 [OS=Homo sapiens]		0	34	8	73	8	246	27.4	6.76	55.14	metabolic process;regulation of biological process;response to stimulus;transport	cytoplasm;cytosol;nucleus;proteasome	catalytic activity;nucleotide binding;protein binding;RNA binding	Pf00227, Pf10584	5687	ENSG00000100902.10	PSMA6	14	Proteasome Degradation	Proteasome	Regulation of RAS by GAPs; CDT1 association with the CDC6:ORC:origin complex; Downstream TCR signaling; UCH proteinases; NIK-->noncanonical NF-kB signaling; Hh mutants that don't undergo autocatalytic processing are degraded by ERAD; SCF-beta-TrCP mediated degradation of Emi1; Cross-presentation of soluble exogenous antigens (endosomes); Separation of Sister Chromatids; Vpu mediated degradation o…	150	7.94	100	100	100	5.58671e+07	2.41485e+07	3.54665e+07	161952	20397.5	22.72	25.26	44.41	14.84	134.13	4.05701e+07	5.58671e+07	6.46891e+07	1.85462e+07	3.09252e+07	2.41485e+07	1.96825e+07	3.54665e+07	5.11566e+07
n/a	High	Master Protein	P43490	nicotinamide phosphoribosyltransferase [OS=Homo sapiens]		0.001	22	10	35	10	491	55.5	7.15	14.59	cell communication;metabolic process;regulation of biological process;response to stimulus	cytoplasm;cytosol;extracellular;nucleus	catalytic activity;protein binding	Pf04095	10135	ENSG00000105835.11	NAMPT	7	Adipogenesis; NAD metabolism, sirtuins and aging; NAD+ metabolism; NAD+ biosynthetic pathways	Nicotinate and nicotinamide metabolism; NOD-like receptor signaling pathway; Metabolic pathways	BMAL1:CLOCK,NPAS2 activates circadian gene expression; Nicotinamide salvaging	14	54.92	100	100	100	6.17247e+06	9.78956e+06	1.04763e+06	321971	5862.53	16.94	26.74	30.5	6.61		4.5374e+06	6.17247e+06	6.21044e+06	8.30271e+06	1.37988e+07	9.78956e+06	580425	1.05973e+06	1.04763e+06
n/a	High	Master Protein	Q15717	ELAV-like protein 1 [OS=Homo sapiens]		0	29	8	66	8	326	36.1	9.17	46.4	development;metabolic process;regulation of biological process	cytoplasm;cytosol;membrane;nucleus	protein binding;RNA binding	Pf00076, Pf13893, Pf14259	1994	ENSG00000066044.14	ELAVL1	19	AMP-activated Protein Kinase (AMPK) Signaling; Endoderm Differentiation; Preimplantation Embryo; Focal Adhesion-PI3K-Akt-mTOR-signaling pathway	AMPK signaling pathway	HuR (ELAVL1) binds and stabilizes mRNA; mRNA Splicing - Major Pathway	11	0.01	14.341	15.608	4.434	5.68371e+07	1.75751e+07	6.18602e+07	29506.7	3.96337e+06	13.02	26.98	20.13	29.52	13.32	4.62263e+07	5.96051e+07	5.68371e+07	1.41464e+07	2.4022e+07	1.75751e+07	4.34623e+07	6.18602e+07	6.42551e+07
n/a	High	Master Protein	Q9UHB6	LIM domain and actin-binding protein 1 [OS=Homo sapiens]		0	9	8	56	8	759	85.2	6.84	26.31	cell organization and biogenesis;regulation of biological process	cytoplasm;cytoskeleton	metal ion binding;protein binding	Pf00412	51474	ENSG00000050405.13	LIMA1	12				0	3.211	100	100	100	1.09966e+08	3.69847e+07	1.97675e+08	50403	15696.8	12.12	27.78	21.04	38.9	44.76	1.09966e+08	1.05122e+08	1.31421e+08	2.92645e+07	5.06419e+07	3.69847e+07	1.35084e+08	2.02216e+08	1.97675e+08
n/a	High	Master Protein	P08708	40S ribosomal protein S17 [OS=Homo sapiens]		0	61	7	38	7	135	15.5	9.85	26.31	cell organization and biogenesis;metabolic process;transport	cytosol;membrane;ribosome	RNA binding;structural molecule activity	Pf00833	6218	ENSG00000278229.2; ENSG00000182774.10	RPS17; RPS17L	15; CHR_HSCHR15_5_CTG8	Cytoplasmic Ribosomal Proteins	Ribosome	Peptide chain elongation; Eukaryotic Translation Termination; Viral mRNA Translation; Formation of the ternary complex, and subsequently, the 43S complex; L13a-mediated translational silencing of Ceruloplasmin expression; Selenocysteine synthesis; Nonsense Mediated Decay (NMD) independent of the Exon Junction Complex (EJC); Nonsense Mediated Decay (NMD) enhanced by the Exon Junction Complex (EJC)…	38	0.227	100	100	100	5.61669e+07	3.79777e+07	7.05942e+07	4929.79	21686	28.44	13.21	19.67	142.97	147.48	5.61669e+07	4.0123e+07	7.2044e+07	3.30499e+07	4.31021e+07	3.79777e+07	4.9415e+07	7.05942e+07	7.17557e+07
n/a	High	Master Protein	P19878	Neutrophil cytosol factor 2 [OS=Homo sapiens]		0	25	12	48	12	526	59.7	6.16	20.98	cellular homeostasis;defense response;metabolic process;regulation of biological process;response to stimulus;transport	cytoplasm;cytosol;vacuole	catalytic activity;enzyme regulator activity;protein binding	Pf00018, Pf00515, Pf00564, Pf07653, Pf07719, Pf13181, Pf13414, Pf13424, Pf14604	4688	ENSG00000116701.14	NCF2	1	Brain-Derived Neurotrophic Factor (BDNF) signaling pathway; VEGFA-VEGFR2 Signaling Pathway; Microglia Pathogen Phagocytosis Pathway; TYROBP Causal Network	Leukocyte transendothelial migration; Osteoclast differentiation; Leishmaniasis; Phagosome	ROS, RNS production in phagocytes; Cross-presentation of particulate exogenous antigens (phagosomes); VEGFA-VEGFR2 Pathway; Detoxification of Reactive Oxygen Species; RHO GTPases Activate NADPH Oxidases	25	100	100	100	100	2.19168e+07	2.24817e+07	1.61466e+07	653084	6437.65	23.94	25.82	17.67	10.29		1.39326e+07	2.19168e+07	2.19206e+07	1.85455e+07	3.0639e+07	2.24817e+07	1.18065e+07	1.65188e+07	1.61466e+07
n/a	High	Master Protein	P08648	Integrin alpha-5 [OS=Homo sapiens]		0	8	7	66	7	1049	114.5	5.77	40.93	cell differentiation;cell organization and biogenesis;cellular component movement;regulation of biological process;response to stimulus	cell surface;cytoplasm;endoplasmic reticulum;Golgi;membrane	metal ion binding;protein binding;receptor activity	Pf01839, Pf08441	3678	ENSG00000161638.10	ITGA5	12	Integrin-mediated Cell Adhesion; Arrhythmogenic Right Ventricular Cardiomyopathy; Focal Adhesion; Focal Adhesion-PI3K-Akt-mTOR-signaling pathway	Hypertrophic cardiomyopathy (HCM); Proteoglycans in cancer; MicroRNAs in cancer; ECM-receptor interaction; Phagosome; Dilated cardiomyopathy; Regulation of actin cytoskeleton; Focal adhesion; Shigellosis; Pertussis; PI3K-Akt signaling pathway; Hematopoietic cell lineage; Bacterial invasion of epithelial cells; Arrhythmogenic right ventricular cardiomyopathy (ARVC)	RUNX2 regulates genes involved in cell migration; Integrin cell surface interactions; Signal transduction by L1; Elastic fibre formation; Fibronectin matrix formation; Cell surface interactions at the vascular wall	33	25.226	100	100	100	1.52855e+08	2.17131e+07	1.03494e+08	193404	7666.9	21.6	24.93	53.53	51.15	63.51	1.03663e+08	1.57429e+08	1.52855e+08	1.75869e+07	2.8775e+07	2.17131e+07	6.13298e+07	1.03494e+08	1.83769e+08
n/a	High	Master Protein	Q07157-2	Isoform Short of Tight junction protein ZO-1 [OS=Homo sapiens]		0	11	18	110	18	1668	186.9	6.79	70.43	cell communication;cell organization and biogenesis;regulation of biological process;response to stimulus	cytoplasm;cytosol;membrane	protein binding	Pf00018, Pf00595, Pf00625, Pf00791, Pf07653, Pf13180	7082	ENSG00000104067.16	TJP1	15				0	1.386	100	100	100	1.0638e+08	2.05066e+07	9.87967e+07	218266	157425	18.15	30.36	19.86	33.5	56.8	8.02266e+07	1.0638e+08	1.1542e+08	2.05066e+07	3.35349e+07	2.04482e+07	7.22938e+07	9.87967e+07	1.07815e+08
n/a	High	Master Protein	P04844-1	Dolichyl-diphosphooligosaccharide--protein glycosyltransferase subunit 2 [OS=Homo sapiens]		0	19	8	37	8	631	69.2	5.69	27.35	metabolic process;response to stimulus	endoplasmic reticulum;membrane	catalytic activity;protein binding	Pf05817	6185	ENSG00000118705.16	RPN2	20	Proteasome Degradation	Metabolic pathways; N-Glycan biosynthesis; Protein processing in endoplasmic reticulum	Asparagine N-linked glycosylation; SRP-dependent cotranslational protein targeting to membrane	9	6.324	100	100	100	1.30319e+07	5.57283e+06	1.76572e+07	75641.4	11960.6	23.88	22.88	29.16	18.85	98.9	8.47398e+06	1.35372e+07	1.30319e+07	4.59651e+06	7.22109e+06	5.57283e+06	1.04474e+07	1.89177e+07	1.76572e+07
n/a	High	Master Protein	P11047	Laminin subunit gamma-1 [OS=Homo sapiens]		0	6	10	47	10	1609	177.5	5.12	29.12	cell organization and biogenesis;cellular component movement;metabolic process;regulation of biological process	extracellular;organelle lumen	catalytic activity;motor activity;protein binding;structural molecule activity	Pf00052, Pf00053, Pf00055, Pf00261, Pf01576, Pf05262, Pf05483, Pf05557, Pf05667, Pf05701, Pf06008, Pf08317, Pf10174, Pf11068, Pf12128, Pf12795, Pf13166, Pf13514, Pf13868	3915	ENSG00000135862.5	LAMC1	1	Alpha 6 Beta 4 signaling pathway; Endoderm Differentiation; miRNA targets in ECM and membrane receptors; Focal Adhesion; Focal Adhesion-PI3K-Akt-mTOR-signaling pathway; Inflammatory Response Pathway	Small cell lung cancer; Prion diseases; Toxoplasmosis; ECM-receptor interaction; Focal adhesion; Pathways in cancer; Amoebiasis; PI3K-Akt signaling pathway	ECM proteoglycans; Post-translational protein phosphorylation; Regulation of Insulin-like Growth Factor (IGF) transport and uptake by Insulin-like Growth Factor Binding Proteins (IGFBPs); L1CAM interactions; Laminin interactions; Degradation of the extracellular matrix; MET activates PTK2 signaling; Non-integrin membrane-ECM interactions	31	0.73	100	100	100	2.697e+07	1.66983e+07	5.1498e+07	19809.6	27154.4	16.17	30.77	19.49	46.4	90.16	2.14613e+07	2.697e+07	2.97357e+07	1.33113e+07	2.41721e+07	1.66983e+07	3.93656e+07	5.85624e+07	5.1498e+07
n/a	High	Master Protein	P40429	60S ribosomal protein L13a [OS=Homo sapiens]		0	45	11	68	11	203	23.6	10.93	28.89	cell organization and biogenesis;metabolic process;regulation of biological process;response to stimulus;transport	cytoplasm;cytosol;membrane;nucleus;ribosome	RNA binding;structural molecule activity	Pf00572	23521	ENSG00000142541.16	RPL13A	19	Cytoplasmic Ribosomal Proteins	Ribosome	Peptide chain elongation; Eukaryotic Translation Termination; Viral mRNA Translation; L13a-mediated translational silencing of Ceruloplasmin expression; Nonsense Mediated Decay (NMD) independent of the Exon Junction Complex (EJC); Selenocysteine synthesis; Nonsense Mediated Decay (NMD) enhanced by the Exon Junction Complex (EJC); GTP hydrolysis and joining of the 60S ribosomal subunit; Major path…	34	0.044	100	100	99.702	2.27064e+08	1.03541e+08	2.74249e+08	45418.8	1.03851e+06	16.69	22.3	23.92	72.49	40.97	1.78835e+08	2.50445e+08	2.27064e+08	7.78549e+07	1.22951e+08	1.03541e+08	1.78569e+08	2.74249e+08	2.85904e+08
n/a	High	Master Protein	P09382	Galectin-1 [OS=Homo sapiens]		0	33	4	65	4	135	14.7	5.5	65.87	cell death;cell differentiation;cellular homeostasis;metabolic process;regulation of biological process;response to stimulus	cell surface;cytoplasm;cytosol;extracellular;nucleus;organelle lumen	protein binding;RNA binding;signal transducer activity	Pf00337	3956	ENSG00000100097.11	LGALS1	22			Post-translational protein phosphorylation; Regulation of Insulin-like Growth Factor (IGF) transport and uptake by Insulin-like Growth Factor Binding Proteins (IGFBPs)	4	0.28	65.199	97.583	75.13	4.58044e+07	5.2781e+07	6.8555e+07	196371	702532	5.61	7.87	13.18	16.16	10.36	4.21076e+07	4.69323e+07	4.58044e+07	5.2781e+07	4.63431e+07	5.37094e+07	6.8555e+07	6.89737e+07	5.4184e+07
n/a	High	Master Protein	P84095	Rho-related GTP-binding protein RhoG [OS=Homo sapiens]		0	38	7	51	6	191	21.3	8.12	41.02	cell organization and biogenesis;cellular component movement;regulation of biological process;response to stimulus;transport	cytosol;membrane	catalytic activity;nucleotide binding;protein binding	Pf00025, Pf00071, Pf04670, Pf08477	391	ENSG00000177105.9	RHOG	11	Brain-Derived Neurotrophic Factor (BDNF) signaling pathway	Shigellosis; Bacterial invasion of epithelial cells; Salmonella infection	G alpha (12/13) signalling events; Neutrophil degranulation; RHO GTPases activate KTN1; GPVI-mediated activation cascade; Sema4D induced cell migration and growth-cone collapse; Rho GTPase cycle	23	3.303	63.068	46.309	35.461	5.80258e+06	3.26255e+06	4.26062e+06	303931	92004.9	30.18	50.47	22.06	25.69		7.1532e+06	5.80258e+06	3.8025e+06	5.39269e+06	1.87567e+06	3.26255e+06	4.26062e+06	5.69025e+06	3.74645e+06
n/a	High	Master Protein	Q9UMS4	Pre-mRNA-processing factor 19 [OS=Homo sapiens]		0	17	6	46	6	504	55.1	6.61	35.71	cell organization and biogenesis;cell proliferation;metabolic process;regulation of biological process;response to stimulus	cytoplasm;cytoskeleton;membrane;nucleus;spliceosomal complex	catalytic activity;metal ion binding;protein binding	Pf00400, Pf04564, Pf08606, Pf11789	27339	ENSG00000110107.8	PRPF19	11		Ubiquitin mediated proteolysis; Spliceosome	Dual incision in TC-NER; Formation of TC-NER Pre-Incision Complex; mRNA Splicing - Major Pathway; Gap-filling DNA repair synthesis and ligation in TC-NER	12		100	100	100	2.05327e+07	3.04162e+06	1.37424e+07			34.43	39.93	18.72			2.05327e+07	1.2806e+07	2.65065e+07	3.04162e+06	4.96237e+06	2.3046e+06	1.0855e+07	1.37424e+07	1.58906e+07
n/a	High	Master Protein	P61353	60S ribosomal protein L27 [OS=Homo sapiens]		0.001	33	6	52	6	136	15.8	10.56	11.58	cell organization and biogenesis;metabolic process;transport	cytosol;membrane;nucleus;ribosome	RNA binding;structural molecule activity	Pf00467, Pf01777	6155	ENSG00000131469.12	RPL27	17	Cytoplasmic Ribosomal Proteins	Ribosome	Peptide chain elongation; Eukaryotic Translation Termination; Viral mRNA Translation; L13a-mediated translational silencing of Ceruloplasmin expression; Nonsense Mediated Decay (NMD) independent of the Exon Junction Complex (EJC); Selenocysteine synthesis; Nonsense Mediated Decay (NMD) enhanced by the Exon Junction Complex (EJC); GTP hydrolysis and joining of the 60S ribosomal subunit; Major path…	34	0.468	100	100	100	7.8638e+07	2.35821e+07	1.01214e+08	13744.2	29397	12.73	37.04	15.65	1.15	120.45	9.00902e+07	6.99058e+07	7.8638e+07	1.37578e+07	3.03921e+07	2.35821e+07	1.01214e+08	1.09437e+08	8.00435e+07
n/a	High	Master Protein	P25205-2	Isoform 2 of DNA replication licensing factor MCM3 [OS=Homo sapiens]		0	13	12	70	12	853	95.8	5.77	33.87	metabolic process	membrane;nucleus	catalytic activity;DNA binding;nucleotide binding;protein binding	Pf00493, Pf01078, Pf07728, Pf14551	4172	ENSG00000112118.18	MCM3	6	Cell Cycle; Retinoblastoma (RB) in Cancer; G1 to S cell cycle control; DNA Replication			4	16.697	100	100	100	6.27803e+07	2.44653e+07	6.43198e+07	262823	15741	15.87	14.37	17.28	138.53	107.18	6.27803e+07	5.85752e+07	7.86415e+07	2.15299e+07	2.86442e+07	2.44653e+07	4.85039e+07	6.81746e+07	6.43198e+07
n/a	High	Master Protein	P53396-2	Isoform 2 of ATP-citrate synthase [OS=Homo sapiens]		0	14	15	47	15	1091	119.7	7.33	23.27	metabolic process;regulation of biological process;transport	cytoplasm;cytosol;extracellular;membrane;organelle lumen	catalytic activity;metal ion binding;nucleotide binding;protein binding	Pf00285, Pf00549, Pf02629, Pf08442	47	ENSG00000131473.16	ACLY	17	Sterol Regulatory Element-Binding Proteins (SREBP) signalling; TCA Cycle and Deficiency of Pyruvate Dehydrogenase complex (PDHc); Fatty Acid Biosynthesis; Amino Acid metabolism			4	45.29	100	100	100	1.09729e+08	3.29444e+07	7.00164e+07	6.92494e+06	152901	23.68	25.42	23.06	26.99	44.23	7.94773e+07	1.29411e+08	1.09729e+08	2.69372e+07	4.43228e+07	3.29444e+07	4.5954e+07	7.17824e+07	7.00164e+07
n/a	High	Master Protein	P62829	60S ribosomal protein L23 [OS=Homo sapiens]		0	39	6	92	6	140	14.9	10.51	28.15	cell organization and biogenesis;metabolic process;regulation of biological process;response to stimulus;transport	cytoplasm;cytosol;membrane;ribosome	protein binding;RNA binding;structural molecule activity	Pf00238	9349	ENSG00000125691.12	RPL23	17	Cytoplasmic Ribosomal Proteins	Ribosome	Peptide chain elongation; Eukaryotic Translation Termination; Viral mRNA Translation; L13a-mediated translational silencing of Ceruloplasmin expression; Nonsense Mediated Decay (NMD) independent of the Exon Junction Complex (EJC); Selenocysteine synthesis; Nonsense Mediated Decay (NMD) enhanced by the Exon Junction Complex (EJC); GTP hydrolysis and joining of the 60S ribosomal subunit; Major path…	34	21.032	100	100	100	6.96495e+08	5.55553e+07	6.37326e+08	494500	23511.8	17.98	33.81	42.53	34.4	142.71	5.34571e+08	7.68548e+08	6.96495e+08	3.85557e+07	7.70497e+07	5.55553e+07	2.86106e+08	6.37326e+08	7.30961e+08
n/a	High	Master Protein	P62937	peptidyl-prolyl cis-trans isomerase A [OS=Homo sapiens]		0	44	6	35	6	165	18	7.81	17.86	cell organization and biogenesis;cellular component movement;metabolic process;regulation of biological process;response to stimulus;transport	cytoplasm;cytosol;extracellular;membrane;nucleus;organelle lumen	catalytic activity;protein binding;RNA binding	Pf00160	5478	ENSG00000196262.13	PPIA	7	Prolactin Signaling Pathway		Budding and maturation of HIV virion; Gene and protein expression by JAK-STAT signaling after Interleukin-12 stimulation; Minus-strand DNA synthesis; Binding and entry of HIV virion; Basigin interactions; APOBEC3G mediated resistance to HIV-1 infection; Uncoating of the HIV Virion; Calcineurin activates NFAT; Platelet degranulation ; Plus-strand DNA synthesis; Integration of provirus; Neutrophil …	34	3.865	100	100	100	1.12332e+08	7.26098e+07	1.26673e+08	224962	58212.3	19.57	33.51	30.57	4.39	72.28	7.9981e+07	1.12332e+08	1.17071e+08	5.12459e+07	1.01383e+08	7.26098e+07	7.22845e+07	1.26673e+08	1.34893e+08
n/a	High	Master Protein	P31944	Caspase-14 [OS=Homo sapiens]		0	26	7	45	7	242	27.7	5.58	41.47	cell death;cell differentiation;metabolic process	cytoplasm;cytosol;nucleus	catalytic activity;protein binding	Pf00656	23581	ENSG00000105141.5	CASP14	19			Formation of the cornified envelope	3	0.795	5.331	3.225	4.748	1.55345e+06	1.38342e+06	939635	231749	291378	24.26	54.87	55.88	9.7	29.95	1.55345e+06	1.38833e+06	2.17293e+06	767652	2.4229e+06	1.38342e+06	1.87607e+06	641925	939635
n/a	High	Master Protein	Q9NZT1	Calmodulin-like protein 5 [OS=Homo sapiens]		0.003	32	4	20	4	146	15.9	4.44	5.07	regulation of biological process;response to stimulus;transport	extracellular	metal ion binding;protein binding	Pf00036, Pf12763, Pf13202, Pf13405, Pf13499, Pf13833	51806	ENSG00000178372.7	CALML5	10	Alzheimers Disease	Vascular smooth muscle contraction; Pertussis; Glioma; cAMP signaling pathway; Oxytocin signaling pathway; Inflammatory mediator regulation of TRP channels; Amphetamine addiction; Alzheimer's disease; Dopaminergic synapse; Tuberculosis; Circadian entrainment; Ras signaling pathway; Neurotrophin signaling pathway; Gastric acid secretion; Phosphatidylinositol signaling system; Estrogen signaling pa…	Neutrophil degranulation	36	0.537	9.362	0.01	7.693	1.30402e+06	1.07154e+06		74746.4	139293				32.54	76.06		1.30402e+06			1.07154e+06
n/a	High	Master Protein	Q08554-1	Desmocollin-1 [OS=Homo sapiens]		0	9	8	55	8	894	99.9	5.43	35.92	cell death;transport	cytoskeleton;membrane	metal ion binding	Pf00028, Pf01049, Pf08758	1823	ENSG00000134765.9	DSC1	18			Formation of the cornified envelope; Neutrophil degranulation	6	0.907	100	100	42.404	3.63095e+07	1.13663e+07	3.47649e+07	243016	268047	18.12	34.19	32.15	18.47	27.44	3.07624e+07	4.41348e+07	3.63095e+07	6.78969e+06	1.40482e+07	1.13663e+07	1.88287e+07	3.61092e+07	3.47649e+07
n/a	High	Master Protein	Q9P258	Protein RCC2 [OS=Homo sapiens]		0	18	8	58	8	522	56	8.78	38.82	cell division;cell organization and biogenesis;regulation of biological process;response to stimulus	chromosome;cytoplasm;cytoskeleton;cytosol;membrane;nucleus	protein binding;RNA binding	Pf00415, Pf13540	55920	ENSG00000281540.2; ENSG00000179051.13	RCC2	1; CHR_HG2095_PATCH			Amplification of signal from unattached kinetochores via a MAD2 inhibitory signal; Separation of Sister Chromatids; Resolution of Sister Chromatid Cohesion; RHO GTPases Activate Formins	16	0.402	100	100	100	7.97623e+07	3.36015e+07	5.72673e+07	65944	164100	19.39	31.77	23.99	44.9	109.97	5.59494e+07	8.05205e+07	7.97623e+07	2.38875e+07	4.56992e+07	3.36015e+07	3.65251e+07	5.72673e+07	5.77473e+07
n/a	High	Master Protein	P84243	histone H3.3 [OS=Homo sapiens]		0	32	8	145	8	136	15.3	11.27	20.72	cell differentiation;cell organization and biogenesis;cell proliferation;coagulation;metabolic process;regulation of biological process;response to stimulus	chromosome;extracellular;nucleus	DNA binding;protein binding	Pf00125, Pf15630	3020; 440926; 3021	ENSG00000132475.10; ENSG00000163041.9	H3F3A; H3F3AP4; H3F3B	1; 2; 17	Gastric Cancer Network 1; Histone Modifications	Systemic lupus erythematosus; Transcriptional misregulation in cancer; Alcoholism	SIRT1 negatively regulates rRNA expression; Activation of anterior HOX genes in hindbrain development during early embryogenesis; NoRC negatively regulates rRNA expression; Factors involved in megakaryocyte development and platelet production; Transcriptional regulation by small RNAs; Meiotic recombination; PRC2 methylates histones and DNA; Formation of the beta-catenin:TCF transactivating comple…	54	15.518	100	100	100	1.24861e+09	4.80395e+08	9.4917e+08	1.35428e+07	872722	21.06	25.38	23.05	25.2	107.95	9.08555e+08	1.39444e+09	1.24861e+09	4.02613e+08	6.56846e+08	4.80395e+08	6.4565e+08	1.02681e+09	9.4917e+08
n/a	High	Master Protein	P33991	DNA replication licensing factor MCM4 [OS=Homo sapiens]		0	9	8	56	8	863	96.5	6.74	49.74	metabolic process	membrane;nucleus	catalytic activity;DNA binding;nucleotide binding;protein binding	Pf00493, Pf07728, Pf14551	4173	ENSG00000104738.16	MCM4	8	Cell Cycle; Gastric Cancer Network 1; Retinoblastoma (RB) in Cancer; G1 to S cell cycle control; DNA Replication	DNA replication; Cell cycle	M/G1 Transition; Assembly of the pre-replicative complex; Unwinding of DNA; Regulation of DNA replication; Activation of ATR in response to replication stress; Activation of the pre-replicative complex; Orc1 removal from chromatin; Removal of licensing factors from origins	27	22.413	100	100	100	6.37418e+07	2.83087e+07	8.74871e+07	1.48998e+06	66477.8	12.94	17.21	25.37	14.42	86	6.37418e+07	5.6908e+07	7.35769e+07	2.46785e+07	3.46095e+07	2.83087e+07	5.45189e+07	8.74871e+07	8.9206e+07
n/a	High	Master Protein	O60245-2	Isoform B of Protocadherin-7 [OS=Homo sapiens]		0	9	8	36	8	1072	116.4	5.2	34.41	transport	membrane	metal ion binding	Pf00028, Pf08266, Pf08374	5099	ENSG00000169851.15	PCDH7	4				0	1.29	100	84.801	8.714	1.53388e+07	1.04227e+06	1.01424e+07	154287	119602	14.61	97.03	33.62	16.77	30.38	1.23745e+07	1.53388e+07	1.65701e+07		449735	2.41547e+06	6.44495e+06	1.01424e+07	1.30806e+07
n/a	High	Master Protein	Q15393-1	Splicing factor 3B subunit 3 [OS=Homo sapiens]		0	13	15	110	15	1217	135.5	5.26	54.04	cell organization and biogenesis;metabolic process;regulation of biological process	nucleus;spliceosomal complex	protein binding;RNA binding	Pf03178, Pf10433	23450	ENSG00000189091.12	SF3B3	16	mRNA Processing	Spliceosome	mRNA Splicing - Major Pathway; mRNA Splicing - Minor Pathway	7	17.697	100	100	100	8.09148e+07	3.26171e+07	6.45615e+07	129957	7343.55	13.48	27.21	23.27	29.23	94.9	6.97861e+07	9.15601e+07	8.09148e+07	3.26171e+07	5.01931e+07	3.17901e+07	4.65889e+07	6.45615e+07	7.5175e+07
n/a	High	Master Protein	P22748	Carbonic anhydrase 4 [OS=Homo sapiens]		0	21	6	45	6	312	35	7.83	30.64	metabolic process;transport	cell surface;endoplasmic reticulum;Golgi;membrane	catalytic activity;metal ion binding;protein binding	Pf00194	762	ENSG00000167434.9	CA4	17		Proximal tubule bicarbonate reclamation; Nitrogen metabolism	Reversible hydration of carbon dioxide; Erythrocytes take up carbon dioxide and release oxygen; Erythrocytes take up oxygen and release carbon dioxide	8	0.435	31.183	31.986	4.729	1.92836e+08	2.92415e+07	1.97803e+08	2.68885e+06	6.18401e+06	30.76	28.7	27.55	8.78	14.59	1.15255e+08	1.92836e+08	2.19322e+08	2.19013e+07	3.91062e+07	2.92415e+07	1.16568e+08	1.98498e+08	1.97803e+08
n/a	High	Master Protein	Q16629	serine/arginine-rich splicing factor 7 [OS=Homo sapiens]		0	34	8	57	8	238	27.4	11.82	29.28	metabolic process;regulation of biological process;transport	cytoplasm;nucleus	metal ion binding;protein binding;RNA binding	Pf00076, Pf13893, Pf14259	6432	ENSG00000115875.18	SRSF7	2	mRNA Processing	Spliceosome; Herpes simplex infection	Cleavage of Growing Transcript in the Termination Region ; Transport of Mature mRNA derived from an Intron-Containing Transcript; mRNA 3'-end processing; mRNA Splicing - Major Pathway; mRNA Splicing - Minor Pathway	15	2.648	100	100	100	5.61337e+07	3.21952e+07	6.78346e+07	55588.8	20991.7	13.27	23.58	24.52	70.32	13.39	4.87724e+07	5.61337e+07	6.3691e+07	2.39321e+07	3.8828e+07	3.21952e+07	4.44155e+07	7.26839e+07	6.78346e+07
n/a	High	Master Protein	Q9HDC9	Adipocyte plasma membrane-associated protein [OS=Homo sapiens]		0	25	11	53	11	416	46.5	6.16	24.97	metabolic process	cell surface;endoplasmic reticulum;membrane	catalytic activity	Pf03088, Pf08450	57136	ENSG00000101474.11	APMAP	20				0	32.339	100	100	100	4.0585e+07	1.76624e+07	3.43502e+07	3.10454e+06	95999.2	22.47	37.15	31.59	26.08	99.05	2.82443e+07	4.45084e+07	4.0585e+07	1.47215e+07	2.91386e+07	1.76624e+07	1.91251e+07	3.43502e+07	3.65143e+07
n/a	High	Master Protein	P17844	probable ATP-dependent RNA helicase DDX5 [OS=Homo sapiens]		0	21	11	74	8	614	69.1	8.92	73.79	cell differentiation;cell growth;cell organization and biogenesis;metabolic process;regulation of biological process;response to stimulus	cytoplasm;membrane;nucleus;spliceosomal complex	catalytic activity;nucleotide binding;protein binding;RNA binding	Pf00270, Pf00271, Pf08061	1655	ENSG00000108654.13	DDX5	17		Transcriptional misregulation in cancer; Spliceosome; Proteoglycans in cancer	mRNA Splicing - Major Pathway	7	0.042	64.009	74.022	17.711	5.57047e+07	1.54129e+07	6.4419e+07	36378.7	870267	16.95	14.08	22.75		75.71	5.05105e+07	5.57047e+07	6.97306e+07	1.31251e+07	1.74375e+07	1.54129e+07	4.27271e+07	6.65051e+07	6.4419e+07
n/a	High	Master Protein	P42766	60S ribosomal protein L35 [OS=Homo sapiens]		0	33	8	99	8	123	14.5	11.05	42.8	cell organization and biogenesis;metabolic process;transport	cytosol;membrane;ribosome	RNA binding;structural molecule activity	Pf00831	11224	ENSG00000136942.14	RPL35	9	Cytoplasmic Ribosomal Proteins	Ribosome	Peptide chain elongation; Eukaryotic Translation Termination; Viral mRNA Translation; L13a-mediated translational silencing of Ceruloplasmin expression; Nonsense Mediated Decay (NMD) independent of the Exon Junction Complex (EJC); Selenocysteine synthesis; Nonsense Mediated Decay (NMD) enhanced by the Exon Junction Complex (EJC); GTP hydrolysis and joining of the 60S ribosomal subunit; Major path…	34	2.142	100	100	100	1.92173e+08	7.25719e+07	2.19374e+08	341510	159472	8.25	29.06	13.27	12.29	130.05	1.83448e+08	2.14922e+08	1.92173e+08	6.26176e+07	1.07363e+08	7.25719e+07	1.84133e+08	2.40537e+08	2.19374e+08
n/a	High	Master Protein	Q15722	Leukotriene B4 receptor 1 [OS=Homo sapiens]		0	18	5	26	5	352	37.5	11.11	28.56	cellular component movement;defense response;regulation of biological process;response to stimulus	membrane	nucleotide binding;receptor activity;signal transducer activity	Pf00001	1241	ENSG00000213903.8	LTB4R	14	Spinal Cord Injury; GPCRs, Class A Rhodopsin-like; Nucleotide GPCRs	Neuroactive ligand-receptor interaction	Leukotriene receptors; Gastrin-CREB signalling pathway via PKC and MAPK	13	100	100	88.832	0.01	3.58086e+06		303514	352416	3416.71	28.73		42.61	28.91	10.67	2.10938e+06	3.58086e+06	3.75728e+06				222406	414201
n/a	High	Master Protein	Q9UM07	Protein-arginine deiminase type-4 [OS=Homo sapiens]		0.001	13	10	33	10	663	74	6.58	15.08	cell organization and biogenesis;defense response;metabolic process;regulation of biological process;response to stimulus	cytoplasm;cytosol;nucleus	catalytic activity;metal ion binding;protein binding	Pf03068, Pf08526, Pf08527	23569	ENSG00000280908.2; ENSG00000159339.13	PADI4	1; CHR_HG2095_PATCH			Chromatin modifying enzymes	2	100	100	100	100	5.50086e+06	1.98856e+07	5.57758e+06	450307	2075.2	4.63	27.48	2.51	14.03		5.77444e+06	5.26411e+06	5.50086e+06	1.58227e+07	2.71935e+07	1.98856e+07	5.36874e+06	5.57758e+06	5.63089e+06
n/a	High	Master Protein	P23526-1	Adenosylhomocysteinase [OS=Homo sapiens]		0	25	11	101	11	432	47.7	6.34	66.75	defense response;metabolic process;response to stimulus;transport	cytoplasm;cytosol;nucleus	catalytic activity;nucleotide binding;protein binding	Pf00670, Pf02254, Pf02826, Pf05221	191	ENSG00000101444.12	AHCY	20	Folate Metabolism; Trans-sulfuration pathway; One Carbon Metabolism; Trans-sulfuration and one carbon metabolism	Metabolic pathways; Cysteine and methionine metabolism	Metabolism of ingested SeMet, Sec, MeSec into H2Se; Defective AHCY causes Hypermethioninemia with S-adenosylhomocysteine hydrolase deficiency (HMAHCHD); Sulfur amino acid metabolism; Methylation	18	52.363	100	100	100	1.20849e+08	1.95715e+07	8.58012e+07	2.10914e+06	40278.8	21.74	20.38	32.47	80.29	94.08	8.20701e+07	1.20849e+08	1.25332e+08	1.95715e+07	2.63306e+07	1.81937e+07	4.57808e+07	8.58012e+07	8.79975e+07
n/a	High	Master Protein	Q13263	Transcription intermediary factor 1-beta [OS=Homo sapiens]		0	8	7	51	7	835	88.5	5.77	32	cell organization and biogenesis;defense response;metabolic process;regulation of biological process;response to stimulus	chromosome;nucleus	catalytic activity;DNA binding;metal ion binding;protein binding;RNA binding	Pf00628, Pf00643	10155	ENSG00000130726.11	TRIM28	19	Corticotropin-releasing hormone signaling pathway; Mesodermal Commitment Pathway; ATM Signaling Network in Development and Disease		Generic Transcription Pathway	6	1.878	100	100	100	5.87675e+07	4.75771e+07	5.10488e+07	88080.7	46896.1	52.88	35.1	9.29	78.46	61.9	5.87675e+07	1.76075e+07	5.92527e+07	4.75771e+07	2.42291e+07	5.00968e+07	5.08126e+07	5.95874e+07	5.10488e+07
n/a	High	Master Protein	Q01629	Interferon-induced transmembrane protein 2 [OS=Homo sapiens]		0	12	1	17	1	132	14.6	7.42	25.49	defense response;regulation of biological process;response to stimulus	membrane		Pf04505	10581	ENSG00000185201.16	IFITM2	11			Interferon alpha/beta signaling	4	11.488	93.698	24.089	100	1.77913e+06	2.21036e+06	457395	218130	18987.9	41.6	6.71		16.72	123.39	1.0978e+06	2.61948e+06	1.77913e+06	2.16153e+06	2.44658e+06	2.21036e+06	457395
n/a	High	Master Protein	O14974-5	Isoform 5 of Protein phosphatase 1 regulatory subunit 12A [OS=Homo sapiens]		0	16	15	68	15	943	105.6	5.38	43.68	cell organization and biogenesis;metabolic process;regulation of biological process;response to stimulus	chromosome;cytoskeleton;cytosol	enzyme regulator activity;protein binding;signal transducer activity	Pf00023, Pf03961, Pf12796, Pf13606, Pf13637, Pf13857	4659	ENSG00000058272.16	PPP1R12A	12	Focal Adhesion; Regulation of Actin Cytoskeleton			2	2.117	100	100	100	1.24497e+08	2.96053e+07	7.70642e+07	170951	80749.3	17.94	27.18	25.23	66.07	38.65	9.17207e+07	1.24497e+08	1.30036e+08	2.32001e+07	3.9838e+07	2.96053e+07	4.91306e+07	7.70642e+07	8.11792e+07
n/a	High	Master Protein	P37837	Transaldolase [OS=Homo sapiens]		0	31	11	51	11	337	37.5	6.81	36.75	metabolic process;regulation of biological process;response to stimulus	cytoplasm;cytosol;nucleus	catalytic activity;protein binding	Pf00923	6888	ENSG00000177156.10	TALDO1	11	Pentose Phosphate Pathway; Cori Cycle	Biosynthesis of amino acids; Pentose phosphate pathway; Metabolic pathways; Carbon metabolism	Gene and protein expression by JAK-STAT signaling after Interleukin-12 stimulation; Insulin effects increased synthesis of Xylulose-5-Phosphate; TALDO1 deficiency: failed conversion of Fru(6)P, E4P to SH7P, GA3P; Interleukin-12 family signaling; TALDO1 deficiency: failed conversion of SH7P, GA3P to Fru(6)P, E4P; Pentose phosphate pathway (hexose monophosphate shunt)	22	34.783	100	100	100	3.13064e+07	1.28077e+07	1.54384e+07	1.76609e+06	50774.5	43.29	45.28	29.31	25.25	95.37	1.36462e+07	3.55464e+07	3.13064e+07	9.15351e+06	2.20406e+07	1.28077e+07	9.1121e+06	1.65626e+07	1.54384e+07
n/a	High	Master Protein	P31939	bifunctional purine biosynthesis protein purH [OS=Homo sapiens]		0	14	6	29	6	592	64.6	6.71	36.59	metabolic process;response to stimulus	cytosol;membrane;mitochondrion	catalytic activity;protein binding	Pf01808, Pf02142	471	ENSG00000138363.14	ATIC	2	One Carbon Metabolism	One carbon pool by folate; Purine metabolism; Metabolic pathways; Antifolate resistance	Purine ribonucleoside monophosphate biosynthesis	9	0.564	48.002	25.223	9.129	1.35183e+07	2.57088e+06	7.10332e+06	158822	281622	22.85	13.87	28.16	99.95	37.02	1.03466e+07	1.64946e+07	1.35183e+07	2.57088e+06	2.47148e+06	3.17369e+06	5.67179e+06	7.10332e+06	9.8507e+06
n/a	High	Master Protein	P31153	S-adenosylmethionine synthase isoform type-2 [OS=Homo sapiens]		0	20	7	50	7	395	43.6	6.48	25.35	cell organization and biogenesis;metabolic process	cytosol	catalytic activity;metal ion binding;nucleotide binding;protein binding	Pf00438, Pf02772, Pf02773	4144	ENSG00000168906.12	MAT2A	2	Trans-sulfuration and one carbon metabolism; One carbon metabolism and related pathways; Methylation Pathways	Biosynthesis of amino acids; Metabolic pathways; Cysteine and methionine metabolism	Methylation	10	5.917	100	100	100	4.62422e+07	9.06411e+06	3.04796e+07	27861.8	4709.02	38.4	20.63	28.28	34.89	62.69	3.2548e+07	4.62422e+07	7.02289e+07	8.30859e+06	1.21401e+07	9.06411e+06	1.77241e+07	3.07442e+07	3.04796e+07
n/a	High	Master Protein	Q00341-1	Vigilin [OS=Homo sapiens]		0	9	10	56	10	1268	141.4	6.87	46.8	metabolic process;transport	cytoplasm;cytosol;membrane;nucleus	protein binding;RNA binding	Pf00013, Pf13014, Pf14611	3069		HDLBP	2			HDL clearance	4	5.737	100	100	100	8.08771e+07	2.81952e+07	7.922e+07	93515	16299.3	19.37	27.64	18.15	37.79	125.98	5.70174e+07	8.23614e+07	8.08771e+07	2.26968e+07	3.89715e+07	2.81952e+07	5.76667e+07	7.922e+07	8.17126e+07
n/a	High	Master Protein	P62899	60S ribosomal protein L31 [OS=Homo sapiens]		0	48	8	76	8	125	14.5	10.54	40.49	cell organization and biogenesis;metabolic process;transport	cytosol;membrane;ribosome	protein binding;RNA binding;structural molecule activity	Pf01198	6160	ENSG00000071082.10	RPL31	2	Cytoplasmic Ribosomal Proteins	Ribosome	Peptide chain elongation; Eukaryotic Translation Termination; Viral mRNA Translation; L13a-mediated translational silencing of Ceruloplasmin expression; Nonsense Mediated Decay (NMD) independent of the Exon Junction Complex (EJC); Selenocysteine synthesis; Nonsense Mediated Decay (NMD) enhanced by the Exon Junction Complex (EJC); GTP hydrolysis and joining of the 60S ribosomal subunit; Major path…	34	6.506	100	100	100	2.07951e+08	4.66882e+07	2.21213e+08	89659.6	13781.5	20.1	23.79	28.44	90.78	101.77	1.46437e+08	2.16586e+08	2.07951e+08	5.50356e+07	4.66882e+07	3.37232e+07	1.3627e+08	2.21213e+08	2.4486e+08
n/a	High	Master Protein	P62277	40S ribosomal protein S13 [OS=Homo sapiens]		0	42	7	103	7	151	17.2	10.54	30.63	cell organization and biogenesis;metabolic process;regulation of biological process;transport	cytosol;membrane;nucleus;ribosome	protein binding;RNA binding;structural molecule activity	Pf00312, Pf08069	6207	ENSG00000110700.6	RPS13	11	Cytoplasmic Ribosomal Proteins	Ribosome	Peptide chain elongation; Eukaryotic Translation Termination; Viral mRNA Translation; Formation of the ternary complex, and subsequently, the 43S complex; L13a-mediated translational silencing of Ceruloplasmin expression; Selenocysteine synthesis; Nonsense Mediated Decay (NMD) independent of the Exon Junction Complex (EJC); Nonsense Mediated Decay (NMD) enhanced by the Exon Junction Complex (EJC)…	38	1.469	100	100	100	1.27042e+08	9.25797e+07	1.06821e+08	204994	139508	21.92	32.62	28.5	58.19	112.47	8.62791e+07	1.32525e+08	1.27042e+08	5.60419e+07	1.11778e+08	9.25797e+07	6.28664e+07	1.11015e+08	1.06821e+08
n/a	High	Master Protein	P17213	Bactericidal permeability-increasing protein [OS=Homo sapiens]		0	16	6	37	6	487	53.9	9.38	27.26	defense response;regulation of biological process;response to stimulus;transport	cytoplasm;extracellular;membrane;organelle lumen		Pf01273, Pf02886	671	ENSG00000101425.12	BPI	20			Antimicrobial peptides; Neutrophil degranulation; Toll Like Receptor 4 (TLR4) Cascade	6	25.949	100	100	100	5.78621e+06	2.50832e+07	3.02161e+06	454032	17496.9	42.99	29.26	82.78	28.34	72.83	5.78621e+06	7.30294e+06	2.82084e+06	1.96234e+07	3.49503e+07	2.50832e+07	665514	5.9994e+06	3.02161e+06
n/a	High	Master Protein	Q02413	Desmoglein-1 [OS=Homo sapiens]		0	7	7	47	7	1049	113.7	5.03	40.7	cell death;cell organization and biogenesis;regulation of biological process;response to stimulus;transport	cytoskeleton;cytosol;membrane	metal ion binding;protein binding	Pf00028, Pf01049	1828	ENSG00000134760.5	DSG1	18		Staphylococcus aureus infection	Apoptotic cleavage of cell adhesion proteins; Formation of the cornified envelope; Neutrophil degranulation	12	0.364	6.555	5.765	6.587	4.05643e+06	4.0762e+06	3.56755e+06	225441	618841	14.1	54.35	10.67	13.2	32.72	3.59301e+06	4.75135e+06	4.05643e+06	2.92244e+06	8.14503e+06	4.0762e+06	3.15838e+06	3.56755e+06	3.9147e+06
n/a	High	Master Protein	Q9NR30-1	Nucleolar RNA helicase 2 [OS=Homo sapiens]		0	13	9	58	9	783	87.3	9.28	41.61	cell differentiation;metabolic process;regulation of biological process;response to stimulus	cytoplasm;membrane;nucleus	catalytic activity;nucleotide binding;protein binding;RNA binding	Pf00270, Pf00271, Pf08152, Pf14617	9188	ENSG00000165732.12	DDX21	10			Major pathway of rRNA processing in the nucleolus and cytosol; B-WICH complex positively regulates rRNA expression	8	0.228	100	100	44.988	1.2516e+08	3.56107e+07	1.11374e+08	180784	791559	16.79	27.65	24.96	15.88	21.14	9.51448e+07	1.32349e+08	1.2516e+08	2.8376e+07	4.88849e+07	3.56107e+07	7.08371e+07	1.11374e+08	1.15861e+08
n/a	High	Master Protein	P22314	Ubiquitin-like modifier-activating enzyme 1 [OS=Homo sapiens]		0	9	7	49	7	1058	117.8	5.76	44.12	metabolic process;response to stimulus	cytoplasm;cytosol;membrane;mitochondrion;nucleus	catalytic activity;nucleotide binding;protein binding;RNA binding	Pf00899, Pf02134, Pf09358, Pf10585	7317	ENSG00000130985.16	UBA1	X	Proteasome Degradation; Parkin-Ubiquitin Proteasomal System pathway; Parkinsons Disease Pathway	Parkinson's disease; Ubiquitin mediated proteolysis	Synthesis of active ubiquitin: roles of E1 and E2 enzymes; Antigen processing: Ubiquitination & Proteasome degradation	13	9.074	100	100	100	1.15398e+07	1.77331e+06	7.95642e+06	96426.4	10626.4	31.27	34.2	47.57	7	92.11	8.96205e+06	1.15398e+07	1.6559e+07	1.35029e+06	2.63899e+06	1.77331e+06	3.25744e+06	9.63476e+06	7.95642e+06
n/a	High	Master Protein	P40925	Malate dehydrogenase, cytoplasmic [OS=Homo sapiens]		0	28	8	35	8	334	36.4	7.36	34.31	metabolic process	cytoplasm;cytosol;mitochondrion	catalytic activity;nucleotide binding;protein binding	Pf00056, Pf02866	4190	ENSG00000014641.17	MDH1	2	Sterol Regulatory Element-Binding Proteins (SREBP) signalling; TCA Cycle and Deficiency of Pyruvate Dehydrogenase complex (PDHc); Amino Acid metabolism; Glycolysis and Gluconeogenesis	Metabolic pathways; Carbon metabolism; Glyoxylate and dicarboxylate metabolism; Proximal tubule bicarbonate reclamation; Citrate cycle (TCA cycle); Cysteine and methionine metabolism; Pyruvate metabolism	Gluconeogenesis	15	6.478	100	100	100	2.05228e+07	7.75322e+06	1.75646e+07	105090	16221.7	24.03	22.89	23.25	29.3	108.5	1.33486e+07	2.05228e+07	2.14373e+07	6.1063e+06	9.69702e+06	7.75322e+06	1.19676e+07	1.915e+07	1.75646e+07
n/a	High	Master Protein	P62888	60S ribosomal protein L30 [OS=Homo sapiens]		0	63	6	79	6	115	12.8	9.63	89.84	cell organization and biogenesis;defense response;metabolic process;response to stimulus;transport	cytosol;membrane;nucleus;ribosome	protein binding;RNA binding;structural molecule activity	Pf01248	6156	ENSG00000156482.10	RPL30	8	Selenium Metabolism and Selenoproteins; Cytoplasmic Ribosomal Proteins	Ribosome	Peptide chain elongation; Eukaryotic Translation Termination; Viral mRNA Translation; L13a-mediated translational silencing of Ceruloplasmin expression; Nonsense Mediated Decay (NMD) independent of the Exon Junction Complex (EJC); Selenocysteine synthesis; Nonsense Mediated Decay (NMD) enhanced by the Exon Junction Complex (EJC); GTP hydrolysis and joining of the 60S ribosomal subunit; Major path…	35	0.125	100	100	100	1.32568e+08	7.21316e+07	1.21798e+08	30985.4	247045	17.23	26.29	23.74	46.07	14	1.05838e+08	1.50172e+08	1.32568e+08	4.98184e+07	8.59188e+07	7.21316e+07	7.93491e+07	1.21798e+08	1.26313e+08
n/a	High	Master Protein	Q15366-1	Poly(rC)-binding protein 2 [OS=Homo sapiens]		0	20	6	41	4	365	38.6	6.79	35.24	defense response;metabolic process;regulation of biological process;response to stimulus	cytoplasm;cytosol;membrane;nucleus	DNA binding;protein binding;RNA binding	Pf00013, Pf13014	5094	ENSG00000197111.15	PCBP2	12	mRNA Processing		Negative regulators of DDX58/IFIH1 signaling; mRNA Splicing - Major Pathway	9	11.149	100	100	100	4.32044e+07	9.29459e+06	4.83952e+07	62618.6	5616.3	18.21	15.95	27.24			3.42337e+07	4.95853e+07	4.32044e+07	7.00861e+06	9.29459e+06	9.45953e+06	3.07118e+07	5.37663e+07	4.83952e+07
n/a	High	Master Protein	Q01130	serine/arginine-rich splicing factor 2 [OS=Homo sapiens]		0.001	19	5	19	5	221	25.5	11.85	12.42	metabolic process;regulation of biological process;response to stimulus;transport	cytosol;nucleus;spliceosomal complex	protein binding;RNA binding	Pf00076, Pf13893, Pf14259	6427	ENSG00000161547.16	SRSF2	17	mRNA Processing	Herpes simplex infection; Spliceosome	Cleavage of Growing Transcript in the Termination Region ; Transport of Mature mRNA derived from an Intron-Containing Transcript; mRNA 3'-end processing; mRNA Splicing - Major Pathway; mRNA Splicing - Minor Pathway	15	25.758	100	100	100	5.35137e+07	2.87307e+07	7.26124e+07	98317.8	3816.99	14.79	25.51	26.97			4.5165e+07	6.08928e+07	5.35137e+07	2.87307e+07	4.23442e+07	2.71529e+07	4.42068e+07	7.26124e+07	7.54851e+07
n/a	High	Master Protein	P08246	Neutrophil elastase [OS=Homo sapiens]		0	16	5	51	5	267	28.5	9.35	25.74	cell organization and biogenesis;cellular component movement;cellular homeostasis;defense response;metabolic process;regulation of biological process;response to stimulus;transport	cell surface;cytoplasm;extracellular;organelle lumen	catalytic activity;protein binding	Pf00089, Pf09342	1991	ENSG00000277571.2; ENSG00000197561.6	ELANE	19; CHR_HSCHR19_5_CTG2		Systemic lupus erythematosus; Transcriptional misregulation in cancer	Collagen degradation; Activation of Matrix Metalloproteinases; Antimicrobial peptides; Regulation of Complement cascade; Neutrophil degranulation	12	100	100	100	100	3.76861e+06	4.43442e+08	2.17095e+06	1.02872e+07	11891.8	40.88	29.96	26.89	3.1	96.46	3.76861e+06	3.52185e+06	7.01462e+06	3.84356e+08	6.67412e+08	4.43442e+08	2.59259e+06	1.48322e+06	2.17095e+06
n/a	High	Master Protein	P50995	annexin A11 [OS=Homo sapiens]		0.001	18	11	47	10	505	54.4	7.65	12.6	cell division;response to stimulus;transport	cytoplasm;cytoskeleton;cytosol;membrane;nucleus;vacuole	metal ion binding;protein binding;RNA binding	Pf00191	311	ENSG00000122359.17	ANXA11	10				0	10.329	75.112	74.288	48.342	8.53609e+06	5.49374e+06	8.44244e+06	1.17381e+06	113644	87.9	40.89	32.93	24.27	52.25	5.0499e+06	2.73453e+07	8.53609e+06	5.49374e+06	1.05511e+07	5.45642e+06	7.53241e+06	1.3545e+07	8.44244e+06
n/a	High	Master Protein	Q9NVA2-2	Isoform 2 of Septin-11 [OS=Homo sapiens]		0	18	7	47	7	439	50.8	7.01	18.34	cell division;cell organization and biogenesis	cytoplasm	nucleotide binding;protein binding	Pf00735	55752	ENSG00000138758.11	SEPT11	4				0	3.132	100	100	100	7.31143e+07	1.35575e+07	3.961e+07	56430.5	18016.8	22.57	25.62	32.62	23.2	126.27	5.55464e+07	8.81412e+07	7.31143e+07	9.65827e+06	1.63969e+07	1.35575e+07	2.32699e+07	3.961e+07	4.63794e+07
n/a	High	Master Protein	P41218	Myeloid cell nuclear differentiation antigen [OS=Homo sapiens]		0	26	11	35	11	407	45.8	9.76	26.99	cellular component movement;defense response;metabolic process;regulation of biological process;response to stimulus;transport	cytoplasm;extracellular;nucleus;organelle lumen	DNA binding;protein binding;transporter activity	Pf02758, Pf02760	4332	ENSG00000163563.7	MNDA	1			Neutrophil degranulation	3	7.117	100	59.475	100	8.4043e+06	2.68147e+07	4.28794e+06	513136	72096.7	6.47	22.37	15.05	37.96	64.45	8.4043e+06	7.51529e+06	8.44472e+06	2.27684e+07	3.51591e+07	2.68147e+07	4.96441e+06	3.66848e+06	4.28794e+06
n/a	High	Master Protein	P31948	stress-induced-phosphoprotein 1 [OS=Homo sapiens]		0	28	18	82	18	543	62.6	6.8	33.83	response to stimulus	cytoplasm;cytosol;Golgi;nucleus	protein binding;RNA binding	Pf00515, Pf12895, Pf13414, Pf13424, Pf13432	10963	ENSG00000168439.16	STIP1	11		Prion diseases	HSP90 chaperone cycle for steroid hormone receptors (SHR)	4	5.287	100	100	100	1.20677e+08	3.8166e+07	1.17708e+08	987734	186837	11.49	18.06	24.53	13.5	44.28	1.0704e+08	1.20677e+08	1.3481e+08	3.25335e+07	4.65615e+07	3.8166e+07	7.66796e+07	1.17708e+08	1.25237e+08
n/a	High	Master Protein	P46783	40S ribosomal protein S10 [OS=Homo sapiens]		0	26	5	50	5	165	18.9	10.15	40.1	cell organization and biogenesis;metabolic process;transport	cytoplasm;cytosol;membrane;nucleus;ribosome	protein binding;RNA binding;structural molecule activity	Pf03501	6204	ENSG00000124614.13	RPS10	6	Cytoplasmic Ribosomal Proteins	Ribosome	Peptide chain elongation; Eukaryotic Translation Termination; Viral mRNA Translation; Formation of the ternary complex, and subsequently, the 43S complex; L13a-mediated translational silencing of Ceruloplasmin expression; Selenocysteine synthesis; Nonsense Mediated Decay (NMD) independent of the Exon Junction Complex (EJC); Nonsense Mediated Decay (NMD) enhanced by the Exon Junction Complex (EJC)…	38	3.436	100	100	100	5.24722e+07	9.8298e+06	5.58239e+07	78647.5	22888.4	21.81	9.2	23.03	53.96	101.43	3.87671e+07	6.0607e+07	5.24722e+07	9.8298e+06	1.06026e+07	8.81386e+06	3.67136e+07	5.73718e+07	5.58239e+07
n/a	High	Master Protein	P0DOX7	immunoglobulin kappa light chain [OS=Homo sapiens]		0	24	3	43	3	214	23.4	7.17	55.13	response to stimulus	extracellular;membrane		Pf00047, Pf07654, Pf07679, Pf07686, Pf13927								0	0.613	7.239	15.256	8.654	1.25053e+06	1.49507e+06	2.63557e+06	105979	172753	72.28	27.63	12.65	28.05	32.12	1.25053e+06	177526	1.52101e+06		1.82222e+06	1.22665e+06	2.38647e+06	3.0605e+06	2.63557e+06
n/a	High	Master Protein	Q15459	splicing factor 3A subunit 1 [OS=Homo sapiens]		0	10	8	67	8	793	88.8	5.22	45.59	cell organization and biogenesis;metabolic process;regulation of biological process	nucleus;spliceosomal complex	protein binding;RNA binding	Pf00240, Pf01805, Pf12230, Pf14560	10291	ENSG00000099995.18	SF3A1	22	mRNA Processing	Spliceosome	mRNA Splicing - Major Pathway	6	5.296	100	100	100	7.22529e+07	1.98964e+07	8.46818e+07	582801	110037	15.82	36.13	22.24	18.82	53.61	5.69089e+07	7.80491e+07	7.22529e+07	1.96586e+07	3.54127e+07	1.98964e+07	5.65705e+07	8.46818e+07	8.69409e+07
n/a	High	Master Protein	P08195-2	Isoform 2 of 4F2 cell-surface antigen heavy chain [OS=Homo sapiens]		0	15	9	36	9	529	57.9	5.35	20.45	cell growth;cellular component movement;metabolic process;response to stimulus;transport	cell surface;cytosol;membrane;nucleus	catalytic activity;protein binding;RNA binding;transporter activity	Pf00128	6520	ENSG00000168003.16	SLC3A2	11				0	9.486	100	100	100	1.53513e+08	4.69239e+07	1.43142e+08	328622	34643.1	21.97	32.37	29.44	11.64		1.09724e+08	1.71692e+08	1.53513e+08	3.32609e+07	6.43843e+07	4.69239e+07	8.33567e+07	1.43142e+08	1.51222e+08
n/a	High	Master Protein	P46778	60S ribosomal protein L21 [OS=Homo sapiens]		0	34	6	60	6	160	18.6	10.49	21.5	cell organization and biogenesis;metabolic process;transport	cytosol;membrane;ribosome	protein binding;RNA binding;structural molecule activity	Pf01157	6144	ENSG00000122026.10	RPL21	13	Cytoplasmic Ribosomal Proteins	Ribosome	Peptide chain elongation; Eukaryotic Translation Termination; Viral mRNA Translation; L13a-mediated translational silencing of Ceruloplasmin expression; Nonsense Mediated Decay (NMD) independent of the Exon Junction Complex (EJC); Selenocysteine synthesis; Nonsense Mediated Decay (NMD) enhanced by the Exon Junction Complex (EJC); GTP hydrolysis and joining of the 60S ribosomal subunit; Major path…	34	0.346	100	100	100	1.99665e+08	8.24641e+07	2.00135e+08	17725.5	51208.4	11.82	18.41	25.67	39.35	133.22	1.67056e+08	2.10854e+08	1.99665e+08	7.69877e+07	1.07734e+08	8.24641e+07	1.31059e+08	2.00135e+08	2.21588e+08
n/a	High	Master Protein	Q15019-3	Isoform 3 of Septin-2 [OS=Homo sapiens]		0	19	5	23	5	371	42.7	6.86	18.86	cell division;cell organization and biogenesis;regulation of biological process;response to stimulus	cytoplasm;cytoskeleton;cytosol;membrane;nucleus	nucleotide binding;protein binding	Pf00735	4735	ENSG00000168385.17	SEPT2	2				0	1.473	100	100	100	1.26027e+07	739230	2.21302e+06	5270.87	3579.5	15.85	24.91	36.42	20.37		9.6874e+06	1.26027e+07	1.31866e+07	630164	1.01428e+06	739230	1.57404e+06	2.21302e+06	3.27023e+06
n/a	High	Master Protein	P46776	60S ribosomal protein L27a [OS=Homo sapiens]		0	42	8	68	8	148	16.6	11	44.4	cell organization and biogenesis;metabolic process;transport	cytosol;endoplasmic reticulum;membrane;ribosome	protein binding;RNA binding;structural molecule activity	Pf00828	6157	ENSG00000166441.12	RPL27A	11	Cytoplasmic Ribosomal Proteins	Ribosome	Peptide chain elongation; Eukaryotic Translation Termination; Viral mRNA Translation; L13a-mediated translational silencing of Ceruloplasmin expression; Nonsense Mediated Decay (NMD) independent of the Exon Junction Complex (EJC); Selenocysteine synthesis; Nonsense Mediated Decay (NMD) enhanced by the Exon Junction Complex (EJC); GTP hydrolysis and joining of the 60S ribosomal subunit; Major path…	34	7.019	100	100	100	2.23883e+08	4.67862e+07	2.4625e+08	73308.6	10444.4	17.62	25.94	27.99	15.6	138.35	1.70938e+08	2.23883e+08	2.43362e+08	3.75381e+07	6.26694e+07	4.67862e+07	1.44129e+08	2.48415e+08	2.4625e+08
n/a	High	Master Protein	Q8IYB3	Serine/arginine repetitive matrix protein 1 [OS=Homo sapiens]		0.001	6	6	15	2	904	102.3	11.84	12.39	metabolic process;transport	cytosol;nucleus;spliceosomal complex	DNA binding;protein binding;RNA binding	Pf01480	10250	ENSG00000133226.16	SRRM1	1	mRNA Processing	RNA transport; mRNA surveillance pathway	Cleavage of Growing Transcript in the Termination Region ; Transport of Mature mRNA derived from an Intron-Containing Transcript; mRNA 3'-end processing; mRNA Splicing - Major Pathway	14	10.246	100	100	100	2.85899e+07	8.80543e+06	3.028e+07	55568.4	5423.65	22.61	27.54	2.71	6.55	112.91	2.85899e+07	3.42569e+07	2.15575e+07	6.98889e+06	1.20324e+07	8.80543e+06	2.97052e+07	3.133e+07	3.028e+07
n/a	High	Master Protein	Q6IBS0	Twinfilin-2 [OS=Homo sapiens]		0	16	6	28	4	349	39.5	6.84	18.61	cell organization and biogenesis;regulation of biological process;response to stimulus	cytoplasm;cytoskeleton	nucleotide binding;protein binding;RNA binding	Pf00241	11344	ENSG00000247596.8	TWF2	3				0	100	100	100	100	2.40129e+07	1.83305e+07	3.04978e+07	22017.2		25.95	13.16	19.13			2.40129e+07	1.96783e+07	3.26469e+07	1.5557e+07	1.83305e+07	2.0288e+07	2.24163e+07	3.04978e+07	3.28369e+07
n/a	High	Master Protein	Q15942	Zyxin [OS=Homo sapiens]		0	11	5	33	5	572	61.2	6.67	30.85	cell communication;cell organization and biogenesis;regulation of biological process;response to stimulus	cytoplasm;cytoskeleton;cytosol;membrane;nucleus	metal ion binding;protein binding;RNA binding	Pf00412	7791	ENSG00000159840.15	ZYX	7	Integrin-mediated Cell Adhesion; Focal Adhesion	Focal adhesion		3	12.991	100	86.103	100	3.33145e+06	8.40775e+06	1.02528e+06	154686	11907.5	13.19	25.27	9.39	33.88		2.82408e+06	3.68463e+06	3.33145e+06	6.20469e+06	1.04197e+07	8.40775e+06	872554	1.02528e+06	1.03734e+06
n/a	High	Master Protein	Q687X5	Metalloreductase STEAP4 [OS=Homo sapiens]		0.001	12	5	22	5	459	51.9	9.29	15.67	cell differentiation;metabolic process;transport	endosome;Golgi;membrane	catalytic activity;metal ion binding	Pf01794, Pf03807	79689	ENSG00000127954.12	STEAP4	7	Copper homeostasis			1	44.505	100	100	100	5.26601e+06	5.38601e+06	6.7928e+06	222571	5001.03	15.07	35.44	29.72	44.4	110.96	4.10472e+06	5.26601e+06	5.49986e+06	4.12267e+06	8.21092e+06	5.38601e+06	3.84008e+06	6.90209e+06	6.7928e+06
n/a	High	Master Protein	P62879	Guanine nucleotide-binding protein G(I)/G(S)/G(T) subunit beta-2 [OS=Homo sapiens]		0	24	8	77	2	340	37.3	6	77.01	metabolic process;regulation of biological process;response to stimulus	cytoplasm;cytosol;membrane	catalytic activity;protein binding;signal transducer activity	Pf00400	2783	ENSG00000172354.9	GNB2	7	Corticotropin-releasing hormone signaling pathway; Myometrial Relaxation and Contraction Pathways; G Protein Signaling Pathways; Chemokine signaling pathway; Focal Adhesion-PI3K-Akt-mTOR-signaling pathway; Calcium Regulation in the Cardiac Cell	Retrograde endocannabinoid signaling; Circadian entrainment; Dopaminergic synapse; Cholinergic synapse; Alcoholism; Pathways in cancer; Glutamatergic synapse; Chemokine signaling pathway; GABAergic synapse; Morphine addiction; Serotonergic synapse; PI3K-Akt signaling pathway; Ras signaling pathway	G alpha (z) signalling events; Activation of G protein gated Potassium channels; Cooperation of PDCL (PhLP1) and TRiC/CCT in G-protein beta folding; Glucagon-type ligand receptors; Thromboxane signalling through TP receptor; ADP signalling through P2Y purinoceptor 1; G beta:gamma signalling through PI3Kgamma; Vasopressin regulates renal water homeostasis via Aquaporins; G-protein activation; Inhi…	74	5.148	100	100	100	2.14414e+07	5.37173e+06	2.11683e+07	58492.9	11361.2	11.64	24.86	20.23	22.02		1.80463e+07	2.27144e+07	2.14414e+07	4.21854e+06	6.94806e+06	5.37173e+06	1.50545e+07	2.2463e+07	2.11683e+07
n/a	High	Master Protein	Q9NYU2-1	UDP-glucose:glycoprotein glucosyltransferase 1 [OS=Homo sapiens]		0	6	10	48	10	1555	177.1	5.63	29.31	metabolic process;regulation of biological process;response to stimulus	endoplasmic reticulum;organelle lumen	catalytic activity;protein binding	Pf06427	56886	ENSG00000136731.12	UGGT1	2		Protein processing in endoplasmic reticulum	ER Quality Control Compartment (ERQC)	7	12.974	100	100	100	2.33253e+07	9.22658e+06	3.78138e+07	212111	16348.4	16.42	10.99	21.83	42.23	95.07	2.13618e+07	2.91319e+07	2.33253e+07	8.93449e+06	1.09069e+07	9.22658e+06	2.52912e+07	3.78138e+07	3.83208e+07
n/a	High	Master Protein	P35606	Coatomer subunit beta' [OS=Homo sapiens]		0	8	8	54	8	906	102.4	5.27	34.59	transport	cytoplasm;cytosol;Golgi;membrane	protein binding;structural molecule activity	Pf00400, Pf04053	9276	ENSG00000184432.9	COPB2	3			COPI-dependent Golgi-to-ER retrograde traffic; COPI-mediated anterograde transport	11	25.421	100	100	100	9.67301e+07	4.71903e+07	9.43406e+07	114486	4503.53	24.75	26.08	10.76	17.53	69	9.67301e+07	7.4312e+07	1.22743e+08	3.89512e+07	6.46183e+07	4.71903e+07	7.79705e+07	9.47747e+07	9.43406e+07
n/a	High	Master Protein	P31151	Protein S100-A7 [OS=Homo sapiens]		0	24	3	26	3	101	11.5	6.77	23.14	cell differentiation;defense response;regulation of biological process;response to stimulus;transport	cytoplasm;cytosol;endoplasmic reticulum;extracellular;nucleus;organelle lumen	metal ion binding;protein binding	Pf01023	6278	ENSG00000143556.8	S100A7	1			Neutrophil degranulation; Metal sequestration by antimicrobial proteins	5	0.487	7.303	4.914	1.79	2.22894e+06	546419	1.49991e+06	148735	305204	9.07	46.49	43.22	71.63	46.61	2.22894e+06	2.11353e+06	2.516e+06	546419	224266	642267	654068	1.49991e+06	1.70002e+06
n/a	High	Master Protein	Q93084	Sarcoplasmic/endoplasmic reticulum calcium atpase 3 [OS=Homo sapiens]		0	17	16	74	9	1043	113.9	5.57	107.31	transport	endoplasmic reticulum;membrane;nucleus	catalytic activity;metal ion binding;nucleotide binding;transporter activity	Pf00122, Pf00689, Pf00690, Pf00702, Pf08282, Pf12710, Pf13246	489	ENSG00000074370.17	ATP2A3	17	Alzheimers Disease; Myometrial Relaxation and Contraction Pathways; Calcium Regulation in the Cardiac Cell	Alzheimer's disease; cGMP-PKG signaling pathway; Calcium signaling pathway; Pancreatic secretion	Ion homeostasis; Pre-NOTCH Processing in Golgi; Ion transport by P-type ATPases; Reduction of cytosolic Ca++ levels	21	100	100	100	100	2.4126e+07	6.82742e+06	4.05583e+07	1.10659e+06	7365.81	12.68	29.12	28.27	13.49	96.35	2.05528e+07	2.65343e+07	2.4126e+07	4.55387e+06	6.82742e+06	8.36268e+06	2.43462e+07	4.05583e+07	4.31131e+07
n/a	High	Master Protein	O75083	WD repeat-containing protein 1 [OS=Homo sapiens]		0	26	17	95	17	606	66.2	6.65	28.22	cell differentiation;cell organization and biogenesis;cellular component movement;metabolic process;regulation of biological process;transport	cytoplasm;cytoskeleton;cytosol;extracellular	protein binding	Pf00400, Pf04762, Pf08662, Pf14783	9948	ENSG00000071127.16	WDR1	4	Hypertrophy Model		Platelet degranulation	5	5.684	100	100	100	1.01839e+08	9.82364e+07	1.21353e+08	1.19097e+06	209537	18.81	28.52	22.79	9	53.95	7.54778e+07	1.09926e+08	1.01839e+08	7.8552e+07	1.37197e+08	9.82364e+07	8.02705e+07	1.21353e+08	1.24884e+08
n/a	High	Master Protein	P62910	60S ribosomal protein L32 [OS=Homo sapiens]		0	32	6	55	6	135	15.9	11.33	22.7	cell organization and biogenesis;metabolic process;response to stimulus;transport	cytosol;membrane;ribosome	RNA binding;structural molecule activity	Pf01655	6161	ENSG00000144713.12	RPL32	3	Cytoplasmic Ribosomal Proteins	Ribosome	Peptide chain elongation; Eukaryotic Translation Termination; Viral mRNA Translation; L13a-mediated translational silencing of Ceruloplasmin expression; Nonsense Mediated Decay (NMD) independent of the Exon Junction Complex (EJC); Selenocysteine synthesis; Nonsense Mediated Decay (NMD) enhanced by the Exon Junction Complex (EJC); GTP hydrolysis and joining of the 60S ribosomal subunit; Major path…	34	15.171	100	100	100	2.04655e+08	5.83728e+07	1.81608e+08	552969	36449.2	16.23	23.59	22.9	21.19	114.56	1.61815e+08	2.24314e+08	2.04655e+08	5.20967e+07	8.06987e+07	5.83728e+07	1.18854e+08	1.81608e+08	1.84187e+08
n/a	High	Master Protein	P52789	Hexokinase-2 [OS=Homo sapiens]		0	9	8	49	8	917	102.3	6.05	36.05	cell organization and biogenesis;cellular homeostasis;metabolic process;regulation of biological process;response to stimulus;transport	cytosol;membrane;mitochondrion	catalytic activity;nucleotide binding;protein binding	Pf00349, Pf03727	3099	ENSG00000159399.9	HK2	2	Glycolysis and Gluconeogenesis	Insulin signaling pathway; Metabolic pathways; Starch and sucrose metabolism; Carbon metabolism; Carbohydrate digestion and absorption; Type II diabetes mellitus; HIF-1 signaling pathway; Fructose and mannose metabolism; Neomycin, kanamycin and gentamicin biosynthesis; Galactose metabolism; Amino sugar and nucleotide sugar metabolism; Central carbon metabolism in cancer; Glycolysis / Gluconeogene…	Glycolysis	18	0.163	100	100	100	5.99014e+07	1.6256e+07	6.93891e+07	6200.07	38100.3	20.72	62.86	25.63	67.83	25.38	4.27553e+07	6.47726e+07	5.99014e+07	1.2256e+07	3.82263e+07	1.6256e+07	4.39468e+07	7.33265e+07	6.93891e+07
n/a	High	Master Protein	P39019	40S ribosomal protein S19 [OS=Homo sapiens]		0	32	5	102	5	145	16.1	10.32	62.48	cell differentiation;cell organization and biogenesis;cellular component movement;defense response;metabolic process;regulation of biological process;response to stimulus;transport	cytoplasm;cytosol;membrane;nucleus;ribosome	protein binding;RNA binding;structural molecule activity	Pf01090	6223	ENSG00000105372.6	RPS19	19	Cytoplasmic Ribosomal Proteins	Ribosome	Peptide chain elongation; Eukaryotic Translation Termination; Viral mRNA Translation; Formation of the ternary complex, and subsequently, the 43S complex; L13a-mediated translational silencing of Ceruloplasmin expression; Selenocysteine synthesis; Nonsense Mediated Decay (NMD) independent of the Exon Junction Complex (EJC); Nonsense Mediated Decay (NMD) enhanced by the Exon Junction Complex (EJC)…	38	1.092	100	100	100	2.03862e+08	5.75085e+07	2.33431e+08	198804	182132	9.28	11.78	17.59	9.61	109.01	2.03862e+08	1.78332e+08	2.14181e+08	4.96724e+07	6.29654e+07	5.75085e+07	1.88258e+08	2.6908e+08	2.33431e+08
n/a	High	Master Protein	P08133-1	annexin A6 [OS=Homo sapiens]		0	22	14	55	14	673	75.8	5.6	25.15	cell organization and biogenesis;cellular homeostasis;regulation of biological process;response to stimulus;transport	cytoplasm;membrane;mitochondrion	metal ion binding;nucleotide binding;protein binding;transporter activity	Pf00191	309	ENSG00000197043.13	ANXA6	5	Calcium Regulation in the Cardiac Cell; Prostaglandin Synthesis and Regulation		Smooth Muscle Contraction	4	37.149	100	100	100	1.45566e+07	1.96593e+07	1.36671e+07	1.28374e+06	34556.3	17.79	34.63	45.32	23.29	102.64	1.06993e+07	1.45566e+07	1.50766e+07	1.40615e+07	2.82649e+07	1.96593e+07	6.14905e+06	1.70107e+07	1.36671e+07
n/a	High	Master Protein	P05204	Non-histone chromosomal protein HMG-17 [OS=Homo sapiens]		0.007	17	3	37	3	90	9.4	9.99	3.54		chromosome;cytoplasm;nucleus	DNA binding;protein binding;RNA binding		3151	ENSG00000198830.10	HMGN2	1				0	48.343	100	100	100	6.4007e+07	4.99966e+07	1.00361e+08	634807	13131.4	7.21	48.63	10.97	35.79	56.4	6.66616e+07	5.78278e+07	6.4007e+07	5.11356e+07	1.7325e+07	4.99966e+07	9.5028e+07	1.16937e+08	1.00361e+08
n/a	High	Master Protein	P07942	Laminin subunit beta-1 [OS=Homo sapiens]		0	3	6	37	6	1786	197.9	4.94	33.84	cell differentiation;cell organization and biogenesis;cellular component movement;metabolic process;regulation of biological process;response to stimulus;transport	extracellular;membrane;organelle lumen	catalytic activity;motor activity;nucleotide binding;protein binding;signal transducer activity;structural molecule activity	Pf00015, Pf00053, Pf00055, Pf01576, Pf02841, Pf03938, Pf04156, Pf05103, Pf05335, Pf05667, Pf05698, Pf05701, Pf06428, Pf07111, Pf07767, Pf08317, Pf08647, Pf09731, Pf10174, Pf13476, Pf13514, Pf13851, Pf15346, Pf15619	3912	ENSG00000091136.13	LAMB1	7	Alpha 6 Beta 4 signaling pathway; Focal Adhesion; Focal Adhesion-PI3K-Akt-mTOR-signaling pathway; Inflammatory Response Pathway	Small cell lung cancer; PI3K-Akt signaling pathway; Toxoplasmosis; Amoebiasis; ECM-receptor interaction; Focal adhesion; Pathways in cancer	ECM proteoglycans; Post-translational protein phosphorylation; Regulation of Insulin-like Growth Factor (IGF) transport and uptake by Insulin-like Growth Factor Binding Proteins (IGFBPs); L1CAM interactions; Laminin interactions; Degradation of the extracellular matrix; MET activates PTK2 signaling; Non-integrin membrane-ECM interactions	28	29.752	100	100	100	2.82751e+07	5.942e+06	4.41857e+07	310071	10421.9	20.67	27.07	21.75	29.6	4.41	2.0044e+07	2.82751e+07	3.02539e+07	5.07706e+06	8.46065e+06	5.942e+06	3.15945e+07	4.41857e+07	4.91685e+07
n/a	High	Master Protein	P62913	60S ribosomal protein L11 [OS=Homo sapiens]		0	38	9	73	9	178	20.2	9.6	23.65	cell organization and biogenesis;metabolic process;regulation of biological process;transport	cytoplasm;cytosol;membrane;nucleus;ribosome	protein binding;RNA binding;structural molecule activity	Pf00281, Pf00673	6135	ENSG00000142676.12	RPL11	1	Cytoplasmic Ribosomal Proteins	Ribosome	Peptide chain elongation; Eukaryotic Translation Termination; Viral mRNA Translation; L13a-mediated translational silencing of Ceruloplasmin expression; Nonsense Mediated Decay (NMD) independent of the Exon Junction Complex (EJC); Selenocysteine synthesis; Nonsense Mediated Decay (NMD) enhanced by the Exon Junction Complex (EJC); GTP hydrolysis and joining of the 60S ribosomal subunit; Major path…	34	8.077	100	100	100	3.45288e+08	1.4676e+08	3.95342e+08	105130	13015.3	12.81	23.06	19.97	28.59	117.9	2.90018e+08	3.75011e+08	3.45288e+08	1.26474e+08	1.96663e+08	1.4676e+08	2.74148e+08	3.99329e+08	3.95342e+08
n/a	High	Master Protein	P34897-1	Serine hydroxymethyltransferase, mitochondrial [OS=Homo sapiens]		0	18	7	44	7	504	56	8.53	29.85	cell organization and biogenesis;metabolic process;regulation of biological process;response to stimulus	cytoplasm;cytoskeleton;membrane;mitochondrion;nucleus;organelle lumen	catalytic activity;protein binding	Pf00464	6472	ENSG00000182199.10	SHMT2	12	Vitamin B12 Metabolism; Folate Metabolism; One Carbon Metabolism; Trans-sulfuration and one carbon metabolism; One carbon metabolism and related pathways	Glyoxylate and dicarboxylate metabolism; Biosynthesis of amino acids; Carbon metabolism; One carbon pool by folate; Glycine, serine and threonine metabolism; Metabolic pathways; Antifolate resistance	Metabolism of folate and pterines	16	0.659	100	100	100	2.35825e+07	1.33776e+07	3.04286e+07	25573.3	38811.9	13.84	11.93	20.44	96.67	84.04	1.88291e+07	2.35825e+07	2.46334e+07	1.22176e+07	1.54402e+07	1.33776e+07	2.26015e+07	3.42749e+07	3.04286e+07
n/a	High	Master Protein	Q86VP6-1	cullin-associated nedd8-dissociated protein 1 [OS=Homo sapiens]		0	9	13	58	13	1230	136.3	5.78	26.74	cell differentiation;cell organization and biogenesis;cellular homeostasis;metabolic process;regulation of biological process;transport	cytoplasm;cytosol;extracellular;Golgi;membrane;nucleus;organelle lumen	protein binding	Pf08623, Pf12755, Pf13513	55832	ENSG00000111530.12	CAND1	12	Endoderm Differentiation		Neutrophil degranulation; Iron uptake and transport; Neddylation	9	4.975	100	100	100	1.92229e+08	1.36147e+08	5.1634e+08	300324	60367.7	10.36	19.7	25.09	21.38	46.53	1.71254e+08	2.10897e+08	1.92229e+08	1.36147e+08	1.068e+08	1.59535e+08	3.37941e+08	5.1634e+08	5.62135e+08
n/a	High	Master Protein	Q8NE86	Calcium uniporter protein, mitochondrial [OS=Homo sapiens]		0	17	6	64	6	351	39.8	8.65	29.26	cell organization and biogenesis;cellular homeostasis;defense response;metabolic process;regulation of biological process;response to stimulus;transport	membrane;mitochondrion	catalytic activity;protein binding;transporter activity	Pf04678	90550	ENSG00000156026.14	MCU	10		NOD-like receptor signaling pathway; Calcium signaling pathway	Processing of SMDT1	5	100	100	100	100	6.53589e+07	2.11545e+07	7.08894e+07	41540.4		11.56	17.11	23.6	51.21		5.39377e+07	6.53589e+07	6.72082e+07	1.68085e+07	2.11545e+07	2.3779e+07	4.90308e+07	7.94474e+07	7.08894e+07
n/a	High	Master Protein	P46087	Probable 28S rRNA (cytosine(4447)-C(5))-methyltransferase [OS=Homo sapiens]		0	9	6	63	6	812	89.2	9.23	37.77	cell organization and biogenesis;metabolic process;regulation of biological process	nucleus	catalytic activity;protein binding;RNA binding	Pf01189, Pf12847	4839	ENSG00000111641.11	NOP2	12	Imatinib and Chronic Myeloid Leukemia		TFAP2A acts as a transcriptional repressor during retinoic acid induced cell differentiation; rRNA modification in the nucleus and cytosol	10	1.202	100	100	100	5.46479e+07	2.63348e+07	4.52483e+07	18779.1	15629.4	12.84	10.23	6.97	21.12	82.86	5.46479e+07	4.77574e+07	6.18172e+07	2.32226e+07	2.63348e+07	2.85199e+07	4.20654e+07	4.83679e+07	4.52483e+07
n/a	High	Master Protein	Q96CW1-2	Isoform 2 of AP-2 complex subunit mu [OS=Homo sapiens]		0	17	9	45	9	433	49.4	9.54	21.34	cell organization and biogenesis;cellular component movement;metabolic process;regulation of biological process;response to stimulus;transport	cytosol;membrane	protein binding;transporter activity	Pf00928	1173	ENSG00000161203.13	AP2M1	3	Synaptic Vesicle Pathway; EGF/EGFR Signaling Pathway		Trafficking of GluR2-containing AMPA receptors	8	99.072	100	100	100	8.95749e+07	6.58488e+07	1.40867e+08	2.61394e+06	26384.3	11.66	24.2	27.77	24.29	72.23	7.70865e+07	8.95749e+07	9.74504e+07	5.62622e+07	8.94235e+07	6.58488e+07	9.2842e+07	1.40867e+08	1.65499e+08
n/a	High	Master Protein	P63241-2	Isoform 2 of Eukaryotic translation initiation factor 5A-1 [OS=Homo sapiens]		0.001	21	3	30	3	184	20.2	7.01	9.73	cell death;cellular homeostasis;metabolic process;regulation of biological process;response to stimulus;transport	cytoplasm;cytosol;membrane;nucleus	protein binding;RNA binding	Pf01287	1984	ENSG00000132507.17	EIF5A	17	Translation Factors; eIF5A regulation in response to inhibition of the nuclear export system			2	0.331	100	100	66.013	4.19754e+07	2.56394e+07	5.06584e+07	128428	388400	17.65	36.79	23.34	33.4	38.06	3.33992e+07	4.19754e+07	4.78049e+07	2.17867e+07	4.25281e+07	2.56394e+07	3.64386e+07	5.06584e+07	5.88937e+07
n/a	High	Master Protein	Q13347	Eukaryotic translation initiation factor 3 subunit I [OS=Homo sapiens]		0	21	6	60	6	325	36.5	5.64	47.71	cell organization and biogenesis;metabolic process;regulation of biological process	cytoplasm;cytosol	protein binding;RNA binding	Pf00400	8668	ENSG00000084623.11	EIF3I	1	Translation Factors	RNA transport	Formation of the ternary complex, and subsequently, the 43S complex; L13a-mediated translational silencing of Ceruloplasmin expression; Translation initiation complex formation; GTP hydrolysis and joining of the 60S ribosomal subunit; Formation of a pool of free 40S subunits; Ribosomal scanning and start codon recognition	13	0.01	100	100	100	4.66268e+07	1.45149e+07	3.15669e+07		31605	13.07	10.18	19.23			4.66268e+07	4.53709e+07	5.72097e+07	1.29215e+07	1.5856e+07	1.45149e+07	2.34251e+07	3.15669e+07	3.44954e+07
n/a	High	Master Protein	P62854	40S ribosomal protein S26 [OS=Homo sapiens]		0	43	6	40	6	115	13	11	29.1	cell organization and biogenesis;metabolic process;regulation of biological process;transport	cytosol;membrane;ribosome	protein binding;RNA binding;structural molecule activity	Pf01283	6231; 101929876; 728937	ENSG00000197728.9	RPS26; LOC101929876; RPS26P25	12; 20; 4	Cytoplasmic Ribosomal Proteins	Ribosome	Peptide chain elongation; Eukaryotic Translation Termination; Viral mRNA Translation; Formation of the ternary complex, and subsequently, the 43S complex; L13a-mediated translational silencing of Ceruloplasmin expression; Selenocysteine synthesis; Nonsense Mediated Decay (NMD) independent of the Exon Junction Complex (EJC); Nonsense Mediated Decay (NMD) enhanced by the Exon Junction Complex (EJC)…	38	2.057	100	100	100	4.16958e+07	4.96303e+06	3.29229e+07	23773.3	11556.5	16.03	13.17	14.79	42.49	134.02	4.16958e+07	3.26751e+07	4.50007e+07	4.26143e+06	4.96303e+06	5.55837e+06	2.56675e+07	3.29229e+07	3.41101e+07
n/a	High	Master Protein	P32320	cytidine deaminase [OS=Homo sapiens]		0	29	3	29	3	146	16.2	6.92	44.67	cell organization and biogenesis;metabolic process;regulation of biological process;response to stimulus;transport	cytosol;extracellular;organelle lumen	catalytic activity;metal ion binding;protein binding	Pf00383, Pf08211, Pf14421	978	ENSG00000158825.5	CDA	1	Fluoropyrimidine Activity	Pyrimidine metabolism; Drug metabolism - other enzymes; Metabolic pathways	Pyrimidine salvage; Neutrophil degranulation	11	0.457	1.819	1.42	1.909	9.00114e+06	9.45087e+06	7.02921e+06	2.26106e+06	4.94952e+06	3.82	17.79	25.91	63.9	25.45	9.00114e+06	9.56621e+06	8.92441e+06	7.11166e+06	1.01293e+07	9.45087e+06	4.68713e+06	7.02921e+06	8.00003e+06
n/a	High	Master Protein	P63208	s-phase kinase-associated protein 1 [OS=Homo sapiens]		0	21	4	32	4	163	18.6	4.54	25.98	cell organization and biogenesis;cellular homeostasis;metabolic process;regulation of biological process;response to stimulus	cytoplasm;cytosol;nucleus	catalytic activity;protein binding	Pf01466, Pf03931	6500	ENSG00000113558.18	SKP1	5	TNF alpha Signaling Pathway; TGF-beta Signaling Pathway; Notch Signaling Pathway	Protein processing in endoplasmic reticulum; Circadian rhythm; TGF-beta signaling pathway; Cell cycle; Wnt signaling pathway; Ubiquitin mediated proteolysis; Herpes simplex infection; Oocyte meiosis	FBXL7 down-regulates AURKA during mitotic entry and in early mitosis; NOTCH1 Intracellular Domain Regulates Transcription; Downstream TCR signaling; Regulation of PLK1 Activity at G2/M Transition; NIK-->noncanonical NF-kB signaling; Constitutive Signaling by NOTCH1 HD+PEST Domain Mutants; MAP3K8 (TPL2)-dependent MAPK1/3 activation; Antigen processing: Ubiquitination & Proteasome degradation; Iron…	105	4.589	100	61.266	41.155	1.84216e+07	5.39358e+06	8.02922e+06	601394	131055	24.38	24.8	21.9	28.99	92.48	2.39946e+07	1.84216e+07	1.47668e+07	4.0826e+06	5.39358e+06	6.76843e+06	8.93503e+06	8.02922e+06	5.72317e+06
n/a	High	Master Protein	Q9Y6N5	Sulfide:quinone oxidoreductase, mitochondrial [OS=Homo sapiens]		0	9	4	44	4	450	49.9	9.11	48.91	metabolic process	membrane;mitochondrion	catalytic activity	Pf07992, Pf13738	58472	ENSG00000137767.13	SQRDL; SQOR	15		Sulfur metabolism	Sulfide oxidation to sulfate	6	100	100	100	100	1.1536e+07	4.06155e+06	1.54393e+07	9917.01		21.05	44.44	27.26	33.12		8.14193e+06	1.1536e+07	1.23986e+07	2.94591e+06	6.9525e+06	4.06155e+06	9.42515e+06	1.54393e+07	1.62789e+07
n/a	High	Master Protein	P46939	Utrophin [OS=Homo sapiens]		0	4	15	64	15	3433	394.2	5.33	33.01	cell organization and biogenesis;regulation of biological process;response to stimulus	cytoplasm;cytoskeleton;membrane	metal ion binding;protein binding	Pf00307, Pf00397, Pf00435, Pf00569, Pf09068, Pf09069, Pf11971	7402	ENSG00000152818.18	UTRN	6	Primary Focal Segmental Glomerulosclerosis FSGS			1	6.89	100	100	100	4.62864e+08	2.99545e+08	5.60186e+08	469959	68211.9	19.62	27.23	25.08	13.57	99.97	3.23922e+08	4.69415e+08	4.62864e+08	2.3388e+08	4.0239e+08	2.99545e+08	3.47848e+08	5.60977e+08	5.60186e+08
n/a	High	Master Protein	O95477	ATP-binding cassette sub-family A member 1 [OS=Homo sapiens]		0	4	8	50	8	2261	254.1	6.86	30.46	cell organization and biogenesis;metabolic process;regulation of biological process;response to stimulus;transport	cell surface;Golgi;membrane	catalytic activity;nucleotide binding;protein binding;receptor activity;signal transducer activity;transporter activity	Pf00005, Pf12698, Pf13304, Pf13732	19	ENSG00000165029.15	ABCA1	9	Selenium Micronutrient Network; Vitamin B12 Metabolism; Folate Metabolism; SREBF and miR33 in cholesterol and lipid homeostasis; Nuclear Receptors in Lipid Metabolism and Toxicity; Statin Pathway	Fat digestion and absorption; ABC transporters	Defective ABCA1 causes Tangier disease; PPARA activates gene expression; HDL assembly	20	0.365	100	100	100	5.38733e+07	6.69712e+06	3.752e+07	13335.8	36546.8	23.68	40.9	27.32	7.53		3.52241e+07	5.60923e+07	5.38733e+07	4.8971e+06	1.08662e+07	6.69712e+06	2.23138e+07	3.79425e+07	3.752e+07
n/a	High	Master Protein	P60842	Eukaryotic initiation factor 4A-I [OS=Homo sapiens]		0	18	7	59	3	406	46.1	5.48	28.09	metabolic process;regulation of biological process	cytoplasm;cytosol;membrane;nucleus	catalytic activity;DNA binding;nucleotide binding;protein binding;RNA binding	Pf00270, Pf00271, Pf04851	1973	ENSG00000161960.14	EIF4A1	17	Translation Factors; Interferon type I signaling pathways	RNA transport	ISG15 antiviral mechanism; L13a-mediated translational silencing of Ceruloplasmin expression; Translation initiation complex formation; GTP hydrolysis and joining of the 60S ribosomal subunit; Deadenylation of mRNA; Ribosomal scanning and start codon recognition	20	1.62	100	100	100	1.38533e+07	1.26426e+07	7.75991e+06	40649.6	25086	13.37	24.82	24.41	42.88	121.73	1.14036e+07	1.48853e+07	1.38533e+07	1.26426e+07	1.87229e+07	1.2302e+07	5.06408e+06	8.24716e+06	7.75991e+06
n/a	High	Master Protein	P61204	ADP-ribosylation factor 3 [OS=Homo sapiens]		0	31	4	24	3	181	20.6	7.43	30.08	metabolic process;regulation of biological process;response to stimulus;transport	cytoplasm;Golgi;membrane	catalytic activity;nucleotide binding;protein binding;signal transducer activity	Pf00025, Pf00071, Pf00503, Pf01926, Pf04670, Pf08477, Pf09439	377	ENSG00000134287.9	ARF3	12		Endocytosis	Synthesis of PIPs at the Golgi membrane; COPI-dependent Golgi-to-ER retrograde traffic; COPI-mediated anterograde transport	17	3.679	100	100	85.489	3.03371e+06	1.01092e+06	2.85853e+06	43507.9	11825.2	29.92	44.67	57.54	4.51	135.19	2.04512e+06	3.03371e+06	3.81514e+06	551144	1.44707e+06	1.01092e+06	926668	2.85853e+06	3.75815e+06
n/a	High	Master Protein	P29508	Serpin B3 [OS=Homo sapiens]		0	28	10	37	4	390	44.5	6.81	18.01	cell communication;regulation of biological process;transport	cytoplasm;extracellular;nucleus;organelle lumen	enzyme regulator activity;protein binding;receptor activity	Pf00079	6317	ENSG00000057149.15	SERPINB3	18		Amoebiasis	Neutrophil degranulation	4	0.603	21.411	3.22	4.354	4.11208e+06	836148	618500	115738	192056	100.05	53.17	90.06	66.03	114.99	869825	1.17215e+07	4.11208e+06	836148	1.85246e+06	757391	618500	557507	2.49711e+06
n/a	High	Master Protein	P62244	40S ribosomal protein S15a [OS=Homo sapiens]		0	52	7	76	7	130	14.8	10.13	20.57	cell organization and biogenesis;metabolic process;regulation of biological process;response to stimulus;transport	cytoplasm;cytosol;membrane;mitochondrion;ribosome	protein binding;RNA binding;structural molecule activity	Pf00410	6210	ENSG00000134419.15	RPS15A	16	Cytoplasmic Ribosomal Proteins	Ribosome	Peptide chain elongation; Eukaryotic Translation Termination; Viral mRNA Translation; Formation of the ternary complex, and subsequently, the 43S complex; L13a-mediated translational silencing of Ceruloplasmin expression; Selenocysteine synthesis; Nonsense Mediated Decay (NMD) independent of the Exon Junction Complex (EJC); Nonsense Mediated Decay (NMD) enhanced by the Exon Junction Complex (EJC)…	38	6.464	100	100	100	2.85004e+08	1.8193e+08	3.66449e+08	1.28609e+06	198960	9.39	12.91	22.99	7.55	37.57	2.62879e+08	2.85004e+08	3.16741e+08	1.50475e+08	1.94498e+08	1.8193e+08	2.37685e+08	3.66598e+08	3.66449e+08
n/a	High	Master Protein	P84098	60S ribosomal protein L19 [OS=Homo sapiens]		0	31	9	62	9	196	23.5	11.47	23.8	cell organization and biogenesis;metabolic process;transport	cytosol;membrane;ribosome	protein binding;RNA binding;structural molecule activity	Pf01280	6143	ENSG00000108298.9	RPL19	17	Cytoplasmic Ribosomal Proteins	Ribosome	Peptide chain elongation; Eukaryotic Translation Termination; Viral mRNA Translation; L13a-mediated translational silencing of Ceruloplasmin expression; Nonsense Mediated Decay (NMD) independent of the Exon Junction Complex (EJC); Selenocysteine synthesis; Nonsense Mediated Decay (NMD) enhanced by the Exon Junction Complex (EJC); GTP hydrolysis and joining of the 60S ribosomal subunit; Major path…	34	10.699	100	100	100	5.18164e+08	2.55064e+08	4.86433e+08	113113	10571.9	17.52	16.46	26.31	52.62	164.72	4.20709e+08	6.00215e+08	5.18164e+08	2.35497e+08	3.20466e+08	2.55064e+08	3.01659e+08	4.86433e+08	5.09004e+08
n/a	High	Master Protein	Q9Y336	Sialic acid-binding Ig-like lectin 9 [OS=Homo sapiens]		0	8	3	16	3	463	50.1	7.25	23.4	regulation of biological process;response to stimulus;transport	membrane		Pf08205	27180	ENSG00000129450.8	SIGLEC9	19			Neutrophil degranulation; Immunoregulatory interactions between a Lymphoid and a non-Lymphoid cell	5	100	100	100	100	1.86017e+06	501404	2.06246e+06	79204.7		27.74		40.24	61.15		1.14987e+06	1.86017e+06	2.02706e+06		501404		922230	2.06246e+06	2.17019e+06
n/a	High	Master Protein	Q9BQE3	Tubulin alpha-1C chain [OS=Homo sapiens]		0	49	20	142	3	449	49.9	5.1	288.93	cell division;cell organization and biogenesis;transport	cytoplasm;cytoskeleton;nucleus	catalytic activity;nucleotide binding;protein binding;structural molecule activity	Pf00091, Pf03953	84790	ENSG00000167553.15	TUBA1C	12	Pathogenic Escherichia coli infection; Parkin-Ubiquitin Proteasomal System pathway	Gap junction; Apoptosis; Phagosome; Pathogenic Escherichia coli infection	COPI-independent Golgi-to-ER retrograde traffic; COPI-dependent Golgi-to-ER retrograde traffic; Carboxyterminal post-translational modifications of tubulin; Recruitment of NuMA to mitotic centrosomes; Hedgehog 'off' state; Translocation of GLUT4 to the plasma membrane; Prefoldin mediated transfer of substrate to CCT/TriC; Microtubule-dependent trafficking of connexons from Golgi to the plasma mem…	66	0.01	100	100	100	3.60479e+06	322138	4.75656e+06		1443.29	23.58	78.52	30.38		3.91	3.60479e+06	5.12968e+06	3.37957e+06	86073.8	626045	322138	2.77388e+06	4.75656e+06	5.19003e+06
n/a	High	Master Protein	P20701-2	Isoform 2 of Integrin alpha-L [OS=Homo sapiens]		0	10	13	45	13	1223	134.3	5.63	20.47	cell organization and biogenesis;cellular component movement;defense response;regulation of biological process;response to stimulus;transport	cell surface;membrane	metal ion binding;protein binding;receptor activity;signal transducer activity	Pf00092, Pf01839, Pf08441, Pf13517, Pf13519	3683		ITGAL	16	Integrin-mediated Cell Adhesion; Focal Adhesion			2	16.639	100	100	100	2.03678e+07	2.34445e+07	3.14613e+07	951810	57203.8	16.94	17.16	28.29	38.69	48.93	1.99322e+07	2.03678e+07	2.66914e+07	1.79296e+07	2.52437e+07	2.34445e+07	1.83014e+07	3.17714e+07	3.14613e+07
n/a	High	Master Protein	P26373-1	60S ribosomal protein L13 [OS=Homo sapiens]		0	23	6	42	6	211	24.2	11.65	31.71	cell organization and biogenesis;metabolic process;transport	cytosol;membrane;nucleus;ribosome	protein binding;RNA binding;structural molecule activity	Pf01294	6137	ENSG00000167526.13	RPL13	16	Cytoplasmic Ribosomal Proteins	Ribosome	Peptide chain elongation; Eukaryotic Translation Termination; Viral mRNA Translation; L13a-mediated translational silencing of Ceruloplasmin expression; Nonsense Mediated Decay (NMD) independent of the Exon Junction Complex (EJC); Selenocysteine synthesis; Nonsense Mediated Decay (NMD) enhanced by the Exon Junction Complex (EJC); GTP hydrolysis and joining of the 60S ribosomal subunit; Major path…	34	1.273	100	100	31.521	5.05236e+07	585353	7.50797e+07	23647.5	18570.4	20.07	30.78	26.33	45.41	171.68	4.42942e+07	5.05236e+07	6.51369e+07		730241	469213	4.6396e+07	7.50797e+07	7.81623e+07
n/a	High	Master Protein	P84103	Serine/arginine-rich splicing factor 3 [OS=Homo sapiens]		0	40	6	56	6	164	19.3	11.65	31.48	metabolic process;regulation of biological process;transport	cytoplasm;nucleus	protein binding;RNA binding	Pf00076, Pf13893, Pf14259	6428	ENSG00000112081.16	SRSF3	6	mRNA Processing	Spliceosome; Herpes simplex infection	Cleavage of Growing Transcript in the Termination Region ; Transport of Mature mRNA derived from an Intron-Containing Transcript; mRNA 3'-end processing; mRNA Splicing - Major Pathway	14	100	100	100	100	2.38335e+07	2.833e+07	2.32102e+07	103068		21.55	9.48	24.83	27.06		1.59521e+07	2.38335e+07	2.39247e+07	2.39708e+07	2.84507e+07	2.833e+07	2.29606e+07	3.46727e+07	2.32102e+07
n/a	High	Master Protein	Q13185	chromobox protein homolog 3 [OS=Homo sapiens]		0	28	4	43	4	183	20.8	5.33	46.57	cell organization and biogenesis;metabolic process;regulation of biological process	chromosome;membrane;nucleus	protein binding	Pf00385, Pf01393	11335; 90416	ENSG00000122565.18	CBX3; C15orf57; CCDC32	7; 15	Exercise-induced Circadian Regulation		RNA Polymerase I Chain Elongation; ERCC6 (CSB) and EHMT2 (G9a) positively regulate rRNA expression; Transcriptional Regulation by E2F6	10	2.711	100	100	100	1.75789e+07	8.51519e+06	2.85426e+07	19247	7100.84	19.66	31.23	28.83	74.58	29.16	1.25709e+07	1.75789e+07	1.84929e+07	5.85768e+06	1.1178e+07	8.51519e+06	1.83711e+07	2.85426e+07	3.35413e+07
n/a	High	Master Protein	P23588	eukaryotic translation initiation factor 4B [OS=Homo sapiens]		0	10	5	39	5	611	69.1	5.73	33.77	cell organization and biogenesis;metabolic process;regulation of biological process	cytosol	catalytic activity;protein binding;RNA binding	Pf00076, Pf14259	1975	ENSG00000063046.17	EIF4B	12	Translation Factors; Focal Adhesion-PI3K-Akt-mTOR-signaling pathway; Interferon type I signaling pathways	mTOR signaling pathway; PI3K-Akt signaling pathway; RNA transport; Proteoglycans in cancer	mTORC1-mediated signalling; L13a-mediated translational silencing of Ceruloplasmin expression; Translation initiation complex formation; GTP hydrolysis and joining of the 60S ribosomal subunit; Deadenylation of mRNA; Ribosomal scanning and start codon recognition	22	0.01	100	100	34.419	2.96894e+07	4.11013e+06	3.08611e+07		119415	10.23	14.67	16.21		125.6	2.96894e+07	2.59305e+07	3.18184e+07	4.11013e+06	4.95083e+06	3.72815e+06	2.3694e+07	3.2562e+07	3.08611e+07
n/a	High	Master Protein	O75746	Calcium-binding mitochondrial carrier protein Aralar1 [OS=Homo sapiens]		0	15	9	78	6	678	74.7	8.38	53.9	metabolic process;response to stimulus;transport	membrane;mitochondrion	metal ion binding;transporter activity	Pf00153, Pf13499	8604	ENSG00000115840.13	SLC25A12	2			Gluconeogenesis; Mitochondrial protein import; Metabolism of proteins	6	5.32	100	100	100	5.42941e+07	1.94849e+07	5.65047e+07	91005.2	17107.7	18.53	20.6	31.8	14.7	58.01	3.91384e+07	5.42941e+07	5.57997e+07	1.56842e+07	2.37721e+07	1.94849e+07	3.22201e+07	5.65047e+07	6.24883e+07
n/a	High	Master Protein	Q13557	Calcium/calmodulin-dependent protein kinase type II subunit delta [OS=Homo sapiens]		0	17	10	58	9	499	56.3	7.25	40.65	cell differentiation;cell organization and biogenesis;cellular component movement;cellular homeostasis;metabolic process;regulation of biological process;response to stimulus	cytoplasm;cytosol;endoplasmic reticulum;membrane;nucleus	catalytic activity;nucleotide binding;protein binding	Pf00069, Pf07714, Pf08332, Pf12680, Pf13474, Pf14534	817	ENSG00000145349.16	CAMK2D	4	Physiological and Pathological Hypertrophy of the Heart; MicroRNAs in cardiomyocyte hypertrophy; SRF and miRs in Smooth Muscle Differentiation and Proliferation; Cardiac Hypertrophic Response; Myometrial Relaxation and Contraction Pathways; Calcium Regulation in the Cardiac Cell	HIF-1 signaling pathway; Tuberculosis; Axon guidance; Insulin secretion; Gastric acid secretion; Circadian entrainment; Proteoglycans in cancer; Neurotrophin signaling pathway; Glucagon signaling pathway; Cholinergic synapse; Dopaminergic synapse; Glioma; GnRH signaling pathway; ErbB signaling pathway; Oocyte meiosis; Oxytocin signaling pathway; Wnt signaling pathway; cAMP signaling pathway; Infl…	Ion homeostasis; HSF1-dependent transactivation; Interferon gamma signaling; Phase 0 - rapid depolarisation; Ras activation uopn Ca2+ infux through NMDA receptor; Ion transport by P-type ATPases; Unblocking of NMDA receptor, glutamate binding and activation; Trafficking of AMPA receptors; CREB phosphorylation through the activation of CaMKII; RAF/MAP kinase cascade; Interleukin-20 family signaling	64	7.842	100	100	100	1.09353e+08	1.69939e+07	7.85477e+07	229779	29302.4	15.83	32.74	22.71	24.22	44.36	9.33413e+07	1.28226e+08	1.09353e+08	1.53794e+07	2.74001e+07	1.69939e+07	5.34867e+07	7.85477e+07	8.42839e+07
n/a	High	Master Protein	O75116	Rho-associated protein kinase 2 [OS=Homo sapiens]		0	10	13	47	13	1388	160.8	6.02	31.87	cell organization and biogenesis;metabolic process;regulation of biological process;response to stimulus	cytoplasm;cytoskeleton;cytosol;membrane;nucleus	catalytic activity;metal ion binding;motor activity;nucleotide binding;protein binding;RNA binding;structural molecule activity	Pf00069, Pf00130, Pf01576, Pf01636, Pf02185, Pf02463, Pf04111, Pf04156, Pf05557, Pf05622, Pf05667, Pf06160, Pf07714, Pf07888, Pf08912, Pf09726, Pf09731, Pf11559, Pf12128, Pf12718, Pf12795, Pf13166, Pf14531, Pf14915	9475	ENSG00000134318.13	ROCK2	2	Androgen receptor signaling pathway; MicroRNAs in cardiomyocyte hypertrophy; Integrin-mediated Cell Adhesion; Leptin signaling pathway; Pathogenic Escherichia coli infection; Spinal Cord Injury; Focal Adhesion; Association Between Physico-Chemical Features and Toxicity Associated Pathways; VEGFA-VEGFR2 Signaling Pathway; Chemokine signaling pathway; Regulation of Actin Cytoskeleton; G13 Signaling…	cAMP signaling pathway; Leukocyte transendothelial migration; Wnt signaling pathway; Pathogenic Escherichia coli infection; Chemokine signaling pathway; Salmonella infection; Oxytocin signaling pathway; Platelet activation; Focal adhesion; Axon guidance; Pathways in cancer; Sphingolipid signaling pathway; cGMP-PKG signaling pathway; Regulation of actin cytoskeleton; Vascular smooth muscle contrac…	EPHA-mediated growth cone collapse; G alpha (12/13) signalling events; EPHB-mediated forward signaling; RHO GTPases Activate ROCKs; Sema4D induced cell migration and growth-cone collapse; VEGFA-VEGFR2 Pathway	47	12.062	100	100	100	3.93073e+07	8.37366e+06	1.152e+07	462651	38354.6	13.03	33.96	35.21	53.79	47.75	3.13841e+07	4.0074e+07	3.93073e+07	5.61035e+06	1.13436e+07	8.37366e+06	7.72112e+06	1.152e+07	1.59806e+07
n/a	High	Master Protein	O75475-1	PC4 and SFRS1-interacting protein [OS=Homo sapiens]		0	13	6	26	6	530	60.1	9.13	26.61	cell organization and biogenesis;metabolic process;regulation of biological process;response to stimulus;transport	cytosol;nucleus	DNA binding;metal ion binding;protein binding;RNA binding	Pf00855, Pf11467	11168	ENSG00000164985.14	PSIP1	9			2-LTR circle formation; APOBEC3G mediated resistance to HIV-1 infection; Integration of viral DNA into host genomic DNA; Vpr-mediated nuclear import of PICs; Autointegration results in viral DNA circles	13	1.253	100	100	100	7.97796e+06	4.10335e+06	7.85167e+06	11068.4	8835.45	8.8	31.44	33.32	73.68	55.41	7.97796e+06	7.07401e+06	8.42518e+06	3.37121e+06	6.12298e+06	4.10335e+06	5.8967e+06	7.85167e+06	1.14085e+07
n/a	High	Master Protein	O60234	glia maturation factor gamma [OS=Homo sapiens]		0	32	4	32	4	142	16.8	5.26	17.51	metabolic process;regulation of biological process;transport	extracellular;organelle lumen	enzyme regulator activity;protein binding	Pf00241	9535	ENSG00000130755.12	GMFG	19			Neutrophil degranulation	3	100	100	100	100	470855	6.48672e+06	1.77943e+06	905737	2959.7	24.87	33.21	20.65	6.77	7.57	357149	470855	592602	4.8337e+06	9.3574e+06	6.48672e+06	1.30966e+06	1.99386e+06	1.77943e+06
n/a	High	Master Protein	P48637	glutathione synthetase [OS=Homo sapiens]		0.001	12	6	19	6	474	52.4	5.92	7.53	metabolic process;response to stimulus	cytosol	catalytic activity;metal ion binding;nucleotide binding;protein binding	Pf03199, Pf03917	2937	ENSG00000100983.9	GSS	20	Glutathione metabolism; Trans-sulfuration and one carbon metabolism; Amino Acid metabolism; One carbon metabolism and related pathways; Metapathway biotransformation	Metabolic pathways; Cysteine and methionine metabolism; Glutathione metabolism	Glutathione synthesis and recycling; Defective GSS causes Glutathione synthetase deficiency (GSS deficiency)	17	4.004	100	100	100	4.31208e+07	3.70448e+06	1.85152e+07	47743	11924.2	15.24	24.12	23.27	39.03	132.96	3.59171e+07	4.88845e+07	4.31208e+07	4.12956e+06	3.70448e+06	2.52271e+06	1.31306e+07	1.85152e+07	2.11733e+07
n/a	High	Master Protein	Q13838-2	Isoform 2 of Spliceosome RNA helicase DDX39B [OS=Homo sapiens]		0	16	9	53	8	443	50.6	5.88	17.6	cell organization and biogenesis;metabolic process;regulation of biological process;transport	cytoplasm;nucleus;spliceosomal complex	catalytic activity;nucleotide binding;protein binding;RNA binding	Pf00270, Pf00271, Pf14617	7919		DDX39B	6				0	0.434	100	100	100	7.65252e+07	8.30485e+07	1.83091e+08	36922.1	85155.7	17.77	51.49	22.9	43.22		9.48468e+07	7.65252e+07	6.70604e+07	3.48767e+07	1.13777e+08	8.30485e+07	1.20724e+08	1.83091e+08	1.88153e+08
n/a	High	Master Protein	Q15233	Non-POU domain-containing octamer-binding protein [OS=Homo sapiens]		0	17	8	38	8	471	54.2	8.95	33.76	defense response;metabolic process;regulation of biological process;response to stimulus	membrane;nucleus	DNA binding;protein binding;RNA binding	Pf00076, Pf08075, Pf13893, Pf14259	4841	ENSG00000147140.15	NONO	X	mRNA Processing			1	3.773	100	100	100	1.1688e+08	3.22811e+07	1.01626e+08	144428	38277.5	6.45	39.31	17.11	64.93	77.02	1.06575e+08	1.20932e+08	1.1688e+08	3.22811e+07	5.38308e+07	2.58219e+07	7.65614e+07	1.07068e+08	1.01626e+08
n/a	High	Master Protein	Q9NVI7-2	Isoform 2 of ATPase family AAA domain-containing protein 3A [OS=Homo sapiens]		0	10	7	70	7	586	66.2	9.25	61.81	cell growth;regulation of biological process	membrane;mitochondrion	catalytic activity;nucleotide binding;RNA binding	Pf00004, Pf00910, Pf01078, Pf05707, Pf06745, Pf07728, Pf12037, Pf13207, Pf13401	55210	ENSG00000197785.13	ATAD3A	1				0	3.318	100	100	100	7.75779e+07	2.42032e+07	7.98361e+07	52166.1	15723.6	21.12	22.38	22.62		72.99	5.61049e+07	8.61428e+07	7.75779e+07	1.98273e+07	3.093e+07	2.42032e+07	5.40842e+07	7.98361e+07	8.48011e+07
n/a	High	Master Protein	O95197-2	Isoform 2 of Reticulon-3 [OS=Homo sapiens]		0.009	6	4	21	4	1013	110.6	4.97	2.13	cell death;cell organization and biogenesis;regulation of biological process;transport	endoplasmic reticulum;membrane	protein binding	Pf02453, Pf04093	10313	ENSG00000133318.13	RTN3	11				0	13.382	100	100	100	9.76249e+07	5.71273e+07	1.17354e+08	123123	9200.4	25.48	30.95	31.35	45.59	80.89	6.23509e+07	9.76249e+07	1.03962e+08	4.6011e+07	8.34932e+07	5.71273e+07	6.4992e+07	1.17354e+08	1.22654e+08
n/a	High	Master Protein	Q9BTV4	Transmembrane protein 43 [OS=Homo sapiens]		0	21	7	61	7	400	44.8	8.13	36.77	cell organization and biogenesis	endoplasmic reticulum;Golgi;membrane;nucleus;organelle lumen	protein binding	Pf07787	79188	ENSG00000170876.7	TMEM43	3				0	5.228	100	100	100	2.35067e+07	9.23664e+06	1.78479e+07	138432	26477.5	10.67	21.45	35.75	14.42	76.85	1.97585e+07	2.35067e+07	2.42287e+07	7.54809e+06	1.15874e+07	9.23664e+06	9.18219e+06	1.95142e+07	1.78479e+07
n/a	High	Master Protein	O43684	Mitotic checkpoint protein BUB3 [OS=Homo sapiens]		0	21	6	40	6	328	37.1	6.84	38.08	cell division;cell organization and biogenesis;metabolic process;regulation of biological process	chromosome;cytosol;nucleus	protein binding	Pf00400, Pf04762	9184	ENSG00000154473.17	BUB3	10	Cell Cycle	Cell cycle; HTLV-I infection	Inactivation of APC/C via direct inhibition of the APC/C complex; Amplification of signal from unattached kinetochores via a MAD2 inhibitory signal; Separation of Sister Chromatids; Resolution of Sister Chromatid Cohesion; RHO GTPases Activate Formins; Cdc20:Phospho-APC/C mediated degradation of Cyclin A; APC-Cdc20 mediated degradation of Nek2A	29	4.125	100	100	100	2.4997e+07	7.83183e+06	2.38082e+07	17975.3	4357.68	23.03	35	30.61			1.70945e+07	2.72146e+07	2.4997e+07	6.48247e+06	1.24336e+07	7.83183e+06	1.3756e+07	2.38082e+07	2.58394e+07
n/a	High	Master Protein	O75534	cold shock domain-containing protein E1 [OS=Homo sapiens]		0	16	11	58	11	798	88.8	6.25	34.76	metabolic process;regulation of biological process	cytoplasm;cytosol;Golgi;membrane	DNA binding;protein binding;RNA binding	Pf00313, Pf12901	7812	ENSG00000009307.15	CSDE1	1				0	1.271	100	100	59.062	6.75501e+07	1.36358e+07	3.99706e+07	293419	230872	1.5	37.19	9.91	9	38.06	6.79107e+07	6.60098e+07	6.75501e+07	1.36358e+07	2.4071e+07	1.28417e+07	3.68885e+07	4.48598e+07	3.99706e+07
n/a	High	Master Protein	P00738	Haptoglobin [OS=Homo sapiens]		0	12	5	27	5	406	45.2	6.58	20.17	defense response;metabolic process;regulation of biological process;response to stimulus;transport	extracellular;organelle lumen	antioxidant activity;catalytic activity;protein binding	Pf00089	3240	ENSG00000257017.8	HP	16			Neutrophil degranulation; Scavenging of heme from plasma	6	12.203	14.932	20.796	18.429	955499	1.17934e+06	1.33075e+06	780920	63991.9	48.43	50.53	39.07	8.31	56.7		668710	1.36528e+06	1.94288e+06	673080	1.17934e+06	1.33075e+06	1.67324e+06	716924
n/a	High	Master Protein	P84090	Enhancer of rudimentary homolog [OS=Homo sapiens]		0	25	3	43	3	104	12.3	5.92	17.36	metabolic process;regulation of biological process		DNA binding;nucleotide binding;protein binding;RNA binding	Pf01133	2079	ENSG00000100632.10	ERH	14				0	70.963	100	100	100	1.25401e+08	2.11129e+07	1.4338e+08	458724	6464.24	22.18	32.46	32.67	26.44		8.33809e+07	1.27395e+08	1.25401e+08	1.65578e+07	3.1105e+07	2.11129e+07	7.54731e+07	1.44714e+08	1.4338e+08
n/a	High	Master Protein	O15427	Monocarboxylate transporter 4 [OS=Homo sapiens]		0.001	8	3	18	3	465	49.4	7.96	9.27	cellular component movement;metabolic process;transport	membrane	protein binding;RNA binding;transporter activity	Pf07690	9123	ENSG00000141526.16	SLC16A3	17		Central carbon metabolism in cancer	Proton-coupled monocarboxylate transport; Basigin interactions; Pyruvate metabolism	12	100	100	100	100	1.65037e+06	1.39243e+06	1.93815e+06	801391	7459.54	29.27	50.33	34.11	22.46	80.19	1.20858e+06	2.19274e+06	1.65037e+06	631545	1.9661e+06	1.39243e+06	1.93815e+06	3.33846e+06	1.90918e+06
[truncated: 1,818 more rows]
[truncated: 25 more columns]
