# Supplementary material for: ALCAM: A Novel Surface Marker on EpCAMlow Circulating Tumor Cells
Source: Biomedicines. 2022 Aug 16;10(8):1983. doi: 10.3390/biomedicines10081983 (PMC9405826; doi:10.3390/biomedicines10081983)
Supplement: Supplementary file 1 [file biomedicines-10-01983-s001.zip › Supplementary File S4.xlsx]

## Sheet: AdherantVsLowAttachment
Protein FDR Confidence: A5 PMI-Byonic	Protein FDR Confidence: Sequest HT	Master	Accession	Description	Exp. q-value: A5 PMI-Byonic	Exp. q-value: Sequest HT	Coverage [%]	# Peptides	# PSMs	# Unique Peptides	# AAs	MW [kDa]	calc. pI	Score Sequest HT: Sequest HT	Biological Process	Cellular Component	Molecular Function	Pfam IDs	Entrez Gene ID	Ensembl Gene ID	Gene Symbol	Chromosome	WikiPathways	KEGG Pathways	Reactome Pathways	# Protein Pathway Groups	|Log Prob| (by Search Engine): PMI-Byonic A5	FDR (by Search Engine): PMI-Byonic A5	Modifications	Abundances (Normalized): F1: Sample, CM61-adherent, A1	Abundances (Normalized): F2: Sample, CM61-adherent, A2	Abundances (Normalized): F3: Sample, CM61-adherent, A3	Avg CM61-adherent	SD	Abundances (Normalized): F7: Sample, CM61-low-attachment, C1	Abundances (Normalized): F8: Sample, CM61-low-attachment, C2	Abundances (Normalized): F9: Sample, CM61-low-attachment, C3	Avg CM61-low-attachment	SD	Avg CM61-adherent	Avg CM61-low-attachment	LA/Adh	Log2FC
n/a	Medium	Master Protein	P12273	Prolactin-inducible protein [OS=Homo sapiens]		0.021	8	1	2	1	146	16.6	8.05	1.66	metabolic process;regulation of biological process;response to stimulus;transport	extracellular;membrane;nucleus	catalytic activity;protein binding	Pf05326	5304	ENSG00000159763.3	PIP	7			Miscellaneous transport and binding events	2	2.61	0.00482759					0	0	16448.8			16448.8	0	1	9.42492e+06	9.42492e+06	23.168
n/a	High	Master Protein	Q07021	Complement component 1 Q subcomponent-binding protein, mitochondrial [OS=Homo sapiens]		0.007	4	1	1	1	282	31.3	4.84	2.59	cell death;cell organization and biogenesis;defense response;metabolic process;regulation of biological process;response to stimulus	cell surface;cytoplasm;cytosol;extracellular;membrane;mitochondrion;nucleus;organelle lumen	protein binding;RNA binding	Pf02330	708	ENSG00000108561.8	C1QBP	17	Mesodermal Commitment Pathway	Herpes simplex infection	Intrinsic Pathway of Fibrin Clot Formation	5		0					0	0	23135.5			23135.5	0	1	8.46257e+06	8.46257e+06	23.0127
n/a	High	Master Protein	P08637	Low affinity immunoglobulin gamma Fc region receptor III-A [OS=Homo sapiens]		0.001	7	2	15	2	254	29.1	8.07	13.89	regulation of biological process;response to stimulus	extracellular;membrane	protein binding	Pf07679, Pf13895, Pf13927	2214	ENSG00000203747.10	FCGR3A	1		Staphylococcus aureus infection; Leishmaniasis; Phagosome; Natural killer cell mediated cytotoxicity; Osteoclast differentiation; Fc gamma R-mediated phagocytosis; Systemic lupus erythematosus; Tuberculosis	FCGR activation; Regulation of actin dynamics for phagocytic cup formation; Immunoregulatory interactions between a Lymphoid and a non-Lymphoid cell; Role of phospholipids in phagocytosis	16	9.28	0.00127226					0	0		69219.1		69219.1	0	1	7.19343e+06	7.19343e+06	22.7782
n/a	High	Master Protein	P62987	Ubiquitin-60S ribosomal protein L40 [OS=Homo sapiens]		0	52	7	57	1	128	14.7	9.83	101.05	cell communication;cell organization and biogenesis;cellular homeostasis;defense response;metabolic process;regulation of biological process;response to stimulus;transport	cytoplasm;cytosol;endoplasmic reticulum;membrane;nucleus;ribosome	protein binding;structural molecule activity	Pf00240, Pf01020, Pf11976, Pf13019, Pf13881, Pf14560	7311	ENSG00000221983.7	UBA52	19	DNA Replication; Cytoplasmic Ribosomal Proteins	Ribosome	NOTCH1 Intracellular Domain Regulates Transcription; Activated NOTCH1 Transmits Signal to the Nucleus; Regulation of RAS by GAPs; Viral mRNA Translation; UCH proteinases; ISG15 antiviral mechanism; Regulation of PLK1 Activity at G2/M Transition; Constitutive Signaling by NOTCH1 HD+PEST Domain Mutants; Activated TLR4 signalling; Hh mutants that don't undergo autocatalytic processing are degraded b…	361	3.42	0.000759878					0	0	228661			228661	0	1	6.88965e+06	6.88965e+06	22.716
n/a	High	Master Protein	Q5QGZ9-4	Isoform 4 of C-type lectin domain family 12 member A [OS=Homo sapiens]		0.001	15	3	11	3	232	27.3	8.54	9.42	transport	membrane		Pf00059	160364	ENSG00000172322.13	CLEC12A	12				0	11.19	0.00146628					0	0	244181			244181	0	1	6.27912e+06	6.27912e+06	22.5821
n/a	High	Master Protein	Q9P2F8-1	Signal-induced proliferation-associated 1-like protein 2 [OS=Homo sapiens]		0.005	1	2	3	1	1722	190.3	6.77	4.76	regulation of biological process		enzyme regulator activity;protein binding	Pf00595, Pf02145, Pf11881	57568	ENSG00000116991.10	SIPA1L2	1		Rap1 signaling pathway		1		0					0	0	257377	519580	449900	408952	110891	1	5.40574e+06	5.40574e+06	22.3661
n/a	High	Master Protein	P13688-1	Carcinoembryonic antigen-related cell adhesion molecule 1 [OS=Homo sapiens]		0.001	8	3	13	2	526	57.5	5.97	15.04	cell proliferation;cellular component movement;metabolic process;regulation of biological process;response to stimulus;transport	cell surface;extracellular;membrane	protein binding;transporter activity	Pf00047, Pf07679, Pf07686, Pf13895, Pf13927	634	ENSG00000079385.21	CEACAM1	19			Neutrophil degranulation; Fibronectin matrix formation; Cell surface interactions at the vascular wall	7	11.82	0					0	0	466753	531122		498937	32184.1	1	4.24723e+06	4.24723e+06	22.0181
n/a	High	Master Protein	Q9UK76-2	Isoform 2 of Jupiter microtubule associated homolog 1 [OS=Homo sapiens]		0.007	14	1	3	1	181	19.9	8.32	3.81		cytoplasm;membrane;nucleus			51155	ENSG00000189159.15	HN1; JPT1	17				0	6.13	0.000988142					0	0		638530		638530	0	1	4.15727e+06	4.15727e+06	21.9872
n/a	High	Master Protein	Q7Z5R6	Amyloid beta A4 precursor protein-binding family B member 1-interacting protein [OS=Homo sapiens]		0.009	3	2	3	2	666	73.1	5.59	2.01	regulation of biological process;response to stimulus	cytoplasm;cytoskeleton;cytosol;membrane	protein binding	Pf00169, Pf00788	54518	ENSG00000077420.15	APBB1IP	10	TYROBP Causal Network	Rap1 signaling pathway; Platelet activation	p130Cas linkage to MAPK signaling for integrins; Paradoxical activation of RAF signaling by kinase inactive BRAF; Signaling by BRAF and RAF fusions; MAP2K and MAPK activation; GRB2:SOS provides linkage to MAPK signaling for Integrins ; Signaling by RAS mutants; Signaling by high-kinase activity BRAF mutants; Interleukin-20 family signaling; Signaling by moderate kinase activity BRAF mutants	27	3.78	0.000787402					0	0			661607	661607	0	1	3.62919e+06	3.62919e+06	21.7912
n/a	High	Master Protein	Q8WWI5	choline transporter-like protein 1 [OS=Homo sapiens]		0.001	3	2	10	2	657	73.3	8.6	7.12	metabolic process;transport	membrane;mitochondrion	transporter activity	Pf04515	23446	ENSG00000070214.15	SLC44A1	9		Choline metabolism in cancer	Synthesis of PC; Choline catabolism; Transport of bile salts and organic acids, metal ions and amine compounds	11	3.94	0.0008					0	0	774313			774313	0	1	3.26758e+06	3.26758e+06	21.6398
n/a	High	Master Protein	P36952-1	Serpin B5 [OS=Homo sapiens]		0.009	3	1	2	1	375	42.1	6.05	1.93	cell organization and biogenesis;cellular component movement;regulation of biological process	cytoplasm;extracellular	enzyme regulator activity;protein binding	Pf00079	5268	ENSG00000206075.13	SERPINB5	18		MicroRNAs in cancer; p53 signaling pathway		2	3.27	0.000747943					0	0	850484			850484	0	1	3.25181e+06	3.25181e+06	21.6328
n/a	High	Master Protein	Q9H4E7	differentially expressed in FDCP 6 homolog [OS=Homo sapiens]		0.007	3	2	5	2	631	73.9	6.05	3.45		cytoplasm;cytoskeleton;cytosol;membrane;nucleus	protein binding	Pf00169, Pf08458, Pf10211, Pf14593	50619	ENSG00000023892.10	DEF6	6				0	7.2	0.00107759					0	0		852077		852077	0	1	2.93604e+06	2.93604e+06	21.4854
n/a	High	Master Protein	Q9ULZ3	apoptosis-associated speck-like protein containing a CARD [OS=Homo sapiens]		0.006	6	1	2	1	195	21.6	6.34	4.2	cell death;cell organization and biogenesis;defense response;metabolic process;regulation of biological process;response to stimulus;transport	cytoplasm;cytosol;endoplasmic reticulum;extracellular;mitochondrion;nucleus;organelle lumen	catalytic activity;enzyme regulator activity;protein binding	Pf00619, Pf02758	29108	ENSG00000103490.13	PYCARD	16	Nucleotide-binding Oligomerization Domain (NOD) pathway; TYROBP Causal Network	Salmonella infection; Pertussis; Influenza A; Cytosolic DNA-sensing pathway; NOD-like receptor signaling pathway; Legionellosis	CLEC7A/inflammasome pathway; The NLRP3 inflammasome; The AIM2 inflammasome; Neutrophil degranulation	18		0					0	0			859198	859198	0	1	2.79555e+06	2.79555e+06	21.4147
n/a	Medium	Master Protein	Q96DZ1	Endoplasmic reticulum lectin 1 [OS=Homo sapiens]		0.021	2	1	1	1	483	54.8	6.28	0	metabolic process;transport	endoplasmic reticulum;organelle lumen	protein binding	Pf07915, Pf13015	27248	ENSG00000068912.13	ERLEC1	2		Protein processing in endoplasmic reticulum	Hh mutants that don't undergo autocatalytic processing are degraded by ERAD; ABC-family proteins mediated transport; Defective CFTR causes cystic fibrosis; Hedgehog ligand biogenesis	13		0					0	0	765279	1.03525e+06		900265	134987	1	2.752e+06	2.752e+06	21.3921
n/a	High	Master Protein	Q9UGN4-1	CMRF35-like molecule 8 [OS=Homo sapiens]		0.007	8	2	10	2	299	33.2	5.49	2.57	regulation of biological process;response to stimulus;transport	membrane	protein binding;receptor activity;signal transducer activity	Pf07686	11314	ENSG00000167851.13	CD300A	17			Neutrophil degranulation; Immunoregulatory interactions between a Lymphoid and a non-Lymphoid cell	5	8.61	0.00120482					0	0	757914	1.04276e+06		900338	142424	1	2.61256e+06	2.61256e+06	21.317
n/a	High	Master Protein	Q07960	rho GTPase-activating protein 1 [OS=Homo sapiens]		0.001	3	1	9	1	439	50.4	6.29	14.14	regulation of biological process;response to stimulus;transport	cytoplasm;cytosol;endosome;membrane	enzyme regulator activity;protein binding	Pf00620, Pf00650, Pf13716	392	ENSG00000175220.11	ARHGAP1	11			Rho GTPase cycle	3	6.43	0.00101112					0	0	810335	1.03106e+06		920698	110363	1	2.3732e+06	2.3732e+06	21.1784
n/a	High	Master Protein	P25445-1	Tumor necrosis factor receptor superfamily member 6 [OS=Homo sapiens]		0.009	3	1	1	1	335	37.7	7.94	2.2	cell communication;cell death;cell organization and biogenesis;defense response;development;metabolic process;regulation of biological process;response to stimulus	cell surface;cytosol;extracellular;membrane;mitochondrion	protein binding;receptor activity;signal transducer activity	Pf00020, Pf00531	355	ENSG00000026103.21	FAS	10	miRNA Regulation of DNA Damage Response; Alzheimers Disease; Allograft Rejection; Adipogenesis; Nanomaterial induced apoptosis; Apoptosis; Fas Ligand (FasL) pathway and Stress induction of Heat Shock Proteins (HSP) regulation; MAPK Signaling Pathway; Apoptosis Modulation by HSP70; VEGFA-VEGFR2 Signaling Pathway; T-Cell antigen Receptor (TCR) Signaling Pathway; DNA Damage Response	Proteoglycans in cancer; MAPK signaling pathway; TNF signaling pathway; Graft-versus-host disease; p53 signaling pathway; Pathways in cancer; Cytokine-cytokine receptor interaction; Platinum drug resistance; Measles; Autoimmune thyroid disease; Hepatitis B; Influenza A; Apoptosis; Chagas disease (American trypanosomiasis); Herpes simplex infection; Natural killer cell mediated cytotoxicity; Non-a…	Dimerization of procaspase-8; FasL/ CD95L signaling; TP53 Regulates Transcription of Death Receptors and Ligands; Regulation by c-FLIP; CASP8 activity is inhibited	52		0					0	0	523236	1.10473e+06	1.27394e+06	967301	321510	1	2.23955e+06	2.23955e+06	21.0948
n/a	High	Master Protein	P22732-1	Solute carrier family 2, facilitated glucose transporter member 5 [OS=Homo sapiens]		0.001	2	1	4	1	501	54.9	6.04	7.54	metabolic process;response to stimulus;transport	membrane	transporter activity	Pf00083, Pf06609, Pf07690	6518	ENSG00000142583.17	SLC2A5	1	NRF2 pathway; Glycolysis and Gluconeogenesis	Carbohydrate digestion and absorption	Neutrophil degranulation; Intestinal hexose absorption	9		0					0	0	802174		1.13612e+06	969149	166975	1	2.14126e+06	2.14126e+06	21.03
n/a	High	Master Protein	P15529-2	Isoform B of Membrane cofactor protein [OS=Homo sapiens]		0	8	3	26	3	399	44.2	6.9	22.67	defense response;metabolic process;regulation of biological process;response to stimulus	cell surface;Golgi;membrane	catalytic activity;enzyme regulator activity;protein binding;receptor activity	Pf00084	4179	ENSG00000117335.19	CD46	1	Complement and Coagulation Cascades			1	8.93	0.00123305					0	0		1.04546e+06		1.04546e+06	0	1	1.98563e+06	1.98563e+06	20.9212
n/a	Medium	Master Protein	P49748-1	Very long-chain specific acyl-CoA dehydrogenase, mitochondrial [OS=Homo sapiens]		0.019	3	2	2	2	655	70.3	8.75	0	cell differentiation;metabolic process;regulation of biological process;response to stimulus	cytosol;membrane;mitochondrion;nucleus;organelle lumen	catalytic activity;nucleotide binding	Pf00441, Pf02770, Pf02771, Pf08028	37	ENSG00000072778.19	ACADVL	17	Fatty Acid Beta Oxidation; Mitochondrial LC-Fatty Acid Beta-Oxidation	Fatty acid metabolism; Fatty acid degradation; Metabolic pathways	Beta oxidation of palmitoyl-CoA to myristoyl-CoA; XBP1(S) activates chaperone genes	15	1.98	0.00886076					0	0		996816	1.09923e+06	1.04803e+06	51209.1	1	1.92287e+06	1.92287e+06	20.8748
n/a	Medium	Master Protein	Q9BRK5-1	45 kDa calcium-binding protein [OS=Homo sapiens]		0.022	2	1	1	1	362	41.8	4.86	0	cell differentiation;response to stimulus;transport	cytoplasm;endosome;Golgi;membrane;organelle lumen	metal ion binding;protein binding	Pf13499	51150	ENSG00000078808.16	SDF4	1				0		0					0	0	804175	1.55087e+06	1.23133e+06	1.19546e+06	305891	1	1.90657e+06	1.90657e+06	20.8625
n/a	Medium	Master Protein	Q9H1X3	dnaJ homolog subfamily C member 25 [OS=Homo sapiens]		0.021	3	1	1	1	360	42.4	9.13	0		membrane		Pf00226	548645; 552891	ENSG00000059769.19	DNAJC25; DNAJC25-GNG10	9				0		0					0	0		1.348e+06	1.1833e+06	1.26565e+06	82349	1	1.83361e+06	1.83361e+06	20.8063
n/a	High	Master Protein	O94844	Rho-related BTB domain-containing protein 1 [OS=Homo sapiens]		0.003	2	1	3	1	696	79.4	6.87	5.39	regulation of biological process;response to stimulus	cytosol;membrane	catalytic activity;nucleotide binding;protein binding	Pf00071, Pf00651, Pf08477	9886	ENSG00000072422.16	RHOBTB1	10		Ubiquitin mediated proteolysis	Rho GTPase cycle	4		0					0	0	670965	2.02871e+06		1.34984e+06	678875	1	1.82997e+06	1.82997e+06	20.8034
n/a	High	Master Protein	P00167-1	Cytochrome b5 [OS=Homo sapiens]		0.001	33	3	6	3	134	15.3	4.96	7.19	metabolic process;response to stimulus;transport	cytoplasm;cytosol;endoplasmic reticulum;membrane;mitochondrion	catalytic activity;metal ion binding;protein binding;transporter activity	Pf00173	1528	ENSG00000166347.18	CYB5A	18	Oxidation by Cytochrome P450		Vitamin C (ascorbate) metabolism	5	15.36	0					0	0	1.27019e+06	1.38633e+06	1.63373e+06	1.43008e+06	151605	1	1.73384e+06	1.73384e+06	20.7255
n/a	Medium	Master Protein	P14207	folate receptor beta [OS=Homo sapiens]		0.023	5	1	3	1	255	29.3	7.53	0	cell communication;cellular component movement;defense response;metabolic process;regulation of biological process;response to stimulus;transport	cell surface;extracellular;membrane	transporter activity	Pf03024	2350	ENSG00000165457.13	FOLR2	11	Folate Metabolism	Endocytosis; Antifolate resistance	Metabolism of folate and pterines; Post-translational modification: synthesis of GPI-anchored proteins	10		0					0	0	1.2071e+06	1.48861e+06	1.74671e+06	1.48081e+06	220365	1	1.66766e+06	1.66766e+06	20.6694
n/a	Medium	Master Protein	P61803	Dolichyl-diphosphooligosaccharide--protein glycosyltransferase subunit DAD1 [OS=Homo sapiens]		0.023	11	1	2	1	113	12.5	7.08	0	cell death;metabolic process;regulation of biological process;response to stimulus	endoplasmic reticulum;membrane	catalytic activity	Pf02109	1603	ENSG00000129562.10	DAD1	14		N-Glycan biosynthesis; Metabolic pathways; Protein processing in endoplasmic reticulum	Asparagine N-linked glycosylation	6		0					0	0	689867	1.7621e+06	2.08769e+06	1.51322e+06	597177	1	1.5625e+06	1.5625e+06	20.5754
n/a	Medium	Master Protein	Q16698	2,4-dienoyl-CoA reductase, mitochondrial [OS=Homo sapiens]		0.017	4	1	3	1	335	36	9.28	1.73	cell organization and biogenesis;metabolic process	cytosol;mitochondrion;nucleus;organelle lumen	catalytic activity;nucleotide binding	Pf00106, Pf08659, Pf13561	1666	ENSG00000104325.6	DECR1	8	Fatty Acid Beta Oxidation; Fatty Acid Biosynthesis		mitochondrial fatty acid beta-oxidation of unsaturated fatty acids	7	3.51	0.000768049					0	0	1.36608e+06	1.43606e+06	1.88537e+06	1.5625e+06	230080	1	1.51322e+06	1.51322e+06	20.5292
n/a	Medium	Master Protein	P59768	Guanine nucleotide-binding protein G(I)/G(S)/G(O) subunit gamma-2 [OS=Homo sapiens]		0.022	32	2	2	2	71	7.8	7.99	0	cell proliferation;metabolic process;regulation of biological process;response to stimulus	membrane	protein binding;signal transducer activity	Pf00631	54331	ENSG00000186469.8	GNG2	14	Nicotine Activity on Dopaminergic Neurons; Human Thyroid Stimulating Hormone (TSH) signaling pathway; Myometrial Relaxation and Contraction Pathways; Chemokine signaling pathway; Focal Adhesion-PI3K-Akt-mTOR-signaling pathway; Calcium Regulation in the Cardiac Cell	Pathways in cancer; Serotonergic synapse; PI3K-Akt signaling pathway; Alcoholism; Circadian entrainment; Chemokine signaling pathway; Retrograde endocannabinoid signaling; Morphine addiction; Cholinergic synapse; Glutamatergic synapse; Ras signaling pathway; Dopaminergic synapse; GABAergic synapse	G alpha (z) signalling events; Activation of G protein gated Potassium channels; Cooperation of PDCL (PhLP1) and TRiC/CCT in G-protein beta folding; Glucagon-type ligand receptors; Thromboxane signalling through TP receptor; ADP signalling through P2Y purinoceptor 1; G beta:gamma signalling through PI3Kgamma; Vasopressin regulates renal water homeostasis via Aquaporins; G-protein activation; Inhi…	74	6.27	0.001001					0	0		1.66766e+06		1.66766e+06	0	1	1.48081e+06	1.48081e+06	20.498
n/a	Medium	Master Protein	O60911	Cathepsin L2 [OS=Homo sapiens]		0.016	4	2	2	2	334	37.3	8.76	1.77	cell communication;cell death;cell differentiation;cell organization and biogenesis;metabolic process;regulation of biological process;response to stimulus	cytoplasm;extracellular;organelle lumen;vacuole	catalytic activity;protein binding	Pf00112, Pf08246	1515	ENSG00000136943.10	CTSL2; CTSV	9	Endochondral Ossification	Apoptosis; Lysosome	RUNX1 regulates transcription of genes involved in differentiation of keratinocytes; Assembly of collagen fibrils and other multimeric structures; Endosomal/Vacuolar pathway; Activation of Matrix Metalloproteinases; MHC class II antigen presentation; Trafficking and processing of endosomal TLR	22		0					0	0			1.73384e+06	1.73384e+06	0	1	1.43008e+06	1.43008e+06	20.4477
n/a	High	Master Protein	Q03518	Antigen peptide transporter 1 [OS=Homo sapiens]		0.006	1	1	2	1	808	87.2	8.02	4.15	defense response;response to stimulus;transport	endoplasmic reticulum;membrane;mitochondrion	catalytic activity;nucleotide binding;protein binding;transporter activity	Pf00005, Pf00664, Pf13304, Pf13476	6890	ENSG00000232367.5; ENSG00000227816.4; ENSG00000226173.4; ENSG00000230705.4; ENSG00000168394.10; ENSG00000206297.7; ENSG00000224212.4	TAP1	6; CHR_HSCHR6_MHC_COX_CTG1; CHR_HSCHR6_MHC_APD_CTG1; CHR_HSCHR6_MHC_MANN_CTG1; CHR_HSCHR6_MHC_MCF_CTG1; CHR_HSCHR6_MHC_QBL_CTG1; CHR_HSCHR6_MHC_DBB_CTG1	Mecp2 and Associated Rett Syndrome; Type II interferon signaling (IFNG)	Herpes simplex infection; Antigen processing and presentation; Phagosome; ABC transporters; Primary immunodeficiency	ER-Phagosome pathway; Antigen Presentation: Folding, assembly and peptide loading of class I MHC	13		0					0	0		1.82997e+06		1.82997e+06	0	1	1.34984e+06	1.34984e+06	20.3644
n/a	Medium	Master Protein	O15230	Laminin subunit alpha-5 [OS=Homo sapiens]		0.023	0	1	3	1	3695	399.5	7.02	0	cell differentiation;cell organization and biogenesis;cell proliferation;cellular component movement;regulation of biological process;response to stimulus;transport	extracellular;membrane;nucleus	catalytic activity;motor activity;protein binding;structural molecule activity	Pf00052, Pf00053, Pf00054, Pf00055, Pf00529, Pf01576, Pf02210, Pf06008, Pf06009, Pf12795, Pf13514, Pf13747	3911	ENSG00000130702.15	LAMA5	20	Alpha 6 Beta 4 signaling pathway; Primary Focal Segmental Glomerulosclerosis FSGS; Focal Adhesion; Focal Adhesion-PI3K-Akt-mTOR-signaling pathway; Inflammatory Response Pathway	Focal adhesion; Metabolic pathways; Pathways in cancer; Small cell lung cancer; Toxoplasmosis; Amoebiasis; PI3K-Akt signaling pathway; ECM-receptor interaction	ECM proteoglycans; Laminin interactions; Degradation of the extracellular matrix; MET activates PTK2 signaling; Interleukin-4 and 13 signaling; Non-integrin membrane-ECM interactions	27		0					0	0	1.17714e+06	1.89873e+06	2.42495e+06	1.83361e+06	511495	1	1.26565e+06	1.26565e+06	20.2715
n/a	Medium	Master Protein	P17302	Gap junction alpha-1 protein [OS=Homo sapiens]		0.024	2	1	3	1	382	43	8.76	0	cell communication;cell death;cell organization and biogenesis;cellular homeostasis;defense response;regulation of biological process;response to stimulus;transport	cytoplasm;endoplasmic reticulum;endosome;Golgi;membrane;mitochondrion;vacuole	protein binding;signal transducer activity;transporter activity	Pf00029, Pf03508, Pf10582	2697	ENSG00000152661.7	GJA1	6	TarBasePathway; Arrhythmogenic Right Ventricular Cardiomyopathy; Corticotropin-releasing hormone signaling pathway; Spinal Cord Injury; Myometrial Relaxation and Contraction Pathways; Wnt Signaling Pathway Netpath; VEGFA-VEGFR2 Signaling Pathway; EGF/EGFR Signaling Pathway; Calcium Regulation in the Cardiac Cell; Sudden Infant Death Syndrome (SIDS) Susceptibility Pathways	Arrhythmogenic right ventricular cardiomyopathy (ARVC); Gap junction	Transport of connexins along the secretory pathway; c-src mediated regulation of Cx43 function and closure of gap junctions; Formation of annular gap junctions; Microtubule-dependent trafficking of connexons from Golgi to the plasma membrane; Oligomerization of connexins into connexons	25		0					0	0	2.82039e+06	1.38045e+06	1.51887e+06	1.90657e+06	648636	1	1.19546e+06	1.19546e+06	20.1891
n/a	Medium	Master Protein	Q12860	Contactin-1 [OS=Homo sapiens]		0.019	1	1	1	1	1018	113.2	5.9	1.67	cell organization and biogenesis;regulation of biological process;response to stimulus	membrane	protein binding	Pf00041, Pf00047, Pf07679, Pf07686, Pf13895, Pf13927	1272	ENSG00000018236.14	CNTN1	12		Cell adhesion molecules (CAMs)	Activated NOTCH1 Transmits Signal to the Nucleus; NOTCH2 Activation and Transmission of Signal to the Nucleus; Neurofascin interactions	11		0					0	0	1.19726e+06	2.13739e+06	2.43398e+06	1.92287e+06	527184	1	1.04803e+06	1.04803e+06	19.9992
n/a	Medium	Master Protein	O75787	Renin receptor [OS=Homo sapiens]		0.02	2	1	1	1	350	39	6.1	0	cellular component movement;metabolic process;regulation of biological process;response to stimulus;transport	membrane	protein binding;receptor activity;transporter activity	Pf07850	10159	ENSG00000182220.14	ATP6AP2	X	ACE Inhibitor Pathway; Oxidative phosphorylation	Renin-angiotensin system	Metabolism of Angiotensinogen to Angiotensins; Neutrophil degranulation	9		0					0	0		2.1391e+06	1.83216e+06	1.98563e+06	153470	1	1.04546e+06	1.04546e+06	19.9957
n/a	High	Master Protein	Q13332	Receptor-type tyrosine-protein phosphatase S [OS=Homo sapiens]		0.007	1	1	1	1	1948	216.9	6.46	2.48	metabolic process;regulation of biological process	membrane	catalytic activity;protein binding	Pf00041, Pf00047, Pf00102, Pf07679, Pf09294, Pf13895, Pf13927, Pf14566	5802	ENSG00000105426.16	PTPRS	19			ECM proteoglycans; Receptor-type tyrosine-protein phosphatases; Synaptic adhesion-like molecules	6		0					0	0		2.14126e+06		2.14126e+06	0	1	969149	969149	19.8864
n/a	Medium	Master Protein	P19971	thymidine phosphorylase [OS=Homo sapiens]		0.015	4	2	2	2	482	49.9	5.53	1.78	cell differentiation;cell organization and biogenesis;cellular homeostasis;development;metabolic process;regulation of biological process;response to stimulus;transport	cytosol;membrane;mitochondrion;organelle lumen	catalytic activity;metal ion binding;protein binding	Pf00591, Pf02885, Pf07831	1890; 9997	ENSG00000025708.13	TYMP; SCO2	22	Fluoropyrimidine Activity; Bladder Cancer	Pyrimidine metabolism; Metabolic pathways; Drug metabolism - other enzymes; Bladder cancer	Pyrimidine salvage; Pyrimidine catabolism	12		0					0	0			2.23955e+06	2.23955e+06	0	1	967301	967301	19.8836
n/a	Medium	Master Protein	Q9Y3M8-1	StAR-related lipid transfer protein 13 [OS=Homo sapiens]		0.021	1	1	1	1	1113	124.9	7.02	0	cellular component movement;regulation of biological process;response to stimulus	cytoplasm;cytosol;membrane;mitochondrion	enzyme regulator activity;protein binding	Pf00620, Pf01852, Pf07647	90627	ENSG00000133121.20	STARD13	13			Rho GTPase cycle	3		0					0	0		2.46707e+06	2.27934e+06	2.3732e+06	93863.5	1	920698	920698	19.8124
n/a	Medium	Master Protein	Q6PCB7	long-chain fatty acid transport protein 1 [OS=Homo sapiens]		0.021	1	1	1	1	646	71.1	8.53	0	metabolic process;regulation of biological process;response to stimulus;transport	cytoplasm;endoplasmic reticulum;membrane	catalytic activity;nucleotide binding;protein binding;transporter activity	Pf00501, Pf13193	376497	ENSG00000130304.16	SLC27A1	19	PPAR Alpha Pathway; PPAR signaling pathway	Insulin resistance; PPAR signaling pathway	Transport of fatty acids; PPARA activates gene expression	12		0					0	0	2.25197e+06	2.97314e+06		2.61256e+06	360580	1	900338	900338	19.7801
n/a	High	Master Protein	P11717	Cation-independent mannose-6-phosphate receptor [OS=Homo sapiens]		0.002	0	1	3	1	2491	274.2	5.94	6.48	cell organization and biogenesis;regulation of biological process;response to stimulus;transport	cell surface;cytoplasm;endosome;Golgi;membrane;nucleus;vacuole	catalytic activity;protein binding;receptor activity;signal transducer activity;transporter activity	Pf00040, Pf00878, Pf02157, Pf09451	3482	ENSG00000197081.12	IGF2R	6		Lysosome; Endocytosis	Cargo recognition for clathrin-mediated endocytosis; Retrograde transport at the Trans-Golgi-Network; Neutrophil degranulation; Golgi Associated Vesicle Biogenesis	14		0					0	0	1.81006e+06	3.15753e+06	3.28842e+06	2.752e+06	668193	1	900265	900265	19.78
n/a	Medium	Master Protein	P23142	Fibulin-1 [OS=Homo sapiens]		0.023	1	1	2	1	703	77.2	5.22	0	cell organization and biogenesis;metabolic process;regulation of biological process;response to stimulus	extracellular	enzyme regulator activity;metal ion binding;protein binding;structural molecule activity	Pf01821, Pf07645, Pf12662, Pf14670	2192	ENSG00000077942.18	FBLN1	22			Molecules associated with elastic fibres	3		0					0	0	2.45041e+06	2.59156e+06	3.34468e+06	2.79555e+06	392549	1	859198	859198	19.7126
n/a	Medium	Master Protein	Q14129	protein DGCR6 [OS=Homo sapiens]		0.02	5	1	1	1	220	25	7.5	0		nucleus		Pf07324	8214; 102724770	ENSG00000183628.12; ENSG00000278817.1	DGCR6; LOC102724770	22				0		0					0	0	2.93604e+06			2.93604e+06	0	1	852077	852077	19.7006
n/a	High	Master Protein	Q16787-2	Laminin subunit alpha-3 [OS=Homo sapiens]		0.007	0	1	2	1	3333	366.4	7.24	3.48	cell differentiation;cell organization and biogenesis;cellular component movement;regulation of biological process;transport	extracellular	catalytic activity;motor activity;protein binding;structural molecule activity	Pf00038, Pf00052, Pf00053, Pf00054, Pf00055, Pf01576, Pf02210, Pf03938, Pf05557, Pf06008, Pf06009, Pf06873, Pf07888, Pf07926, Pf10174, Pf11985, Pf12795, Pf13385, Pf13851	3909		LAMA3	18	Alpha 6 Beta 4 signaling pathway; Focal Adhesion; Overview of nanoparticle effects; Focal Adhesion-PI3K-Akt-mTOR-signaling pathway	ECM-receptor interaction; Pathways in cancer; Metabolic pathways; Toxoplasmosis; PI3K-Akt signaling pathway; Focal adhesion; Small cell lung cancer; Amoebiasis	ECM proteoglycans; Laminin interactions; Degradation of the extracellular matrix; MET activates PTK2 signaling; Type I hemidesmosome assembly; Anchoring fibril formation; Non-integrin membrane-ECM interactions	28		0					0	0	2.55555e+06	3.70311e+06	3.49676e+06	3.25181e+06	499482	1	850484	850484	19.6979
n/a	High	Master Protein	A6NGE4	DDB1- and CUL4-associated factor 8-like protein 1 [OS=Homo sapiens]		0.009	2	1	1	1	600	67.3	4.87	2.02			protein binding	Pf00400	139425	ENSG00000226372.3	DCAF8L1	X				0		0					0	0	2.96513e+06	3.84442e+06	2.9932e+06	3.26758e+06	408046	1	774313	774313	19.5626
n/a	Medium	Master Protein	P17677-1	Neuromodulin [OS=Homo sapiens]		0.011	5	1	1	1	238	24.8	4.72	1.8	cell differentiation;cell organization and biogenesis;cellular component movement;development;regulation of biological process;response to stimulus	cytoplasm;membrane	protein binding	Pf00612, Pf10580	2596	ENSG00000172020.12	GAP43	3	Glial Cell Differentiation; Spinal Cord Injury		L1CAM interactions	5		0					0	0	3.1237e+06	3.6489e+06	4.11497e+06	3.62919e+06	404924	1	661607	661607	19.3356
n/a	High	Master Protein	Q3LXA3	Triokinase/FMN cyclase [OS=Homo sapiens]		0.007	5	2	3	2	575	58.9	7.49	2.52	defense response;metabolic process;regulation of biological process;response to stimulus	cytosol;nucleus	catalytic activity;metal ion binding;nucleotide binding;protein binding	Pf02733, Pf02734	26007	ENSG00000149476.15	DAK; TKFC	11	RIG-I-like Receptor Signaling	Metabolic pathways; Glycerolipid metabolism; RIG-I-like receptor signaling pathway; Carbon metabolism; Fructose and mannose metabolism	Fructose catabolism; DDX58/IFIH1-mediated induction of interferon-alpha/beta	13	4.96	0.000873362					0	0			4.15727e+06	4.15727e+06	0	1	638530	638530	19.2844
n/a	Medium	Master Protein	P08571	Monocyte differentiation antigen CD14 [OS=Homo sapiens]		0.02	2	1	1	1	375	40.1	6.23	0	cell death;defense response;regulation of biological process;response to stimulus;transport	cell surface;extracellular;Golgi;membrane	protein binding;receptor activity;signal transducer activity		929	ENSG00000170458.13	CD14	5	Regulation of toll-like receptor signaling pathway; Pathogenic Escherichia coli infection; MAPK Signaling Pathway; Regulation of Actin Cytoskeleton; Toll-like receptor signaling pathway	Salmonella infection; MAPK signaling pathway; Regulation of actin cytoskeleton; Pertussis; Pathogenic Escherichia coli infection; NF-kappa B signaling pathway; Toll-like receptor signaling pathway; Hematopoietic cell lineage; Transcriptional misregulation in cancer; Amoebiasis; Phagosome; Tuberculosis; Legionellosis	MyD88:Mal cascade initiated on plasma membrane; IRAK2 mediated activation of TAK1 complex upon TLR7/8 or 9 stimulation; IKK complex recruitment mediated by RIP1; Ligand-dependent caspase activation; IRAK4 deficiency (TLR2/4); ER-Phagosome pathway; TRAF6-mediated induction of TAK1 complex within TLR4 complex; Activated TLR4 signalling; Neutrophil degranulation; Activation of IRF3/IRF7 mediated by …	56		0					0	0		4.2795e+06	4.21495e+06	4.24723e+06	32277.3	1	498937	498937	18.9285
n/a	Medium	Master Protein	P53582	Methionine aminopeptidase 1 [OS=Homo sapiens]		0.023	2	1	2	1	386	43.2	7.17	0	metabolic process;regulation of biological process	cytoplasm;cytosol	catalytic activity;metal ion binding	Pf00557	23173	ENSG00000164024.11	METAP1	4			Signaling by GPCR; Inactivation, recovery and regulation of the phototransduction cascade	5		0					0	0	3.43e+06	6.83949e+06	5.94773e+06	5.40574e+06	1.44372e+06	1	408952	408952	18.6416
n/a	Medium	Master Protein	P01876	immunoglobulin heavy constant alpha 1 [OS=Homo sapiens]		0.015	3	1	1	1	353	37.6	6.51	1.77	cell organization and biogenesis;cellular component movement;defense response;metabolic process;regulation of biological process;response to stimulus;transport	extracellular;membrane	protein binding	Pf07654, Pf08205	3493	ENSG00000211895.4; ENSG00000282633.1	IGHA1	14; CHR_HSCHR14_3_CTG1	Inflammatory Response Pathway		Scavenging of heme from plasma; Cell surface interactions at the vascular wall	6		0					0	0		6.27912e+06		6.27912e+06	0	1	244181	244181	17.8976
n/a	High	Master Protein	Q9BUL8	programmed cell death protein 10 [OS=Homo sapiens]		0.001	5	1	7	1	212	24.7	8.19	7.39	cell death;cell organization and biogenesis;cellular component movement;regulation of biological process;response to stimulus	cytoplasm;cytosol;Golgi;membrane	protein binding	Pf06840	11235	ENSG00000114209.14	PDCD10	3				0	2.18	0.00651466					0	0	5.32313e+06	7.64965e+06	7.69615e+06	6.88965e+06	1.10785e+06	1	228661	228661	17.8029
n/a	High	Master Protein	Q4VC31	coiled-coil domain-containing protein 58 [OS=Homo sapiens]		0.001	19	2	15	2	144	16.6	7.81	14.19		mitochondrion		Pf09774	131076	ENSG00000160124.9	CCDC58	3				0	3.93	0.000798722					0	0	5.0444e+06	8.21033e+06	8.32556e+06	7.19343e+06	1.52032e+06	1	69219.1	69219.1	16.0789
n/a	Medium	Master Protein	P36969	Phospholipid hydroperoxide glutathione peroxidase, mitochondrial [OS=Homo sapiens]		0.018	4	1	4	1	197	22.2	8.37	1.69	cell organization and biogenesis;development;metabolic process;response to stimulus	cytoplasm;cytosol;mitochondrion;nucleus	antioxidant activity;catalytic activity;protein binding	Pf00255	2879	ENSG00000167468.16	GPX4	19	Glutathione metabolism; Selenium Micronutrient Network; Folate Metabolism; Selenium Metabolism and Selenoproteins; One carbon metabolism and related pathways; Metapathway biotransformation	Glutathione metabolism	Synthesis of 12-eicosatetraenoic acid derivatives; Synthesis of 15-eicosatetraenoic acid derivatives; Synthesis of 5-eicosatetraenoic acids	14		0					0	0	7.12487e+06	8.38716e+06	9.87567e+06	8.46257e+06	1.12428e+06	1	23135.5	23135.5	14.4978
n/a	Medium	Master Protein	Q9UI30	Multifunctional methyltransferase subunit TRM112-like protein [OS=Homo sapiens]		0.018	6	1	4	1	125	14.2	5.26	1.7	cell organization and biogenesis;metabolic process;regulation of biological process	cytoplasm;cytosol;nucleus	catalytic activity;protein binding	Pf03966	51504	ENSG00000173113.6	TRMT112	11			tRNA modification in the nucleus and cytosol; Eukaryotic Translation Termination; rRNA modification in the nucleus and cytosol; Methylation	13		0					0	0	8.15918e+06	9.88438e+06	1.02312e+07	9.42492e+06	906138	1	16448.8	16448.8	14.0057
n/a	Medium	Master Protein	A6NEY8	Putative prolyl-tRNA synthetase associated domain-containing protein 1 [OS=Homo sapiens]		0.011	6	1	2	1	169	18.6	6.25	1.85	regulation of biological process		catalytic activity	Pf04073	344405		PRORSD1P	2				0		0					0	0				0	0	23091.6	1.1745e+07	508.626	8.99046
n/a	Medium	Master Protein	P29034	protein S100-A2 [OS=Homo sapiens]		0.019	9	1	1	1	98	11.1	4.78	0	cellular component movement		metal ion binding;protein binding	Pf01023, Pf13499	6273		S100A2	1				0		0					0	0				0	0	7911.64	1.34857e+06	170.454	7.41324
n/a	Medium	Master Protein	P33552	cyclin-dependent kinases regulatory subunit 2 [OS=Homo sapiens]		0.021	8	1	1	1	79	9.9	8.46	0	cell division;cell organization and biogenesis;cell proliferation;regulation of biological process		enzyme regulator activity;protein binding	Pf01111	1164	ENSG00000123975.4	CKS2	9		Pathways in cancer; Small cell lung cancer		2		0					0	0				0	0	852640	1.311e+07	15.3758	3.94259
n/a	High	Master Protein	Q6JBY9	CapZ-interacting protein [OS=Homo sapiens]		0.001	4	1	6	1	416	44.5	5.4	7.59	response to stimulus		protein binding	Pf05177, Pf15255	92241	ENSG00000198771.10	RCSD1	1				0	4.83	0.000863558					0	0				0	0	45369.1	653426	14.4024	3.84824
n/a	High	Master Protein	B5MCY1	Tudor domain-containing protein 15 [OS=Homo sapiens]		0.01	1	1	1	1	1934	221.6	7.03	1.87				Pf00567	100129278	ENSG00000218819.4	LOC100129278; TDRD15	2				0		0					0	0				0	0	365725	4.68813e+06	12.8187	3.68018
n/a	High	Master Protein	P27482	Calmodulin-like protein 3 [OS=Homo sapiens]		0.009	18	3	3	1	149	16.9	4.42	2.16			metal ion binding;protein binding	Pf00036, Pf08726, Pf13202, Pf13405, Pf13499, Pf13833	810	ENSG00000178363.4	CALML3	10	Alzheimers Disease	Vascular smooth muscle contraction; Pertussis; Glioma; cAMP signaling pathway; Oxytocin signaling pathway; Inflammatory mediator regulation of TRP channels; Amphetamine addiction; Alzheimer's disease; Dopaminergic synapse; Tuberculosis; Circadian entrainment; Ras signaling pathway; Neurotrophin signaling pathway; Gastric acid secretion; Phosphatidylinositol signaling system; Estrogen signaling pa…		33		0					0	0				0	0	1.33275e+06	1.38957e+07	10.4263	3.38216
n/a	Medium	Master Protein	Q8WVV4-1	Isoform 1 of Protein POF1B [OS=Homo sapiens]		0.024	1	1	1	1	595	68.7	6.35	1.6	cell organization and biogenesis		protein binding		79983	ENSG00000124429.17	POF1B	X				0		0					0	0				0	0	1.11723e+06	1.13864e+07	10.1917	3.34932
n/a	Medium	Master Protein	P14174	Macrophage Migration inhibitory factor [OS=Homo sapiens]		0.021	8	1	1	1	115	12.5	7.88	0	cell organization and biogenesis;cell proliferation;cellular component movement;defense response;metabolic process;regulation of biological process;response to stimulus;transport	cell surface;cytoplasm;cytosol;extracellular;organelle lumen	catalytic activity;protein binding	Pf01187	4282	ENSG00000276701.2; ENSG00000240972.1	MIF	22; CHR_HSCHR22_1_CTG7	Adipogenesis; Spinal Cord Injury	Phenylalanine metabolism; Tyrosine metabolism	Gene and protein expression by JAK-STAT signaling after Interleukin-12 stimulation; Neutrophil degranulation; Interleukin-12 family signaling; Cell surface interactions at the vascular wall	13		0					0	0				0	0	675913	6.79461e+06	10.0525	3.32948
n/a	High	Master Protein	P07996	thrombospondin-1 [OS=Homo sapiens]		0.007	1	1	2	1	1170	129.3	4.94	2.62	cell organization and biogenesis;cellular component movement;defense response;metabolic process;regulation of biological process;response to stimulus;transport	cell surface;cytoplasm;endoplasmic reticulum;extracellular;organelle lumen	metal ion binding;protein binding	Pf00090, Pf00093, Pf02412, Pf05735, Pf12947	7057	ENSG00000137801.10	THBS1	15	Bladder Cancer; Apoptosis-related network due to altered Notch3 in ovarian cancer; miRNA targets in ECM and membrane receptors; Focal Adhesion; TGF-beta Signaling Pathway; Focal Adhesion-PI3K-Akt-mTOR-signaling pathway; Inflammatory Response Pathway; TGF-beta Receptor Signaling; Senescence and Autophagy in Cancer	MicroRNAs in cancer; Bladder cancer; Phagosome; PI3K-Akt signaling pathway; Proteoglycans in cancer; Focal adhesion; Rap1 signaling pathway; ECM-receptor interaction; TGF-beta signaling pathway; p53 signaling pathway; Malaria	Platelet degranulation ; Integrin cell surface interactions; RUNX1 regulates genes involved in megakaryocyte differentiation and platelet function; Defective B3GALTL causes Peters-plus syndrome (PpS); O-glycosylation of TSR domain-containing proteins; Signaling by PDGF; Syndecan interactions	44		0					0	0				0	0	1.40661e+06	9.16245e+06	6.51386	2.70351
n/a	High	Master Protein	P02788	Lactotransferrin [OS=Homo sapiens]		0	41	26	81	1	710	78.1	8.12	167.44	cellular homeostasis;defense response;metabolic process;regulation of biological process;response to stimulus;transport	cell surface;cytoplasm;extracellular;nucleus;organelle lumen	catalytic activity;DNA binding;enzyme regulator activity;metal ion binding;protein binding	Pf00405	4057	ENSG00000012223.12	LTF	3			Neutrophil degranulation; Mtb iron assimilation by chelation; Amyloid fiber formation; Metal sequestration by antimicrobial proteins	12		0					0	0				0	0	1.83353e+06	1.13727e+07	6.20261	2.63287
n/a	Medium	Master Protein	P29122	proprotein convertase subtilisin/kexin type 6 [OS=Homo sapiens]		0.023	1	1	2	1	969	106.4	7.68	0	cell death;metabolic process;regulation of biological process;response to stimulus;transport	cell surface;endoplasmic reticulum;extracellular;membrane;organelle lumen	catalytic activity;nucleotide binding;protein binding;receptor activity;signal transducer activity	Pf00082, Pf00757, Pf01483, Pf03302, Pf08686, Pf14843	5046	ENSG00000140479.16	PCSK6	15			Signaling by NODAL; Assembly of active LPL and LIPC lipase complexes; Formation of the cornified envelope; Signalling by NGF; NGF processing	12		0					0	0				0	0	1.26672e+06	7.64573e+06	6.03584	2.59356
n/a	High	Master Protein	P08962	CD63 antigen [OS=Homo sapiens]		0.005	4	1	3	1	238	25.6	7.81	4.8	cell differentiation;cellular component movement;regulation of biological process;response to stimulus;transport	cell surface;endosome;extracellular;membrane;organelle lumen;vacuole	protein binding	Pf00335	967	ENSG00000135404.11	CD63	12		Lysosome; Proteoglycans in cancer	Platelet degranulation ; Neutrophil degranulation	9		0					0	0				0	0	2.13541e+06	1.27523e+07	5.97182	2.57817
n/a	High	Master Protein	P08514-1	integrin alpha-IIb [OS=Homo sapiens]		0.006	3	2	3	2	1039	113.3	5.38	3.95	cell organization and biogenesis;regulation of biological process;response to stimulus;transport	cell surface;membrane	metal ion binding;protein binding	Pf00357, Pf01839, Pf08441, Pf13517	3674	ENSG00000005961.17	ITGA2B	17	Integrin-mediated Cell Adhesion; Arrhythmogenic Right Ventricular Cardiomyopathy; Focal Adhesion; Focal Adhesion-PI3K-Akt-mTOR-signaling pathway	Hypertrophic cardiomyopathy (HCM); Regulation of actin cytoskeleton; Dilated cardiomyopathy; ECM-receptor interaction; Pathways in cancer; Platelet activation; Hematopoietic cell lineage; PI3K-Akt signaling pathway; Arrhythmogenic right ventricular cardiomyopathy (ARVC); Small cell lung cancer; Focal adhesion; Rap1 signaling pathway	Integrin cell surface interactions; Signaling by BRAF and RAF fusions; Signal transduction by L1; RUNX1 regulates genes involved in megakaryocyte differentiation and platelet function; MAP2K and MAPK activation; GRB2:SOS provides linkage to MAPK signaling for Integrins ; Signaling by RAS mutants; Signaling by high-kinase activity BRAF mutants; Signaling by moderate kinase activity BRAF mutants; p…	54	1.92	0.0112219					0	0				0	0	2.65054e+06	1.5523e+07	5.85653	2.55005
n/a	Medium	Master Protein	O75096	Low-density lipoprotein receptor-related protein 4 [OS=Homo sapiens]		0.021	1	1	1	1	1905	211.9	5.27	0	cell differentiation;cell organization and biogenesis;development;regulation of biological process;response to stimulus;transport	cell surface;membrane	metal ion binding;protein binding;receptor activity;signal transducer activity	Pf00057, Pf00058, Pf07645, Pf08450, Pf12662, Pf14670	4038	ENSG00000134569.9	LRP4	11			ECM proteoglycans	2		0					0	0				0	0	1.93918e+07	9.57164e+07	4.93593	2.30332
n/a	Medium	Master Protein	Q8WVJ2	NudC domain-containing protein 2 [OS=Homo sapiens]		0.02	13	1	1	1	157	17.7	5.07	0	metabolic process	chromosome;cytoplasm;cytoskeleton;cytosol	protein binding	Pf04969	134492	ENSG00000170584.10	NUDCD2	5				0		0					0	0				0	0	1.02631e+07	4.98532e+07	4.85752	2.28022
n/a	Medium	Master Protein	Q5QJ74	Tubulin-specific chaperone cofactor E-like protein [OS=Homo sapiens]		0.02	2	1	1	1	424	48.2	5.38	0		cytoplasm;cytoskeleton	protein binding	Pf12799, Pf14560, Pf14580	219899	ENSG00000154114.12	TBCEL	11				0		0					0	0				0	0	2.29076e+06	1.10323e+07	4.81602	2.26784
n/a	Medium	Master Protein	Q9Y6W5	Wiskott-Aldrich syndrome protein family member 2 [OS=Homo sapiens]		0.023	2	1	2	1	498	54.3	5.53	0	cell organization and biogenesis;cellular component movement;regulation of biological process;response to stimulus;transport	cytoplasm;cytoskeleton;cytosol;endosome	protein binding		10163	ENSG00000158195.10	WASF2	1	Regulation of Actin Cytoskeleton	Regulation of actin cytoskeleton; Shigellosis; Salmonella infection; Bacterial invasion of epithelial cells; Adherens junction; Choline metabolism in cancer; Fc gamma R-mediated phagocytosis	Regulation of actin dynamics for phagocytic cup formation; VEGFA-VEGFR2 Pathway; RHO GTPases Activate WASPs and WAVEs	19		0					0	0				0	0	709375	3.21442e+06	4.53134	2.17994
n/a	Medium	Master Protein	Q13464	Rho-associated protein kinase 1 [OS=Homo sapiens]		0.011	1	1	1	1	1354	158.1	5.9	1.8	cell death;cell organization and biogenesis;cellular component movement;metabolic process;regulation of biological process;response to stimulus;transport	cytoplasm;cytoskeleton;cytosol;extracellular;Golgi;membrane;organelle lumen	catalytic activity;metal ion binding;motor activity;nucleotide binding;protein binding	Pf00069, Pf00130, Pf00169, Pf00433, Pf01576, Pf02463, Pf03962, Pf04111, Pf04156, Pf05557, Pf05622, Pf06160, Pf07714, Pf07888, Pf08912, Pf09726, Pf09789, Pf10174, Pf12128, Pf12795, Pf14531, Pf14915, Pf15619	6093	ENSG00000067900.7	ROCK1	18	Androgen receptor signaling pathway; MicroRNAs in cardiomyocyte hypertrophy; Integrin-mediated Cell Adhesion; Leptin signaling pathway; Regulation of Microtubule Cytoskeleton; Pathogenic Escherichia coli infection; AGE/RAGE pathway; Focal Adhesion; TGF-beta Signaling Pathway; VEGFA-VEGFR2 Signaling Pathway; Chemokine signaling pathway; EGF/EGFR Signaling Pathway; Regulation of Actin Cytoskeleton;…	Sphingolipid signaling pathway; Proteoglycans in cancer; MicroRNAs in cancer; cAMP signaling pathway; Regulation of actin cytoskeleton; Pathways in cancer; Vascular smooth muscle contraction; Shigellosis; Chemokine signaling pathway; cGMP-PKG signaling pathway; Leukocyte transendothelial migration; Pathogenic Escherichia coli infection; Salmonella infection; TGF-beta signaling pathway; Platelet a…	EPHA-mediated growth cone collapse; G alpha (12/13) signalling events; EPHB-mediated forward signaling; RHO GTPases Activate ROCKs; Neutrophil degranulation; Sema4D induced cell migration and growth-cone collapse; Apoptotic cleavage of cellular proteins; VEGFA-VEGFR2 Pathway	57		0					0	0				0	0	944226	4.23847e+06	4.48883	2.16634
n/a	Medium	Master Protein	Q14764	major vault protein [OS=Homo sapiens]		0.023	2	2	2	2	893	99.3	5.48	0	regulation of biological process;response to stimulus;transport	cytoplasm;cytoskeleton;cytosol;extracellular;membrane;nucleus;organelle lumen	protein binding	Pf01145, Pf01505, Pf11978	9961	ENSG00000013364.18	MVP	16			Neutrophil degranulation	3		0					0	0				0	0	2.82865e+06	1.26934e+07	4.48743	2.16589
n/a	High	Master Protein	P00491	purine nucleoside phosphorylase [OS=Homo sapiens]		0.006	10	2	4	2	289	32.1	6.95	4.29	metabolic process;regulation of biological process;response to stimulus;transport	cytoplasm;cytoskeleton;cytosol;extracellular;nucleus;organelle lumen	catalytic activity	Pf01048	4860	ENSG00000198805.11	PNP	14		Nicotinate and nicotinamide metabolism; Pyrimidine metabolism; Purine metabolism; Metabolic pathways	Neutrophil degranulation; Purine salvage; Purine catabolism	13	10.95	0.00143885					0	0				0	0	688811	3.08099e+06	4.47291	2.16121
n/a	Medium	Master Protein	P55008-1	Allograft inflammatory factor 1 [OS=Homo sapiens]		0.023	7	1	3	1	147	16.7	6.24	0	cell communication;cell organization and biogenesis;defense response;regulation of biological process;response to stimulus	cytoplasm;cytoskeleton;cytosol;membrane;nucleus	metal ion binding;protein binding	Pf13499	199	ENSG00000234836.7; ENSG00000235985.7; ENSG00000204472.12; ENSG00000206428.9; ENSG00000235588.8; ENSG00000237727.7	AIF1	6; CHR_HSCHR6_MHC_DBB_CTG1; CHR_HSCHR6_MHC_MCF_CTG1; CHR_HSCHR6_MHC_QBL_CTG1; CHR_HSCHR6_MHC_SSTO_CTG1; CHR_HSCHR6_MHC_COX_CTG1	Spinal Cord Injury			1		0					0	0				0	0	2.4369e+06	1.06218e+07	4.35872	2.12391
n/a	Medium	Master Protein	O75832	26S proteasome non-ATPase regulatory subunit 10 [OS=Homo sapiens]		0.023	3	1	2	1	226	24.4	6.1	0	cell death;cell organization and biogenesis;metabolic process;regulation of biological process;response to stimulus;transport	cytoplasm;cytoskeleton;cytosol;nucleus;proteasome	protein binding	Pf00023, Pf12796, Pf13606, Pf13637, Pf13857	5716	ENSG00000101843.18	PSMD10	X	Proteasome Degradation; Parkin-Ubiquitin Proteasomal System pathway		Regulation of RAS by GAPs; CDT1 association with the CDC6:ORC:origin complex; Downstream TCR signaling; UCH proteinases; NIK-->noncanonical NF-kB signaling; Hh mutants that don't undergo autocatalytic processing are degraded by ERAD; SCF-beta-TrCP mediated degradation of Emi1; Cross-presentation of soluble exogenous antigens (endosomes); Separation of Sister Chromatids; Vpu mediated degradation o…	150		0					0	0				0	0	1.0698e+06	4.31286e+06	4.03145	2.0113
n/a	Medium	Master Protein	Q6ZV73-1	FYVE, RhoGEF and PH domain-containing protein 6 [OS=Homo sapiens]		0.021	1	1	1	1	1430	160.7	7.03	0	cell organization and biogenesis;regulation of biological process	cytoplasm;cytoskeleton;Golgi	metal ion binding;protein binding	Pf00169, Pf00621, Pf01363, Pf15410, Pf15413	55785	ENSG00000180263.13	FGD6	12				0		0					0	0				0	0	4.36309e+06	1.75331e+07	4.0185	2.00666
n/a	High	Master Protein	P13489	Ribonuclease inhibitor [OS=Homo sapiens]		0.001	7	3	9	3	461	49.9	4.82	9.03	metabolic process;regulation of biological process	cytoplasm;cytosol	enzyme regulator activity;protein binding		6050	ENSG00000276230.4; ENSG00000023191.16	RNH1	11; CHR_HSCHR11_1_CTG8				0	6.49	0.00102041					0	0				0	0	504246	1.91609e+06	3.79992	1.92597
n/a	Medium	Master Protein	P14598	Neutrophil cytosol factor 1 [OS=Homo sapiens]		0.022	6	2	2	2	390	44.6	9.13	0	cell death;cell organization and biogenesis;cellular homeostasis;defense response;metabolic process;regulation of biological process;response to stimulus;transport	cytoplasm;cytosol;endoplasmic reticulum;Golgi;membrane;vacuole	catalytic activity;enzyme regulator activity;protein binding	Pf00018, Pf00787, Pf07653, Pf08944, Pf14604	653361		NCF1	7	AGE/RAGE pathway; Brain-Derived Neurotrophic Factor (BDNF) signaling pathway; VEGFA-VEGFR2 Signaling Pathway; Chemokine signaling pathway; Microglia Pathogen Phagocytosis Pathway	Fc gamma R-mediated phagocytosis; Osteoclast differentiation; Chemokine signaling pathway; Leishmaniasis; Phagosome; Leukocyte transendothelial migration	ROS, RNS production in phagocytes; Cross-presentation of particulate exogenous antigens (phagosomes); VEGFA-VEGFR2 Pathway; Detoxification of Reactive Oxygen Species; RHO GTPases Activate NADPH Oxidases	28	2.59	0.004811					0	0				0	0	1.80165e+07	6.74604e+07	3.74437	1.90472
n/a	Medium	Master Protein	P30626-1	Sorcin [OS=Homo sapiens]		0.02	6	1	1	1	198	21.7	5.59	0	metabolic process;regulation of biological process;response to stimulus;transport	cytoplasm;cytosol;endoplasmic reticulum;membrane;mitochondrion	catalytic activity;metal ion binding;protein binding	Pf13405, Pf13499, Pf13833	6717	ENSG00000075142.13	SRI	7			Ion homeostasis; Sodium/Calcium exchangers; Ion transport by P-type ATPases; Reduction of cytosolic Ca++ levels; Stimuli-sensing channels	14		0					0	0				0	0	473536	1.69432e+06	3.57802	1.83916
n/a	Medium	Master Protein	Q99732	Lipopolysaccharide-induced tumor necrosis factor-alpha factor [OS=Homo sapiens]		0.024	4	1	3	1	161	17.1	6.44	0	metabolic process;regulation of biological process;response to stimulus	cytoplasm;cytosol;endosome;Golgi;membrane;nucleus;vacuole	DNA binding;metal ion binding;protein binding;signal transducer activity	Pf10601	9516	ENSG00000189067.12	LITAF	16		Lysosome		1		0					0	0				0	0	2.55361e+07	9.08975e+07	3.55957	1.8317
n/a	Medium	Master Protein	P07384	Calpain-1 catalytic subunit [OS=Homo sapiens]		0.018	3	2	3	2	714	81.8	5.67	1.7	cell death;cell organization and biogenesis;metabolic process;regulation of biological process;transport	cytoplasm;cytosol;extracellular;membrane;mitochondrion;vacuole	catalytic activity;metal ion binding;protein binding	Pf00648, Pf01067, Pf13833	823	ENSG00000014216.15	CAPN1	11	Integrin-mediated Cell Adhesion; Alzheimers Disease; Focal Adhesion	Alzheimer's disease; Protein processing in endoplasmic reticulum; Apoptosis	Degradation of the extracellular matrix; Formation of the cornified envelope; Neutrophil degranulation; Deregulated CDK5 triggers multiple neurodegenerative pathways in Alzheimer's disease models	17	2.87	0.002849					0	0				0	0	2.42836e+06	8.20814e+06	3.38011	1.75707
n/a	High	Master Protein	P22392	nucleoside diphosphate kinase b [OS=Homo sapiens]		0.001	29	4	10	1	152	17.3	8.41	8.23	cell organization and biogenesis;cellular homeostasis;metabolic process;regulation of biological process;response to stimulus;transport	cytoplasm;cytosol;extracellular;membrane;nucleus;organelle lumen	catalytic activity;DNA binding;metal ion binding;nucleotide binding;protein binding	Pf00334	4831; 654364	ENSG00000243678.11	NME2; NME1-NME2	17	Nucleotide Metabolism	Pyrimidine metabolism; Purine metabolism; Metabolic pathways	Interconversion of nucleotide di- and triphosphates; Neutrophil degranulation	10		0					0	0				0	0	496009	1.6554e+06	3.33744	1.73874
n/a	High	Master Protein	P02771	Alpha-fetoprotein [OS=Homo sapiens]		0.009	2	1	2	1	609	68.6	5.68	2.04	metabolic process;regulation of biological process;reproduction;response to stimulus;transport	cytoplasm;cytosol;extracellular;organelle lumen	metal ion binding;protein binding	Pf00273	174	ENSG00000081051.7	AFP	4		Hippo signaling pathway	Post-translational protein phosphorylation; Regulation of Insulin-like Growth Factor (IGF) transport and uptake by Insulin-like Growth Factor Binding Proteins (IGFBPs)	5		0					0	0				0	0	2.10985e+06	6.90372e+06	3.27215	1.71024
n/a	High	Master Protein	Q86SU0-1	Immunoglobulin-like domain-containing receptor 1 [OS=Homo sapiens]		0.006	1	1	2	1	546	62.8	8.81	4.05	cell organization and biogenesis;regulation of biological process;transport	cytoplasm;cytosol;membrane	protein binding;receptor activity		286676	ENSG00000145103.12	ILDR1	3				0		0					0	0				0	0	8.25985e+07	2.65902e+08	3.21921	1.68671
n/a	Medium	Master Protein	P50579	methionine aminopeptidase 2 [OS=Homo sapiens]		0.022	4	1	1	1	478	52.9	5.82	0	metabolic process;regulation of biological process	cytoplasm;cytosol;membrane	catalytic activity;metal ion binding;RNA binding	Pf00557	10988	ENSG00000111142.13	METAP2	12			Signaling by GPCR; Inactivation, recovery and regulation of the phototransduction cascade	5		0					0	0				0	0	3.06056e+06	9.73711e+06	3.18148	1.6697
n/a	High	Master Protein	P14317	Hematopoietic lineage cell-specific protein [OS=Homo sapiens]		0.007	7	3	5	3	486	54	4.81	2.71	cell differentiation;cell organization and biogenesis;regulation of biological process;response to stimulus	cytoplasm;cytosol;membrane;mitochondrion;nucleus	protein binding	Pf00018, Pf02218, Pf07653, Pf14604	3059	ENSG00000180353.10	HCLS1	3	Pathogenic Escherichia coli infection; B Cell Receptor Signaling Pathway; TYROBP Causal Network	Bacterial invasion of epithelial cells; Shigellosis; Tight junction; Pathogenic Escherichia coli infection; Proteoglycans in cancer		8	9.6	0.00130378					0	0				0	0	272398	854244	3.13602	1.64893
n/a	High	Master Protein	Q01813	ATP-dependent 6-phosphofructokinase, platelet type [OS=Homo sapiens]		0.006	3	2	5	1	784	85.5	7.55	3.93	metabolic process	cytoplasm;cytosol;membrane;nucleus	catalytic activity;metal ion binding;nucleotide binding;protein binding	Pf00365	5214	ENSG00000067057.16	PFKP	10	Cori Cycle; Glycolysis and Gluconeogenesis	AMPK signaling pathway; Galactose metabolism; Biosynthesis of amino acids; Fructose and mannose metabolism; Central carbon metabolism in cancer; Glycolysis / Gluconeogenesis; Pentose phosphate pathway; Thyroid hormone signaling pathway; Metabolic pathways; Carbon metabolism; RNA degradation	Glycolysis	17		0					0	0				0	0	786750	2.44328e+06	3.10554	1.63484
n/a	Medium	Master Protein	Q16186	Proteasomal ubiquitin receptor ADRM1 [OS=Homo sapiens]		0.011	4	1	2	1	407	42.1	5.07	1.84	cell organization and biogenesis;metabolic process;regulation of biological process	cytoplasm;cytosol;membrane;nucleus;proteasome	enzyme regulator activity;protein binding	Pf04683	11047	ENSG00000130706.12	ADRM1	20			UCH proteinases; Ub-specific processing proteases	5	4.85	0.000865052					0	0				0	0	833364	2.58617e+06	3.10329	1.6338
n/a	Medium	Master Protein	O75891-1	Cytosolic 10-formyltetrahydrofolate dehydrogenase [OS=Homo sapiens]		0.02	1	1	1	1	902	98.8	5.94	0	metabolic process	cytoplasm;cytosol;mitochondrion	catalytic activity	Pf00171, Pf00550, Pf00551, Pf02911	10840	ENSG00000144908.13	ALDH1L1	3	Folate-Alcohol and Cancer Pathway; One Carbon Metabolism	One carbon pool by folate	Metabolism of folate and pterines	7		0					0	0				0	0	1.76189e+07	5.38865e+07	3.05845	1.6128
n/a	High	Master Protein	Q9BWD1	Acetyl-CoA acetyltransferase, cytosolic [OS=Homo sapiens]		0.002	7	1	2	1	397	41.3	6.92	6.46	metabolic process	cytoplasm;cytosol;mitochondrion;nucleus	catalytic activity;protein binding	Pf00108, Pf00109, Pf02803	39	ENSG00000120437.8	ACAT2	6		Fatty acid metabolism; Metabolic pathways; Carbon metabolism; Butanoate metabolism; Tryptophan metabolism; Synthesis and degradation of ketone bodies; Fatty acid degradation; Lysine degradation; Valine, leucine and isoleucine degradation; Propanoate metabolism; Glyoxylate and dicarboxylate metabolism; Fat digestion and absorption; Terpenoid backbone biosynthesis; Pyruvate metabolism	Cholesterol biosynthesis	18	12.16	0					0	0				0	0	890328	2.6832e+06	3.01372	1.59155
n/a	Medium	Master Protein	Q6N069	N-alpha-acetyltransferase 16, NatA auxiliary subunit [OS=Homo sapiens]		0.02	2	1	1	1	864	101.4	7.87	0	metabolic process;regulation of biological process	cytoplasm;cytosol;nucleus	catalytic activity;protein binding	Pf00515, Pf12569, Pf13414, Pf13432	79612	ENSG00000172766.18	NAA16	13				0		0					0	0				0	0	2.56273e+07	7.63638e+07	2.97978	1.57521
n/a	Medium	Master Protein	P18074-2	Isoform 2 of TFIIH basal transcription factor complex helicase XPD subunit [OS=Homo sapiens]		0.018	2	1	2	1	405	46.2	8.63	1.68	cell death;cell differentiation;cell division;cell organization and biogenesis;cell proliferation;metabolic process;regulation of biological process;response to stimulus	cytoplasm;cytosol;nucleus	catalytic activity;DNA binding;metal ion binding;nucleotide binding;protein binding	Pf06733, Pf06777	2068	ENSG00000104884.14	ERCC2	19	Fluoropyrimidine Activity; Eukaryotic Transcription Initiation			2	1.95	0.0107188					0	0				0	0	1.06406e+06	3.16997e+06	2.97912	1.57489
n/a	Medium	Master Protein	Q9NPP4-1	NLR family CARD domain-containing protein 4 [OS=Homo sapiens]		0.023	1	1	1	1	1024	116.1	6.77	1.62	cell death;cell organization and biogenesis;defense response;metabolic process;regulation of biological process;response to stimulus;transport	cytoplasm;cytosol;nucleus	catalytic activity;enzyme regulator activity;metal ion binding;nucleotide binding;protein binding	Pf00619, Pf05729	58484	ENSG00000091106.18	NLRC4	2	Nucleotide-binding Oligomerization Domain (NOD) pathway	Legionellosis; NOD-like receptor signaling pathway; Salmonella infection	The IPAF inflammasome; TP53 Regulates Transcription of Caspase Activators and Caspases	15		0					0	0				0	0	1.36403e+06	3.97018e+06	2.91063	1.54133
n/a	High	Master Protein	Q13867	bleomycin hydrolase [OS=Homo sapiens]		0.008	7	3	4	3	455	52.5	6.27	2.23	metabolic process;response to stimulus	cytoplasm;cytosol;nucleus	catalytic activity;protein binding	Pf03051	642	ENSG00000108578.14	BLMH	17			Antigen processing: Ubiquitination & Proteasome degradation	4	6.17	0.000994036					0	0				0	0	2.17937e+06	6.3076e+06	2.89424	1.53318
n/a	High	Master Protein	P40306	Proteasome subunit beta type-10 [OS=Homo sapiens]		0.009	4	1	1	1	273	28.9	7.81	2.14	metabolic process;regulation of biological process;response to stimulus;transport	cytoplasm;cytosol;nucleus;proteasome	catalytic activity;protein binding	Pf00227, Pf12465	5699	ENSG00000205220.11	PSMB10	16	Proteasome Degradation	Proteasome	Regulation of RAS by GAPs; CDT1 association with the CDC6:ORC:origin complex; Downstream TCR signaling; UCH proteinases; NIK-->noncanonical NF-kB signaling; Hh mutants that don't undergo autocatalytic processing are degraded by ERAD; SCF-beta-TrCP mediated degradation of Emi1; Cross-presentation of soluble exogenous antigens (endosomes); Separation of Sister Chromatids; Vpu mediated degradation o…	150		0					0	0				0	0	1.24636e+06	3.4957e+06	2.80473	1.48786
n/a	High	Master Protein	Q5T4F4-1	Protrudin [OS=Homo sapiens]		0.003	1	1	3	1	411	45.8	5.15	5.28	cell organization and biogenesis;regulation of biological process;response to stimulus;transport	cytoplasm;endoplasmic reticulum;endosome;membrane	metal ion binding;protein binding	Pf01363	118813	ENSG00000155256.17	ZFYVE27	10		Endocytosis		1		0					0	0				0	0	983022	2.69418e+06	2.74071	1.45455
		Master Protein	A1L4H1-1	Soluble scavenger receptor cysteine-rich domain-containing protein SSC5D [OS=Homo sapiens]			1	1	4	1	1573	165.6	6.13		defense response;development;regulation of biological process;response to stimulus;transport	cytoplasm;extracellular;membrane	protein binding;receptor activity	Pf00530	284297	ENSG00000179954.15	SSC5D	19			Scavenging by Class B Receptors	3	1.99	0.00887199					0	0				0	0	342449	914218	2.66965	1.41665
n/a	High	Master Protein	P02766	Transthyretin [OS=Homo sapiens]		0.009	10	1	2	1	147	15.9	5.76	2.04	cell organization and biogenesis;metabolic process;regulation of biological process;transport	cytoplasm;extracellular;organelle lumen	protein binding	Pf00576	7276	ENSG00000118271.9	TTR	18		Thyroid hormone synthesis	Signaling by GPCR; Neutrophil degranulation; The canonical retinoid cycle in rods (twilight vision); Amyloid fiber formation; Retinoid metabolism and transport; Retinoid cycle disease events; Non-integrin membrane-ECM interactions	20	4.3	0.000831255					0	0				0	0	4.15262e+06	1.10207e+07	2.65392	1.40813
n/a	High	Master Protein	O75695	Protein XRP2 [OS=Homo sapiens]		0.003	3	1	4	1	350	39.6	5.12	5.16	cell organization and biogenesis;metabolic process;regulation of biological process;transport	cytoplasm;Golgi;membrane	catalytic activity;enzyme regulator activity;nucleotide binding;protein binding	Pf00334, Pf07986	6102	ENSG00000102218.5	RP2	X			Trafficking of myristoylated proteins to the cilium	4	4.73	0.000858369					0	0				0	0	1.40527e+08	3.64937e+08	2.59692	1.3768
n/a	High	Master Protein	Q9NZJ4-1	Sacsin [OS=Homo sapiens]		0	1	4	17	1	4579	520.8	7.05	23.96	metabolic process;regulation of biological process	cytoplasm;mitochondrion;nucleus	protein binding	Pf00240, Pf05168	26278	ENSG00000151835.14	SACS	13				0		0					0	0				0	0	4.29695e+06	1.10065e+07	2.56148	1.35698
n/a	High	Master Protein	P49321-4	Isoform 4 of Nuclear autoantigenic sperm protein [OS=Homo sapiens]		0.005	4	2	5	2	724	78.4	4.27	4.48	cell organization and biogenesis;cell proliferation;metabolic process;response to stimulus;transport	cytoplasm;nucleus	protein binding	Pf00515, Pf10516, Pf13414, Pf13424	4678	ENSG00000132780.16	NASP	1				0	10.24	0.00138122					0	0				0	0	1.26295e+07	3.22797e+07	2.55589	1.35383
n/a	High	Master Protein	Q8TF42	ubiquitin-associated and SH3 domain-containing protein B [OS=Homo sapiens]		0.002	4	2	10	2	649	72.6	6.93	6.79	metabolic process;regulation of biological process;response to stimulus	cytoplasm;nucleus	catalytic activity;protein binding	Pf00018, Pf00300, Pf00627, Pf13563, Pf14604	84959	ENSG00000154127.9	UBASH3B	11				0	5.8	0.000943396					0	0				0	0	9.53885e+06	2.41962e+07	2.53659	1.34289
n/a	High	Master Protein	Q8TE96	ATP-dependent RNA helicase DQX1 [OS=Homo sapiens]		0.01	2	1	1	1	717	79.4	5.02	1.88	metabolic process	cytoplasm;nucleus;spliceosomal complex	catalytic activity;nucleotide binding;RNA binding	Pf07717, Pf10236, Pf13191, Pf13401	165545	ENSG00000144045.13	DQX1	2				0		0					0	0				0	0	7858.86	19901.1	2.53232	1.34046
n/a	Medium	Master Protein	Q17RB8	LON peptidase N-terminal domain and RING finger protein 1 [OS=Homo sapiens]		0.02	1	1	1	1	773	86.7	7.2	0	metabolic process;regulation of biological process	cytosol	catalytic activity;metal ion binding;protein binding	Pf00097, Pf02190, Pf13414, Pf13432, Pf13445, Pf13639, Pf13923, Pf14634, Pf14835, Pf15227	91694	ENSG00000154359.12	LONRF1	8			Antigen processing: Ubiquitination & Proteasome degradation	4		0					0	0				0	0	839636	2.12119e+06	2.52632	1.33704
n/a	High	Master Protein	Q13637	Ras-related protein Rab-32 [OS=Homo sapiens]		0.007	6	1	2	1	225	25	6.54	3.22	cell organization and biogenesis;regulation of biological process;response to stimulus;transport	cytosol;endoplasmic reticulum;endosome;Golgi;membrane;mitochondrion;organelle lumen	catalytic activity;nucleotide binding;protein binding	Pf00025, Pf00071, Pf04670, Pf08477, Pf13401	10981	ENSG00000118508.4	RAB32	6			RAB GEFs exchange GTP for GDP on RABs; RAB geranylgeranylation	7	9.16	0.00126422					0	0				0	0	4.12483e+06	1.04073e+07	2.52308	1.33519
n/a	Medium	Master Protein	Q9BXH1	Bcl-2-binding component 3 [OS=Homo sapiens]		0.022	4	1	1	1	193	20.5	8.78	0	cell death;cell organization and biogenesis;cellular homeostasis;metabolic process;regulation of biological process;response to stimulus;transport	cytosol;endoplasmic reticulum;membrane;mitochondrion;vacuole	protein binding		27113	ENSG00000105327.17	BBC3	19	miRNA Regulation of DNA Damage Response; TP53 Network; Integrated Cancer pathway; Apoptosis; Photodynamic therapy-induced unfolded protein response; DNA Damage Response	Platinum drug resistance; Apoptosis - multiple species; p53 signaling pathway; Huntington's disease; Measles; Apoptosis; Hippo signaling pathway	TP53 Regulates Transcription of Genes Involved in Cytochrome C Release; Activation of PUMA and translocation to mitochondria; BH3-only proteins associate with and inactivate anti-apoptotic BCL-2 members	25		0					0	0				0	0	1.80781e+06	4.49599e+06	2.48698	1.31439
n/a	High	Master Protein	P02748	complement component C9 [OS=Homo sapiens]		0.007	3	1	2	1	559	63.1	5.59	3.72	cell organization and biogenesis;defense response;metabolic process;regulation of biological process;response to stimulus	cytosol;extracellular;membrane	protein binding	Pf00057, Pf00090, Pf01823	735	ENSG00000113600.10	C9	5	Allograft Rejection; Complement Activation; Complement and Coagulation Cascades	Systemic lupus erythematosus; Prion diseases; Complement and coagulation cascades; Amoebiasis	Terminal pathway of complement; Regulation of Complement cascade	12	5.99	0.000970874					0	0				0	0	415351	1.0281e+06	2.47527	1.30759
		Master Protein	P46976-3	Isoform GN-1S of Glycogenin-1 [OS=Homo sapiens]			6	1	1	1	279	31.4	6.61		metabolic process;transport	cytosol;extracellular;membrane;organelle lumen	catalytic activity;metal ion binding;protein binding	Pf01501	2992	ENSG00000163754.17	GYG1	3	Insulin Signaling; Glycogen Metabolism			2	5.7	0.000937207	Acetyl [N-Term]				0	0				0	0	7.52907e+06	1.86098e+07	2.47173	1.30552
n/a	Medium	Master Protein	P02774	vitamin D-binding protein [OS=Homo sapiens]		0.018	4	2	7	2	474	52.9	5.54	1.68	metabolic process;transport	cytosol;extracellular;organelle lumen	protein binding;transporter activity	Pf15024	2638		GC	4	Vitamin D Metabolism		Vitamin D (calciferol) metabolism	5	2.21	0.00589391					0	0				0	0	1.9146e+08	4.72138e+08	2.46599	1.30217
n/a	Medium	Master Protein	Q9Y450-1	HBS1-like protein [OS=Homo sapiens]		0.022	2	1	1	1	684	75.4	6.61	0	metabolic process;regulation of biological process;response to stimulus	cytosol;membrane	catalytic activity;nucleotide binding;protein binding;RNA binding	Pf00009, Pf03143, Pf03144, Pf08938	10767	ENSG00000112339.14	HBS1L	6		Legionellosis; mRNA surveillance pathway	mRNA decay by 3' to 5' exoribonuclease	5		0					0	0				0	0	1.87154e+07	4.61408e+07	2.46539	1.30181
n/a	High	Master Protein	Q9UNY5	Zinc finger protein 232 [OS=Homo sapiens]		0.009	5	1	1	1	417	47.7	6.74	2.08	metabolic process;regulation of biological process	cytosol;nucleus	DNA binding;metal ion binding;protein binding	Pf00096, Pf02023, Pf13465	7775		ZNF232	17				0		0	Acetyl [N-Term]				0	0				0	0	9.90037e+06	2.43657e+07	2.46109	1.2993
n/a	High	Master Protein	Q01546	Keratin, type II cytoskeletal 2 oral [OS=Homo sapiens]		0	13	15	88	1	638	65.8	8.12	119.74	cell death;cell organization and biogenesis	cytosol;nucleus	structural molecule activity	Pf00038, Pf11559	51350	ENSG00000185069.2	KRT76	12			Formation of the cornified envelope	3		0					0	0				0	0	727585	1.77334e+06	2.43729	1.28528
n/a	Medium	Master Protein	Q6P4A8	Phospholipase B-like 1 [OS=Homo sapiens]		0.023	2	1	3	1	553	63.2	9.06	0	metabolic process	cytosol;vacuole	catalytic activity	Pf04916	79887	ENSG00000121316.10	PLBD1	12			Acyl chain remodelling of PI; Hydrolysis of LPC; Acyl chain remodelling of PE; Acyl chain remodelling of PC	8		0					0	0				0	0	2.54517e+07	6.16052e+07	2.42047	1.27529
n/a	High	Master Protein	Q9Y2G3	Probable phospholipid-transporting ATPase IF [OS=Homo sapiens]		0.002	1	2	7	2	1177	134.1	6.96	6.7	cell organization and biogenesis;transport	endoplasmic reticulum;endosome;Golgi;membrane	catalytic activity;metal ion binding;nucleotide binding;protein binding;transporter activity	Pf00122, Pf00689, Pf00702, Pf08282, Pf13246, Pf13347	23200	ENSG00000058063.15	ATP11B	3			Neutrophil degranulation; Ion transport by P-type ATPases	6	5.76	0.000942507					0	0				0	0	1.18026e+07	2.84907e+07	2.41393	1.27138
n/a	Medium	Master Protein	Q6VVX0	Vitamin D 25-hydroxylase [OS=Homo sapiens]		0.021	1	1	1	1	501	57.3	7.61	0	metabolic process;response to stimulus	endoplasmic reticulum;membrane	catalytic activity;metal ion binding	Pf00067	120227	ENSG00000186104.10	CYP2R1	11	Vitamin D Metabolism; Oxidation by Cytochrome P450; Metapathway biotransformation	Metabolic pathways; Steroid biosynthesis	Defective CYP2R1 causes Rickets vitamin D-dependent 1B (VDDR1B); Vitamins; Vitamin D (calciferol) metabolism	17		0					0	0				0	0	901565	2.17561e+06	2.41315	1.27092
n/a	High	Master Protein	Q00765	Receptor expression-enhancing protein 5 [OS=Homo sapiens]		0.002	10	3	6	3	189	21.5	8.1	6.58		endoplasmic reticulum;membrane	protein binding	Pf03134	7905	ENSG00000129625.12	REEP5	5			Olfactory Signaling Pathway; GPCR downstream signalling	4	1.99	0.00888889					0	0				0	0	7.62175e+06	1.82219e+07	2.39077	1.25748
n/a	Medium	Master Protein	Q15125	3-beta-hydroxysteroid-delta(8),delta(7)-isomerase [OS=Homo sapiens]		0.02	5	1	1	1	230	26.3	7.9	0	metabolic process;regulation of biological process;response to stimulus;transport	endoplasmic reticulum;membrane;nucleus	catalytic activity;protein binding;receptor activity;signal transducer activity;transporter activity	Pf05241	10682	ENSG00000147155.10	EBP	X		Metabolic pathways; Steroid biosynthesis	Cholesterol biosynthesis via desmosterol; Cholesterol biosynthesis via lathosterol	8		0					0	0				0	0	4.74924e+06	1.1242e+07	2.36712	1.24313
n/a	High	Master Protein	Q9HCN8	Stromal cell-derived factor 2-like protein 1 [OS=Homo sapiens]		0.009	3	1	1	1	221	23.6	7.03	2.02	metabolic process;regulation of biological process;response to stimulus	endoplasmic reticulum;membrane;organelle lumen	catalytic activity;protein binding	Pf02815	23753	ENSG00000128228.4	SDF2L1	22				0		0					0	0				0	0	2.01407e+06	4.76345e+06	2.36509	1.24189
n/a	High	Master Protein	P35030	Trypsin-3 [OS=Homo sapiens]		0.001	4	1	8	1	304	32.5	7.49	8.35	cellular component movement;metabolic process;response to stimulus;transport	extracellular	catalytic activity;metal ion binding;protein binding	Pf00089	5646	ENSG00000010438.16	PRSS3	9		Influenza A; Neuroactive ligand-receptor interaction; Protein digestion and absorption; Pancreatic secretion	Alpha-defensins; Cobalamin (Cbl, vitamin B12) transport and metabolism; Neutrophil degranulation	14	3.86	0.000793021					0	0				0	0	1.22028e+07	2.88589e+07	2.36494	1.2418
n/a	High	Master Protein	Q96PD5-2	Isoform 2 of N-acetylmuramoyl-L-alanine amidase [OS=Homo sapiens]		0.007	2	1	3	1	634	68	7.68	3.07	defense response;metabolic process;regulation of biological process;response to stimulus	extracellular;membrane	catalytic activity;metal ion binding;receptor activity;signal transducer activity	Pf01510	114770	ENSG00000161031.12	PGLYRP2	19				0	2.42	0.00472016					0	0				0	0	5.0184e+06	1.18243e+07	2.35619	1.23646
n/a	Medium	Master Protein	Q6UX27	V-set and transmembrane domain-containing protein 1 [OS=Homo sapiens]		0.02	3	1	1	1	236	26.1	5.06	0	regulation of biological process	extracellular;membrane	protein binding	Pf13895, Pf13927	284415	ENSG00000274953.4; ENSG00000276363.4; ENSG00000277607.4; ENSG00000274887.4; ENSG00000275962.4; ENSG00000275330.4; ENSG00000275577.4; ENSG00000189068.9; ENSG00000276159.4; ENSG00000276066.4	VSTM1	19; CHR_HSCHR19LRC_LRC_T_CTG3_1; CHR_HSCHR19LRC_LRC_J_CTG3_1; CHR_HSCHR19LRC_PGF2_CTG3_1; CHR_HSCHR19LRC_PGF1_CTG3_1; CHR_HSCHR19_4_CTG3_1; CHR_HSCHR19LRC_COX1_CTG3_1; CHR_HSCHR19LRC_COX2_CTG3_1; CHR_HSCHR19LRC_LRC_S_CTG3_1; CHR_HSCHR19LRC_LRC_I_CTG3_1				0		0					0	0				0	0	6.6338e+07	1.5433e+08	2.32642	1.21811
n/a	Medium	Master Protein	Q9UKJ1	Paired immunoglobulin-like type 2 receptor alpha [OS=Homo sapiens]		0.018	3	1	1	1	303	34	10.21	1.69	regulation of biological process;response to stimulus	extracellular;membrane	protein binding		29992	ENSG00000085514.15	PILRA	7		Herpes simplex infection	Immunoregulatory interactions between a Lymphoid and a non-Lymphoid cell	4		0					0	0				0	0	8.01993e+06	1.86247e+07	2.3223	1.21555
n/a	High	Master Protein	O00602	Ficolin-1 [OS=Homo sapiens]		0.009	3	1	3	1	326	35.1	6.86	2.01	defense response;metabolic process;regulation of biological process;response to stimulus;transport	extracellular;membrane;organelle lumen	catalytic activity;metal ion binding;protein binding;receptor activity;signal transducer activity	Pf00147, Pf01391	2219	ENSG00000085265.10	FCN1	9			Ficolins bind to repetitive carbohydrate structures on the target cell surface; Neutrophil degranulation	8		0					0	0				0	0	3.01976e+06	6.98877e+06	2.31434	1.2106
n/a	High	Master Protein	P01024	Complement C3 [OS=Homo sapiens]		0.002	3	4	8	4	1663	187	6.4	5.85	cell organization and biogenesis;defense response;metabolic process;regulation of biological process;response to stimulus;transport	extracellular;membrane;organelle lumen	catalytic activity;enzyme regulator activity;protein binding	Pf00207, Pf01759, Pf01821, Pf01835, Pf07677, Pf07678, Pf07703, Pf10569, Pf11974	718	ENSG00000125730.16	C3	19	Allograft Rejection; TYROBP Causal Network; Complement Activation; Complement and Coagulation Cascades	Viral carcinogenesis; Herpes simplex infection; Phagosome; Leishmaniasis; Legionellosis; Systemic lupus erythematosus; Pertussis; Chagas disease (American trypanosomiasis); Staphylococcus aureus infection; Complement and coagulation cascades; Tuberculosis	Post-translational protein phosphorylation; Regulation of Insulin-like Growth Factor (IGF) transport and uptake by Insulin-like Growth Factor Binding Proteins (IGFBPs); Alternative complement activation; Peptide ligand-binding receptors; Regulation of Complement cascade; Activation of C3 and C5; Neutrophil degranulation; Immunoregulatory interactions between a Lymphoid and a non-Lymphoid cell; G …	36	8.41	0.00118483					0	0				0	0	954249	2.1845e+06	2.28924	1.19487
n/a	High	Master Protein	P07858	Cathepsin B [OS=Homo sapiens]		0.007	2	1	3	1	339	37.8	6.3	3.32	cell differentiation;metabolic process;regulation of biological process;response to stimulus;transport	extracellular;mitochondrion;organelle lumen;vacuole	catalytic activity;protein binding	Pf00112, Pf08127	1508	ENSG00000164733.20	CTSB	8		NOD-like receptor signaling pathway; Apoptosis; Lysosome; Antigen processing and presentation; Renin secretion	Collagen degradation; Assembly of collagen fibrils and other multimeric structures; Neutrophil degranulation; MHC class II antigen presentation; Trafficking and processing of endosomal TLR	17		0					0	0				0	0	1.31479e+08	3.00643e+08	2.28662	1.19321
n/a	Medium	Master Protein	Q969H8	Myeloid-derived growth factor [OS=Homo sapiens]		0.021	9	2	2	2	173	18.8	6.68	1.66	cell death;regulation of biological process	extracellular;organelle lumen	protein binding	Pf10572	56005	ENSG00000074842.7	C19orf10; MYDGF	19			XBP1(S) activates chaperone genes	4		0					0	0				0	0	1.36971e+06	3.12754e+06	2.28336	1.19116
n/a	High	Master Protein	Q9UBX7-1	Isoform 1 of Kallikrein-11 [OS=Homo sapiens]		0.003	3	1	6	1	250	27.4	8.43	5.2	metabolic process	Golgi	catalytic activity	Pf00089	11012	ENSG00000167757.13	KLK11	19				0		0					0	0				0	0	2.10271e+06	4.78304e+06	2.27471	1.18568
n/a	Medium	Master Protein	Q14789	Golgin subfamily B member 1 [OS=Homo sapiens]		0.021	0	1	1	1	3259	375.8	5	0	cell organization and biogenesis;metabolic process;regulation of biological process;transport	Golgi;membrane	catalytic activity;DNA binding;motor activity;protein binding;RNA binding;transporter activity	Pf01496, Pf01576, Pf04111, Pf07888, Pf09726	2804	ENSG00000173230.15	GOLGB1	3			COPI-mediated anterograde transport; Golgi Associated Vesicle Biogenesis	11		0					0	0				0	0	1.08109e+07	2.44703e+07	2.26349	1.17855
n/a	High	Master Protein	O15389	Sialic acid-binding Ig-like lectin 5 [OS=Homo sapiens]		0.001	8	4	12	4	551	60.7	7.27	12.21	transport	membrane	protein binding	Pf00047, Pf07679, Pf08205, Pf13895	8778	ENSG00000105501.12; ENSG00000268500.5	SIGLEC5	19			Neutrophil degranulation; Immunoregulatory interactions between a Lymphoid and a non-Lymphoid cell	5	6.82	0.00104384					0	0				0	0	2.51011e+06	5.67285e+06	2.26	1.17632
n/a	High	Master Protein	P49019	Hydroxycarboxylic acid receptor 3 [OS=Homo sapiens]		0.001	3	1	6	1	387	44.4	8.78	8.88	regulation of biological process;response to stimulus	membrane	receptor activity;signal transducer activity	Pf00001	8843	ENSG00000255398.2	HCAR3	12	GPCRs, Class A Rhodopsin-like	cAMP signaling pathway	Hydroxycarboxylic acid-binding receptors; G alpha (i) signalling events	9	5.9	0.000956023					0	0				0	0	1.31486e+06	2.96323e+06	2.25366	1.17227
n/a	High	Master Protein	Q96D96-1	voltage-gated hydrogen channel 1 [OS=Homo sapiens]		0.005	5	1	4	1	273	31.7	6.8	4.54	regulation of biological process;response to stimulus;transport	membrane	protein binding;transporter activity		84329	ENSG00000122986.13	HVCN1	12			Sperm Motility And Taxes; Neutrophil degranulation	6	4.49	0.00084246					0	0				0	0	5.85533e+06	1.3171e+07	2.24939	1.16954
n/a	High	Master Protein	Q16563	Synaptophysin-like protein 1 [OS=Homo sapiens]		0.009	4	1	2	1	259	28.5	8.43	2.14	cell communication;transport	membrane	transporter activity	Pf01284	6856	ENSG00000008282.8	SYPL1	7				0	3.63	0.000774593					0	0				0	0	736947	1.64569e+06	2.23312	1.15906
n/a	High	Master Protein	Q9ULY5	C-type lectin domain family 4 member E [OS=Homo sapiens]		0.008	9	2	5	2	219	25.1	5.2	2.27	cell differentiation;defense response;regulation of biological process;response to stimulus	membrane	receptor activity	Pf00059	26253	ENSG00000166523.7	CLEC4E	12		Tuberculosis	Dectin-2 family	5	3.01	0.00144509					0	0				0	0	4.36399e+06	9.63466e+06	2.20777	1.14259
n/a	High	Master Protein	O96011-1	Peroxisomal membrane protein 11B [OS=Homo sapiens]		0.007	5	1	2	1	259	28.4	9.85	3	cell organization and biogenesis;regulation of biological process;response to stimulus	membrane	protein binding	Pf05648	8799	ENSG00000131779.10	LOC101060567; PEX11B	1		Peroxisome		1	1.86	0.0117429					0	0				0	0	1.32179e+06	2.89169e+06	2.18771	1.12942
n/a	High	Master Protein	Q9H3Z4	DnaJ homolog subfamily C member 5 [OS=Homo sapiens]		0.006	5	1	2	1	198	22.1	5.07	4.36	regulation of biological process;transport	membrane;mitochondrion	protein binding	Pf00226	80331	ENSG00000101152.10	DNAJC5	20		Protein processing in endoplasmic reticulum	Neutrophil degranulation; GABA synthesis, release, reuptake and degradation	8		0					0	0				0	0	7.70904e+07	1.67076e+08	2.16727	1.11588
n/a	Medium	Master Protein	O43169	Cytochrome b5 type B [OS=Homo sapiens]		0.02	4	1	1	1	146	16.3	4.97	0	metabolic process;transport	membrane;mitochondrion	metal ion binding;protein binding	Pf00173	80777	ENSG00000103018.16	CYB5B	16	Oxidation by Cytochrome P450		Phase I - Functionalization of compounds	4		0					0	0				0	0	1.21866e+06	2.63399e+06	2.16138	1.11195
n/a	High	Master Protein	O75964	ATP synthase subunit g, mitochondrial [OS=Homo sapiens]		0.001	11	1	8	1	103	11.4	9.64	10.22	cell organization and biogenesis;metabolic process;transport	membrane;mitochondrion	catalytic activity;transporter activity	Pf04718	10632	ENSG00000167283.7	ATP5L	11	Electron Transport Chain; Oxidative phosphorylation	Metabolic pathways; Oxidative phosphorylation	Cristae formation; Formation of ATP by chemiosmotic coupling	11	3.25	0.000745156					0	0				0	0	7.38906e+07	1.58294e+08	2.14227	1.09914
n/a	High	Master Protein	Q13011	Delta(3,5)-Delta(2,4)-dienoyl-CoA isomerase, mitochondrial [OS=Homo sapiens]		0.01	6	2	4	2	328	35.8	8	1.88	metabolic process	membrane;mitochondrion	catalytic activity;protein binding	Pf00378	1891	ENSG00000282853.1; ENSG00000104823.8	ECH1	19; CHR_HG26_PATCH	Fatty Acid Biosynthesis	Peroxisome		2	2.99	0.00143988					0	0				0	0	1.04936e+06	2.2329e+06	2.12787	1.08941
n/a	Medium	Master Protein	P56385	ATP synthase subunit e, mitochondrial [OS=Homo sapiens]		0.022	14	1	1	1	69	7.9	9.35	0	cell organization and biogenesis;metabolic process;transport	membrane;mitochondrion	catalytic activity;transporter activity	Pf05680	521	ENSG00000169020.9	ATP5I	4	Electron Transport Chain; Oxidative phosphorylation	Oxidative phosphorylation; Metabolic pathways	Cristae formation; Formation of ATP by chemiosmotic coupling	11		0					0	0				0	0	4.24782e+07	9.00992e+07	2.12107	1.08479
n/a	High	Master Protein	P48047	ATP synthase subunit O, mitochondrial [OS=Homo sapiens]		0.002	14	2	4	2	213	23.3	9.96	6.62	cell organization and biogenesis;metabolic process;transport	membrane;mitochondrion;nucleus	catalytic activity;protein binding;transporter activity	Pf00213	539	ENSG00000241837.6	ATP5O	21	Electron Transport Chain; Oxidative phosphorylation	Parkinson's disease; Metabolic pathways; Alzheimer's disease; Huntington's disease; Oxidative phosphorylation	Cristae formation; Formation of ATP by chemiosmotic coupling	14	10.07	0.00135135					0	0				0	0	4.6719e+07	9.87383e+07	2.11345	1.0796
n/a	High	Master Protein	P13073	Cytochrome c oxidase subunit 4 isoform 1, mitochondrial [OS=Homo sapiens]		0.007	12	2	6	2	169	19.6	9.51	2.4	metabolic process;response to stimulus;transport	membrane;mitochondrion;nucleus	catalytic activity;protein binding;transporter activity	Pf02936	1327	ENSG00000131143.8	COX4I1	16	Electron Transport Chain	Metabolic pathways; Huntington's disease; Oxidative phosphorylation; Parkinson's disease; Cardiac muscle contraction; Non-alcoholic fatty liver disease (NAFLD); Alzheimer's disease	TP53 Regulates Metabolic Genes; Respiratory electron transport	17	5.65	0.000931966					0	0				0	0	6.21974e+06	1.30758e+07	2.10231	1.07198
n/a	High	Master Protein	O76021	Ribosomal L1 domain-containing protein 1 [OS=Homo sapiens]		0.01	4	2	4	2	490	54.9	10.13	1.87	cell differentiation;metabolic process;regulation of biological process	membrane;nucleus	protein binding;RNA binding	Pf06030, Pf11797	26156	ENSG00000171490.12	RSL1D1	16	Senescence and Autophagy in Cancer			1	3.13	0.000734214					0	0				0	0	681462	1.43185e+06	2.10114	1.07117
n/a	High	Master Protein	P20138-1	Myeloid cell surface antigen CD33 [OS=Homo sapiens]		0.001	6	2	7	2	364	39.8	8.38	10.61	cell communication;regulation of biological process;response to stimulus;transport	membrane;nucleus	protein binding;receptor activity	Pf00047, Pf08205	945	ENSG00000105383.14	CD33	19		Hematopoietic cell lineage	Neutrophil degranulation; Immunoregulatory interactions between a Lymphoid and a non-Lymphoid cell	6	9.24	0.00127065					0	0				0	0	1.27126e+06	2.67047e+06	2.10064	1.07083
n/a	Medium	Master Protein	Q9UIJ7-1	GTP:AMP phosphotransferase AK3, mitochondrial [OS=Homo sapiens]		0.021	4	1	1	1	227	25.6	9.16	0	coagulation;metabolic process	mitochondrion;organelle lumen	catalytic activity;nucleotide binding;protein binding	Pf00406, Pf05191, Pf13207, Pf13238, Pf13671	50808	ENSG00000147853.16	AK3	9		Purine metabolism	Factors involved in megakaryocyte development and platelet production	3		0					0	0				0	0	3.3739e+06	7.00242e+06	2.07547	1.05344
n/a	High	Master Protein	P17031	zinc finger protein 26 [OS=Homo sapiens]		0.007	2	1	2	1	533	61.2	8.84	3.4	metabolic process;regulation of biological process	nucleus	DNA binding;metal ion binding;protein binding	Pf01352, Pf13465	7574	ENSG00000198393.7	ZNF26; LOC100287515	12			Generic Transcription Pathway	3		0					0	0				0	0	1.19536e+07	2.47721e+07	2.07235	1.05127
n/a	Medium	Master Protein	Q9BUJ2-1	Heterogeneous nuclear ribonucleoprotein U-like protein 1 [OS=Homo sapiens]		0.021	2	1	1	1	856	95.7	6.92	0	metabolic process;regulation of biological process;response to stimulus	nucleus	protein binding;RNA binding	Pf00622, Pf02037, Pf13671	11100	ENSG00000105323.16	HNRNPUL1	19		Influenza A	mRNA Splicing - Major Pathway	5		0					0	0				0	0	5.62032e+06	1.16272e+07	2.06878	1.04878
n/a	Medium	Master Protein	Q9BRP0-1	transcription factor Ovo-like 2 [OS=Homo sapiens]		0.017	3	1	1	1	275	30.4	8.75	1.73	cell differentiation;cellular component movement;development;metabolic process;regulation of biological process	nucleus	DNA binding;metal ion binding	Pf13465	58495	ENSG00000125850.10	OVOL2	20				0		0					0	0				0	0	3.57288e+07	7.39009e+07	2.06839	1.04851
n/a	High	Master Protein	P60709	Actin, cytoplasmic 1 [OS=Homo sapiens]		0	82	32	2423	5	375	41.7	5.48	1464.1	cell organization and biogenesis;cellular component movement;metabolic process;regulation of biological process;response to stimulus	cytoplasm;cytoskeleton;cytosol;membrane;nucleus	DNA binding;nucleotide binding;protein binding;structural molecule activity	Pf00022	60	ENSG00000075624.13	ACTB	7	Arrhythmogenic Right Ventricular Cardiomyopathy; Pathogenic Escherichia coli infection; Common Pathways Underlying Drug Addiction; Myometrial Relaxation and Contraction Pathways; Focal Adhesion; Fas Ligand (FasL) pathway and Stress induction of Heat Shock Proteins (HSP) regulation; Regulation of Actin Cytoskeleton	Oxytocin signaling pathway; Bacterial invasion of epithelial cells; Dilated cardiomyopathy; Regulation of actin cytoskeleton; Arrhythmogenic right ventricular cardiomyopathy (ARVC); Proteoglycans in cancer; Hypertrophic cardiomyopathy (HCM); Phagosome; Vibrio cholerae infection; Rap1 signaling pathway; Leukocyte transendothelial migration; Pathogenic Escherichia coli infection; Salmonella infecti…	Formation of annular gap junctions; Cell-extracellular matrix interactions; UCH proteinases; MAP2K and MAPK activation; Interaction between L1 and Ankyrins; Factors involved in megakaryocyte development and platelet production; Translocation of GLUT4 to the plasma membrane; EPH-ephrin mediated repulsion of cells; Prefoldin mediated transfer of substrate to CCT/TriC; EPHB-mediated forward signalin…	102	338.38	0	Acetyl [N-Term]	2.28542e+10	2.6352e+10	2.94927e+10	2.6233e+10	2.71147e+09	2.394e+10	3.44008e+10	3.34856e+10	3.06088e+10	4.73034e+09	7.94775e+07	1.63989e+08	2.06334	1.04498
n/a	High	Master Protein	Q13813	Spectrin alpha chain, non-erythrocytic 1 [OS=Homo sapiens]		0	56	145	1743	30	2472	284.4	5.35	1581.81	cell organization and biogenesis;cellular component movement;metabolic process;regulation of biological process;response to stimulus;transport	cytoplasm;cytoskeleton;cytosol;extracellular;membrane;organelle lumen	metal ion binding;protein binding;structural molecule activity	Pf00018, Pf00036, Pf00435, Pf07653, Pf08239, Pf08726, Pf13405, Pf13499, Pf14604	6709	ENSG00000197694.15	SPTAN1	9	Fas Ligand (FasL) pathway and Stress induction of Heat Shock Proteins (HSP) regulation	Apoptosis; Tight junction	Interaction between L1 and Ankyrins; Caspase-mediated cleavage of cytoskeletal proteins; NCAM signaling for neurite out-growth; Nephrin family interactions; Neutrophil degranulation; COPI-mediated anterograde transport; RAF/MAP kinase cascade; Interleukin-20 family signaling	33	705.55	0	Acetyl [N-Term]	5.36285e+09	6.72911e+09	6.80398e+09	6.29865e+09	6.62414e+08	5.73062e+09	8.70263e+09	9.01245e+09	7.81524e+09	1.47946e+09	6.15644e+06	1.26602e+07	2.05642	1.04014
n/a	High	Master Protein	P08670	Vimentin [OS=Homo sapiens]		0	75	45	946	43	466	53.6	5.12	660.5	cell differentiation;cell organization and biogenesis;cellular component movement;metabolic process;regulation of biological process;response to stimulus	cytoplasm;cytoskeleton;cytosol;membrane	protein binding;RNA binding;structural molecule activity	Pf00038, Pf04111, Pf04156, Pf04732, Pf05622, Pf10186	7431	ENSG00000026025.15	VIM	10	Allograft Rejection; Spinal Cord Injury; Primary Focal Segmental Glomerulosclerosis FSGS; Apoptosis-related network due to altered Notch3 in ovarian cancer; Striated Muscle Contraction; TGF-B Signaling in Thyroid Cells for Epithelial-Mesenchymal Transition; T-Cell antigen Receptor (TCR) Signaling Pathway	MicroRNAs in cancer; Epstein-Barr virus infection	Interleukin-4 and 13 signaling; Caspase-mediated cleavage of cytoskeletal proteins; Striated Muscle Contraction	20	238.94	0		4.54969e+09	3.6079e+09	5.53101e+09	4.56287e+09	7.85163e+08	7.29981e+09	1.07759e+10	9.50624e+09	9.19398e+09	1.43617e+09	2.43704e+06	4.96894e+06	2.03893	1.02781
n/a	High	Master Protein	Q01082-1	Spectrin beta chain, non-erythrocytic 1 [OS=Homo sapiens]		0	53	132	1441	36	2364	274.4	5.57	1087.96	cell organization and biogenesis;cellular component movement;metabolic process;regulation of biological process;response to stimulus;transport	cytoplasm;cytoskeleton;cytosol;membrane;nucleus	protein binding;RNA binding;structural molecule activity	Pf00169, Pf00307, Pf00435, Pf11971, Pf12128, Pf15410	6711	ENSG00000115306.15	SPTBN1	2	TGF-beta Signaling Pathway; Sudden Infant Death Syndrome (SIDS) Susceptibility Pathways		Nephrin family interactions; Interaction between L1 and Ankyrins; COPI-mediated anterograde transport; RAF/MAP kinase cascade; NCAM signaling for neurite out-growth; Interleukin-20 family signaling	25	644.03	0		3.30348e+09	3.53325e+09	4.06943e+09	3.63539e+09	3.20927e+08	4.10105e+09	6.09975e+09	6.10288e+09	5.43456e+09	9.42932e+08	2.4988e+06	5.06079e+06	2.02529	1.01813
n/a	High	Master Protein	Q99879	Histone H2B type 1-M [OS=Homo sapiens]		0	58	10	232	5	126	14	10.32	100.36	cell organization and biogenesis;metabolic process	chromosome;cytosol;nucleus	DNA binding;protein binding	Pf00125, Pf00808	8342	ENSG00000273703.1	HIST1H2BM	6		Systemic lupus erythematosus; Alcoholism; Viral carcinogenesis	SIRT1 negatively regulates rRNA expression; Nonhomologous End-Joining (NHEJ); Activation of anterior HOX genes in hindbrain development during early embryogenesis; NoRC negatively regulates rRNA expression; Meiotic synapsis; Transcriptional regulation by small RNAs; Meiotic recombination; PRC2 methylates histones and DNA; Recruitment and ATM-mediated phosphorylation of repair and signaling protei…	77	27.73	0		3.82869e+09	2.88906e+09	3.88666e+09	3.5348e+09	4.57223e+08	3.23984e+09	4.25603e+09	3.39738e+09	3.63108e+09	4.46562e+08	4.56287e+09	9.19398e+09	2.01496	1.01075
n/a	High	Master Protein	P68104	Elongation factor 1-alpha 1 [OS=Homo sapiens]		0	55	25	445	25	462	50.1	9.01	273.17	metabolic process;regulation of biological process;response to stimulus;transport	cytoplasm;cytoskeleton;cytosol;extracellular;membrane;nucleus;organelle lumen	catalytic activity;nucleotide binding;protein binding;RNA binding	Pf00009, Pf03143, Pf03144	1915	ENSG00000156508.17	EEF1A1	6	Translation Factors	RNA transport; Legionellosis	Peptide chain elongation; Protein methylation; Neutrophil degranulation; HSF1 activation	16	158.36	0		2.41041e+09	3.58291e+09	3.4082e+09	3.13384e+09	5.16488e+08	1.53548e+09	2.54194e+09	2.65313e+09	2.24351e+09	5.02711e+08	1.38394e+06	2.74589e+06	1.98412	0.988497
n/a	High	Master Protein	P35579-1	Myosin-9 [OS=Homo sapiens]		0	50	98	969	81	1960	226.4	5.6	883.19	cell differentiation;cell organization and biogenesis;cellular component movement;metabolic process;regulation of biological process;response to stimulus;transport	cytoplasm;cytoskeleton;cytosol;extracellular;membrane;nucleus	catalytic activity;motor activity;nucleotide binding;protein binding;RNA binding;transporter activity	Pf00063, Pf01442, Pf01496, Pf01576, Pf01765, Pf02736, Pf03962, Pf04111, Pf04156, Pf05911, Pf06637, Pf07888, Pf09731, Pf11068, Pf11559, Pf12128, Pf13094	4627	ENSG00000100345.20	MYH9	22	Primary Focal Segmental Glomerulosclerosis FSGS; VEGFA-VEGFR2 Signaling Pathway	Tight junction; Regulation of actin cytoskeleton; Salmonella infection	RHO GTPases activate PAKs; EPHA-mediated growth cone collapse; RHO GTPases Activate ROCKs; Sema4D induced cell migration and growth-cone collapse; Regulation of actin dynamics for phagocytic cup formation; RHO GTPases activate CIT; RHO GTPases activate PKNs	23	464.14	0		2.49705e+09	3.36303e+09	3.17646e+09	3.01218e+09	3.72132e+08	2.01806e+09	3.22133e+09	3.4282e+09	2.8892e+09	6.21747e+08	2.811e+08	5.56541e+08	1.97986	0.985402
n/a	High	Master Protein	P06396	Gelsolin [OS=Homo sapiens]		0	32	27	153	27	782	85.6	6.28	87.59	cell death;cell organization and biogenesis;metabolic process;regulation of biological process;response to stimulus;transport	cytoplasm;cytoskeleton;cytosol;extracellular;membrane;nucleus;organelle lumen	metal ion binding;protein binding	Pf00626	2934	ENSG00000148180.19	GSN	9	Regulation of Actin Cytoskeleton; Senescence and Autophagy in Cancer	Regulation of actin cytoskeleton; Fc gamma R-mediated phagocytosis; Viral carcinogenesis	Neutrophil degranulation; Caspase-mediated cleavage of cytoskeletal proteins; Amyloid fiber formation	15	85.68	0		2.09803e+09	3.49246e+09	3.1907e+09	2.92706e+09	5.9902e+08	1.73033e+09	2.99135e+09	3.30212e+09	2.6746e+09	6.79647e+08	2.31311e+06	4.56967e+06	1.97555	0.982258
n/a	High	Master Protein	O43707	Alpha-actinin-4 [OS=Homo sapiens]		0	51	51	660	36	911	104.8	5.44	453.72	cell organization and biogenesis;cellular component movement;regulation of biological process;response to stimulus;transport	cytoplasm;cytoskeleton;cytosol;extracellular;nucleus;organelle lumen	DNA binding;metal ion binding;protein binding;RNA binding	Pf00307, Pf00435, Pf08726, Pf11971, Pf13499	81	ENSG00000282844.1; ENSG00000130402.11	ACTN4	19; CHR_HG26_PATCH	Arrhythmogenic Right Ventricular Cardiomyopathy; Primary Focal Segmental Glomerulosclerosis FSGS; Striated Muscle Contraction	Arrhythmogenic right ventricular cardiomyopathy (ARVC); Leukocyte transendothelial migration; Focal adhesion; Amoebiasis; Regulation of actin cytoskeleton; Tight junction; Viral carcinogenesis; Systemic lupus erythematosus; Adherens junction	Platelet degranulation ; Nephrin family interactions	18	255.74	0		2.24611e+09	2.77762e+09	2.80169e+09	2.60847e+09	2.56417e+08	2.51421e+09	3.81644e+09	3.93183e+09	3.42083e+09	6.42806e+08	6.3611e+06	1.25434e+07	1.97189	0.979583
n/a	High	Master Protein	P21333-2	Isoform 2 of Filamin-A [OS=Homo sapiens]		0	45	105	1288	97	2639	279.8	6.05	1132.51	cell organization and biogenesis;cellular component movement;metabolic process;regulation of biological process;response to stimulus;transport	cytoplasm;cytoskeleton;cytosol;extracellular;membrane;nucleus	protein binding;RNA binding;signal transducer activity	Pf00307, Pf00630	2316	ENSG00000196924.14	FLNA	X	Androgen receptor signaling pathway; Prolactin Signaling Pathway; Focal Adhesion; Hypothesized Pathways in Pathogenesis of Cardiovascular Disease; MAPK Signaling Pathway; IL-4 Signaling Pathway			6	536.39	0		2.21097e+09	2.66558e+09	2.77978e+09	2.55211e+09	2.45687e+08	1.72475e+09	2.64674e+09	2.83833e+09	2.40327e+09	4.8612e+08	3.45992e+06	6.82024e+06	1.97121	0.979083
n/a	High	Master Protein	P43304	Glycerol-3-phosphate dehydrogenase, mitochondrial [OS=Homo sapiens]		0	13	9	63	9	727	80.8	7.69	30.91	metabolic process;transport	membrane;mitochondrion	catalytic activity;metal ion binding	Pf00036, Pf00890, Pf01266, Pf03486, Pf07992, Pf12831, Pf13499	2820	ENSG00000115159.15	GPD2	2	Fatty Acid Beta Oxidation	Glycerophospholipid metabolism	Triglyceride catabolism; Synthesis of PA	9	13.91	0		1.84219e+09	1.94908e+09	1.97789e+09	1.92305e+09	5.83756e+07	1.6783e+09	2.17056e+09	2.24718e+09	2.03201e+09	2.52062e+08	2.78286e+06	5.474e+06	1.96704	0.976026
n/a	High	Master Protein	Q15149-7	Isoform 7 of Plectin [OS=Homo sapiens]		0	25	122	1269	118	4515	512.3	5.77	1002.09	cell organization and biogenesis	cytoplasm;cytoskeleton;cytosol;membrane	protein binding;RNA binding;structural molecule activity	Pf00307, Pf00681, Pf07812	5339	ENSG00000178209.14	PLEC	8				0	446.99	0		1.52452e+09	1.92899e+09	1.86777e+09	1.77376e+09	1.78005e+08	1.74227e+09	2.54006e+09	2.68011e+09	2.32081e+09	4.13067e+08	1.42025e+06	2.78652e+06	1.96198	0.972313
n/a	High	Master Protein	P02545	Prelamin-A/C [OS=Homo sapiens]		0	55	44	485	43	664	74.1	7.02	398.39	cell organization and biogenesis;regulation of biological process;response to stimulus;transport	cytosol;membrane;nucleus	protein binding;structural molecule activity	Pf00038, Pf00932	4000	ENSG00000160789.19	LMNA	1	Arrhythmogenic Right Ventricular Cardiomyopathy; Adipogenesis; Fas Ligand (FasL) pathway and Stress induction of Heat Shock Proteins (HSP) regulation	Hypertrophic cardiomyopathy (HCM); Dilated cardiomyopathy; Apoptosis; Arrhythmogenic right ventricular cardiomyopathy (ARVC)	Signaling by BRAF and RAF fusions; Breakdown of the nuclear lamina; XBP1(S) activates chaperone genes; Initiation of Nuclear Envelope Reformation; Clearance of Nuclear Envelope Membranes from Chromatin; Depolymerisation of the Nuclear Lamina; Deregulated CDK5 triggers multiple neurodegenerative pathways in Alzheimer's disease models	33	161.66	0		1.4017e+09	1.73727e+09	1.84932e+09	1.66276e+09	1.90184e+08	1.26744e+09	2.02329e+09	2.10296e+09	1.7979e+09	3.76498e+08	5.50577e+06	1.07776e+07	1.95751	0.969022
n/a	High	Master Protein	Q93077	Histone H2A type 1-C [OS=Homo sapiens]		0	68	9	271	6	130	14.1	11.05	177.34	regulation of biological process	chromosome;nucleus	DNA binding;protein binding	Pf00125, Pf00808	8334	ENSG00000180573.9	HIST1H2AC	6		Alcoholism; Systemic lupus erythematosus	SIRT1 negatively regulates rRNA expression; UCH proteinases; RMTs methylate histone arginines; Activation of anterior HOX genes in hindbrain development during early embryogenesis; NoRC negatively regulates rRNA expression; Meiotic synapsis; Transcriptional regulation by small RNAs; Meiotic recombination; PRC2 methylates histones and DNA; HDACs deacetylate histones; Formation of the beta-catenin:…	66	43.37	0		1.21035e+09	1.68031e+09	1.68384e+09	1.52483e+09	2.22379e+08	9.41226e+08	1.6414e+09	1.56612e+09	1.38291e+09	3.13829e+08	8.16969e+08	1.59715e+09	1.95497	0.967149
n/a	High	Master Protein	P13591-1	Isoform 2 of Neural cell adhesion molecule 1 [OS=Homo sapiens]		0	17	17	135	17	848	93.3	4.87	138.6	cellular component movement;metabolic process;regulation of biological process;response to stimulus	cell surface;cytosol;membrane	protein binding;receptor activity	Pf00041, Pf00047, Pf07654, Pf07679, Pf08205, Pf13895, Pf13927	4684	ENSG00000149294.16	NCAM1	11	Brain-Derived Neurotrophic Factor (BDNF) signaling pathway; Cardiac Progenitor Differentiation			2	59.93	0		1.0387e+09	1.424e+09	1.32425e+09	1.26232e+09	1.63279e+08	5.96009e+08	9.07695e+08	9.90319e+08	8.31341e+08	1.6979e+08	2.28003e+07	4.44241e+07	1.9484	0.962292
n/a	High	Master Protein	P08238	Heat shock protein HSP 90-beta [OS=Homo sapiens]		0	48	36	511	20	724	83.2	5.03	365.68	cell organization and biogenesis;metabolic process;regulation of biological process;response to stimulus;transport	cell surface;cytoplasm;cytosol;extracellular;membrane;mitochondrion;nucleus;organelle lumen	enzyme regulator activity;nucleotide binding;protein binding;RNA binding	Pf00183, Pf02518, Pf13589	3326	ENSG00000096384.19	HSP90AB1	6	NRF2 pathway; Focal Adhesion-PI3K-Akt-mTOR-signaling pathway	NOD-like receptor signaling pathway; Antigen processing and presentation; Protein processing in endoplasmic reticulum; Progesterone-mediated oocyte maturation; PI3K-Akt signaling pathway; Prostate cancer; Estrogen signaling pathway; Pathways in cancer	Sema3A PAK dependent Axon repulsion; HSF1 activation; Attenuation phase; Neutrophil degranulation; Aryl hydrocarbon receptor signalling; Uptake and function of diphtheria toxin; Regulation of actin dynamics for phagocytic cup formation; The NLRP3 inflammasome; HSP90 chaperone cycle for steroid hormone receptors (SHR); The role of GTSE1 in G2/M progression after G2 checkpoint	42	191.94	0		1.00305e+09	1.36577e+09	1.35569e+09	1.2415e+09	1.68664e+08	6.02745e+08	1.06593e+09	1.11343e+09	9.27368e+08	2.30361e+08	3.94399e+06	7.67238e+06	1.94533	0.960017
n/a	High	Master Protein	P84243	histone H3.3 [OS=Homo sapiens]		0	32	8	145	8	136	15.3	11.27	20.72	cell differentiation;cell organization and biogenesis;cell proliferation;coagulation;metabolic process;regulation of biological process;response to stimulus	chromosome;extracellular;nucleus	DNA binding;protein binding	Pf00125, Pf15630	3020; 440926; 3021	ENSG00000132475.10; ENSG00000163041.9	H3F3A; H3F3AP4; H3F3B	1; 2; 17	Gastric Cancer Network 1; Histone Modifications	Systemic lupus erythematosus; Transcriptional misregulation in cancer; Alcoholism	SIRT1 negatively regulates rRNA expression; Activation of anterior HOX genes in hindbrain development during early embryogenesis; NoRC negatively regulates rRNA expression; Factors involved in megakaryocyte development and platelet production; Transcriptional regulation by small RNAs; Meiotic recombination; PRC2 methylates histones and DNA; Formation of the beta-catenin:TCF transactivating comple…	54	21.81	0		9.08555e+08	1.39444e+09	1.24861e+09	1.18387e+09	2.03577e+08	6.4565e+08	1.02681e+09	9.4917e+08	8.73877e+08	1.64464e+08	1.08882e+07	2.11757e+07	1.94483	0.959645
n/a	High	Master Protein	P07437	tubulin beta chain [OS=Homo sapiens]		0	66	23	615	4	444	49.6	4.89	400.1	cell division;cell organization and biogenesis;cellular component movement;defense response;regulation of biological process;response to stimulus;transport	cytoplasm;cytoskeleton;extracellular;membrane;nucleus;organelle lumen	catalytic activity;nucleotide binding;protein binding;structural molecule activity	Pf00091, Pf03953, Pf10644	203068	ENSG00000232575.10; ENSG00000196230.12; ENSG00000227739.10; ENSG00000224156.10; ENSG00000235067.10; ENSG00000229684.10; ENSG00000183311.16; ENSG00000232421.10	TUBB	6; CHR_HSCHR6_MHC_MANN_CTG1; CHR_HSCHR6_MHC_COX_CTG1; CHR_HSCHR6_MHC_APD_CTG1; CHR_HSCHR6_MHC_DBB_CTG1; CHR_HSCHR6_MHC_MCF_CTG1; CHR_HSCHR6_MHC_QBL_CTG1; CHR_HSCHR6_MHC_SSTO_CTG1	Pathogenic Escherichia coli infection; Parkin-Ubiquitin Proteasomal System pathway	Phagosome; Gap junction; Pathogenic Escherichia coli infection	Neutrophil degranulation; Regulation of PLK1 Activity at G2/M Transition; AURKA Activation by TPX2; Anchoring of the basal body to the plasma membrane; Recruitment of NuMA to mitotic centrosomes; Loss of Nlp from mitotic centrosomes; Recruitment of mitotic centrosome proteins and complexes	24	193.12	0		9.12028e+08	1.19543e+09	1.27104e+09	1.12617e+09	1.54532e+08	7.3333e+08	1.39618e+09	1.42764e+09	1.18572e+09	3.20144e+08	4.32006e+06	8.37428e+06	1.93846	0.954913
		Master Protein	Q8WZ42-12	Isoform 12 of Titin [OS=Homo sapiens]			2	68	210	68	35991	3992.1	6.39		cell organization and biogenesis;cellular component movement;metabolic process;regulation of biological process;response to stimulus;transport	chromosome;cytosol;extracellular	catalytic activity;metal ion binding;nucleotide binding;protein binding;structural molecule activity	Pf00041, Pf00047, Pf00069, Pf02818, Pf07679, Pf07686, Pf07714, Pf09042, Pf10446, Pf13895, Pf13927	7273		TTN	2	Striated Muscle Contraction			1	44.64	0		9.02273e+08	1.22787e+09	1.17116e+09	1.10043e+09	1.42021e+08	9.48447e+08	1.46078e+09	1.5285e+09	1.31258e+09	2.58958e+08	1.64229e+07	3.17742e+07	1.93475	0.952148
n/a	High	Master Protein	P05141	ADP/ATP translocase 2 [OS=Homo sapiens]		0	48	17	158	10	298	32.8	9.69	78.93	regulation of biological process;transport	membrane;mitochondrion;nucleus	protein binding;RNA binding;transporter activity	Pf00153	292	ENSG00000005022.5	SLC25A5	X	Electron Transport Chain	Calcium signaling pathway; HTLV-I infection; cGMP-PKG signaling pathway; Parkinson's disease; Huntington's disease	Vpr-mediated induction of apoptosis by mitochondrial outer membrane permeabilization; Regulation of insulin secretion	15	52.99	0		8.41945e+08	1.17516e+09	1.08912e+09	1.03541e+09	1.41236e+08	7.64048e+08	1.34121e+09	1.43857e+09	1.18128e+09	2.97691e+08	504325	972642	1.9286	0.947554
n/a	High	Master Protein	P11142-1	Heat shock cognate 71 kDa protein [OS=Homo sapiens]		0	47	28	424	20	646	70.9	5.52	355.13	cell communication;cell organization and biogenesis;metabolic process;regulation of biological process;response to stimulus;transport	cytoplasm;cytosol;endosome;extracellular;membrane;nucleus;organelle lumen;spliceosomal complex	catalytic activity;nucleotide binding;protein binding;RNA binding	Pf00012, Pf02463, Pf06723	3312	ENSG00000109971.13	HSPA8	11	Parkin-Ubiquitin Proteasomal System pathway; MAPK Signaling Pathway; Exercise-induced Circadian Regulation	Toxoplasmosis; Spliceosome; Endocytosis; Legionellosis; Measles; MAPK signaling pathway; Longevity regulating pathway - multiple species; Estrogen signaling pathway; Antigen processing and presentation; Influenza A; Protein processing in endoplasmic reticulum; Epstein-Barr virus infection	Protein methylation; Clathrin-mediated endocytosis; Regulation of HSF1-mediated heat shock response; Golgi Associated Vesicle Biogenesis; GABA synthesis, release, reuptake and degradation; Lysosome Vesicle Biogenesis; CHL1 interactions; AUF1 (hnRNP D0) binds and destabilizes mRNA; Attenuation phase; Neutrophil degranulation; mRNA Splicing - Major Pathway; Interleukin-4 and 13 signaling; HSP90 cha…	52	170.79	0		8.84472e+08	1.05079e+09	1.12811e+09	1.02112e+09	1.01651e+08	9.16685e+08	1.35906e+09	1.32334e+09	1.19969e+09	2.00649e+08	5.86549e+06	1.12585e+07	1.91944	0.940689
n/a	High	Master Protein	P13639	Elongation factor 2 [OS=Homo sapiens]		0	45	38	421	37	858	95.3	6.83	295.67	cell differentiation;cell proliferation;metabolic process;regulation of biological process;response to stimulus;transport	cytoplasm;cytosol;extracellular;membrane;nucleus;organelle lumen;ribosome	catalytic activity;nucleotide binding;protein binding;RNA binding	Pf00009, Pf00679, Pf03144, Pf03764, Pf14492	1938	ENSG00000167658.15	EEF2	19	Translation Factors; AMP-activated Protein Kinase (AMPK) Signaling; Brain-Derived Neurotrophic Factor (BDNF) signaling pathway	AMPK signaling pathway; Oxytocin signaling pathway	Peptide chain elongation; Protein methylation; Synthesis of diphthamide-EEF2; Neutrophil degranulation; Uptake and function of diphtheria toxin	20	134.78	0		8.4222e+08	9.67547e+08	1.165e+09	9.91587e+08	1.32864e+08	5.09229e+08	7.96316e+08	8.46777e+08	7.17441e+08	1.48662e+08	1.08961e+07	2.08429e+07	1.91287	0.93574
n/a	High	Master Protein	P68363	Tubulin alpha-1B chain [OS=Homo sapiens]		0	57	23	419	2	451	50.1	5.06	346.97	cell division;cell organization and biogenesis;response to stimulus;transport	cytoplasm;cytoskeleton;membrane	catalytic activity;nucleotide binding;protein binding;RNA binding;structural molecule activity	Pf00091, Pf03953	10376	ENSG00000123416.15	TUBA1B	12	Pathogenic Escherichia coli infection; Allograft Rejection; Parkin-Ubiquitin Proteasomal System pathway	Gap junction; Phagosome; Pathogenic Escherichia coli infection; Apoptosis	COPI-independent Golgi-to-ER retrograde traffic; COPI-dependent Golgi-to-ER retrograde traffic; Carboxyterminal post-translational modifications of tubulin; Recruitment of NuMA to mitotic centrosomes; Hedgehog 'off' state; Translocation of GLUT4 to the plasma membrane; Microtubule-dependent trafficking of connexons from Golgi to the plasma membrane; Separation of Sister Chromatids; COPI-mediated …	66	151.72	0		7.49114e+08	1.05177e+09	1.11779e+09	9.72893e+08	1.60515e+08	6.28385e+08	1.18475e+09	1.2726e+09	1.02858e+09	2.85241e+08	2.60557e+07	4.98087e+07	1.91163	0.9348
n/a	High	Master Protein	P62081	40S ribosomal protein S7 [OS=Homo sapiens]		0	60	12	157	12	194	22.1	10.1	48.43	cell organization and biogenesis;metabolic process;regulation of biological process;transport	cytoplasm;cytoskeleton;cytosol;membrane;nucleus;ribosome	protein binding;RNA binding;structural molecule activity	Pf01251	6201	ENSG00000171863.12	RPS7	2	Cytoplasmic Ribosomal Proteins	Ribosome	Peptide chain elongation; Eukaryotic Translation Termination; Viral mRNA Translation; Formation of the ternary complex, and subsequently, the 43S complex; L13a-mediated translational silencing of Ceruloplasmin expression; Selenocysteine synthesis; Nonsense Mediated Decay (NMD) independent of the Exon Junction Complex (EJC); Nonsense Mediated Decay (NMD) enhanced by the Exon Junction Complex (EJC)…	39	34.86	0		7.85306e+08	1.09001e+09	1.01965e+09	9.64989e+08	1.30262e+08	8.03153e+08	1.28355e+09	1.30043e+09	1.12904e+09	2.30543e+08	3.15514e+07	6.00145e+07	1.90212	0.927605
n/a	High	Master Protein	P12814-1	Alpha-actinin-1 [OS=Homo sapiens]		0	57	46	470	31	892	103	5.41	445.01	cell differentiation;cell organization and biogenesis;regulation of biological process;transport	cytoplasm;cytoskeleton;cytosol;extracellular;membrane;organelle lumen	metal ion binding;protein binding;RNA binding	Pf00036, Pf00307, Pf00435, Pf08726, Pf11971, Pf13405, Pf13499	87	ENSG00000072110.13	ACTN1	14	Arrhythmogenic Right Ventricular Cardiomyopathy; Focal Adhesion; Regulation of Actin Cytoskeleton	Systemic lupus erythematosus; Adherens junction; Arrhythmogenic right ventricular cardiomyopathy (ARVC); Leukocyte transendothelial migration; Focal adhesion; Amoebiasis; Regulation of actin cytoskeleton; Tight junction; Viral carcinogenesis	Platelet degranulation ; Nephrin family interactions; Regulation of cytoskeletal remodeling and cell spreading by IPP complex components; Syndecan interactions	24	116.88	0		8.35833e+08	7.35726e+08	9.55544e+08	8.42368e+08	8.98594e+07	9.13023e+08	1.39158e+09	1.28582e+09	1.19681e+09	2.05259e+08	5.04351e+07	9.56503e+07	1.8965	0.923341
n/a	High	Master Protein	P04264	Keratin, type II cytoskeletal 1 [OS=Homo sapiens]		0	68	52	1326	43	644	66	8.12	1172.96	cell death;defense response;metabolic process;regulation of biological process;response to stimulus;transport	cytoskeleton;cytosol;extracellular;membrane;nucleus	catalytic activity;motor activity;protein binding;receptor activity;structural molecule activity	Pf00038, Pf01576, Pf05103, Pf05957, Pf12128, Pf13166, Pf13514	3848	ENSG00000167768.4	KRT1	12	Corticotropin-releasing hormone signaling pathway		Formation of the cornified envelope; Neutrophil degranulation	7	392.31	0		6.74915e+08	9.1464e+08	8.643e+08	8.17952e+08	1.03209e+08	6.16329e+08	1.00314e+09	9.71259e+08	8.63578e+08	1.75315e+08	771498	1.45698e+06	1.88851	0.917246
n/a	High	Master Protein	P11021	78 kDa glucose-regulated protein [OS=Homo sapiens]		0	50	38	418	36	654	72.3	5.16	378.1	cell communication;cell death;cell differentiation;cell organization and biogenesis;metabolic process;regulation of biological process;response to stimulus;transport	cell surface;cytoplasm;endoplasmic reticulum;membrane;mitochondrion;nucleus;organelle lumen	catalytic activity;metal ion binding;nucleotide binding;protein binding	Pf00012, Pf01968, Pf06723	3309	ENSG00000044574.7	HSPA5	9	Parkin-Ubiquitin Proteasomal System pathway; Apoptosis-related network due to altered Notch3 in ovarian cancer; Photodynamic therapy-induced unfolded protein response; MAPK Signaling Pathway	Antigen processing and presentation; Protein export; Thyroid hormone synthesis; Prion diseases; Protein processing in endoplasmic reticulum	Platelet degranulation ; PERK regulates gene expression; ATF6 (ATF6-alpha) activates chaperone genes; Antigen Presentation: Folding, assembly and peptide loading of class I MHC; Regulation of HSF1-mediated heat shock response; IRE1alpha activates chaperones	27	142.62	0		6.45861e+08	9.28935e+08	8.76111e+08	8.16969e+08	1.22899e+08	1.13443e+09	1.7848e+09	1.87223e+09	1.59715e+09	3.29134e+08	2.7594e+06	5.20268e+06	1.88544	0.9149
n/a	High	Master Protein	P05023	Sodium/potassium-transporting ATPase subunit alpha-1 [OS=Homo sapiens]		0	31	30	328	21	1023	112.8	5.49	284.38	cell communication;cellular homeostasis;metabolic process;regulation of biological process;response to stimulus;transport	endoplasmic reticulum;endosome;Golgi;membrane	catalytic activity;metal ion binding;nucleotide binding;protein binding;transporter activity	Pf00122, Pf00689, Pf00690, Pf00702, Pf08282, Pf12710, Pf13246	476	ENSG00000163399.15	ATP1A1	1	Preimplantation Embryo	Protein digestion and absorption; Cardiac muscle contraction; Aldosterone-regulated sodium reabsorption; Thyroid hormone signaling pathway; cGMP-PKG signaling pathway; Gastric acid secretion; Thyroid hormone synthesis; cAMP signaling pathway; Insulin secretion; Salivary secretion; Proximal tubule bicarbonate reclamation; Carbohydrate digestion and absorption; Endocrine and other factor-regulated …	Ion homeostasis; Ion transport by P-type ATPases	24	113.71	0		6.8694e+08	8.53889e+08	8.83955e+08	8.08261e+08	8.66609e+07	3.89816e+08	6.18278e+08	6.62891e+08	5.56995e+08	1.19608e+08	2.77903e+06	5.23728e+06	1.88457	0.914239
n/a	High	Master Protein	Q6UVK1	Chondroitin sulfate proteoglycan 4 [OS=Homo sapiens]		0	7	22	217	22	2322	250.4	5.47	93.06	cell differentiation;cell proliferation;cellular component movement;development;metabolic process;regulation of biological process;response to stimulus	cell surface;extracellular;membrane;organelle lumen	protein binding;signal transducer activity	Pf00054, Pf02210	1464	ENSG00000173546.7	CSPG4	15	Spinal Cord Injury		A tetrasaccharide linker sequence is required for GAG synthesis; Dermatan sulfate biosynthesis; Defective CHSY1 causes TPBS; Defective B4GALT7 causes EDS, progeroid type; Defective B3GALT6 causes EDSP2 and SEMDJL1; CS/DS degradation; Defective CHST14 causes EDS, musculocontractural type; Defective CHST3 causes SEDCJD; Chondroitin sulfate biosynthesis; Defective B3GAT3 causes JDSSDHD	19	63.31	0		6.39176e+08	9.03832e+08	8.2453e+08	7.89179e+08	1.10899e+08	4.03552e+08	6.27228e+08	6.37862e+08	5.56214e+08	1.08036e+08	829817	1.55751e+06	1.87693	0.908374
n/a	High	Master Protein	P62805	histone H4 [OS=Homo sapiens]		0	67	16	213	16	103	11.4	11.36	135.03	cell organization and biogenesis;metabolic process;regulation of biological process;response to stimulus	chromosome;extracellular;membrane;nucleus	DNA binding;protein binding;RNA binding	Pf00125, Pf02969, Pf15630	8359; 8361; 8360; 8363; 8370; 554313; 8365; 8364; 121504; 8367; 8294; 8366; 8362; 8368	ENSG00000197061.4; ENSG00000275126.1; ENSG00000273542.1; ENSG00000197238.4; ENSG00000197837.3; ENSG00000276966.2; ENSG00000158406.4; ENSG00000270882.2; ENSG00000274618.1; ENSG00000278637.1; ENSG00000277157.1; ENSG00000278705.1; ENSG00000270276.2; ENSG00000276180.1	HIST1H4A; HIST1H4F; HIST1H4D; HIST1H4J; HIST2H4A; HIST2H4B; HIST1H4H; HIST1H4C; HIST4H4; HIST1H4E; HIST1H4I; HIST1H4B; HIST1H4K; HIST1H4L	6; 1; 12	Gastric Cancer Network 1; Histone Modifications; Type II interferon signaling (IFNG)	Viral carcinogenesis; Systemic lupus erythematosus; Alcoholism	SIRT1 negatively regulates rRNA expression; RMTs methylate histone arginines; Nonhomologous End-Joining (NHEJ); Activation of anterior HOX genes in hindbrain development during early embryogenesis; NoRC negatively regulates rRNA expression; Meiotic synapsis; Transcriptional regulation by small RNAs; Meiotic recombination; PRC2 methylates histones and DNA; Recruitment and ATM-mediated phosphorylat…	82	80.99	0		6.85734e+08	7.32962e+08	9.15322e+08	7.78006e+08	9.89929e+07	3.53493e+08	5.63998e+08	5.56676e+08	4.91389e+08	9.75529e+07	6.83877e+06	1.28224e+07	1.87495	0.906854
n/a	High	Master Protein	P33241	Lymphocyte-specific protein 1 [OS=Homo sapiens]		0	51	14	138	14	339	37.2	4.74	171.67	cellular component movement;defense response;regulation of biological process;response to stimulus	cytoskeleton;membrane	protein binding;signal transducer activity	Pf02029	4046	ENSG00000130592.15	LSP1	11		Tuberculosis		1	116.57	0		6.12815e+08	8.39512e+08	8.72939e+08	7.75089e+08	1.15554e+08	5.74159e+08	9.351e+08	9.75954e+08	8.28404e+08	1.8055e+08	1.5863e+07	2.95959e+07	1.86572	0.899729
n/a	High	Master Protein	P06753-2	Isoform 2 of Tropomyosin alpha-3 chain [OS=Homo sapiens]		0	74	30	332	8	248	29	4.78	196.43	cell organization and biogenesis;cellular component movement	cytoskeleton;cytosol	protein binding;structural molecule activity	Pf00261, Pf12718	7170	ENSG00000143549.19	TPM3	1	Striated Muscle Contraction			1	114.93	0	Acetyl [N-Term]	6.51504e+08	8.35321e+08	8.24552e+08	7.70459e+08	8.42287e+07	5.69321e+08	8.68906e+08	9.3359e+08	7.90606e+08	1.58685e+08	1.18605e+06	2.20632e+06	1.86023	0.895478
n/a	High	Master Protein	O00159-3	Isoform 3 of Unconventional myosin-Ic [OS=Homo sapiens]		0	32	32	289	31	1044	119.6	9.45	197.47	cell organization and biogenesis;regulation of biological process;response to stimulus;transport	cytoplasm;cytosol;membrane	catalytic activity;motor activity;nucleotide binding;protein binding	Pf00063, Pf06017	4641	ENSG00000197879.14	MYO1C	17	Insulin Signaling		B-WICH complex positively regulates rRNA expression	5	120.53	0		5.97607e+08	8.30977e+08	7.57714e+08	7.28766e+08	9.74469e+07	4.24831e+08	6.48751e+08	7.13428e+08	5.9567e+08	1.23654e+08	2.9644e+06	5.45115e+06	1.83887	0.878819
n/a	High	Master Protein	Q93008-3	Probable ubiquitin carboxyl-terminal hydrolase FAF-X [OS=Homo sapiens]		0	2	6	34	6	2570	292.1	5.8	27.83	cell division;cell growth;cellular component movement;metabolic process;regulation of biological process;response to stimulus	cytoplasm;cytosol;membrane	catalytic activity;protein binding	Pf00443, Pf09606, Pf13423	8239	ENSG00000124486.12	USP9X	X			Synthesis of active ubiquitin: roles of E1 and E2 enzymes; Ub-specific processing proteases; Amyloid fiber formation; Downregulation of SMAD2/3:SMAD4 transcriptional activity	15	7.21	0.00107875		4.70986e+08	7.87325e+08	7.83078e+08	6.80463e+08	1.48133e+08	4.45074e+08	7.74554e+08	8.00241e+08	6.7329e+08	1.61714e+08	2.23153e+08	4.10154e+08	1.838	0.878135
n/a	High	Master Protein	Biognosys|iRT-Kit_WR_fusion	Biognosys|iRT-Kit_WR_fusion		0	100	11	305	11	134	14.2	4.75	720.48												0		0	Acetyl [N-Term]	6.78866e+08	6.78866e+08	6.78866e+08	6.78866e+08	0	6.78866e+08	6.78866e+08	6.78866e+08	6.78866e+08	0	21004.7	38247.5	1.8209	0.864653
n/a	High	Master Protein	P62829	60S ribosomal protein L23 [OS=Homo sapiens]		0	39	6	92	6	140	14.9	10.51	28.15	cell organization and biogenesis;metabolic process;regulation of biological process;response to stimulus;transport	cytoplasm;cytosol;membrane;ribosome	protein binding;RNA binding;structural molecule activity	Pf00238	9349	ENSG00000125691.12	RPL23	17	Cytoplasmic Ribosomal Proteins	Ribosome	Peptide chain elongation; Eukaryotic Translation Termination; Viral mRNA Translation; L13a-mediated translational silencing of Ceruloplasmin expression; Nonsense Mediated Decay (NMD) independent of the Exon Junction Complex (EJC); Selenocysteine synthesis; Nonsense Mediated Decay (NMD) enhanced by the Exon Junction Complex (EJC); GTP hydrolysis and joining of the 60S ribosomal subunit; Major path…	34	22.06	0		5.34571e+08	7.68548e+08	6.96495e+08	6.66538e+08	9.78415e+07	2.86106e+08	6.37326e+08	7.30961e+08	5.51464e+08	1.91491e+08	706708	1.28638e+06	1.82025	0.864133
n/a	High	Master Protein	P62269	40S ribosomal protein S18 [OS=Homo sapiens]		0	55	15	179	15	152	17.7	10.99	81.54	cell organization and biogenesis;metabolic process;transport	cytoplasm;cytosol;membrane;nucleus;ribosome	protein binding;RNA binding;structural molecule activity	Pf00416	6222	ENSG00000223367.6; ENSG00000096150.9; ENSG00000235650.6; ENSG00000226225.6; ENSG00000231500.6	RPS18	6; CHR_HSCHR6_MHC_DBB_CTG1; CHR_HSCHR6_MHC_QBL_CTG1; CHR_HSCHR6_MHC_COX_CTG1; CHR_HSCHR6_MHC_MCF_CTG1	Cytoplasmic Ribosomal Proteins	Ribosome	Peptide chain elongation; Eukaryotic Translation Termination; Viral mRNA Translation; Formation of the ternary complex, and subsequently, the 43S complex; L13a-mediated translational silencing of Ceruloplasmin expression; Selenocysteine synthesis; Nonsense Mediated Decay (NMD) independent of the Exon Junction Complex (EJC); Nonsense Mediated Decay (NMD) enhanced by the Exon Junction Complex (EJC)…	38	40.65	0	Acetyl [N-Term]	5.77189e+08	7.23839e+08	6.92103e+08	6.64377e+08	6.29976e+07	5.1444e+08	8.10329e+08	8.47394e+08	7.24054e+08	1.4899e+08	1.2808e+06	2.33116e+06	1.82009	0.864007
n/a	High	Master Protein	Q02878	60S ribosomal protein L6 [OS=Homo sapiens]		0	36	20	197	20	288	32.7	10.58	99.55	cell organization and biogenesis;metabolic process;regulation of biological process;transport	cytosol;membrane;nucleus;ribosome	DNA binding;protein binding;RNA binding;structural molecule activity	Pf01159, Pf03868	6128	ENSG00000089009.15	RPL6	12	Cytoplasmic Ribosomal Proteins	Ribosome	Peptide chain elongation; Eukaryotic Translation Termination; Viral mRNA Translation; L13a-mediated translational silencing of Ceruloplasmin expression; Nonsense Mediated Decay (NMD) independent of the Exon Junction Complex (EJC); Selenocysteine synthesis; Nonsense Mediated Decay (NMD) enhanced by the Exon Junction Complex (EJC); GTP hydrolysis and joining of the 60S ribosomal subunit; Major path…	34	73.98	0		5.8099e+08	6.78977e+08	7.32753e+08	6.6424e+08	6.28272e+07	4.65725e+08	7.19459e+08	7.316e+08	6.38928e+08	1.22573e+08	672630	1.22404e+06	1.81978	0.863763
n/a	High	Master Protein	Q15365	Poly(RC)-binding protein 1 [OS=Homo sapiens]		0	23	7	128	5	356	37.5	7.09	91.4	metabolic process;regulation of biological process	cytoplasm;cytosol;membrane;nucleus	DNA binding;protein binding;RNA binding	Pf00013, Pf13014	5093	ENSG00000169564.6	PCBP1	2		Spliceosome	mRNA Splicing - Major Pathway	5	24.63	0		4.6863e+08	7.03628e+08	8.12339e+08	6.61533e+08	1.43441e+08	3.91122e+08	6.93688e+08	7.52352e+08	6.12388e+08	1.58281e+08	3.20485e+06	5.82085e+06	1.81626	0.860973
n/a	High	Master Protein	P06733-1	alpha-enolase [OS=Homo sapiens]		0	59	25	308	21	434	47.1	7.39	272.54	metabolic process;regulation of biological process;response to stimulus	cell surface;cytoplasm;cytosol;membrane;nucleus	catalytic activity;DNA binding;metal ion binding;protein binding;RNA binding	Pf00113, Pf03952, Pf13378	2023	ENSG00000074800.13	ENO1	1	Glycolysis and Gluconeogenesis	Biosynthesis of amino acids; Carbon metabolism; Metabolic pathways; Glycolysis / Gluconeogenesis; RNA degradation; HIF-1 signaling pathway	Gluconeogenesis; Glycolysis	12	134.99	0		4.95345e+08	6.74882e+08	7.1359e+08	6.27939e+08	9.50805e+07	4.92262e+08	8.64353e+08	9.46783e+08	7.67799e+08	1.97719e+08	35622.6	64516.3	1.8111	0.85687
n/a	High	Master Protein	Q99623	Prohibitin-2 [OS=Homo sapiens]		0	30	9	128	9	299	33.3	9.83	75.58	cell organization and biogenesis;metabolic process;regulation of biological process;response to stimulus;transport	cell surface;cytoplasm;membrane;mitochondrion;nucleus	protein binding	Pf01145	11331	ENSG00000215021.8	PHB2	12			Processing of SMDT1	3	31.7	0		4.41035e+08	6.5983e+08	6.47736e+08	5.82867e+08	1.00412e+08	4.42637e+08	6.53057e+08	6.88615e+08	5.9477e+08	1.08549e+08	7.57806e+07	1.36913e+08	1.8067	0.853357
n/a	High	Master Protein	Q16643	drebrin [OS=Homo sapiens]		0	27	19	177	19	649	71.4	4.45	76.74	cell communication;cell differentiation;cell organization and biogenesis;cell proliferation;development;regulation of biological process	cytoplasm;cytoskeleton;membrane	protein binding	Pf00241	1627	ENSG00000113758.13	DBN1	5				0	71.16	0	Acetyl [N-Term]	5.2435e+08	5.33305e+08	6.27313e+08	5.61656e+08	4.65706e+07	5.73502e+08	8.54336e+08	8.12441e+08	7.4676e+08	1.237e+08	2.95564e+06	5.31713e+06	1.79898	0.847178
n/a	High	Master Protein	P47756-2	Isoform 2 of F-actin-capping protein subunit beta [OS=Homo sapiens]		0	61	19	367	19	272	30.6	6	267.76	cell organization and biogenesis;cellular component movement;coagulation;regulation of biological process;transport	cytoplasm;cytoskeleton;cytosol	protein binding	Pf01115	832	ENSG00000077549.17	CAPZB	1				0	108.2	0	Acetyl [N-Term]	4.48467e+08	6.40395e+08	5.89296e+08	5.59386e+08	8.11583e+07	3.94283e+08	6.25976e+08	6.67551e+08	5.62603e+08	1.20224e+08	228801	411577	1.79884	0.847069
n/a	High	Master Protein	P62917	60S ribosomal protein L8 [OS=Homo sapiens]		0	28	11	163	11	257	28	11.03	77.68	cell organization and biogenesis;metabolic process;response to stimulus;transport	cytoplasm;cytosol;membrane;ribosome	RNA binding;structural molecule activity	Pf00181, Pf03947	6132	ENSG00000161016.17	RPL8	8	Cytoplasmic Ribosomal Proteins	Ribosome	Peptide chain elongation; Eukaryotic Translation Termination; Viral mRNA Translation; L13a-mediated translational silencing of Ceruloplasmin expression; Nonsense Mediated Decay (NMD) independent of the Exon Junction Complex (EJC); Selenocysteine synthesis; Nonsense Mediated Decay (NMD) enhanced by the Exon Junction Complex (EJC); GTP hydrolysis and joining of the 60S ribosomal subunit; Major path…	34	45.07	0		4.31584e+08	6.20742e+08	5.87813e+08	5.46713e+08	8.2511e+07	3.94383e+08	6.73778e+08	6.57228e+08	5.7513e+08	1.27986e+08	2.63948e+06	4.74187e+06	1.79652	0.845206
n/a	High	Master Protein	Q96C19	EF-hand domain-containing protein D2 [OS=Homo sapiens]		0	48	17	221	17	240	26.7	5.2	178.38		membrane	metal ion binding;protein binding		79180	ENSG00000142634.12	EFHD2	1				0	77.38	0		4.467e+08	5.78584e+08	5.99748e+08	5.41677e+08	6.77127e+07	4.72479e+08	7.99089e+08	8.29699e+08	7.00422e+08	1.61664e+08	1.31891e+07	2.36526e+07	1.79335	0.842655
n/a	High	Master Protein	P62424	60S ribosomal protein L7a [OS=Homo sapiens]		0	42	14	174	14	266	30	10.61	77.13	cell organization and biogenesis;metabolic process;transport	cytoplasm;cytosol;membrane;nucleus;ribosome	protein binding;RNA binding;structural molecule activity	Pf01248	6130	ENSG00000280858.2; ENSG00000148303.16	RPL7A	9; CHR_HG2030_PATCH	Cytoplasmic Ribosomal Proteins	Ribosome	Peptide chain elongation; Eukaryotic Translation Termination; Viral mRNA Translation; L13a-mediated translational silencing of Ceruloplasmin expression; Nonsense Mediated Decay (NMD) independent of the Exon Junction Complex (EJC); Selenocysteine synthesis; Nonsense Mediated Decay (NMD) enhanced by the Exon Junction Complex (EJC); GTP hydrolysis and joining of the 60S ribosomal subunit; Major path…	34	50.33	0		4.09449e+08	6.29452e+08	5.61648e+08	5.33517e+08	9.19924e+07	3.27537e+08	5.78354e+08	5.94367e+08	5.00086e+08	1.22186e+08	3.41105e+06	6.10729e+06	1.79044	0.840315
n/a	High	Master Protein	P61313-1	60S ribosomal protein L15 [OS=Homo sapiens]		0	40	13	199	13	204	24.1	11.62	125.84	cell organization and biogenesis;metabolic process;response to stimulus;transport	cytosol;membrane;nucleus;ribosome	protein binding;RNA binding;structural molecule activity	Pf00827	6138	ENSG00000174748.18	RPL15	3	Cytoplasmic Ribosomal Proteins	Ribosome	Peptide chain elongation; Eukaryotic Translation Termination; Viral mRNA Translation; L13a-mediated translational silencing of Ceruloplasmin expression; Nonsense Mediated Decay (NMD) independent of the Exon Junction Complex (EJC); Selenocysteine synthesis; Nonsense Mediated Decay (NMD) enhanced by the Exon Junction Complex (EJC); GTP hydrolysis and joining of the 60S ribosomal subunit; Major path…	34	55.52	0		5.39345e+08	5.06239e+08	5.4043e+08	5.28671e+08	1.58681e+07	3.15071e+08	4.76647e+08	4.7353e+08	4.2175e+08	7.54437e+07	6.8398e+06	1.21941e+07	1.78282	0.83416
n/a	High	Master Protein	P84098	60S ribosomal protein L19 [OS=Homo sapiens]		0	31	9	62	9	196	23.5	11.47	23.8	cell organization and biogenesis;metabolic process;transport	cytosol;membrane;ribosome	protein binding;RNA binding;structural molecule activity	Pf01280	6143	ENSG00000108298.9	RPL19	17	Cytoplasmic Ribosomal Proteins	Ribosome	Peptide chain elongation; Eukaryotic Translation Termination; Viral mRNA Translation; L13a-mediated translational silencing of Ceruloplasmin expression; Nonsense Mediated Decay (NMD) independent of the Exon Junction Complex (EJC); Selenocysteine synthesis; Nonsense Mediated Decay (NMD) enhanced by the Exon Junction Complex (EJC); GTP hydrolysis and joining of the 60S ribosomal subunit; Major path…	34	18.37	0		4.20709e+08	6.00215e+08	5.18164e+08	5.1303e+08	7.33729e+07	3.01659e+08	4.86433e+08	5.09004e+08	4.32365e+08	9.28817e+07	1.73358e+07	3.08976e+07	1.7823	0.833739
n/a	High	Master Protein	P16403	Histone H1.2 [OS=Homo sapiens]		0	24	6	76	5	213	21.4	10.93	42.53	cell organization and biogenesis;metabolic process;regulation of biological process	chromosome;nucleus	DNA binding;protein binding;RNA binding	Pf00538	3006	ENSG00000187837.3	HIST1H1C	6			Formation of Senescence-Associated Heterochromatin Foci (SAHF); Activation of DNA fragmentation factor	10	23.7	0	Acetyl [N-Term]	3.89246e+08	6.17476e+08	5.16721e+08	5.07814e+08	9.33872e+07	2.3051e+08	3.62836e+08	4.01375e+08	3.31574e+08	7.31741e+07	3.43369e+07	6.11484e+07	1.78084	0.832555
n/a	High	Master Protein	Q9Y490	Talin-1 [OS=Homo sapiens]		0	28	60	415	60	2541	269.6	6.07	363.57	cell organization and biogenesis;cellular component movement;regulation of biological process;response to stimulus;transport	cell surface;cytoplasm;cytoskeleton;cytosol;extracellular;membrane	protein binding;structural molecule activity	Pf00373, Pf01608, Pf02174, Pf08913, Pf09141, Pf09379	7094	ENSG00000137076.20	TLN1	9	Integrin-mediated Cell Adhesion; Primary Focal Segmental Glomerulosclerosis FSGS; Focal Adhesion	Focal adhesion; Rap1 signaling pathway; Platelet activation; HTLV-I infection	SEMA3A-Plexin repulsion signaling by inhibiting Integrin adhesion; Signaling by BRAF and RAF fusions; MAP2K and MAPK activation; Smooth Muscle Contraction; XBP1(S) activates chaperone genes; GRB2:SOS provides linkage to MAPK signaling for Integrins ; Signaling by RAS mutants; Signaling by high-kinase activity BRAF mutants; Signaling by moderate kinase activity BRAF mutants; p130Cas linkage to MAP…	43	171.51	0		4.74426e+08	4.74327e+08	5.68765e+08	5.05839e+08	4.44948e+07	2.47624e+08	3.31334e+08	3.25121e+08	3.0136e+08	3.80816e+07	2.27346e+06	4.03106e+06	1.7731	0.82627
n/a	High	Master Protein	P14618	Pyruvate kinase PKM [OS=Homo sapiens]		0	74	34	373	34	531	57.9	7.84	282.32	cell death;cell organization and biogenesis;metabolic process;response to stimulus;transport	cytoplasm;cytosol;extracellular;mitochondrion;nucleus;organelle lumen	catalytic activity;metal ion binding;nucleotide binding;protein binding;RNA binding	Pf00224, Pf02887	5315	ENSG00000067225.17	PKM	15	Photodynamic therapy-induced HIF-1 survival signaling; Amino Acid metabolism; Glycolysis and Gluconeogenesis	Carbon metabolism; Glycolysis / Gluconeogenesis; Pyruvate metabolism; Central carbon metabolism in cancer; Metabolic pathways; Glucagon signaling pathway; Purine metabolism; Viral carcinogenesis; Biosynthesis of amino acids; Type II diabetes mellitus	Glycolysis; Neutrophil degranulation	20	192.95	0		3.96188e+08	5.60129e+08	5.56416e+08	5.04244e+08	7.64224e+07	2.26078e+08	3.7698e+08	3.89609e+08	3.30889e+08	7.42917e+07	78138.4	138280	1.76968	0.823485
n/a	High	Master Protein	Q06830	peroxiredoxin-1 [OS=Homo sapiens]		0	57	14	178	12	199	22.1	8.13	118.63	cell proliferation;cellular homeostasis;defense response;metabolic process;regulation of biological process;response to stimulus	cytoplasm;cytosol;mitochondrion;nucleus	antioxidant activity;catalytic activity;protein binding;RNA binding	Pf00578, Pf08534, Pf10417	5052	ENSG00000117450.13	PRDX1	1	Androgen receptor signaling pathway; Selenium Micronutrient Network; NRF2 pathway	Peroxisome	TP53 Regulates Metabolic Genes; Deregulated CDK5 triggers multiple neurodegenerative pathways in Alzheimer's disease models; Detoxification of Reactive Oxygen Species	15	56.03	0		3.75999e+08	5.44643e+08	5.60148e+08	4.93597e+08	8.33948e+07	3.61897e+08	6.20703e+08	5.88637e+08	5.23746e+08	1.15191e+08	2.81116e+06	4.94e+06	1.75728	0.813346
n/a	High	Master Protein	P14625	Endoplasmin [OS=Homo sapiens]		0	38	31	254	30	803	92.4	4.84	132.09	cell organization and biogenesis;metabolic process;regulation of biological process;response to stimulus;transport	cytosol;endoplasmic reticulum;extracellular;membrane;nucleus;organelle lumen	metal ion binding;nucleotide binding;protein binding;RNA binding	Pf00183, Pf02518, Pf13589	7184	ENSG00000166598.14	HSP90B1	12	Photodynamic therapy-induced unfolded protein response; Focal Adhesion-PI3K-Akt-mTOR-signaling pathway; Sudden Infant Death Syndrome (SIDS) Susceptibility Pathways	PI3K-Akt signaling pathway; Protein processing in endoplasmic reticulum; Estrogen signaling pathway; Prostate cancer; Thyroid hormone synthesis; Pathways in cancer	Post-translational protein phosphorylation; Regulation of Insulin-like Growth Factor (IGF) transport and uptake by Insulin-like Growth Factor Binding Proteins (IGFBPs); ATF6 (ATF6-alpha) activates chaperone genes; Interleukin-4 and 13 signaling; Trafficking and processing of endosomal TLR; Scavenging by Class A Receptors	26	79.16	0		3.94778e+08	5.34295e+08	5.51047e+08	4.93373e+08	7.00522e+07	5.73296e+08	8.93249e+08	9.19243e+08	7.95263e+08	1.57313e+08	5.30029e+07	9.30262e+07	1.75512	0.811566
n/a	High	Master Protein	P25705-1	ATP synthase subunit alpha, mitochondrial [OS=Homo sapiens]		0	41	19	151	19	553	59.7	9.13	128.19	cell organization and biogenesis;metabolic process;regulation of biological process;transport	membrane;mitochondrion;organelle lumen	catalytic activity;nucleotide binding;protein binding;RNA binding;transporter activity	Pf00006, Pf00306, Pf02663, Pf02874, Pf05943	498	ENSG00000152234.15	ATP5A1	18	Electron Transport Chain; Oxidative phosphorylation	Metabolic pathways; Parkinson's disease; Alzheimer's disease; Oxidative phosphorylation; Huntington's disease	Cristae formation; Mitochondrial protein import; Formation of ATP by chemiosmotic coupling; Metabolism of proteins	16	67.47	0		4.00822e+08	5.43076e+08	5.31554e+08	4.91817e+08	6.45149e+07	4.87037e+08	8.16322e+08	8.41745e+08	7.15035e+08	1.61553e+08	1.16726e+07	2.04145e+07	1.74893	0.80647
n/a	High	Master Protein	P39023	60S ribosomal protein L3 [OS=Homo sapiens]		0	40	19	139	19	403	46.1	10.18	89.21	cell organization and biogenesis;metabolic process;response to stimulus;transport	cytoplasm;cytosol;nucleus;ribosome	protein binding;RNA binding;structural molecule activity	Pf00297	6122	ENSG00000100316.15	RPL3	22	Cytoplasmic Ribosomal Proteins	Ribosome	Peptide chain elongation; Eukaryotic Translation Termination; Viral mRNA Translation; L13a-mediated translational silencing of Ceruloplasmin expression; Nonsense Mediated Decay (NMD) independent of the Exon Junction Complex (EJC); Selenocysteine synthesis; Nonsense Mediated Decay (NMD) enhanced by the Exon Junction Complex (EJC); GTP hydrolysis and joining of the 60S ribosomal subunit; Major path…	34	57.09	0		4.3191e+08	5.12201e+08	5.18794e+08	4.87635e+08	3.94955e+07	3.37484e+08	5.07724e+08	5.04666e+08	4.49958e+08	7.95412e+07	169441	295685	1.74506	0.803273
n/a	High	Master Protein	P04075	fructose-bisphosphate aldolase A [OS=Homo sapiens]		0	68	22	205	22	364	39.4	8.09	125.28	cell organization and biogenesis;cellular homeostasis;metabolic process;regulation of biological process;transport	cytoplasm;cytoskeleton;cytosol;extracellular;membrane;nucleus;organelle lumen	catalytic activity;protein binding;RNA binding	Pf00274	226	ENSG00000149925.17	ALDOA	16	Glycolysis and Gluconeogenesis; Sudden Infant Death Syndrome (SIDS) Susceptibility Pathways	Carbon metabolism; Metabolic pathways; Pentose phosphate pathway; HIF-1 signaling pathway; Glycolysis / Gluconeogenesis; Biosynthesis of amino acids; Fructose and mannose metabolism	Platelet degranulation ; Gluconeogenesis; Glycolysis; Neutrophil degranulation	21	87.7	0		3.87426e+08	5.61656e+08	4.78139e+08	4.7574e+08	7.11491e+07	2.24493e+08	3.21623e+08	3.47243e+08	2.97786e+08	5.28708e+07	1.57845e+06	2.74829e+06	1.74114	0.800029
n/a	High	Master Protein	P40227-1	T-complex protein 1 subunit zeta [OS=Homo sapiens]		0	22	11	148	11	531	58	6.68	78.94	metabolic process;regulation of biological process	cytoplasm;cytosol;membrane	nucleotide binding;protein binding;RNA binding	Pf00118, Pf05504	908	ENSG00000146731.10	CCT6A	7			Prefoldin mediated transfer of substrate to CCT/TriC; Cooperation of PDCL (PhLP1) and TRiC/CCT in G-protein beta folding; Association of TriC/CCT with target proteins during biosynthesis; Formation of tubulin folding intermediates by CCT/TriC; Folding of actin by CCT/TriC	9	41.7	0		4.00537e+08	5.22352e+08	4.99723e+08	4.74204e+08	5.29034e+07	2.09958e+08	3.24361e+08	3.31205e+08	2.88508e+08	5.56135e+07	1.83781e+06	3.19703e+06	1.73958	0.798739
n/a	High	Master Protein	P60174-1	Isoform 2 of Triosephosphate isomerase [OS=Homo sapiens]		0	51	12	164	12	249	26.7	6.9	136.65	development;metabolic process	cytosol;nucleus	catalytic activity;protein binding	Pf00121	7167	ENSG00000111669.14	TPI1	12	Fatty Acid Beta Oxidation; Cori Cycle; Glycolysis and Gluconeogenesis			3	49.77	0		4.20325e+08	5.20412e+08	4.67328e+08	4.69355e+08	4.08852e+07	9.40775e+07	1.3979e+08	1.39804e+08	1.24557e+08	2.15523e+07	7.64879e+06	1.3285e+07	1.73688	0.796495
n/a	High	Master Protein	P46940	Ras GTPase-activating-like protein IQGAP1 [OS=Homo sapiens]		0	29	42	275	42	1657	189.1	6.48	219.09	cell growth;regulation of biological process;response to stimulus;transport	cytoplasm;cytoskeleton;cytosol;membrane;nucleus	enzyme regulator activity;metal ion binding;protein binding	Pf00307, Pf00397, Pf00616, Pf03836, Pf11016	8826	ENSG00000140575.12	IQGAP1	15	VEGFA-VEGFR2 Signaling Pathway; EGF/EGFR Signaling Pathway; Regulation of Actin Cytoskeleton; G13 Signaling Pathway	Adherens junction; Proteoglycans in cancer; Regulation of actin cytoskeleton	Signaling by BRAF and RAF fusions; MAP2K and MAPK activation; RHO GTPases activate IQGAPs; Glucagon-like Peptide-1 (GLP1) regulates insulin secretion; Signaling by RAS mutants; Signaling by high-kinase activity BRAF mutants; Signaling by moderate kinase activity BRAF mutants; Nephrin family interactions; Paradoxical activation of RAF signaling by kinase inactive BRAF; Neutrophil degranulation; In…	35	129.83	0		3.75647e+08	4.85673e+08	5.17754e+08	4.59692e+08	6.08544e+07	2.39041e+08	3.85643e+08	3.96192e+08	3.40292e+08	7.17246e+07	708924	1.23016e+06	1.73525	0.795145
n/a	High	Master Protein	O75369-1	Filamin-B [OS=Homo sapiens]		0	24	51	370	44	2602	278	5.73	265.26	cell differentiation;cell organization and biogenesis;development;regulation of biological process;response to stimulus	cytoplasm;cytoskeleton;cytosol;membrane;nucleus	protein binding;RNA binding	Pf00307, Pf00630	2317	ENSG00000136068.14	FLNB	3	VEGFA-VEGFR2 Signaling Pathway	Proteoglycans in cancer; MAPK signaling pathway; Salmonella infection; Focal adhesion	ISG15 antiviral mechanism	10	135.62	0		3.89896e+08	4.87796e+08	4.8439e+08	4.54027e+08	4.53688e+07	3.04715e+08	5.03112e+08	4.98505e+08	4.35444e+08	9.24586e+07	2.03853e+07	3.52813e+07	1.73072	0.791373
n/a	High	Master Protein	Q09666-1	Neuroblast differentiation-associated protein AHNAK [OS=Homo sapiens]		0	13	30	205	30	5890	628.7	6.15	156.94	cell organization and biogenesis;regulation of biological process	cytoplasm;cytoskeleton;cytosol;membrane;nucleus	protein binding;RNA binding;structural molecule activity		79026	ENSG00000124942.13	AHNAK	11				0	83.09	0		3.48623e+08	5.17395e+08	4.86243e+08	4.50754e+08	7.33283e+07	2.12206e+08	3.84959e+08	4.23166e+08	3.4011e+08	9.17769e+07	1.98166e+08	3.42529e+08	1.7285	0.789518
n/a	High	Master Protein	P62701	40S ribosomal protein S4, X isoform [OS=Homo sapiens]		0	60	18	194	18	263	29.6	10.15	136.84	cell organization and biogenesis;development;metabolic process;regulation of biological process;transport	cytoplasm;cytosol;membrane;ribosome	protein binding;RNA binding;structural molecule activity	Pf00900, Pf08071	6191	ENSG00000198034.10	RPS4X	X	Cytoplasmic Ribosomal Proteins	Ribosome	Peptide chain elongation; Eukaryotic Translation Termination; Viral mRNA Translation; Formation of the ternary complex, and subsequently, the 43S complex; L13a-mediated translational silencing of Ceruloplasmin expression; Selenocysteine synthesis; Nonsense Mediated Decay (NMD) independent of the Exon Junction Complex (EJC); Nonsense Mediated Decay (NMD) enhanced by the Exon Junction Complex (EJC)…	38	74.88	0		3.61459e+08	4.93161e+08	4.89924e+08	4.48181e+08	6.13363e+07	2.6308e+08	4.21329e+08	4.29471e+08	3.71294e+08	7.65904e+07	896020	1.54807e+06	1.72772	0.788868
n/a	High	Master Protein	P15880	40S ribosomal protein S2 [OS=Homo sapiens]		0	55	18	154	18	293	31.3	10.24	61.14	cell organization and biogenesis;metabolic process;regulation of biological process;transport	cytosol;membrane;nucleus;ribosome	protein binding;RNA binding;structural molecule activity	Pf00333, Pf03719	6187	ENSG00000140988.15	RPS2	16	Cytoplasmic Ribosomal Proteins	Ribosome	Peptide chain elongation; Protein methylation; Eukaryotic Translation Termination; Viral mRNA Translation; RMTs methylate histone arginines; Formation of the ternary complex, and subsequently, the 43S complex; L13a-mediated translational silencing of Ceruloplasmin expression; Selenocysteine synthesis; Nonsense Mediated Decay (NMD) independent of the Exon Junction Complex (EJC); Nonsense Mediated …	44	54.41	0		3.69556e+08	4.6408e+08	4.9872e+08	4.44119e+08	5.45878e+07	2.98506e+08	4.86704e+08	4.79758e+08	4.21656e+08	8.71266e+07	5.96585e+06	1.02762e+07	1.7225	0.784506
n/a	High	Master Protein	P46779	60S ribosomal protein L28 [OS=Homo sapiens]		0	42	8	94	8	137	15.7	12.02	40.01	cell organization and biogenesis;metabolic process;regulation of biological process;transport	cytosol;membrane;ribosome	protein binding;RNA binding;structural molecule activity	Pf01778	6158	ENSG00000108107.14	RPL28	19	Cytoplasmic Ribosomal Proteins	Ribosome	Peptide chain elongation; Eukaryotic Translation Termination; Viral mRNA Translation; L13a-mediated translational silencing of Ceruloplasmin expression; Nonsense Mediated Decay (NMD) independent of the Exon Junction Complex (EJC); Selenocysteine synthesis; Nonsense Mediated Decay (NMD) enhanced by the Exon Junction Complex (EJC); GTP hydrolysis and joining of the 60S ribosomal subunit; Major path…	34	23.23	0	Acetyl [N-Term]	4.09392e+08	4.72349e+08	4.4327e+08	4.4167e+08	2.57269e+07	3.5874e+08	4.5888e+08	4.26168e+08	4.14596e+08	4.16924e+07	1.24973e+06	2.14632e+06	1.71742	0.780245
n/a	High	Master Protein	P20700	Lamin-B1 [OS=Homo sapiens]		0	47	29	216	28	586	66.4	5.16	173.76	regulation of biological process;response to stimulus	membrane;nucleus	catalytic activity;motor activity;protein binding;structural molecule activity	Pf00038, Pf00932, Pf01576, Pf07888, Pf09726, Pf09731, Pf10186, Pf12128	4001	ENSG00000113368.11	LMNB1	5	Fas Ligand (FasL) pathway and Stress induction of Heat Shock Proteins (HSP) regulation	Apoptosis	Gene and protein expression by JAK-STAT signaling after Interleukin-12 stimulation; Breakdown of the nuclear lamina; Initiation of Nuclear Envelope Reformation; Clearance of Nuclear Envelope Membranes from Chromatin; Meiotic synapsis; Depolymerisation of the Nuclear Lamina; Formation of Senescence-Associated Heterochromatin Foci (SAHF); Deregulated CDK5 triggers multiple neurodegenerative pathway…	34	65.26	0		3.71403e+08	4.76621e+08	4.51149e+08	4.33058e+08	4.48196e+07	2.48691e+08	3.97766e+08	4.18258e+08	3.54905e+08	7.55693e+07	3.34758e+06	5.74735e+06	1.71687	0.77978
n/a	High	Master Protein	Q92841	Probable ATP-dependent RNA helicase DDX17 [OS=Homo sapiens]		0	14	11	165	8	729	80.2	8.27	142.22	cell differentiation;cell organization and biogenesis;defense response;metabolic process;regulation of biological process;response to stimulus	cytoplasm;cytosol;membrane;nucleus	catalytic activity;nucleotide binding;protein binding;RNA binding	Pf00270, Pf00271	10521	ENSG00000100201.20	DDX17	22	RIG-I-like Receptor Signaling			1	45.35	0		3.54577e+08	4.72326e+08	4.6757e+08	4.31491e+08	5.4421e+07	4.08254e+08	7.79364e+08	8.63733e+08	6.83784e+08	1.9785e+08	2.72642e+08	4.67568e+08	1.71495	0.778167
n/a	High	Master Protein	Q00610-2	Isoform 2 of Clathrin heavy chain 1 [OS=Homo sapiens]		0	24	32	285	32	1639	187.8	5.69	227.83	cell differentiation;cell division;cell organization and biogenesis;cellular component movement;metabolic process;regulation of biological process;response to stimulus;transport	cytosol;endosome;membrane;vacuole	protein binding;RNA binding;structural molecule activity	Pf00637, Pf01394, Pf04053, Pf09268, Pf13838	1213	ENSG00000141367.11	CLTC	17	Synaptic Vesicle Pathway; VEGFA-VEGFR2 Signaling Pathway; Complement and Coagulation Cascades			3	125.84	0		3.51252e+08	4.77801e+08	4.30491e+08	4.19848e+08	5.22087e+07	2.85431e+08	4.23838e+08	4.23959e+08	3.77743e+08	6.52741e+07	5.94216e+06	1.01767e+07	1.71262	0.776205
n/a	High	Master Protein	P46939	Utrophin [OS=Homo sapiens]		0	4	15	64	15	3433	394.2	5.33	33.01	cell organization and biogenesis;regulation of biological process;response to stimulus	cytoplasm;cytoskeleton;membrane	metal ion binding;protein binding	Pf00307, Pf00397, Pf00435, Pf00569, Pf09068, Pf09069, Pf11971	7402	ENSG00000152818.18	UTRN	6	Primary Focal Segmental Glomerulosclerosis FSGS			1	18.63	0		3.23922e+08	4.69415e+08	4.62864e+08	4.18734e+08	6.70954e+07	3.47848e+08	5.60977e+08	5.60186e+08	4.89671e+08	1.00284e+08	40669.3	69529.4	1.70963	0.773682
n/a	High	Master Protein	P05556-1	Integrin beta-1 [OS=Homo sapiens]		0	17	16	174	16	798	88.4	5.39	179.97	cell differentiation;cell growth;cell organization and biogenesis;cellular component movement;defense response;metabolic process;regulation of biological process;response to stimulus;transport	cell surface;cytoplasm;endosome;membrane	enzyme regulator activity;metal ion binding;protein binding;receptor activity;signal transducer activity	Pf00362, Pf07965, Pf08725	3688	ENSG00000150093.18	ITGB1	10	Integrin-mediated Cell Adhesion; Prolactin Signaling Pathway; Neural Crest Differentiation; Arrhythmogenic Right Ventricular Cardiomyopathy; Pathogenic Escherichia coli infection; Primary Focal Segmental Glomerulosclerosis FSGS; Focal Adhesion; Signaling of Hepatocyte Growth Factor Receptor; Rac1/Pak1/p38/MMP-2 pathway; TGF-beta Signaling Pathway; Factors and pathways affecting insulin-like growt…	Pertussis; Dilated cardiomyopathy; PI3K-Akt signaling pathway; Bacterial invasion of epithelial cells; Phagosome; Cell adhesion molecules (CAMs); Shigellosis; Arrhythmogenic right ventricular cardiomyopathy (ARVC); ECM-receptor interaction; Regulation of actin cytoskeleton; Leishmaniasis; Hypertrophic cardiomyopathy (HCM); Focal adhesion; Pathogenic Escherichia coli infection; Axon guidance; Toxo…	Integrin cell surface interactions; Signal transduction by L1; Basigin interactions; MET activates PTK2 signaling; Molecules associated with elastic fibres; Platelet Adhesion to exposed collagen; Syndecan interactions; CHL1 interactions; ECM proteoglycans; Laminin interactions; Localization of the PINCH-ILK-PARVIN complex to focal adhesions; Immunoregulatory interactions between a Lymphoid and a …	74	59.37	0		3.55748e+08	4.17605e+08	4.61564e+08	4.11639e+08	4.34047e+07	1.97896e+08	2.93673e+08	2.98967e+08	2.63512e+08	4.64478e+07	1.27649e+07	2.17826e+07	1.70645	0.770997
n/a	High	Master Protein	P26641	elongation factor 1-gamma [OS=Homo sapiens]		0	41	17	175	17	437	50.1	6.67	111.18	metabolic process;response to stimulus	cytoplasm;cytosol;endoplasmic reticulum;membrane;nucleus	catalytic activity;protein binding;RNA binding	Pf00043, Pf00647, Pf02798, Pf13409, Pf13410, Pf13417, Pf14497	1937	ENSG00000254772.9	EEF1G	11	Translation Factors	Legionellosis	Eukaryotic Translation Elongation	5	58.2	0	Acetyl [N-Term]	3.02641e+08	4.61354e+08	4.63929e+08	4.09308e+08	7.54322e+07	2.05095e+08	3.39081e+08	3.7917e+08	3.07782e+08	7.44321e+07	7.27518e+06	1.23912e+07	1.70321	0.76826
n/a	High	Master Protein	P06703	protein S100-A6 [OS=Homo sapiens]		0	46	5	60	5	90	10.2	5.48	18.01	cell organization and biogenesis;regulation of biological process;response to stimulus;transport	cytoplasm;cytosol;extracellular;membrane;nucleus	metal ion binding;protein binding;transporter activity	Pf01023	6277	ENSG00000197956.9	S100A6	1	Gastric cancer network 2; Prostaglandin Synthesis and Regulation			2	13.21	0	Acetyl [N-Term]	3.27416e+08	4.41267e+08	4.19279e+08	3.95987e+08	4.93114e+07	4.5379e+08	6.9087e+08	7.06061e+08	6.16907e+08	1.15508e+08	1.96623e+06	3.34404e+06	1.70074	0.766162
n/a	High	Master Protein	P62158	Calmodulin [OS=Homo sapiens]		0	43	9	89	7	149	16.8	4.22	47.87	metabolic process;regulation of biological process;response to stimulus;transport	cytoplasm;cytoskeleton;cytosol;extracellular;membrane	catalytic activity;enzyme regulator activity;metal ion binding;protein binding;transporter activity	Pf00036, Pf08726, Pf12763, Pf13202, Pf13405, Pf13499, Pf13833, Pf14658	808; 805; 801	ENSG00000160014.16; ENSG00000143933.16; ENSG00000198668.10	CALM3; CALM2; CALM1	19; 2; 14	Physiological and Pathological Hypertrophy of the Heart; MicroRNAs in cardiomyocyte hypertrophy; Alzheimers Disease; Endothelin Pathways; T-Cell Receptor and Co-stimulatory Signaling; Common Pathways Underlying Drug Addiction; Cardiac Hypertrophic Response; Myometrial Relaxation and Contraction Pathways; Melatonin metabolism and effects; G Protein Signaling Pathways; T-Cell antigen Receptor (TCR)…	Inflammatory mediator regulation of TRP channels; cAMP signaling pathway; Dopaminergic synapse; Amphetamine addiction; Rap1 signaling pathway; Circadian entrainment; Adrenergic signaling in cardiomyocytes; Pertussis; Oocyte meiosis; GnRH signaling pathway; Calcium signaling pathway; Insulin signaling pathway; Neurotrophin signaling pathway; Olfactory transduction; Phosphatidylinositol signaling s…	Smooth Muscle Contraction; Uptake and function of anthrax toxins; Stimuli-sensing channels; Translocation of GLUT4 to the plasma membrane; Synthesis of IP3 and IP4 in the cytosol; Reduction of cytosolic Ca++ levels; CREB phosphorylation through the activation of CaMKII; Ion homeostasis; Ca2+ pathway; Phase 0 - rapid depolarisation; Calcineurin activates NFAT; Platelet degranulation ; eNOS activat…	150	37.09	0	Acetyl [N-Term]	3.02827e+08	4.22469e+08	4.59399e+08	3.94898e+08	6.68273e+07	1.69054e+08	3.33934e+08	3.68786e+08	2.90591e+08	8.711e+07	7.29416e+06	1.24038e+07	1.70051	0.765964
n/a	High	Master Protein	P35580	Myosin-10 [OS=Homo sapiens]		0	26	53	414	43	1976	228.9	5.54	469.59	cell organization and biogenesis;cellular component movement;metabolic process;regulation of biological process;transport	cytoplasm;cytosol;nucleus	catalytic activity;motor activity;nucleotide binding;protein binding;transporter activity	Pf00063, Pf00769, Pf01496, Pf01576, Pf02736, Pf04111, Pf05622, Pf05911, Pf06637, Pf07888, Pf09726, Pf12128, Pf13094, Pf13514	4628	ENSG00000133026.12	MYH10	17	Regulation of Actin Cytoskeleton	Regulation of actin cytoskeleton; Tight junction; Salmonella infection	RHO GTPases activate PAKs; EPHA-mediated growth cone collapse; RHO GTPases Activate ROCKs; Sema4D induced cell migration and growth-cone collapse; RHO GTPases activate CIT; RHO GTPases activate PKNs	18	173.08	0		3.25299e+08	4.15492e+08	4.08498e+08	3.83096e+08	4.09685e+07	1.66601e+08	2.37766e+08	2.63327e+08	2.22565e+08	4.09251e+07	2.67642e+06	4.52039e+06	1.68897	0.756141
n/a	High	Master Protein	P46777	60S ribosomal protein L5 [OS=Homo sapiens]		0	38	12	138	12	297	34.3	9.72	81.57	cell organization and biogenesis;metabolic process;regulation of biological process;transport	cytoplasm;cytosol;membrane;nucleus;ribosome	protein binding;RNA binding;structural molecule activity	Pf00861, Pf14204	6125	ENSG00000122406.12	RPL5	1	Cytoplasmic Ribosomal Proteins	Ribosome	Peptide chain elongation; Eukaryotic Translation Termination; Viral mRNA Translation; L13a-mediated translational silencing of Ceruloplasmin expression; Nonsense Mediated Decay (NMD) independent of the Exon Junction Complex (EJC); Selenocysteine synthesis; Nonsense Mediated Decay (NMD) enhanced by the Exon Junction Complex (EJC); GTP hydrolysis and joining of the 60S ribosomal subunit; Major path…	34	36.58	0		3.58359e+08	3.97957e+08	3.88874e+08	3.8173e+08	1.69367e+07	3.27244e+08	4.26771e+08	4.76986e+08	4.10334e+08	6.22273e+07	4.49268e+06	7.57271e+06	1.68557	0.753233
n/a	High	Master Protein	P11387	DNA topoisomerase 1 [OS=Homo sapiens]		0.001	7	4	16	4	765	90.7	9.31	11.11	cell death;cell division;cell organization and biogenesis;metabolic process;regulation of biological process;response to stimulus	chromosome;cytoplasm;nucleus	catalytic activity;DNA binding;nucleotide binding;protein binding;RNA binding	Pf01028, Pf02919, Pf14370	7150	ENSG00000198900.5	TOP1	20			SUMOylation of DNA replication proteins	5	9.1	0.00125628	Acetyl [N-Term]	2.84737e+08	4.16097e+08	4.39405e+08	3.80079e+08	6.80856e+07	3.32027e+08	5.53431e+08	5.70722e+08	4.85393e+08	1.08676e+08	4.07275e+06	6.86084e+06	1.68457	0.752382
n/a	High	Master Protein	P62241	40S ribosomal protein S8 [OS=Homo sapiens]		0	67	16	187	16	208	24.2	10.32	152.88	cell organization and biogenesis;metabolic process;transport	cytoplasm;cytosol;endoplasmic reticulum;membrane;nucleus;ribosome	protein binding;RNA binding;structural molecule activity	Pf01201	6202	ENSG00000142937.11	RPS8	1	Cytoplasmic Ribosomal Proteins	Ribosome	Peptide chain elongation; Eukaryotic Translation Termination; Viral mRNA Translation; Formation of the ternary complex, and subsequently, the 43S complex; L13a-mediated translational silencing of Ceruloplasmin expression; Selenocysteine synthesis; Nonsense Mediated Decay (NMD) independent of the Exon Junction Complex (EJC); Nonsense Mediated Decay (NMD) enhanced by the Exon Junction Complex (EJC)…	38	62.47	0		3.07785e+08	4.10208e+08	4.11281e+08	3.76425e+08	4.85374e+07	2.81219e+08	4.03777e+08	4.38561e+08	3.74519e+08	6.74844e+07	3.29286e+07	5.54632e+07	1.68435	0.752192
n/a	High	Master Protein	Q99832	T-complex protein 1 subunit eta [OS=Homo sapiens]		0	31	15	110	15	543	59.3	7.65	72.23	metabolic process;regulation of biological process;transport	cytoplasm;cytosol;mitochondrion	nucleotide binding;protein binding	Pf00118	10574	ENSG00000135624.15	CCT7	2			Prefoldin mediated transfer of substrate to CCT/TriC; Cooperation of PDCL (PhLP1) and TRiC/CCT in G-protein beta folding; Association of TriC/CCT with target proteins during biosynthesis; Formation of tubulin folding intermediates by CCT/TriC; Folding of actin by CCT/TriC	9	41.21	0		2.86955e+08	4.2965e+08	3.99892e+08	3.72165e+08	6.14654e+07	1.86682e+08	2.93053e+08	3.11307e+08	2.63681e+08	5.49541e+07	3.8849e+07	6.52778e+07	1.68029	0.748714
n/a	High	Master Protein	P29401	Transketolase [OS=Homo sapiens]		0	33	20	141	20	623	67.8	7.66	79.67	metabolic process;regulation of biological process	cytosol	catalytic activity;metal ion binding;protein binding	Pf00456, Pf00676, Pf02775, Pf02779, Pf02780, Pf09364	7086	ENSG00000163931.15	TKT	3	Pentose Phosphate Pathway	Pentose phosphate pathway; Biosynthesis of amino acids; Metabolic pathways; Carbon metabolism	Insulin effects increased synthesis of Xylulose-5-Phosphate; Pentose phosphate pathway (hexose monophosphate shunt)	10	58.12	0	Acetyl [N-Term]	3.30529e+08	3.5997e+08	4.22141e+08	3.7088e+08	3.81879e+07	2.19351e+08	3.15858e+08	3.31931e+08	2.89047e+08	4.97169e+07	2.15716e+07	3.62024e+07	1.67825	0.746956
n/a	High	Master Protein	P50990	T-complex protein 1 subunit theta [OS=Homo sapiens]		0	35	18	118	18	548	59.6	5.6	60.27	cell organization and biogenesis;metabolic process;regulation of biological process;transport	cytoplasm;cytoskeleton;cytosol;extracellular;organelle lumen	catalytic activity;nucleotide binding;protein binding	Pf00118	10694	ENSG00000156261.12	CCT8	21			BBSome-mediated cargo-targeting to cilium; Prefoldin mediated transfer of substrate to CCT/TriC; Cooperation of PDCL (PhLP1) and TRiC/CCT in G-protein beta folding; Association of TriC/CCT with target proteins during biosynthesis; Neutrophil degranulation; Folding of actin by CCT/TriC; Formation of tubulin folding intermediates by CCT/TriC	16	50.27	0		3.15396e+08	3.90105e+08	3.92203e+08	3.65902e+08	3.57229e+07	9.2196e+07	1.54436e+08	1.58937e+08	1.3519e+08	3.04566e+07	7.46357e+06	1.2502e+07	1.67507	0.744222
n/a	High	Master Protein	P60660	Myosin light polypeptide 6 [OS=Homo sapiens]		0	62	8	185	8	151	16.9	4.65	115.47	cellular component movement	cytosol;membrane	catalytic activity;metal ion binding;motor activity;protein binding;structural molecule activity	Pf00036, Pf13405, Pf13499	4637	ENSG00000092841.18	MYL6	12	Focal Adhesion	Oxytocin signaling pathway; Vascular smooth muscle contraction	RHO GTPases activate PAKs; EPHA-mediated growth cone collapse; RHO GTPases Activate ROCKs; Sema4D induced cell migration and growth-cone collapse; Smooth Muscle Contraction; RHO GTPases activate CIT; RHO GTPases activate PKNs	19	52.92	0	Acetyl [N-Term]	2.74707e+08	4.08496e+08	4.0376e+08	3.62321e+08	6.19827e+07	1.49973e+08	2.58669e+08	2.81532e+08	2.30058e+08	5.73926e+07	2.44057e+06	4.08713e+06	1.67466	0.743867
n/a	High	Master Protein	P19338	Nucleolin [OS=Homo sapiens]		0	20	14	123	14	710	76.6	4.7	68.94	regulation of biological process;response to stimulus	cytoplasm;membrane;nucleus	DNA binding;protein binding;RNA binding	Pf00076, Pf13893, Pf14259	4691	ENSG00000115053.15	NCL	2	Pathogenic Escherichia coli infection; VEGFA-VEGFR2 Signaling Pathway	Pathogenic Escherichia coli infection	Major pathway of rRNA processing in the nucleolus and cytosol	7	43.37	0		2.84787e+08	3.80048e+08	3.96023e+08	3.5362e+08	4.9107e+07	2.11598e+08	3.28493e+08	3.46601e+08	2.95564e+08	5.98316e+07	6.14497e+07	1.02844e+08	1.67363	0.74298
n/a	High	Master Protein	P62266	40S ribosomal protein S23 [OS=Homo sapiens]		0	50	8	78	8	143	15.8	10.49	51.71	cell organization and biogenesis;metabolic process;transport	cytosol;membrane;ribosome	protein binding;RNA binding;structural molecule activity	Pf00164	6228	ENSG00000186468.12	RPS23	5	Cytoplasmic Ribosomal Proteins	Ribosome	Peptide chain elongation; Eukaryotic Translation Termination; Viral mRNA Translation; Formation of the ternary complex, and subsequently, the 43S complex; L13a-mediated translational silencing of Ceruloplasmin expression; Selenocysteine synthesis; Nonsense Mediated Decay (NMD) independent of the Exon Junction Complex (EJC); Nonsense Mediated Decay (NMD) enhanced by the Exon Junction Complex (EJC)…	38	35.22	0		3.095e+08	3.84365e+08	3.51982e+08	3.48616e+08	3.0656e+07	2.46319e+08	3.29745e+08	3.43558e+08	3.06541e+08	4.2955e+07	3.49989e+06	5.85422e+06	1.67269	0.742167
n/a	High	Master Protein	P61254	60S ribosomal protein L26 [OS=Homo sapiens]		0	54	11	126	11	145	17.2	10.55	96.97	cell organization and biogenesis;metabolic process;regulation of biological process;response to stimulus;transport	cytoplasm;cytosol;membrane;ribosome	protein binding;RNA binding;structural molecule activity	Pf00467	6154	ENSG00000161970.12	RPL26	17	Cytoplasmic Ribosomal Proteins	Ribosome	Peptide chain elongation; Eukaryotic Translation Termination; Viral mRNA Translation; L13a-mediated translational silencing of Ceruloplasmin expression; Nonsense Mediated Decay (NMD) independent of the Exon Junction Complex (EJC); Selenocysteine synthesis; Nonsense Mediated Decay (NMD) enhanced by the Exon Junction Complex (EJC); GTP hydrolysis and joining of the 60S ribosomal subunit; Major path…	34	37.54	0		3.13523e+08	3.39045e+08	3.76051e+08	3.42873e+08	2.56698e+07	2.22279e+08	3.63944e+08	3.73566e+08	3.1993e+08	6.91612e+07	1.77028e+06	2.95817e+06	1.67102	0.740726
n/a	High	Master Protein	P62280	40S ribosomal protein S11 [OS=Homo sapiens]		0	46	13	79	13	158	18.4	10.3	19.85	cell differentiation;cell organization and biogenesis;metabolic process;transport	cytoplasm;cytosol;membrane;ribosome	protein binding;RNA binding;structural molecule activity	Pf00366	6205	ENSG00000142534.6	RPS11	19	Cytoplasmic Ribosomal Proteins	Ribosome	Peptide chain elongation; Eukaryotic Translation Termination; Viral mRNA Translation; Formation of the ternary complex, and subsequently, the 43S complex; L13a-mediated translational silencing of Ceruloplasmin expression; Selenocysteine synthesis; Nonsense Mediated Decay (NMD) independent of the Exon Junction Complex (EJC); Nonsense Mediated Decay (NMD) enhanced by the Exon Junction Complex (EJC)…	38	24.73	0		2.72995e+08	4.0363e+08	3.49723e+08	3.42116e+08	5.36019e+07	2.12783e+08	3.44515e+08	3.46174e+08	3.01157e+08	6.24939e+07	1.21985e+07	2.03766e+07	1.67041	0.740204
n/a	High	Master Protein	P06576	ATP synthase subunit beta, mitochondrial [OS=Homo sapiens]		0	47	16	219	16	529	56.5	5.4	178.01	cell differentiation;cell organization and biogenesis;cellular homeostasis;metabolic process;regulation of biological process;transport	cell surface;membrane;mitochondrion;nucleus;organelle lumen	catalytic activity;nucleotide binding;protein binding;transporter activity	Pf00006, Pf00306, Pf02874	506	ENSG00000110955.8	ATP5B	12	Electron Transport Chain; Oxidative phosphorylation	Metabolic pathways; Parkinson's disease; Alzheimer's disease; Oxidative phosphorylation; Huntington's disease	Transcriptional activation of mitochondrial biogenesis; Cristae formation; Mitochondrial protein import; Formation of ATP by chemiosmotic coupling; Metabolism of proteins	17	99.43	0		2.64637e+08	3.76881e+08	3.72808e+08	3.38109e+08	5.19788e+07	3.36008e+08	5.51258e+08	5.85502e+08	4.90922e+08	1.1043e+08	980001	1.63589e+06	1.66928	0.739225
n/a	High	Master Protein	P62913	60S ribosomal protein L11 [OS=Homo sapiens]		0	38	9	73	9	178	20.2	9.6	23.65	cell organization and biogenesis;metabolic process;regulation of biological process;transport	cytoplasm;cytosol;membrane;nucleus;ribosome	protein binding;RNA binding;structural molecule activity	Pf00281, Pf00673	6135	ENSG00000142676.12	RPL11	1	Cytoplasmic Ribosomal Proteins	Ribosome	Peptide chain elongation; Eukaryotic Translation Termination; Viral mRNA Translation; L13a-mediated translational silencing of Ceruloplasmin expression; Nonsense Mediated Decay (NMD) independent of the Exon Junction Complex (EJC); Selenocysteine synthesis; Nonsense Mediated Decay (NMD) enhanced by the Exon Junction Complex (EJC); GTP hydrolysis and joining of the 60S ribosomal subunit; Major path…	34	18.95	0		2.90018e+08	3.75011e+08	3.45288e+08	3.36772e+08	3.52171e+07	2.74148e+08	3.99329e+08	3.95342e+08	3.56273e+08	5.80938e+07	1.55423e+06	2.59214e+06	1.66779	0.737938
n/a	High	Master Protein	P50991	T-complex protein 1 subunit delta [OS=Homo sapiens]		0	32	16	128	16	539	57.9	7.83	95.31	metabolic process;regulation of biological process;transport	cytoplasm;cytoskeleton;cytosol	nucleotide binding;protein binding;RNA binding	Pf00118	10575	ENSG00000115484.14	CCT4	2			BBSome-mediated cargo-targeting to cilium; Prefoldin mediated transfer of substrate to CCT/TriC; Cooperation of PDCL (PhLP1) and TRiC/CCT in G-protein beta folding; Association of TriC/CCT with target proteins during biosynthesis; Formation of tubulin folding intermediates by CCT/TriC; Folding of actin by CCT/TriC	13	52.39	0		2.6665e+08	3.8697e+08	3.47188e+08	3.33603e+08	5.00508e+07	1.14206e+08	1.8146e+08	1.876e+08	1.61089e+08	3.32457e+07	1.31918e+06	2.19969e+06	1.66747	0.737662
n/a	High	Master Protein	P23396-1	40S ribosomal protein S3 [OS=Homo sapiens]		0	72	20	182	20	243	26.7	9.66	125.94	cell death;cell division;cell organization and biogenesis;metabolic process;regulation of biological process;response to stimulus;transport	cytoplasm;cytoskeleton;cytosol;endoplasmic reticulum;membrane;mitochondrion;nucleus;organelle lumen;ribosome	catalytic activity;DNA binding;protein binding;RNA binding;structural molecule activity	Pf00189, Pf07650	6188	ENSG00000149273.14	RPS3	11	Cytoplasmic Ribosomal Proteins	Ribosome	Peptide chain elongation; Eukaryotic Translation Termination; Viral mRNA Translation; Formation of the ternary complex, and subsequently, the 43S complex; L13a-mediated translational silencing of Ceruloplasmin expression; Selenocysteine synthesis; Nonsense Mediated Decay (NMD) independent of the Exon Junction Complex (EJC); Nonsense Mediated Decay (NMD) enhanced by the Exon Junction Complex (EJC)…	38	63.4	0	Acetyl [N-Term]	3.16427e+08	2.8643e+08	3.75008e+08	3.25955e+08	3.67841e+07	2.67144e+08	4.14673e+08	3.71604e+08	3.5114e+08	6.19423e+07	548445	909571	1.65846	0.72984
n/a	High	Master Protein	P09651-1	Heterogeneous nuclear ribonucleoprotein A1 [OS=Homo sapiens]		0	49	20	246	18	372	38.7	9.13	205.28	cell communication;metabolic process;regulation of biological process;response to stimulus;transport	cytoplasm;membrane;nucleus;spliceosomal complex	DNA binding;protein binding;RNA binding	Pf00076, Pf13893, Pf14259	3178	ENSG00000135486.17	HNRNPA1	12	mRNA Processing	Spliceosome	mRNA Splicing - Major Pathway; FGFR2 alternative splicing	11	142.23	0		3.05013e+08	3.54248e+08	3.1754e+08	3.256e+08	2.08928e+07	2.73429e+08	3.45538e+08	3.51722e+08	3.23563e+08	3.55396e+07	6.28321e+07	1.04109e+08	1.65693	0.728517
n/a	High	Master Protein	P23528	Cofilin-1 [OS=Homo sapiens]		0	87	20	206	15	166	18.5	8.09	126.65	cell organization and biogenesis;cellular component movement;metabolic process;regulation of biological process;response to stimulus	cytoplasm;cytoskeleton;cytosol;membrane;nucleus	protein binding	Pf00241	1072	ENSG00000172757.12	CFL1	11	Brain-Derived Neurotrophic Factor (BDNF) signaling pathway; VEGFA-VEGFR2 Signaling Pathway; EGF/EGFR Signaling Pathway; Regulation of Actin Cytoskeleton; G13 Signaling Pathway	Axon guidance; Pertussis; Fc gamma R-mediated phagocytosis; Regulation of actin cytoskeleton	Platelet degranulation ; Sema3A PAK dependent Axon repulsion; Gene and protein expression by JAK-STAT signaling after Interleukin-12 stimulation; EPHB-mediated forward signaling; Regulation of actin dynamics for phagocytic cup formation; Interleukin-12 family signaling	27	78.72	0	Acetyl [N-Term]	2.63248e+08	3.41712e+08	3.67952e+08	3.24304e+08	4.44825e+07	2.31068e+08	4.62551e+08	5.1512e+08	4.02913e+08	1.23394e+08	1.62142e+07	2.68183e+07	1.654	0.725958
n/a	High	Master Protein	P62258-1	14-3-3 protein epsilon [OS=Homo sapiens]		0	38	11	115	9	255	29.2	4.74	109.63	cell organization and biogenesis;cellular component movement;cellular homeostasis;metabolic process;regulation of biological process;response to stimulus;transport	cytoplasm;cytosol;membrane;mitochondrion;nucleus	protein binding;RNA binding	Pf00244	7531	ENSG00000108953.16; ENSG00000274474.3	YWHAE	17; CHR_HSCHR17_2_CTG2	Cell Cycle; Myometrial Relaxation and Contraction Pathways; VEGFA-VEGFR2 Signaling Pathway; Calcium Regulation in the Cardiac Cell; Sudden Infant Death Syndrome (SIDS) Susceptibility Pathways	Cell cycle; Neurotrophin signaling pathway; Oocyte meiosis; Epstein-Barr virus infection; PI3K-Akt signaling pathway; Hippo signaling pathway; Viral carcinogenesis	Regulation of PLK1 Activity at G2/M Transition; Recruitment of NuMA to mitotic centrosomes; Loss of Nlp from mitotic centrosomes; NADE modulates death signalling; Translocation of GLUT4 to the plasma membrane; Deregulated CDK5 triggers multiple neurodegenerative pathways in Alzheimer's disease models; Chk1/Chk2(Cds1) mediated inactivation of Cyclin B:Cdk1 complex; Signaling by Hippo; AURKA Activa…	65	44.27	0	Acetyl [N-Term]	2.48876e+08	3.59913e+08	3.45076e+08	3.17955e+08	4.92203e+07	1.73275e+08	2.81861e+08	2.96446e+08	2.50527e+08	5.49496e+07	3.51393e+07	5.80897e+07	1.65313	0.725198
n/a	High	Master Protein	P02533	Keratin, type I cytoskeletal 14 [OS=Homo sapiens]		0	69	37	385	11	472	51.5	5.16	446.72	cell death;cell differentiation;cell organization and biogenesis;response to stimulus	cytoplasm;cytosol;nucleus	protein binding;structural molecule activity	Pf00038, Pf13514	3861	ENSG00000186847.5	KRT14	17	Corticotropin-releasing hormone signaling pathway		Formation of the cornified envelope; Type I hemidesmosome assembly	7	153.06	0		2.5293e+08	3.73362e+08	3.26283e+08	3.17525e+08	4.95545e+07	2.20802e+08	3.80466e+08	3.67277e+08	3.22848e+08	7.23586e+07	6.32985e+06	1.04468e+07	1.6504	0.722815
n/a	High	Master Protein	P27635	60S ribosomal protein L10 [OS=Homo sapiens]		0	54	10	83	10	214	24.6	10.08	61.99	cell organization and biogenesis;metabolic process;regulation of biological process;transport	cytosol;endoplasmic reticulum;membrane;nucleus;ribosome	protein binding;RNA binding;structural molecule activity;translation regulator activity	Pf00252	6134		RPL10	X	Cytoplasmic Ribosomal Proteins	Ribosome	Peptide chain elongation; Eukaryotic Translation Termination; Viral mRNA Translation; L13a-mediated translational silencing of Ceruloplasmin expression; Nonsense Mediated Decay (NMD) independent of the Exon Junction Complex (EJC); Selenocysteine synthesis; Nonsense Mediated Decay (NMD) enhanced by the Exon Junction Complex (EJC); GTP hydrolysis and joining of the 60S ribosomal subunit; Major path…	34	16.48	0		2.60994e+08	3.62775e+08	3.24718e+08	3.16162e+08	4.19901e+07	2.23756e+08	3.42927e+08	3.71827e+08	3.12837e+08	6.40847e+07	2.05615e+07	3.38828e+07	1.64788	0.720608
n/a	High	Master Protein	P59665	Neutrophil defensin 1 [OS=Homo sapiens]		0	34	6	656	6	94	10.2	6.99	259.64	cell organization and biogenesis;cellular component movement;defense response;regulation of biological process;response to stimulus;transport	extracellular;organelle lumen		Pf00323, Pf00879	1667; 728358	ENSG00000206047.2; ENSG00000240247.7	DEFA1; DEFA1B	8			Alpha-defensins; Neutrophil degranulation	6	43.28	0		2.21727e+08	4.16685e+08	3.05871e+08	3.14761e+08	7.98391e+07	2.68813e+08	4.56737e+08	4.66605e+08	3.97385e+08	9.10032e+07	2.11047e+06	3.47377e+06	1.64597	0.71894
n/a	High	Master Protein	P51991-1	Heterogeneous nuclear ribonucleoprotein A3 [OS=Homo sapiens]		0	50	19	233	4	378	39.6	9.01	203.14	metabolic process;transport	cytoplasm;nucleus;spliceosomal complex	protein binding;RNA binding;transporter activity	Pf00076, Pf13893, Pf14259	220988	ENSG00000170144.20	HNRNPA3	2		Spliceosome	mRNA Splicing - Major Pathway	5	113.17	0	Acetyl [N-Term]	2.65843e+08	3.53716e+08	3.22668e+08	3.14075e+08	3.63848e+07	2.40091e+08	3.71133e+08	4.06433e+08	3.39219e+08	7.15601e+07	4.30105e+06	7.0706e+06	1.64392	0.717144
n/a	High	Master Protein	P05107	Integrin beta-2 [OS=Homo sapiens]		0	57	38	441	38	769	84.7	6.95	361.79	cell communication;cell death;cell differentiation;cell organization and biogenesis;cellular component movement;defense response;metabolic process;regulation of biological process;response to stimulus;transport	cell surface;membrane	metal ion binding;protein binding;receptor activity;signal transducer activity	Pf00362, Pf07965, Pf08725	3689		ITGB2	21	Integrin-mediated Cell Adhesion; Focal Adhesion; Focal Adhesion-PI3K-Akt-mTOR-signaling pathway; Microglia Pathogen Phagocytosis Pathway; TYROBP Causal Network	HTLV-I infection; Leukocyte transendothelial migration; Cell adhesion molecules (CAMs); Phagosome; Amoebiasis; Viral myocarditis; Natural killer cell mediated cytotoxicity; Malaria; Hippo signaling pathway; Staphylococcus aureus infection; Tuberculosis; Complement and coagulation cascades; Leishmaniasis; Legionellosis; Pertussis; Regulation of actin cytoskeleton; Rap1 signaling pathway; Rheumatoi…	Integrin cell surface interactions; Neutrophil degranulation; Immunoregulatory interactions between a Lymphoid and a non-Lymphoid cell; Toll Like Receptor 4 (TLR4) Cascade; Cell surface interactions at the vascular wall; Interleukin-4 and 13 signaling	37	231.3	0		2.44355e+08	3.37479e+08	3.53345e+08	3.11726e+08	4.8077e+07	1.7722e+08	2.45958e+08	3.09124e+08	2.44101e+08	5.38656e+07	1.34887e+06	2.19861e+06	1.62996	0.704837
n/a	High	Master Protein	P35232	Prohibitin [OS=Homo sapiens]		0	54	15	109	15	272	29.8	5.76	47.77	cell differentiation;cell organization and biogenesis;metabolic process;regulation of biological process;response to stimulus;transport	cell surface;cytoplasm;endosome;membrane;mitochondrion;nucleus	DNA binding;protein binding	Pf01145	5245	ENSG00000167085.11	PHB	17	Integrated Breast Cancer Pathway		Paradoxical activation of RAF signaling by kinase inactive BRAF; Processing of SMDT1; RAF activation; Signaling by RAS mutants; Signaling by moderate kinase activity BRAF mutants; Interleukin-20 family signaling	19	49.47	0		2.49838e+08	3.46255e+08	3.202e+08	3.05431e+08	4.07237e+07	2.45974e+08	4.19483e+08	4.11536e+08	3.58997e+08	7.99853e+07	1.40629e+07	2.28219e+07	1.62285	0.698526
n/a	High	Master Protein	P78371-1	T-complex protein 1 subunit beta [OS=Homo sapiens]		0	30	17	123	17	535	57.5	6.46	76.74	cell organization and biogenesis;metabolic process;regulation of biological process;transport	cytoplasm;cytosol;extracellular;organelle lumen	nucleotide binding;protein binding	Pf00118	10576	ENSG00000166226.12	CCT2	12			BBSome-mediated cargo-targeting to cilium; Prefoldin mediated transfer of substrate to CCT/TriC; Cooperation of PDCL (PhLP1) and TRiC/CCT in G-protein beta folding; Association of TriC/CCT with target proteins during biosynthesis; Neutrophil degranulation; Folding of actin by CCT/TriC; Formation of tubulin folding intermediates by CCT/TriC	16	39.96	0		2.84067e+08	3.14948e+08	3.10684e+08	3.03233e+08	1.3664e+07	1.4347e+08	1.96386e+08	1.72555e+08	1.70804e+08	2.16387e+07	5.91011e+07	9.5898e+07	1.62261	0.698317
n/a	High	Master Protein	Q9Y2D5-6	Isoform 4 of A-kinase anchor protein 2 [OS=Homo sapiens]		0.009	4	5	17	5	1090	120.6	5.05	2.01	regulation of biological process	membrane			445815; 114299; 11217	ENSG00000157654.17	PALM2-AKAP2; PALM2; AKAP2	9	G Protein Signaling Pathways			1	6.62	0.00102354		2.19024e+08	3.3871e+08	3.41127e+08	2.9962e+08	5.69988e+07	2.32332e+08	4.13863e+08	4.27806e+08	3.58e+08	8.90432e+07	1.6771e+07	2.71877e+07	1.62112	0.69699
n/a	High	Master Protein	P07355	Annexin A2 [OS=Homo sapiens]		0	58	23	245	23	339	38.6	7.75	230.32	cell organization and biogenesis;metabolic process;regulation of biological process;response to stimulus;transport	cell surface;cytoplasm;cytosol;endoplasmic reticulum;endosome;extracellular;membrane;nucleus;organelle lumen	enzyme regulator activity;metal ion binding;protein binding;RNA binding	Pf00191	302	ENSG00000182718.16	ANXA2	15	Prostaglandin Synthesis and Regulation		Dissolution of Fibrin Clot; Gene and protein expression by JAK-STAT signaling after Interleukin-12 stimulation; Smooth Muscle Contraction; Neutrophil degranulation; Interleukin-12 family signaling	12	88.67	0	Acetyl [N-Term]	2.62263e+08	3.20232e+08	3.11076e+08	2.97857e+08	2.54447e+07	2.09164e+08	3.38964e+08	3.94042e+08	3.14057e+08	7.75036e+07	3.56542e+07	5.77589e+07	1.61998	0.695973
n/a	Medium	Master Protein	O00712-4	Isoform 4 of Nuclear factor 1 B-type [OS=Homo sapiens]		0.023	5	3	65	3	471	53	8.68	1.61	cell differentiation;cell organization and biogenesis;cellular component movement;metabolic process;regulation of biological process	nucleus	DNA binding	Pf00859, Pf03165, Pf10524, Pf15362	4781		NFIB	9				0	4.87	0.000867303		2.4139e+08	3.36721e+08	3.13184e+08	2.97098e+08	4.05468e+07	2.19531e+08	3.48735e+08	3.47527e+08	3.05264e+08	6.06248e+07	1.29667e+06	2.09914e+06	1.61887	0.694983
n/a	High	Master Protein	P06748	Nucleophosmin [OS=Homo sapiens]		0	19	6	80	6	294	32.6	4.78	71.72	cell growth;cell organization and biogenesis;cellular homeostasis;metabolic process;regulation of biological process;response to stimulus;transport	cytoplasm;cytoskeleton;cytosol;membrane;nucleus	DNA binding;enzyme regulator activity;protein binding;RNA binding	Pf03066	4869	ENSG00000181163.13	NPM1	5			Nuclear import of Rev protein; TFAP2A acts as a transcriptional repressor during retinoic acid induced cell differentiation; TP53 regulates transcription of additional cell cycle genes whose exact role in the p53 pathway remain uncertain; Deposition of new CENPA-containing nucleosomes at the centromere	18	34.39	0		2.46811e+08	3.06734e+08	3.3338e+08	2.95642e+08	3.6202e+07	1.53232e+08	2.44056e+08	2.56868e+08	2.18052e+08	4.61323e+07	2.25042e+06	3.63578e+06	1.6156	0.692068
n/a	High	Master Protein	Q00839	Heterogeneous nuclear ribonucleoprotein U [OS=Homo sapiens]		0	16	16	143	16	825	90.5	6	94.37	cell differentiation;metabolic process;regulation of biological process;response to stimulus	cell surface;chromosome;cytoplasm;membrane;nucleus;spliceosomal complex	DNA binding;nucleotide binding;protein binding;RNA binding	Pf00622, Pf13671	3192	ENSG00000153187.18	HNRNPU	1	mRNA Processing	Spliceosome	mRNA Splicing - Major Pathway	6	63.69	0		2.27249e+08	3.30352e+08	3.22265e+08	2.93288e+08	4.68138e+07	1.8317e+08	3.05179e+08	3.48736e+08	2.79028e+08	7.00757e+07	5.09441e+06	8.22154e+06	1.61384	0.690494
n/a	High	Master Protein	P61978	Heterogeneous nuclear ribonucleoprotein K [OS=Homo sapiens]		0	49	19	240	19	463	50.9	5.54	209.53	metabolic process;regulation of biological process;response to stimulus	cytoplasm;membrane;nucleus;spliceosomal complex	DNA binding;protein binding;RNA binding	Pf00013, Pf08067, Pf13014, Pf13083	3190	ENSG00000165119.20	HNRNPK	9	mRNA Processing	Herpes simplex infection; MicroRNAs in cancer; Spliceosome; Viral carcinogenesis	mRNA Splicing - Major Pathway; SUMOylation of RNA binding proteins	14	100.66	0		2.36241e+08	3.31506e+08	3.05702e+08	2.9115e+08	4.023e+07	2.06757e+08	3.0215e+08	3.26935e+08	2.78614e+08	5.18082e+07	4.93373e+08	7.95263e+08	1.61189	0.688752
n/a	High	Master Protein	Q14315	Filamin-C [OS=Homo sapiens]		0	14	36	223	27	2725	290.8	5.97	235.78	cell organization and biogenesis	cytoplasm;cytoskeleton;cytosol;membrane	protein binding	Pf00307, Pf00630	2318	ENSG00000128591.15	FLNC	7		Focal adhesion; Salmonella infection; Proteoglycans in cancer; MAPK signaling pathway	Cell-extracellular matrix interactions	7	50.33	0		2.29451e+08	3.32837e+08	3.04608e+08	2.88966e+08	4.36325e+07	2.2699e+08	3.52843e+08	3.52531e+08	3.10788e+08	5.92545e+07	2.08085e+06	3.33965e+06	1.60494	0.682523
n/a	High	Master Protein	P62244	40S ribosomal protein S15a [OS=Homo sapiens]		0	52	7	76	7	130	14.8	10.13	20.57	cell organization and biogenesis;metabolic process;regulation of biological process;response to stimulus;transport	cytoplasm;cytosol;membrane;mitochondrion;ribosome	protein binding;RNA binding;structural molecule activity	Pf00410	6210	ENSG00000134419.15	RPS15A	16	Cytoplasmic Ribosomal Proteins	Ribosome	Peptide chain elongation; Eukaryotic Translation Termination; Viral mRNA Translation; Formation of the ternary complex, and subsequently, the 43S complex; L13a-mediated translational silencing of Ceruloplasmin expression; Selenocysteine synthesis; Nonsense Mediated Decay (NMD) independent of the Exon Junction Complex (EJC); Nonsense Mediated Decay (NMD) enhanced by the Exon Junction Complex (EJC)…	38	18.39	0		2.62879e+08	2.85004e+08	3.16741e+08	2.88208e+08	2.21054e+07	2.37685e+08	3.66598e+08	3.66449e+08	3.23577e+08	6.07349e+07	1.61143e+07	2.58609e+07	1.60484	0.682432
n/a	High	Master Protein	P05387	60S acidic ribosomal protein P2 [OS=Homo sapiens]		0	40	6	69	6	115	11.7	4.54	55.48	cell organization and biogenesis;metabolic process;transport	cytosol;membrane;ribosome	protein binding;structural molecule activity	Pf00428	6181	ENSG00000177600.8	RPLP2	11	Cytoplasmic Ribosomal Proteins	Ribosome	Peptide chain elongation; Eukaryotic Translation Termination; Viral mRNA Translation; L13a-mediated translational silencing of Ceruloplasmin expression; Nonsense Mediated Decay (NMD) independent of the Exon Junction Complex (EJC); Selenocysteine synthesis; Nonsense Mediated Decay (NMD) enhanced by the Exon Junction Complex (EJC); GTP hydrolysis and joining of the 60S ribosomal subunit; Major path…	34	38.6	0		2.2043e+08	3.37183e+08	2.99878e+08	2.8583e+08	4.86883e+07	1.92264e+08	3.33925e+08	3.42003e+08	2.89397e+08	6.8763e+07	694340	1.1143e+06	1.60484	0.682429
n/a	High	Master Protein	P46782	40S ribosomal protein S5 [OS=Homo sapiens]		0	31	9	103	9	204	22.9	9.72	57.5	cell organization and biogenesis;metabolic process;regulation of biological process;transport	cytosol;membrane;ribosome	protein binding;RNA binding;structural molecule activity	Pf00177	6193	ENSG00000083845.8	RPS5	19	Cytoplasmic Ribosomal Proteins	Ribosome	Peptide chain elongation; Eukaryotic Translation Termination; Viral mRNA Translation; Formation of the ternary complex, and subsequently, the 43S complex; L13a-mediated translational silencing of Ceruloplasmin expression; Selenocysteine synthesis; Nonsense Mediated Decay (NMD) independent of the Exon Junction Complex (EJC); Nonsense Mediated Decay (NMD) enhanced by the Exon Junction Complex (EJC)…	38	26.76	0		2.82524e+08	2.6446e+08	3.0978e+08	2.85588e+08	1.86281e+07	2.35634e+08	3.43249e+08	3.3227e+08	3.03718e+08	4.83508e+07	1.09593e+07	1.75629e+07	1.60255	0.680367
n/a	High	Master Protein	P55072	Transitional endoplasmic reticulum ATPase [OS=Homo sapiens]		0	44	30	179	30	806	89.3	5.26	93.21	cell communication;cell organization and biogenesis;metabolic process;regulation of biological process;response to stimulus;transport	cytoplasm;cytosol;endoplasmic reticulum;extracellular;membrane;nucleus;organelle lumen;proteasome	catalytic activity;enzyme regulator activity;nucleotide binding;protein binding;RNA binding	Pf00004, Pf00910, Pf01057, Pf01078, Pf02359, Pf02933, Pf05496, Pf05673, Pf06068, Pf07724, Pf07726, Pf07728, Pf09336, Pf13191, Pf13207, Pf13401	7415	ENSG00000165280.15	VCP	9		Legionellosis; Protein processing in endoplasmic reticulum	Protein methylation; Translesion Synthesis by POLH; N-glycan trimming in the ER and Calnexin/Calreticulin cycle; Josephin domain DUBs; Ovarian tumor domain proteases; ABC-family proteins mediated transport; HSF1 activation; Hh mutants that don't undergo autocatalytic processing are degraded by ERAD; E3 ubiquitin ligases ubiquitinate target proteins; Neutrophil degranulation; Defective CFTR causes…	35	101.52	0	Acetyl [N-Term]	2.4158e+08	3.13114e+08	2.97645e+08	2.84113e+08	3.07312e+07	1.56958e+08	2.39793e+08	2.55327e+08	2.17359e+08	4.31787e+07	4.70543e+06	7.53768e+06	1.60191	0.679793
n/a	High	Master Protein	Q9BR76	Coronin-1B [OS=Homo sapiens]		0	14	10	143	10	489	54.2	5.88	73.27	cell organization and biogenesis;cellular component movement;regulation of biological process;response to stimulus	cytoplasm;cytoskeleton;cytosol;membrane	protein binding	Pf00400, Pf08953, Pf08954	57175	ENSG00000172725.13	CORO1B	11				0	27.02	0		2.8369e+08	2.44496e+08	3.15116e+08	2.811e+08	2.88884e+07	4.35416e+08	6.12962e+08	6.21243e+08	5.56541e+08	8.57144e+07	2.99524e+06	4.79786e+06	1.60183	0.679719
n/a	High	Master Protein	P52597	Heterogeneous nuclear ribonucleoprotein F [OS=Homo sapiens]		0	43	12	92	11	415	45.6	5.58	117.85	metabolic process;regulation of biological process;response to stimulus	cytosol;membrane;nucleus;spliceosomal complex	protein binding;RNA binding	Pf00076, Pf08080, Pf14259	3185	ENSG00000169813.16	HNRNPF	10	Mecp2 and Associated Rett Syndrome		Gene and protein expression by JAK-STAT signaling after Interleukin-12 stimulation; mRNA Splicing - Major Pathway; FGFR2 alternative splicing; Interleukin-12 family signaling	15	51.66	0		2.25115e+08	3.21585e+08	2.88779e+08	2.78493e+08	4.00497e+07	2.09244e+08	3.3848e+08	3.46467e+08	2.98063e+08	6.28897e+07	2.10151e+06	3.35826e+06	1.59802	0.67629
n/a	High	Master Protein	P13645	Keratin, type I cytoskeletal 10 [OS=Homo sapiens]		0	56	35	994	27	584	58.8	5.21	905.16	cell death;cell differentiation;metabolic process	cytoplasm;cytoskeleton;cytosol;membrane;nucleus	structural molecule activity	Pf00038, Pf04111	3858	ENSG00000186395.7	KRT10	17		Staphylococcus aureus infection	Formation of the cornified envelope	4	250.59	0		2.19599e+08	3.10706e+08	3.0216e+08	2.77488e+08	4.10824e+07	1.5525e+08	3.16845e+08	2.92443e+08	2.54846e+08	7.1126e+07	1.26053e+07	2.00906e+07	1.59382	0.672491
n/a	High	Master Protein	P62851	40S ribosomal protein S25 [OS=Homo sapiens]		0	15	3	96	3	125	13.7	10.11	64.5	cell organization and biogenesis;metabolic process;transport	cytosol;nucleus;ribosome	catalytic activity;nucleotide binding;protein binding;RNA binding;structural molecule activity	Pf03297	6230	ENSG00000280831.2; ENSG00000118181.10	RPS25	11; CHR_HG2217_PATCH	Cytoplasmic Ribosomal Proteins	Ribosome	Peptide chain elongation; Eukaryotic Translation Termination; Viral mRNA Translation; Formation of the ternary complex, and subsequently, the 43S complex; L13a-mediated translational silencing of Ceruloplasmin expression; Selenocysteine synthesis; Nonsense Mediated Decay (NMD) independent of the Exon Junction Complex (EJC); Nonsense Mediated Decay (NMD) enhanced by the Exon Junction Complex (EJC)…	38	7.32	0.00108342		2.26136e+08	3.08778e+08	2.86981e+08	2.73965e+08	3.4971e+07	1.52939e+08	2.6313e+08	2.81476e+08	2.32515e+08	5.67652e+07	8.41778e+07	1.34043e+08	1.59238	0.671183
n/a	High	Master Protein	P30101	Protein disulfide-isomerase A3 [OS=Homo sapiens]		0	45	27	215	27	505	56.7	6.35	168.49	cellular homeostasis;metabolic process;regulation of biological process;response to stimulus;transport	cell surface;endoplasmic reticulum;membrane;nucleus;organelle lumen	catalytic activity;protein binding;RNA binding	Pf00085, Pf13098, Pf13848, Pf13899, Pf13905	2923	ENSG00000167004.12	PDIA3	15		Protein processing in endoplasmic reticulum; Antigen processing and presentation	ER-Phagosome pathway; Calnexin/calreticulin cycle; Antigen Presentation: Folding, assembly and peptide loading of class I MHC	13	80.97	0		2.34607e+08	2.83538e+08	2.99781e+08	2.72642e+08	2.77005e+07	3.24087e+08	5.23106e+08	5.5551e+08	4.67568e+08	1.02315e+08	2.6191e+07	4.16495e+07	1.59022	0.669229
n/a	High	Master Protein	P49368-1	T-complex protein 1 subunit gamma [OS=Homo sapiens]		0	29	15	133	15	545	60.5	6.49	76.63	cell organization and biogenesis;metabolic process;regulation of biological process;transport	cytoplasm;cytoskeleton;cytosol;membrane	nucleotide binding;protein binding;RNA binding	Pf00118	7203	ENSG00000163468.14	CCT3	1			BBSome-mediated cargo-targeting to cilium; Prefoldin mediated transfer of substrate to CCT/TriC; Cooperation of PDCL (PhLP1) and TRiC/CCT in G-protein beta folding; Association of TriC/CCT with target proteins during biosynthesis; Formation of tubulin folding intermediates by CCT/TriC; Folding of actin by CCT/TriC	13	44.93	0		2.26968e+08	2.96977e+08	2.90877e+08	2.71607e+08	3.1663e+07	7.62376e+07	1.26787e+08	1.38871e+08	1.13965e+08	2.71295e+07	2.26917e+06	3.60337e+06	1.58797	0.66718
n/a	High	Master Protein	P22626	heterogeneous nuclear ribonucleoproteins A2/B1 [OS=Homo sapiens]		0	59	21	269	20	353	37.4	8.95	242.23	metabolic process;regulation of biological process;response to stimulus;transport	cytoplasm;extracellular;membrane;nucleus;spliceosomal complex	DNA binding;protein binding;RNA binding	Pf00076, Pf13893, Pf14259	3181	ENSG00000122566.20	HNRNPA2B1	7	mRNA Processing		Gene and protein expression by JAK-STAT signaling after Interleukin-12 stimulation; Interleukin-12 family signaling; mRNA Splicing - Major Pathway	10	108.66	0		2.41515e+08	2.87566e+08	2.77553e+08	2.68878e+08	1.97758e+07	2.80267e+08	4.03176e+08	4.17948e+08	3.6713e+08	6.17171e+07	1.60467e+07	2.54787e+07	1.58779	0.667017
n/a	High	Master Protein	Q9UBF2	Coatomer subunit gamma-2 [OS=Homo sapiens]		0	5	6	49	5	871	97.6	5.81	28.48	transport	cytoplasm;cytosol;Golgi;membrane	structural molecule activity	Pf01602, Pf08752, Pf13646	26958	ENSG00000158623.14	COPG2	7			COPI-dependent Golgi-to-ER retrograde traffic; COPI-mediated anterograde transport	11	8.29	0.00116686		2.08136e+08	3.11165e+08	2.78458e+08	2.6592e+08	4.29858e+07	2.40954e+08	4.48038e+08	5.14866e+08	4.01286e+08	1.16609e+08	4.31491e+08	6.83784e+08	1.5847	0.66421
		Master Protein	Q96RW7-1	Hemicentin-1 [OS=Homo sapiens]			0	3	21	3	5635	613	6.49		cell division;response to stimulus	cell surface;cytoplasm;extracellular;membrane	metal ion binding;protein binding	Pf00047, Pf00090, Pf00092, Pf06247, Pf07474, Pf07645, Pf07654, Pf07679, Pf07686, Pf08205, Pf12662, Pf12947, Pf13519, Pf13895, Pf13927, Pf14670	83872	ENSG00000143341.11	HMCN1	1				0	3.94	0.000799361		2.15534e+08	3.11306e+08	2.5309e+08	2.59976e+08	3.94006e+07	9.56261e+07	1.477e+08	1.59229e+08	1.34185e+08	2.76684e+07	1.89484e+06	3.00202e+06	1.58431	0.663856
n/a	High	Master Protein	Q5SSJ5-1	Heterochromatin protein 1-binding protein 3 [OS=Homo sapiens]		0	17	10	49	10	553	61.2	9.67	19.35	cell organization and biogenesis;regulation of biological process;response to stimulus	chromosome;nucleus	DNA binding;protein binding	Pf00538	50809	ENSG00000127483.17	HP1BP3	1				0	14.55	0		1.92334e+08	2.86719e+08	2.89541e+08	2.56198e+08	4.51733e+07	1.41538e+08	2.3486e+08	2.27919e+08	2.01439e+08	4.24511e+07	3.52288e+06	5.58076e+06	1.58415	0.663706
n/a	Medium	Master Protein	O43379-1	Wd repeat-containing protein 62 [OS=Homo sapiens]		0.023	1	1	2	1	1518	165.8	5.91	0	cell differentiation;cell organization and biogenesis;metabolic process	cytoplasm;cytoskeleton;nucleus;spliceosomal complex	protein binding;RNA binding	Pf00400	284403	ENSG00000075702.16	WDR62	19				0		0		2.1233e+08	2.82635e+08	2.67983e+08	2.54316e+08	3.02853e+07	2.27667e+08	3.7144e+08	3.84786e+08	3.27964e+08	7.11302e+07	4.48957e+07	7.10449e+07	1.58244	0.662152
n/a	High	Master Protein	P46459	Vesicle-fusing ATPase [OS=Homo sapiens]		0	23	18	171	18	744	82.5	6.95	106.73	cell organization and biogenesis;metabolic process;regulation of biological process;response to stimulus;transport	cytoplasm;cytosol;membrane	catalytic activity;metal ion binding;nucleotide binding;protein binding;RNA binding	Pf00004, Pf00910, Pf01078, Pf02359, Pf02933, Pf05272, Pf05496, Pf06068, Pf07724, Pf07728, Pf13173, Pf13191, Pf13207, Pf13401	4905	ENSG00000073969.18; ENSG00000278174.3; ENSG00000276262.2	NSF	17; CHR_HSCHR17_1_CTG5; CHR_HSCHR17_2_CTG5	Synaptic Vesicle Pathway; Brain-Derived Neurotrophic Factor (BDNF) signaling pathway	Synaptic vesicle cycle; Vasopressin-regulated water reabsorption; GABAergic synapse	COPI-dependent Golgi-to-ER retrograde traffic; Intra-Golgi traffic; COPII (Coat Protein 2) Mediated Vesicle Transport; COPI-mediated anterograde transport; Retrograde transport at the Trans-Golgi-Network; Trafficking of GluR2-containing AMPA receptors	25	52.64	0		2.04866e+08	2.62764e+08	2.64393e+08	2.44008e+08	2.76856e+07	1.28009e+08	2.0034e+08	2.22506e+08	1.83618e+08	4.03497e+07	1.60418e+07	2.53125e+07	1.57791	0.658014
n/a	High	Master Protein	P16615-3	Isoform 3 of Sarcoplasmic/endoplasmic reticulum calcium ATPase 2 [OS=Homo sapiens]		0	24	22	149	15	999	109.8	5.36	161.62	cell organization and biogenesis;cellular homeostasis;regulation of biological process;response to stimulus;transport	endoplasmic reticulum;membrane	catalytic activity;metal ion binding;nucleotide binding;protein binding;transporter activity	Pf00122, Pf00689, Pf00690, Pf00702, Pf08282, Pf12710, Pf13246	488		ATP2A2	12	Arrhythmogenic Right Ventricular Cardiomyopathy; Myometrial Relaxation and Contraction Pathways; Calcium Regulation in the Cardiac Cell			3	69.95	0		2.12919e+08	2.66778e+08	2.44196e+08	2.41297e+08	2.2083e+07	2.07405e+08	2.9272e+08	2.94074e+08	2.64733e+08	4.05408e+07	3.11314e+07	4.8907e+07	1.57099	0.651671
n/a	High	Master Protein	O95831-3	Isoform 3 of Apoptosis-inducing factor 1, mitochondrial [OS=Homo sapiens]		0	19	14	133	14	609	66.3	8.94	79.34	cell death;cell organization and biogenesis;metabolic process;regulation of biological process;response to stimulus	cytosol;membrane;mitochondrion;nucleus	catalytic activity;DNA binding;nucleotide binding;protein binding	Pf00070, Pf07992, Pf14721, Pf14962	9131	ENSG00000156709.13	AIFM1	X	Apoptosis Modulation and Signaling; Nanomaterial induced apoptosis; Apoptosis Modulation by HSP70			3	29.62	0		1.97163e+08	2.59854e+08	2.49822e+08	2.35613e+08	2.7495e+07	2.08254e+08	3.43389e+08	3.78362e+08	3.10002e+08	7.33496e+07	4.27022e+07	6.69489e+07	1.56781	0.64875
n/a	High	Master Protein	P36578	60S ribosomal protein L4 [OS=Homo sapiens]		0	34	19	152	19	427	47.7	11.06	120.66	cell organization and biogenesis;metabolic process;transport	cytoplasm;cytosol;endoplasmic reticulum;membrane;nucleus;ribosome	protein binding;RNA binding;structural molecule activity	Pf00573, Pf14374	6124	ENSG00000174444.14	RPL4	15	Cytoplasmic Ribosomal Proteins	Ribosome	Peptide chain elongation; Eukaryotic Translation Termination; Viral mRNA Translation; L13a-mediated translational silencing of Ceruloplasmin expression; Nonsense Mediated Decay (NMD) independent of the Exon Junction Complex (EJC); Selenocysteine synthesis; Nonsense Mediated Decay (NMD) enhanced by the Exon Junction Complex (EJC); GTP hydrolysis and joining of the 60S ribosomal subunit; Major path…	34	72.44	0	Acetyl [N-Term]	2.37163e+08	1.82681e+08	2.72531e+08	2.30792e+08	3.69567e+07	1.68365e+08	2.60338e+08	2.32039e+08	2.20247e+08	3.84623e+07	3.52842e+06	5.51083e+06	1.56184	0.643248
n/a	High	Master Protein	Q07020	60S ribosomal protein L18 [OS=Homo sapiens]		0	34	10	63	10	188	21.6	11.72	48.02	cell organization and biogenesis;metabolic process;transport	cytoplasm;cytosol;endoplasmic reticulum;membrane;nucleus;ribosome	RNA binding;structural molecule activity	Pf00828	6141	ENSG00000063177.12	RPL18	19	Cytoplasmic Ribosomal Proteins	Ribosome	Peptide chain elongation; Eukaryotic Translation Termination; Viral mRNA Translation; L13a-mediated translational silencing of Ceruloplasmin expression; Nonsense Mediated Decay (NMD) independent of the Exon Junction Complex (EJC); Selenocysteine synthesis; Nonsense Mediated Decay (NMD) enhanced by the Exon Junction Complex (EJC); GTP hydrolysis and joining of the 60S ribosomal subunit; Major path…	34	23.52	0		1.85153e+08	2.57527e+08	2.45034e+08	2.29238e+08	3.15872e+07	1.85733e+08	2.72273e+08	2.83482e+08	2.47162e+08	4.36778e+07	3.95987e+08	6.16907e+08	1.5579	0.639599
n/a	High	Master Protein	P06756	Integrin alpha-V [OS=Homo sapiens]		0	17	19	101	19	1048	116	5.68	57.54	cell differentiation;cell growth;cell organization and biogenesis;cellular component movement;cellular homeostasis;metabolic process;regulation of biological process;response to stimulus;transport	cell surface;cytosol;membrane	metal ion binding;protein binding;receptor activity;signal transducer activity;transporter activity	Pf01839, Pf08441, Pf13517	3685	ENSG00000138448.11	ITGAV	2	Osteopontin Signaling; Integrin-mediated Cell Adhesion; Arrhythmogenic Right Ventricular Cardiomyopathy; Primary Focal Segmental Glomerulosclerosis FSGS; Focal Adhesion; Osteoblast Signaling; MFAP5-mediated ovarian cancer cell motility and invasiveness; VEGFA-VEGFR2 Signaling Pathway; Focal Adhesion-PI3K-Akt-mTOR-signaling pathway	Regulation of actin cytoskeleton; Thyroid hormone signaling pathway; Small cell lung cancer; Arrhythmogenic right ventricular cardiomyopathy (ARVC); Phagosome; ECM-receptor interaction; Dilated cardiomyopathy; Focal adhesion; PI3K-Akt signaling pathway; Cell adhesion molecules (CAMs); Proteoglycans in cancer; Hypertrophic cardiomyopathy (HCM); Pathways in cancer	Integrin cell surface interactions; Signal transduction by L1; PECAM1 interactions; Cross-presentation of particulate exogenous antigens (phagosomes); VEGFA-VEGFR2 Pathway; Molecules associated with elastic fibres; Syndecan interactions; ECM proteoglycans; Laminin interactions; Neutrophil degranulation	48	35.86	0		1.95089e+08	2.22417e+08	2.59546e+08	2.25684e+08	2.64156e+07	1.42675e+08	2.14675e+08	2.05602e+08	1.87651e+08	3.20176e+07	1.00836e+06	1.56931e+06	1.5563	0.638121
n/a	High	Master Protein	Q16891-4	Isoform 4 of MICOS complex subunit MIC60 [OS=Homo sapiens]		0	22	16	108	16	757	83.5	6.57	49.35	cell organization and biogenesis;cellular homeostasis	membrane;mitochondrion	protein binding;RNA binding	Pf09731	10989	ENSG00000132305.20	IMMT	2				0	51.52	0		1.80834e+08	2.71996e+08	2.22164e+08	2.24998e+08	3.72705e+07	1.6159e+08	3.10424e+08	3.21972e+08	2.64662e+08	7.30351e+07	1.53593e+06	2.38144e+06	1.55049	0.632726
n/a	High	Master Protein	P67936	Tropomyosin alpha-4 chain [OS=Homo sapiens]		0	56	21	131	10	248	28.5	4.69	136.5	cell differentiation;cell organization and biogenesis;cellular component movement	cytoplasm;cytoskeleton;cytosol;membrane	metal ion binding;protein binding;structural molecule activity	Pf00261, Pf12718	7171	ENSG00000167460.14	TPM4	19	Striated Muscle Contraction	Hypertrophic cardiomyopathy (HCM); Dilated cardiomyopathy; Adrenergic signaling in cardiomyocytes; Cardiac muscle contraction	Smooth Muscle Contraction; Striated Muscle Contraction	8	32.44	0		2.11885e+08	2.37877e+08	2.23719e+08	2.24494e+08	1.06253e+07	2.257e+08	3.14705e+08	3.23342e+08	2.87915e+08	4.41344e+07	7.54208e+06	1.16896e+07	1.54992	0.632197
n/a	High	Master Protein	O00571	ATP-dependent RNA helicase DDX3X [OS=Homo sapiens]		0	23	15	138	15	662	73.2	7.18	75.06	cell death;cell organization and biogenesis;defense response;metabolic process;regulation of biological process;response to stimulus;transport	cytoplasm;cytosol;extracellular;membrane;mitochondrion;nucleus;organelle lumen	catalytic activity;DNA binding;enzyme regulator activity;nucleotide binding;protein binding;RNA binding	Pf00270, Pf00271, Pf04851	1654	ENSG00000215301.9	DDX3X	X	RIG-I-like Receptor Signaling	Hepatitis B; RIG-I-like receptor signaling pathway; Viral carcinogenesis	Neutrophil degranulation	7	39.25	0		2.02093e+08	2.1278e+08	2.56959e+08	2.23944e+08	2.37493e+07	1.50731e+08	2.48877e+08	2.60121e+08	2.19909e+08	4.91315e+07	1.07863e+07	1.66611e+07	1.54466	0.627293
n/a	High	Master Protein	Q9ULV4	coronin-1C [OS=Homo sapiens]		0	31	15	124	15	474	53.2	7.08	64.13	cell organization and biogenesis;cellular component movement;regulation of biological process;response to stimulus;transport	cytoplasm;cytoskeleton;membrane	protein binding	Pf00400, Pf08953, Pf08954	23603	ENSG00000110880.10	CORO1C	12				0	39.62	0		2.22827e+08	1.82378e+08	2.64254e+08	2.23153e+08	3.34263e+07	3.2006e+08	4.378e+08	4.72603e+08	4.10154e+08	6.52715e+07	518833	801247	1.54433	0.626978
n/a	High	Master Protein	P04114	apolipoprotein B-100 [OS=Homo sapiens]		0	11	54	431	54	4563	515.3	7.05	232.88	cell organization and biogenesis;cellular component movement;metabolic process;regulation of biological process;response to stimulus;transport	cytoplasm;cytosol;endoplasmic reticulum;endosome;extracellular;membrane;organelle lumen	protein binding;transporter activity	Pf01347, Pf04286, Pf06448, Pf09172, Pf12491	338		APOB	2	Selenium Micronutrient Network; Vitamin B12 Metabolism; Folate Metabolism; Statin Pathway	Fat digestion and absorption; Vitamin digestion and absorption	Post-translational protein phosphorylation; Cargo recognition for clathrin-mediated endocytosis; Regulation of Insulin-like Growth Factor (IGF) transport and uptake by Insulin-like Growth Factor Binding Proteins (IGFBPs); LDL remodeling; Scavenging by Class H Receptors; VLDL clearance; Retinoid metabolism and transport; Chylomicron remodeling; Scavenging by Class A Receptors; LDL clearance; Plate…	46	141.59	0		1.90715e+08	2.47314e+08	2.29656e+08	2.22562e+08	2.36449e+07	2.76513e+08	2.85456e+08	2.57852e+08	2.73274e+08	1.14999e+07	1.15503e+08	1.78325e+08	1.5439	0.626575
n/a	High	Master Protein	Q14204	Cytoplasmic dynein 1 heavy chain 1 [OS=Homo sapiens]		0	12	49	206	49	4646	532.1	6.4	115.6	cell division;cell organization and biogenesis;cellular component movement;regulation of biological process;transport	cytoplasm;cytoskeleton;cytosol;extracellular;membrane;organelle lumen	catalytic activity;motor activity;nucleotide binding;protein binding;RNA binding	Pf00769, Pf03028, Pf03915, Pf04156, Pf07246, Pf07728, Pf08385, Pf08393, Pf12774, Pf12775, Pf12777, Pf12780, Pf12781, Pf13173, Pf13207, Pf13401	1778	ENSG00000197102.10	DYNC1H1	14		Salmonella infection; Vasopressin-regulated water reabsorption; Phagosome	COPI-independent Golgi-to-ER retrograde traffic; Regulation of PLK1 Activity at G2/M Transition; AURKA Activation by TPX2; Anchoring of the basal body to the plasma membrane; Recruitment of NuMA to mitotic centrosomes; Recruitment of mitotic centrosome proteins and complexes; Loss of Nlp from mitotic centrosomes; Amplification of signal from unattached kinetochores via a MAD2 inhibitory signal; N…	50	87.25	0		1.88323e+08	2.42174e+08	2.31576e+08	2.20691e+08	2.32928e+07	1.00624e+08	1.45556e+08	1.48886e+08	1.31689e+08	2.20081e+07	3.31928e+06	5.12427e+06	1.54379	0.626477
n/a	High	Master Protein	Q00325-1	Phosphate carrier protein, mitochondrial [OS=Homo sapiens]		0	9	6	45	6	362	40.1	9.38	27.38	transport	membrane;mitochondrion	protein binding;transporter activity	Pf00153	5250	ENSG00000075415.12	SLC25A3	12				0	11.4	0.0014881		1.70726e+08	2.43096e+08	2.48117e+08	2.20646e+08	3.53584e+07	1.99437e+08	3.18744e+08	3.36997e+08	2.85059e+08	6.10008e+07	4.26987e+07	6.58688e+07	1.54264	0.625403
n/a	High	Master Protein	P31943	Heterogeneous nuclear ribonucleoprotein H [OS=Homo sapiens]		0	34	11	130	8	449	49.2	6.3	131.56	metabolic process;regulation of biological process;response to stimulus	cytosol;membrane;nucleus;spliceosomal complex	protein binding;RNA binding	Pf00076, Pf08080, Pf14259	3187	ENSG00000169045.17; ENSG00000284254.1	HNRNPH1	5; CHR_HG30_PATCH	Mecp2 and Associated Rett Syndrome; mRNA Processing		mRNA Splicing - Major Pathway; FGFR2 alternative splicing	11	73.15	0		1.71963e+08	2.53328e+08	2.33119e+08	2.1947e+08	3.45911e+07	1.23948e+08	2.10855e+08	2.36787e+08	1.9053e+08	4.82562e+07	5.16884e+06	7.96443e+06	1.54086	0.623731
n/a	High	Master Protein	P40429	60S ribosomal protein L13a [OS=Homo sapiens]		0	45	11	68	11	203	23.6	10.93	28.89	cell organization and biogenesis;metabolic process;regulation of biological process;response to stimulus;transport	cytoplasm;cytosol;membrane;nucleus;ribosome	RNA binding;structural molecule activity	Pf00572	23521	ENSG00000142541.16	RPL13A	19	Cytoplasmic Ribosomal Proteins	Ribosome	Peptide chain elongation; Eukaryotic Translation Termination; Viral mRNA Translation; L13a-mediated translational silencing of Ceruloplasmin expression; Nonsense Mediated Decay (NMD) independent of the Exon Junction Complex (EJC); Selenocysteine synthesis; Nonsense Mediated Decay (NMD) enhanced by the Exon Junction Complex (EJC); GTP hydrolysis and joining of the 60S ribosomal subunit; Major path…	34	22.53	0		1.78835e+08	2.50445e+08	2.27064e+08	2.18781e+08	2.98159e+07	1.78569e+08	2.74249e+08	2.85904e+08	2.4624e+08	4.80872e+07	6.67693e+06	1.02867e+07	1.54063	0.62352
n/a	High	Master Protein	P62841	40S ribosomal protein S15 [OS=Homo sapiens]		0	22	3	61	3	145	17	10.39	28.24	cell differentiation;cell organization and biogenesis;metabolic process;transport	cytosol;membrane;nucleus;ribosome	DNA binding;protein binding;RNA binding;structural molecule activity	Pf00203	6209	ENSG00000115268.9	RPS15	19	Cytoplasmic Ribosomal Proteins	Ribosome	Peptide chain elongation; Eukaryotic Translation Termination; Viral mRNA Translation; Formation of the ternary complex, and subsequently, the 43S complex; L13a-mediated translational silencing of Ceruloplasmin expression; Selenocysteine synthesis; Nonsense Mediated Decay (NMD) independent of the Exon Junction Complex (EJC); Nonsense Mediated Decay (NMD) enhanced by the Exon Junction Complex (EJC)…	38	16.26	0		2.22578e+08	2.15823e+08	2.134e+08	2.17267e+08	3.88354e+06	1.47032e+08	1.76473e+08	1.98351e+08	1.73952e+08	2.10266e+07	620084	953796	1.53817	0.621217
n/a	High	Master Protein	P26038	Moesin [OS=Homo sapiens]		0	36	30	232	23	577	67.8	6.4	146.88	cell differentiation;cell organization and biogenesis;cell proliferation;cellular component movement;regulation of biological process;response to stimulus	cell surface;cytoplasm;cytoskeleton;cytosol;membrane;nucleus	protein binding;RNA binding;structural molecule activity	Pf00373, Pf00769, Pf09379, Pf09380	4478	ENSG00000147065.16	MSN	X	Glial Cell Differentiation; AGE/RAGE pathway; Regulation of Actin Cytoskeleton	Leukocyte transendothelial migration; Measles; Proteoglycans in cancer; Regulation of actin cytoskeleton	Gene and protein expression by JAK-STAT signaling after Interleukin-12 stimulation; Interleukin-12 family signaling; Recycling pathway of L1	16	56.85	0		2.00026e+08	2.06353e+08	2.41428e+08	2.15936e+08	1.82096e+07	1.53606e+08	2.24984e+08	2.36356e+08	2.04982e+08	3.66237e+07	3.05827e+06	4.7007e+06	1.53705	0.620161
n/a	High	Master Protein	Q9Y383-3	Isoform 3 of Putative RNA-binding protein Luc7-like 2 [OS=Homo sapiens]		0	29	11	97	11	389	46.2	10.05	90.34	cell organization and biogenesis	spliceosomal complex	protein binding;RNA binding	Pf03194	51631	ENSG00000146963.17	LUC7L2	7				0	43.16	0		1.99642e+08	1.99182e+08	2.43593e+08	2.14139e+08	2.08279e+07	1.40063e+08	2.11446e+08	2.18908e+08	1.90139e+08	3.554e+07	9.08944e+06	1.39699e+07	1.53694	0.620057
n/a	High	Master Protein	P20292	Arachidonate 5-lipoxygenase-activating protein [OS=Homo sapiens]		0.007	11	2	8	2	161	18.1	8.44	2.43	cell organization and biogenesis;metabolic process;regulation of biological process;response to stimulus	endoplasmic reticulum;membrane;nucleus	antioxidant activity;catalytic activity;enzyme regulator activity;protein binding	Pf01124	241	ENSG00000132965.9	ALOX5AP	13	Selenium Micronutrient Network; Eicosanoid Synthesis	Fc epsilon RI signaling pathway	Synthesis of Leukotrienes (LT) and Eoxins (EX); Synthesis of Lipoxins (LX); Synthesis of 5-eicosatetraenoic acids	10	2.63	0.00483425		1.59403e+08	2.46784e+08	2.34472e+08	2.13553e+08	3.86183e+07	1.66137e+08	2.70288e+08	2.9551e+08	2.43978e+08	5.5997e+07	1.54579e+06	2.37138e+06	1.53409	0.61738
n/a	High	Master Protein	P46776	60S ribosomal protein L27a [OS=Homo sapiens]		0	42	8	68	8	148	16.6	11	44.4	cell organization and biogenesis;metabolic process;transport	cytosol;endoplasmic reticulum;membrane;ribosome	protein binding;RNA binding;structural molecule activity	Pf00828	6157	ENSG00000166441.12	RPL27A	11	Cytoplasmic Ribosomal Proteins	Ribosome	Peptide chain elongation; Eukaryotic Translation Termination; Viral mRNA Translation; L13a-mediated translational silencing of Ceruloplasmin expression; Nonsense Mediated Decay (NMD) independent of the Exon Junction Complex (EJC); Selenocysteine synthesis; Nonsense Mediated Decay (NMD) enhanced by the Exon Junction Complex (EJC); GTP hydrolysis and joining of the 60S ribosomal subunit; Major path…	34	19.79	0		1.70938e+08	2.23883e+08	2.43362e+08	2.12728e+08	3.0601e+07	1.44129e+08	2.48415e+08	2.4625e+08	2.12931e+08	4.86586e+07	9.31999e+06	1.42965e+07	1.53396	0.617257
n/a	High	Master Protein	P18669	Phosphoglycerate mutase 1 [OS=Homo sapiens]		0	39	10	124	10	254	28.8	7.18	98.89	metabolic process;regulation of biological process;transport	cytoplasm;cytosol;extracellular;membrane;organelle lumen	catalytic activity;protein binding	Pf00300	5223; 643576	ENSG00000171314.8	PGAM1; LOC643576	10; 12	Cori Cycle; Glycolysis and Gluconeogenesis	Glycolysis / Gluconeogenesis; Carbon metabolism; Metabolic pathways; Glucagon signaling pathway; Central carbon metabolism in cancer; Biosynthesis of amino acids; Glycine, serine and threonine metabolism	Gluconeogenesis; Glycolysis; Neutrophil degranulation	17	59.6	0		1.70741e+08	2.43613e+08	2.16843e+08	2.10399e+08	3.00969e+07	9.49113e+07	1.37985e+08	1.47913e+08	1.26937e+08	2.30052e+07	7.71244e+06	1.18053e+07	1.53068	0.614173
n/a	High	Master Protein	Q6P2Q9	Pre-mRNA-processing-splicing factor 8 [OS=Homo sapiens]		0	9	24	134	24	2335	273.4	8.84	66.08	cell organization and biogenesis;metabolic process;response to stimulus	membrane;nucleus;spliceosomal complex	catalytic activity;protein binding;RNA binding	Pf01398, Pf08082, Pf08083, Pf08084, Pf10596, Pf10597, Pf10598, Pf12134	10594	ENSG00000174231.16; ENSG00000274442.2	PRPF8	17; CHR_HSCHR17_1_CTG2	mRNA Processing	Spliceosome	mRNA Splicing - Major Pathway; mRNA Splicing - Minor Pathway	7	30	0		1.71078e+08	2.31425e+08	2.27524e+08	2.10009e+08	2.75742e+07	8.82573e+07	1.47022e+08	1.5888e+08	1.31387e+08	3.08788e+07	4.54694e+06	6.95648e+06	1.52993	0.613462
n/a	High	Master Protein	O43175	D-3-phosphoglycerate dehydrogenase [OS=Homo sapiens]		0	25	11	123	11	533	56.6	6.71	107.89	metabolic process	cytosol	catalytic activity;nucleotide binding	Pf00389, Pf02826	26227	ENSG00000092621.11	PHGDH	1	Trans-sulfuration and one carbon metabolism	Carbon metabolism; Biosynthesis of amino acids; Metabolic pathways; Glycine, serine and threonine metabolism	Serine biosynthesis	9	71.86	0		1.54474e+08	2.38164e+08	2.34748e+08	2.09129e+08	3.86716e+07	6.49328e+07	1.16571e+08	1.25058e+08	1.02187e+08	2.65697e+07	1.29947e+06	1.98169e+06	1.52499	0.608801
n/a	High	Master Protein	P17987	T-complex protein 1 subunit alpha [OS=Homo sapiens]		0	34	20	104	20	556	60.3	6.11	60.82	cell organization and biogenesis;metabolic process;regulation of biological process;response to stimulus;transport	cytoplasm;cytoskeleton;cytosol;Golgi	nucleotide binding;protein binding;RNA binding	Pf00118	6950	ENSG00000120438.11	TCP1	6			BBSome-mediated cargo-targeting to cilium; Prefoldin mediated transfer of substrate to CCT/TriC; Gene and protein expression by JAK-STAT signaling after Interleukin-12 stimulation; Cooperation of PDCL (PhLP1) and TRiC/CCT in G-protein beta folding; Association of TriC/CCT with target proteins during biosynthesis; Folding of actin by CCT/TriC; Formation of tubulin folding intermediates by CCT/TriC…	18	44.51	0		1.58032e+08	2.28555e+08	2.4038e+08	2.08989e+08	3.6354e+07	7.85712e+07	1.14879e+08	1.10399e+08	1.01283e+08	1.61635e+07	4.93754e+06	7.5282e+06	1.52469	0.608513
n/a	High	Master Protein	P62826	GTP-binding nuclear protein RAN [OS=Homo sapiens]		0	43	12	125	12	216	24.4	7.49	53.66	cell division;cell organization and biogenesis;metabolic process;regulation of biological process;response to stimulus;transport	chromosome;cytoplasm;cytosol;endosome;membrane;nucleus	catalytic activity;metal ion binding;nucleotide binding;protein binding;RNA binding;transporter activity	Pf00025, Pf00071, Pf08477	5901	ENSG00000132341.11	RAN	12	Androgen receptor signaling pathway; miRNA Biogenesis	Ribosome biogenesis in eukaryotes; HTLV-I infection; Epstein-Barr virus infection; RNA transport	MicroRNA (miRNA) biogenesis; Rev-mediated nuclear export of HIV RNA; Nuclear import of Rev protein; Regulation of cholesterol biosynthesis by SREBP (SREBF); NEP/NS2 Interacts with the Cellular Export Machinery; tRNA processing in the nucleus; Transcriptional regulation by small RNAs	30	30.96	0	Acetyl [N-Term]	1.60126e+08	2.34112e+08	2.31863e+08	2.087e+08	3.43597e+07	1.16078e+08	1.72768e+08	1.81805e+08	1.56883e+08	2.90887e+07	5.60883e+06	8.54338e+06	1.5232	0.607106
n/a	High	Master Protein	O00232-1	26s proteasome non-atpase regulatory subunit 12 [OS=Homo sapiens]		0.001	9	5	28	5	456	52.9	7.65	16.42	metabolic process;regulation of biological process;response to stimulus;transport	cytoplasm;cytosol;extracellular;membrane;organelle lumen;proteasome	catalytic activity;protein binding	Pf01399	5718	ENSG00000197170.9	PSMD12	17	Proteasome Degradation; Parkin-Ubiquitin Proteasomal System pathway	Epstein-Barr virus infection; Proteasome	Regulation of RAS by GAPs; CDT1 association with the CDC6:ORC:origin complex; Downstream TCR signaling; UCH proteinases; NIK-->noncanonical NF-kB signaling; Hh mutants that don't undergo autocatalytic processing are degraded by ERAD; SCF-beta-TrCP mediated degradation of Emi1; Neutrophil degranulation; Cross-presentation of soluble exogenous antigens (endosomes); Separation of Sister Chromatids; …	153	9.15	0.00126263		2.05971e+08	2.20284e+08	1.78957e+08	2.01737e+08	1.71352e+07	1.4944e+08	1.71321e+08	1.57474e+08	1.59412e+08	9.03772e+06	1.89234e+07	2.88041e+07	1.52214	0.606104
n/a	High	Master Protein	P39019	40S ribosomal protein S19 [OS=Homo sapiens]		0	32	5	102	5	145	16.1	10.32	62.48	cell differentiation;cell organization and biogenesis;cellular component movement;defense response;metabolic process;regulation of biological process;response to stimulus;transport	cytoplasm;cytosol;membrane;nucleus;ribosome	protein binding;RNA binding;structural molecule activity	Pf01090	6223	ENSG00000105372.6	RPS19	19	Cytoplasmic Ribosomal Proteins	Ribosome	Peptide chain elongation; Eukaryotic Translation Termination; Viral mRNA Translation; Formation of the ternary complex, and subsequently, the 43S complex; L13a-mediated translational silencing of Ceruloplasmin expression; Selenocysteine synthesis; Nonsense Mediated Decay (NMD) independent of the Exon Junction Complex (EJC); Nonsense Mediated Decay (NMD) enhanced by the Exon Junction Complex (EJC)…	38	19.25	0		2.03862e+08	1.78332e+08	2.14181e+08	1.98792e+08	1.50681e+07	1.88258e+08	2.6908e+08	2.33431e+08	2.30256e+08	3.30715e+07	1.82205e+07	2.77152e+07	1.5211	0.605112
n/a	High	Master Protein	A8MWD9	Putative small nuclear ribonucleoprotein G-like protein 15 [OS=Homo sapiens]		0.003	25	4	43	4	76	8.5	8.84	5.36	cell organization and biogenesis;metabolic process	nucleus;spliceosomal complex	RNA binding	Pf01423	100130932		LOC100130932; SNRPGP15	19				0	6.64	0.00102669		1.85995e+08	2.0355e+08	2.06668e+08	1.98737e+08	9.09988e+06	1.15302e+08	1.51502e+08	1.66331e+08	1.44378e+08	2.14328e+07	560782	852403	1.52002	0.604095
n/a	High	Master Protein	P15170-2	Isoform 2 of Eukaryotic peptide chain release factor GTP-binding subunit ERF3A [OS=Homo sapiens]		0	18	13	108	13	636	68.6	5.33	82.91	cell organization and biogenesis;metabolic process	cytosol	catalytic activity;nucleotide binding;protein binding;RNA binding	Pf00009, Pf03143, Pf03144, Pf07145	2935	ENSG00000103342.12	GSPT1	16				0	33.65	0		1.76218e+08	2.02781e+08	2.16323e+08	1.98441e+08	1.66578e+07	1.01918e+08	1.52289e+08	1.48787e+08	1.34331e+08	2.29641e+07	3.58738e+06	5.45257e+06	1.51993	0.604006
n/a	High	Master Protein	P02538	Keratin, type II cytoskeletal 6A [OS=Homo sapiens]		0	60	46	407	8	564	60	8	395.02	cell death;cell differentiation;cell organization and biogenesis;defense response;metabolic process;regulation of biological process;response to stimulus	cytosol;membrane;nucleus	protein binding;structural molecule activity	Pf00038, Pf04111, Pf13166	3853	ENSG00000205420.10	KRT6A	12	Ectoderm Differentiation		Formation of the cornified envelope	4	149.71	0	Acetyl [N-Term]	2.10422e+08	1.82198e+08	2.01876e+08	1.98166e+08	1.18173e+07	4.24832e+08	3.45455e+08	2.57299e+08	3.42529e+08	6.84264e+07	4.03099e+06	6.12327e+06	1.51905	0.60317
n/a	High	Master Protein	P62910	60S ribosomal protein L32 [OS=Homo sapiens]		0	32	6	55	6	135	15.9	11.33	22.7	cell organization and biogenesis;metabolic process;response to stimulus;transport	cytosol;membrane;ribosome	RNA binding;structural molecule activity	Pf01655	6161	ENSG00000144713.12	RPL32	3	Cytoplasmic Ribosomal Proteins	Ribosome	Peptide chain elongation; Eukaryotic Translation Termination; Viral mRNA Translation; L13a-mediated translational silencing of Ceruloplasmin expression; Nonsense Mediated Decay (NMD) independent of the Exon Junction Complex (EJC); Selenocysteine synthesis; Nonsense Mediated Decay (NMD) enhanced by the Exon Junction Complex (EJC); GTP hydrolysis and joining of the 60S ribosomal subunit; Major path…	34	19.27	0		1.61815e+08	2.24314e+08	2.04655e+08	1.96928e+08	2.60936e+07	1.18854e+08	1.81608e+08	1.84187e+08	1.61549e+08	3.02088e+07	1.14837e+06	1.74319e+06	1.51797	0.602146
n/a	High	Master Protein	P42766	60S ribosomal protein L35 [OS=Homo sapiens]		0	33	8	99	8	123	14.5	11.05	42.8	cell organization and biogenesis;metabolic process;transport	cytosol;membrane;ribosome	RNA binding;structural molecule activity	Pf00831	11224	ENSG00000136942.14	RPL35	9	Cytoplasmic Ribosomal Proteins	Ribosome	Peptide chain elongation; Eukaryotic Translation Termination; Viral mRNA Translation; L13a-mediated translational silencing of Ceruloplasmin expression; Nonsense Mediated Decay (NMD) independent of the Exon Junction Complex (EJC); Selenocysteine synthesis; Nonsense Mediated Decay (NMD) enhanced by the Exon Junction Complex (EJC); GTP hydrolysis and joining of the 60S ribosomal subunit; Major path…	34	21.32	0		1.83448e+08	2.14922e+08	1.92173e+08	1.96848e+08	1.32678e+07	1.84133e+08	2.40537e+08	2.19374e+08	2.14681e+08	2.32648e+07	5.7543e+06	8.7333e+06	1.5177	0.601885
n/a	High	Master Protein	Q13740-2	Isoform 2 of CD166 antigen [OS=Homo sapiens]		0	27	13	102	13	570	63.6	7.3	95.16	cell growth;cellular component movement;regulation of biological process;response to stimulus		protein binding	Pf07679, Pf08205, Pf13895, Pf13927	214	ENSG00000170017.12	ALCAM	3				0	54.7	0		1.66909e+08	2.03348e+08	2.13592e+08	1.94617e+08	2.00337e+07	1.51332e+08	2.39683e+08	2.56967e+08	2.15994e+08	4.62643e+07	2.37377e+07	3.60059e+07	1.51682	0.601053
n/a	High	Master Protein	Q14974	Importin subunit beta-1 [OS=Homo sapiens]		0	19	14	94	14	876	97.1	4.78	69.31	cell organization and biogenesis;cellular component movement;metabolic process;regulation of biological process;response to stimulus;transport	cytoplasm;cytosol;extracellular;membrane;nucleus;organelle lumen	metal ion binding;protein binding;RNA binding;transporter activity	Pf02985, Pf03810, Pf13513, Pf13646	3837	ENSG00000108424.9	KPNB1	17	Sterol Regulatory Element-Binding Proteins (SREBP) signalling	RNA transport	ISG15 antiviral mechanism; NS1 Mediated Effects on Host Pathways; Nuclear import of Rev protein; Neutrophil degranulation; Regulation of cholesterol biosynthesis by SREBP (SREBF); Transport of Ribonucleoproteins into the Host Nucleus; Activation of DNA fragmentation factor	29	35.86	0		1.52277e+08	2.29606e+08	2.00876e+08	1.94253e+08	3.19152e+07	8.51726e+07	1.30989e+08	1.34677e+08	1.16946e+08	2.25178e+07	220600	334599	1.51677	0.601
n/a	High	Master Protein	P46778	60S ribosomal protein L21 [OS=Homo sapiens]		0	34	6	60	6	160	18.6	10.49	21.5	cell organization and biogenesis;metabolic process;transport	cytosol;membrane;ribosome	protein binding;RNA binding;structural molecule activity	Pf01157	6144	ENSG00000122026.10	RPL21	13	Cytoplasmic Ribosomal Proteins	Ribosome	Peptide chain elongation; Eukaryotic Translation Termination; Viral mRNA Translation; L13a-mediated translational silencing of Ceruloplasmin expression; Nonsense Mediated Decay (NMD) independent of the Exon Junction Complex (EJC); Selenocysteine synthesis; Nonsense Mediated Decay (NMD) enhanced by the Exon Junction Complex (EJC); GTP hydrolysis and joining of the 60S ribosomal subunit; Major path…	34	19.87	0		1.67056e+08	2.10854e+08	1.99665e+08	1.92525e+08	1.85796e+07	1.31059e+08	2.00135e+08	2.21588e+08	1.84261e+08	3.86253e+07	1.54698e+08	2.34563e+08	1.51626	0.600522
n/a	High	Master Protein	Q86VP6-1	cullin-associated nedd8-dissociated protein 1 [OS=Homo sapiens]		0	9	13	58	13	1230	136.3	5.78	26.74	cell differentiation;cell organization and biogenesis;cellular homeostasis;metabolic process;regulation of biological process;transport	cytoplasm;cytosol;extracellular;Golgi;membrane;nucleus;organelle lumen	protein binding	Pf08623, Pf12755, Pf13513	55832	ENSG00000111530.12	CAND1	12	Endoderm Differentiation		Neutrophil degranulation; Iron uptake and transport; Neddylation	9	18.9	0	Acetyl [N-Term]	1.71254e+08	2.10897e+08	1.92229e+08	1.9146e+08	1.61936e+07	3.37941e+08	5.1634e+08	5.62135e+08	4.72138e+08	9.6716e+07	1.75185e+06	2.65328e+06	1.51457	0.598904
n/a	High	Master Protein	P62263	40S ribosomal protein S14 [OS=Homo sapiens]		0	40	6	82	6	151	16.3	10.05	66.28	cell differentiation;cell organization and biogenesis;metabolic process;regulation of biological process;transport	cytosol;membrane;mitochondrion;ribosome	protein binding;RNA binding;structural molecule activity;translation regulator activity	Pf00411	6208	ENSG00000164587.11	RPS14	5	Cytoplasmic Ribosomal Proteins	Ribosome	Peptide chain elongation; Eukaryotic Translation Termination; Viral mRNA Translation; Formation of the ternary complex, and subsequently, the 43S complex; L13a-mediated translational silencing of Ceruloplasmin expression; Selenocysteine synthesis; Nonsense Mediated Decay (NMD) independent of the Exon Junction Complex (EJC); Nonsense Mediated Decay (NMD) enhanced by the Exon Junction Complex (EJC)…	39	33.98	0		1.46285e+08	2.24198e+08	2.03183e+08	1.91222e+08	3.29134e+07	1.14581e+08	1.83165e+08	1.85862e+08	1.61203e+08	3.2985e+07	8.80372e+07	1.33069e+08	1.51151	0.595992
n/a	High	Master Protein	P35527	Keratin, type I cytoskeletal 9 [OS=Homo sapiens]		0	74	29	662	28	623	62	5.24	745.75	cell death;cell organization and biogenesis	cytosol;membrane;nucleus	structural molecule activity	Pf00038, Pf13166	3857	ENSG00000171403.9	KRT9	17			Formation of the cornified envelope	3	206.96	0		1.64034e+08	2.2633e+08	1.81961e+08	1.90775e+08	2.61844e+07	1.46923e+08	2.12484e+08	2.60753e+08	2.0672e+08	4.66493e+07	3.07042e+06	4.63435e+06	1.50935	0.593928
n/a	High	Master Protein	P05388	60S acidic ribosomal protein P0 [OS=Homo sapiens]		0	33	7	78	7	317	34.3	5.97	86.19	cell organization and biogenesis;metabolic process;regulation of biological process;response to stimulus;transport	cytoplasm;cytosol;endoplasmic reticulum;membrane;nucleus;ribosome	protein binding;RNA binding;structural molecule activity	Pf00428, Pf00466	6175	ENSG00000089157.15	RPLP0	12	Cytoplasmic Ribosomal Proteins	Ribosome	Peptide chain elongation; Gene and protein expression by JAK-STAT signaling after Interleukin-12 stimulation; Eukaryotic Translation Termination; Viral mRNA Translation; L13a-mediated translational silencing of Ceruloplasmin expression; Nonsense Mediated Decay (NMD) independent of the Exon Junction Complex (EJC); Selenocysteine synthesis; Nonsense Mediated Decay (NMD) enhanced by the Exon Junctio…	39	35.59	0		1.67961e+08	2.10639e+08	1.9297e+08	1.90523e+08	1.75089e+07	1.57052e+08	2.13509e+08	2.15548e+08	1.95369e+08	2.71075e+07	2.6592e+08	4.01286e+08	1.50905	0.59364
n/a	High	Master Protein	P62899	60S ribosomal protein L31 [OS=Homo sapiens]		0	48	8	76	8	125	14.5	10.54	40.49	cell organization and biogenesis;metabolic process;transport	cytosol;membrane;ribosome	protein binding;RNA binding;structural molecule activity	Pf01198	6160	ENSG00000071082.10	RPL31	2	Cytoplasmic Ribosomal Proteins	Ribosome	Peptide chain elongation; Eukaryotic Translation Termination; Viral mRNA Translation; L13a-mediated translational silencing of Ceruloplasmin expression; Nonsense Mediated Decay (NMD) independent of the Exon Junction Complex (EJC); Selenocysteine synthesis; Nonsense Mediated Decay (NMD) enhanced by the Exon Junction Complex (EJC); GTP hydrolysis and joining of the 60S ribosomal subunit; Major path…	34	20.67	0		1.46437e+08	2.16586e+08	2.07951e+08	1.90325e+08	3.12326e+07	1.3627e+08	2.21213e+08	2.4486e+08	2.00781e+08	4.66267e+07	1.88525e+06	2.84171e+06	1.50734	0.592
n/a	High	Master Protein	P09429	High mobility group protein B1 [OS=Homo sapiens]		0	40	10	113	9	215	24.9	5.74	82.48	cell differentiation;cell organization and biogenesis;cell proliferation;cellular component movement;cellular homeostasis;defense response;metabolic process;regulation of biological process;response to stimulus;transport	cell surface;chromosome;cytoplasm;endosome;extracellular;membrane;nucleus;organelle lumen	catalytic activity;DNA binding;enzyme regulator activity;protein binding;RNA binding	Pf00505, Pf09011	3146	ENSG00000189403.14	HMGB1	13	Retinoblastoma (RB) in Cancer; DNA Damage Response (only ATM dependent)	Base excision repair	TRAF6 mediated NF-kB activation; Advanced glycosylation endproduct receptor signaling; TAK1 activates NFkB by phosphorylation and activation of IKKs complex; RIP-mediated NFkB activation via ZBP1; Activated TLR4 signalling; Interleukin-1 family signaling; Neutrophil degranulation; Regulation of TLR by endogenous ligand; DEx/H-box helicases activate type I IFN and inflammatory cytokines production…	40	43.7	0		1.90416e+08	1.48997e+08	2.30505e+08	1.89973e+08	3.32772e+07	1.30888e+08	1.62702e+08	1.64109e+08	1.52567e+08	1.53397e+07	5.45774e+06	8.20308e+06	1.50302	0.587861
n/a	High	Master Protein	P35908	Keratin, type II cytoskeletal 2 epidermal [OS=Homo sapiens]		0	76	50	687	34	639	65.4	8	691.01	cell death;cell organization and biogenesis;cell proliferation;cellular component movement;metabolic process	cytoskeleton;cytosol;membrane;nucleus	protein binding;structural molecule activity	Pf00038, Pf08614, Pf12128, Pf13166	3849	ENSG00000172867.3	KRT2	12			Formation of the cornified envelope	3	267.56	0	Acetyl [N-Term]	1.6719e+08	2.00207e+08	1.95884e+08	1.8776e+08	1.46519e+07	1.42601e+08	1.88795e+08	2.03886e+08	1.78427e+08	2.60713e+07	3.63539e+09	5.43456e+09	1.4949	0.580054
n/a	High	Master Protein	P14866	Heterogeneous nuclear ribonucleoprotein L [OS=Homo sapiens]		0	20	11	111	10	589	64.1	8.22	87.5	metabolic process;regulation of biological process	cytoplasm;membrane;nucleus	DNA binding;protein binding;RNA binding	Pf00076, Pf13893, Pf14259	3191	ENSG00000282947.1; ENSG00000104824.16	HNRNPL	19; CHR_HG26_PATCH	mRNA Processing		mRNA Splicing - Major Pathway	5	35.37	0		1.42244e+08	2.07098e+08	2.0674e+08	1.85361e+08	3.04884e+07	1.00421e+08	1.68305e+08	1.6873e+08	1.45819e+08	3.21016e+07	1.9277e+06	2.87916e+06	1.49358	0.578771
n/a	High	Master Protein	Q05682-6	Isoform 6 of Caldesmon [OS=Homo sapiens]		0	17	14	96	14	563	65.6	6.62	83.96	cellular component movement	cytoskeleton;cytosol;membrane	protein binding	Pf02029	800	ENSG00000122786.19	CALD1	7	Myometrial Relaxation and Contraction Pathways			1	36.95	0		1.5571e+08	2.22064e+08	1.76317e+08	1.84697e+08	2.77296e+07	1.33783e+08	1.90024e+08	2.21432e+08	1.81746e+08	3.62578e+07	1.42687e+06	2.12514e+06	1.48938	0.57471
n/a	High	Master Protein	Q8NC51-1	Plasminogen activator inhibitor 1 RNA-binding protein [OS=Homo sapiens]		0	29	13	110	13	408	44.9	8.65	94.13	regulation of biological process	cytoplasm;cytosol;membrane;nucleus	protein binding;RNA binding	Pf04774	26135	ENSG00000142864.14	SERBP1	1	Apoptosis-related network due to altered Notch3 in ovarian cancer			1	43.22	0		1.95641e+08	1.44937e+08	2.00303e+08	1.80294e+08	2.50733e+07	1.41737e+08	1.89754e+08	1.7373e+08	1.68407e+08	1.99609e+07	5.23351e+07	7.77946e+07	1.48647	0.571891
n/a	High	Master Protein	O00410	Importin-5 [OS=Homo sapiens]		0	9	10	70	10	1097	123.6	4.94	46.87	regulation of biological process;response to stimulus;transport	cytoplasm;membrane;nucleus	enzyme regulator activity;protein binding;RNA binding;transporter activity	Pf02985, Pf12755, Pf13513, Pf13646	3843	ENSG00000065150.18	IPO5	13			vRNP Assembly	6	32.94	0		1.5968e+08	1.97138e+08	1.81192e+08	1.79337e+08	1.53484e+07	6.89442e+07	9.31018e+07	1.0078e+08	8.76086e+07	1.35649e+07	516181	767267	1.48643	0.571853
n/a	High	Master Protein	P48643	T-complex protein 1 subunit epsilon [OS=Homo sapiens]		0	29	16	80	16	541	59.6	5.66	51.06	metabolic process;regulation of biological process;response to stimulus;transport	cytoplasm;cytoskeleton;cytosol	nucleotide binding;protein binding;RNA binding	Pf00118	22948	ENSG00000150753.11	CCT5	5			BBSome-mediated cargo-targeting to cilium; Prefoldin mediated transfer of substrate to CCT/TriC; Cooperation of PDCL (PhLP1) and TRiC/CCT in G-protein beta folding; Association of TriC/CCT with target proteins during biosynthesis; Formation of tubulin folding intermediates by CCT/TriC; Folding of actin by CCT/TriC	13	35.85	0		1.43416e+08	2.12767e+08	1.76746e+08	1.77643e+08	2.83196e+07	7.69249e+07	1.17546e+08	1.26286e+08	1.06919e+08	2.1507e+07	3.22514e+06	4.783e+06	1.48303	0.568551
n/a	High	Master Protein	Q9NX63	MICOS complex subunit MIC19 [OS=Homo sapiens]		0	19	5	48	5	227	26.1	8.28	33.36	cell organization and biogenesis;metabolic process;regulation of biological process	cytoplasm;membrane;mitochondrion;nucleus	protein binding;structural molecule activity	Pf05300, Pf06747	54927	ENSG00000106554.11	CHCHD3	7			Cristae formation; Mitochondrial protein import; Metabolism of proteins	5	13.3	0		1.32591e+08	1.95965e+08	1.99071e+08	1.75876e+08	3.06329e+07	1.19322e+08	2.07811e+08	2.23556e+08	1.83563e+08	4.58779e+07	4.25426e+07	6.29187e+07	1.47896	0.564581
n/a	High	Master Protein	P22748	Carbonic anhydrase 4 [OS=Homo sapiens]		0	21	6	45	6	312	35	7.83	30.64	metabolic process;transport	cell surface;endoplasmic reticulum;Golgi;membrane	catalytic activity;metal ion binding;protein binding	Pf00194	762	ENSG00000167434.9	CA4	17		Proximal tubule bicarbonate reclamation; Nitrogen metabolism	Reversible hydration of carbon dioxide; Erythrocytes take up carbon dioxide and release oxygen; Erythrocytes take up oxygen and release carbon dioxide	8	21.64	0		1.15255e+08	1.92836e+08	2.19322e+08	1.75804e+08	4.41589e+07	1.16568e+08	1.98498e+08	1.97803e+08	1.70956e+08	3.84595e+07	511610	756260	1.47819	0.563836
n/a	High	Master Protein	Q14683	structural maintenance of chromosomes protein 1a [OS=Homo sapiens]		0	24	30	201	30	1233	143.1	7.64	148.6	cell division;cell organization and biogenesis;metabolic process;regulation of biological process;response to stimulus	chromosome;cytosol;nucleus	nucleotide binding;protein binding;RNA binding	Pf02463, Pf05262, Pf05557, Pf06470, Pf09726, Pf09731, Pf10186, Pf12128, Pf13175, Pf13304, Pf13476, Pf13555, Pf13558	8243	ENSG00000072501.17	SMC1A	X	miRNA Regulation of DNA Damage Response; Cell Cycle; Retinoblastoma (RB) in Cancer; Constitutive Androstane Receptor Pathway; Pathways Affected in Adenoid Cystic Carcinoma; ATM Signaling Network in Development and Disease; mRNA Processing; DNA Damage Response	Oocyte meiosis; Cell cycle	Meiotic synapsis; Separation of Sister Chromatids; Resolution of Sister Chromatid Cohesion; Cohesin Loading onto Chromatin; Establishment of Sister Chromatid Cohesion; SUMOylation of DNA damage response and repair proteins	30	59.03	0		1.50136e+08	1.97698e+08	1.78998e+08	1.7561e+08	1.95642e+07	1.64047e+08	1.99481e+08	2.67868e+08	2.10466e+08	4.30904e+07	1.97702e+06	2.91818e+06	1.47605	0.561741
n/a	High	Master Protein	P15153	Ras-related C3 botulinum toxin substrate 2 [OS=Homo sapiens]		0	46	10	72	6	192	21.4	7.61	45.87	cell organization and biogenesis;regulation of biological process;response to stimulus	cytoplasm;cytosol;membrane	catalytic activity;enzyme regulator activity;nucleotide binding;protein binding	Pf00025, Pf00071, Pf08477	5880	ENSG00000128340.14	RAC2	22	Integrin-mediated Cell Adhesion; RalA downstream regulated genes; B Cell Receptor Signaling Pathway; Focal Adhesion; MAPK Signaling Pathway; Chemokine signaling pathway; Microglia Pathogen Phagocytosis Pathway; Insulin Signaling; Regulation of Actin Cytoskeleton; DNA Damage Response (only ATM dependent)	Pathways in cancer; Fc gamma R-mediated phagocytosis; MAPK signaling pathway; Fc epsilon RI signaling pathway; B cell receptor signaling pathway; Regulation of actin cytoskeleton; Focal adhesion; Chemokine signaling pathway; Natural killer cell mediated cytotoxicity; Viral myocarditis; Rap1 signaling pathway; Leukocyte transendothelial migration; Pancreatic cancer; Choline metabolism in cancer; c…	G alpha (12/13) signalling events; GPVI-mediated activation cascade; Sema4D induced cell migration and growth-cone collapse; Rho GTPase cycle; PCP/CE pathway; RHO GTPases Activate NADPH Oxidases	51	16.05	0	Acetyl [N-Term]	1.31458e+08	2.04554e+08	1.8664e+08	1.74217e+08	3.11076e+07	1.00176e+08	1.67374e+08	1.70389e+08	1.45979e+08	3.24115e+07	1.23635e+07	1.81671e+07	1.46941	0.555241
n/a	High	Master Protein	P62979	Ubiquitin-40S ribosomal protein S27a [OS=Homo sapiens]		0	63	10	194	4	156	18	9.64	130.75	cell communication;cell organization and biogenesis;cellular homeostasis;defense response;metabolic process;regulation of biological process;response to stimulus;transport	cytoplasm;cytosol;membrane;nucleus;ribosome	metal ion binding;protein binding;RNA binding;structural molecule activity	Pf00240, Pf01599, Pf11976, Pf13019, Pf13881, Pf14560	6233	ENSG00000143947.13	RPS27A	2	Cytoplasmic Ribosomal Proteins	Ribosome	NOTCH1 Intracellular Domain Regulates Transcription; Activated NOTCH1 Transmits Signal to the Nucleus; Regulation of RAS by GAPs; Viral mRNA Translation; UCH proteinases; ISG15 antiviral mechanism; Regulation of PLK1 Activity at G2/M Transition; Constitutive Signaling by NOTCH1 HD+PEST Domain Mutants; Activated TLR4 signalling; Hh mutants that don't undergo autocatalytic processing are degraded b…	364	48.7	0		1.39082e+08	1.95518e+08	1.8776e+08	1.7412e+08	2.49774e+07	9.52951e+07	1.43062e+08	1.62013e+08	1.33457e+08	2.80715e+07	2.65199e+06	3.89615e+06	1.46914	0.554977
n/a	High	Master Protein	P27708	CAD protein [OS=Homo sapiens]		0	12	23	157	22	2225	242.8	6.46	95.23	metabolic process	cytoplasm;cytosol;membrane;nucleus	catalytic activity;metal ion binding;nucleotide binding;protein binding	Pf00117, Pf00185, Pf00289, Pf00988, Pf01979, Pf02142, Pf02222, Pf02729, Pf02786, Pf02787, Pf07478, Pf07722, Pf13147, Pf13535, Pf13594, Pf15632	790	ENSG00000084774.13	CAD	2	Endothelin Pathways; Amino Acid metabolism	Metabolic pathways; Pyrimidine metabolism; Alanine, aspartate and glutamate metabolism	Pyrimidine biosynthesis	9	44.54	0		1.42636e+08	1.70846e+08	2.05457e+08	1.72979e+08	2.5691e+07	8.32598e+07	1.34379e+08	1.42459e+08	1.20032e+08	2.62105e+07	1.00881e+07	1.48032e+07	1.46739	0.553251
n/a	High	Master Protein	P18077	60S ribosomal protein L35a [OS=Homo sapiens]		0.002	55	8	25	8	110	12.5	11.06	6.6	cell organization and biogenesis;metabolic process;transport	cytosol;membrane;ribosome	protein binding;RNA binding;structural molecule activity	Pf01247	6165	ENSG00000182899.14	RPL35A	3	Cytoplasmic Ribosomal Proteins	Ribosome	Peptide chain elongation; Eukaryotic Translation Termination; Viral mRNA Translation; L13a-mediated translational silencing of Ceruloplasmin expression; Nonsense Mediated Decay (NMD) independent of the Exon Junction Complex (EJC); Selenocysteine synthesis; Nonsense Mediated Decay (NMD) enhanced by the Exon Junction Complex (EJC); GTP hydrolysis and joining of the 60S ribosomal subunit; Major path…	34	9.62	0.00130548		1.94219e+08	1.09277e+08	2.09859e+08	1.71118e+08	4.4192e+07	1.52503e+08	2.15416e+08	2.11341e+08	1.93087e+08	2.87454e+07	5.89849e+06	8.65186e+06	1.46679	0.552664
n/a	High	Master Protein	P49411	elongation factor Tu, mitochondrial [OS=Homo sapiens]		0	38	14	132	14	452	49.5	7.61	109.96	metabolic process;response to stimulus	membrane;mitochondrion	catalytic activity;nucleotide binding;protein binding;RNA binding	Pf00009, Pf03143, Pf03144	7284		TUFM	16			Mitochondrial translation elongation	4	79.41	0		1.39028e+08	1.74055e+08	1.94065e+08	1.69049e+08	2.27461e+07	1.46098e+08	2.12723e+08	2.37982e+08	1.98934e+08	3.87578e+07	1.10586e+06	1.62187e+06	1.46662	0.552492
n/a	High	Master Protein	Q96PK6-1	RNA-binding protein 14 [OS=Homo sapiens]		0	28	16	168	16	669	69.4	9.67	184.76	cell organization and biogenesis;defense response;metabolic process;regulation of biological process;response to stimulus	cytoplasm;nucleus	protein binding;RNA binding	Pf00076, Pf13893, Pf14259	10432; 100526737	ENSG00000239306.4	RBM14; RBM14-RBM4	11			RUNX2 regulates bone development	5	67.18	0		1.40696e+08	1.93443e+08	1.69071e+08	1.67737e+08	2.15548e+07	1.52029e+08	2.07924e+08	2.49763e+08	2.03239e+08	4.0037e+07	887330	1.29778e+06	1.46257	0.548505
n/a	High	Master Protein	P62750	60S ribosomal protein L23a [OS=Homo sapiens]		0	56	10	89	10	156	17.7	10.45	77.43	cell organization and biogenesis;cell proliferation;metabolic process;transport	cytoplasm;cytosol;nucleus;ribosome	protein binding;RNA binding;structural molecule activity	Pf00276, Pf03939	6147	ENSG00000198242.13	RPL23A	17	Cytoplasmic Ribosomal Proteins	Ribosome	Peptide chain elongation; Eukaryotic Translation Termination; Viral mRNA Translation; L13a-mediated translational silencing of Ceruloplasmin expression; Nonsense Mediated Decay (NMD) independent of the Exon Junction Complex (EJC); Selenocysteine synthesis; Nonsense Mediated Decay (NMD) enhanced by the Exon Junction Complex (EJC); GTP hydrolysis and joining of the 60S ribosomal subunit; Major path…	34	48.35	0		1.11869e+08	1.93298e+08	1.94624e+08	1.66597e+08	3.87023e+07	1.22195e+08	2.00743e+08	2.23873e+08	1.8227e+08	4.35165e+07	1.03326e+06	1.50872e+06	1.46016	0.546124
n/a	High	Master Protein	P29692-2	Isoform 2 of Elongation factor 1-delta [OS=Homo sapiens]		0	11	8	54	6	647	71.4	6.42	37.18	metabolic process;regulation of biological process;response to stimulus	cytoplasm;cytosol;endoplasmic reticulum;nucleus	DNA binding;protein binding;RNA binding;signal transducer activity	Pf00736, Pf10587	1936	ENSG00000104529.17; ENSG00000273594.4	EEF1D	8; CHR_HSCHR8_3_CTG7	Translation Factors			1	24.69	0		1.32434e+08	1.80497e+08	1.86195e+08	1.66375e+08	2.41127e+07	6.57522e+07	1.02024e+08	1.13281e+08	9.36857e+07	2.02795e+07	1.0494e+07	1.52901e+07	1.45703	0.543029
n/a	High	Master Protein	Q14152	Eukaryotic translation initiation factor 3 subunit A [OS=Homo sapiens]		0	14	20	59	20	1382	166.5	6.79	17.19	cell organization and biogenesis;metabolic process;regulation of biological process	cytoplasm;cytosol;membrane;nucleus	protein binding;RNA binding;structural molecule activity	Pf01399	8661	ENSG00000107581.12	EIF3A	10	Translation Factors	RNA transport	Formation of the ternary complex, and subsequently, the 43S complex; L13a-mediated translational silencing of Ceruloplasmin expression; Translation initiation complex formation; GTP hydrolysis and joining of the 60S ribosomal subunit; Formation of a pool of free 40S subunits; Ribosomal scanning and start codon recognition	13	24.04	0		1.55409e+08	1.59289e+08	1.73759e+08	1.62819e+08	7.89623e+06	8.06735e+07	1.21648e+08	1.12166e+08	1.04829e+08	1.75139e+07	4.19565e+06	6.10815e+06	1.45583	0.541841
n/a	High	Master Protein	P35268	60S ribosomal protein L22 [OS=Homo sapiens]		0	41	5	74	5	128	14.8	9.19	36.48	cell organization and biogenesis;metabolic process;transport	cytoplasm;cytosol;nucleus;ribosome	protein binding;RNA binding;structural molecule activity	Pf01776	6146	ENSG00000116251.9	RPL22	1	Cytoplasmic Ribosomal Proteins	Ribosome	Peptide chain elongation; Eukaryotic Translation Termination; Viral mRNA Translation; L13a-mediated translational silencing of Ceruloplasmin expression; Nonsense Mediated Decay (NMD) independent of the Exon Junction Complex (EJC); Selenocysteine synthesis; Nonsense Mediated Decay (NMD) enhanced by the Exon Junction Complex (EJC); GTP hydrolysis and joining of the 60S ribosomal subunit; Major path…	34	13.12	0		1.34354e+08	1.64215e+08	1.84961e+08	1.61177e+08	2.07714e+07	9.49557e+07	1.75209e+08	1.66619e+08	1.45595e+08	3.59785e+07	2.3325e+07	3.39456e+07	1.45533	0.541344
n/a	High	Master Protein	Q13162	Peroxiredoxin-4 [OS=Homo sapiens]		0	41	8	54	7	271	30.5	6.29	47.44	cell organization and biogenesis;cellular homeostasis;metabolic process;regulation of biological process;transport	cytoplasm;cytosol;endoplasmic reticulum;extracellular;mitochondrion;nucleus;organelle lumen	antioxidant activity;catalytic activity;protein binding	Pf00578, Pf08534, Pf10417	10549	ENSG00000123131.12	PRDX4	X	Selenium Micronutrient Network		Neutrophil degranulation	4	39.78	0		1.50467e+08	1.40328e+08	1.86256e+08	1.59017e+08	1.97005e+07	1.22725e+08	2.18269e+08	2.23705e+08	1.88233e+08	4.63744e+07	4.91817e+08	7.15035e+08	1.45386	0.539891
n/a	High	Master Protein	P49588	Alanine--tRNA ligase, cytoplasmic [OS=Homo sapiens]		0	12	11	79	11	968	106.7	5.53	49.66	metabolic process;regulation of biological process	cytoplasm;cytosol;membrane;mitochondrion	catalytic activity;metal ion binding;nucleotide binding;RNA binding	Pf01411, Pf02272, Pf07973	16	ENSG00000090861.15	AARS	16		Aminoacyl-tRNA biosynthesis	Cytosolic tRNA aminoacylation	5	25.32	0		1.45009e+08	1.68974e+08	1.57977e+08	1.5732e+08	9.79504e+06	1.72585e+08	2.01379e+08	2.0037e+08	1.91445e+08	1.33421e+07	3.38109e+08	4.90922e+08	1.45197	0.538007
n/a	High	Master Protein	P62873	Guanine nucleotide-binding protein G(I)/G(S)/G(T) subunit beta-1 [OS=Homo sapiens]		0	26	9	139	5	340	37.4	6	86.64	cell death;cell organization and biogenesis;cell proliferation;cellular homeostasis;metabolic process;regulation of biological process;response to stimulus	cytosol;membrane	catalytic activity;protein binding;signal transducer activity	Pf00400	2782	ENSG00000078369.17	GNB1	1	Nicotine Activity on Dopaminergic Neurons; Human Thyroid Stimulating Hormone (TSH) signaling pathway; Corticotropin-releasing hormone signaling pathway; Myometrial Relaxation and Contraction Pathways; G Protein Signaling Pathways; Chemokine signaling pathway; Focal Adhesion-PI3K-Akt-mTOR-signaling pathway; Calcium Regulation in the Cardiac Cell; Estrogen signaling pathway	Dopaminergic synapse; Ras signaling pathway; Retrograde endocannabinoid signaling; Circadian entrainment; Phototransduction; Cholinergic synapse; Alcoholism; Pathways in cancer; Olfactory transduction; PI3K-Akt signaling pathway; Serotonergic synapse; Chemokine signaling pathway; GABAergic synapse; Morphine addiction; Glutamatergic synapse	G alpha (z) signalling events; Activation of G protein gated Potassium channels; Cooperation of PDCL (PhLP1) and TRiC/CCT in G-protein beta folding; Glucagon-type ligand receptors; Thromboxane signalling through TP receptor; ADP signalling through P2Y purinoceptor 1; Olfactory Signaling Pathway; G beta:gamma signalling through PI3Kgamma; Vasopressin regulates renal water homeostasis via Aquaporin…	84	35.95	0	Acetyl [N-Term]	1.28415e+08	1.70519e+08	1.67764e+08	1.55566e+08	1.92314e+07	1.08479e+08	1.78173e+08	1.75412e+08	1.54022e+08	3.22229e+07	1.07805e+06	1.56372e+06	1.4505	0.536552
n/a	High	Master Protein	Q9Y282-1	Endoplasmic reticulum-Golgi intermediate compartment protein 3 [OS=Homo sapiens]		0.001	11	5	26	5	383	43.2	6.06	13.22	transport	endoplasmic reticulum;Golgi;membrane		Pf07970, Pf13850	51614	ENSG00000125991.19	ERGIC3	20				0	10.98	0.00144092		1.32737e+08	1.68926e+08	1.6243e+08	1.54698e+08	1.57534e+07	1.59087e+08	2.54544e+08	2.90057e+08	2.34563e+08	5.53036e+07	3.67106e+07	5.32455e+07	1.45041	0.536464
n/a	High	Master Protein	P04406-1	glyceraldehyde-3-phosphate dehydrogenase [OS=Homo sapiens]		0	74	20	248	20	335	36	8.46	281.77	cell death;cell organization and biogenesis;defense response;metabolic process;regulation of biological process;response to stimulus	cytoplasm;cytoskeleton;cytosol;membrane;nucleus	catalytic activity;enzyme regulator activity;nucleotide binding;protein binding	Pf00044, Pf02800	2597	ENSG00000111640.14	GAPDH	12	Cori Cycle; Alzheimers Disease; Glycolysis and Gluconeogenesis; Sudden Infant Death Syndrome (SIDS) Susceptibility Pathways	Alzheimer's disease; Glycolysis / Gluconeogenesis; HIF-1 signaling pathway; Metabolic pathways; Biosynthesis of amino acids; Carbon metabolism	Gluconeogenesis; Glycolysis	15	167.36	0		1.17028e+08	1.84072e+08	1.5895e+08	1.5335e+08	2.76555e+07	6.74402e+07	1.25663e+08	1.32942e+08	1.08682e+08	2.93131e+07	3.98238e+06	5.77424e+06	1.44995	0.536001
n/a	High	Master Protein	P31146	Coronin-1A [OS=Homo sapiens]		0	40	27	273	26	461	51	6.68	167.48	cell organization and biogenesis;cellular component movement;defense response;regulation of biological process;response to stimulus;transport	cytoplasm;cytoskeleton;cytosol;endosome;membrane;nucleus	protein binding;RNA binding	Pf00400, Pf08953, Pf08954, Pf13094, Pf13863	11151	ENSG00000102879.15	CORO1A	16		Phagosome; Tuberculosis		2	92.02	0		1.59269e+08	1.30599e+08	1.65839e+08	1.51902e+08	1.53006e+07	1.27775e+08	1.83066e+08	1.57657e+08	1.56166e+08	2.25968e+07	3.09776e+07	4.47406e+07	1.44429	0.53036
n/a	High	Master Protein	P21291	Cysteine and glycine-rich protein 1 [OS=Homo sapiens]		0	58	12	146	12	193	20.6	8.57	213.21		nucleus	metal ion binding;RNA binding	Pf00412	1465	ENSG00000159176.13	CSRP1	1	Mecp2 and Associated Rett Syndrome		MTF1 activates gene expression	4	79.25	0		1.47872e+08	1.59747e+08	1.48032e+08	1.51884e+08	5.5607e+06	1.35909e+08	1.82429e+08	1.60169e+08	1.59502e+08	1.89978e+07	3.12804e+06	4.51361e+06	1.44295	0.529022
n/a	High	Master Protein	Q14118	Dystroglycan [OS=Homo sapiens]		0	9	7	38	7	895	97.4	8.56	21.12	cell differentiation;cell organization and biogenesis;cellular component movement;metabolic process;regulation of biological process;response to stimulus;transport	cytoplasm;cytoskeleton;cytosol;extracellular;membrane;nucleus;organelle lumen	metal ion binding;protein binding;receptor activity;structural molecule activity	Pf05454	1605	ENSG00000173402.11	DAG1	3	Integrated Breast Cancer Pathway; Arrhythmogenic Right Ventricular Cardiomyopathy; Primary Focal Segmental Glomerulosclerosis FSGS	Viral myocarditis; Hypertrophic cardiomyopathy (HCM); Arrhythmogenic right ventricular cardiomyopathy (ARVC); Dilated cardiomyopathy; ECM-receptor interaction	ECM proteoglycans; Integrin cell surface interactions; Defective POMT1 causes MDDGA1, MDDGB1 and MDDGC1; Defective POMGNT1 causes MDDGA3, MDDGB3 and MDDGC3; Defective POMT2 causes MDDGA2, MDDGB2 and MDDGC2; Regulation of expression of SLITs and ROBOs; O-linked glycosylation; Non-integrin membrane-ECM interactions	25	15.54	0		1.35175e+08	1.65224e+08	1.54755e+08	1.51718e+08	1.24538e+07	7.28089e+07	1.08439e+08	1.02347e+08	9.45318e+07	1.55605e+07	2.85725e+07	4.12141e+07	1.44244	0.528512
n/a	High	Master Protein	P18206-2	Isoform 1 of Vinculin [OS=Homo sapiens]		0	22	23	170	23	1066	116.6	6.09	122.41	cell growth;cell organization and biogenesis;cellular component movement;regulation of biological process;transport	cytoskeleton;cytosol;extracellular;membrane;organelle lumen	protein binding;structural molecule activity	Pf01044	7414	ENSG00000035403.17	VCL	10	Integrin-mediated Cell Adhesion; Primary Focal Segmental Glomerulosclerosis FSGS; Focal Adhesion; VEGFA-VEGFR2 Signaling Pathway; Regulation of Actin Cytoskeleton			5	52.8	0		1.2623e+08	1.76697e+08	1.4857e+08	1.50499e+08	2.06479e+07	7.9729e+07	1.17225e+08	1.14723e+08	1.03892e+08	1.71166e+07	2.96319e+06	4.27287e+06	1.44198	0.528053
n/a	High	Master Protein	P04843	Dolichyl-diphosphooligosaccharide--protein glycosyltransferase subunit 1 [OS=Homo sapiens]		0	22	15	89	15	607	68.5	6.38	35.21	metabolic process	cytosol;endoplasmic reticulum;membrane	catalytic activity;protein binding;RNA binding	Pf04597	6184	ENSG00000163902.11	RPN1	3	Proteasome Degradation	Protein processing in endoplasmic reticulum; Metabolic pathways; N-Glycan biosynthesis	Asparagine N-linked glycosylation; SRP-dependent cotranslational protein targeting to membrane	9	27.1	0		1.30319e+08	1.5246e+08	1.67761e+08	1.5018e+08	1.53704e+07	1.16799e+08	1.97397e+08	1.85965e+08	1.6672e+08	3.5607e+07	1.04943e+06	1.51302e+06	1.44176	0.527828
n/a	High	Master Protein	P10809	60 kDa heat shock protein, mitochondrial [OS=Homo sapiens]		0	35	20	187	20	573	61	5.87	144.93	cell organization and biogenesis;cell proliferation;metabolic process;regulation of biological process;response to stimulus;transport	cell surface;cytoplasm;cytosol;endosome;membrane;mitochondrion;organelle lumen	catalytic activity;DNA binding;nucleotide binding;protein binding;RNA binding	Pf00118	3329	ENSG00000144381.16	HSPD1	2	Apoptosis-related network due to altered Notch3 in ovarian cancer; Sudden Infant Death Syndrome (SIDS) Susceptibility Pathways	RNA degradation; Legionellosis; Type I diabetes mellitus; Tuberculosis	TFAP2A acts as a transcriptional repressor during retinoic acid induced cell differentiation; Mitochondrial protein import; Metabolism of proteins	13	73.48	0		1.36071e+08	1.47842e+08	1.64777e+08	1.49564e+08	1.17822e+07	1.0939e+08	1.73235e+08	1.81485e+08	1.54703e+08	3.22181e+07	1.73505e+06	2.4979e+06	1.43967	0.525736
n/a	High	Master Protein	P61158	actin-related protein 3 [OS=Homo sapiens]		0	45	16	154	16	418	47.3	5.88	137.36	cell division;cell organization and biogenesis;cellular component movement;regulation of biological process;response to stimulus	cytoplasm;cytoskeleton;cytosol;membrane	nucleotide binding;protein binding;structural molecule activity	Pf00022	10096	ENSG00000115091.11	ACTR3	2	Association Between Physico-Chemical Features and Toxicity Associated Pathways		EPHB-mediated forward signaling; Clathrin-mediated endocytosis; RHO GTPases Activate WASPs and WAVEs; Regulation of actin dynamics for phagocytic cup formation	16	68.33	0	Acetyl [N-Term]	1.21796e+08	1.65685e+08	1.55376e+08	1.47619e+08	1.87384e+07	1.10517e+08	1.75954e+08	1.86233e+08	1.57568e+08	3.35339e+07	5.24413e+06	7.53557e+06	1.43695	0.523014
n/a	High	Master Protein	O60313-2	Isoform 2 of Dynamin-like 120 kDa protein, mitochondrial [OS=Homo sapiens]		0	14	14	87	14	997	115.8	7.87	49.43	cell death;cell organization and biogenesis;cellular component movement;cellular homeostasis;metabolic process;regulation of biological process;response to stimulus;transport	cytosol;membrane;mitochondrion	catalytic activity;metal ion binding;nucleotide binding;protein binding	Pf00350, Pf01926	4976	ENSG00000198836.8	OPA1	3				0	28.04	0		1.22441e+08	1.60315e+08	1.59225e+08	1.47327e+08	1.76027e+07	1.01748e+08	1.48315e+08	1.56469e+08	1.35511e+08	2.41047e+07	833021	1.19695e+06	1.43688	0.522936
n/a	High	Master Protein	P62633-1	Cellular nucleic acid-binding protein [OS=Homo sapiens]		0	45	7	73	1	177	19.5	7.71	79.81	metabolic process;regulation of biological process	cytoplasm;cytosol;endoplasmic reticulum;nucleus	DNA binding;metal ion binding;protein binding;RNA binding	Pf00098	7555	ENSG00000169714.16	CNBP	3				0	57.66	0		1.34622e+08	1.64524e+08	1.42045e+08	1.47064e+08	1.27129e+07	1.35322e+08	1.72306e+08	1.82377e+08	1.63335e+08	2.02303e+07	1.55603e+07	2.23561e+07	1.43674	0.522798
n/a	High	Master Protein	Q9UM54-6	Isoform 6 of Unconventional myosin-VI [OS=Homo sapiens]		0	15	18	94	18	1285	148.6	8.56	41.56	cellular component movement;regulation of biological process;response to stimulus;transport	cytoplasm;cytosol;Golgi;membrane;nucleus	catalytic activity;motor activity;nucleotide binding;protein binding	Pf00063, Pf00529	4646		MYO6	6	VEGFA-VEGFR2 Signaling Pathway			1	46.28	0		1.28266e+08	1.5939e+08	1.48141e+08	1.45266e+08	1.28679e+07	9.07791e+07	1.42643e+08	1.61471e+08	1.31631e+08	2.98919e+07	2.41014e+07	3.45364e+07	1.43296	0.519001
n/a	High	Master Protein	P08195-2	Isoform 2 of 4F2 cell-surface antigen heavy chain [OS=Homo sapiens]		0	15	9	36	9	529	57.9	5.35	20.45	cell growth;cellular component movement;metabolic process;response to stimulus;transport	cell surface;cytosol;membrane;nucleus	catalytic activity;protein binding;RNA binding;transporter activity	Pf00128	6520	ENSG00000168003.16	SLC3A2	11				0	19.88	0	Acetyl [N-Term]	1.09724e+08	1.71692e+08	1.53513e+08	1.44977e+08	2.60086e+07	8.33567e+07	1.43142e+08	1.51222e+08	1.25907e+08	3.02679e+07	5.88488e+06	8.41627e+06	1.43015	0.516169
n/a	High	Master Protein	P18124	60S ribosomal protein L7 [OS=Homo sapiens]		0	36	11	126	11	248	29.2	10.65	154.35	cell organization and biogenesis;metabolic process;transport	cytoplasm;cytosol;membrane;nucleus;ribosome	DNA binding;protein binding;RNA binding;structural molecule activity	Pf00327, Pf08079	6129	ENSG00000147604.13	RPL7	8	Cytoplasmic Ribosomal Proteins	Ribosome	Peptide chain elongation; Eukaryotic Translation Termination; Viral mRNA Translation; L13a-mediated translational silencing of Ceruloplasmin expression; Nonsense Mediated Decay (NMD) independent of the Exon Junction Complex (EJC); Selenocysteine synthesis; Nonsense Mediated Decay (NMD) enhanced by the Exon Junction Complex (EJC); GTP hydrolysis and joining of the 60S ribosomal subunit; Major path…	34	47.11	0		1.13966e+08	1.68639e+08	1.51793e+08	1.44799e+08	2.28615e+07	1.03948e+08	1.57411e+08	1.7262e+08	1.4466e+08	2.94495e+07	2.73595e+06	3.90919e+06	1.42882	0.514824
n/a	High	Master Protein	Q01518-1	adenylyl cyclase-associated protein 1 [OS=Homo sapiens]		0	45	20	193	20	475	51.9	8.06	110.32	cell organization and biogenesis;cellular component movement;regulation of biological process;response to stimulus;transport	cytoplasm;cytoskeleton;extracellular;membrane;organelle lumen	protein binding	Pf01213, Pf07986, Pf08603	10487	ENSG00000131236.16	CAP1	1	Angiopoietin Like Protein 8 Regulatory Pathway; Insulin Signaling		Platelet degranulation ; Neutrophil degranulation; Role of ABL in ROBO-SLIT signaling	13	52.11	0	Acetyl [N-Term]	1.32941e+08	1.4914e+08	1.50294e+08	1.44125e+08	7.92194e+06	8.47602e+07	1.30747e+08	1.46479e+08	1.20662e+08	2.61863e+07	6.56641e+06	9.37634e+06	1.42792	0.513918
n/a	High	Master Protein	P11279-2	Isoform 2 of Lysosome-associated membrane glycoprotein 1 [OS=Homo sapiens]		0	5	2	38	2	364	39	8.87	33.57	cell death;regulation of biological process;response to stimulus;transport	cytoplasm;cytosol;endosome;membrane;vacuole	protein binding;receptor activity	Pf01299	3916		LAMP1	13	Senescence and Autophagy in Cancer			1	8.45	0.00118765		1.11599e+08	1.66842e+08	1.53571e+08	1.44004e+08	2.3546e+07	6.03778e+07	9.8432e+07	1.09815e+08	8.95415e+07	2.1139e+07	8.94027e+07	1.27589e+08	1.42713	0.513115
n/a	High	Master Protein	P63167	Dynein light chain 1, cytoplasmic [OS=Homo sapiens]		0.001	35	5	46	5	89	10.4	7.4	14.12	cell communication;cell death;cell organization and biogenesis;cellular component movement;metabolic process;regulation of biological process;response to stimulus;transport	chromosome;cytoplasm;cytoskeleton;cytosol;membrane;mitochondrion;nucleus	catalytic activity;motor activity;protein binding	Pf01221	8655	ENSG00000088986.10	DYNLL1	12		Vasopressin-regulated water reabsorption	COPI-independent Golgi-to-ER retrograde traffic; Regulation of PLK1 Activity at G2/M Transition; Recruitment of NuMA to mitotic centrosomes; Loss of Nlp from mitotic centrosomes; Neutrophil degranulation; Separation of Sister Chromatids; COPI-mediated anterograde transport; HSP90 chaperone cycle for steroid hormone receptors (SHR); AURKA Activation by TPX2; Anchoring of the basal body to the plas…	55	12.54	0		1.20956e+08	1.56375e+08	1.53583e+08	1.43638e+08	1.60789e+07	1.16463e+08	1.91922e+08	1.9714e+08	1.68508e+08	3.68633e+07	1.97373e+07	2.81612e+07	1.4268	0.512784
n/a	High	Master Protein	Q92896	Golgi apparatus protein 1 [OS=Homo sapiens]		0	13	17	151	17	1179	134.5	6.9	152.63	cellular component movement;regulation of biological process	Golgi;membrane	protein binding	Pf00839	2734	ENSG00000090863.11	GLG1	16		Cell adhesion molecules (CAMs)	Cell surface interactions at the vascular wall	3	63.17	0		1.33735e+08	1.32654e+08	1.56618e+08	1.41002e+08	1.1051e+07	9.69615e+07	1.51028e+08	1.59142e+08	1.35711e+08	2.75993e+07	1.75483e+07	2.50327e+07	1.4265	0.512483
n/a	High	Master Protein	Q24JP5	Transmembrane protein 132A [OS=Homo sapiens]		0.001	3	3	28	2	1023	110	5.62	14.1	metabolic process	endoplasmic reticulum;Golgi;membrane;organelle lumen			54972	ENSG00000006118.14	TMEM132A	11			Post-translational protein phosphorylation; Regulation of Insulin-like Growth Factor (IGF) transport and uptake by Insulin-like Growth Factor Binding Proteins (IGFBPs)	4	15.34	0		1.13697e+08	1.69052e+08	1.392e+08	1.4065e+08	2.26215e+07	4.44725e+07	7.47339e+07	7.4945e+07	6.47171e+07	1.43154e+07	3.86805e+06	5.50905e+06	1.42424	0.510197
n/a	High	Master Protein	P07237	Protein disulfide-isomerase [OS=Homo sapiens]		0	46	27	231	27	508	57.1	4.87	158.59	cell organization and biogenesis;cellular homeostasis;metabolic process;regulation of biological process;response to stimulus	endoplasmic reticulum;extracellular;membrane;organelle lumen	catalytic activity;metal ion binding;protein binding;RNA binding	Pf00085, Pf01216, Pf13098, Pf13848, Pf13899, Pf13905	5034	ENSG00000185624.14	P4HB	17		Protein processing in endoplasmic reticulum	Post-translational protein phosphorylation; Regulation of Insulin-like Growth Factor (IGF) transport and uptake by Insulin-like Growth Factor Binding Proteins (IGFBPs); VLDL assembly; Chylomicron assembly; Collagen biosynthesis and modifying enzymes; Interleukin-12 family signaling; Detoxification of Reactive Oxygen Species; Hedgehog ligand biogenesis	23	69.72	0		1.01179e+08	1.87733e+08	1.32668e+08	1.40527e+08	3.57697e+07	2.69411e+08	3.96593e+08	4.28806e+08	3.64937e+08	6.88154e+07	1.6839e+06	2.39527e+06	1.42245	0.508381
n/a	High	Master Protein	P62753	40S RIBOSOMAL PROTEIN S6 [OS=Homo sapiens]		0.001	22	6	40	6	249	28.7	10.84	14.18	cell death;cell differentiation;cell organization and biogenesis;cell proliferation;metabolic process;regulation of biological process;response to stimulus;transport	cytoplasm;cytosol;membrane;nucleus;ribosome	protein binding;RNA binding;structural molecule activity	Pf01092	6194	ENSG00000137154.12	RPS6	9	IL-5 Signaling Pathway; Human Thyroid Stimulating Hormone (TSH) signaling pathway; Leptin signaling pathway; Follicle Stimulating Hormone (FSH) signaling pathway; Prolactin Signaling Pathway; Interleukin-11 Signaling Pathway; Oncostatin M Signaling Pathway; Brain-Derived Neurotrophic Factor (BDNF) signaling pathway; Kit receptor signaling pathway; Mecp2 and Associated Rett Syndrome; VEGFA-VEGFR2 …	mTOR signaling pathway; HIF-1 signaling pathway; PI3K-Akt signaling pathway; EGFR tyrosine kinase inhibitor resistance; Ribosome; Proteoglycans in cancer; Insulin signaling pathway	Peptide chain elongation; Eukaryotic Translation Termination; Viral mRNA Translation; mTORC1-mediated signalling; Formation of the ternary complex, and subsequently, the 43S complex; L13a-mediated translational silencing of Ceruloplasmin expression; Selenocysteine synthesis; Nonsense Mediated Decay (NMD) independent of the Exon Junction Complex (EJC); Nonsense Mediated Decay (NMD) enhanced by the…	62	9.32	0.00127877		1.01726e+08	1.66573e+08	1.52503e+08	1.40267e+08	2.78514e+07	8.68293e+07	1.31026e+08	1.49144e+08	1.22333e+08	2.61719e+07	4.49481e+07	6.39042e+07	1.42173	0.507652
n/a	High	Master Protein	P00338-1	L-lactate dehydrogenase A chain [OS=Homo sapiens]		0	34	12	139	11	332	36.7	8.27	135.44	metabolic process;regulation of biological process;response to stimulus	cytoplasm;cytosol;membrane;nucleus	catalytic activity;nucleotide binding;protein binding	Pf00056, Pf02866	3939	ENSG00000134333.13	LDHA	11	Cori Cycle; Photodynamic therapy-induced HIF-1 survival signaling; Amino Acid metabolism; Glycolysis and Gluconeogenesis	Metabolic pathways; Pyruvate metabolism; Propanoate metabolism; Glycolysis / Gluconeogenesis; Central carbon metabolism in cancer; Cysteine and methionine metabolism; Glucagon signaling pathway; HIF-1 signaling pathway	Pyruvate metabolism	16	33.49	0		1.12811e+08	1.60144e+08	1.46353e+08	1.39769e+08	1.98763e+07	7.414e+07	1.26698e+08	1.26208e+08	1.09015e+08	2.46613e+07	8.42368e+08	1.19681e+09	1.42077	0.506669
n/a	High	Master Protein	Q969Q0	60S ribosomal protein L36a-like [OS=Homo sapiens]		0	23	4	67	4	106	12.5	10.65	49.07	metabolic process	cytoplasm;cytosol;membrane;nucleus;ribosome	protein binding;structural molecule activity	Pf00935	6166	ENSG00000165502.6	RPL36AL	14		Ribosome	Peptide chain elongation; Eukaryotic Translation Termination; Viral mRNA Translation; L13a-mediated translational silencing of Ceruloplasmin expression; Nonsense Mediated Decay (NMD) independent of the Exon Junction Complex (EJC); Selenocysteine synthesis; Nonsense Mediated Decay (NMD) enhanced by the Exon Junction Complex (EJC); GTP hydrolysis and joining of the 60S ribosomal subunit; Major path…	33	16.04	0		1.09495e+08	1.6757e+08	1.41824e+08	1.3963e+08	2.376e+07	8.78515e+07	1.30324e+08	1.42374e+08	1.20183e+08	2.33853e+07	1.54313e+06	2.19187e+06	1.4204	0.506302
n/a	High	Master Protein	P07900-2	Isoform 2 of Heat shock protein HSP 90-alpha [OS=Homo sapiens]		0	37	32	250	17	854	98.1	5.16	249.9	cell organization and biogenesis;metabolic process;regulation of biological process;response to stimulus;transport	cytoplasm;cytosol;extracellular;membrane;nucleus;organelle lumen	catalytic activity;enzyme regulator activity;nucleotide binding;protein binding;RNA binding	Pf00183, Pf02518, Pf13589	3320	ENSG00000080824.18	HSP90AA1	14	Nucleotide-binding Oligomerization Domain (NOD) pathway; TNF alpha Signaling Pathway; Corticotropin-releasing hormone signaling pathway; Aryl Hydrocarbon Receptor; EBV LMP1 signaling; Aryl Hydrocarbon Receptor Pathway; Constitutive Androstane Receptor Pathway; NRF2 pathway; VEGFA-VEGFR2 Signaling Pathway; Focal Adhesion-PI3K-Akt-mTOR-signaling pathway			10	67.09	0		1.13422e+08	1.47874e+08	1.53479e+08	1.38258e+08	1.77107e+07	5.74319e+07	9.7314e+07	9.94168e+07	8.47209e+07	1.93153e+07	1.99696e+06	2.82853e+06	1.41642	0.502247
n/a	High	Master Protein	P08648	Integrin alpha-5 [OS=Homo sapiens]		0	8	7	66	7	1049	114.5	5.77	40.93	cell differentiation;cell organization and biogenesis;cellular component movement;regulation of biological process;response to stimulus	cell surface;cytoplasm;endoplasmic reticulum;Golgi;membrane	metal ion binding;protein binding;receptor activity	Pf01839, Pf08441	3678	ENSG00000161638.10	ITGA5	12	Integrin-mediated Cell Adhesion; Arrhythmogenic Right Ventricular Cardiomyopathy; Focal Adhesion; Focal Adhesion-PI3K-Akt-mTOR-signaling pathway	Hypertrophic cardiomyopathy (HCM); Proteoglycans in cancer; MicroRNAs in cancer; ECM-receptor interaction; Phagosome; Dilated cardiomyopathy; Regulation of actin cytoskeleton; Focal adhesion; Shigellosis; Pertussis; PI3K-Akt signaling pathway; Hematopoietic cell lineage; Bacterial invasion of epithelial cells; Arrhythmogenic right ventricular cardiomyopathy (ARVC)	RUNX2 regulates genes involved in cell migration; Integrin cell surface interactions; Signal transduction by L1; Elastic fibre formation; Fibronectin matrix formation; Cell surface interactions at the vascular wall	33	22.89	0		1.03663e+08	1.57429e+08	1.52855e+08	1.37982e+08	2.43393e+07	6.13298e+07	1.03494e+08	1.83769e+08	1.16197e+08	5.07862e+07	749626	1.06171e+06	1.41632	0.502144
n/a	High	Master Protein	P07910-2	Isoform C1 of Heterogeneous nuclear ribonucleoproteins C1/C2 [OS=Homo sapiens]		0	33	9	88	9	293	32.3	5.08	52.09	cell differentiation;cell organization and biogenesis;metabolic process;regulation of biological process	cytoskeleton;cytosol;extracellular;membrane;nucleus;spliceosomal complex	DNA binding;protein binding;RNA binding	Pf00076, Pf13893, Pf14259	3183	ENSG00000092199.17	HNRNPC	14	mRNA Processing			1	36.39	0	Acetyl [N-Term]	1.03745e+08	1.44222e+08	1.61595e+08	1.36521e+08	2.4237e+07	8.23726e+07	1.53968e+08	1.65771e+08	1.34037e+08	3.68488e+07	8.17222e+07	1.15568e+08	1.41416	0.499946
n/a	High	Master Protein	P04899-1	guanine nucleotide-binding protein G(i) subunit alpha-2 [OS=Homo sapiens]		0	52	17	192	13	355	40.4	5.54	158.7	cell division;cell proliferation;metabolic process;regulation of biological process;response to stimulus	cytoplasm;cytoskeleton;cytosol;membrane;nucleus	catalytic activity;metal ion binding;nucleotide binding;protein binding;signal transducer activity	Pf00025, Pf00503	2771	ENSG00000114353.16	GNAI2	3	Human Thyroid Stimulating Hormone (TSH) signaling pathway; Corticotropin-releasing hormone signaling pathway; Signal Transduction of S1P Receptor; G Protein Signaling Pathways; Chemokine signaling pathway; Calcium Regulation in the Cardiac Cell	cGMP-PKG signaling pathway; Leukocyte transendothelial migration; Dopaminergic synapse; Toxoplasmosis; Cholinergic synapse; Pathways in cancer; Axon guidance; Rap1 signaling pathway; Sphingolipid signaling pathway; Tight junction; Long-term depression; Adrenergic signaling in cardiomyocytes; Estrogen signaling pathway; Circadian entrainment; Alcoholism; Chagas disease (American trypanosomiasis); …	G alpha (z) signalling events; Cooperation of PDCL (PhLP1) and TRiC/CCT in G-protein beta folding; G alpha (s) signalling events; PLC beta mediated events; ADP signalling through P2Y purinoceptor 12; Adrenaline,noradrenaline inhibits insulin secretion; Adenylate cyclase inhibitory pathway; G-protein activation	70	62.13	0		1.18844e+08	1.26669e+08	1.56138e+08	1.33884e+08	1.60573e+07	1.03197e+08	1.63857e+08	1.5835e+08	1.41801e+08	2.73902e+07	9.09088e+06	1.28454e+07	1.413	0.49876
n/a	High	Master Protein	P05109	Protein S100-A8 [OS=Homo sapiens]		0	76	12	203	12	93	10.8	7.03	127.8	cell death;cellular component movement;defense response;metabolic process;regulation of biological process;response to stimulus;transport	cytoplasm;cytoskeleton;cytosol;extracellular;membrane;nucleus;organelle lumen	metal ion binding;protein binding	Pf01023, Pf13499	6279	ENSG00000143546.9	S100A8	1			Neutrophil degranulation; Metal sequestration by antimicrobial proteins; Regulation of TLR by endogenous ligand	7	54.65	0		1.0318e+08	1.51085e+08	1.47218e+08	1.33827e+08	2.17287e+07	8.32853e+07	1.30862e+08	1.42787e+08	1.18978e+08	2.5704e+07	1.00083e+07	1.41308e+07	1.41191	0.497643
n/a	High	Master Protein	Q8WVV9	Heterogeneous nuclear ribonucleoprotein L-like [OS=Homo sapiens]		0	27	12	74	11	542	60	7.72	70.36	metabolic process;regulation of biological process	membrane;nucleus	protein binding;RNA binding	Pf00076, Pf13893, Pf14259	92906	ENSG00000143889.15	HNRNPLL; HNRPLL	2				0	29.11	0		1.19093e+08	1.47012e+08	1.35323e+08	1.33809e+08	1.14481e+07	4.4908e+07	6.5787e+07	7.49548e+07	6.18833e+07	1.25733e+07	2.91951e+06	4.11992e+06	1.41117	0.49689
n/a	High	Master Protein	P02765	Alpha-2-HS-glycoprotein [OS=Homo sapiens]		0	21	8	103	8	367	39.3	5.72	97.71	defense response;metabolic process;regulation of biological process;response to stimulus;transport	extracellular;Golgi;organelle lumen	enzyme regulator activity	Pf00031	197		AHSG	3			Platelet degranulation ; Post-translational protein phosphorylation; Regulation of Insulin-like Growth Factor (IGF) transport and uptake by Insulin-like Growth Factor Binding Proteins (IGFBPs); Neutrophil degranulation	11	32.03	0		1.45462e+08	1.23579e+08	1.25396e+08	1.31479e+08	9.91508e+06	2.97926e+08	3.47216e+08	2.56786e+08	3.00643e+08	3.69681e+07	6.41745e+06	9.04124e+06	1.40885	0.49452
n/a	High	Master Protein	Q92598	Heat shock protein 105 kDa [OS=Homo sapiens]		0	14	12	80	12	858	96.8	5.39	33.06	metabolic process;regulation of biological process;response to stimulus;transport	cytoplasm;cytosol;extracellular;nucleus;organelle lumen	enzyme regulator activity;nucleotide binding;protein binding	Pf00012	10808	ENSG00000120694.19	HSPH1	13		Protein processing in endoplasmic reticulum	Scavenging by Class F Receptors; Regulation of HSF1-mediated heat shock response	8	29.56	0	Acetyl [N-Term]	1.23742e+08	1.29544e+08	1.39977e+08	1.31088e+08	6.71689e+06	7.40975e+07	1.18634e+08	1.21252e+08	1.04661e+08	2.16382e+07	3.03763e+06	4.27661e+06	1.40788	0.493521
n/a	High	Master Protein	P38159-1	RNA-binding motif protein, X chromosome [OS=Homo sapiens]		0	24	10	95	10	391	42.3	10.05	53.73	cell differentiation;cell organization and biogenesis;metabolic process;regulation of biological process;response to stimulus	membrane;nucleus;spliceosomal complex	DNA binding;protein binding;RNA binding	Pf00076, Pf08081, Pf13893, Pf14259	27316	ENSG00000147274.14	RBMX	X	mRNA Processing	Spliceosome	mRNA Splicing - Major Pathway	6	31.23	0	Acetyl [N-Term]	1.35362e+08	1.06528e+08	1.50053e+08	1.30648e+08	1.80792e+07	1.25697e+08	1.53825e+08	1.38897e+08	1.39473e+08	1.14903e+07	3.26128e+06	4.59104e+06	1.40774	0.493384
n/a	High	Master Protein	Q9Y6M1-1	Isoform 2 of Insulin-like growth factor 2 mRNA-binding protein 2 [OS=Homo sapiens]		0	27	13	64	13	556	61.8	8.25	21.85	regulation of biological process;transport	cytoplasm;cytoskeleton;cytosol;nucleus	protein binding;RNA binding;translation regulator activity	Pf00013, Pf00076, Pf13014, Pf13893, Pf14259	10644	ENSG00000073792.15	IGF2BP2	3				0	30.12	0		1.03572e+08	1.53263e+08	1.34635e+08	1.3049e+08	2.04967e+07	1.04385e+08	1.53163e+08	1.417e+08	1.33083e+08	2.08252e+07	5.66731e+06	7.97736e+06	1.40761	0.493247
n/a	High	Master Protein	P17096-2	Isoform HMG-Y of High mobility group protein HMG-I/HMG-Y [OS=Homo sapiens]		0	34	4	57	1	96	10.7	10.32	59.59	cell organization and biogenesis;metabolic process;regulation of biological process;response to stimulus;transport	chromosome;cytosol;nucleus	catalytic activity;DNA binding;protein binding		3159	ENSG00000137309.19	HMGA1	6	Adipogenesis; Preimplantation Embryo; Senescence and Autophagy in Cancer			3	25.64	0		1.19836e+08	1.42186e+08	1.28832e+08	1.30285e+08	9.18189e+06	1.05004e+08	1.30687e+08	1.3489e+08	1.23527e+08	1.32094e+07	3.64505e+07	5.11864e+07	1.40427	0.489821
n/a	High	Master Protein	P62888	60S ribosomal protein L30 [OS=Homo sapiens]		0	63	6	79	6	115	12.8	9.63	89.84	cell organization and biogenesis;defense response;metabolic process;response to stimulus;transport	cytosol;membrane;nucleus;ribosome	protein binding;RNA binding;structural molecule activity	Pf01248	6156	ENSG00000156482.10	RPL30	8	Selenium Metabolism and Selenoproteins; Cytoplasmic Ribosomal Proteins	Ribosome	Peptide chain elongation; Eukaryotic Translation Termination; Viral mRNA Translation; L13a-mediated translational silencing of Ceruloplasmin expression; Nonsense Mediated Decay (NMD) independent of the Exon Junction Complex (EJC); Selenocysteine synthesis; Nonsense Mediated Decay (NMD) enhanced by the Exon Junction Complex (EJC); GTP hydrolysis and joining of the 60S ribosomal subunit; Major path…	35	20.27	0		1.05838e+08	1.50172e+08	1.32568e+08	1.29526e+08	1.82266e+07	7.93491e+07	1.21798e+08	1.26313e+08	1.09153e+08	2.11553e+07	1.16081e+07	1.62913e+07	1.40344	0.488972
n/a	High	Master Protein	Q92945	Far upstream element-binding protein 2 [OS=Homo sapiens]		0	17	10	97	10	711	73.1	7.3	83.79	metabolic process;regulation of biological process;response to stimulus;transport	cytoplasm;cytosol;membrane;nucleus	DNA binding;protein binding;RNA binding	Pf00013, Pf07650, Pf09005, Pf13014	8570	ENSG00000088247.17	KHSRP	19	Preimplantation Embryo		ATF4 activates genes; KSRP (KHSRP) binds and destabilizes mRNA	8	33.11	0		1.01562e+08	1.49634e+08	1.33616e+08	1.2827e+08	1.9986e+07	1.11294e+08	1.96475e+08	1.85262e+08	1.64344e+08	3.77903e+07	1.372e+07	1.91602e+07	1.39652	0.481836
n/a	High	Master Protein	Q9UQE7	Structural maintenance of chromosomes protein 3 [OS=Homo sapiens]		0	25	32	138	32	1217	141.5	7.18	110.77	cell division;cell organization and biogenesis;metabolic process;regulation of biological process;response to stimulus;transport	chromosome;cytosol;nucleus	catalytic activity;motor activity;nucleotide binding;protein binding;transporter activity	Pf01496, Pf02463, Pf04111, Pf06470, Pf10168, Pf12128, Pf13304, Pf13476, Pf13555	9126	ENSG00000108055.9	SMC3	10	Retinoblastoma (RB) in Cancer; Mecp2 and Associated Rett Syndrome	Oocyte meiosis; Cell cycle	Meiotic synapsis; Separation of Sister Chromatids; Resolution of Sister Chromatid Cohesion; Cohesin Loading onto Chromatin; Establishment of Sister Chromatid Cohesion; SUMOylation of DNA damage response and repair proteins	24	64.37	0		1.12706e+08	1.41628e+08	1.30141e+08	1.28158e+08	1.18902e+07	1.09232e+08	1.48363e+08	1.49242e+08	1.35612e+08	1.86572e+07	9.81068e+06	1.36809e+07	1.39449	0.479742
n/a	High	Master Protein	P62249	40S ribosomal protein S16 [OS=Homo sapiens]		0.001	27	4	19	4	146	16.4	10.21	11.23	cell organization and biogenesis;metabolic process;transport	cytosol;membrane;ribosome	protein binding;RNA binding;structural molecule activity	Pf00380	6217	ENSG00000105193.8	RPS16	19	Cytoplasmic Ribosomal Proteins	Ribosome	Peptide chain elongation; Eukaryotic Translation Termination; Viral mRNA Translation; Formation of the ternary complex, and subsequently, the 43S complex; L13a-mediated translational silencing of Ceruloplasmin expression; Selenocysteine synthesis; Nonsense Mediated Decay (NMD) independent of the Exon Junction Complex (EJC); Nonsense Mediated Decay (NMD) enhanced by the Exon Junction Complex (EJC)…	38	10.06	0.00134771		9.79764e+07	1.45907e+08	1.37524e+08	1.27136e+08	2.09008e+07	6.58e+07	1.12649e+08	1.26581e+08	1.01677e+08	2.59984e+07	1.90901e+06	2.66173e+06	1.3943	0.479539
n/a	High	Master Protein	P05164-2	Isoform H14 of Myeloperoxidase [OS=Homo sapiens]		0	37	30	156	30	650	73.8	9.11	114.27	cell organization and biogenesis;defense response;metabolic process;regulation of biological process;response to stimulus;transport	extracellular;mitochondrion;nucleus;organelle lumen;vacuole	antioxidant activity;catalytic activity;metal ion binding	Pf03098	4353		MPO	17	Selenium Micronutrient Network; Vitamin B12 Metabolism; Folate Metabolism; Benzene metabolism			4	78.09	0		1.18618e+08	1.0212e+08	1.49874e+08	1.23537e+08	1.98034e+07	9.82834e+07	1.4604e+08	1.63717e+08	1.36014e+08	2.7638e+07	1.26434e+06	1.7518e+06	1.38554	0.470453
n/a	Medium	Master Protein	Q5CZC0-1	fibrous sheath-interacting protein 2 [OS=Homo sapiens]		0.023	0	1	2	1	6907	780.1	6.71	0		mitochondrion			401024	ENSG00000188738.14	FSIP2	2				0		0		9.85398e+07	1.42586e+08	1.28552e+08	1.23226e+08	1.8372e+07	6.94845e+07	1.20248e+08	1.19006e+08	1.02913e+08	2.36427e+07	1.42763e+07	1.97637e+07	1.38437	0.469235
n/a	High	Master Protein	Q9Y230	RuvB-like 2 [OS=Homo sapiens]		0	24	10	91	10	463	51.1	5.64	38.41	cell organization and biogenesis;metabolic process;regulation of biological process;response to stimulus	cytoplasm;cytosol;membrane;nucleus	catalytic activity;DNA binding;nucleotide binding;protein binding	Pf00004, Pf03796, Pf06068, Pf13481	10856	ENSG00000183207.13	RUVBL2	19			HATs acetylate histones; Telomere Extension By Telomerase	8	29.65	0		1.08732e+08	1.29281e+08	1.31049e+08	1.2302e+08	1.01291e+07	6.65857e+07	1.08824e+08	9.21175e+07	8.91756e+07	1.73685e+07	8.21786e+06	1.13751e+07	1.38419	0.469045
n/a	High	Master Protein	Q04917	14-3-3 protein eta [OS=Homo sapiens]		0	30	9	43	6	246	28.2	4.84	20.59	cell organization and biogenesis;metabolic process;regulation of biological process;response to stimulus;transport	cytoplasm;cytosol;membrane;mitochondrion	catalytic activity;protein binding	Pf00244	7533	ENSG00000128245.14	YWHAH	22	Cell Cycle; Myometrial Relaxation and Contraction Pathways; Calcium Regulation in the Cardiac Cell; Sudden Infant Death Syndrome (SIDS) Susceptibility Pathways	Hippo signaling pathway; Oocyte meiosis; Viral carcinogenesis; PI3K-Akt signaling pathway; Cell cycle; Epstein-Barr virus infection	Translocation of GLUT4 to the plasma membrane; Chk1/Chk2(Cds1) mediated inactivation of Cyclin B:Cdk1 complex; TP53 Regulates Metabolic Genes; Activation of BAD and translocation to mitochondria ; RHO GTPases activate PKNs	32	11.31	0.00147493	Acetyl [N-Term]	1.00634e+08	1.42697e+08	1.24807e+08	1.22713e+08	1.72358e+07	9.06917e+07	1.17904e+08	1.31085e+08	1.13227e+08	1.68189e+07	470898	651735	1.38403	0.468872
n/a	High	Master Protein	P31948	stress-induced-phosphoprotein 1 [OS=Homo sapiens]		0	28	18	82	18	543	62.6	6.8	33.83	response to stimulus	cytoplasm;cytosol;Golgi;nucleus	protein binding;RNA binding	Pf00515, Pf12895, Pf13414, Pf13424, Pf13432	10963	ENSG00000168439.16	STIP1	11		Prion diseases	HSP90 chaperone cycle for steroid hormone receptors (SHR)	4	20.01	0		1.0704e+08	1.20677e+08	1.3481e+08	1.20842e+08	1.13378e+07	7.66796e+07	1.17708e+08	1.25237e+08	1.06542e+08	2.13381e+07	4.40788e+06	6.08362e+06	1.38017	0.464844
n/a	High	Master Protein	P53621-1	coatomer subunit alpha [OS=Homo sapiens]		0	16	21	146	21	1224	138.3	7.66	84.49	regulation of biological process;transport	cytoplasm;cytosol;extracellular;Golgi;membrane	protein binding;structural molecule activity	Pf00400, Pf04053, Pf06957	1314	ENSG00000122218.14	COPA	1			COPI-dependent Golgi-to-ER retrograde traffic; COPI-mediated anterograde transport	11	30.31	0		9.979e+07	1.33189e+08	1.29453e+08	1.20811e+08	1.49421e+07	7.00212e+07	1.00057e+08	1.08073e+08	9.2717e+07	1.63787e+07	1.64424e+07	2.26115e+07	1.37519	0.459635
n/a	High	Master Protein	P47755	F-actin-capping protein subunit alpha-2 [OS=Homo sapiens]		0	50	11	79	9	286	32.9	5.85	64.8	cell organization and biogenesis;cellular component movement;coagulation;defense response;regulation of biological process;response to stimulus;transport	cytoskeleton;cytosol;extracellular;membrane	protein binding	Pf01267	830	ENSG00000198898.13	CAPZA2	7		Endocytosis	COPI-independent Golgi-to-ER retrograde traffic; Advanced glycosylation endproduct receptor signaling; COPI-mediated anterograde transport; MHC class II antigen presentation; HSP90 chaperone cycle for steroid hormone receptors (SHR); Factors involved in megakaryocyte development and platelet production	22	29	0	Acetyl [N-Term]	9.47136e+07	1.3941e+08	1.28085e+08	1.20736e+08	1.89729e+07	8.0741e+07	1.18372e+08	1.25516e+08	1.0821e+08	1.9641e+07	8.18867e+06	1.1258e+07	1.37483	0.459255
n/a	High	Master Protein	P18621	60S ribosomal protein L17 [OS=Homo sapiens]		0	35	7	72	7	184	21.4	10.17	50.26	cell organization and biogenesis;metabolic process;transport	cytosol;nucleus;ribosome	protein binding;RNA binding;structural molecule activity	Pf00237	6139	ENSG00000215472.10; ENSG00000265681.7	RPL17	18	Cytoplasmic Ribosomal Proteins	Ribosome	Peptide chain elongation; Eukaryotic Translation Termination; Viral mRNA Translation; L13a-mediated translational silencing of Ceruloplasmin expression; Nonsense Mediated Decay (NMD) independent of the Exon Junction Complex (EJC); Selenocysteine synthesis; Nonsense Mediated Decay (NMD) enhanced by the Exon Junction Complex (EJC); GTP hydrolysis and joining of the 60S ribosomal subunit; Major path…	34	35.73	0		9.70395e+07	1.36179e+08	1.26659e+08	1.19959e+08	1.66661e+07	7.93346e+07	1.40341e+08	1.32342e+08	1.17339e+08	2.7071e+07	2.46064e+07	3.38086e+07	1.37398	0.458359
n/a	High	Master Protein	P25787	Proteasome subunit alpha type-2 [OS=Homo sapiens]		0.002	44	10	44	10	234	25.9	7.43	6.49	metabolic process;regulation of biological process;response to stimulus;transport	cytoplasm;cytosol;extracellular;nucleus;organelle lumen;proteasome	catalytic activity;protein binding	Pf00227, Pf10584	5683	ENSG00000256646.7; ENSG00000106588.10	PSMA2	7	Proteasome Degradation	Proteasome	Regulation of RAS by GAPs; CDT1 association with the CDC6:ORC:origin complex; Downstream TCR signaling; UCH proteinases; NIK-->noncanonical NF-kB signaling; Hh mutants that don't undergo autocatalytic processing are degraded by ERAD; SCF-beta-TrCP mediated degradation of Emi1; Neutrophil degranulation; Cross-presentation of soluble exogenous antigens (endosomes); Separation of Sister Chromatids; …	151	15.33	0		1.02547e+08	1.36327e+08	1.20907e+08	1.19927e+08	1.3808e+07	7.98203e+07	1.17138e+08	1.17234e+08	1.04731e+08	1.76145e+07	9.96899e+07	1.36794e+08	1.3722	0.456486
n/a	Medium	Master Protein	P52943	Cysteine-rich protein 2 [OS=Homo sapiens]		0.023	41	9	38	9	208	22.5	8.72	0	regulation of biological process		metal ion binding;protein binding	Pf00412	1397	ENSG00000182809.10	CRIP2	14				0	26.83	0		1.02836e+08	1.33459e+08	1.23199e+08	1.19831e+08	1.27267e+07	8.23729e+07	1.2133e+08	1.26245e+08	1.09983e+08	1.9626e+07	2.21627e+07	3.04072e+07	1.372	0.45628
n/a	High	Master Protein	P41091	eukaryotic translation initiation factor 2 subunit 3 [OS=Homo sapiens]		0	36	14	101	14	472	51.1	8.4	72.94	metabolic process;transport	cytoplasm;cytosol;nucleus	catalytic activity;nucleotide binding;protein binding;RNA binding	Pf00009, Pf03144, Pf09173	1968	ENSG00000130741.10	EIF2S3	X	Translation Factors	RNA transport	Formation of the ternary complex, and subsequently, the 43S complex; L13a-mediated translational silencing of Ceruloplasmin expression; ABC-family proteins mediated transport; Translation initiation complex formation; GTP hydrolysis and joining of the 60S ribosomal subunit; Recycling of eIF2:GDP; Ribosomal scanning and start codon recognition	15	36.99	0		9.78083e+07	1.32519e+08	1.26409e+08	1.18912e+08	1.51297e+07	8.517e+07	1.28725e+08	1.32412e+08	1.15436e+08	2.1454e+07	7.63552e+07	1.04351e+08	1.36665	0.450641
n/a	High	Master Protein	P46781	40S ribosomal protein S9 [OS=Homo sapiens]		0	40	12	72	12	194	22.6	10.65	18.27	cell organization and biogenesis;metabolic process;regulation of biological process;transport	cytoplasm;cytosol;membrane;nucleus;ribosome	protein binding;RNA binding;structural molecule activity;translation regulator activity	Pf00163, Pf01479	6203	ENSG00000274005.3; ENSG00000275323.3; ENSG00000277079.3; ENSG00000278081.3; ENSG00000277359.3; ENSG00000170889.13; ENSG00000274950.4; ENSG00000274626.3; ENSG00000278270.4; ENSG00000274646.4	RPS9	19; CHR_HSCHR19LRC_LRC_T_CTG3_1; CHR_HSCHR19LRC_LRC_J_CTG3_1; CHR_HSCHR19LRC_PGF2_CTG3_1; CHR_HSCHR19LRC_LRC_S_CTG3_1; CHR_HSCHR19LRC_LRC_I_CTG3_1; CHR_HSCHR19LRC_PGF1_CTG3_1; CHR_HSCHR19LRC_COX2_CTG3_1; CHR_HSCHR19_4_CTG3_1; CHR_HSCHR19LRC_COX1_CTG3_1	Cytoplasmic Ribosomal Proteins	Ribosome	Peptide chain elongation; Eukaryotic Translation Termination; Viral mRNA Translation; Formation of the ternary complex, and subsequently, the 43S complex; L13a-mediated translational silencing of Ceruloplasmin expression; Selenocysteine synthesis; Nonsense Mediated Decay (NMD) independent of the Exon Junction Complex (EJC); Nonsense Mediated Decay (NMD) enhanced by the Exon Junction Complex (EJC)…	39	12.93	0		1.06464e+08	1.23915e+08	1.25867e+08	1.18749e+08	8.72295e+06	8.61839e+07	1.17217e+08	1.08158e+08	1.03853e+08	1.30298e+07	6.7262e+06	9.18835e+06	1.36605	0.450014
n/a	High	Master Protein	Q9NR30-1	Nucleolar RNA helicase 2 [OS=Homo sapiens]		0	13	9	58	9	783	87.3	9.28	41.61	cell differentiation;metabolic process;regulation of biological process;response to stimulus	cytoplasm;membrane;nucleus	catalytic activity;nucleotide binding;protein binding;RNA binding	Pf00270, Pf00271, Pf08152, Pf14617	9188	ENSG00000165732.12	DDX21	10			Major pathway of rRNA processing in the nucleolus and cytosol; B-WICH complex positively regulates rRNA expression	8	20.46	0		9.51448e+07	1.32349e+08	1.2516e+08	1.17552e+08	1.61134e+07	7.08371e+07	1.11374e+08	1.15861e+08	9.93576e+07	2.025e+07	2.68878e+08	3.6713e+08	1.36541	0.449339
n/a	High	Master Protein	P07305	Histone H1.0 [OS=Homo sapiens]		0.001	14	3	30	3	194	20.9	10.84	11.34	cell organization and biogenesis;metabolic process	chromosome;cytoskeleton;Golgi;nucleus	DNA binding;protein binding;RNA binding	Pf00538	3005	ENSG00000189060.5	H1F0	22			Formation of Senescence-Associated Heterochromatin Foci (SAHF); Activation of DNA fragmentation factor	10	7.36	0.00108578		1.30618e+08	7.65168e+07	1.42876e+08	1.1667e+08	2.88303e+07	1.47724e+08	1.37686e+08	1.17938e+08	1.34449e+08	1.23735e+07	1.09204e+07	1.49105e+07	1.36539	0.449308
n/a	High	Master Protein	O00160	Unconventional myosin-If [OS=Homo sapiens]		0	11	14	64	9	1098	124.8	9.11	49.29			catalytic activity;motor activity;nucleotide binding;protein binding	Pf00018, Pf00063, Pf06017, Pf07653, Pf14604	4542	ENSG00000142347.16	MYO1F	19				0	23.76	0		9.29808e+07	1.23465e+08	1.31726e+08	1.16057e+08	1.66623e+07	6.69906e+07	1.10446e+08	1.15376e+08	9.76043e+07	2.17405e+07	2.67365e+06	3.64326e+06	1.36266	0.446421
n/a	High	Master Protein	P52907	F-actin-capping protein subunit alpha-1 [OS=Homo sapiens]		0	64	14	123	12	286	32.9	5.69	79.66	cell organization and biogenesis;cellular component movement;coagulation;defense response;regulation of biological process;response to stimulus;transport	cytoplasm;cytoskeleton;cytosol;extracellular	protein binding	Pf01267	829	ENSG00000116489.12	CAPZA1	1		Endocytosis	COPI-independent Golgi-to-ER retrograde traffic; Gene and protein expression by JAK-STAT signaling after Interleukin-12 stimulation; Advanced glycosylation endproduct receptor signaling; Factors involved in megakaryocyte development and platelet production; COPI-mediated anterograde transport; MHC class II antigen presentation; HSP90 chaperone cycle for steroid hormone receptors (SHR); Interleuki…	26	75.51	0	Acetyl [N-Term]	1.52985e+08	5.87405e+07	1.35248e+08	1.15658e+08	4.08929e+07	1.00183e+08	1.58034e+08	1.36362e+08	1.31526e+08	2.38639e+07	8.70252e+06	1.18497e+07	1.36163	0.44534
n/a	High	Master Protein	O00567	Nucleolar protein 56 [OS=Homo sapiens]		0	22	12	78	12	594	66	9.19	67.53	metabolic process	cytoplasm;membrane;nucleus	protein binding;RNA binding	Pf01798, Pf08060, Pf08156	10528	ENSG00000101361.16	NOP56	20		Ribosome biogenesis in eukaryotes	Major pathway of rRNA processing in the nucleolus and cytosol; Association of TriC/CCT with target proteins during biosynthesis; rRNA modification in the nucleus and cytosol	10	35.41	0		8.91637e+07	1.35306e+08	1.2244e+08	1.15636e+08	1.9442e+07	6.15713e+07	1.02381e+08	1.0903e+08	9.09942e+07	2.09814e+07	2.13056e+07	2.89878e+07	1.36058	0.444217
n/a	High	Master Protein	Q9UHB6	LIM domain and actin-binding protein 1 [OS=Homo sapiens]		0	9	8	56	8	759	85.2	6.84	26.31	cell organization and biogenesis;regulation of biological process	cytoplasm;cytoskeleton	metal ion binding;protein binding	Pf00412	51474	ENSG00000050405.13	LIMA1	12				0	23.08	0		1.09966e+08	1.05122e+08	1.31421e+08	1.15503e+08	1.1428e+07	1.35084e+08	2.02216e+08	1.97675e+08	1.78325e+08	3.0632e+07	1.0229e+07	1.39137e+07	1.36022	0.443835
n/a	High	Master Protein	O14974-5	Isoform 5 of Protein phosphatase 1 regulatory subunit 12A [OS=Homo sapiens]		0	16	15	68	15	943	105.6	5.38	43.68	cell organization and biogenesis;metabolic process;regulation of biological process;response to stimulus	chromosome;cytoskeleton;cytosol	enzyme regulator activity;protein binding;signal transducer activity	Pf00023, Pf03961, Pf12796, Pf13606, Pf13637, Pf13857	4659	ENSG00000058272.16	PPP1R12A	12	Focal Adhesion; Regulation of Actin Cytoskeleton			2	20.97	0		9.17207e+07	1.24497e+08	1.30036e+08	1.15418e+08	1.69082e+07	4.91306e+07	7.70642e+07	8.11792e+07	6.91247e+07	1.42374e+07	3.84754e+07	5.23215e+07	1.35987	0.443468
n/a	High	Master Protein	P06702	Protein S100-A9 [OS=Homo sapiens]		0	75	10	208	10	114	13.2	6.13	121.93	cell communication;cell death;cellular component movement;defense response;metabolic process;regulation of biological process;response to stimulus;transport	cytoplasm;cytoskeleton;cytosol;extracellular;membrane;nucleus;organelle lumen	antioxidant activity;catalytic activity;metal ion binding;protein binding;signal transducer activity	Pf00036, Pf01023, Pf13499, Pf13833	6280	ENSG00000163220.10	S100A9	1	IL1 and megakaryocytes in obesity		Neutrophil degranulation; Metal sequestration by antimicrobial proteins; Regulation of TLR by endogenous ligand	8	65.29	0		9.28774e+07	1.33545e+08	1.1979e+08	1.15404e+08	1.68896e+07	8.44237e+07	1.29935e+08	1.35926e+08	1.16762e+08	2.2997e+07	2.71007e+07	3.68245e+07	1.3588	0.442336
n/a	High	Master Protein	P62277	40S ribosomal protein S13 [OS=Homo sapiens]		0	42	7	103	7	151	17.2	10.54	30.63	cell organization and biogenesis;metabolic process;regulation of biological process;transport	cytosol;membrane;nucleus;ribosome	protein binding;RNA binding;structural molecule activity	Pf00312, Pf08069	6207	ENSG00000110700.6	RPS13	11	Cytoplasmic Ribosomal Proteins	Ribosome	Peptide chain elongation; Eukaryotic Translation Termination; Viral mRNA Translation; Formation of the ternary complex, and subsequently, the 43S complex; L13a-mediated translational silencing of Ceruloplasmin expression; Selenocysteine synthesis; Nonsense Mediated Decay (NMD) independent of the Exon Junction Complex (EJC); Nonsense Mediated Decay (NMD) enhanced by the Exon Junction Complex (EJC)…	38	20.6	0		8.62791e+07	1.32525e+08	1.27042e+08	1.15282e+08	2.063e+07	6.28664e+07	1.11015e+08	1.06821e+08	9.35672e+07	2.17761e+07	1.00467e+06	1.36501e+06	1.35867	0.442198
n/a	High	Master Protein	Q15233	Non-POU domain-containing octamer-binding protein [OS=Homo sapiens]		0	17	8	38	8	471	54.2	8.95	33.76	defense response;metabolic process;regulation of biological process;response to stimulus	membrane;nucleus	DNA binding;protein binding;RNA binding	Pf00076, Pf08075, Pf13893, Pf14259	4841	ENSG00000147140.15	NONO	X	mRNA Processing			1	17.72	0		1.06575e+08	1.20932e+08	1.1688e+08	1.14796e+08	6.04369e+06	7.65614e+07	1.07068e+08	1.01626e+08	9.50853e+07	1.32855e+07	1.8736e+06	2.54501e+06	1.35836	0.441861
n/a	High	Master Protein	P62195-2	Isoform 2 of 26S proteasome regulatory subunit 8 [OS=Homo sapiens]		0	20	6	46	6	398	44.8	8.18	20.9	metabolic process;regulation of biological process;response to stimulus;transport	cytoplasm;cytosol;membrane;nucleus;proteasome	catalytic activity;nucleotide binding;protein binding;RNA binding	Pf00004, Pf00910, Pf01057, Pf01078, Pf05496, Pf06068, Pf06414, Pf07724, Pf07726, Pf07728, Pf13191, Pf13207, Pf13401	5705	ENSG00000087191.12	PSMC5	17	Proteasome Degradation; Parkin-Ubiquitin Proteasomal System pathway			2	14.88	0		9.22656e+07	1.44886e+08	1.04938e+08	1.1403e+08	2.24238e+07	3.01137e+07	4.22572e+07	4.0813e+07	3.77279e+07	5.4163e+06	3.14424e+06	4.26979e+06	1.35797	0.441454
n/a	High	Master Protein	P51812	Ribosomal protein S6 kinase alpha-3 [OS=Homo sapiens]		0	5	4	32	4	740	83.7	6.89	28.89	cell death;metabolic process;regulation of biological process;response to stimulus	cytoplasm;cytosol;nucleus	catalytic activity;enzyme regulator activity;metal ion binding;nucleotide binding;protein binding	Pf00069, Pf00433, Pf07714, Pf14531	6197	ENSG00000177189.12	RPS6KA3	X	Brain-Derived Neurotrophic Factor (BDNF) signaling pathway; Kit receptor signaling pathway; MAPK Signaling Pathway; Angiopoietin Like Protein 8 Regulatory Pathway; EGF/EGFR Signaling Pathway; Cytoplasmic Ribosomal Proteins; Insulin Signaling	Insulin resistance; Progesterone-mediated oocyte maturation; mTOR signaling pathway; MAPK signaling pathway; Neurotrophin signaling pathway; Oocyte meiosis; Long-term potentiation	CREB phosphorylation; ERK/MAPK targets; Recycling pathway of L1; Activated TLR4 signalling; Signaling by GPCR; Gastrin-CREB signalling pathway via PKC and MAPK; Senescence-Associated Secretory Phenotype (SASP); RSK activation	62	6.27	0.00100301		8.93764e+07	1.31641e+08	1.1607e+08	1.12363e+08	1.74527e+07	3.80526e+07	5.48732e+07	6.0258e+07	5.10613e+07	9.45755e+06	693783	941978	1.35774	0.441209
n/a	High	Master Protein	P84090	Enhancer of rudimentary homolog [OS=Homo sapiens]		0	25	3	43	3	104	12.3	5.92	17.36	metabolic process;regulation of biological process		DNA binding;nucleotide binding;protein binding;RNA binding	Pf01133	2079	ENSG00000100632.10	ERH	14				0	17.37	0	Acetyl [N-Term]	8.33809e+07	1.27395e+08	1.25401e+08	1.12059e+08	2.02948e+07	7.54731e+07	1.44714e+08	1.4338e+08	1.21189e+08	3.23307e+07	1.75384e+06	2.37978e+06	1.3569	0.440312
n/a	High	Master Protein	Q9Y4I1-1	Unconventional myosin-Va [OS=Homo sapiens]		0	10	18	133	18	1855	215.3	8.48	82.62	cell communication;cell differentiation;cell organization and biogenesis;cellular component movement;metabolic process;regulation of biological process;response to stimulus;transport	cytoplasm;cytoskeleton;cytosol;endoplasmic reticulum;endosome;extracellular;Golgi;membrane;vacuole	catalytic activity;metal ion binding;motor activity;nucleotide binding;protein binding;RNA binding	Pf00063, Pf00612, Pf00769, Pf01442, Pf01576, Pf01843, Pf02463, Pf04111, Pf04156, Pf05262, Pf05557, Pf06160, Pf07888, Pf07926, Pf09726, Pf09731, Pf10174, Pf12128, Pf12718, Pf13851, Pf14992, Pf15035, Pf15070	4644	ENSG00000197535.14	MYO5A	15			Translocation of GLUT4 to the plasma membrane; Regulation of actin dynamics for phagocytic cup formation; Insulin processing	10	40.95	0		9.72285e+07	1.27382e+08	1.09764e+08	1.11458e+08	1.23684e+07	7.40161e+07	1.09905e+08	1.15086e+08	9.9669e+07	1.82623e+07	5.81817e+07	7.88138e+07	1.35461	0.437882
n/a	High	Master Protein	P55060-3	Isoform 3 of Exportin-2 [OS=Homo sapiens]		0	15	14	91	14	945	107.7	5.82	79.78	cell death;cell proliferation;transport	cytoplasm;cytosol;membrane;nucleus	protein binding;transporter activity	Pf03378, Pf03810, Pf08506	1434		CSE1L	20				0	36.27	0		9.1375e+07	1.14214e+08	1.27894e+08	1.11161e+08	1.50643e+07	6.04506e+07	9.82799e+07	1.10846e+08	8.98589e+07	2.14183e+07	2.34444e+06	3.17296e+06	1.3534	0.436584
n/a	High	Master Protein	Q13557	Calcium/calmodulin-dependent protein kinase type II subunit delta [OS=Homo sapiens]		0	17	10	58	9	499	56.3	7.25	40.65	cell differentiation;cell organization and biogenesis;cellular component movement;cellular homeostasis;metabolic process;regulation of biological process;response to stimulus	cytoplasm;cytosol;endoplasmic reticulum;membrane;nucleus	catalytic activity;nucleotide binding;protein binding	Pf00069, Pf07714, Pf08332, Pf12680, Pf13474, Pf14534	817	ENSG00000145349.16	CAMK2D	4	Physiological and Pathological Hypertrophy of the Heart; MicroRNAs in cardiomyocyte hypertrophy; SRF and miRs in Smooth Muscle Differentiation and Proliferation; Cardiac Hypertrophic Response; Myometrial Relaxation and Contraction Pathways; Calcium Regulation in the Cardiac Cell	HIF-1 signaling pathway; Tuberculosis; Axon guidance; Insulin secretion; Gastric acid secretion; Circadian entrainment; Proteoglycans in cancer; Neurotrophin signaling pathway; Glucagon signaling pathway; Cholinergic synapse; Dopaminergic synapse; Glioma; GnRH signaling pathway; ErbB signaling pathway; Oocyte meiosis; Oxytocin signaling pathway; Wnt signaling pathway; cAMP signaling pathway; Infl…	Ion homeostasis; HSF1-dependent transactivation; Interferon gamma signaling; Phase 0 - rapid depolarisation; Ras activation uopn Ca2+ infux through NMDA receptor; Ion transport by P-type ATPases; Unblocking of NMDA receptor, glutamate binding and activation; Trafficking of AMPA receptors; CREB phosphorylation through the activation of CaMKII; RAF/MAP kinase cascade; Interleukin-20 family signaling	64	17.9	0		9.33413e+07	1.28226e+08	1.09353e+08	1.10307e+08	1.42575e+07	5.34867e+07	7.85477e+07	8.42839e+07	7.21061e+07	1.33725e+07	4.65636e+07	6.29367e+07	1.35163	0.434699
n/a	High	Master Protein	P23526-1	Adenosylhomocysteinase [OS=Homo sapiens]		0	25	11	101	11	432	47.7	6.34	66.75	defense response;metabolic process;response to stimulus;transport	cytoplasm;cytosol;nucleus	catalytic activity;nucleotide binding;protein binding	Pf00670, Pf02254, Pf02826, Pf05221	191	ENSG00000101444.12	AHCY	20	Folate Metabolism; Trans-sulfuration pathway; One Carbon Metabolism; Trans-sulfuration and one carbon metabolism	Metabolic pathways; Cysteine and methionine metabolism	Metabolism of ingested SeMet, Sec, MeSec into H2Se; Defective AHCY causes Hypermethioninemia with S-adenosylhomocysteine hydrolase deficiency (HMAHCHD); Sulfur amino acid metabolism; Methylation	18	21.22	0		8.20701e+07	1.20849e+08	1.25332e+08	1.09417e+08	1.94235e+07	4.57808e+07	8.58012e+07	8.79975e+07	7.31932e+07	1.94042e+07	4.93437e+07	6.65318e+07	1.34833	0.431179
n/a	Medium	Master Protein	P51659-1	peroxisomal multifunctional enzyme type 2 [OS=Homo sapiens]		0.024	4	4	19	4	736	79.6	8.84	0	cell differentiation;metabolic process	membrane;mitochondrion;organelle lumen	catalytic activity;protein binding	Pf00106, Pf01575, Pf02036, Pf08659, Pf13452, Pf13561, Pf14864	3295	ENSG00000133835.14	HSD17B4	5	Steroid Biosynthesis	Peroxisome; Primary bile acid biosynthesis; Metabolic pathways	Beta-oxidation of pristanoyl-CoA; Synthesis of bile acids and bile salts via 7alpha-hydroxycholesterol; alpha-linolenic acid (ALA) metabolism; Beta-oxidation of very long chain fatty acids	16	6.42	0.0010101		9.29445e+07	1.23992e+08	1.09959e+08	1.08965e+08	1.26947e+07	7.62284e+07	1.12846e+08	1.24524e+08	1.04533e+08	2.05741e+07	1.66694e+07	2.24666e+07	1.34777	0.430574
n/a	High	Master Protein	P60953	Cell division control protein 42 homolog [OS=Homo sapiens]		0.001	39	7	44	6	191	21.2	6.55	16.11	cell communication;cell differentiation;cell division;cell organization and biogenesis;cellular component movement;coagulation;metabolic process;regulation of biological process;response to stimulus;transport	cytoplasm;cytoskeleton;cytosol;membrane;vacuole	catalytic activity;nucleotide binding;protein binding	Pf00025, Pf00071, Pf08477	998	ENSG00000070831.15	CDC42	1	Androgen receptor signaling pathway; Target Of Rapamycin (TOR) Signaling; Integrin-mediated Cell Adhesion; Integrated Breast Cancer Pathway; RANKL/RANK (Receptor activator of NFKB (ligand)) Signaling Pathway; Leptin signaling pathway; Regulation of Microtubule Cytoskeleton; Metastatic brain tumor; Pathogenic Escherichia coli infection; RalA downstream regulated genes; B Cell Receptor Signaling Pa…	Neurotrophin signaling pathway; Regulation of actin cytoskeleton; Tight junction; Proteoglycans in cancer; Chemokine signaling pathway; Viral carcinogenesis; AGE-RAGE signaling pathway in diabetic complications; Fc gamma R-mediated phagocytosis; Rap1 signaling pathway; Non-alcoholic fatty liver disease (NAFLD); Pancreatic cancer; Adherens junction; Axon guidance; T cell receptor signaling pathway…	RHO GTPases activate PAKs; G alpha (12/13) signalling events; DCC mediated attractive signaling; Gene and protein expression by JAK-STAT signaling after Interleukin-12 stimulation; RHO GTPases activate KTN1; Rho GTPase cycle; VEGFA-VEGFR2 Pathway; EGFR downregulation; RHO GTPases activate IQGAPs; Factors involved in megakaryocyte development and platelet production; CDO in myogenesis; EPHB-mediat…	102	14.32	0		9.79501e+07	1.14549e+08	1.11074e+08	1.07858e+08	7.14799e+06	5.89031e+07	8.34284e+07	8.75755e+07	7.66357e+07	1.26526e+07	8.07145e+06	1.08753e+07	1.34738	0.430156
n/a	High	Master Protein	Q10567-4	Isoform 4 of AP-1 complex subunit beta-1 [OS=Homo sapiens]		0	16	14	64	7	919	101.3	5.11	75.32	regulation of biological process;transport	cytosol;Golgi;membrane	protein binding;transporter activity	Pf01602, Pf02883, Pf09066, Pf12717, Pf13646	162		AP1B1	22				0	12.44	0		8.94971e+07	1.22016e+08	1.11941e+08	1.07818e+08	1.35921e+07	4.90598e+07	8.54131e+07	9.23792e+07	7.56173e+07	1.89931e+07	378019	509306	1.3473	0.430075
n/a	High	Master Protein	P53396-2	Isoform 2 of ATP-citrate synthase [OS=Homo sapiens]		0	14	15	47	15	1091	119.7	7.33	23.27	metabolic process;regulation of biological process;transport	cytoplasm;cytosol;extracellular;membrane;organelle lumen	catalytic activity;metal ion binding;nucleotide binding;protein binding	Pf00285, Pf00549, Pf02629, Pf08442	47	ENSG00000131473.16	ACLY	17	Sterol Regulatory Element-Binding Proteins (SREBP) signalling; TCA Cycle and Deficiency of Pyruvate Dehydrogenase complex (PDHc); Fatty Acid Biosynthesis; Amino Acid metabolism			4	22.11	0		7.94773e+07	1.29411e+08	1.09729e+08	1.06205e+08	2.05369e+07	4.5954e+07	7.17824e+07	7.00164e+07	6.25843e+07	1.17814e+07	3.25723e+06	4.37847e+06	1.34423	0.426785
n/a	High	Master Protein	Q9H2D6-3	Isoform 4 of TRIO and F-actin-binding protein [OS=Homo sapiens]		0.001	3	6	39	6	2193	242.9	9.23	11.68	cell division;cell organization and biogenesis;metabolic process;regulation of biological process	cytoplasm;cytoskeleton;nucleus	protein binding;RNA binding	Pf00169, Pf04156, Pf04514, Pf05109, Pf05110, Pf11559	11078		TRIOBP	22				0	6.7	0.0010352		8.48558e+07	1.22807e+08	1.10043e+08	1.05902e+08	1.57679e+07	6.47542e+07	1.08417e+08	1.08745e+08	9.39721e+07	2.06606e+07	1.1681e+07	1.56741e+07	1.34184	0.424214
n/a	High	Master Protein	P22087	rRNA 2'-O-methyltransferase fibrillarin [OS=Homo sapiens]		0	38	9	88	9	321	33.8	10.18	92.59	cell differentiation;cell organization and biogenesis;metabolic process	chromosome;membrane;nucleus	catalytic activity;protein binding;RNA binding	Pf01135, Pf01269, Pf13847	2091	ENSG00000280548.3; ENSG00000105202.8	FBL	19; CHR_HG2021_PATCH		Ribosome biogenesis in eukaryotes	Major pathway of rRNA processing in the nucleolus and cytosol; rRNA modification in the nucleus and cytosol	6	35.61	0		1.06909e+08	9.10711e+07	1.16797e+08	1.04926e+08	1.05959e+07	9.05096e+07	1.33821e+08	1.23859e+08	1.16063e+08	1.85211e+07	6.31127e+06	8.45525e+06	1.33971	0.421918
n/a	High	Master Protein	P45880	Voltage-dependent anion-selective channel protein 2 [OS=Homo sapiens]		0	39	8	72	8	294	31.5	7.56	69.51	regulation of biological process;transport	membrane;mitochondrion;nucleus	nucleotide binding;protein binding;transporter activity	Pf01459	7417	ENSG00000165637.13	VDAC2	10		HTLV-I infection; NOD-like receptor signaling pathway; Calcium signaling pathway; Huntington's disease; Parkinson's disease; cGMP-PKG signaling pathway	Mitochondrial calcium ion transport; Ub-specific processing proteases	12	47.18	0		7.20193e+07	1.16785e+08	1.25906e+08	1.04903e+08	2.35488e+07	6.68934e+07	9.70535e+07	1.13729e+08	9.25587e+07	1.93829e+07	7.67823e+06	1.02799e+07	1.33883	0.420977
n/a	High	Master Protein	P62937	peptidyl-prolyl cis-trans isomerase A [OS=Homo sapiens]		0	44	6	35	6	165	18	7.81	17.86	cell organization and biogenesis;cellular component movement;metabolic process;regulation of biological process;response to stimulus;transport	cytoplasm;cytosol;extracellular;membrane;nucleus;organelle lumen	catalytic activity;protein binding;RNA binding	Pf00160	5478	ENSG00000196262.13	PPIA	7	Prolactin Signaling Pathway		Budding and maturation of HIV virion; Gene and protein expression by JAK-STAT signaling after Interleukin-12 stimulation; Minus-strand DNA synthesis; Binding and entry of HIV virion; Basigin interactions; APOBEC3G mediated resistance to HIV-1 infection; Uncoating of the HIV Virion; Calcineurin activates NFAT; Platelet degranulation ; Plus-strand DNA synthesis; Integration of provirus; Neutrophil …	34	21.97	0		7.9981e+07	1.12332e+08	1.17071e+08	1.03128e+08	1.64812e+07	7.22845e+07	1.26673e+08	1.34893e+08	1.11284e+08	2.77799e+07	1.07824e+07	1.44261e+07	1.33793	0.419998
n/a	High	Master Protein	Q9UHD8-1	Septin-9 [OS=Homo sapiens]		0	20	10	83	10	586	65.4	8.97	53.24	cell division;cell organization and biogenesis;regulation of biological process	cytoplasm;cytoskeleton	catalytic activity;nucleotide binding;protein binding	Pf00735, Pf01926, Pf03193, Pf04548	10801	ENSG00000184640.17	SEPT9	17		Bacterial invasion of epithelial cells		1	30.5	0		8.23563e+07	1.16671e+08	1.05806e+08	1.01611e+08	1.43195e+07	6.62637e+07	9.4755e+07	1.09921e+08	9.03132e+07	1.80976e+07	1.25142e+07	1.66968e+07	1.33422	0.415999
n/a	High	Master Protein	Q07157-2	Isoform Short of Tight junction protein ZO-1 [OS=Homo sapiens]		0	11	18	110	18	1668	186.9	6.79	70.43	cell communication;cell organization and biogenesis;regulation of biological process;response to stimulus	cytoplasm;cytosol;membrane	protein binding	Pf00018, Pf00595, Pf00625, Pf00791, Pf07653, Pf13180	7082	ENSG00000104067.16	TJP1	15				0	22.85	0		8.02266e+07	1.0638e+08	1.1542e+08	1.00676e+08	1.49232e+07	7.22938e+07	9.87967e+07	1.07815e+08	9.29686e+07	1.50758e+07	1.06974e+06	1.42714e+06	1.3341	0.41587
n/a	High	Master Protein	Q53GQ0	Very-long-chain 3-oxoacyl-CoA reductase [OS=Homo sapiens]		0.001	20	9	48	9	312	34.3	9.32	7.02	cell organization and biogenesis;metabolic process;regulation of biological process	endoplasmic reticulum;membrane	catalytic activity;protein binding	Pf00106, Pf03435, Pf08659, Pf13460, Pf13561	51144	ENSG00000149084.12	HSD17B12	11		Metabolic pathways; Steroid hormone biosynthesis; Fatty acid elongation; Fatty acid metabolism; Biosynthesis of unsaturated fatty acids	Androgen biosynthesis; Synthesis of very long-chain fatty acyl-CoAs	13	11.84	0		8.32037e+07	1.06639e+08	1.12026e+08	1.00623e+08	1.25121e+07	5.51033e+07	8.2722e+07	8.5756e+07	7.45271e+07	1.37905e+07	3.96074e+07	5.28104e+07	1.33335	0.415051
n/a	High	Master Protein	P12270	Nucleoprotein TPR [OS=Homo sapiens]		0	7	17	90	17	2363	267.1	5.02	78.48	cell division;cell organization and biogenesis;metabolic process;regulation of biological process;response to stimulus;transport	chromosome;cytoplasm;cytoskeleton;membrane;nucleus	catalytic activity;motor activity;protein binding;RNA binding;structural molecule activity;transporter activity	Pf00038, Pf01496, Pf01576, Pf02463, Pf03961, Pf04111, Pf05911, Pf07888, Pf07926, Pf09726, Pf12128, Pf13166, Pf13514	7175	ENSG00000047410.13	TPR	1		RNA transport; Thyroid cancer; Pathways in cancer	Rev-mediated nuclear export of HIV RNA; ISG15 antiviral mechanism; NEP/NS2 Interacts with the Cellular Export Machinery; tRNA processing in the nucleus; Transcriptional regulation by small RNAs; Defective TPR may confer susceptibility towards thyroid papillary carcinoma (TPC); Nuclear Pore Complex (NPC) Disassembly; Regulation of Glucokinase by Glucokinase Regulatory Protein; Vpr-mediated nuclear…	69	41.45	0		1.10349e+08	8.55314e+07	1.05292e+08	1.00391e+08	1.07081e+07	4.13749e+07	6.19049e+07	6.35874e+07	5.56224e+07	1.00979e+07	6.85379e+06	9.13424e+06	1.33273	0.414382
n/a	High	Master Protein	P50914	60S ribosomal protein L14 [OS=Homo sapiens]		0.001	21	6	28	6	215	23.4	10.93	9.62	cell organization and biogenesis;metabolic process;transport	cytosol;membrane;ribosome	protein binding;RNA binding;structural molecule activity	Pf01929	9045	ENSG00000188846.13	RPL14	3	Cytoplasmic Ribosomal Proteins	Ribosome	Peptide chain elongation; Eukaryotic Translation Termination; Viral mRNA Translation; L13a-mediated translational silencing of Ceruloplasmin expression; Nonsense Mediated Decay (NMD) independent of the Exon Junction Complex (EJC); Selenocysteine synthesis; Nonsense Mediated Decay (NMD) enhanced by the Exon Junction Complex (EJC); GTP hydrolysis and joining of the 60S ribosomal subunit; Major path…	34	5.82	0.00094518		8.3555e+07	1.19652e+08	9.79541e+07	1.00387e+08	1.48365e+07	5.84035e+07	9.83173e+07	1.00335e+08	8.56853e+07	1.93088e+07	4.02174e+07	5.34722e+07	1.32958	0.41097
n/a	High	Master Protein	Q9Y5B9	FACT complex subunit SPT16 [OS=Homo sapiens]		0	13	11	42	11	1047	119.8	5.66	29.55	cell organization and biogenesis;metabolic process;regulation of biological process;response to stimulus	chromosome;nucleus	protein binding;RNA binding	Pf00557, Pf08512, Pf08644, Pf14826	11198	ENSG00000092201.9	SUPT16H	14			HIV elongation arrest and recovery; TP53 Regulates Transcription of DNA Repair Genes; Tat-mediated HIV elongation arrest and recovery; Formation of RNA Pol II elongation complex ; Formation of HIV elongation complex in the absence of HIV Tat; Regulation of TP53 Activity through Phosphorylation; RNA Polymerase II Pre-transcription Events; Pausing and recovery of HIV elongation; Pausing and recover…	24	25.1	0		7.55742e+07	1.11594e+08	1.13979e+08	1.00382e+08	1.75689e+07	7.55806e+07	1.27187e+08	1.29947e+08	1.10905e+08	2.50036e+07	5.61656e+08	7.4676e+08	1.32957	0.410958
n/a	High	Master Protein	Q9UQ80	proliferation-associated protein 2G4 [OS=Homo sapiens]		0	34	13	100	13	394	43.8	6.55	68.7	cell proliferation;metabolic process;regulation of biological process;transport	cytoplasm;extracellular;membrane;nucleus;organelle lumen	DNA binding;protein binding;RNA binding	Pf00557	5036	ENSG00000170515.13	PA2G4	12			Neutrophil degranulation	3	53.6	0		6.73816e+07	1.4022e+08	9.33207e+07	1.00307e+08	3.01436e+07	6.00593e+07	9.58141e+07	1.00402e+08	8.54251e+07	1.80339e+07	4.39898e+06	5.84134e+06	1.32788	0.40913
n/a	High	Master Protein	Q13303-3	Isoform 3 of Voltage-gated potassium channel subunit beta-2 [OS=Homo sapiens]		0	13	5	39	5	415	46.5	8.72	16.88	cell differentiation;metabolic process;regulation of biological process;transport	cytoplasm;cytosol;membrane	catalytic activity;transporter activity	Pf00248	8514	ENSG00000069424.14	KCNAB2	1	Metapathway biotransformation			1	12.05	0		9.28602e+07	1.0468e+08	1.03226e+08	1.00255e+08	5.26271e+06	6.12693e+07	6.58225e+07	6.19663e+07	6.30194e+07	2.00244e+06	3.23289e+07	4.28378e+07	1.32506	0.406058
n/a	High	Master Protein	P09493-5	Isoform 5 of Tropomyosin alpha-1 chain [OS=Homo sapiens]		0	44	14	119	5	245	28.4	4.77	148.93	cell organization and biogenesis;cellular component movement;regulation of biological process;response to stimulus	cytoskeleton;cytosol	protein binding;structural molecule activity	Pf00261, Pf12718	7168	ENSG00000140416.19	TPM1	15	Striated Muscle Contraction			1	25.09	0	Acetyl [N-Term]	7.95583e+07	1.13351e+08	1.06161e+08	9.96899e+07	1.45347e+07	9.31941e+07	1.53256e+08	1.63932e+08	1.36794e+08	3.11364e+07	5.02389e+06	6.65482e+06	1.32464	0.405596
n/a	High	Master Protein	O14818-1	Proteasome subunit alpha type-7 [OS=Homo sapiens]		0	31	6	74	6	248	27.9	8.46	21.26	metabolic process;regulation of biological process;response to stimulus;transport	cytoplasm;cytosol;nucleus;proteasome	catalytic activity;nucleotide binding;protein binding	Pf00227, Pf10584	5688	ENSG00000101182.14	PSMA7	20	Proteasome Degradation	Proteasome	Regulation of RAS by GAPs; CDT1 association with the CDC6:ORC:origin complex; Downstream TCR signaling; UCH proteinases; NIK-->noncanonical NF-kB signaling; Hh mutants that don't undergo autocatalytic processing are degraded by ERAD; SCF-beta-TrCP mediated degradation of Emi1; Cross-presentation of soluble exogenous antigens (endosomes); Separation of Sister Chromatids; Vpu mediated degradation o…	150	16.71	0		1.05706e+08	1.09426e+08	8.12479e+07	9.87936e+07	1.24993e+07	4.21281e+07	5.93673e+07	6.56895e+07	5.57283e+07	9.95712e+06	1.42368e+06	1.87825e+06	1.31929	0.39976
n/a	High	Master Protein	P35606	Coatomer subunit beta' [OS=Homo sapiens]		0	8	8	54	8	906	102.4	5.27	34.59	transport	cytoplasm;cytosol;Golgi;membrane	protein binding;structural molecule activity	Pf00400, Pf04053	9276	ENSG00000184432.9	COPB2	3			COPI-dependent Golgi-to-ER retrograde traffic; COPI-mediated anterograde transport	11	19.42	0		9.67301e+07	7.4312e+07	1.22743e+08	9.79285e+07	1.97902e+07	7.79705e+07	9.47747e+07	9.43406e+07	8.90286e+07	7.82126e+06	1.27246e+07	1.67666e+07	1.31765	0.397967
n/a	High	Master Protein	Q96SB3	Neurabin-2 [OS=Homo sapiens]		0	14	13	86	13	815	89.1	4.97	40.43	cell differentiation;cell organization and biogenesis;cellular component movement;development;metabolic process;regulation of biological process;response to stimulus	cytoplasm;cytoskeleton;membrane;nucleus	enzyme regulator activity;protein binding;structural molecule activity	Pf00038, Pf00595, Pf04012, Pf04111, Pf04156, Pf05557, Pf07106, Pf07888, Pf14992	84687		PPP1R9B	17				0	29.11	0		1.07549e+08	7.84909e+07	1.07668e+08	9.79026e+07	1.37262e+07	1.04553e+08	1.42825e+08	1.38595e+08	1.28658e+08	1.71319e+07	1.81486e+07	2.39041e+07	1.31714	0.397405
n/a	High	Master Protein	P40939	Trifunctional enzyme subunit alpha, mitochondrial [OS=Homo sapiens]		0.001	11	10	50	10	763	82.9	9.04	10.93	metabolic process;response to stimulus	membrane;mitochondrion	catalytic activity;nucleotide binding;protein binding	Pf00378, Pf00725, Pf02737	3030	ENSG00000084754.10	HADHA	2	Fatty Acid Beta Oxidation; Mitochondrial LC-Fatty Acid Beta-Oxidation; Valproic acid pathway; Sudden Infant Death Syndrome (SIDS) Susceptibility Pathways	Metabolic pathways; beta-Alanine metabolism; Propanoate metabolism; Valine, leucine and isoleucine degradation; Biosynthesis of unsaturated fatty acids; Lysine degradation; Fatty acid degradation; Tryptophan metabolism; Fatty acid elongation; Carbon metabolism; Butanoate metabolism; Fatty acid metabolism	Beta oxidation of hexanoyl-CoA to butanoyl-CoA; Beta oxidation of lauroyl-CoA to decanoyl-CoA-CoA; Beta oxidation of palmitoyl-CoA to myristoyl-CoA; Beta oxidation of myristoyl-CoA to lauroyl-CoA; Acyl chain remodeling of CL; Beta oxidation of decanoyl-CoA to octanoyl-CoA-CoA; mitochondrial fatty acid beta-oxidation of unsaturated fatty acids; Beta oxidation of octanoyl-CoA to hexanoyl-CoA	31	14.62	0		7.50188e+07	1.12777e+08	1.04381e+08	9.73923e+07	1.61875e+07	5.54357e+07	9.20555e+07	8.96575e+07	7.90495e+07	1.67262e+07	2.35613e+08	3.10002e+08	1.31572	0.395855
n/a	High	Master Protein	P16284-3	Isoform Delta13 of Platelet endothelial cell adhesion molecule [OS=Homo sapiens]		0	18	12	53	12	717	80.2	7.33	52.51	cell organization and biogenesis;cellular component movement;regulation of biological process;response to stimulus;transport	membrane	protein binding	Pf00047, Pf07679, Pf13895, Pf13927	5175		PECAM1	17				0	39.93	0		8.19564e+07	1.04457e+08	1.05459e+08	9.72908e+07	1.08508e+07	5.69831e+07	9.29341e+07	9.44884e+07	8.14685e+07	1.73255e+07	9.79026e+07	1.28658e+08	1.31414	0.394119
n/a	High	Master Protein	P23246-1	splicing factor, proline- and glutamine-rich [OS=Homo sapiens]		0	19	13	115	13	707	76.1	9.44	87.96	cell organization and biogenesis;defense response;metabolic process;regulation of biological process;response to stimulus	chromosome;cytoplasm;nucleus	DNA binding;protein binding;RNA binding	Pf00076, Pf08075, Pf13893, Pf14259	6421	ENSG00000116560.10	SFPQ	1	mRNA Processing		PTK6 Regulates Proteins Involved in RNA Processing	5	47.12	0		7.66115e+07	1.10328e+08	1.02708e+08	9.65494e+07	1.44373e+07	5.008e+07	8.13732e+07	8.75774e+07	7.30102e+07	1.64107e+07	1.65366e+07	2.1724e+07	1.31369	0.393624
n/a	High	Master Protein	P00558	phosphoglycerate kinase 1 [OS=Homo sapiens]		0	37	14	90	14	417	44.6	8.1	53.89	cell differentiation;metabolic process;regulation of biological process;response to stimulus	cytoplasm;cytosol;membrane	catalytic activity;nucleotide binding;protein binding	Pf00162	5230	ENSG00000102144.13	PGK1	X	Cori Cycle; Photodynamic therapy-induced HIF-1 survival signaling; Glycolysis and Gluconeogenesis	HIF-1 signaling pathway; Glycolysis / Gluconeogenesis; Metabolic pathways; Carbon metabolism; Biosynthesis of amino acids	Gluconeogenesis; Glycolysis	13	39.24	0		8.50229e+07	1.06786e+08	9.73283e+07	9.63789e+07	8.90991e+06	4.76477e+07	7.00081e+07	7.11267e+07	6.29275e+07	1.08141e+07	4.94269e+06	6.48743e+06	1.31253	0.392349
n/a	High	Master Protein	O75083	WD repeat-containing protein 1 [OS=Homo sapiens]		0	26	17	95	17	606	66.2	6.65	28.22	cell differentiation;cell organization and biogenesis;cellular component movement;metabolic process;regulation of biological process;transport	cytoplasm;cytoskeleton;cytosol;extracellular	protein binding	Pf00400, Pf04762, Pf08662, Pf14783	9948	ENSG00000071127.16	WDR1	4	Hypertrophy Model		Platelet degranulation	5	19.29	0		7.54778e+07	1.09926e+08	1.01839e+08	9.57477e+07	1.47082e+07	8.02705e+07	1.21353e+08	1.24884e+08	1.08836e+08	2.02502e+07	2.60847e+09	3.42083e+09	1.31143	0.39114
n/a	High	Master Protein	P04083	annexin A1 [OS=Homo sapiens]		0	49	18	135	18	346	38.7	7.02	96.78	cell differentiation;cell organization and biogenesis;cellular component movement;defense response;metabolic process;regulation of biological process;response to stimulus;transport	cell surface;cytoplasm;cytoskeleton;cytosol;endosome;extracellular;membrane;nucleus;vacuole	catalytic activity;DNA binding;enzyme regulator activity;metal ion binding;protein binding;RNA binding;structural molecule activity	Pf00191	301	ENSG00000135046.13	ANXA1	9	Integrated Breast Cancer Pathway; Spinal Cord Injury; VEGFA-VEGFR2 Signaling Pathway; Prostaglandin Synthesis and Regulation		Gastrin-CREB signalling pathway via PKC and MAPK; G alpha (i) signalling events; Smooth Muscle Contraction; Interleukin-4 and 13 signaling; Formyl peptide receptors bind formyl peptides and many other ligands	20	59.39	0		8.08375e+07	9.69916e+07	1.07989e+08	9.52726e+07	1.11509e+07	7.69027e+07	1.18733e+08	1.19963e+08	1.05199e+08	2.00151e+07	1.77376e+09	2.32081e+09	1.30841	0.38782
n/a	High	Master Protein	Q69YQ0-1	Cytospin-A [OS=Homo sapiens]		0.001	8	10	25	10	1117	124.5	5.72	6.95	cell division;metabolic process	cytoplasm;cytoskeleton;cytosol	protein binding;structural molecule activity	Pf00038, Pf00307, Pf01920, Pf02463, Pf03251, Pf04111, Pf04156, Pf05667, Pf05701, Pf08317, Pf11971, Pf12128, Pf13166	23384		SPECC1L	22				0	14.19	0		9.30361e+07	9.41677e+07	9.82262e+07	9.51433e+07	2.22833e+06	6.56347e+07	8.53361e+07	7.21022e+07	7.43577e+07	8.19968e+06	3.4455e+06	4.50506e+06	1.30752	0.38683
n/a	High	Master Protein	Q04637-5	Isoform D of Eukaryotic translation initiation factor 4 gamma 1 [OS=Homo sapiens]		0	9	15	90	15	1435	158.4	5.21	85.76	cell organization and biogenesis;defense response;metabolic process;regulation of biological process;response to stimulus	cytoplasm;cytosol;membrane;nucleus	nucleotide binding;protein binding;RNA binding;structural molecule activity	Pf00566, Pf02020, Pf02847, Pf02854	1981	ENSG00000114867.20	EIF4G1	3	Translation Factors			1	39.94	0		9.76583e+07	8.81609e+07	9.94082e+07	9.50758e+07	4.94148e+06	5.65381e+07	7.56275e+07	8.12412e+07	7.11356e+07	1.05733e+07	7.84041e+07	1.02437e+08	1.30653	0.385739
n/a	High	Master Protein	P07814	Bifunctional glutamate/proline--tRNA ligase [OS=Homo sapiens]		0	7	12	58	12	1512	170.5	7.33	34.94	cell organization and biogenesis;metabolic process;regulation of biological process;response to stimulus	cytoplasm;cytosol;membrane	catalytic activity;metal ion binding;nucleotide binding;protein binding;RNA binding	Pf00458, Pf00587, Pf00749, Pf01406, Pf03129, Pf03950, Pf09180, Pf14497	2058	ENSG00000136628.17	EPRS	1	Parkinsons Disease Pathway; Amino Acid metabolism	Metabolic pathways; Porphyrin and chlorophyll metabolism; Aminoacyl-tRNA biosynthesis	tRNA modification in the nucleus and cytosol; Cytosolic tRNA aminoacylation; SeMet incorporation into proteins	16	12.4	0		5.97474e+07	1.14566e+08	1.10071e+08	9.47949e+07	2.48501e+07	1.92622e+07	3.70771e+07	6.63458e+07	4.0895e+07	1.94104e+07	1.02637e+07	1.34023e+07	1.30579	0.384926
n/a	High	Master Protein	P25398	40S ribosomal protein S12 [OS=Homo sapiens]		0	48	5	83	5	132	14.5	7.21	94.28	cell organization and biogenesis;metabolic process;transport	cytoplasm;cytosol;membrane;ribosome	RNA binding;structural molecule activity	Pf01248	6206	ENSG00000112306.7	RPS12	6	Cytoplasmic Ribosomal Proteins	Ribosome	Peptide chain elongation; Eukaryotic Translation Termination; Viral mRNA Translation; Formation of the ternary complex, and subsequently, the 43S complex; L13a-mediated translational silencing of Ceruloplasmin expression; Selenocysteine synthesis; Nonsense Mediated Decay (NMD) independent of the Exon Junction Complex (EJC); Nonsense Mediated Decay (NMD) enhanced by the Exon Junction Complex (EJC)…	38	37.74	0		6.98124e+07	1.07477e+08	1.05213e+08	9.41675e+07	1.72465e+07	6.92676e+07	1.11867e+08	1.25241e+08	1.02125e+08	2.38667e+07	1.07686e+07	1.4023e+07	1.30222	0.380969
n/a	High	Master Protein	P33176	Kinesin-1 heavy chain [OS=Homo sapiens]		0	17	14	92	14	963	109.6	6.51	97.84	cell differentiation;cell organization and biogenesis;cellular component movement;metabolic process;regulation of biological process;transport	cytoplasm;cytoskeleton;cytosol;membrane	catalytic activity;motor activity;nucleotide binding;protein binding	Pf00225, Pf01576, Pf02463, Pf03999, Pf04111, Pf04156, Pf05483, Pf05557, Pf05622, Pf06160, Pf07111, Pf07888, Pf10174, Pf12128, Pf13514, Pf13851, Pf14915	3799	ENSG00000170759.10	KIF5B	10	Insulin Signaling	Endocytosis; Dopaminergic synapse	COPI-dependent Golgi-to-ER retrograde traffic; Kinesins; RHO GTPases activate KTN1; Insulin processing; MHC class II antigen presentation	21	50.52	0		7.57652e+07	1.03586e+08	1.02817e+08	9.40562e+07	1.29375e+07	3.24035e+07	4.77992e+07	5.12858e+07	4.38295e+07	8.20383e+06	2.23483e+07	2.91017e+07	1.30218	0.380934
n/a	High	Master Protein	P08575-2	Isoform 2 of Receptor-type tyrosine-protein phosphatase C [OS=Homo sapiens]		0	35	40	278	40	1143	130.8	6.33	183.64	cell differentiation;cell proliferation;cellular homeostasis;defense response;metabolic process;regulation of biological process;response to stimulus;transport	cell surface;membrane	catalytic activity;protein binding;receptor activity;signal transducer activity	Pf00041, Pf00102, Pf12453, Pf12567	5788		PTPRC	1	B Cell Receptor Signaling Pathway; T-Cell antigen Receptor (TCR) pathway during Staphylococcus aureus infection; EPO Receptor Signaling; Interferon type I signaling pathways			4	161.83	0		7.33409e+07	1.14335e+08	9.28211e+07	9.34991e+07	1.67428e+07	6.21972e+07	1.0595e+08	1.17237e+08	9.51279e+07	2.37371e+07	3.08436e+06	4.00587e+06	1.29877	0.377143
n/a	High	Master Protein	P12259	Coagulation factor V [OS=Homo sapiens]		0	5	12	74	12	2224	251.5	6.05	51.06	cell organization and biogenesis;coagulation;metabolic process;response to stimulus;transport	endoplasmic reticulum;extracellular;Golgi;membrane;organelle lumen	metal ion binding;protein binding	Pf00754, Pf07732	2153	ENSG00000198734.10	F5	1	Blood Clotting Cascade; Complement and Coagulation Cascades	Complement and coagulation cascades	Platelet degranulation ; Post-translational protein phosphorylation; Regulation of Insulin-like Growth Factor (IGF) transport and uptake by Insulin-like Growth Factor Binding Proteins (IGFBPs); Common Pathway of Fibrin Clot Formation; Cargo concentration in the ER; COPII (Coat Protein 2) Mediated Vesicle Transport	20	33.2	0		9.35874e+07	1.0088e+08	8.59499e+07	9.34725e+07	6.09582e+06	9.66673e+07	9.43908e+07	7.54212e+07	8.88264e+07	9.5244e+06	665475	864135	1.29852	0.376871
n/a	High	Master Protein	O60264	SWI/SNF-related matrix-associated actin-dependent regulator of chromatin subfamily A member 5 [OS=Homo sapiens]		0	12	13	94	13	1052	121.8	8.09	59.57	cell organization and biogenesis;metabolic process;regulation of biological process	chromosome;nucleus	catalytic activity;DNA binding;nucleotide binding;protein binding	Pf00176, Pf00270, Pf00271, Pf04851, Pf09110, Pf09111, Pf11496	8467	ENSG00000153147.5	SMARCA5	4			Recruitment and ATM-mediated phosphorylation of repair and signaling proteins at DNA double strand breaks; NoRC negatively regulates rRNA expression; B-WICH complex positively regulates rRNA expression; Deposition of new CENPA-containing nucleosomes at the centromere	14	32.78	0		6.60179e+07	1.26541e+08	8.68372e+07	9.3132e+07	2.51062e+07	5.67362e+07	7.70486e+07	7.86144e+07	7.07997e+07	9.96495e+06	3.32894e+06	4.31594e+06	1.29649	0.374614
n/a	High	Master Protein	Q13155	aminoacyl tRNA synthase complex-interacting multifunctional protein 2 [OS=Homo sapiens]		0	8	3	14	3	320	35.3	8.22	19.45	cell death;cell differentiation;cell organization and biogenesis;development;metabolic process;regulation of biological process	cytoplasm;cytosol;membrane;nucleus	protein binding;structural molecule activity	Pf13410, Pf14497	7965	ENSG00000106305.9	AIMP2	7	Osteoclast Signaling; Transcriptional activation by NRF2		Cytosolic tRNA aminoacylation; SeMet incorporation into proteins	10	13.85	0		8.21865e+07	1.04577e+08	8.98737e+07	9.22124e+07	9.28936e+06	5.02204e+07	7.10469e+07	6.32628e+07	6.151e+07	8.59223e+06	6.16692e+06	7.98581e+06	1.29494	0.37289
n/a	High	Master Protein	P61221	ATP-binding cassette sub-family E member 1 [OS=Homo sapiens]		0	15	10	104	10	599	67.3	8.34	68.95	cell organization and biogenesis;metabolic process;regulation of biological process;transport	cytoplasm;cytosol;membrane;mitochondrion;organelle lumen	catalytic activity;enzyme regulator activity;metal ion binding;nucleotide binding;protein binding	Pf00005, Pf04068, Pf13304, Pf13671	6059	ENSG00000164163.10	ABCE1	4			Interferon alpha/beta signaling	4	24.28	0		7.95454e+07	9.17539e+07	1.01303e+08	9.08673e+07	8.9045e+06	4.05836e+07	6.17563e+07	6.71992e+07	5.6513e+07	1.14809e+07	3.1451e+06	4.06877e+06	1.29368	0.371485
n/a	High	Master Protein	P13797	Plastin-3 [OS=Homo sapiens]		0	32	16	72	12	630	70.8	5.6	94.98	cell organization and biogenesis	cytoplasm;cytosol;membrane	metal ion binding;protein binding	Pf00036, Pf00307, Pf13499	5358	ENSG00000102024.17	PLS3	X				0	34.6	0		6.81892e+07	9.8804e+07	1.01215e+08	8.94027e+07	1.50325e+07	7.87771e+07	1.46284e+08	1.57707e+08	1.27589e+08	3.48289e+07	5.41677e+08	7.00422e+08	1.29306	0.370791
n/a	High	Master Protein	Q96CW1-2	Isoform 2 of AP-2 complex subunit mu [OS=Homo sapiens]		0	17	9	45	9	433	49.4	9.54	21.34	cell organization and biogenesis;cellular component movement;metabolic process;regulation of biological process;response to stimulus;transport	cytosol;membrane	protein binding;transporter activity	Pf00928	1173	ENSG00000161203.13	AP2M1	3	Synaptic Vesicle Pathway; EGF/EGFR Signaling Pathway		Trafficking of GluR2-containing AMPA receptors	8	18.81	0		7.70865e+07	8.95749e+07	9.74504e+07	8.80372e+07	8.38432e+06	9.2842e+07	1.40867e+08	1.65499e+08	1.33069e+08	3.01702e+07	1.58172e+07	2.04507e+07	1.29295	0.370662
n/a	High	Master Protein	Q13126-6	Isoform 6 of S-methyl-5'-thioadenosine phosphorylase [OS=Homo sapiens]		0	24	6	41	6	293	32.4	6.11	32.7	metabolic process;regulation of biological process;response to stimulus	cytosol;nucleus	catalytic activity;protein binding	Pf01048	4507		MTAP	9				0	16.88	0		6.80809e+07	9.83241e+07	9.76618e+07	8.80223e+07	1.41033e+07	2.50486e+07	3.26262e+07	3.87804e+07	3.21517e+07	5.616e+06	2.20646e+08	2.85059e+08	1.29193	0.369527
n/a	High	Master Protein	O95197-2	Isoform 2 of Reticulon-3 [OS=Homo sapiens]		0.009	6	4	21	4	1013	110.6	4.97	2.13	cell death;cell organization and biogenesis;regulation of biological process;transport	endoplasmic reticulum;membrane	protein binding	Pf02453, Pf04093	10313	ENSG00000133318.13	RTN3	11				0	17.62	0	Acetyl [N-Term]	6.23509e+07	9.76249e+07	1.03962e+08	8.79794e+07	1.83059e+07	6.4992e+07	1.17354e+08	1.22654e+08	1.01667e+08	2.60229e+07	2.04264e+06	2.63798e+06	1.29146	0.369
n/a	High	Master Protein	O60701	UDP-glucose 6-dehydrogenase [OS=Homo sapiens]		0	27	12	72	12	494	55	7.12	58.25	metabolic process	cytosol;nucleus	catalytic activity;nucleotide binding	Pf00984, Pf03720, Pf03721	7358	ENSG00000109814.11	UGDH	4	Glucuronidation	Metabolic pathways; Amino sugar and nucleotide sugar metabolism; Pentose and glucuronate interconversions; Ascorbate and aldarate metabolism	Formation of the active cofactor, UDP-glucuronate	10	36.06	0		6.60033e+07	9.90821e+07	9.81457e+07	8.77437e+07	1.53775e+07	2.85777e+07	5.59391e+07	6.15766e+07	4.86978e+07	1.44121e+07	2.54316e+08	3.27964e+08	1.2896	0.366918
n/a	High	Master Protein	P61247	40S ribosomal protein S3a [OS=Homo sapiens]		0	45	13	64	13	264	29.9	9.73	58.86	cell differentiation;cell organization and biogenesis;metabolic process;regulation of biological process;transport	cytoplasm;cytosol;endoplasmic reticulum;nucleus;ribosome	protein binding;RNA binding;structural molecule activity	Pf01015	6189	ENSG00000145425.9	RPS3A	4	Cytoplasmic Ribosomal Proteins	Ribosome	Peptide chain elongation; Eukaryotic Translation Termination; Viral mRNA Translation; Formation of the ternary complex, and subsequently, the 43S complex; L13a-mediated translational silencing of Ceruloplasmin expression; Selenocysteine synthesis; Nonsense Mediated Decay (NMD) independent of the Exon Junction Complex (EJC); Nonsense Mediated Decay (NMD) enhanced by the Exon Junction Complex (EJC)…	38	38.94	0		6.84559e+07	9.52945e+07	9.87853e+07	8.75119e+07	1.35498e+07	6.20097e+07	1.01451e+08	1.16667e+08	9.33759e+07	2.30327e+07	1.22886e+06	1.58291e+06	1.28811	0.365258
n/a	High	Master Protein	P13611	Versican core protein [OS=Homo sapiens]		0.01	0	1	1	1	3396	372.6	4.51	1.87	cell differentiation;cell organization and biogenesis;cellular component movement;development;metabolic process	extracellular;membrane;organelle lumen	metal ion binding;protein binding;structural molecule activity	Pf00008, Pf00059, Pf00084, Pf00193, Pf07645, Pf12947	1462	ENSG00000038427.15	VCAN	5	Spinal Cord Injury	Cell adhesion molecules (CAMs)	ECM proteoglycans; Post-translational protein phosphorylation; A tetrasaccharide linker sequence is required for GAG synthesis; Regulation of Insulin-like Growth Factor (IGF) transport and uptake by Insulin-like Growth Factor Binding Proteins (IGFBPs); Dermatan sulfate biosynthesis; Defective CHSY1 causes TPBS; Defective B4GALT7 causes EDS, progeroid type; Defective B3GALT6 causes EDSP2 and SEMDJ…	26		0		6.69347e+07	9.80962e+07	9.739e+07	8.74736e+07	1.45261e+07	5.66431e+07	8.89504e+07	9.16336e+07	7.90757e+07	1.59e+07	2.10424e+07	2.7096e+07	1.28768	0.364778
n/a	High	Master Protein	Q8NBU5	ATPase family aaa domain-containing protein 1 [OS=Homo sapiens]		0	14	6	40	6	361	40.7	6.9	20.49	metabolic process;regulation of biological process;response to stimulus	membrane;mitochondrion;nucleus	catalytic activity;nucleotide binding;RNA binding	Pf00004, Pf00910, Pf01078, Pf05496, Pf06068, Pf07724, Pf07726, Pf13173, Pf13191, Pf13207, Pf13479	84896	ENSG00000283024.1; ENSG00000138138.13	ATAD1	10; CHR_HG2334_PATCH				0	8.95	0.00123762		6.6996e+07	1.00373e+08	9.16639e+07	8.63443e+07	1.41357e+07	5.55716e+07	1.01057e+08	1.09706e+08	8.87782e+07	2.37447e+07	3.87085e+07	4.98358e+07	1.28746	0.364532
n/a	High	Master Protein	Q9Y3I0	tRNA-splicing ligase RtcB homolog [OS=Homo sapiens]		0	14	8	115	8	505	55.2	7.23	98.11	metabolic process	cytoplasm;cytosol;membrane;nucleus	catalytic activity;metal ion binding;nucleotide binding;protein binding;RNA binding	Pf01139	51493	ENSG00000100220.11	C22orf28; RTCB	22			tRNA processing in the nucleus	3	33.5	0		7.00302e+07	9.6597e+07	8.92688e+07	8.52987e+07	1.12033e+07	5.90734e+07	8.1064e+07	8.98573e+07	7.66649e+07	1.29467e+07	9.01034e+06	1.15902e+07	1.28632	0.363249
		Master Protein	Q5VST9-6	Isoform 5 of Obscurin [OS=Homo sapiens]			1	14	55	14	8483	924.4	5.97		cell organization and biogenesis;development;metabolic process;regulation of biological process;response to stimulus	cytosol;membrane	catalytic activity;metal ion binding;nucleotide binding;protein binding;structural molecule activity	Pf00041, Pf00047, Pf00069, Pf00169, Pf00621, Pf07654, Pf07679, Pf07686, Pf07714, Pf13895, Pf13927	84033		OBSCN	1				0	12.54	0		6.75583e+07	9.78003e+07	8.9528e+07	8.49622e+07	1.27614e+07	4.41489e+07	8.17889e+07	8.21672e+07	6.93683e+07	1.78335e+07	4.35614e+07	5.60158e+07	1.2859	0.362781
n/a	High	Master Protein	P11388-1	DNA topoisomerase 2-alpha [OS=Homo sapiens]		0	8	13	88	13	1531	174.3	8.72	62.47	cell differentiation;cell division;cell organization and biogenesis;metabolic process;regulation of biological process;response to stimulus	chromosome;cytoplasm;nucleus	catalytic activity;DNA binding;metal ion binding;nucleotide binding;protein binding;RNA binding	Pf00204, Pf00521, Pf01751, Pf02518, Pf08070	7153	ENSG00000131747.14	TOP2A	17	Gastric Cancer Network 1; Gastric cancer network 2; Retinoblastoma (RB) in Cancer	Platinum drug resistance	SUMOylation of DNA replication proteins; Transcription of E2F targets under negative control by DREAM complex	14	34.24	0		7.23762e+07	9.08245e+07	9.06071e+07	8.46026e+07	8.64584e+06	4.9549e+07	7.72708e+07	7.75929e+07	6.81375e+07	1.31448e+07	6.38116e+06	8.20301e+06	1.2855	0.362333
n/a	High	Master Protein	Q6UB35-1	Monofunctional C1-tetrahydrofolate synthase, mitochondrial [OS=Homo sapiens]		0	11	8	69	8	978	105.7	8.06	36.5	metabolic process	membrane;mitochondrion;organelle lumen	catalytic activity;nucleotide binding;protein binding	Pf00763, Pf01268, Pf02882	25902	ENSG00000120254.15	MTHFD1L	6	One Carbon Metabolism; Trans-sulfuration and one carbon metabolism	Metabolic pathways; One carbon pool by folate	Metabolism of folate and pterines	8	25.84	0		7.61566e+07	7.95529e+07	9.68238e+07	8.41778e+07	9.04897e+06	1.04872e+08	1.44657e+08	1.526e+08	1.34043e+08	2.08802e+07	1.32634e+06	1.70499e+06	1.28549	0.362321
n/a	High	Master Protein	P63010-2	Isoform 2 of AP-2 complex subunit beta [OS=Homo sapiens]		0	19	17	119	10	951	105.6	5.34	95.67	cell organization and biogenesis;cellular component movement;metabolic process;regulation of biological process;response to stimulus;transport	cytoplasm;cytosol;membrane	protein binding;transporter activity	Pf01602, Pf02883, Pf09066, Pf12717, Pf13646	163	ENSG00000006125.17	AP2B1	17	Synaptic Vesicle Pathway; EGF/EGFR Signaling Pathway			2	48.36	0		7.71162e+07	7.79615e+07	9.64612e+07	8.38463e+07	8.92676e+06	5.34603e+07	8.20036e+07	7.88617e+07	7.14419e+07	1.27794e+07	1.22277e+07	1.57045e+07	1.28434	0.361032
n/a	High	Master Protein	P19367-1	Hexokinase-1 [OS=Homo sapiens]		0	11	9	66	3	917	102.4	6.8	43.23	cellular homeostasis;metabolic process;regulation of biological process	cytosol;membrane;mitochondrion	catalytic activity;nucleotide binding;protein binding	Pf00349, Pf03727	3098	ENSG00000156515.21	HK1	10	Cori Cycle; Photodynamic therapy-induced HIF-1 survival signaling; Glycolysis and Gluconeogenesis; Glucuronidation	Galactose metabolism; Insulin signaling pathway; Amino sugar and nucleotide sugar metabolism; Starch and sucrose metabolism; Central carbon metabolism in cancer; Glycolysis / Gluconeogenesis; Type II diabetes mellitus; Metabolic pathways; Carbon metabolism; Carbohydrate digestion and absorption; HIF-1 signaling pathway; Fructose and mannose metabolism; Neomycin, kanamycin and gentamicin biosynthe…	Glycolysis; Defective HK1 causes hexokinase deficiency (HK deficiency)	25	28.9	0		6.21397e+07	9.7024e+07	9.17041e+07	8.36226e+07	1.53452e+07	7.60681e+07	1.06829e+08	1.07688e+08	9.68618e+07	1.47076e+07	1.83266e+07	2.35187e+07	1.28331	0.359869
n/a	High	Master Protein	Q99439	Calponin-2 [OS=Homo sapiens]		0.001	13	4	36	3	309	33.7	7.33	10.96	cell organization and biogenesis;regulation of biological process;response to stimulus;transport	cytoskeleton;extracellular;membrane;organelle lumen	protein binding	Pf00307, Pf00402	1265	ENSG00000064666.14	CNN2	19	Myometrial Relaxation and Contraction Pathways		Gene and protein expression by JAK-STAT signaling after Interleukin-12 stimulation; Neutrophil degranulation; Interleukin-12 family signaling	8	7.13	0.00106952		9.82342e+07	5.0786e+07	9.90035e+07	8.26746e+07	2.25508e+07	5.57853e+07	7.62959e+07	7.65268e+07	6.9536e+07	9.72367e+06	1.06922e+07	1.37144e+07	1.28266	0.359141
n/a	High	Master Protein	Q13085-2	Isoform 2 of Acetyl-CoA carboxylase 1 [OS=Homo sapiens]		0	5	10	62	9	2288	259.5	6.58	42.75	cell organization and biogenesis;metabolic process;regulation of biological process;response to stimulus;transport	cytoskeleton;cytosol;mitochondrion	catalytic activity;metal ion binding;nucleotide binding;protein binding	Pf00289, Pf00364, Pf01039, Pf02222, Pf02655, Pf02785, Pf02786, Pf07478, Pf08326, Pf13535, Pf15632	31	ENSG00000278540.4; ENSG00000275176.4	ACACA	17; CHR_HSCHR17_7_CTG4	AMP-activated Protein Kinase (AMPK) Signaling; Sterol Regulatory Element-Binding Proteins (SREBP) signalling; Leptin signaling pathway; Corticotropin-releasing hormone signaling pathway; Mesodermal Commitment Pathway; Fatty Acid Biosynthesis; VEGFA-VEGFR2 Signaling Pathway; Focal Adhesion-PI3K-Akt-mTOR-signaling pathway; Leptin and adiponectin			9	27.04	0		7.52275e+07	8.67289e+07	8.58392e+07	8.25985e+07	5.22472e+06	1.9706e+08	2.86537e+08	3.1411e+08	2.65902e+08	4.99634e+07	1.69331e+07	2.17168e+07	1.28251	0.358971
n/a	High	Master Protein	P30086	phosphatidylethanolamine-binding protein 1 [OS=Homo sapiens]		0	34	5	37	5	187	21	7.53	17.53	metabolic process;regulation of biological process;response to stimulus	cytoplasm;cytosol;nucleus	enzyme regulator activity;nucleotide binding;protein binding;RNA binding	Pf01161	5037	ENSG00000089220.4	PEBP1	12	EGF/EGFR Signaling Pathway		Paradoxical activation of RAF signaling by kinase inactive BRAF; Signaling by BRAF and RAF fusions; MAP2K and MAPK activation; Negative regulation of MAPK pathway; Signaling by RAS mutants; Signaling by high-kinase activity BRAF mutants; Signaling by moderate kinase activity BRAF mutants; Interleukin-20 family signaling	19	29.75	0		6.8686e+07	9.26194e+07	8.5641e+07	8.23155e+07	1.00497e+07	3.31391e+07	5.66759e+07	5.83356e+07	4.93836e+07	1.15065e+07	2.24494e+08	2.87915e+08	1.28251	0.358969
n/a	High	Master Protein	P21796	voltage-dependent anion-selective channel protein 1 [OS=Homo sapiens]		0	52	14	101	14	283	30.8	8.54	112.03	cell communication;cell death;cell differentiation;defense response;metabolic process;regulation of biological process;response to stimulus;transport	membrane;mitochondrion;nucleus	protein binding;transporter activity	Pf01459	7416	ENSG00000213585.10	VDAC1	5		Influenza A; cGMP-PKG signaling pathway; HTLV-I infection; Calcium signaling pathway; Parkinson's disease; Huntington's disease; NOD-like receptor signaling pathway	Mitochondrial calcium ion transport; Ub-specific processing proteases; Mitochondrial protein import; Pink/Parkin Mediated Mitophagy	16	73.13	0		6.0231e+07	9.36548e+07	9.29403e+07	8.22754e+07	1.55904e+07	5.10776e+07	1.07606e+08	9.76364e+07	8.54401e+07	2.46364e+07	1.53072e+06	1.96289e+06	1.28233	0.358766
n/a	High	Master Protein	Q92614-1	Unconventional myosin-XVIIIa [OS=Homo sapiens]		0	10	20	108	20	2054	233	6.3	81.02	cell differentiation;cell organization and biogenesis;cellular component movement;metabolic process;regulation of biological process;transport	cell surface;cytoplasm;cytoskeleton;Golgi;membrane	catalytic activity;DNA binding;motor activity;nucleotide binding;protein binding;RNA binding;structural molecule activity;transporter activity	Pf00038, Pf00063, Pf00595, Pf00769, Pf01496, Pf01576, Pf02463, Pf02841, Pf03962, Pf04111, Pf04156, Pf04502, Pf04615, Pf05483, Pf05557, Pf05622, Pf05701, Pf05911, Pf06008, Pf06160, Pf06785, Pf06818, Pf07111, Pf07888, Pf08286, Pf09726, Pf09728, Pf09731, Pf09789, Pf10174, Pf12128, Pf12252, Pf12718, Pf13514, Pf13851, Pf14643, Pf14662, Pf14992, Pf15066, Pf15070, Pf15397	399687	ENSG00000196535.15	MYO18A	17			Signaling by cytosolic FGFR1 fusion mutants	6	52.67	0		6.04855e+07	1.03157e+08	8.20844e+07	8.1909e+07	1.74211e+07	6.67879e+07	1.00946e+08	1.07867e+08	9.18669e+07	1.79572e+07	1.2827e+08	1.64344e+08	1.28123	0.357526
n/a	High	Master Protein	P62906	60S ribosomal protein L10A [OS=Homo sapiens]		0	40	10	54	10	217	24.8	9.94	35.02	cell organization and biogenesis;metabolic process;response to stimulus;transport	cytosol;membrane;nucleus;ribosome	protein binding;RNA binding;structural molecule activity	Pf00687	4736	ENSG00000198755.10	RPL10A	6	Cytoplasmic Ribosomal Proteins	Ribosome	Peptide chain elongation; Eukaryotic Translation Termination; Viral mRNA Translation; L13a-mediated translational silencing of Ceruloplasmin expression; Nonsense Mediated Decay (NMD) independent of the Exon Junction Complex (EJC); Selenocysteine synthesis; Nonsense Mediated Decay (NMD) enhanced by the Exon Junction Complex (EJC); GTP hydrolysis and joining of the 60S ribosomal subunit; Major path…	34	27.35	0		6.86356e+07	8.88117e+07	8.80195e+07	8.18223e+07	9.32999e+06	5.72981e+07	8.82744e+07	9.64766e+07	8.0683e+07	1.68713e+07	1.25774e+06	1.61124e+06	1.28107	0.357344
n/a	High	Master Protein	P14868	Aspartate--tRNA ligase, cytoplasmic [OS=Homo sapiens]		0	22	10	68	10	501	57.1	6.55	44.81	cell organization and biogenesis;metabolic process	cytoplasm;cytosol;membrane	catalytic activity;nucleotide binding;protein binding;RNA binding	Pf00152, Pf01336	1615	ENSG00000115866.10	DARS	2	Alanine and aspartate metabolism	Aminoacyl-tRNA biosynthesis	Cytosolic tRNA aminoacylation; SeMet incorporation into proteins	10	23.85	0		7.06488e+07	9.13334e+07	8.33675e+07	8.17833e+07	8.51845e+06	2.89368e+07	5.08223e+07	5.01458e+07	4.33016e+07	1.01612e+07	3.80079e+08	4.85393e+08	1.27708	0.352854
n/a	High	Master Protein	P31689-1	DnaJ homolog subfamily A member 1 [OS=Homo sapiens]		0	35	12	85	12	397	44.8	7.08	92.92	cellular component movement;metabolic process;regulation of biological process;response to stimulus;transport	cytoplasm;cytoskeleton;cytosol;endoplasmic reticulum;membrane;mitochondrion;nucleus	enzyme regulator activity;metal ion binding;nucleotide binding;protein binding	Pf00226, Pf00684, Pf01556	3301	ENSG00000086061.15	DNAJA1	9	Exercise-induced Circadian Regulation	Protein processing in endoplasmic reticulum	HSP90 chaperone cycle for steroid hormone receptors (SHR)	5	48.07	0		8.47766e+07	7.80312e+07	8.23589e+07	8.17222e+07	2.79035e+06	9.9079e+07	1.14333e+08	1.33293e+08	1.15568e+08	1.3995e+07	546309	697669	1.27706	0.352826
n/a	High	Master Protein	P25786-1	Proteasome subunit alpha type-1 [OS=Homo sapiens]		0	41	11	59	11	263	29.5	6.61	24.91	metabolic process;regulation of biological process;response to stimulus;transport	cytoplasm;cytosol;nucleus;proteasome	catalytic activity;protein binding;RNA binding	Pf00227, Pf10584	5682	ENSG00000129084.17	PSMA1	11	Proteasome Degradation	Proteasome	Regulation of RAS by GAPs; CDT1 association with the CDC6:ORC:origin complex; Downstream TCR signaling; UCH proteinases; NIK-->noncanonical NF-kB signaling; Hh mutants that don't undergo autocatalytic processing are degraded by ERAD; SCF-beta-TrCP mediated degradation of Emi1; Cross-presentation of soluble exogenous antigens (endosomes); Separation of Sister Chromatids; Vpu mediated degradation o…	150	27.64	0		9.10019e+07	6.36098e+07	9.03671e+07	8.16596e+07	1.27658e+07	4.70936e+07	6.63202e+07	5.24949e+07	5.53029e+07	8.09649e+06	9.03311e+06	1.15267e+07	1.27605	0.351682
n/a	High	Master Protein	P11940-1	Polyadenylate-binding protein 1 [OS=Homo sapiens]		0	22	13	78	9	636	70.6	9.5	61.99	metabolic process;regulation of biological process	cytoplasm;cytosol;membrane;nucleus;spliceosomal complex	protein binding;RNA binding;translation regulator activity	Pf00076, Pf00658, Pf13893, Pf14259	26986	ENSG00000070756.15	PABPC1	8	Translation Factors; Endoderm Differentiation	mRNA surveillance pathway; RNA degradation; RNA transport	AUF1 (hnRNP D0) binds and destabilizes mRNA; L13a-mediated translational silencing of Ceruloplasmin expression; Regulation of expression of SLITs and ROBOs; Nonsense Mediated Decay (NMD) independent of the Exon Junction Complex (EJC); Translation initiation complex formation; Nonsense Mediated Decay (NMD) enhanced by the Exon Junction Complex (EJC); Deadenylation of mRNA	24	42.07	0		6.58612e+07	8.72817e+07	9.00943e+07	8.10791e+07	1.08218e+07	3.92812e+07	6.23127e+07	5.97675e+07	5.37871e+07	1.03097e+07	2.25739e+06	2.87534e+06	1.27375	0.349078
n/a	High	Master Protein	Q15393-1	Splicing factor 3B subunit 3 [OS=Homo sapiens]		0	13	15	110	15	1217	135.5	5.26	54.04	cell organization and biogenesis;metabolic process;regulation of biological process	nucleus;spliceosomal complex	protein binding;RNA binding	Pf03178, Pf10433	23450	ENSG00000189091.12	SF3B3	16	mRNA Processing	Spliceosome	mRNA Splicing - Major Pathway; mRNA Splicing - Minor Pathway	7	21.73	0		6.97861e+07	9.15601e+07	8.09148e+07	8.07537e+07	8.88989e+06	4.65889e+07	6.45615e+07	7.5175e+07	6.21085e+07	1.17984e+07	2.88766e+06	3.67782e+06	1.27363	0.34895
n/a	High	Master Protein	P48444	Coatomer subunit delta [OS=Homo sapiens]		0	18	10	71	10	511	57.2	6.21	26.85	response to stimulus;transport	cytoplasm;cytosol;endoplasmic reticulum;Golgi;membrane	RNA binding	Pf00928	372	ENSG00000095139.13	ARCN1	11	miR-517 relationship with ARCN1 and USP1		COPI-dependent Golgi-to-ER retrograde traffic; COPI-mediated anterograde transport	12	15.73	0		6.96195e+07	8.19441e+07	8.87807e+07	8.01148e+07	7.92873e+06	5.25701e+07	8.41957e+07	7.86735e+07	7.18131e+07	1.37923e+07	1.65973e+07	2.11385e+07	1.27361	0.348929
n/a	High	Master Protein	Q9NWB6-2	Isoform 2 of Arginine and glutamate-rich protein 1 [OS=Homo sapiens]		0.005	12	4	26	4	273	32.9	10.51	4.58	metabolic process;regulation of biological process	mitochondrion	protein binding		55082		ARGLU1	13				0	6.13	0.00098912		8.5955e+07	7.09093e+07	8.33194e+07	8.00612e+07	6.56022e+06	6.15649e+07	8.20255e+07	7.93311e+07	7.43072e+07	9.07703e+06	5.14177e+06	6.54757e+06	1.27341	0.348694
n/a	High	Master Protein	Q14247-1	Src substrate cortactin [OS=Homo sapiens]		0	21	11	69	11	550	61.5	5.4	46.58	cell organization and biogenesis;cellular component movement;regulation of biological process;transport	cytoplasm;cytoskeleton;cytosol;Golgi;membrane	protein binding	Pf00018, Pf02218, Pf07653, Pf14604	2017	ENSG00000085733.15	CTTN	11	Pathogenic Escherichia coli infection; Hepatitis C and Hepatocellular Carcinoma	Pathogenic Escherichia coli infection; Bacterial invasion of epithelial cells; Shigellosis; Proteoglycans in cancer; Tight junction	RHO GTPases activate PAKs; Clathrin-mediated endocytosis	14	24.86	0		7.78754e+07	8.05946e+07	8.11105e+07	7.98601e+07	1.41917e+06	7.55377e+07	8.30634e+07	8.04893e+07	7.96968e+07	3.12304e+06	3.96312e+07	5.04241e+07	1.27233	0.347475
n/a	High	Master Protein	P11215-2	Isoform 2 of Integrin alpha-M [OS=Homo sapiens]		0	36	38	341	36	1153	127.2	7.23	309.51	cell differentiation;cell organization and biogenesis;cellular component movement;regulation of biological process;response to stimulus;transport	cell surface;membrane	metal ion binding;protein binding	Pf00092, Pf00357, Pf01839, Pf08441, Pf13519	3684	ENSG00000169896.16	ITGAM	16	Integrin-mediated Cell Adhesion; Focal Adhesion; Microglia Pathogen Phagocytosis Pathway; TYROBP Causal Network			4	196.61	0		8.02421e+07	7.36051e+07	8.52832e+07	7.97101e+07	4.78236e+06	4.58341e+07	8.16689e+07	8.65095e+07	7.13375e+07	1.81416e+07	98160.4	124853	1.27193	0.347014
n/a	High	Master Protein	Q92616	eIF-2-alpha kinase activator GCN1 [OS=Homo sapiens]		0	7	20	73	20	2671	292.6	7.47	29.08	cell communication;metabolic process;regulation of biological process;response to stimulus	cytoplasm;cytosol;membrane;ribosome	enzyme regulator activity;protein binding;RNA binding	Pf12074, Pf13646	10985		GCN1L1; GCN1	12				0	30.12	0	Acetyl [N-Term]	7.02802e+07	9.61615e+07	7.22353e+07	7.9559e+07	1.17668e+07	3.83966e+07	6.44035e+07	6.53966e+07	5.60655e+07	1.25004e+07	2.57214e+07	3.26609e+07	1.2698	0.344597
n/a	High	Master Protein	P61353	60S ribosomal protein L27 [OS=Homo sapiens]		0.001	33	6	52	6	136	15.8	10.56	11.58	cell organization and biogenesis;metabolic process;transport	cytosol;membrane;nucleus;ribosome	RNA binding;structural molecule activity	Pf00467, Pf01777	6155	ENSG00000131469.12	RPL27	17	Cytoplasmic Ribosomal Proteins	Ribosome	Peptide chain elongation; Eukaryotic Translation Termination; Viral mRNA Translation; L13a-mediated translational silencing of Ceruloplasmin expression; Nonsense Mediated Decay (NMD) independent of the Exon Junction Complex (EJC); Selenocysteine synthesis; Nonsense Mediated Decay (NMD) enhanced by the Exon Junction Complex (EJC); GTP hydrolysis and joining of the 60S ribosomal subunit; Major path…	34	22.36	0		9.00902e+07	6.99058e+07	7.8638e+07	7.95447e+07	8.26516e+06	1.01214e+08	1.09437e+08	8.00435e+07	9.68981e+07	1.23817e+07	2.12368e+07	2.69479e+07	1.26892	0.343607
n/a	High	Master Protein	Q13838-2	Isoform 2 of Spliceosome RNA helicase DDX39B [OS=Homo sapiens]		0	16	9	53	8	443	50.6	5.88	17.6	cell organization and biogenesis;metabolic process;regulation of biological process;transport	cytoplasm;nucleus;spliceosomal complex	catalytic activity;nucleotide binding;protein binding;RNA binding	Pf00270, Pf00271, Pf14617	7919		DDX39B	6				0	17.73	0		9.48468e+07	7.65252e+07	6.70604e+07	7.94775e+07	1.15343e+07	1.20724e+08	1.83091e+08	1.88153e+08	1.63989e+08	3.06631e+07	2.94425e+07	3.73553e+07	1.26875	0.343411
n/a	High	Master Protein	P61160-1	Actin-related protein 2 [OS=Homo sapiens]		0	24	10	56	10	394	44.7	6.74	21.48	cell division;cell organization and biogenesis;cellular component movement;regulation of biological process;response to stimulus;transport	cytoplasm;cytoskeleton;cytosol;extracellular;membrane;organelle lumen	nucleotide binding;protein binding;structural molecule activity	Pf00022	10097	ENSG00000138071.13	ACTR2	2	Association Between Physico-Chemical Features and Toxicity Associated Pathways; ESC Pluripotency Pathways		EPHB-mediated forward signaling; Neutrophil degranulation; Clathrin-mediated endocytosis; RHO GTPases Activate WASPs and WAVEs; Regulation of actin dynamics for phagocytic cup formation	18	26.93	0		6.4897e+07	9.79172e+07	7.48018e+07	7.92053e+07	1.38354e+07	4.8462e+07	8.18728e+07	8.6793e+07	7.23759e+07	1.70286e+07	933193	1.1834e+06	1.26811	0.342684
n/a	High	Master Protein	Q14103	heterogeneous nuclear ribonucleoprotein D0 [OS=Homo sapiens]		0	23	7	44	5	355	38.4	7.81	77.15	metabolic process;regulation of biological process;response to stimulus	cytoplasm;cytosol;nucleus	DNA binding;protein binding;RNA binding	Pf00076, Pf13893, Pf14259	3184	ENSG00000138668.18	HNRNPD	4	mRNA Processing		mRNA Splicing - Major Pathway	5	31.46	0		7.02488e+07	7.94487e+07	8.61602e+07	7.86192e+07	6.52222e+06	5.83139e+07	8.55816e+07	9.04428e+07	7.81128e+07	1.41399e+07	2.88001e+07	3.652e+07	1.26805	0.342612
n/a	High	Master Protein	Q9P2E9-1	Ribosome-binding protein 1 [OS=Homo sapiens]		0	6	9	72	8	1410	152.4	8.6	75.24	cell differentiation;metabolic process;regulation of biological process;transport	endoplasmic reticulum;membrane;ribosome	receptor activity;RNA binding	Pf03276, Pf04156, Pf05104, Pf09606, Pf12128, Pf13779	6238		RRBP1	20	Ectoderm Differentiation	Protein processing in endoplasmic reticulum		2	31.09	0		4.528e+07	1.24105e+08	6.58269e+07	7.84041e+07	3.33866e+07	7.24221e+07	1.0988e+08	1.2501e+08	1.02437e+08	2.21045e+07	2.98762e+07	3.78673e+07	1.26747	0.341957
n/a	High	Master Protein	P23284	peptidyl-prolyl cis-trans isomerase B [OS=Homo sapiens]		0	48	11	76	11	216	23.7	9.41	45.74	metabolic process;regulation of biological process	endoplasmic reticulum;membrane;nucleus;organelle lumen	catalytic activity;protein binding;RNA binding	Pf00160	5479	ENSG00000166794.4	PPIB	15	Prolactin Signaling Pathway		Collagen biosynthesis and modifying enzymes	4	26.24	0		6.12027e+07	8.2686e+07	8.73825e+07	7.70904e+07	1.13967e+07	1.12122e+08	1.89812e+08	1.99294e+08	1.67076e+08	3.90508e+07	1.9824e+07	2.50547e+07	1.26386	0.337832
n/a	High	Master Protein	P61513	60S ribosomal protein L37a [OS=Homo sapiens]		0	52	5	63	5	92	10.3	10.43	70.14	cell organization and biogenesis;metabolic process;transport	cytosol;nucleus;ribosome	metal ion binding;protein binding;RNA binding;structural molecule activity	Pf01780	6168	ENSG00000197756.9	RPL37A	2	Cytoplasmic Ribosomal Proteins	Ribosome	Peptide chain elongation; Eukaryotic Translation Termination; Viral mRNA Translation; L13a-mediated translational silencing of Ceruloplasmin expression; Nonsense Mediated Decay (NMD) independent of the Exon Junction Complex (EJC); Selenocysteine synthesis; Nonsense Mediated Decay (NMD) enhanced by the Exon Junction Complex (EJC); GTP hydrolysis and joining of the 60S ribosomal subunit; Major path…	34	23.68	0		1.08104e+08	3.63448e+07	8.55787e+07	7.66757e+07	2.99642e+07	1.08286e+08	9.17838e+07	7.85863e+07	9.28853e+07	1.21497e+07	3.87653e+06	4.89534e+06	1.26282	0.336644
n/a	High	Master Protein	O94906-1	Pre-mRNA-processing factor 6 [OS=Homo sapiens]		0	13	13	87	13	941	106.9	8.25	51.97	cell organization and biogenesis;metabolic process;regulation of biological process	membrane;nucleus;spliceosomal complex	protein binding;RNA binding	Pf06424, Pf13414, Pf14559	24148	ENSG00000101161.7	PRPF6	20	mRNA Processing	Spliceosome	mRNA Splicing - Major Pathway; mRNA Splicing - Minor Pathway	7	15.67	0		6.1124e+07	8.75433e+07	8.10129e+07	7.65601e+07	1.12358e+07	4.26127e+07	7.00131e+07	7.03611e+07	6.09956e+07	1.29994e+07	3.14761e+08	3.97385e+08	1.2625	0.336279
n/a	High	Master Protein	Q9P0L0	vesicle-associated membrane protein-associated protein A [OS=Homo sapiens]		0.009	19	5	26	5	249	27.9	8.62	1.98	cell death;cell organization and biogenesis;metabolic process;regulation of biological process;response to stimulus;transport	cytoskeleton;endoplasmic reticulum;membrane;nucleus	protein binding;signal transducer activity	Pf00635	9218	ENSG00000101558.13	VAPA	18	Exercise-induced Circadian Regulation	Tight junction	Neutrophil degranulation; Sphingolipid de novo biosynthesis	9	15.03	0		8.63245e+07	5.38842e+07	8.88569e+07	7.63552e+07	1.5923e+07	8.93544e+07	1.1044e+08	1.13257e+08	1.04351e+08	1.06661e+07	3.36953e+07	4.25235e+07	1.262	0.335714
n/a	High	Master Protein	O75643-1	U5 small nuclear ribonucleoprotein 200 kDa helicase [OS=Homo sapiens]		0	10	23	91	23	2136	244.4	6.06	56.96	cell differentiation;cell organization and biogenesis;metabolic process	membrane;nucleus;spliceosomal complex	catalytic activity;DNA binding;nucleotide binding;protein binding;RNA binding	Pf00270, Pf00271, Pf02889, Pf04851	23020	ENSG00000144028.14	SNRNP200	2		Spliceosome	mRNA Splicing - Major Pathway; mRNA Splicing - Minor Pathway	6	30.97	0		7.32287e+07	6.79824e+07	8.75344e+07	7.62485e+07	8.26273e+06	6.28695e+07	9.02367e+07	1.07846e+08	8.69842e+07	1.85051e+07	8.15888e+06	1.02697e+07	1.25871	0.331952
n/a	High	Master Protein	Q96AG4	Leucine-rich repeat-containing protein 59 [OS=Homo sapiens]		0.001	20	7	33	7	307	34.9	9.57	13.73		endoplasmic reticulum;membrane;nucleus	protein binding;RNA binding	Pf12799, Pf13855	55379	ENSG00000108829.9	LRRC59	17				0	8.35	0.00117925		9.39012e+07	4.57886e+07	8.7652e+07	7.57806e+07	2.13605e+07	1.30359e+08	1.66945e+08	1.13434e+08	1.36913e+08	2.23319e+07	4.2116e+06	5.29739e+06	1.25781	0.330914
n/a	High	Master Protein	Q9P2B2	prostaglandin F2 receptor negative regulator [OS=Homo sapiens]		0.002	5	5	17	5	879	98.5	6.61	5.65	cell organization and biogenesis	cell surface;endoplasmic reticulum;Golgi;membrane	protein binding	Pf07679	5738	ENSG00000134247.9	PTGFRN	1				0	8.79	0.00122399		5.72421e+07	9.47122e+07	7.38558e+07	7.52701e+07	1.53297e+07	2.42068e+07	3.24911e+07	3.74455e+07	3.13811e+07	5.46139e+06	4.75352e+06	5.97488e+06	1.25694	0.329912
n/a	High	Master Protein	Q03135	Caveolin-1 [OS=Homo sapiens]		0	36	6	74	6	178	20.5	6.02	61.69	cell communication;cell differentiation;cell organization and biogenesis;cellular component movement;cellular homeostasis;metabolic process;regulation of biological process;response to stimulus;transport	endoplasmic reticulum;endosome;Golgi;membrane	enzyme regulator activity;protein binding;structural molecule activity	Pf01146	857	ENSG00000105974.11	CAV1	7	Androgen receptor signaling pathway; Integrin-mediated Cell Adhesion; Focal Adhesion; TGF-beta Signaling Pathway; VEGFA-VEGFR2 Signaling Pathway; EGF/EGFR Signaling Pathway	Viral myocarditis; Focal adhesion; Bacterial invasion of epithelial cells; Endocytosis; Proteoglycans in cancer	Triglyceride catabolism; Basigin interactions; eNOS activation; NOSTRIN mediated eNOS trafficking; Disassembly of the destruction complex and recruitment of AXIN to the membrane; VEGFR2 mediated vascular permeability	30	34.26	0		8.81141e+07	5.57741e+07	7.95794e+07	7.44892e+07	1.36846e+07	5.12041e+07	6.07577e+07	4.12719e+07	5.10779e+07	7.95551e+06	5.70501e+06	7.16792e+06	1.25642	0.329324
n/a	High	Master Protein	Q14847-2	Isoform 2 of LIM and SH3 domain protein 1 [OS=Homo sapiens]		0	25	9	94	9	323	36	8.62	81.05	regulation of biological process;transport	cytoplasm;cytoskeleton	metal ion binding;protein binding;transporter activity	Pf00412, Pf00880	3927		LASP1	17				0	31.23	0		5.90081e+07	8.65312e+07	7.76791e+07	7.44061e+07	1.14721e+07	5.18323e+07	8.07951e+07	9.08469e+07	7.44914e+07	1.65396e+07	6.52437e+07	8.18863e+07	1.25508	0.327783
n/a	High	Master Protein	P41250	Glycine--tRNA ligase [OS=Homo sapiens]		0	8	7	47	7	739	83.1	7.03	20.54	metabolic process	cytoplasm;cytosol;extracellular;mitochondrion;organelle lumen	catalytic activity;nucleotide binding;protein binding	Pf00458, Pf00587, Pf03129	2617	ENSG00000106105.13	GARS	7		Aminoacyl-tRNA biosynthesis	Mitochondrial tRNA aminoacylation; Cytosolic tRNA aminoacylation	6	9.29	0.00127551		5.98182e+07	8.32371e+07	7.91086e+07	7.40546e+07	1.02068e+07	2.88596e+07	4.35584e+07	4.48365e+07	3.90848e+07	7.24915e+06	1.06796e+07	1.33812e+07	1.25297	0.325347
n/a	High	Master Protein	P04040	catalase [OS=Homo sapiens]		0	26	13	119	13	527	59.7	7.39	97.83	cell differentiation;cell organization and biogenesis;metabolic process;regulation of biological process;response to stimulus;transport	cytosol;endoplasmic reticulum;extracellular;Golgi;membrane;mitochondrion;organelle lumen;vacuole	antioxidant activity;catalytic activity;metal ion binding;nucleotide binding;protein binding	Pf00199, Pf06628	847	ENSG00000121691.4	CAT	11	Selenium Micronutrient Network; Folate Metabolism; Amyotrophic lateral sclerosis (ALS); Oxidative Stress; Tryptophan metabolism; DNA Damage Response (only ATM dependent)	Glyoxylate and dicarboxylate metabolism; Peroxisome; Longevity regulating pathway; FoxO signaling pathway; Longevity regulating pathway - multiple species; Tryptophan metabolism; Amyotrophic lateral sclerosis (ALS); Carbon metabolism	Neutrophil degranulation; Detoxification of Reactive Oxygen Species	20	42.84	0		6.53167e+07	7.43075e+07	8.20475e+07	7.38906e+07	6.83666e+06	7.06612e+07	1.27293e+08	2.76927e+08	1.58294e+08	8.70139e+07	6.42937e+07	8.05525e+07	1.25288	0.325253
n/a	High	Master Protein	Q00341-1	Vigilin [OS=Homo sapiens]		0	9	10	56	10	1268	141.4	6.87	46.8	metabolic process;transport	cytoplasm;cytosol;membrane;nucleus	protein binding;RNA binding	Pf00013, Pf13014, Pf14611	3069		HDLBP	2			HDL clearance	4	20.75	0		5.70174e+07	8.23614e+07	8.08771e+07	7.34186e+07	1.16133e+07	5.76667e+07	7.922e+07	8.17126e+07	7.28664e+07	1.07959e+07	7.20591e+06	9.00377e+06	1.2495	0.321349
n/a	High	Master Protein	P98082	Disabled homolog 2 [OS=Homo sapiens]		0.001	4	3	35	3	770	82.4	5.53	10.62	cell death;cell differentiation;cell organization and biogenesis;cell proliferation;development;regulation of biological process;response to stimulus;transport	cytoplasm;cytosol;membrane	protein binding;receptor activity	Pf00640	1601	ENSG00000153071.14	DAB2	5	Endoderm Differentiation; TGF-beta Signaling Pathway	Endocytosis	Cargo recognition for clathrin-mediated endocytosis; Formation of annular gap junctions	11	7.2	0.00107527		6.15825e+07	8.22669e+07	7.63304e+07	7.33933e+07	8.69603e+06	4.71189e+07	7.48025e+07	8.06028e+07	6.7508e+07	1.46105e+07	1.78491e+07	2.22814e+07	1.24832	0.319983
n/a	High	Master Protein	Q9NVI7-2	Isoform 2 of ATPase family AAA domain-containing protein 3A [OS=Homo sapiens]		0	10	7	70	7	586	66.2	9.25	61.81	cell growth;regulation of biological process	membrane;mitochondrion	catalytic activity;nucleotide binding;RNA binding	Pf00004, Pf00910, Pf01078, Pf05707, Pf06745, Pf07728, Pf12037, Pf13207, Pf13401	55210	ENSG00000197785.13	ATAD3A	1				0	17.65	0		5.61049e+07	8.61428e+07	7.75779e+07	7.32752e+07	1.26347e+07	5.40842e+07	7.98361e+07	8.48011e+07	7.29071e+07	1.34633e+07	5.33182e+07	6.6546e+07	1.24809	0.319723
		Master Protein	Q13936-23	Isoform 23 of Voltage-dependent L-type calcium channel subunit alpha-1C [OS=Homo sapiens]			1	3	21	3	2138	239.4	6.86		cell communication;cellular homeostasis;regulation of biological process;response to stimulus;transport	cytoplasm;membrane	metal ion binding;protein binding;transporter activity	Pf00520, Pf08016, Pf08763	775	ENSG00000151067.21	CACNA1C	12	Nicotine Activity on Chromaffin Cells; Alzheimers Disease; Arrhythmogenic Right Ventricular Cardiomyopathy; Calcium Regulation in the Cardiac Cell			4	4.85	0.000865801		5.90586e+07	8.39835e+07	7.66542e+07	7.32321e+07	1.04593e+07	5.15451e+07	8.29017e+07	8.35549e+07	7.26672e+07	1.4938e+07	1.03386e+06	1.28957e+06	1.24733	0.31884
n/a	High	Master Protein	P08069	Insulin-like growth factor 1 receptor [OS=Homo sapiens]		0	8	10	39	10	1367	154.7	5.8	24.83	cell organization and biogenesis;metabolic process;regulation of biological process;response to stimulus	membrane	catalytic activity;nucleotide binding;protein binding;receptor activity;signal transducer activity	Pf00041, Pf00069, Pf00757, Pf01030, Pf01826, Pf07714, Pf14843	3480	ENSG00000140443.13	IGF1R	15	MicroRNAs in cardiomyocyte hypertrophy; Human Thyroid Stimulating Hormone (TSH) signaling pathway; Signaling Pathways in Glioblastoma; Apoptosis; Focal Adhesion; Factors and pathways affecting insulin-like growth factor (IGF1)-Akt signaling; Focal Adhesion-PI3K-Akt-mTOR-signaling pathway; Endochondral Ossification; Insulin Signaling; Senescence and Autophagy in Cancer	Rap1 signaling pathway; Ras signaling pathway; Longevity regulating pathway - multiple species; Transcriptional misregulation in cancer; EGFR tyrosine kinase inhibitor resistance; Pathways in cancer; Longevity regulating pathway; Ovarian steroidogenesis; Long-term depression; AMPK signaling pathway; Glioma; Progesterone-mediated oocyte maturation; Endocrine resistance; Focal adhesion; FoxO signal…	IRS-related events triggered by IGF1R; SHC-related events triggered by IGF1R	42	14.3	0		6.85912e+07	7.38452e+07	7.7137e+07	7.31912e+07	3.51931e+06	3.62772e+07	4.9413e+07	5.45444e+07	4.67449e+07	7.6925e+06	2.74399e+06	3.41611e+06	1.24494	0.316075
n/a	High	Master Protein	Q9UBI6	guanine nucleotide-binding protein g(i)/g(s)/g(o) subunit gamma-12 [OS=Homo sapiens]		0.007	35	3	12	3	72	8	8.97	3.04	regulation of biological process;response to stimulus	membrane	protein binding;signal transducer activity	Pf00631	55970	ENSG00000172380.5	GNG12	1	Myometrial Relaxation and Contraction Pathways; G Protein Signaling Pathways; Chemokine signaling pathway; Focal Adhesion-PI3K-Akt-mTOR-signaling pathway; Regulation of Actin Cytoskeleton; Calcium Regulation in the Cardiac Cell	MAPK signaling pathway; Alcoholism; Pathways in cancer; Serotonergic synapse; Cholinergic synapse; Retrograde endocannabinoid signaling; Circadian entrainment; Ras signaling pathway; Glutamatergic synapse; GABAergic synapse; Dopaminergic synapse; Regulation of actin cytoskeleton; PI3K-Akt signaling pathway; Morphine addiction; Chemokine signaling pathway	G alpha (z) signalling events; Activation of G protein gated Potassium channels; Cooperation of PDCL (PhLP1) and TRiC/CCT in G-protein beta folding; Glucagon-type ligand receptors; Thromboxane signalling through TP receptor; ADP signalling through P2Y purinoceptor 1; G beta:gamma signalling through PI3Kgamma; Vasopressin regulates renal water homeostasis via Aquaporins; G-protein activation; Inhi…	76	5.44	0.000919118		7.92196e+07	4.62793e+07	9.3477e+07	7.2992e+07	1.97651e+07	5.62407e+07	8.42551e+07	8.90503e+07	7.65154e+07	1.44694e+07	3.24304e+08	4.02913e+08	1.24239	0.313122
		Master Protein	Q8TEC5	Putative E3 ubiquitin-protein ligase SH3RF2 [OS=Homo sapiens]			1	1	40	1	729	79.3	9.94		metabolic process;regulation of biological process		catalytic activity;enzyme regulator activity;metal ion binding;protein binding	Pf00018, Pf00097, Pf07653, Pf13445, Pf13639, Pf13920, Pf13923, Pf14570, Pf14604, Pf14634, Pf15227	153769	ENSG00000156463.17	SH3RF2	5				0	3.7	0.000782473		5.14382e+07	8.87704e+07	7.82615e+07	7.28234e+07	1.57184e+07	4.69325e+07	9.02488e+07	9.42779e+07	7.71531e+07	2.14324e+07	1.25398e+06	1.55731e+06	1.2419	0.312544
n/a	High	Master Protein	P13647	keratin, type II cytoskeletal 5 [OS=Homo sapiens]		0	57	45	375	27	590	62.3	7.74	396.38	cell death;cell organization and biogenesis;metabolic process	cytoplasm;cytosol;membrane;mitochondrion;nucleus	catalytic activity;motor activity;protein binding;structural molecule activity	Pf00038, Pf01576, Pf02994, Pf03961, Pf04111, Pf05957, Pf12128	3852	ENSG00000186081.11	KRT5	12			Formation of the cornified envelope; Type I hemidesmosome assembly	6	116.35	0		5.52891e+07	8.18968e+07	8.0895e+07	7.26936e+07	1.23137e+07	4.2545e+07	6.94227e+07	8.23453e+07	6.4771e+07	1.6578e+07	2.8548e+06	3.54429e+06	1.24152	0.312107
n/a	High	Master Protein	Q9NVA2-2	Isoform 2 of Septin-11 [OS=Homo sapiens]		0	18	7	47	7	439	50.8	7.01	18.34	cell division;cell organization and biogenesis	cytoplasm	nucleotide binding;protein binding	Pf00735	55752	ENSG00000138758.11	SEPT11	4				0	20.08	0		5.55464e+07	8.81412e+07	7.31143e+07	7.22673e+07	1.33203e+07	2.32699e+07	3.961e+07	4.63794e+07	3.64197e+07	9.70035e+06	6.29865e+09	7.81524e+09	1.24078	0.311247
n/a	High	Master Protein	P09496-1	clathrin light chain A [OS=Homo sapiens]		0.009	16	5	10	5	248	27.1	4.51	1.94	cell division;cell organization and biogenesis;cellular component movement;metabolic process;transport	cytoplasm;cytoskeleton;cytosol;membrane	protein binding;structural molecule activity	Pf01086	1211	ENSG00000122705.16	CLTA	9	Synaptic Vesicle Pathway	Endocrine and other factor-regulated calcium reabsorption; Endocytosis; Bacterial invasion of epithelial cells; Huntington's disease; Lysosome; Synaptic vesicle cycle	Cargo recognition for clathrin-mediated endocytosis; Formation of annular gap junctions; Golgi Associated Vesicle Biogenesis; Recycling pathway of L1; LDL clearance; Lysosome Vesicle Biogenesis; EPH-ephrin mediated repulsion of cells; Entry of Influenza Virion into Host Cell via Endocytosis; Retrograde neurotrophin signalling; VLDLR internalisation and degradation; WNT5A-dependent internalization…	48	3.87	0.000794281		5.62123e+07	8.25056e+07	7.77766e+07	7.21649e+07	1.14442e+07	5.49739e+07	9.64634e+07	1.07876e+08	8.64379e+07	2.2731e+07	2.61316e+07	3.23922e+07	1.23958	0.309849
n/a	High	Master Protein	Q9P258	Protein RCC2 [OS=Homo sapiens]		0	18	8	58	8	522	56	8.78	38.82	cell division;cell organization and biogenesis;regulation of biological process;response to stimulus	chromosome;cytoplasm;cytoskeleton;cytosol;membrane;nucleus	protein binding;RNA binding	Pf00415, Pf13540	55920	ENSG00000281540.2; ENSG00000179051.13	RCC2	1; CHR_HG2095_PATCH			Amplification of signal from unattached kinetochores via a MAD2 inhibitory signal; Separation of Sister Chromatids; Resolution of Sister Chromatid Cohesion; RHO GTPases Activate Formins	16	21.86	0		5.59494e+07	8.05205e+07	7.97623e+07	7.20774e+07	1.14084e+07	3.65251e+07	5.72673e+07	5.77473e+07	5.05132e+07	9.89306e+06	3.33383e+07	4.12033e+07	1.23592	0.30558
n/a	High	Master Protein	P35749-4	Isoform 4 of Myosin-11 [OS=Homo sapiens]		0	7	16	65	4	1938	223.4	5.53	110.5	cell organization and biogenesis;metabolic process;transport	cytosol;extracellular	catalytic activity;motor activity;nucleotide binding;protein binding;structural molecule activity	Pf00038, Pf00063, Pf01442, Pf01576, Pf02463, Pf02736, Pf04111, Pf04156, Pf05622, Pf07888, Pf09311, Pf09726, Pf09731, Pf10079, Pf12128, Pf12252, Pf12325, Pf13166	4629	ENSG00000133392.17; ENSG00000276480.5	MYH11	16; CHR_HSCHR16_1_CTG1				0	7.78	0.00111607		5.90497e+07	8.26171e+07	7.373e+07	7.17989e+07	9.71776e+06	2.87474e+07	4.12315e+07	4.36506e+07	3.78765e+07	6.53035e+06	1.27375e+07	1.57354e+07	1.23536	0.304929
n/a	High	Master Protein	P62140	Serine/threonine-protein phosphatase PP1-beta catalytic subunit [OS=Homo sapiens]		0	18	6	24	3	327	37.2	6.19	25.1	cell division;metabolic process;regulation of biological process;response to stimulus	cytoplasm;cytosol;nucleus	catalytic activity;metal ion binding;protein binding	Pf00149	5500	ENSG00000213639.9	PPP1CB	2	Common Pathways Underlying Drug Addiction; G13 Signaling Pathway	Focal adhesion; Oxytocin signaling pathway; cAMP signaling pathway; Amphetamine addiction; Herpes simplex infection; Dopaminergic synapse; Regulation of actin cytoskeleton; Adrenergic signaling in cardiomyocytes; Insulin resistance; Hippo signaling pathway; Inflammatory mediator regulation of TRP channels; Insulin signaling pathway; mRNA surveillance pathway; Platelet activation; Alcoholism; Oocy…	Triglyceride catabolism; RHO GTPases activate PAKs; RHO GTPases Activate ROCKs; Regulation of PLK1 Activity at G2/M Transition; Downregulation of TGF-beta receptor signaling; RHO GTPases activate CIT; RHO GTPases activate PKNs; Circadian Clock	43	2.36	0.00468227		5.47367e+07	8.12541e+07	7.82929e+07	7.14279e+07	1.18642e+07	4.32447e+07	7.19369e+07	8.51009e+07	6.67608e+07	1.74753e+07	5.29857e+06	6.53076e+06	1.23255	0.301648
n/a	High	Master Protein	P08865	40S ribosomal protein SA [OS=Homo sapiens]		0	44	9	95	9	295	32.8	4.87	119.17	cell organization and biogenesis;metabolic process;transport	cytoplasm;cytosol;membrane;nucleus;ribosome	protein binding;receptor activity;RNA binding;structural molecule activity	Pf00318	3921	ENSG00000168028.13	RPSA	3	Cytoplasmic Ribosomal Proteins	Ribosome	Peptide chain elongation; Eukaryotic Translation Termination; Viral mRNA Translation; Formation of the ternary complex, and subsequently, the 43S complex; L13a-mediated translational silencing of Ceruloplasmin expression; Selenocysteine synthesis; Nonsense Mediated Decay (NMD) independent of the Exon Junction Complex (EJC); Nonsense Mediated Decay (NMD) enhanced by the Exon Junction Complex (EJC)…	38	50.2	0	Acetyl [N-Term]	5.30542e+07	8.16227e+07	7.53552e+07	7.00107e+07	1.226e+07	3.00809e+07	5.70835e+07	5.96413e+07	4.89352e+07	1.33729e+07	956641	1.17869e+06	1.23211	0.301137
n/a	High	Master Protein	Q9NZM1	Myoferlin [OS=Homo sapiens]		0	10	18	70	16	2061	234.6	6.18	55.22	cell organization and biogenesis;regulation of biological process;response to stimulus	membrane;nucleus	protein binding	Pf00168, Pf08150, Pf08151, Pf08165	26509	ENSG00000138119.16	MYOF	10	Aryl Hydrocarbon Receptor Pathway; Hepatitis C and Hepatocellular Carcinoma			2	42.98	0		5.8412e+07	7.45955e+07	7.43185e+07	6.91087e+07	7.56452e+06	2.97518e+07	5.03032e+07	5.37539e+07	4.4603e+07	1.05954e+07	2.4923e+07	3.07023e+07	1.23189	0.300869
n/a	High	Master Protein	Q15459	splicing factor 3A subunit 1 [OS=Homo sapiens]		0	10	8	67	8	793	88.8	5.22	45.59	cell organization and biogenesis;metabolic process;regulation of biological process	nucleus;spliceosomal complex	protein binding;RNA binding	Pf00240, Pf01805, Pf12230, Pf14560	10291	ENSG00000099995.18	SF3A1	22	mRNA Processing	Spliceosome	mRNA Splicing - Major Pathway	6	19.89	0		5.69089e+07	7.80491e+07	7.22529e+07	6.90703e+07	8.91905e+06	5.65705e+07	8.46818e+07	8.69409e+07	7.60644e+07	1.38151e+07	1.68049e+07	2.0684e+07	1.23083	0.299636
n/a	High	Master Protein	Q9Y224	UPF0568 protein C14orf166 [OS=Homo sapiens]		0	53	11	71	11	244	28.1	6.65	20.59	metabolic process;regulation of biological process;transport	cytoplasm;cytoskeleton;cytosol;nucleus	protein binding;RNA binding	Pf10036	51637	ENSG00000087302.8	C14orf166; RTRAF	14			tRNA processing in the nucleus	3	12.76	0		6.08765e+07	7.14071e+07	7.36599e+07	6.86478e+07	5.57161e+06	4.56189e+07	6.35462e+07	5.90069e+07	5.60573e+07	7.61014e+06	1.00258e+06	1.23297e+06	1.22979	0.298417
n/a	High	Master Protein	P49327	Fatty acid synthase [OS=Homo sapiens]		0.003	2	5	25	5	2511	273.3	6.44	5.12	cell differentiation;metabolic process;regulation of biological process;response to stimulus	cytoplasm;cytosol;Golgi;membrane;mitochondrion	catalytic activity;nucleotide binding;protein binding;RNA binding	Pf00106, Pf00107, Pf00108, Pf00109, Pf00698, Pf00975, Pf02801, Pf08242, Pf08659, Pf13602, Pf14765	2194	ENSG00000169710.8	FASN	17	AMP-activated Protein Kinase (AMPK) Signaling; Sterol Regulatory Element-Binding Proteins (SREBP) signalling; SREBF and miR33 in cholesterol and lipid homeostasis; Liver X Receptor Pathway; Fatty Acid Biosynthesis; Angiopoietin Like Protein 8 Regulatory Pathway	Metabolic pathways; Fatty acid biosynthesis; Fatty acid metabolism; AMPK signaling pathway; Insulin signaling pathway	ChREBP activates metabolic gene expression; Fatty acyl-CoA biosynthesis; Vitamin B5 (pantothenate) metabolism; Activation of gene expression by SREBF (SREBP)	23	4.1	0.000814996		8.13831e+07	3.72682e+07	8.38006e+07	6.7484e+07	2.13885e+07	3.31103e+07	4.55398e+07	4.59419e+07	4.15307e+07	5.95638e+06	2.19638e+06	2.70065e+06	1.22959	0.298178
n/a	High	Master Protein	O75534	cold shock domain-containing protein E1 [OS=Homo sapiens]		0	16	11	58	11	798	88.8	6.25	34.76	metabolic process;regulation of biological process	cytoplasm;cytosol;Golgi;membrane	DNA binding;protein binding;RNA binding	Pf00313, Pf12901	7812	ENSG00000009307.15	CSDE1	1				0	17.48	0		6.79107e+07	6.60098e+07	6.75501e+07	6.71569e+07	824380	3.68885e+07	4.48598e+07	3.99706e+07	4.0573e+07	3.28202e+06	3.43762e+06	4.22537e+06	1.22915	0.297666
n/a	High	Master Protein	Q9H299	SH3 domain-binding glutamic acid-rich-like protein 3 [OS=Homo sapiens]		0.001	32	2	37	2	93	10.4	4.93	13.98	cellular homeostasis;metabolic process;regulation of biological process	cytoplasm;nucleus	catalytic activity	Pf00462, Pf04908	83442	ENSG00000142669.14	SH3BGRL3	1				0	7.99	0.00113766		5.72344e+07	8.08994e+07	6.2879e+07	6.70043e+07	1.0092e+07	5.48454e+07	7.66897e+07	8.61893e+07	7.25748e+07	1.31228e+07	3.03803e+06	3.73102e+06	1.22811	0.296434
n/a	High	Master Protein	Q9UJZ1	Stomatin-like protein 2, mitochondrial [OS=Homo sapiens]		0	14	4	56	4	356	38.5	7.39	66.12	cell organization and biogenesis;cellular homeostasis;metabolic process;regulation of biological process;response to stimulus;transport	cytoplasm;cytoskeleton;membrane;mitochondrion	protein binding	Pf01145	30968	ENSG00000165283.15	STOML2	9			Processing of SMDT1	3	24.43	0		5.1119e+07	7.43167e+07	7.50933e+07	6.6843e+07	1.11231e+07	4.00878e+07	6.93631e+07	7.99227e+07	6.31245e+07	1.68502e+07	2.22562e+08	2.73274e+08	1.22786	0.296142
n/a	High	Master Protein	Q04695	Keratin, type I cytoskeletal 17 [OS=Homo sapiens]		0	50	28	181	12	432	48.1	5.02	243.41	cell death;cell organization and biogenesis;regulation of biological process;response to stimulus	cytoplasm;cytoskeleton;cytosol	protein binding;receptor activity;signal transducer activity;structural molecule activity	Pf00038, Pf07888	3872	ENSG00000128422.15	KRT17	17			Formation of the cornified envelope	3	40.11	0		4.4464e+07	6.74305e+07	8.83202e+07	6.67382e+07	1.79109e+07	2.58115e+07	3.91727e+07	3.71728e+07	3.40524e+07	5.88409e+06	1.22102e+07	1.49865e+07	1.22738	0.295584
n/a	High	Master Protein	P25205-2	Isoform 2 of DNA replication licensing factor MCM3 [OS=Homo sapiens]		0	13	12	70	12	853	95.8	5.77	33.87	metabolic process	membrane;nucleus	catalytic activity;DNA binding;nucleotide binding;protein binding	Pf00493, Pf01078, Pf07728, Pf14551	4172	ENSG00000112118.18	MCM3	6	Cell Cycle; Retinoblastoma (RB) in Cancer; G1 to S cell cycle control; DNA Replication			4	22.27	0		6.27803e+07	5.85752e+07	7.86415e+07	6.66657e+07	8.64043e+06	4.85039e+07	6.81746e+07	6.43198e+07	6.03327e+07	8.51104e+06	5.38214e+06	6.60088e+06	1.22644	0.294478
n/a	High	Master Protein	O60841	Eukaryotic translation initiation factor 5B [OS=Homo sapiens]		0	5	6	27	6	1220	138.7	5.49	19.82	metabolic process;regulation of biological process	cytoplasm;cytosol;nucleus	catalytic activity;metal ion binding;nucleotide binding;protein binding;RNA binding	Pf00009, Pf01926, Pf03144, Pf11987, Pf14578	9669	ENSG00000158417.10	EIF5B	2	Translation Factors	RNA transport	GTP hydrolysis and joining of the 60S ribosomal subunit	7	8.06	0.00114155		5.52168e+07	8.06485e+07	6.39494e+07	6.66049e+07	1.05509e+07	2.16281e+07	2.9431e+07	3.19817e+07	2.76802e+07	4.40441e+06	705890	864803	1.22512	0.292928
n/a	High	Master Protein	P02768-1	Serum albumin [OS=Homo sapiens]		0	67	40	446	40	609	69.3	6.28	387.98	cell communication;cell organization and biogenesis;metabolic process;regulation of biological process;response to stimulus;transport	cytoplasm;endoplasmic reticulum;extracellular;Golgi;nucleus;organelle lumen	antioxidant activity;catalytic activity;DNA binding;metal ion binding;protein binding	Pf00273	213	ENSG00000163631.16	ALB	4	Selenium Micronutrient Network; Vitamin B12 Metabolism; Folate Metabolism	Thyroid hormone synthesis	Post-translational protein phosphorylation; Regulation of Insulin-like Growth Factor (IGF) transport and uptake by Insulin-like Growth Factor Binding Proteins (IGFBPs); Scavenging of heme from plasma; Platelet degranulation ; Defective SLCO1B1 causes hyperbilirubinemia, Rotor type (HBLRR); HDL remodeling; Defective SLCO1B3 causes hyperbilirubinemia, Rotor type (HBLRR); Transport of organic anions…	32	178.26	0		4.46027e+07	7.01848e+07	8.42265e+07	6.6338e+07	1.64035e+07	1.04224e+08	1.76034e+08	1.82732e+08	1.5433e+08	3.55356e+07	2.43421e+06	2.97888e+06	1.22376	0.291317
n/a	High	Master Protein	Q08211	Atp-dependent rna helicase a [OS=Homo sapiens]		0	11	10	33	10	1270	140.9	6.84	23.39	cell death;cell differentiation;cell organization and biogenesis;defense response;metabolic process;regulation of biological process;response to stimulus;transport	cytoplasm;cytoskeleton;cytosol;membrane;nucleus;ribosome	catalytic activity;DNA binding;metal ion binding;nucleotide binding;protein binding;RNA binding	Pf00035, Pf00270, Pf00271, Pf04408, Pf07717	1660	ENSG00000135829.16	DHX9	1	mRNA Processing		TRAF6 mediated NF-kB activation; TAK1 activates NFkB by phosphorylation and activation of IKKs complex; RIP-mediated NFkB activation via ZBP1; Activated TLR4 signalling; Interleukin-1 family signaling; mRNA Splicing - Major Pathway; DEx/H-box helicases activate type I IFN and inflammatory cytokines production	34	34.74	0		7.17468e+07	6.78575e+07	5.91905e+07	6.62649e+07	5.24832e+06	4.68022e+07	6.73297e+07	6.67246e+07	6.02855e+07	9.53731e+06	6.27939e+08	7.67799e+08	1.22273	0.290105
n/a	High	Master Protein	O60884	DnaJ homolog subfamily A member 2 [OS=Homo sapiens]		0	17	7	49	7	412	45.7	6.48	40.63	metabolic process;regulation of biological process;response to stimulus	cytosol;membrane	enzyme regulator activity;metal ion binding;nucleotide binding;protein binding	Pf00226, Pf00684, Pf01556	10294	ENSG00000069345.11	DNAJA2	16		Protein processing in endoplasmic reticulum	HSP90 chaperone cycle for steroid hormone receptors (SHR)	4	16.67	0		6.52329e+07	5.84458e+07	7.50808e+07	6.62531e+07	6.82942e+06	5.81089e+07	8.35295e+07	5.85068e+07	6.67151e+07	1.18907e+07	2.3967e+06	2.92848e+06	1.22188	0.2891
n/a	High	Master Protein	Q15029	116 kDa U5 small nuclear ribonucleoprotein component [OS=Homo sapiens]		0	15	13	82	12	972	109.4	5	40.86	cell organization and biogenesis;metabolic process;response to stimulus	cytosol;membrane;nucleus;spliceosomal complex	catalytic activity;nucleotide binding;protein binding;RNA binding	Pf00009, Pf00679, Pf03144, Pf03764, Pf14492	9343	ENSG00000108883.12	EFTUD2	17	mRNA Processing	Spliceosome	mRNA Splicing - Major Pathway; mRNA Splicing - Minor Pathway	7	29.7	0		5.45921e+07	6.96228e+07	7.416e+07	6.6125e+07	8.36267e+06	5.23415e+07	7.63851e+07	7.70348e+07	6.85872e+07	1.14904e+07	1.017e+06	1.24031e+06	1.21958	0.286382
n/a	High	Master Protein	P28838	cytosol aminopeptidase [OS=Homo sapiens]		0	6	3	23	3	519	56.1	7.93	19.86	metabolic process	cytoplasm;cytosol;mitochondrion;nucleus	catalytic activity;metal ion binding	Pf00883, Pf02789	51056	ENSG00000002549.12	LAP3	4		Arginine and proline metabolism; Glutathione metabolism; Metabolic pathways		3	9.76	0.00131406		6.28711e+07	6.52142e+07	6.96114e+07	6.58989e+07	2.794e+06	4.01397e+07	5.04772e+07	5.69318e+07	4.91829e+07	6.91614e+06	476439	580847	1.21914	0.285866
n/a	High	Master Protein	P40926	Malate dehydrogenase, mitochondrial [OS=Homo sapiens]		0	42	12	67	12	338	35.5	8.68	50.1	metabolic process	membrane;mitochondrion;nucleus;organelle lumen	catalytic activity;nucleotide binding;protein binding;RNA binding	Pf00056, Pf01073, Pf01118, Pf02866, Pf13460	4191	ENSG00000146701.11	MDH2	7	Amino Acid metabolism; Glycolysis and Gluconeogenesis; TCA Cycle	Glyoxylate and dicarboxylate metabolism; Pyruvate metabolism; Cysteine and methionine metabolism; Carbon metabolism; Metabolic pathways; Citrate cycle (TCA cycle)	Gluconeogenesis; Citric acid cycle (TCA cycle)	16	49.93	0		5.68715e+07	7.70006e+07	6.23828e+07	6.54183e+07	8.49336e+06	3.40996e+07	5.39434e+07	5.53545e+07	4.77992e+07	9.70419e+06	1.1562e+07	1.40927e+07	1.21888	0.285558
n/a	High	Master Protein	O60716-17	Isoform 3ABC of Catenin delta-1 [OS=Homo sapiens]		0	16	14	51	14	867	96.6	6.24	36.5	cell organization and biogenesis;metabolic process;regulation of biological process;response to stimulus	cytoplasm;cytosol;membrane;nucleus	protein binding	Pf00514	1500	ENSG00000198561.13	CTNND1	11	VEGFA-VEGFR2 Signaling Pathway; Wnt Signaling Pathway and Pluripotency			2	17.25	0		5.40696e+07	6.53612e+07	7.63003e+07	6.52437e+07	9.07602e+06	5.42478e+07	9.29566e+07	9.84545e+07	8.18863e+07	1.96718e+07	1.26933e+07	1.54707e+07	1.21881	0.285471
n/a	High	Master Protein	P63244	Receptor of activated protein C kinase 1 [OS=Homo sapiens]		0	61	14	145	14	317	35.1	7.69	171.65	cell death;cellular homeostasis;development;metabolic process;regulation of biological process;response to stimulus	cytoplasm;cytosol;membrane;mitochondrion;nucleus;ribosome	enzyme regulator activity;protein binding;RNA binding;structural molecule activity	Pf00400	10399	ENSG00000204628.11	GNB2L1; RACK1	5	Androgen receptor signaling pathway; Brain-Derived Neurotrophic Factor (BDNF) signaling pathway; VEGFA-VEGFR2 Signaling Pathway; Interferon type I signaling pathways	Measles	Regulation of TNFR1 signaling; TNFR1-mediated ceramide production; TNFR1-induced NFkappaB signaling pathway	11	94.81	0		4.9161e+07	7.27075e+07	7.37395e+07	6.52026e+07	1.1351e+07	4.62225e+07	7.58379e+07	7.65947e+07	6.62183e+07	1.41426e+07	7.95447e+07	9.68981e+07	1.21816	0.284704
n/a	High	Master Protein	Q9NW15-1	Anoctamin-10 [OS=Homo sapiens]		0.009	2	2	4	1	660	76.3	7.4	2.06	transport	membrane	transporter activity	Pf04547	55129	ENSG00000160746.12	ANO10	3			Stimuli-sensing channels	3		0		5.0324e+07	7.7243e+07	6.78334e+07	6.51335e+07	1.11542e+07	5.25021e+07	8.75152e+07	8.65476e+07	7.55216e+07	1.6282e+07	1.08613e+07	1.32253e+07	1.21765	0.284096
n/a	High	Master Protein	P04259	keratin, type II cytoskeletal 6B [OS=Homo sapiens]		0	55	41	243	4	564	60	8	372.99	cell death;cell organization and biogenesis;metabolic process	cytosol	catalytic activity;motor activity;protein binding;structural molecule activity	Pf00038, Pf01576, Pf04111, Pf13166	3854	ENSG00000185479.5	KRT6B	12			Formation of the cornified envelope	3	16.62	0		4.91141e+07	7.40826e+07	7.21652e+07	6.51206e+07	1.13454e+07	4.78591e+07	7.95468e+07	8.56157e+07	7.10072e+07	1.65546e+07	2.23305e+07	2.71781e+07	1.21708	0.283429
n/a	High	Master Protein	P33991	DNA replication licensing factor MCM4 [OS=Homo sapiens]		0	9	8	56	8	863	96.5	6.74	49.74	metabolic process	membrane;nucleus	catalytic activity;DNA binding;nucleotide binding;protein binding	Pf00493, Pf07728, Pf14551	4173	ENSG00000104738.16	MCM4	8	Cell Cycle; Gastric Cancer Network 1; Retinoblastoma (RB) in Cancer; G1 to S cell cycle control; DNA Replication	DNA replication; Cell cycle	M/G1 Transition; Assembly of the pre-replicative complex; Unwinding of DNA; Regulation of DNA replication; Activation of ATR in response to replication stress; Activation of the pre-replicative complex; Orc1 removal from chromatin; Removal of licensing factors from origins	27	21.79	0		6.37418e+07	5.6908e+07	7.35769e+07	6.47422e+07	6.84171e+06	5.45189e+07	8.74871e+07	8.9206e+07	7.70706e+07	1.5962e+07	1.5732e+08	1.91445e+08	1.21691	0.283228
n/a	High	Master Protein	Q86V81	THO complex subunit 4 [OS=Homo sapiens]		0	17	4	24	4	257	26.9	11.15	22.66	cell differentiation;metabolic process;regulation of biological process;response to stimulus;transport	cytoplasm;cytosol;membrane;nucleus;spliceosomal complex	protein binding;RNA binding	Pf00076, Pf13893, Pf14259	10189		ALYREF	17		Spliceosome; mRNA surveillance pathway; RNA transport; Herpes simplex infection	mRNA 3'-end processing; Transport of Mature mRNA Derived from an Intronless Transcript; mRNA Splicing - Major Pathway; Transport of the SLBP Dependant Mature mRNA; Cleavage of Growing Transcript in the Termination Region ; Transport of Mature mRNA derived from an Intron-Containing Transcript; Transport of the SLBP independent Mature mRNA	19	11.06	0.00144509		8.20387e+07	3.24748e+07	7.87963e+07	6.44366e+07	2.26391e+07	4.86535e+07	6.98174e+07	6.62946e+07	6.15885e+07	9.2588e+06	2.39843e+06	2.91562e+06	1.21564	0.28171
n/a	High	Master Protein	P15311	Ezrin [OS=Homo sapiens]		0	18	11	61	6	586	69.4	6.27	45.09	cell differentiation;cell organization and biogenesis;cellular component movement;metabolic process;regulation of biological process;response to stimulus;transport	cytoplasm;cytoskeleton;cytosol;endosome;membrane	protein binding;RNA binding	Pf00373, Pf00769, Pf09379, Pf09380	7430	ENSG00000092820.17	EZR	6	Pathogenic Escherichia coli infection; AGE/RAGE pathway; VEGFA-VEGFR2 Signaling Pathway; Regulation of Actin Cytoskeleton	Proteoglycans in cancer; Leukocyte transendothelial migration; Pathogenic Escherichia coli infection; Gastric acid secretion; Regulation of actin cytoskeleton; MicroRNAs in cancer	Netrin-1 signaling; Recycling pathway of L1	15	14.23	0		6.37286e+07	6.76179e+07	6.15345e+07	6.42937e+07	2.51548e+06	7.06677e+07	9.25258e+07	7.84641e+07	8.05525e+07	9.04487e+06	4.23244e+07	5.13984e+07	1.21439	0.280232
n/a	High	Master Protein	P60866	40S ribosomal protein S20 [OS=Homo sapiens]		0	24	3	43	3	119	13.4	9.94	22.87	cell organization and biogenesis;metabolic process;transport	cytoplasm;cytosol;membrane;ribosome	protein binding;RNA binding;structural molecule activity	Pf00338	6224	ENSG00000008988.9	RPS20	8	Cytoplasmic Ribosomal Proteins	Ribosome	Peptide chain elongation; Eukaryotic Translation Termination; Viral mRNA Translation; Formation of the ternary complex, and subsequently, the 43S complex; L13a-mediated translational silencing of Ceruloplasmin expression; Selenocysteine synthesis; Nonsense Mediated Decay (NMD) independent of the Exon Junction Complex (EJC); Nonsense Mediated Decay (NMD) enhanced by the Exon Junction Complex (EJC)…	38	12.99	0		4.57078e+07	6.91789e+07	7.60727e+07	6.36531e+07	1.29976e+07	3.64096e+07	6.3746e+07	6.86933e+07	5.6283e+07	1.4197e+07	2.09951e+06	2.5488e+06	1.214	0.279766
n/a	High	Master Protein	Q9BSJ8	Extended synaptotagmin-1 [OS=Homo sapiens]		0.001	8	8	45	8	1104	122.8	5.83	14.56	metabolic process;transport	endoplasmic reticulum;membrane	metal ion binding;protein binding	Pf00168	23344	ENSG00000139641.12	ESYT1	12			Glycosphingolipid metabolism	4	11.13	0.00145349		4.98705e+07	7.15608e+07	6.75509e+07	6.29941e+07	9.42305e+06	2.64067e+07	4.08344e+07	4.32481e+07	3.68298e+07	7.43578e+06	1.42258e+06	1.7267e+06	1.21378	0.279511
n/a	High	Master Protein	P05204	Non-histone chromosomal protein HMG-17 [OS=Homo sapiens]		0.007	17	3	37	3	90	9.4	9.99	3.54		chromosome;cytoplasm;nucleus	DNA binding;protein binding;RNA binding		3151	ENSG00000198830.10	HMGN2	1				0	19	0		6.66616e+07	5.78278e+07	6.4007e+07	6.28321e+07	3.7008e+06	9.5028e+07	1.16937e+08	1.00361e+08	1.04109e+08	9.32867e+06	2.20493e+06	2.67624e+06	1.21375	0.27947
n/a	High	Master Protein	P15924-1	Desmoplakin [OS=Homo sapiens]		0	27	88	349	88	2871	331.6	6.81	236.5	cell death;cell differentiation;cell organization and biogenesis;metabolic process;regulation of biological process;response to stimulus;transport	cytoplasm;cytoskeleton;membrane;nucleus	catalytic activity;motor activity;protein binding;RNA binding;structural molecule activity	Pf00038, Pf00681, Pf01540, Pf01576, Pf02463, Pf04111, Pf04156, Pf05483, Pf05557, Pf05622, Pf06008, Pf06160, Pf06637, Pf07888, Pf10174, Pf12072, Pf12128, Pf13166	1832	ENSG00000096696.13	DSP	6	Arrhythmogenic Right Ventricular Cardiomyopathy; Lung fibrosis	Arrhythmogenic right ventricular cardiomyopathy (ARVC)	Apoptotic cleavage of cell adhesion proteins; Formation of the cornified envelope; Neutrophil degranulation	14	151.31	0		5.18078e+07	6.94727e+07	6.62627e+07	6.25144e+07	7.68332e+06	4.24069e+07	5.76758e+07	6.23318e+07	5.41381e+07	8.51027e+06	2.03965e+06	2.47551e+06	1.21369	0.279401
n/a	High	Master Protein	Q8NE86	Calcium uniporter protein, mitochondrial [OS=Homo sapiens]		0	17	6	64	6	351	39.8	8.65	29.26	cell organization and biogenesis;cellular homeostasis;defense response;metabolic process;regulation of biological process;response to stimulus;transport	membrane;mitochondrion	catalytic activity;protein binding;transporter activity	Pf04678	90550	ENSG00000156026.14	MCU	10		NOD-like receptor signaling pathway; Calcium signaling pathway	Processing of SMDT1	5	18.83	0		5.39377e+07	6.53589e+07	6.72082e+07	6.21683e+07	5.86865e+06	4.90308e+07	7.94474e+07	7.08894e+07	6.64559e+07	1.28072e+07	4.71088e+06	5.71611e+06	1.21339	0.279038
n/a	High	Master Protein	P11498	pyruvate carboxylase, mitochondrial [OS=Homo sapiens]		0	17	19	118	19	1178	129.6	6.84	102.85	metabolic process;regulation of biological process	cytoplasm;cytosol;mitochondrion;organelle lumen	catalytic activity;metal ion binding;nucleotide binding;protein binding	Pf00289, Pf00364, Pf00682, Pf02222, Pf02436, Pf02785, Pf02786, Pf07478, Pf08443, Pf13533, Pf13535, Pf15632	5091	ENSG00000173599.13	PC	11	Alanine and aspartate metabolism; TCA Cycle and Deficiency of Pyruvate Dehydrogenase complex (PDHc); Fatty Acid Biosynthesis; Amino Acid metabolism; Glycolysis and Gluconeogenesis	Carbon metabolism; Biosynthesis of amino acids; Citrate cycle (TCA cycle); Metabolic pathways; Pyruvate metabolism	Gluconeogenesis; Biotin transport and metabolism; Defective HLCS causes multiple carboxylase deficiency	22	51.35	0		6.01095e+07	5.89398e+07	6.6829e+07	6.19594e+07	3.47628e+06	4.83708e+07	7.87044e+07	8.45398e+07	7.05383e+07	1.58548e+07	824087	999012	1.21227	0.277706
n/a	High	Master Protein	P55084	Trifunctional enzyme subunit beta, mitochondrial [OS=Homo sapiens]		0	9	4	42	4	474	51.3	9.41	26.41	metabolic process	endoplasmic reticulum;membrane;mitochondrion	catalytic activity;protein binding;RNA binding	Pf00108, Pf00109, Pf02803	3032	ENSG00000138029.13	HADHB	2	Fatty Acid Beta Oxidation; Valproic acid pathway; Sudden Infant Death Syndrome (SIDS) Susceptibility Pathways	Fatty acid degradation; Valine, leucine and isoleucine degradation; Fatty acid elongation; Fatty acid metabolism; Metabolic pathways	Beta oxidation of hexanoyl-CoA to butanoyl-CoA; Beta oxidation of lauroyl-CoA to decanoyl-CoA-CoA; Beta oxidation of palmitoyl-CoA to myristoyl-CoA; Beta oxidation of myristoyl-CoA to lauroyl-CoA; Acyl chain remodeling of CL; Beta oxidation of decanoyl-CoA to octanoyl-CoA-CoA; mitochondrial fatty acid beta-oxidation of unsaturated fatty acids; Beta oxidation of octanoyl-CoA to hexanoyl-CoA	23	10.48	0.0013947		4.62759e+07	7.33415e+07	6.62198e+07	6.19458e+07	1.14554e+07	3.62377e+07	7.60392e+07	6.42539e+07	5.88436e+07	1.66932e+07	1.40339e+06	1.7005e+06	1.21171	0.277047
n/a	High	Master Protein	P38606	V-type proton ATPase catalytic subunit A [OS=Homo sapiens]		0	19	10	46	10	617	68.3	5.52	18.5	cellular homeostasis;metabolic process;regulation of biological process;response to stimulus;transport	cytosol;membrane;mitochondrion	catalytic activity;nucleotide binding;transporter activity	Pf00006, Pf00306, Pf02874	523	ENSG00000114573.9	ATP6V1A	3		mTOR signaling pathway; Rheumatoid arthritis; Vibrio cholerae infection; Collecting duct acid secretion; Metabolic pathways; Oxidative phosphorylation; Phagosome; Synaptic vesicle cycle; Epithelial cell signaling in Helicobacter pylori infection	Transferrin endocytosis and recycling; ROS, RNS production in phagocytes; Ion channel transport; Insulin receptor recycling	20	12.4	0		4.78672e+07	6.9199e+07	6.86694e+07	6.19119e+07	9.93341e+06	2.0092e+07	3.43786e+07	3.5131e+07	2.98672e+07	6.91893e+06	1.67737e+08	2.03239e+08	1.21165	0.276976
n/a	High	Master Protein	O75822	Eukaryotic translation initiation factor 3 subunit J [OS=Homo sapiens]		0	19	5	38	5	258	29	4.83	31.58	cell organization and biogenesis;metabolic process;regulation of biological process	cytoplasm;cytosol	protein binding;RNA binding	Pf08597	8669	ENSG00000104131.12	EIF3J	15	Translation Factors	RNA transport	Formation of the ternary complex, and subsequently, the 43S complex; L13a-mediated translational silencing of Ceruloplasmin expression; Translation initiation complex formation; GTP hydrolysis and joining of the 60S ribosomal subunit; Formation of a pool of free 40S subunits; Ribosomal scanning and start codon recognition	13	17.04	0		5.00578e+07	7.05958e+07	6.46552e+07	6.17696e+07	8.62933e+06	4.63291e+07	7.45436e+07	8.40608e+07	6.83112e+07	1.60219e+07	5.33308e+06	6.46074e+06	1.21145	0.276731
n/a	High	Master Protein	O43852-4	Isoform 4 of Calumenin [OS=Homo sapiens]		0	35	11	93	4	323	38.1	4.58	73.17	metabolic process	endoplasmic reticulum;extracellular;Golgi;membrane;organelle lumen	metal ion binding;protein binding	Pf13499	813	ENSG00000128595.16	CALU	7	NOTCH1 regulation of human endothelial cell calcification			1	33.37	0		6.18194e+07	5.78262e+07	6.47034e+07	6.14497e+07	2.81977e+06	8.72839e+07	1.04305e+08	1.16942e+08	1.02844e+08	1.2152e+07	7.66757e+07	9.28853e+07	1.2114	0.276681
n/a	High	Master Protein	Q16531	DNA damage-binding protein 1 [OS=Homo sapiens]		0	7	8	29	8	1140	126.9	5.26	23.63	cell organization and biogenesis;metabolic process;regulation of biological process;response to stimulus	cytoplasm;nucleus	DNA binding;protein binding	Pf03178, Pf10433	1642	ENSG00000167986.13	DDB1	11		Nucleotide excision repair; Hepatitis B; Ubiquitin mediated proteolysis; Viral carcinogenesis	Formation of Incision Complex in GG-NER; DNA Damage Recognition in GG-NER; Gap-filling DNA repair synthesis and ligation in TC-NER; Recognition of DNA damage by PCNA-containing replication complex; Dual incision in TC-NER; Formation of TC-NER Pre-Incision Complex; Dual Incision in GG-NER; Neddylation	19	12.42	0		5.54779e+07	6.55558e+07	6.33123e+07	6.14486e+07	4.32018e+06	5.08517e+07	7.44677e+07	7.81559e+07	6.78251e+07	1.20961e+07	570103	690521	1.21122	0.276464
n/a	High	Master Protein	Q01105	Protein SET [OS=Homo sapiens]		0.007	46	8	43	8	290	33.5	4.32	4.01	cell organization and biogenesis;metabolic process;regulation of biological process;transport	cytoplasm;cytosol;endoplasmic reticulum;nucleus	DNA binding;enzyme regulator activity;protein binding	Pf00956	6418	ENSG00000119335.16	SET	9	Histone Modifications		HuR (ELAVL1) binds and stabilizes mRNA; Condensation of Prophase Chromosomes	9	16.59	0		7.48752e+07	3.99153e+07	6.85597e+07	6.11168e+07	1.52118e+07	6.65091e+07	7.98315e+07	6.90396e+07	7.17934e+07	5.7769e+06	5.8336e+06	7.05722e+06	1.20975	0.274714
n/a	High	Master Protein	P58107	epiplakin [OS=Homo sapiens]		0	5	6	64	3	5090	555.3	5.6	44.73	cell organization and biogenesis;regulation of biological process;response to stimulus	cytoplasm;cytoskeleton;membrane	protein binding;RNA binding	Pf00681	83481		EPPK1	8				0	4.16	0.000822368		4.79281e+07	6.54271e+07	6.99657e+07	6.11069e+07	9.50127e+06	4.38439e+07	7.38312e+07	8.40227e+07	6.72326e+07	1.70536e+07	3.09598e+06	3.74356e+06	1.20917	0.274013
n/a	High	Master Protein	P60891	ribose-phosphate pyrophosphokinase 1 [OS=Homo sapiens]		0	14	4	34	4	318	34.8	6.98	19.34	metabolic process	cytosol	catalytic activity;metal ion binding;nucleotide binding;protein binding	Pf00156, Pf13793, Pf14572	5631	ENSG00000147224.10	PRPS1	X	Nucleotide Metabolism	Purine metabolism; Metabolic pathways; Pentose phosphate pathway; Carbon metabolism; Biosynthesis of amino acids	5-Phosphoribose 1-diphosphate biosynthesis	10	7.39	0.00109051		4.65833e+07	7.54952e+07	5.97115e+07	6.05967e+07	1.18198e+07	2.58975e+07	3.93839e+07	3.9503e+07	3.49281e+07	6.38579e+06	1.662e+06	2.00921e+06	1.20891	0.273709
n/a	High	Master Protein	Q07666	KH domain-containing, RNA-binding, signal transduction-associated protein 1 [OS=Homo sapiens]		0.001	8	4	34	4	443	48.2	8.66	12.25	cell organization and biogenesis;cell proliferation;metabolic process;regulation of biological process;response to stimulus	cytoplasm;cytosol;membrane;nucleus	DNA binding;protein binding;RNA binding	Pf00013, Pf13014	10657	ENSG00000121774.17	KHDRBS1	1	Leptin signaling pathway		PTK6 Regulates Proteins Involved in RNA Processing	5	11.13	0.0014556		3.94963e+07	9.05173e+07	5.15581e+07	6.05239e+07	2.17727e+07	2.99835e+07	4.8459e+07	4.9395e+07	4.26125e+07	8.9382e+06	1.98957e+06	2.39862e+06	1.2056	0.269751
n/a	High	Master Protein	Q9BWM7	Sideroflexin-3 [OS=Homo sapiens]		0	11	4	36	4	321	35.5	9.1	18.47	transport	membrane;mitochondrion	transporter activity	Pf03820	81855	ENSG00000107819.13	SFXN3	10				0	13.63	0		4.53304e+07	6.96846e+07	6.48682e+07	5.99611e+07	1.05306e+07	3.57672e+07	6.32343e+07	7.46426e+07	5.78814e+07	1.63159e+07	5.31905e+07	6.41014e+07	1.20513	0.269188
n/a	High	Master Protein	P29317	Ephrin type-A receptor 2 [OS=Homo sapiens]		0	9	9	55	9	976	108.2	6.23	33.05	cell death;cell differentiation;cell organization and biogenesis;cell proliferation;cellular component movement;defense response;development;metabolic process;regulation of biological process;response to stimulus	cell surface;membrane	catalytic activity;nucleotide binding;protein binding;receptor activity;signal transducer activity	Pf00041, Pf00069, Pf00536, Pf01404, Pf07647, Pf07699, Pf07714, Pf09294, Pf14575	1969	ENSG00000142627.12	EPHA2	1	NRF2 pathway; Focal Adhesion-PI3K-Akt-mTOR-signaling pathway	PI3K-Akt signaling pathway; Rap1 signaling pathway; Axon guidance; Ras signaling pathway	EPH-ephrin mediated repulsion of cells; EPHA-mediated growth cone collapse	11	29.95	0		4.2778e+07	7.3397e+07	6.34759e+07	5.98836e+07	1.27556e+07	2.45429e+07	3.54686e+07	4.28188e+07	3.42768e+07	7.50855e+06	3.22834e+06	3.88657e+06	1.20389	0.267705
n/a	High	Master Protein	P13796	Plastin-2 [OS=Homo sapiens]		0	45	26	167	22	627	70.2	5.43	177.37	cell organization and biogenesis;cellular component movement;regulation of biological process;response to stimulus	cytoplasm;cytoskeleton;cytosol;membrane	metal ion binding;protein binding	Pf00036, Pf00307, Pf13405, Pf13499	3936	ENSG00000136167.13	LCP1	13			Gene and protein expression by JAK-STAT signaling after Interleukin-12 stimulation; Interleukin-12 family signaling	5	112.03	0		4.6265e+07	6.51774e+07	6.82018e+07	5.98814e+07	9.7071e+06	4.86837e+07	5.48997e+07	5.64563e+07	5.33466e+07	3.35782e+06	1.06853e+06	1.286e+06	1.20352	0.267265
n/a	High	Master Protein	P52272-2	Isoform 2 of Heterogeneous nuclear ribonucleoprotein M [OS=Homo sapiens]		0	19	9	45	9	691	73.6	8.82	24.14	metabolic process;regulation of biological process;response to stimulus	membrane;spliceosomal complex	protein binding;RNA binding	Pf00076, Pf11532, Pf11608, Pf13893, Pf14259	4670	ENSG00000099783.11	HNRNPM	19	mRNA Processing			1	14.47	0		4.46464e+07	7.38035e+07	6.1049e+07	5.98329e+07	1.19344e+07	4.74821e+07	8.39132e+07	8.2142e+07	7.11791e+07	1.67719e+07	9.91375e+06	1.19267e+07	1.20305	0.266698
n/a	High	Master Protein	P49207	60S ribosomal protein L34 [OS=Homo sapiens]		0	16	3	24	3	117	13.3	11.47	27.42	cell organization and biogenesis;metabolic process;transport	cytosol;mitochondrion;ribosome	protein binding;RNA binding;structural molecule activity	Pf01199	6164	ENSG00000109475.16	RPL34	4	Cytoplasmic Ribosomal Proteins	Ribosome	Peptide chain elongation; Eukaryotic Translation Termination; Viral mRNA Translation; L13a-mediated translational silencing of Ceruloplasmin expression; Nonsense Mediated Decay (NMD) independent of the Exon Junction Complex (EJC); Selenocysteine synthesis; Nonsense Mediated Decay (NMD) enhanced by the Exon Junction Complex (EJC); GTP hydrolysis and joining of the 60S ribosomal subunit; Major path…	34	5.88	0.000952381		6.65364e+07	5.43262e+07	5.81708e+07	5.96778e+07	5.0974e+06	5.56489e+07	6.99351e+07	4.67043e+07	5.74294e+07	9.56715e+06	1.40359e+07	1.68821e+07	1.20278	0.266373
n/a	High	Master Protein	Q27J81-2	Isoform 2 of Inverted formin-2 [OS=Homo sapiens]		0.001	6	9	41	8	1240	134.5	5.53	16.35	cell organization and biogenesis;regulation of biological process		protein binding	Pf02181, Pf06367, Pf06371	64423	ENSG00000203485.12	INF2	14	Primary Focal Segmental Glomerulosclerosis FSGS			1	17.13	0		6.10734e+07	5.02928e+07	6.59369e+07	5.91011e+07	6.53718e+06	8.26262e+07	1.04589e+08	1.00478e+08	9.5898e+07	9.53346e+06	3.86927e+07	4.64007e+07	1.19921	0.262086
n/a	High	Master Protein	P62191	26S proteasome regulatory subunit 4 [OS=Homo sapiens]		0	14	6	29	6	440	49.2	6.21	18.05	metabolic process;regulation of biological process;response to stimulus;transport	cytoplasm;cytosol;membrane;nucleus;proteasome	catalytic activity;nucleotide binding;protein binding;RNA binding	Pf00004, Pf00910, Pf01078, Pf05496, Pf05673, Pf05729, Pf07724, Pf07726, Pf07728, Pf13191, Pf13401	5700	ENSG00000100764.13	PSMC1	14	Proteasome Degradation; Parkin-Ubiquitin Proteasomal System pathway	Viral carcinogenesis; Proteasome; Epstein-Barr virus infection	Regulation of RAS by GAPs; CDT1 association with the CDC6:ORC:origin complex; Downstream TCR signaling; UCH proteinases; NIK-->noncanonical NF-kB signaling; Hh mutants that don't undergo autocatalytic processing are degraded by ERAD; SCF-beta-TrCP mediated degradation of Emi1; Cross-presentation of soluble exogenous antigens (endosomes); Separation of Sister Chromatids; Vpu mediated degradation o…	155	14.21	0		5.31812e+07	5.78572e+07	6.56574e+07	5.88986e+07	5.14631e+06	4.01624e+07	6.74623e+07	5.83884e+07	5.53377e+07	1.1352e+07	1.7561e+08	2.10466e+08	1.19848	0.261206
[truncated: 1,509 more rows]

## Sheet: Upregulated in Low attachment
Protein FDR Confidence: A5 PMI-Byonic	Protein FDR Confidence: Sequest HT	Master	Accession	Description	Exp. q-value: A5 PMI-Byonic	Exp. q-value: Sequest HT	Coverage [%]	# Peptides	# PSMs	# Unique Peptides	# AAs	MW [kDa]	calc. pI	Score Sequest HT: Sequest HT	Biological Process	Cellular Component	Molecular Function	Pfam IDs	Entrez Gene ID	Ensembl Gene ID	Gene Symbol	Chromosome	WikiPathways	KEGG Pathways	Reactome Pathways	# Protein Pathway Groups	|Log Prob| (by Search Engine): PMI-Byonic A5	FDR (by Search Engine): PMI-Byonic A5	Modifications	Abundances (Normalized): F1: Sample, CM61-adherent, A1	Abundances (Normalized): F2: Sample, CM61-adherent, A2	Abundances (Normalized): F3: Sample, CM61-adherent, A3	Avg CM61-adherent	SD	Abundances (Normalized): F7: Sample, CM61-low-attachment, C1	Abundances (Normalized): F8: Sample, CM61-low-attachment, C2	Abundances (Normalized): F9: Sample, CM61-low-attachment, C3	Avg CM61-low-attachment	SD	Avg CM61-adherent	Avg CM61-low-attachment	LA/Adh	Log2FC
[truncated: 93 more rows]

[truncated: 4 more sheets: Downregulated in low attachment, LowAttachmentVsCOcultureVsNeut, Upregulated in Coculture, Downregulated in Coculture]
