# Supplementary material for: ALCAM: A Novel Surface Marker on EpCAMlow Circulating Tumor Cells
Source: Biomedicines. 2022 Aug 16;10(8):1983. doi: 10.3390/biomedicines10081983 (PMC9405826; doi:10.3390/biomedicines10081983)
Supplement: Supplementary file 1 [file biomedicines-10-01983-s001.zip › Supplementary File S5.xlsx]

## Sheet: ReactomeLowAttachmentUp
Pathway identifier	Pathway name	#Entities found	#Entities total	#Interactors found	#Interactors total	Entities ratio	Entities pValue	Entities FDR	#Reactions found	#Reactions total	Reactions ratio	Species identifier	Species name	Submitted entities found	Mapped entities	Submitted entities hit interactor	Interacts with	Found reaction identifiers
R-HSA-6798695	Neutrophil degranulation	17	480	0	0	0.0317797	3.59214e-08	4.27105e-05	10	10	0.000724953	9606	Homo sapiens	CD63;CLEC12A;ROCK1;CD300A;MVP;ATP6AP2;NME2;CALML3;MIF;SLC2A5;IGF2R;PYCARD;CEACAM1;PNP;CAPN1;CD14;LTF				R-HSA-6798743;R-HSA-6799350;R-HSA-6798739;R-HSA-6800434;R-HSA-6798751;R-HSA-6798749;R-HSA-6798748;R-HSA-6798747;R-HSA-6800426;R-HSA-6798745
R-HSA-8956321	Nucleotide salvage	4	69	0	2	0.00456833	0.00147412	0.585568	5	22	0.0015949	9606	Homo sapiens	PNP;TYMP;DAK				R-HSA-112033;R-HSA-112034;R-HSA-74372;R-HSA-112266;R-HSA-74207
R-HSA-3000157	Laminin interactions	3	31	0	2	0.00205244	0.00154772	0.585568	11	15	0.00108743	9606	Homo sapiens	LAMA5;LAMA3;RHOBTB1				R-HSA-2426676;R-HSA-216048;R-HSA-3787997;R-HSA-2426450;R-HSA-2426530;R-HSA-2396083;R-HSA-4084505;R-HSA-3907292;R-HSA-2327803;R-HSA-216058;R-HSA-349626
R-HSA-3000178	ECM proteoglycans	5	79	1	53	0.0052304	0.00197161	0.585568	7	23	0.00166739	9606	Homo sapiens	LAMA5;PTPRS;LAMA3;ITGA2B;LRP4	P08514;Q16787;O15230;Q13332;O75096	C1QBP	P04004	R-HSA-2426471;R-HSA-2467633;R-HSA-2396370;R-HSA-2396124;R-HSA-2396079;R-HSA-2465883;R-HSA-2467659
R-HSA-9013106	RHOC GTPase cycle	4	79	0	7	0.0052304	0.00281576	0.589187	2	6	0.000434972	9606	Homo sapiens	STARD13;ROCK1;C1QBP;ARHGAP1				R-HSA-9013111;R-HSA-9013110
R-HSA-8980692	RHOA GTPase cycle	5	154	0	0	0.010196	0.00418168	0.589187	3	6	0.000434972	9606	Homo sapiens	STARD13;ROCK1;C1QBP;ARHGAP1;DEF6				R-HSA-9013009;R-HSA-8980691;R-HSA-8981637
R-HSA-9013404	RAC2 GTPase cycle	4	92	0	7	0.0060911	0.00465143	0.589187	4	10	0.000724953	9606	Homo sapiens	NCF1;ARHGAP1;WASF2;DEF6				R-HSA-9014296;R-HSA-9014424;R-HSA-9014295;R-HSA-9014294
R-HSA-5362768	Hh mutants are degraded by ERAD	3	61	0	3	0.00403867	0.00969786	0.589187	5	6	0.000434972	9606	Homo sapiens	PSMD10;ERLEC1;UBA52				R-HSA-5387392;R-HSA-5362450;R-HSA-5483238;R-HSA-5387386;R-HSA-5387389
R-HSA-5387390	Hh mutants abrogate ligand secretion	3	64	0	4	0.00423729	0.0114076	0.589187	5	7	0.000507467	9606	Homo sapiens	PSMD10;ERLEC1;UBA52				R-HSA-5387392;R-HSA-5362450;R-HSA-5483238;R-HSA-5387386;R-HSA-5387389
R-HSA-9645722	Defective Intrinsic Pathway for Apoptosis Due to p14ARF Loss of Function	1	2	0	0	0.000132415	0.0134513	0.589187	1	1	7.24953e-05	9606	Homo sapiens	C1QBP				R-HSA-9645766
R-HSA-9012999	RHO GTPase cycle	9	460	0	111	0.0304555	0.014081	0.589187	33	91	0.00659707	9606	Homo sapiens	GJA1;STARD13;NCF1;ROCK1;C1QBP;ARHGAP1;WASF2;DEF6;RHOBTB1				R-HSA-8981637;R-HSA-9018758;R-HSA-9013145;R-HSA-9014296;R-HSA-9013144;R-HSA-9014424;R-HSA-9018778;R-HSA-9693125;R-HSA-9013022;R-HSA-9013009;R-HSA-9017488;R-HSA-9696266;R-HSA-8980691;R-HSA-9693198;R-HSA-9013143;R-HSA-9014295;R-HSA-9018774;R-HSA-9014294;R-HSA-9696268;R-HSA-9013161;R-HSA-9013024;R-HSA-9017507;R-HSA-9014434;R-HSA-9013157;R-HSA-9013159;R-HSA-9018745;R-HSA-9693282;R-HSA-9018808;R-HSA-9…
R-HSA-9013026	RHOB GTPase cycle	3	75	0	0	0.00496557	0.014793	0.589187	2	6	0.000434972	9606	Homo sapiens	STARD13;ROCK1;ARHGAP1				R-HSA-9013022;R-HSA-9013024
R-HSA-9013422	RHOBTB1 GTPase cycle	2	24	0	7	0.00158898	0.0190826	0.589187	2	2	0.000144991	9606	Homo sapiens	ROCK1;RHOBTB1				R-HSA-9018778;R-HSA-9018774
R-HSA-2979096	NOTCH2 Activation and Transmission of Signal to the Nucleus	2	23	1	8	0.00152278	0.0190826	0.589187	5	11	0.000797448	9606	Homo sapiens	CNTN1;UBA52	Q12860;P62987	CD46	P78504	R-HSA-2220816;R-HSA-1980056;R-HSA-2974731;R-HSA-2172172;R-HSA-157629

## Sheet: ReactomeLowAttachmentDown
Pathway identifier	Pathway name	#Entities found	#Entities total	#Interactors found	#Interactors total	Entities ratio	Entities pValue	Entities FDR	#Reactions found	#Reactions total	Reactions ratio	Species identifier	Species name	Submitted entities found	Mapped entities	Submitted entities hit interactor	Interacts with	Found reaction identifiers
R-HSA-6798695	Neutrophil degranulation	13	480	0	0	0.0317797	1.02515e-05	0.00941087	10	10	0.000724953	9606	Homo sapiens	RAB5C;CALML5;ARG1;HP;GGH;CYBA;OLFM4;CLEC4D;ALDH3B1;OSTF1;CD47;PGM1;TXNDC5				R-HSA-6798743;R-HSA-6799350;R-HSA-6798739;R-HSA-6800434;R-HSA-6798751;R-HSA-6798749;R-HSA-6798748;R-HSA-6798747;R-HSA-6800426;R-HSA-6798745
R-HSA-9007101	Rab regulation of trafficking	6	131	1	80	0.0086732	0.00175891	0.725597	7	35	0.00253734	9606	Homo sapiens	RABGAP1;RAB5C;ALS2;ARF6;RAB8B	P61020;P62330;Q96Q42;P51148;Q9Y3P9;Q92930	KRT19	Q9P0N9	R-HSA-8854182;R-HSA-8854293;R-HSA-8854303;R-HSA-8854222;R-HSA-8876190;R-HSA-8854302;R-HSA-8875320
R-HSA-9013409	RHOJ GTPase cycle	3	59	0	0	0.00390625	0.00608382	0.725597	2	3	0.000217486	9606	Homo sapiens	DOCK8;GBAS;VAMP3				R-HSA-9017491;R-HSA-9017507
R-HSA-8949664	Processing of SMDT1	2	17	1	6	0.00112553	0.00635379	0.725597	5	5	0.000362476	9606	Homo sapiens	PMPCB;EFHA1	O75439;Q8IYU8	EFHA1	Q9BPX6;Q9H4I9;Q8NE86	R-HSA-8949659;R-HSA-8949661;R-HSA-8949649;R-HSA-8949668;R-HSA-8953461
R-HSA-8876198	RAB GEFs exchange GTP for GDP on RABs	4	94	0	25	0.00622352	0.00646637	0.725597	2	21	0.0015224	9606	Homo sapiens	RAB5C;ALS2;RAB8B				R-HSA-8876190;R-HSA-8875320
R-HSA-8875656	MET receptor recycling	2	11	1	10	0.000728284	0.00701191	0.725597	2	2	0.000144991	9606	Homo sapiens	MET;ARF6	P62330;P08581	ARF6	Q9NZ52	R-HSA-8875661;R-HSA-8875659
R-HSA-8854214	TBC/RABGAPs	4	51	1	80	0.00337659	0.0076659	0.725597	5	14	0.00101493	9606	Homo sapiens	RABGAP1;RAB5C;ARF6;RAB8B	P62330;P51148;Q9Y3P9;Q92930	KRT19	Q9P0N9	R-HSA-8854182;R-HSA-8854293;R-HSA-8854303;R-HSA-8854222;R-HSA-8854302
R-HSA-9012999	RHO GTPase cycle	9	460	1	111	0.0304555	0.00812419	0.725597	20	91	0.00659707	9606	Homo sapiens	BCAP31;DIAPH2;WDR81;ALS2;DOCK8;CYBA;GBAS;VAMP3	P51572;O60879-3;Q96Q42;Q15836;Q8NF50;O75323;Q562E7;P13498;O60879	MET	P12931	R-HSA-9013004;R-HSA-9013024;R-HSA-9017507;R-HSA-9013157;R-HSA-9013159;R-HSA-9018758;R-HSA-9013145;R-HSA-9014424;R-HSA-9018808;R-HSA-9018746;R-HSA-9726848;R-HSA-9693125;R-HSA-9013438;R-HSA-9014449;R-HSA-9013009;R-HSA-9017491;R-HSA-9693198;R-HSA-9013143;R-HSA-9014294;R-HSA-9013110
R-HSA-9609523	Insertion of tail-anchored proteins into the endoplasmic reticulum membrane	2	25	0	0	0.00165519	0.010738	0.725597	6	7	0.000507467	9606	Homo sapiens	ASNA1;ANXA4				R-HSA-9609860;R-HSA-9610442;R-HSA-9617595;R-HSA-9609899;R-HSA-9617596;R-HSA-9609917

## Sheet: ReactomeCocultureUp
Pathway identifier	Pathway name	#Entities found	#Entities total	#Interactors found	#Interactors total	Entities ratio	Entities pValue	Entities FDR	#Reactions found	#Reactions total	Reactions ratio	Species identifier	Species name	Submitted entities found	Mapped entities	Submitted entities hit interactor	Interacts with	Found reaction identifiers
R-HSA-6798695	Neutrophil degranulation	24	480	0	0	0.0317797	1.28753e-12	1.63516e-09	10	10	0.000724953	9606	Homo sapiens	O00602;P50990;Q14764;P00491;P14618;P13639;Q13813;P07858;P22392;Q9Y2G3;P35030;Q9H3Z4;P14174;P07384;P04075;P02766;P46940;P02788;P06396;O15389;Q13464;P04264;P01024;P08962				R-HSA-6798743;R-HSA-6799350;R-HSA-6798739;R-HSA-6800434;R-HSA-6798751;R-HSA-6798749;R-HSA-6798748;R-HSA-6798747;R-HSA-6800426;R-HSA-6798745
R-HSA-156902	Peptide chain elongation	13	97	0	6	0.00642214	3.95828e-12	2.51351e-09	5	5	0.000362476	9606	Homo sapiens	P13639;P62829;P62917;P62081;Q02878;P84098;P15880;P39023;P62241;P62701;P62269;P62424;P46779				R-HSA-156930;R-HSA-156915;R-HSA-156912;R-HSA-156923;R-HSA-156907
R-HSA-156842	Eukaryotic Translation Elongation	14	102	3	59	0.00675318	5.43632e-11	2.29956e-08	7	9	0.000652458	9606	Homo sapiens	P26641;P13639;P62829;P62917;P62081;Q02878;P84098;P15880;P39023;P62241;P62701;P62269;P62424;P46779	P26641;P13639;P62829;P62917;P62081;Q02878;P84098;P15880;P39023;P62241;P62701;P62269;P62424;P46779	P26641;P26641;Q13011	P29692;P24534;P26641	R-HSA-156930;R-HSA-156915;R-HSA-156912;R-HSA-156913;R-HSA-156923;R-HSA-156907;R-HSA-156910
R-HSA-72764	Eukaryotic Translation Termination	12	106	0	4	0.00701801	1.27077e-10	3.95996e-08	3	5	0.000362476	9606	Homo sapiens	Q02878;P84098;P15880;P39023;P62829;P62917;P62241;P62701;P62081;P62269;P62424;P46779				R-HSA-141671;R-HSA-141691;R-HSA-141673
R-HSA-72689	Formation of a pool of free 40S subunits	12	106	0	7	0.00701801	1.55904e-10	3.95996e-08	2	2	0.000144991	9606	Homo sapiens	Q02878;P84098;P15880;P39023;P62829;P62917;P62241;P62701;P62081;P62269;P62424;P46779				R-HSA-72673;R-HSA-72676
R-HSA-2408557	Selenocysteine synthesis	12	112	0	3	0.00741525	2.31965e-10	4.89445e-08	2	7	0.000507467	9606	Homo sapiens	Q02878;P84098;P15880;P39023;P62829;P62917;P62241;P62701;P62081;P62269;P62424;P46779				R-HSA-2408529;R-HSA-5333615
R-HSA-1799339	SRP-dependent cotranslational protein targeting to membrane	12	119	0	0	0.00787871	3.40156e-10	6.15682e-08	5	5	0.000362476	9606	Homo sapiens	Q02878;P84098;P15880;P39023;P62829;P62917;P62241;P62701;P62081;P62269;P62424;P46779				R-HSA-1799326;R-HSA-1799330;R-HSA-1799329;R-HSA-1799335;R-HSA-1799332
R-HSA-975956	Nonsense Mediated Decay (NMD) independent of the Exon Junction Complex (EJC)	12	101	0	24	0.00668697	4.098e-10	6.47484e-08	1	1	7.24953e-05	9606	Homo sapiens	Q02878;P84098;P15880;P39023;P62829;P62917;P62241;P62701;P62081;P62269;P62424;P46779				R-HSA-927789
R-HSA-156827	L13a-mediated translational silencing of Ceruloplasmin expression	12	120	0	5	0.00794492	5.89025e-10	8.30526e-08	2	3	0.000217486	9606	Homo sapiens	Q02878;P84098;P15880;P39023;P62829;P62917;P62241;P62701;P62081;P62269;P62424;P46779				R-HSA-156823;R-HSA-156826
R-HSA-192823	Viral mRNA Translation	12	114	1	23	0.00754767	1.50267e-09	1.9084e-07	2	2	0.000144991	9606	Homo sapiens	Q02878;P84098;P15880;P39023;P62829;P62917;P62241;P62701;P62081;P62269;P62424;P46779	Q02878;P84098;P15880;P39023;P62829;P62917;P62241;P62701;P62081;P62269;P62424;P46779	O75832	Q12849	R-HSA-192704;R-HSA-192841
R-HSA-72706	GTP hydrolysis and joining of the 60S ribosomal subunit	12	120	0	59	0.00794492	1.42733e-08	1.64144e-06	3	3	0.000217486	9606	Homo sapiens	Q02878;P84098;P15880;P39023;P62829;P62917;P62241;P62701;P62081;P62269;P62424;P46779				R-HSA-72672;R-HSA-72619;R-HSA-72671
R-HSA-9010553	Regulation of expression of SLITs and ROBOs	14	183	2	93	0.012116	4.31919e-08	4.53515e-06	5	20	0.00144991	9606	Homo sapiens	O75832;P62829;P62917;P62081;Q02878;P84098;P15880;P39023;P62241;P62701;P40306;P62269;P62424;P46779	O75832;P62829;P62917;P62081;Q02878;P84098;P15880;P39023;P62241;P62701;P40306;P62269;P62424;P46779	Q17RB8;Q15365	P11940;P50458	R-HSA-9014652;R-HSA-9011313;R-HSA-9014610;R-HSA-9011074;R-HSA-9011077
R-HSA-2408522	Selenoamino acid metabolism	12	180	0	10	0.0119174	5.73294e-08	5.56095e-06	2	33	0.00239234	9606	Homo sapiens	Q02878;P84098;P15880;P39023;P62829;P62917;P62241;P62701;P62081;P62269;P62424;P46779				R-HSA-2408529;R-HSA-5333615
R-HSA-927802	Nonsense-Mediated Decay (NMD)	12	124	1	95	0.00820975	1.16017e-07	9.74542e-06	6	6	0.000434972	9606	Homo sapiens	Q02878;P84098;P15880;P39023;P62829;P62917;P62241;P62701;P62081;P62269;P62424;P46779	Q02878;P84098;P15880;P39023;P62829;P62917;P62241;P62701;P62081;P62269;P62424;P46779	Q15365	P11940	R-HSA-927836;R-HSA-927789;R-HSA-927832;R-HSA-927830;R-HSA-927813;R-HSA-927889
R-HSA-975957	Nonsense Mediated Decay (NMD) enhanced by the Exon Junction Complex (EJC)	12	124	1	95	0.00820975	1.16017e-07	9.74542e-06	5	5	0.000362476	9606	Homo sapiens	Q02878;P84098;P15880;P39023;P62829;P62917;P62241;P62701;P62081;P62269;P62424;P46779	Q02878;P84098;P15880;P39023;P62829;P62917;P62241;P62701;P62081;P62269;P62424;P46779	Q15365	P11940	R-HSA-927836;R-HSA-927832;R-HSA-927830;R-HSA-927813;R-HSA-927889
R-HSA-72737	Cap-dependent Translation Initiation	12	130	1	98	0.00860699	2.02645e-07	1.6009e-05	10	18	0.00130492	9606	Homo sapiens	Q02878;P84098;P15880;P39023;P62829;P62917;P62241;P62701;P62081;P62269;P62424;P46779	Q02878;P84098;P15880;P39023;P62829;P62917;P62241;P62701;P62081;P62269;P62424;P46779	Q15365	P11940	R-HSA-72673;R-HSA-72672;R-HSA-72691;R-HSA-72676;R-HSA-72697;R-HSA-72619;R-HSA-156808;R-HSA-157849;R-HSA-72621;R-HSA-72671
R-HSA-72613	Eukaryotic Translation Initiation	12	130	1	101	0.00860699	2.34608e-07	1.7361e-05	12	21	0.0015224	9606	Homo sapiens	Q02878;P84098;P15880;P39023;P62829;P62917;P62241;P62701;P62081;P62269;P62424;P46779	Q02878;P84098;P15880;P39023;P62829;P62917;P62241;P62701;P62081;P62269;P62424;P46779	Q15365	P11940	R-HSA-72673;R-HSA-72672;R-HSA-72691;R-HSA-72676;R-HSA-156823;R-HSA-156826;R-HSA-72697;R-HSA-72619;R-HSA-156808;R-HSA-157849;R-HSA-72621;R-HSA-72671
R-HSA-168273	Influenza Viral RNA Transcription and Replication	12	173	2	126	0.0114539	4.4568e-06	0.000311976	3	14	0.00101493	9606	Homo sapiens	Q02878;P84098;P15880;P39023;P62829;P62917;P62241;P62701;P62081;P62269;P62424;P46779	Q02878;P84098;P15880;P39023;P62829;P62917;P62241;P62701;P62081;P62269;P62424;P46779	Q8WVJ2;O75832	P07900;Q12849	R-HSA-192704;R-HSA-192841;R-HSA-192830
R-HSA-9633012	Response of EIF2AK4 (GCN2) to amino acid deficiency	12	115	1	195	0.00761388	7.37993e-06	0.000487075	10	16	0.00115992	9606	Homo sapiens	Q02878;P84098;P15880;P39023;P62829;P62917;P62241;P62701;P62081;P62269;P62424;P46779	Q02878;P84098;P15880;P39023;P62829;P62917;P62241;P62701;P62081;P62269;P62424;P46779	P02766	P18848	R-HSA-9633008;R-HSA-9635936;R-HSA-9635927;R-HSA-9635892;R-HSA-9635915;R-HSA-9633742;R-HSA-381128;R-HSA-9634669;R-HSA-9633005;R-HSA-9635804
R-HSA-6802952	Signaling by BRAF and RAF1 fusions	6	73	0	0	0.00483316	3.08604e-05	0.0019442	5	5	0.000362476	9606	Homo sapiens	P60709;P46940;P02545;P62158;Q7Z5R6;Q9Y490				R-HSA-6802935;R-HSA-6802934;R-HSA-6802933;R-HSA-6802932;R-HSA-6802927
R-HSA-9656223	Signaling by RAF1 mutants	5	49	0	0	0.00324417	5.25545e-05	0.00305181	5	7	0.000507467	9606	Homo sapiens	P60709;P46940;P62158;Q7Z5R6;Q9Y490				R-HSA-9656211;R-HSA-9656209;R-HSA-9656215;R-HSA-9656214;R-HSA-9656212
R-HSA-9711097	Cellular response to starvation	12	176	1	203	0.0116525	5.35405e-05	0.00305181	10	28	0.00202987	9606	Homo sapiens	Q02878;P84098;P15880;P39023;P62829;P62917;P62241;P62701;P62081;P62269;P62424;P46779	Q02878;P84098;P15880;P39023;P62829;P62917;P62241;P62701;P62081;P62269;P62424;P46779	P02766	P18848	R-HSA-9633008;R-HSA-9635936;R-HSA-9635927;R-HSA-9635892;R-HSA-9635915;R-HSA-9633742;R-HSA-381128;R-HSA-9634669;R-HSA-9633005;R-HSA-9635804
R-HSA-72695	Formation of the ternary complex, and subsequently, the 43S complex	5	54	0	0	0.00357521	8.27316e-05	0.00455024	1	3	0.000217486	9606	Homo sapiens	P15880;P62241;P62701;P62081;P62269				R-HSA-72691
R-HSA-9013422	RHOBTB1 GTPase cycle	4	24	0	7	0.00158898	0.000124492	0.0064736	1	2	0.000144991	9606	Homo sapiens	Q99832;P08670;Q16643;Q13464				R-HSA-9018778
R-HSA-9754678	SARS-CoV-2 modulates host translation machinery	5	62	0	0	0.00410487	0.00015682	0.00784101	1	6	0.000434972	9606	Homo sapiens	P15880;P62241;P62701;P62081;P62269				R-HSA-9729849
R-HSA-72702	Ribosomal scanning and start codon recognition	5	64	0	10	0.00423729	0.000273341	0.0124275	2	2	0.000144991	9606	Homo sapiens	P15880;P62241;P62701;P62081;P62269				R-HSA-72697;R-HSA-72621
R-HSA-6802957	Oncogenic MAPK signaling	6	93	1	18	0.00615731	0.000297431	0.0124275	32	46	0.00333478	9606	Homo sapiens	P60709;P46940;P02545;P62158;Q7Z5R6;Q9Y490	P60709;P0DP23;P46940;P02545;Q7Z5R6;Q9Y490	Q99623	P35232	R-HSA-6802919;R-HSA-9656211;R-HSA-6802918;R-HSA-9656209;R-HSA-6802916;R-HSA-9656215;R-HSA-6802915;R-HSA-6802914;R-HSA-6803234;R-HSA-9656214;R-HSA-6803233;R-HSA-6802912;R-HSA-9656212;R-HSA-6802927;R-HSA-6802926;R-HSA-6802925;R-HSA-6802924;R-HSA-6802922;R-HSA-6802921;R-HSA-6802935;R-HSA-6802934;R-HSA-6802933;R-HSA-6802932;R-HSA-6802943;R-HSA-6802942;R-HSA-6802941;R-HSA-6802937;R-HSA-6802911;R-HSA-6…
R-HSA-6802955	Paradoxical activation of RAF signaling by kinase inactive BRAF	5	54	1	18	0.00357521	0.000310687	0.0124275	6	7	0.000507467	9606	Homo sapiens	P60709;P46940;P62158;Q7Z5R6;Q9Y490	P60709;P0DP23;P46940;Q7Z5R6;Q9Y490	Q99623	P35232	R-HSA-6802918;R-HSA-6803234;R-HSA-6802943;R-HSA-6802942;R-HSA-6802941;R-HSA-6802937
R-HSA-9649948	Signaling downstream of RAS mutants	5	54	1	18	0.00357521	0.000310687	0.0124275	6	7	0.000507467	9606	Homo sapiens	P60709;P46940;P62158;Q7Z5R6;Q9Y490	P60709;P0DP23;P46940;Q7Z5R6;Q9Y490	Q99623	P35232	R-HSA-6803233;R-HSA-6802926;R-HSA-6802925;R-HSA-6802924;R-HSA-6802908;R-HSA-6802922
R-HSA-6802946	Signaling by moderate kinase activity BRAF mutants	5	54	1	18	0.00357521	0.000310687	0.0124275	6	7	0.000507467	9606	Homo sapiens	P60709;P46940;P62158;Q7Z5R6;Q9Y490	P60709;P0DP23;P46940;Q7Z5R6;Q9Y490	Q99623	P35232	R-HSA-6802919;R-HSA-6802916;R-HSA-6802915;R-HSA-6802914;R-HSA-6803230;R-HSA-6802921
R-HSA-6802949	Signaling by RAS mutants	5	54	1	18	0.00357521	0.000310687	0.0124275	6	9	0.000652458	9606	Homo sapiens	P60709;P46940;P62158;Q7Z5R6;Q9Y490	P60709;P0DP23;P46940;Q7Z5R6;Q9Y490	Q99623	P35232	R-HSA-6803233;R-HSA-6802926;R-HSA-6802925;R-HSA-6802924;R-HSA-6802908;R-HSA-6802922
R-HSA-9706574	RHOBTB GTPase Cycle	4	36	0	7	0.00238347	0.000427875	0.0166871	2	4	0.000289981	9606	Homo sapiens	Q99832;P08670;Q16643;Q13464				R-HSA-9018778;R-HSA-9018787
R-HSA-5626467	RHO GTPases activate IQGAPs	4	36	0	9	0.00238347	0.000466198	0.0172493	5	5	0.000362476	9606	Homo sapiens	P60709;P68363;P46940;P62158				R-HSA-5626549;R-HSA-5626469;R-HSA-5672304;R-HSA-5626507;R-HSA-5672329
R-HSA-6802948	Signaling by high-kinase activity BRAF mutants	4	44	0	0	0.00291314	0.000466198	0.0172493	4	6	0.000434972	9606	Homo sapiens	P60709;P46940;Q7Z5R6;Q9Y490				R-HSA-6802912;R-HSA-6802911;R-HSA-6802910;R-HSA-6803227
R-HSA-376176	Signaling by ROBO receptors	14	235	5	406	0.0155588	0.000489898	0.0176363	9	60	0.00434972	9606	Homo sapiens	O75832;P62829;P62917;P62081;Q02878;P84098;P15880;P39023;P62241;P62701;P40306;P62269;P62424;P46779	O75832;P62829;P62917;P62081;Q02878;P84098;P15880;P39023;P62241;P62701;P40306;P62269;P62424;P46779	Q9UNY5;P62805;Q17RB8;P46779;Q15365	P11940;P12931;P50458;P17252;P43146	R-HSA-9011241;R-HSA-9014652;R-HSA-373715;R-HSA-9011313;R-HSA-9010643;R-HSA-9014610;R-HSA-9011074;R-HSA-9011077;R-HSA-9010646
R-HSA-5674135	MAP2K and MAPK activation	4	49	0	0	0.00324417	0.000695242	0.0243335	8	12	0.000869943	9606	Homo sapiens	P60709;P46940;Q7Z5R6;Q9Y490				R-HSA-9657603;R-HSA-5672980;R-HSA-5672978;R-HSA-9657606;R-HSA-5672972;R-HSA-9657608;R-HSA-5672973;R-HSA-9657599
R-HSA-114608	Platelet degranulation	7	141	2	46	0.00933528	0.000810623	0.0275612	4	11	0.000797448	9606	Homo sapiens	P11021;O43707;P04075;P62158;P07996;Q9Y490;P08962	P11021;O43707;P0DP23;P04075;P07996;Q9Y490;P08962	P14625;P08670	P11021	R-HSA-482772;R-HSA-481010;R-HSA-481007;R-HSA-351323
R-HSA-163210	Formation of ATP by chemiosmotic coupling	3	23	0	0	0.00152278	0.000885975	0.0292372	3	3	0.000217486	9606	Homo sapiens	O75964;P48047;P56385				R-HSA-164834;R-HSA-164832;R-HSA-164840
R-HSA-416572	Sema4D induced cell migration and growth-cone collapse	3	25	0	0	0.00165519	0.00112458	0.0359866	4	7	0.000507467	9606	Homo sapiens	P35580;P60660;Q13464				R-HSA-9680443;R-HSA-419087;R-HSA-419197;R-HSA-419049
R-HSA-168255	Influenza Infection	12	198	3	358	0.0131091	0.00127922	0.038564	6	59	0.00427722	9606	Homo sapiens	Q02878;P84098;P15880;P39023;P62829;P62917;P62241;P62701;P62081;P62269;P62424;P46779	Q02878;P84098;P15880;P39023;P62829;P62917;P62241;P62701;P62081;P62269;P62424;P46779	Q8WVJ2;O75832;P20700	P07900;Q12849;P0DMV8;P52294	R-HSA-192704;R-HSA-168310;R-HSA-192746;R-HSA-192841;R-HSA-168297;R-HSA-192830
R-HSA-72649	Translation initiation complex formation	5	62	1	41	0.00410487	0.00128547	0.038564	2	2	0.000144991	9606	Homo sapiens	P15880;P62241;P62701;P62081;P62269	P15880;P62241;P62701;P62081;P62269	Q15365	P11940	R-HSA-156808;R-HSA-157849
R-HSA-389957	Prefoldin mediated transfer of substrate to CCT/TriC	3	29	0	0	0.00192002	0.00171491	0.0514473	2	2	0.000144991	9606	Homo sapiens	P50990;Q99832;P60709				R-HSA-389970;R-HSA-389980
R-HSA-9012999	RHO GTPase cycle	12	460	1	111	0.0304555	0.00187159	0.0528495	18	91	0.00659707	9606	Homo sapiens	Q99832;P20700;Q13813;P60709;P08670;Q9Y6W5;Q96C19;P68363;P46940;Q16643;Q13464;P14598	Q99832;P20700;Q13813;P60709;P08670;Q9Y6W5;Q96C19;P68363;P46940;Q16643;Q13464;P14598	Q9UNY5	P12931	R-HSA-9018794;R-HSA-9018766;R-HSA-9013024;R-HSA-9018787;R-HSA-9013157;R-HSA-9018758;R-HSA-9013145;R-HSA-9018808;R-HSA-9014424;R-HSA-9018778;R-HSA-9018746;R-HSA-9726848;R-HSA-9693125;R-HSA-9013009;R-HSA-9693198;R-HSA-9013110;R-HSA-9696268;R-HSA-9014294
R-HSA-389960	Formation of tubulin folding intermediates by CCT/TriC	3	30	0	0	0.00198623	0.00188748	0.0528495	2	2	0.000144991	9606	Homo sapiens	P50990;Q99832;P68363				R-HSA-389954;R-HSA-389961

## Sheet: ReactomeCocultureDown
Pathway identifier	Pathway name	#Entities found	#Entities total	#Interactors found	#Interactors total	Entities ratio	Entities pValue	Entities FDR	#Reactions found	#Reactions total	Reactions ratio	Species identifier	Species name	Submitted entities found	Mapped entities	Submitted entities hit interactor	Interacts with	Found reaction identifiers
R-HSA-6798695	Neutrophil degranulation	54	480	0	0	0.0317797	2.22045e-16	3.9857e-13	10	10	0.000724953	9606	Homo sapiens	P0DMV8;P80188;P30041;P13987;Q08722;P04839;P30484;Q12905;O60603;Q29940;P61020;Q9H0U3;P04080;Q02413;P09211;Q13442;P06744;P61916;Q9BV40;Q9Y315;Q9NZT1;P00738;Q6UX06;Q9BY15;P55160;Q8N6Q3;P31997;Q8WXI8;P12838;P12956;P48595;O00241;O75165;P30740;Q03405;Q01469;Q9Y5K8;Q99829;Q9Y336;P28676;P07339;P09917;P10620;P17980;Q86Y34;Q8IX19;P13498;P17931;P31151;Q5D862;Q9H1C7;Q9HD89;P05089;Q92820;Q14165				R-HSA-6798743;R-HSA-6799350;R-HSA-6798739;R-HSA-6800434;R-HSA-6798751;R-HSA-6798749;R-HSA-6798748;R-HSA-6798747;R-HSA-6800426;R-HSA-6798745
R-HSA-2467813	Separation of Sister Chromatids	18	195	0	27	0.0129105	8.22209e-05	0.0737522	5	8	0.000579962	9606	Homo sapiens	Q9UL46;P28065;P57740;P30154;P17980;Q7L7X3;Q9BUF5;Q9BVA1;P68366;P48556;Q8NFH4;Q13042;Q9H1A4;P43034;Q15691;O14777;Q9BQE3;Q9Y6D9				R-HSA-174144;R-HSA-2467809;R-HSA-2467811;R-HSA-174202;R-HSA-174121
R-HSA-389957	Prefoldin mediated transfer of substrate to CCT/TriC	6	29	0	0	0.00192002	0.000273899	0.142015	2	2	0.000144991	9606	Homo sapiens	Q9BUF5;P68366;Q9BVA1;O15212;O60925;Q9BQE3				R-HSA-389970;R-HSA-389980
R-HSA-3301854	Nuclear Pore Complex (NPC) Disassembly	7	42	0	0	0.00278072	0.000316997	0.142015	2	2	0.000144991	9606	Homo sapiens	P37198;P57740;Q9BVL2;Q8NFH4;O95067;P78406				R-HSA-2990880;R-HSA-2990882
R-HSA-5619107	Defective TPR may confer susceptibility towards thyroid papillary carcinoma (TPC)	6	36	0	0	0.00238347	0.000842073	0.302304	1	1	7.24953e-05	9606	Homo sapiens	P37198;P57740;Q9BVL2;Q8NFH4;P78406				R-HSA-5661474
R-HSA-5663220	RHO GTPases Activate Formins	15	149	3	55	0.00986494	0.00107664	0.321914	15	27	0.00195737	9606	Homo sapiens	P57740;P30154;Q7L7X3;O60879;Q9BUF5;P63261;Q9BVA1;P68366;Q8NFH4;P43034;Q15691;O14777;Q9BQE3;Q9Y6D9	P57740;P30154;Q7L7X3;Q9BUF5;O60879-2;O60879-3;P63261;Q9BVA1;P68366;Q8NFH4;P43034;Q15691;O14777;Q9BQE3;Q9Y6D9	Q9Y6N7;Q14192;P83916	P05556;Q8N9R8;O75044	R-HSA-5665751;R-HSA-5666160;R-HSA-5666129;R-HSA-5665809;R-HSA-5666001;R-HSA-5665982;R-HSA-5665659;R-HSA-5666008;R-HSA-5666104;R-HSA-5666169;R-HSA-5665767;R-HSA-5666049;R-HSA-5665802;R-HSA-203070;R-HSA-5666088
R-HSA-168325	Viral Messenger RNA Synthesis	8	69	0	7	0.00456833	0.00166524	0.409896	3	6	0.000434972	9606	Homo sapiens	P37198;P24928;P57740;Q9BVL2;Q8NFH4;P78406;P52434				R-HSA-192627;R-HSA-168326;R-HSA-192925
R-HSA-170822	Regulation of Glucokinase by Glucokinase Regulatory Protein	6	40	0	4	0.00264831	0.00182989	0.409896	1	5	0.000362476	9606	Homo sapiens	P37198;P57740;Q9BVL2;Q8NFH4;P78406				R-HSA-170796
R-HSA-190840	Microtubule-dependent trafficking of connexons from Golgi to the plasma membrane	4	22	0	0	0.00145657	0.00456514	0.760843	1	2	0.000144991	9606	Homo sapiens	Q9BUF5;P68366;Q9BVA1;Q9BQE3				R-HSA-190520
R-HSA-190872	Transport of connexons to the plasma membrane	4	23	0	0	0.00152278	0.00532857	0.760843	1	3	0.000217486	9606	Homo sapiens	Q9BUF5;P68366;Q9BVA1;Q9BQE3				R-HSA-190520
R-HSA-390466	Chaperonin-mediated protein folding	11	96	5	55	0.00635593	0.00591623	0.760843	15	19	0.00137741	9606	Homo sapiens	O95302;Q9BUF5;Q9HAV0;P50151;Q9BVA1;P68366;O15212;O95837;P19784;O60925;Q9BQE3	O95302;Q9BUF5;Q9HAV0;P50151;Q9BVA1;P68366;O15212;O95837;P19784;O60925;Q9BQE3	P42858;P63261;P50402;Q14192;Q16543	Q9NYA1;P60709	R-HSA-6814119;R-HSA-390470;R-HSA-389954;R-HSA-8850560;R-HSA-391266;R-HSA-6814124;R-HSA-389961;R-HSA-6814409;R-HSA-6814121;R-HSA-6814120;R-HSA-390453;R-HSA-6814418;R-HSA-389970;R-HSA-8850527;R-HSA-389980
R-HSA-9609523	Insertion of tail-anchored proteins into the endoplasmic reticulum membrane	4	25	0	0	0.00165519	0.00710175	0.760843	7	7	0.000507467	9606	Homo sapiens	O43681;O43765;P09601;P50402				R-HSA-9609921;R-HSA-9609860;R-HSA-9610442;R-HSA-9617595;R-HSA-9609899;R-HSA-9617596;R-HSA-9609917
R-HSA-6811436	COPI-independent Golgi-to-ER retrograde traffic	8	63	3	35	0.00417108	0.00756563	0.760843	4	7	0.000507467	9606	Homo sapiens	O75935;P61163;Q9BUF5;P68366;Q9BVA1;P43034;Q9BTE1;Q9BQE3	O75935;P61163;Q9BUF5;P68366;Q9BVA1;P43034;Q9BTE1;Q9BQE3	Q9NWU2;Q9Y320;Q15691	Q9NRZ7;P43034	R-HSA-8849350;R-HSA-8848484;R-HSA-8849345;R-HSA-8849353
R-HSA-68882	Mitotic Anaphase	24	249	7	250	0.0164857	0.00793609	0.760843	21	32	0.00231985	9606	Homo sapiens	Q9UL46;P28065;P57740;Q14739;P30154;P17980;O95067;Q7L7X3;P50402;P37198;Q9BUF5;Q9BVA1;P68366;P48556;Q8NFH4;Q13042;Q9H1A4;Q9BVL2;P43034;Q15691;O14777;Q9BQE3;Q9Y6D9	Q9UL46;Q9BVL2-2;P28065;Q9BVL2-1;P57740;Q14739;P30154;P17980;O95067;Q7L7X3;P50402;P37198;Q9BUF5;Q9BVA1;P68366;P48556;Q8NFH4;Q13042;Q9H1A4;P43034;Q15691;O14777;Q9BQE3;Q9Y6D9	P42858;Q9BVL2;Q8NFH4;Q9H6Z4;Q04206;O00629;P57740	P18754;Q8IXJ6;Q14974;Q8WYP5;Q9H444;O43633;P63279;Q8WUX9	R-HSA-174144;R-HSA-9667952;R-HSA-2467809;R-HSA-2467811;R-HSA-9634169;R-HSA-174121;R-HSA-9668415;R-HSA-3000449;R-HSA-9624798;R-HSA-9615901;R-HSA-9668419;R-HSA-9624800;R-HSA-9615937;R-HSA-9634219;R-HSA-9618378;R-HSA-174202;R-HSA-9615945;R-HSA-9668335;R-HSA-9668398;R-HSA-2995376;R-HSA-9624845
R-HSA-429914	Deadenylation-dependent mRNA decay	10	65	6	82	0.0043035	0.00910057	0.760843	9	10	0.000724953	9606	Homo sapiens	Q9H074;Q5RKV6;Q9GZS3;Q96C86;Q9UKZ1;P26196;Q9Y333;P62312;O95453;P06730	Q9H074;Q5RKV6;Q9GZS3;Q96C86;Q9UKZ1;P26196;Q9Y333;P62312;O95453;P06730	Q9H074;P35568;Q96C86;Q8TEQ6;Q13283;P06730	Q04637;P11940;Q96C86;P06730	R-HSA-429860;R-HSA-429845;R-HSA-430021;R-HSA-429955;R-HSA-8941312;R-HSA-430028;R-HSA-429978;R-HSA-429992;R-HSA-429961
R-HSA-380320	Recruitment of NuMA to mitotic centrosomes	8	97	0	0	0.00642214	0.00957739	0.760843	2	2	0.000144991	9606	Homo sapiens	O75935;P61163;Q9BUF5;P68366;Q9BVA1;P43034;Q15691;Q9BQE3				R-HSA-380316;R-HSA-380508
R-HSA-9706574	RHOBTB GTPase Cycle	5	36	0	7	0.00238347	0.0100155	0.760843	3	4	0.000289981	9606	Homo sapiens	Q9NYL9;P63261;Q16543;Q13098;Q7Z6E9				R-HSA-9018778;R-HSA-9018785;R-HSA-9018787
R-HSA-68877	Mitotic Prometaphase	17	211	1	101	0.0139698	0.0106491	0.760843	16	20	0.00144991	9606	Homo sapiens	O75935;P57740;Q9BPX3;P30154;P19784;O95067;Q7L7X3;P61163;Q9BUF5;Q9BVA1;P68366;Q8NFH4;P43034;Q15691;O14777;Q9BQE3;Q9Y6D9	O75935;P57740;Q9BPX3;P30154;P19784;O95067;Q7L7X3;P61163;Q9BUF5;Q9BVA1;P68366;Q8NFH4;P43034;Q15691;O14777;Q9BQE3;Q9Y6D9	Q9Y6Y0	P53350	R-HSA-2514854;R-HSA-2468293;R-HSA-9648114;R-HSA-9648017;R-HSA-375302;R-HSA-156682;R-HSA-1638803;R-HSA-2529015;R-HSA-2466068;R-HSA-2484822;R-HSA-2520883;R-HSA-380316;R-HSA-380508;R-HSA-2468287;R-HSA-2529020;R-HSA-1638821
R-HSA-2514853	Condensation of Prometaphase Chromosomes	3	15	0	0	0.000993114	0.0106717	0.760843	4	4	0.000289981	9606	Homo sapiens	P19784;Q9BPX3;O95067				R-HSA-2514854;R-HSA-2529015;R-HSA-2520883;R-HSA-2529020
R-HSA-5578749	Transcriptional regulation by small RNAs	8	81	1	20	0.00536282	0.0107209	0.760843	3	5	0.000362476	9606	Homo sapiens	P37198;P24928;P57740;Q9BVL2;Q8NFH4;P78406;P52434	P37198;P24928;Q9BVL2-2;Q9BVL2-1;P57740;Q8NFH4;P78406;P52434	P26196	Q8NDV7	R-HSA-5578965;R-HSA-5578742;R-HSA-5578744
R-HSA-5626467	RHO GTPases activate IQGAPs	5	36	3	9	0.00238347	0.0109706	0.760843	3	5	0.000362476	9606	Homo sapiens	Q9BUF5;P63261;P68366;Q9BVA1;Q9BQE3	Q9BUF5;P63261;P68366;Q9BVA1;Q9BQE3	P61964;P68366;Q15691	P30622;O00255	R-HSA-5672304;R-HSA-5626507;R-HSA-5672329
R-HSA-5620916	VxPx cargo-targeting to cilium	4	25	0	4	0.00165519	0.0117258	0.760843	2	10	0.000724953	9606	Homo sapiens	Q8TAG9;Q8IYI6;O00471;Q96A65				R-HSA-5623524;R-HSA-5623527
R-HSA-1268020	Mitochondrial protein import	7	69	1	15	0.00456833	0.0125513	0.760843	11	14	0.00101493	9606	Homo sapiens	Q99798;O75439;Q9BVV7;Q9Y5J9;O96008;O75431;Q96DA6	Q99798;O75439;Q9BVV7;Q9Y5J9;O96008;O75431;Q96DA6	O00303	Q9Y5J6	R-HSA-1299475;R-HSA-1268022;R-HSA-1299478;R-HSA-1299476;R-HSA-1955380;R-HSA-1299482;R-HSA-1307802;R-HSA-1268025;R-HSA-1299480;R-HSA-1299487;R-HSA-1299484
R-HSA-2500257	Resolution of Sister Chromatid Cohesion	13	134	1	85	0.00887182	0.0126652	0.760843	6	8	0.000579962	9606	Homo sapiens	P57740;P30154;O95067;Q7L7X3;Q9BUF5;Q9BVA1;P68366;Q8NFH4;P43034;Q15691;O14777;Q9BQE3;Q9Y6D9	P57740;P30154;O95067;Q7L7X3;Q9BUF5;Q9BVA1;P68366;Q8NFH4;P43034;Q15691;O14777;Q9BQE3;Q9Y6D9	Q9Y6Y0	P53350	R-HSA-2468293;R-HSA-2466068;R-HSA-2484822;R-HSA-1638803;R-HSA-2468287;R-HSA-1638821
R-HSA-2428933	SHC-related events triggered by IGF1R	3	16	0	0	0.00105932	0.012673	0.760843	5	5	0.000362476	9606	Homo sapiens	P29353				R-HSA-2404193;R-HSA-2404195;R-HSA-5686318;R-HSA-5686072;R-HSA-5686073
R-HSA-9609507	Protein localization	15	170	3	105	0.0112553	0.0129434	0.760843	27	53	0.00384225	9606	Homo sapiens	O43681;O75439;Q9BVV7;O96008;P14735;O75431;O43765;P50402;Q99798;Q9Y5J9;Q9NUI1;Q9UJ83;P09601;Q96DA6;O14734	O43681;O75439;Q9BVV7;O96008;P14735;O75431;O43765;P50402;Q99798;Q9Y5J9;Q9NUI1;Q9UJ83;P09601;Q96DA6;O14734	Q9Y320;O00303;P29353	Q93008;Q9Y5Y5;Q9Y5J6	R-HSA-1299475;R-HSA-1299478;R-HSA-1299476;R-HSA-9603797;R-HSA-1299482;R-HSA-1307802;R-HSA-1299480;R-HSA-1299487;R-HSA-1299484;R-HSA-9033478;R-HSA-9609921;R-HSA-9609860;R-HSA-9610442;R-HSA-9033233;R-HSA-9033235;R-HSA-9033491;R-HSA-9033236;R-HSA-9603791;R-HSA-1268022;R-HSA-9617595;R-HSA-1955380;R-HSA-1268025;R-HSA-9033509;R-HSA-9617596;R-HSA-9609917;R-HSA-9609899;R-HSA-9033526
R-HSA-389960	Formation of tubulin folding intermediates by CCT/TriC	4	30	0	0	0.00198623	0.0131235	0.760843	2	2	0.000144991	9606	Homo sapiens	Q9BUF5;P68366;Q9BVA1;Q9BQE3				R-HSA-389954;R-HSA-389961
R-HSA-174084	Autodegradation of Cdh1 by Cdh1:APC/C	6	64	0	0	0.00423729	0.0133426	0.760843	2	2	0.000144991	9606	Homo sapiens	Q9UL46;P28065;P48556;Q9H1A4;Q13042;P17980				R-HSA-174058;R-HSA-174057
R-HSA-180910	Vpr-mediated nuclear import of PICs	6	44	0	21	0.00291314	0.0133426	0.760843	1	2	0.000144991	9606	Homo sapiens	P37198;P57740;Q9BVL2;Q8NFH4;P78406				R-HSA-180622
R-HSA-6807878	COPI-mediated anterograde transport	13	107	4	113	0.00708422	0.014055	0.760843	11	12	0.000869943	9606	Homo sapiens	O75935;Q12955;P13987;P54920;P84085;P61163;Q9BUF5;Q9BVA1;P68366;P61204;P61923;Q9BTE1;Q9BQE3	O75935;Q12955;P13987;P54920;P84085;P61163;Q9BUF5;Q9BVA1;P68366;P61204;P61923;Q9BTE1;Q9BQE3	P54920;P42858;Q9Y320;Q9Y371	Q13190;O15155;Q12893	R-HSA-6809015;R-HSA-6809014;R-HSA-6807877;R-HSA-6807875;R-HSA-6809011;R-HSA-6809010;R-HSA-6807872;R-HSA-6809006;R-HSA-6807868;R-HSA-6809003;R-HSA-6807866
R-HSA-168333	NEP/NS2 Interacts with the Cellular Export Machinery	6	53	0	12	0.003509	0.0142906	0.760843	1	2	0.000144991	9606	Homo sapiens	P37198;P57740;Q9BVL2;Q8NFH4;P78406				R-HSA-168880
R-HSA-77387	Insulin receptor recycling	4	28	1	3	0.00185381	0.0146231	0.760843	2	6	0.000434972	9606	Homo sapiens	Q9Y5K8;O75348;P21283;P61421	Q9Y5K8;O75348;P21283;P61421	P42858	Q15904	R-HSA-74723;R-HSA-5252133
R-HSA-391251	Protein folding	11	102	5	70	0.00675318	0.0146316	0.760843	24	28	0.00202987	9606	Homo sapiens	O95302;Q9BUF5;Q9HAV0;P50151;Q9BVA1;P68366;O15212;O95837;P19784;O60925;Q9BQE3	O95302;Q9BUF5;Q9HAV0;P50151;Q9BVA1;P68366;O15212;O95837;P19784;O60925;Q9BQE3	P42858;P63261;P50402;Q14192;Q16543	Q9NYA1;P60709	R-HSA-6814119;R-HSA-389956;R-HSA-390470;R-HSA-389955;R-HSA-389954;R-HSA-8850560;R-HSA-391266;R-HSA-389964;R-HSA-6814124;R-HSA-389961;R-HSA-389963;R-HSA-6814121;R-HSA-6814409;R-HSA-6814120;R-HSA-390453;R-HSA-389972;R-HSA-389974;R-HSA-389969;R-HSA-6814418;R-HSA-389970;R-HSA-8850527;R-HSA-389980;R-HSA-389976;R-HSA-389978
R-HSA-168274	Export of Viral Ribonucleoproteins from Nucleus	7	54	1	37	0.00357521	0.0149823	0.7641	2	5	0.000362476	9606	Homo sapiens	P37198;P0DMV8;P57740;Q9BVL2;Q8NFH4;P78406	P37198;P0DMV8;Q9BVL2-2;Q9BVL2-1;P57740;Q8NFH4;P78406	P42858	P0DMV8	R-HSA-168880;R-HSA-192746
R-HSA-176033	Interactions of Vpr with host cellular proteins	6	47	0	21	0.00311176	0.0163255	0.799949	1	4	0.000289981	9606	Homo sapiens	P37198;P57740;Q9BVL2;Q8NFH4;P78406				R-HSA-180622
R-HSA-168276	NS1 Mediated Effects on Host Pathways	7	46	3	44	0.00304555	0.0187216	0.898636	4	6	0.000434972	9606	Homo sapiens	P37198;O00629;P57740;Q9BVL2;Q8NFH4;P78406	P37198;Q9BVL2-2;O00629;Q9BVL2-1;P57740;Q8NFH4;P78406	Q9NX58;Q6P1J9;O75569-1	O95639;P19525	R-HSA-168896;R-HSA-168859;R-HSA-1176059;R-HSA-6791035
R-HSA-70171	Glycolysis	8	110	0	4	0.00728284	0.0197994	0.899205	3	24	0.00173989	9606	Homo sapiens	P06744;P37198;P57740;Q9BVL2;Q8NFH4;P30154;P78406				R-HSA-163750;R-HSA-70471;R-HSA-170796

## Sheet: GOLowAttachmentBP
Enrichment FDR	nGenes	Pathway Genes	Fold Enrichment	Pathway	URL	Genes
0.00117481	3	13	59.108	Peptidyl-methionine modification	http://amigo.geneontology.org/amigo/term/GO:0018206	METAP2 METAP1 NAA16
0.00166581	3	15	51.227	Negative regulation of cell migration involved in sprouting angiogenesis	http://amigo.geneontology.org/amigo/term/GO:0090051	PDCD10 STARD13 THBS1
0.00160649	4	43	23.8265	Regulation of transforming growth factor beta production	http://amigo.geneontology.org/amigo/term/GO:0071634	FBLN1 CD46 THBS1 ATP6AP2
0.00395238	3	23	33.4089	Positive regulation of transforming growth factor beta production	http://amigo.geneontology.org/amigo/term/GO:0071636	CD46 THBS1 ATP6AP2
0.00668372	2	6	85.3783	Negative regulation of blood vessel endothelial cell proliferation involved in sprouting angiogenesis	http://amigo.geneontology.org/amigo/term/GO:1903588	PDCD10 THBS1
0.00114234	6	135	11.3838	Regulation of pattern recognition receptor signaling pathway	http://amigo.geneontology.org/amigo/term/GO:0062207	LTF PTPRS C1QBP TKFC CD300A CD14
0.0083059	2	7	73.1814	Positive regulation of transforming growth factor beta1 production	http://amigo.geneontology.org/amigo/term/GO:0032914	THBS1 ATP6AP2
0.0083059	2	7	73.1814	Regulation of MDA-5 signaling pathway	http://amigo.geneontology.org/amigo/term/GO:0039533	C1QBP TKFC
6.99669e-07	16	584	7.01739	Neutrophil activation involved in immune response	http://amigo.geneontology.org/amigo/term/GO:0002283	LTF MVP CAPN1 ROCK1 CEACAM1 PYCARD CD63 SLC2A5 CD300A CD14 CLEC12A ATP6AP2 IGF2R PNP NME2 MIF
0.00404239	4	62	16.5248	Phagocytosis, engulfment	http://amigo.geneontology.org/amigo/term/GO:0006911	RHOBTB1 THBS1 CD300A AIF1
6.99669e-07	18	785	5.87316	Myeloid leukocyte activation	http://amigo.geneontology.org/amigo/term/GO:0002274	LTF MVP CAPN1 ROCK1 CEACAM1 PYCARD CD63 THBS1 SLC2A5 CD300A CD14 CLEC12A ATP6AP2 IGF2R PNP AIF1 NME2 MIF
0.00788047	3	33	23.285	Postsynapse assembly	http://amigo.geneontology.org/amigo/term/GO:0099068	PTPRS LRP4 GAP43
0.0047484	5	124	10.328	Integrin-mediated signaling pathway	http://amigo.geneontology.org/amigo/term/GO:0007229	ITGA2B CEACAM1 LAMA5 CD63 NME2
0.000671277	10	434	5.90172	Ameboidal-type cell migration	http://amigo.geneontology.org/amigo/term/GO:0001667	ROCK1 CEACAM1 C1QBP PDCD10 LAMA5 STARD13 THBS1 GJA1 WASF2 S100A2
0.00225327	7	238	7.53338	Regulation of leukocyte migration	http://amigo.geneontology.org/amigo/term/GO:0002685	ITGA2B PYCARD C1QBP THBS1 CD300A AIF1 MIF
0.0131868	2	10	51.227	Long-chain fatty acid import across plasma membrane	http://amigo.geneontology.org/amigo/term/GO:0015911	SLC27A1 THBS1
2.32343e-06	18	903	5.10568	Regulated exocytosis	http://amigo.geneontology.org/amigo/term/GO:0045055	ITGA2B LTF MVP CAPN1 ROCK1 CEACAM1 PYCARD CD63 THBS1 SLC2A5 CD300A CD14 CLEC12A ATP6AP2 IGF2R PNP NME2 MIF
0.000147978	13	637	5.22724	Endocytosis	http://amigo.geneontology.org/amigo/term/GO:0006897	ROCK1 RHOBTB1 CEACAM1 PYCARD LRP4 CD63 THBS1 ILDR1 WASF2 CD300A CD14 IGF2R AIF1
0.00178578	8	308	6.65285	Phagocytosis	http://amigo.geneontology.org/amigo/term/GO:0006909	RHOBTB1 PYCARD THBS1 WASF2 CD300A CD14 FCGR3A AIF1
0.00972122	3	37	20.7677	MyD88-dependent toll-like receptor signaling pathway	http://amigo.geneontology.org/amigo/term/GO:0002755	CD300A CD14 UBA52

## Sheet: GOLowAttachmentCC
Enrichment FDR	nGenes	Pathway Genes	Fold Enrichment	Pathway	URL	Genes
1.32457e-05	11	357	7.89211	Secretory granule membrane	http://amigo.geneontology.org/amigo/term/GO:0030667	ITGA2B SRI CEACAM1 CD46 CD63 SLC2A5 CD300A CD14 CLEC12A ATP6AP2 IGF2R
0.00136109	7	224	8.00421	Ficolin-1-rich granule	http://amigo.geneontology.org/amigo/term/GO:0101002	MVP CAPN1 CD300A ATP6AP2 PNP NME2 MIF
4.04848e-08	21	975	5.51675	Secretory granule	http://amigo.geneontology.org/amigo/term/GO:0030141	ITGA2B LTF MVP CAPN1 ROCK1 SRI CEACAM1 PYCARD CD46 CD63 CTSV THBS1 SLC2A5 CD300A CD14 CLEC12A ATP6AP2 IGF2R PNP NME2 MIF
0.0064397	5	143	8.95576	Ficolin-1-rich granule lumen	http://amigo.geneontology.org/amigo/term/GO:1904813	MVP CAPN1 PNP NME2 MIF
0.0169175	4	106	9.66547	Tertiary granule membrane	http://amigo.geneontology.org/amigo/term/GO:0070821	CEACAM1 CD300A CLEC12A ATP6AP2
0.0291676	2	17	30.1335	T cell receptor complex	http://amigo.geneontology.org/amigo/term/GO:0042101	APBB1IP CEACAM1
0.0291676	2	17	30.1335	Inflammasome complex	http://amigo.geneontology.org/amigo/term/GO:0061702	NLRC4 PYCARD
0.00565065	6	214	7.18135	Lamellipodium	http://amigo.geneontology.org/amigo/term/GO:0030027	ROCK1 APBB1IP WASF2 FGD6 AIF1 NME2
1.32457e-05	17	960	4.53572	Cell surface	http://amigo.geneontology.org/amigo/term/GO:0009986	ITGA2B LTF FAS CEACAM1 C1QBP CD46 LRP4 CD63 CTSV THBS1 PCSK6 FOLR2 CD14 ATP6AP2 IGF2R FCGR3A MIF
0.00367831	8	374	5.47882	Vesicle lumen	http://amigo.geneontology.org/amigo/term/GO:0031983	LTF MVP ROCK1 PYCARD THBS1 PNP NME2 MIF
0.0291676	3	63	12.1969	Anchored component of plasma membrane	http://amigo.geneontology.org/amigo/term/GO:0046658	CNTN1 FOLR2 CD14
0.0381893	2	20	25.6135	Anchored component of external side of plasma membrane	http://amigo.geneontology.org/amigo/term/GO:0031362	FOLR2 CD14
0.0262745	4	125	8.19631	Actin filament	http://amigo.geneontology.org/amigo/term/GO:0005884	POF1B HCLS1 RCSD1 AIF1
0.00565065	8	409	5.00997	External side of plasma membrane	http://amigo.geneontology.org/amigo/term/GO:0009897	ITGA2B FAS CTSV THBS1 FOLR2 CD14 ATP6AP2 FCGR3A
0.0184111	5	191	6.7051	Ruffle	http://amigo.geneontology.org/amigo/term/GO:0001726	ROCK1 WASF2 FGD6 AIF1 NME2
0.047275	2	23	22.2726	Proteasome regulatory particle	http://amigo.geneontology.org/amigo/term/GO:0005838	PSMD10 ADRM1
0.0259437	5	209	6.12763	Tertiary granule	http://amigo.geneontology.org/amigo/term/GO:0070820	LTF CEACAM1 CD300A CLEC12A ATP6AP2
0.0133647	17	1816	2.39774	Mitochondrion	http://amigo.geneontology.org/amigo/term/GO:0005739	CAPN1 SLC44A1 ACADVL SRI PYCARD DECR1 C1QBP ACAT2 SLC27A1 STARD13 GJA1 MIX23 CYB5A GPX4 HCLS1 UBA52 NME2
0.0381893	10	907	2.82398	Anchoring junction	http://amigo.geneontology.org/amigo/term/GO:0070161	ITGA2B CAPN1 APBB1IP CEACAM1 CD46 POF1B ILDR1 GJA1 WASF2 IGF2R

## Sheet: GOLowAttachmentMF
Enrichment FDR	nGenes	Pathway Genes	Fold Enrichment	Pathway	URL	Genes
0.00312811	4	39	26.2702	Aminopeptidase activity	http://amigo.geneontology.org/amigo/term/GO:0004177	BLMH METAP2 CTSV METAP1
0.00339099	4	44	23.285	Peptidase activator activity	http://amigo.geneontology.org/amigo/term/GO:0016504	FBLN1 NLRC4 PYCARD ADRM1
0.032315	2	10	51.227	IgG binding	http://amigo.geneontology.org/amigo/term/GO:0019864	PIP FCGR3A
0.0397066	2	13	39.4054	Endopeptidase activator activity	http://amigo.geneontology.org/amigo/term/GO:0061133	NLRC4 ADRM1
0.0149539	5	141	9.0828	SH3 domain binding	http://amigo.geneontology.org/amigo/term/GO:0017124	GJA1 WASF2 NCF1 ARHGAP1 HCLS1
0.0281408	4	94	10.8994	Modified amino acid binding	http://amigo.geneontology.org/amigo/term/GO:0072341	THBS1 FOLR2 CD300A GAP43
0.0397066	2	15	34.1513	Efflux transmembrane transporter activity	http://amigo.geneontology.org/amigo/term/GO:0015562	SLC27A1 GJA1
0.00312811	18	1446	3.1884	Protein-containing complex binding	http://amigo.geneontology.org/amigo/term/GO:0044877	ITGA2B PFKP FBLN1 C1QBP POF1B LAMA5 ADRM1 CTSV THBS1 WASF2 PIP NAA16 HCLS1 IGF2R RCSD1 FCGR3A AIF1 NME2
0.00416075	7	248	7.22961	Peptidase regulator activity	http://amigo.geneontology.org/amigo/term/GO:0061134	LTF ROCK1 FBLN1 NLRC4 PYCARD ADRM1 SERPINB5
0.00416075	16	1334	3.07208	Enzyme regulator activity	http://amigo.geneontology.org/amigo/term/GO:0030234	LTF ROCK1 FBLN1 NLRC4 PYCARD SIPA1L2 CKS2 DAD1 ADRM1 STARD13 NCF1 ARHGAP1 CALML3 FGD6 SERPINB5 RNH1
0.0397066	4	122	8.39786	Cysteine-type endopeptidase activity	http://amigo.geneontology.org/amigo/term/GO:0004197	CAPN1 PYCARD BLMH CTSV
0.0421516	3	62	12.3936	Phosphatidylserine binding	http://amigo.geneontology.org/amigo/term/GO:0001786	THBS1 CD300A GAP43
0.0397066	5	212	6.04092	Endopeptidase regulator activity	http://amigo.geneontology.org/amigo/term/GO:0061135	LTF ROCK1 NLRC4 ADRM1 SERPINB5
0.0397066	10	811	3.15826	Lipid binding	http://amigo.geneontology.org/amigo/term/GO:0008289	LTF AFP STARD13 THBS1 NCF1 CD300A CD14 GAP43 IGF2R NME2
0.0421516	9	711	3.24221	Peptidase activity	http://amigo.geneontology.org/amigo/term/GO:0008233	LTF CAPN1 PYCARD BLMH METAP2 CTSV PCSK6 PIP METAP1

## Sheet: GODownLowAttachmentBP
Enrichment FDR	nGenes	Pathway Genes	Fold Enrichment	Pathway	URL	Genes
0.00219164	3	9	53.1375	Chylomicron remodeling	http://amigo.geneontology.org/amigo/term/GO:0034371	APOA4 APOC3 APOA2
0.000260079	6	58	16.491	Hydrogen peroxide metabolic process	http://amigo.geneontology.org/amigo/term/GO:0042743	CYBA APOA4 SOD2 HBA2 NOXO1 HP
1.33292e-07	21	584	5.7323	Neutrophil activation involved in immune response	http://amigo.geneontology.org/amigo/term/GO:0002283	ALDH3B1 CYBA XRCC5 PGM1 CEACAM6 SNAP23 OLFM4 TSPAN14 RAB5C ARG1 OSTF1 GGH IDH1 CLEC4D CALML5 CD47 SERPINA1 C5AR1 TXNDC5 HP ALOX5
0.00596686	6	112	8.53996	Protein targeting to mitochondrion	http://amigo.geneontology.org/amigo/term/GO:0006626	TSPO PMPCB TOMM40 TIMM10B BCAP31 ATP5IF1
0.00453428	7	153	7.29339	Regulation of reactive oxygen species metabolic process	http://amigo.geneontology.org/amigo/term/GO:2000377	CYBA TSPO SOD2 DCXR NOXO1 HP ALOX5
0.014787	3	21	22.7732	Response to manganese ion	http://amigo.geneontology.org/amigo/term/GO:0010042	TSPO SOD2 ARG1
0.000370256	14	490	4.55465	Response to oxidative stress	http://amigo.geneontology.org/amigo/term/GO:0006979	ALS2 ALDH3B1 CYBA MET APOA4 SOD2 ARG1 IDH1 ARL6IP5 RELA SP1 HBA2 HP ALOX5
0.00275286	11	375	4.6761	Cellular response to chemical stress	http://amigo.geneontology.org/amigo/term/GO:0062197	ALDH3B1 CYBA XRCC5 TSPO MET APOA4 SOD2 ARG1 ARL6IP5 RELA ALOX5
0.00959847	6	127	7.5313	Acute inflammatory response	http://amigo.geneontology.org/amigo/term/GO:0002526	ICAM1 TREM1 IL1RN APOA2 SERPINA1 HP
0.0212488	2	6	53.1375	Isocitrate metabolic process	http://amigo.geneontology.org/amigo/term/GO:0006102	IDH3G IDH1
0.0212488	2	6	53.1375	Regulation of very-low-density lipoprotein particle remodeling	http://amigo.geneontology.org/amigo/term/GO:0010901	APOC3 APOA2
0.0159066	3	22	21.7381	Regulation of hydrogen peroxide metabolic process	http://amigo.geneontology.org/amigo/term/GO:0010310	SOD2 NOXO1 HP
0.0199602	3	25	19.1295	Tail-anchored membrane protein insertion into ER membrane	http://amigo.geneontology.org/amigo/term/GO:0071816	SGTA EMC6 GET3
0.00138442	16	717	3.55732	Negative regulation of cellular component organization	http://amigo.geneontology.org/amigo/term/GO:0051129	XRCC5 TPX2 TSPO ARHGEF7 MET DNAJB6 APOA4 APOC3 IK ARRB2 SNAPIN F11R APOA2 CLASP2 ARF6 PFDN6
0.0132607	6	138	6.93098	Regulation of endothelial cell proliferation	http://amigo.geneontology.org/amigo/term/GO:0001936	CYBA ARG1 RICTOR SP1 ALOX5 ATP5IF1
0.00896779	9	306	4.68861	Mitochondrial transport	http://amigo.geneontology.org/amigo/term/GO:0006839	ATP5F1D TSPO PMPCB TOMM40 TIMM10B MICU2 SLC25A10 BCAP31 ATP5IF1
0.00453428	13	556	3.72727	Positive regulation of cell migration	http://amigo.geneontology.org/amigo/term/GO:0030335	SYNE2 CEACAM6 ICAM1 ARHGEF7 MET DOCK8 SOD2 ELP3 CLASP2 ARF6 INSR SP1 C5AR1
0.0138544	6	140	6.83197	Response to hydrogen peroxide	http://amigo.geneontology.org/amigo/term/GO:0042542	MET SOD2 ARG1 RELA HBA2 HP
0.000128074	26	1418	2.92294	Regulation of hydrolase activity	http://amigo.geneontology.org/amigo/term/GO:0051336	ALS2 RABGAP1 RANBP3 ICAM1 ARHGEF7 MET DNAJB6 DOCK8 APOA4 APOC3 PPP1R7 MTCH1 PPP2R1B ARRB2 RCN3 ARL6IP5 ASAP1 F11R APOA2 RICTOR WDR81 BCAP31 CHP1 SERPINA1 C5AR1 ATP5IF1
0.000685593	20	1014	3.14423	Membrane organization	http://amigo.geneontology.org/amigo/term/GO:0061024	VAMP3 NUP37 SNAP23 ATP5F1D SGTA APOA4 PPP1R7 EMC6 TIMM10B MTCH1 ARRB2 SNAPIN ASAP1 APOA2 RAB8B LEMD3 PITPNA CHP1 SERPINA1 GET3

## Sheet: GODownLowAttachmentCC
Enrichment FDR	nGenes	Pathway Genes	Fold Enrichment	Pathway	URL	Genes
0.00376366	3	14	34.1598	Chylomicron	http://amigo.geneontology.org/amigo/term/GO:0042627	APOA4 APOC3 APOA2
0.00323871	5	67	11.8965	Tertiary granule lumen	http://amigo.geneontology.org/amigo/term/GO:1904724	PGM1 OLFM4 GGH IDH1 HP
9.6564e-05	10	209	7.6274	Tertiary granule	http://amigo.geneontology.org/amigo/term/GO:0070820	CYBA PGM1 SNAP23 OLFM4 TSPAN14 GGH IDH1 CLEC4D CD47 HP
9.6564e-05	10	212	7.51946	Specific granule	http://amigo.geneontology.org/amigo/term/GO:0042581	ALDH3B1 CYBA SNAP23 OLFM4 TSPAN14 ARG1 GGH CLEC4D CD47 HP
0.0051692	6	123	7.77622	Specific granule membrane	http://amigo.geneontology.org/amigo/term/GO:0035579	ALDH3B1 CYBA SNAP23 TSPAN14 CLEC4D CD47
2.37196e-06	24	975	3.924	Secretory granule	http://amigo.geneontology.org/amigo/term/GO:0030141	ALDH3B1 VAMP3 CYBA XRCC5 PGM1 CEACAM6 SNAP23 OLFM4 TSPAN14 RAB5C ARG1 OSTF1 GGH IDH1 SNAPIN SCCPDH CLEC4D CALML5 CD47 SERPINA1 C5AR1 TXNDC5 HP ALOX5
0.00144896	11	374	4.68861	Vesicle lumen	http://amigo.geneontology.org/amigo/term/GO:0031983	XRCC5 OLFM4 ARG1 OSTF1 GGH IDH1 SCCPDH SERPINA1 TXNDC5 HP ALOX5
0.0288113	2	11	28.9841	Haptoglobin-hemoglobin complex	http://amigo.geneontology.org/amigo/term/GO:0031838	HBA2 HP
0.00977276	6	143	6.68864	Ficolin-1-rich granule lumen	http://amigo.geneontology.org/amigo/term/GO:1904813	PGM1 OSTF1 IDH1 CALML5 SERPINA1 ALOX5
0.0139756	5	106	7.51946	Tertiary granule membrane	http://amigo.geneontology.org/amigo/term/GO:0070821	CYBA SNAP23 TSPAN14 CLEC4D CD47
0.0276933	4	82	7.77622	Specific granule lumen	http://amigo.geneontology.org/amigo/term/GO:0035580	OLFM4 ARG1 GGH HP
0.0337065	2	13	24.525	NADPH oxidase complex	http://amigo.geneontology.org/amigo/term/GO:0043020	CYBA NOXO1
0.0370461	2	14	22.7732	Spherical high-density lipoprotein particle	http://amigo.geneontology.org/amigo/term/GO:0034366	APOC3 APOA2
0.00542209	11	456	3.84548	Early endosome	http://amigo.geneontology.org/amigo/term/GO:0005769	ALS2 VAMP3 ITCH EHD4 RAB5C APOA4 APOC3 DIAPH2 APOA2 ARF6 WDR81
0.0146691	6	170	5.62633	Primary lysosome	http://amigo.geneontology.org/amigo/term/GO:0005766	CEACAM6 SNAP23 RAB5C ARG1 GGH TXNDC5
0.0273514	5	136	5.86076	Z disc	http://amigo.geneontology.org/amigo/term/GO:0030018	SYNE2 STUB1 DNAJB6 KRT19 PARVA
0.0104225	10	421	3.78652	Endocytic vesicle	http://amigo.geneontology.org/amigo/term/GO:0030139	VAMP3 CYBA SNAP23 EHD4 RAB5C ARRB2 ARF6 RAB8B HBA2 HP
0.0153915	10	471	3.38456	Focal adhesion	http://amigo.geneontology.org/amigo/term/GO:0005925	CYBA SYNE2 ICAM1 SNAP23 ARHGEF7 CAPN5 CLASP2 ARF6 CHP1 PARVA
0.0467608	4	107	5.95935	Recycling endosome membrane	http://amigo.geneontology.org/amigo/term/GO:0055038	VAMP3 EHD4 ARF6 RAB8B
0.0448639	6	241	3.96878	Organelle outer membrane	http://amigo.geneontology.org/amigo/term/GO:0031968	SYNE2 TSPO ARG1 TOMM40 MTCH1 NIPSNAP2

## Sheet: GODownLowAttachmentMF
Enrichment FDR	nGenes	Pathway Genes	Fold Enrichment	Pathway	URL	Genes
0.0296514	3	17	28.1316	Lipase inhibitor activity	http://amigo.geneontology.org/amigo/term/GO:0055102	APOC3 APOA2 ANXA4
0.0417044	2	6	53.1375	Phosphatidylcholine-sterol O-acyltransferase activator activity	http://amigo.geneontology.org/amigo/term/GO:0060228	APOA4 APOA2
0.0296514	4	50	12.753	Cholesterol binding	http://amigo.geneontology.org/amigo/term/GO:0015485	TSPO APOA4 APOC3 APOA2
0.00409792	23	1334	2.74849	Enzyme regulator activity	http://amigo.geneontology.org/amigo/term/GO:0030234	ALS2 RABGAP1 RANBP3 XRCC5 TPX2 ARHGEF7 DOCK8 APOA4 APOC3 PPP1R7 ELP3 PPP2R1B ASAP1 APOA2 RICTOR WDR81 CALML5 CHP1 NOXO1 ANXA4 SERPINA1 PARVA ATP5IF1
0.0463254	2	8	39.8531	TPR domain binding	http://amigo.geneontology.org/amigo/term/GO:0030911	STUB1 RAB8B
0.0296514	21	1446	2.31512	Protein-containing complex binding	http://amigo.geneontology.org/amigo/term/GO:0044877	ADAM22 WIZ SYNE2 ITCH XRCC5 ICAM1 SGTA PTPRZ1 MBD2 ARRB2 ZC3H18 F11R APOA2 CLASP2 RICTOR INSR KRT19 RELA H1-5 BCAP31 ATP5IF1
0.0463254	7	246	4.53613	Kinase regulator activity	http://amigo.geneontology.org/amigo/term/GO:0019207	ALS2 TPX2 ELP3 RICTOR WDR81 CHP1 PARVA
0.0463254	11	577	3.03906	Cell adhesion molecule binding	http://amigo.geneontology.org/amigo/term/GO:0050839	ADAM22 ICAM1 OLFM4 EHD4 PTPRZ1 IDH1 ASAP1 F11R EMB CD47 PARVA

[truncated: 6 more sheets: GOUpCocultureBP, GOUpCocultureCC, GOUpCocultureMF, GODownCocultureBP, GODownCocultureCC, GODownCocultureMF]
