# Supplementary material for: ALCAM: A Novel Surface Marker on EpCAMlow Circulating Tumor Cells
Source: Biomedicines. 2022 Aug 16;10(8):1983. doi: 10.3390/biomedicines10081983 (PMC9405826; doi:10.3390/biomedicines10081983)
Supplement: Supplementary file 1 [file biomedicines-10-01983-s001.zip › Supplementary File S6.xlsx]

## Sheet: Molecules
© 2000-2022 QIAGEN. All rights reserved.
Symbol	Synonym(s)	Entrez Gene Name	Location	Family	Drugs	Entrez Gene ID for Human	Entrez Gene ID for Mouse	Entrez Gene ID for Rat
Akt	AKT1/2/3, B/Akt, PKB, RAC-PK		Cytoplasm	group	TAS0612, MSC2363318A, Akt inhibitor XI, ONC-201, TAS-117, AT13148, afuresertib, ipatasertib, SR-13668
ALCAM	201951 at, activated leukocyte cell adhesion molecule, AI853494, ALCAM isoform 1, BE, BEN, CD166, DM-G, DM-GRASP, HB2, MEMD, MuS, MuSC, SC1, SC	activated leukocyte cell adhesion molecule	Plasma Membrane	other	praluzatamab ravtansine	214	11658	79559
BCL2	AW986256, B cell leukaemia/lymphoma 2, B cell leukemia/lymphoma 2, Bcl-, Bcl2 alpha, BCL2 apoptosis regulator, Bcl2 α, BCL2, apoptosis regulator, C430015F12Rik, D630044D05RIK, D830018M01RIK, LOC100046608, ORF16, PPP1R50	BCL2 apoptosis regulator	Cytoplasm	transporter	lapatinib/paclitaxel, paclitaxel/pertuzumab/trastuzumab, venetoclax, bortezomib/paclitaxel, gemcitabine/paclitaxel, pelcitoclax, paclitaxel/pembrolizumab, decitabine/venetoclax, LP-108, FCN-338, rituximab/venetoclax, chelerythrine, doxorubicin/paclitaxel, BGB-11417, doxorubicin/lapatinib/paclitaxel/trastuzumab, ABT-737, afatinib/paclitaxel, SPC2996, BCL-2 blocker, paclitaxel/rituximab, paclitaxel…	596	12043	24224
Creb	Cbp, Cyclic AMP response element binding		Nucleus	group
EGF Signaling			Other	canonical pathway
ERK/MAPK Signaling			Other	canonical pathway
FAK Signaling			Other	canonical pathway
Mmp	Matrix Metalloproteinase, MATRIX METALLOPROTEINASES, mmp (Matrix Metalloproteinase), mmpi, Mt-mmp		Nucleus	group	S 3304, hydroxamic acid-type matrix metalloprotease inhibitor, matrix metalloproteinase inhibitor, incyclinide
MMP2	CLG4, Clg, CLG4A, Ge, GelA, GELATINASE, Gelatinase A, matrix metallopeptidase 2, METALLOPROTEINASE 2, MMP-, MMP-II, MONA, TBE-1	matrix metallopeptidase 2	Extracellular Space	peptidase	MMP2 MMP9 inhibitor, rebimastat, marimastat, prinomastat	4313	17390	81686
NFkB (complex)	NF-KAPPA B, NF-κ B, nuclear factor-κ b, transcription factor nuclear factor κ b		Nucleus	complex	NF-kappaB inhibitor, dexanabinol
NFKB1	CVID12, EBP-1, KBF1, Nf kappa b DNA binding subunit, NF KAPPA B subunit P50, Nf κ b DNA binding subunit, NF κ B subunit P50, NF-k, NF-kappa-B1, NF-kappa-B, NF-kappabeta, NF-kB, NF-κ-B1, NF-κ-B, NFkappaB-p50, NFkappaB1 p105, NFKB subunit P105/P50, NFKB-p105, NFκB-p50, NFκB1 p105, NUCLEAR FACTOR KAPPA B DNA binding subunit, nuclear factor kappa B subunit 1, nuclear factor of kappa light polypeptide…	nuclear factor kappa B subunit 1	Nucleus	transcription regulator	dexamethasone/thalidomide, bortezomib/dexamethasone/thalidomide, rituximab/thalidomide, bortezomib/thalidomide, prednisone/thalidomide, triflusal, thalidomide	4790	18033	81736
PI3K/AKT Signaling			Other	canonical pathway
RELA	CMCU, NF KAPPA B subunit P65, NF κ B subunit P65, NF-k B (p65), NF-kappa B, NF-kappa B (p65), NF-κ B, NF-κ B (p65), NF-κB p65, NFKB3, NFkB, NFkB/p65, nos2, p6, p65, p65 NF-kappa B, p65 NF-κ B, p65 NFkB, p65/Rela, RELA proto-oncogene, NF-kB subunit, v-rel reticuloendotheliosis viral oncogene homolog A (avian)	RELA proto-oncogene, NF-kB subunit	Nucleus	transcription regulator	NF-kappaB decoy	5970	19697	309165
Tumor Microenvironment Pathway			Other	canonical pathway
WNT/β-catenin Signaling			Other	canonical pathway

## Sheet: Relationships
© 2000-2022 QIAGEN. All rights reserved. USE OF THIS CONTENT IS SUBJECT TO THE TERMS OF YOUR IPA END USER LICENSE AGREEMENT
From Molecule(s)	Relationship Type	To Molecule(s)	Catalyst(s)
ALCAM	activation	Akt
ALCAM	activation	MMP2
ALCAM	activation	Mmp
ALCAM	activation	NFKB1
ALCAM	activation	NFkB (complex)
ALCAM	activation	RELA
ALCAM	expression	Akt
ALCAM	expression	BCL2
ALCAM	expression	Creb
ALCAM	protein-protein interactions	Akt
Akt	causation	EGF Signaling
Akt	causation	FAK Signaling
Akt	causation	PI3K/AKT Signaling
Akt	causation	Tumor Microenvironment Pathway
Akt	causation	WNT/β-catenin Signaling
BCL2	causation	PI3K/AKT Signaling
BCL2	causation	Tumor Microenvironment Pathway
Creb	causation	ERK/MAPK Signaling
MMP2	causation	FAK Signaling
MMP2	causation	Tumor Microenvironment Pathway
Mmp	causation	Tumor Microenvironment Pathway
NFKB1	causation	FAK Signaling
NFKB1	causation	PI3K/AKT Signaling
NFKB1	causation	Tumor Microenvironment Pathway
NFkB (complex)	causation	PI3K/AKT Signaling
NFkB (complex)	causation	Tumor Microenvironment Pathway
RELA	causation	PI3K/AKT Signaling
RELA	causation	Tumor Microenvironment Pathway
RELA	protein-DNA interactions	ALCAM
